# Supplementary material for: Small RNA proﬁling for identification of microRNAs involved in regulation of seed development and lipid biosynthesis in yellowhorn
Source: Research Square preprint supplement (doi:10.21203/rs.3.rs-139285/v1), 2021-01-07
Supplement: Supplementary file 2 [file 4c3d8353532f9c81a2cc2404.xlsx]

## Sheet: Table S5a
Table S5a Differentially expressed miRNAs between HO40 and HO54.
miR_name	miR_seq	up/down	fold_change(HO54(mean)/HO40(mean))	log2(fold_change)	pvalue(t_test)	HO40(mean)	HO54(mean)	HO40/HO40_1(norm)	HO40/HO40_2(norm)	HO54/HO54_1(norm)	HO54/HO54_2(norm)	HO40/HO40_1(raw)	HO40/HO40_2(raw)	HO54/HO54_1(raw)	HO54/HO54_2(raw)	Expression level
miR171c-3p_1	TTGAGCCGCGCCAATATCACT	up	2.23421	1.15976	0.00342568	215.427	481.308	205.732	225.121	487.998	474.618	161	363	601	1252	middle
miR171k-3p	TTGAGCCGCGCCAATATCACT	up	2.23421	1.15976	0.00342568	215.427	481.308	205.732	225.121	487.998	474.618	161	363	601	1252	middle
miR160e-3p_1	GCGTGCGAGGAGCCATGCATG	down	0.148678	-2.74973	0.00905195	87.2248	12.9684	90.7267	83.7228	8.11977	17.8171	71	135	10	47	middle
miR2645-p3_1	TAACTCTCTTCAATTATTCC	up	21.6225	4.43446	0.0153026	2.79076	60.3433	0	5.58152	59.2743	61.4122	0	9	73	162	middle
miR172c-5p_1	GTAGCATCATCAAGATTCAC	down	0.0859528	-3.54031	0.0162024	14.3339	1.23204	15.3341	13.3336	0	2.46407	12	21.5	0	6.5	middle
miR482b-3p_2	TCTTCCCAACACCTCCCATACC	down	0.500544	-0.998431	0.0162886	2368.99	1185.79	2468.79	2269.2	1121.34	1250.23	1932	3659	1381	3298	middle
miR8175_2	CGATCCCCGGCAACGGCGCCA	up	inf	inf	0.021805	0	48.6747	0	0	50.3425	47.0069	0	0	62	124	middle
miR171c-5p	AGATATTGGTGCGGTTCAATC	down	0.279239	-1.84043	0.02459	95.8884	26.7758	89.4489	102.328	18.6755	34.8761	70	165	23	92	middle
miR160a-3p_1`	GCGTATGAGGAGCCATGCATA	down	0.301157	-1.73141	0.0311355	1395.53	420.274	1330.87	1460.19	307.739	532.808	1041.5	2354.5	379	1405.5	middle
Xso-miRn43	ACCGTGATTTCCTGTCCAAAC	down	0.400708	-1.31938	0.0322964	80.7981	32.3764	75.3926	86.2035	38.9749	25.778	59	139	48	68	middle
miR156e-p3_1	GCTCACATCTCTTTCTGTCAGC	up	1.52926	0.612834	0.0492566	204.64	312.948	189.12	220.16	320.731	305.166	148	355	395	805	middle

## Sheet: Table S5b
Table S5b Differentially expressed miRNAs between HO54 and HO68.
miR_name	miR_seq	up/down	fold_change(HO68(mean)/HO54(mean))	log2(fold_change)	pvalue(t_test)	HO54(mean)	HO68(mean)	HO54/HO54_1(norm)	HO54/HO54_2(norm)	HO68/HO68_1(norm)	HO68/HO68_2(norm)	HO54/HO54_1(raw)	HO54/HO54_2(raw)	HO68/HO68_1(raw)	HO68/HO68_2(raw)	Expression level
miR827_2	TTAGATGACCATCAACAAATT	down	-inf	-inf	0.00461184	7.25523	0	7.30779	7.20267	0	0	9	19	0	0	low
miR159_1	TTTGGATTGAAGGGAGCTCTACCA	down	0.0310125	-5.011	0.00922369	176.984	5.48873	186.349	167.62	10.9775	0	229.5	442.167	13	0	middle
miR398a-3p	TGTGTTCTCAGGTCACCCCTT	up	26.3711	4.72089	0.014125	17.0565	449.798	11.3677	22.7453	466.964	432.631	14	60	553	282	middle
miR172b	AGAATCTTGATGATGCTGCAT	down	0.292238	-1.77478	0.0235415	109.95	32.1317	117.737	102.164	27.4437	36.8197	145	269.5	32.5	24	middle
miR159b_1	CTTGCATATCTCTGGAGCTTC	down	-inf	-inf	0.0272123	10.1791	0	9.74372	10.6145	0	0	12	28	0	0	middle
miR7499-p3_1	GGTTAATTCCGTTAACGAAC	up	9.49331	3.24691	0.0274205	0.94772	8.99699	0	1.89544	8.02199	9.972	0	5	9.5	6.5	middle
miR168c-3p	CCCGCCTTGCATCAACTGAAT	down	0.325135	-1.62089	0.0435521	722.474	234.902	678.812	766.137	162.973	306.831	836	2021	193	200	middle
Xso-miRn05	AGGATTTGTAAAGGTACAAGTTTG	up	inf	inf	0.0496725	0	13.3142	0	0	14.3551	12.2732	0	0	17	8	middle

## Sheet: Table S5c
Table S5c Differentially expressed miRNAs between HO68 and HO81.
miR_name	miR_seq	up/down	fold_change(HO81(mean)/HO68(mean))	log2(fold_change)	pvalue(t_test)	HO68(mean)	HO81(mean)	HO68/HO68_1(norm)	HO68/HO68_2(norm)	HO81/HO81_1(norm)	HO81/HO81_2(norm)	HO68/HO68_1(raw)	HO68/HO68_2(raw)	HO81/HO81_1(raw)	HO81/HO81_2(raw)	Expression level
miR7760-p3_2	GGTGGCGGCGGTGGAGGC	up	inf	inf	0.00491088	0	119.528	0	0	120.45	118.606	0	0	63	70.5	middle
miR390	AAGCTCAGGAGGGATAGCGCC	down	0.136484	-2.8732	0.0133096	14453.2	1972.63	13389.1	15517.2	2873.59	1071.66	15856	10114.5	1503	637	high
miR399l	TGCCAAAGGAGAGTTGCCCTG	down	0.0760287	-3.71731	0.015998	414.928	31.5464	450.92	378.936	63.0929	0	534	247	33	0	middle
miR6423-p3_3	GGCGGTGGCGGTGGCGGA	up	inf	inf	0.0220898	0	54.4681	0	0	52.5774	56.3588	0	0	27.5	33.5	middle
miR6423-p5_3	GGCGGTGGCGGTGGCGGA	up	inf	inf	0.0220898	0	54.4681	0	0	52.5774	56.3588	0	0	27.5	33.5	middle
miR7760-p5_1	GGCGGTGGAGGCGGTGGA	up	inf	inf	0.0305609	0	28.2761	0	0	29.6345	26.9177	0	0	15.5	16	middle
Xso-miRn57	ACCCTCATTGGCTTCGCCTCTGGT	down	0.128578	-2.95928	0.0451044	157.011	20.1882	179.017	135.005	0	40.3765	212	88	0	24	middle
Xso-miRn05	AGGATTTGTAAAGGTACAAGTTTG	down	-inf	-inf	0.0496725	13.3142	0	14.3551	12.2732	0	0	17	8	0	0	middle
