# Supplementary material for: Small RNA proﬁling for identification of microRNAs involved in regulation of seed development and lipid biosynthesis in yellowhorn
Source: Research Square preprint supplement (doi:10.21203/rs.3.rs-139285/v1), 2021-01-07
Supplement: Supplementary file 3 [file 505361111934bc6fd6a93e58.docx]

**Table S2** Distribution of small RNAs among different categories in LO yellowhorn.

| Category | LO40_1 | LO40_2 | LO54_1 | LO54_2 | LO68_1 | LO68_2 | LO81_1 | LO81_2 | Average |
| --- | --- | --- | --- | --- | --- | --- | --- | --- | --- |
| Total | 10,957,861 | 9,280,953 | 11,705,350 | 11,515,589 | 11,982,804 | 14,562,835 | 14,843,273 | 10,469,421 | 11,914,761 |
| rRNA | 732,062 | 196,101 | 419,531 | 453,234 | 301,916 | 427,752 | 1,865,647 | 1,341,042 | 717,161 |
| tRNA | 178,774 | 135,192 | 31,102 | 41,948 | 27,177 | 46,297 | 122,962 | 234,542 | 102,249 |
| snoRNA | 42,838 | 25,164 | 4,168 | 8,823 | 2,454 | 3,660 | 10,432 | 7,863 | 13,175 |
| snRNA | 1,652 | 742 | 236 | 525 | 629 | 858 | 1,431 | 1,667 | 968 |
| Other Rfam RNA | 5,617 | 3,730 | 2,024 | 2,684 | 2,506 | 4,319 | 60,176 | 33,631 | 14,336 |
| Repeat | 6,702 | 5,635 | 2,337 | 3,288 | 1,038 | 2,175 | 10,307 | 13,511 | 5,624 |
| Unannotated | 9,991,497 | 8,915,352 | 11,246,636 | 11,005,847 | 11,647,620 | 14,078,613 | 12,774,577 | 8,839,433 | 11,062,447 |
| Unique reads | 3,137,598 | 2,664,102 | 1,892,087 | 3,428,275 | 3,929,011 | 4,647,773 | 1,262,957 | 1,714,044 | 2,834,481 |
