# Supplementary material for: Small RNA proﬁling for identification of microRNAs involved in regulation of seed development and lipid biosynthesis in yellowhorn
Source: Research Square preprint supplement (doi:10.21203/rs.3.rs-139285/v1), 2021-01-07
Supplement: Supplementary file 4 [file 7a084c2f3ea9f16e1474bbae.xlsx]

## Sheet: Sheet1
Table S8 Expression variation of all mRNA genes during seed development in the two yellowhorn lines.
gene_ID	length	effective_length	Name	Annotation	GO_Term	KOG_des	KEGG_KO	KEGG_Pathway	LO40_1_rpkm	LO54_1_rpkm	LO68_1_rpkm	LO81_1_rpkm	HO40_1_rpkm	HO54_1_rpkm	HO68_1_rpkm	HO81_1_rpkm	LO40_2_rpkm	LO54_2_rpkm	LO68_2_rpkm	LO81_2_rpkm	HO40_2_rpkm	HO54_2_rpkm	HO68_2_rpkm	HO81_2_rpkm
TRINITY_DN10000_c0_g1	296	97.02	-	-	-	-	-	-	2.38	1.49	0	0	11.56	0	0	2.34	3.3	0.73	0	0	0	0	0	0
TRINITY_DN10001_c0_g1	219	33.27	-	-	-	-	-	-	1.26	9.22	20.04	0	0	1.68	9.59	6.84	1.14	2.14	0.55	23.6	0	1.57	1.54	1.27
TRINITY_DN10001_c0_g2	219	33.27	-	-	-	-	-	-	0	1.32	0	2.6	3.46	0	0	0	3.97	0	0	0	0	0	0	0
TRINITY_DN10001_c0_g3	219	33.27	-	-	-	-	-	-	0	0	1.72	8.33	0	0	0	10.8	2.83	0	0	0.67	1.66	0	0	1.9
TRINITY_DN10002_c0_g1	400	201	-	-	-	-	-	-	3.97	0.51	2.12	0	1.26	1.29	0.85	0	3.19	1.6	2.91	0	2.75	0.69	0.76	0
TRINITY_DN10003_c0_g1	415	211.06	-	-	-	-	-	-	90.24	1.34	0.19	0	147.98	0.95	1.38	0	283.44	1.1	0.51	0.21	101.54	0.4	0	0
TRINITY_DN10004_c0_g1	453	254	CKX7	cytokinin dehydrogenase	GO:0019139(cytokinin dehydrogenase activity);GO:0050660(flavin adenine dinucleotide binding);GO:0008762(UDP-N-acetylmuramate dehydrogenase activity);GO:0009823(cytokinin catabolic process)	-	K00279	ko00908(Zeatin biosynthesis)	0.27	0	1.95	3.59	0	0.26	0	1.36	1.4	0.32	0.18	2.88	0.66	0.24	1.72	0
TRINITY_DN10005_c0_g1	1776	1577	-	-	-	-	-	-	8.6	4.25	9.68	6.56	13.18	5.07	6.97	7.8	8.27	4.71	3.11	9.59	5.83	6.65	6.24	10.32
TRINITY_DN10006_c0_g1	858	659	-	-	-	-	-	-	0	0.48	0.51	2.16	0.03	0.06	0	1.26	0	0.16	0.51	3.2	0.05	0	0	0
TRINITY_DN10006_c0_g2	1089	890	-	-	-	-	-	-	0.85	0.66	0.25	0	0.99	0.4	0.43	0	0.89	0.3	0.18	0	0.63	0.55	0.46	0
TRINITY_DN10007_c0_g1	853	654	-	-	-	-	-	-	5.04	0	0.13	0.13	8.43	0.39	0.34	0	3.37	0.56	0.4	0	2.76	1.89	0.24	0
TRINITY_DN10007_c0_g2	1950	1751	-	-	-	-	-	-	16.36	4.74	2.4	3.29	12.8	5.57	4.72	1.49	17.33	6.05	3.55	0.94	12.84	7.93	4.13	0
TRINITY_DN10009_c0_g1	213	29.64	-	-	-	-	-	-	0	1.39	0	0	3.11	0	0	0	0	1.54	0	0	1.24	0.59	0	0
TRINITY_DN10009_c0_g2	273	75.15	-	-	-	-	-	-	1.12	0	0	0	0	0	0	0.25	0	0.58	0	0	0.49	0.23	0	0
TRINITY_DN1000_c0_g1	440	241	-	-	-	-	-	-	0.5	0.1	0.62	2.37	0.67	1.23	0.88	1.82	0.23	0.85	0.44	4.19	0.21	0.68	0.53	0
TRINITY_DN1000_c0_g2	261	64.57	-	-	-	-	-	-	0.4	2.17	0.29	0	0	0	0	8.17	0.87	0.96	1.19	0	1.79	1.79	1.47	0
TRINITY_DN10010_c0_g1	811	612	PERK14	DNA (cytosine-5-)-methyltransferase	GO:0016021(integral to membrane);GO:0005886(plasma membrane);GO:0005524(ATP binding);GO:0004674(protein serine/threonine kinase activity)	-	K00558	ko00270(Cysteine and methionine metabolism)	50.2	3.63	21.4	38.42	40.54	8.15	10.18	6.84	35.16	7.7	3.48	5.92	27.44	7.9	10.12	120.48
TRINITY_DN10010_c0_g2	920	721	-	-	-	-	-	-	1.18	0.38	2.2	8.75	2.92	0.74	0.65	0.2	1.32	1.03	0.47	1.57	1.79	0.68	1.5	18.48
TRINITY_DN10010_c0_g3	628	429	-	-	-	-	-	-	0	0	0	0	0	0	0	0	0	0	0	0	0	0	0	0
TRINITY_DN10011_c0_g1	791	592	-	-	-	-	-	-	107.57	16.5	5.84	16.88	89.99	19.96	2.7	11.14	91.36	24.93	5.12	0	20.88	13.74	5.43	22.9
TRINITY_DN10011_c0_g2	786	587	-	-	-	-	-	-	24.07	11.51	5.5	8.59	138.05	35.15	6.84	1.67	6.18	2.74	2.35	15.86	66.26	23.51	8.74	0.57
TRINITY_DN10012_c0_g1	360	161	-	-	-	-	-	-	0	0.13	0	0	0	0	0	4.12	0.47	0	0.84	3.07	0	0	0	0
TRINITY_DN10012_c0_g2	507	308	-	-	-	-	-	-	1.36	0.6	1.21	0.22	0.45	0.48	0.62	3.07	2.57	0.06	0.21	0	1.98	1.41	0.55	0
TRINITY_DN10013_c0_g1	458	259	-	-	-	-	-	-	0.3	0.06	0	0	0.18	0	0.25	1.1	0	0	0.07	0	0	0.28	0.15	0
TRINITY_DN10013_c0_g2	650	451	-	-	-	-	-	-	0.11	0.1	0.04	0.5	0	0.49	0	0.55	1.3	0.16	0	0	0.57	0.3	0.29	0
TRINITY_DN10014_c0_g1	218	32.65	-	-	-	-	-	-	1.72	0	0	0	0	0	0	0	0	0	1.56	0	0.6	0	0	0
TRINITY_DN10014_c0_g2	210	27.9	-	-	-	-	-	-	2.74	2.02	0	0	0	0	0	0	0.78	0	2.79	0	0	0	0	0
TRINITY_DN10014_c0_g3	208	26.77	-	-	-	-	-	-	0	0.86	0	0	0	0	0	0	0	1.58	0	0	0	0.69	0	0
TRINITY_DN10014_c0_g4	265	68.02	-	-	-	-	-	-	0	0	0.31	0	0	0	4.7	0	0	0	4.55	0	0	0	5.01	0
TRINITY_DN10014_c0_g5	204	24.6	-	-	-	-	-	-	0	0	0	0	0	2.57	1.07	1.75	3.66	0	0	0	8.74	1.51	2.41	0
TRINITY_DN10014_c0_g6	262	65.42	-	-	-	-	-	-	0.32	0.34	2.27	0	2.82	0	0	3.6	15.06	2.33	0.28	0	20.47	3.36	0	0
TRINITY_DN10014_c0_g7	214	30.23	-	-	-	-	-	-	14.88	8	0.61	0	0	0	0	0	10.88	0.69	5.36	0	0	0	0	0
TRINITY_DN10014_c0_g8	206	25.67	-	-	-	-	-	-	0	0	2.17	0	15.84	10.99	16.65	8.32	0	0	0	0	37.82	5.92	12.53	0
TRINITY_DN10014_c0_g9	212	29.05	-	-	-	-	-	-	1.8	3.21	0	0	0	1.34	0	0	4.8	0	0.79	0	0	0	0	0
TRINITY_DN10015_c0_g1	500	301	-	-	-	-	-	-	0.21	1.37	1.17	0.23	0.46	3.15	0.57	4.78	0	1.95	0.24	5.52	0.55	1.21	1.24	0
TRINITY_DN10016_c0_g1	504	305	-	-	-	-	-	-	1.31	0.41	1.1	0	0	0.43	0	0.37	1.42	0.23	0	0	0.24	0.29	0	0
TRINITY_DN10017_c0_g1	626	427	-	-	-	-	-	-	0.98	0	0	0	2.67	0	0	0	0.95	1.22	0	0	0	0.42	0.14	0
TRINITY_DN10017_c0_g2	635	436	-	-	-	-	-	-	2.17	1.94	0.51	0	0.66	1.11	1.37	0	0.45	0.56	0.8	0	3.59	1.7	0.13	0
TRINITY_DN10019_c0_g1	361	162	-	-	-	-	-	-	1.69	0.21	1.03	0	1.56	1.11	1.2	0	0.8	0	0.15	0	1.36	0.15	0.65	0
TRINITY_DN10019_c0_g2	485	286	-	-	-	-	-	-	0	0.6	0	0	0	0.93	0.14	0	0.73	0.87	0.3	0	0.84	0.28	1.06	0
TRINITY_DN1001_c0_g1	741	542	PCMP-H60	-	GO:0005488(binding)	[R] General function prediction only	-	-	0.23	0.19	0.31	0.89	0	0.38	0.27	1.12	1.08	0.62	0.03	0	0.27	0.16	0.6	0
TRINITY_DN10020_c0_g1	236	44.76	-	-	-	-	-	-	0	0	0	0	0	0	0.48	4.23	0	0	0	0	0	0	0	0
TRINITY_DN10020_c0_g2	237	45.49	-	-	-	-	-	-	0	0	0	3.05	2.02	0	0	0	2.49	0	0	0	0	0	0.37	0
TRINITY_DN10021_c0_g1	514	315	-	-	-	-	-	-	0	0.2	0.29	0	0	0.14	0	0	0	0	0.05	4.91	0	0	0	0
TRINITY_DN10021_c0_g2	641	442	-	-	-	-	-	-	0.52	0	0	0	0.42	0.45	0.72	1.11	0.68	0	0.13	0.61	0.38	0.24	0.73	0
TRINITY_DN10022_c0_g1	370	171	-	-	-	-	-	-	0	0	0	5.47	0	0	0	0	0	0	0.21	0	0	0	0	0
TRINITY_DN10022_c0_g2	264	67.15	-	-	-	-	-	-	0	0	0	0	0	0	0	5.07	0	0	0	0	0	0.52	0.51	0
TRINITY_DN10023_c0_g1	1546	1347	-	-	-	[G] Carbohydrate transport and metabolism	-	-	0	0	0	0	0	0	0	0	0.14	0.08	0	0	0.7	0	0	0
TRINITY_DN10023_c0_g2	1547	1348	-	-	-	[G] Carbohydrate transport and metabolism	-	-	0	1.07	0.44	0	0	0.64	0.54	0	4.45	1.27	0.62	0	2.69	0.34	0	0
TRINITY_DN10023_c0_g3	1532	1333	-	-	-	[G] Carbohydrate transport and metabolism	-	-	1.77	0	0	0	0.63	0	0	0.26	0.19	0	0	0	0.21	0	0	0
TRINITY_DN10023_c0_g4	1547	1348	-	-	-	[G] Carbohydrate transport and metabolism	-	-	12.07	0	0.44	0	11.3	0.8	0.41	0	6.63	0	0	0	3.05	1.52	0.8	0
TRINITY_DN10024_c0_g1	246	52.29	-	-	-	-	-	-	0	0	0	7.95	0	0	0	7.24	0	0	0	0	0	0	0	0
TRINITY_DN10025_c0_g1	914	715	At1g15400	-	GO:0005886(plasma membrane)	-	-	-	14.85	3.55	7.79	38.86	22.28	2.86	10.18	21.92	15.55	3.31	4.4	45.29	15.99	3.36	14.07	20.61
TRINITY_DN10026_c0_g1	247	53.07	-	-	-	-	-	-	9.28	0	2.45	9.46	0	4.74	1.6	0	4.22	3.63	0.34	0	4.52	3.58	2.06	0
TRINITY_DN10026_c0_g2	246	52.29	-	-	-	-	-	-	1.03	2.76	0	0	0	1.94	0	0	0.77	4.15	0.7	0	0	0.36	0.84	0
TRINITY_DN10027_c0_g1	211	28.47	BGAL3	-	GO:0048046(apoplast);GO:0004565(beta-galactosidase activity);GO:0043169(cation binding);GO:0005529(sugar binding);GO:0005975(carbohydrate metabolic process)	[G] Carbohydrate transport and metabolism	-	-	0.74	3.62	1.96	0	0	1.31	1.49	1.33	0	0.63	0	0	0	2.45	3.59	0
TRINITY_DN10028_c0_g1	305	106	AGL80	-	GO:0005634(nucleus);GO:0005515(protein binding);GO:0043565(sequence-specific DNA binding);GO:0003700(sequence-specific DNA binding transcription factor activity)	[K] Transcription	-	-	0.99	0.97	0.7	0.33	1.09	1.05	2.01	6.79	3.02	1.51	0.35	0	1.22	0.49	1.29	0
TRINITY_DN10029_c0_g1	717	518	-	-	-	-	-	-	21.92	0	2.62	0	27.9	0	4.35	0.26	0	0	2.65	0	16.76	4.59	3.16	0
TRINITY_DN10029_c0_g2	717	518	-	-	-	-	-	-	8.31	3.7	0	4.05	15.08	2.22	0	0.26	55.42	3.34	0	0	15.13	1.02	0	0
TRINITY_DN1002_c0_g1	789	590	-	-	-	-	-	-	1.18	0	0.13	0	0.94	0.09	0.32	0.39	0.93	0.54	0.06	0	0.41	0.35	0.32	0
TRINITY_DN10030_c0_g1	211	28.47	-	-	-	-	-	-	0	0	1.3	18.25	6.47	0	0	1.33	0	0	0	0	0	0	0	62.84
TRINITY_DN10031_c0_g1	316	117	-	-	-	-	-	-	3.95	1.59	0.48	0	0	0.01	0.18	0	7.89	0.98	0.63	0	0	0	0	0
TRINITY_DN10031_c0_g2	318	119	-	-	-	-	-	-	0	0.51	0	0	1.16	0.92	0	0	0	1.13	0	0	2.17	1.76	1.43	0
TRINITY_DN10032_c0_g1	220	33.9	-	-	-	-	-	-	1.24	0.61	0	0	0	3.84	0	0	1.11	2.63	0	0	0	0	0.5	0
TRINITY_DN10032_c1_g1	522	323	-	-	-	-	-	-	0.33	0.19	0.06	0	0	0.17	0.13	0	1.23	0	0.45	4.24	0.46	0.32	0.05	0
TRINITY_DN10033_c0_g1	226	37.8	-	-	-	-	-	-	6.12	0	0	0	6.7	0	0	0	1.5	0	1.45	0	0.49	1.38	0	0
TRINITY_DN10034_c0_g1	238	46.22	-	-	-	-	-	-	0.91	0	0	0	1	2.41	0.46	0	0.82	0.39	0	0	0	0	0.37	0
TRINITY_DN10034_c0_g2	231	41.21	-	-	-	-	-	-	1.02	0.5	0	0	0	0	0	0	0.91	0	0	0	0	0	0	0
TRINITY_DN10035_c0_g1	642	443	-	-	-	-	-	-	1.61	0	0.25	0	4.61	0.08	0	0	3.74	0.22	0	0	0.33	0.18	0	0
TRINITY_DN10035_c0_g2	1701	1502	At5g67130	-	GO:0046658(anchored to plasma membrane);GO:0004629(phospholipase C activity);GO:0035556(intracellular signal transduction);GO:0006629(lipid metabolic process)	-	-	-	24.83	4.6	3.72	0.71	21.51	5.43	5.51	0.76	33.17	6.13	2.92	1.27	15.64	7.09	4.05	0
TRINITY_DN10036_c0_g1	3173	2974	BGAL9	beta-galactosidase	GO:0048046(apoplast);GO:0009505(plant-type cell wall);GO:0005774(vacuolar membrane);GO:0004565(beta-galactosidase activity);GO:0043169(cation binding);GO:0005529(sugar binding);GO:0005975(carbohydrate metabolic process)	[G] Carbohydrate transport and metabolism	K01190	ko00052(Galactose metabolism);ko00511(Other glycan degradation);ko00600(Sphingolipid metabolism)	39.28	16.88	11.29	17.27	31.28	19.44	17.24	21.32	28.09	21.93	15.42	11.31	35.52	21.45	23.07	13.62
TRINITY_DN10037_c0_g1	609	410	-	-	-	-	-	-	0.32	0	0	0	0.9	0.53	0.26	0	0	0.55	0	0	0.31	0.76	0	0
TRINITY_DN10037_c0_g2	467	268	-	-	-	-	-	-	0	1.19	0.14	0	0	0.44	0	0	1.07	0	0.34	0	0.01	0	0.13	0
TRINITY_DN10037_c0_g3	605	406	-	-	-	-	-	-	0.66	0.13	0	0.21	0	0	0	0	0.13	0.28	0	0	0	0	0	0
TRINITY_DN10038_c0_g1	324	125	-	-	-	[P] Inorganic ion transport and metabolism	-	-	0	0	0	0	0	0	0	4.54	0	0	0.29	3.23	0	0	0.27	0
TRINITY_DN10039_c0_g1	609	410	-	-	-	-	-	-	1.95	2.06	1.13	0	1.4	0.82	3.94	1.11	1.01	1.35	1.83	0	0.85	0.13	3.49	0
TRINITY_DN1003_c0_g1	217	32.04	-	-	-	-	-	-	2.62	1.29	4.06	0	0	0	0.66	7.09	0	0	0.57	0	0	4.35	1.59	0
TRINITY_DN10041_c0_g1	1046	847	ARF	Arf/Sar family, other	GO:0005794(Golgi apparatus);GO:0005525(GTP binding);GO:0006886(intracellular protein transport);GO:0006471(protein ADP-ribosylation);GO:0007264(small GTPase mediated signal transduction);GO:0016192(vesicle-mediated transport)	[U] Intracellular trafficking, secretion, and vesicular transport	K07977	-	343.07	161.86	265.08	307.95	686.06	306.73	347.32	287.61	697.82	197.26	214.69	62.47	653.09	279.41	248.87	396.62
TRINITY_DN10041_c0_g2	1047	848	ARF	Arf/Sar family, other	GO:0005794(Golgi apparatus);GO:0005525(GTP binding);GO:0006886(intracellular protein transport);GO:0006471(protein ADP-ribosylation);GO:0007264(small GTPase mediated signal transduction);GO:0016192(vesicle-mediated transport)	[U] Intracellular trafficking, secretion, and vesicular transport	K07977	-	440.13	189.06	47.02	33.28	106.86	55.81	74.43	45.42	90.48	232.68	24.2	621.05	71.7	47.79	34.02	42.19
TRINITY_DN10042_c0_g1	269	71.55	-	-	-	-	-	-	3.96	0.86	0	0	0	0	0	0	2.42	0	0.36	0	0	0	0	0
TRINITY_DN10042_c0_g2	266	68.9	-	-	-	-	-	-	4.39	0	0	0	0	0	0	0	4.32	0	1.49	0	0	0	0	0
TRINITY_DN10042_c0_g3	223	35.82	-	-	-	-	-	-	3.01	0	0	0	0	0	0	0	0	0	0	0	0	0	0	0
TRINITY_DN10043_c0_g1	234	43.32	-	-	-	-	-	-	2.43	0.48	0	0.4	0	0.43	1.96	0	2.18	0	0	0	2.13	0	0	0
TRINITY_DN10044_c0_g1	388	189	-	-	-	-	-	-	2.11	0	0.1	0.09	0	0	0.23	0	1.1	0	0.1	0	0	0	0	0
TRINITY_DN10044_c0_g2	308	109	-	-	-	-	-	-	1.54	0.57	0	0	0.84	0.17	0.59	0	1.38	0.16	0	0	0	0.16	0	0
TRINITY_DN10046_c0_g1	350	151	-	-	-	-	-	-	0.54	0	0	0	0	0.12	0.14	1.38	1.5	0	0.36	0	1.47	0.88	0.56	0
TRINITY_DN10046_c0_g2	350	151	-	-	-	-	-	-	0.72	0	1.23	0	0	0.12	0.14	0	0	0	0	0	0	0.16	0	0
TRINITY_DN10047_c0_g1	635	436	-	-	-	-	-	-	0.53	0.05	0	2.86	0	0.64	0.29	0.26	0.35	0.12	0.08	0	0.25	0.24	0.2	0
TRINITY_DN10048_c0_g1	2490	2291	FH4	-	GO:0005911(cell-cell junction);GO:0016021(integral to membrane);GO:0005886(plasma membrane);GO:0003779(actin binding);GO:0030041(actin filament polymerization)	[T] Signal transduction mechanisms ;[Z] Cytoskeleton	-	-	0.07	0.12	0.43	2.23	0.05	0.3	0.42	5.67	0.14	0.35	0.2	0.75	0.1	0.96	0.68	3.05
TRINITY_DN10048_c0_g2	746	547	FH4	-	GO:0005911(cell-cell junction);GO:0016021(integral to membrane);GO:0005886(plasma membrane);GO:0003779(actin binding);GO:0030041(actin filament polymerization)	[T] Signal transduction mechanisms ;[Z] Cytoskeleton	-	-	0	0	0.16	0.26	0	0.08	0.12	7.66	0.53	0	0.77	1.7	0.1	0	0	0
TRINITY_DN10048_c1_g1	387	188	FH4	-	GO:0005911(cell-cell junction);GO:0016021(integral to membrane);GO:0005886(plasma membrane);GO:0003779(actin binding);GO:0030041(actin filament polymerization)	[T] Signal transduction mechanisms ;[Z] Cytoskeleton	-	-	0	0.53	0	0	0.08	0.75	0.23	0	0	0.6	0	0	0	0.91	0.09	0
TRINITY_DN10049_c0_g1	2024	1825	ESC	-	GO:0005634(nucleus);GO:0003680(AT DNA binding);GO:0003690(double-stranded DNA binding);GO:0006325(chromatin organization);GO:0010150(leaf senescence);GO:0009640(photomorphogenesis)	-	-	-	13.85	2.71	2.06	7.09	30.99	6.55	2.77	12.57	32.11	4.85	0.65	2.17	18.1	2.54	1.77	3.92
TRINITY_DN1004_c0_g1	222	35.18	-	-	-	-	-	-	0	0	0	5.91	0	0	1.21	2.69	0	0	0	19.14	0	0	0.48	0
TRINITY_DN10050_c0_g1	1136	937	NHX3	-	GO:0016021(integral to membrane);GO:0005774(vacuolar membrane);GO:0015385(sodium:hydrogen antiporter activity);GO:0006885(regulation of pH);GO:0009651(response to salt stress)	[P] Inorganic ion transport and metabolism	-	-	5.79	2.22	0.57	2.7	5.36	3.52	3.34	5.93	6.38	2.34	1.46	3.33	5.83	2.96	1.41	0
TRINITY_DN10050_c0_g2	893	694	NHX3	-	GO:0016021(integral to membrane);GO:0005774(vacuolar membrane);GO:0015385(sodium:hydrogen antiporter activity);GO:0006885(regulation of pH);GO:0009651(response to salt stress)	[P] Inorganic ion transport and metabolism	-	-	6.81	1.16	0.8	0.82	5.01	1.84	2.06	2.29	7.69	3.1	0.83	0	3.59	1.44	1.5	0
TRINITY_DN10051_c0_g1	370	171	-	-	-	-	-	-	0.25	0.48	0.22	0	0	0.33	0.12	0	0.66	0	0	8.14	0	0	0	0
TRINITY_DN10052_c0_g1	518	319	-	-	-	-	-	-	0.46	0.45	0	1.19	2.31	0.23	0.47	1.07	0.41	1.4	0.57	0	0	1.15	0.16	0
TRINITY_DN10052_c1_g1	1114	915	-	-	-	-	-	-	0.23	0.61	0	0.81	0.55	0.33	0.42	0.35	0.08	0.45	0.16	1.91	0.18	1.69	0.22	3.29
TRINITY_DN10053_c0_g1	1031	832	ARR9	-	GO:0005634(nucleus);GO:0005515(protein binding);GO:0000156(two-component response regulator activity);GO:0007623(circadian rhythm);GO:0009736(cytokinin mediated signaling pathway);GO:0006355(regulation of transcription, DNA-dependent);GO:0006351(transcription, DNA-dependent)	[K] Transcription	-	-	27.75	4.68	4.63	6.25	22.37	3.48	8.43	9.44	25.55	3.28	2.37	5.02	16.57	2.7	7.48	8.22
TRINITY_DN10054_c0_g1	359	160	-	-	-	-	-	-	0	0	0	5.74	0	0	0	9.94	0	0	0	7.99	0	0	0	0
TRINITY_DN10055_c0_g1	261	64.57	-	-	-	-	-	-	1.3	0.32	0.29	0	1.43	0.29	2.97	0	2.92	0.28	0.28	0	1.14	1.08	1.32	0
TRINITY_DN10055_c1_g1	370	171	-	-	-	-	-	-	0.74	0.6	0	0	1.35	0.22	0.12	0	0.55	0.21	0	0	0.11	0.41	0.3	0
TRINITY_DN10055_c2_g1	341	142	-	-	-	-	-	-	0.44	0.58	0.13	0	0	0.39	0.45	0	0	0.13	0.13	0	0	0.25	0.72	0
TRINITY_DN10057_c0_g1	399	200	-	-	-	-	-	-	9.77	2.48	0.28	0	9.21	3.16	0.64	0	8.58	4.01	0	0	4.24	1.48	0.34	0
TRINITY_DN10058_c0_g1	262	65.42	-	-	-	-	-	-	0	0.32	0.28	0	0.7	0.57	0	4.05	0	0	0	0	0	0.27	0.52	0.32
TRINITY_DN10059_c0_g1	308	109	-	-	-	-	-	-	0	0	0	0	0	0.17	0	3.82	1.47	0.98	0	0	0	0	0	0
TRINITY_DN10059_c0_g2	289	90.17	-	-	-	-	-	-	0.93	0	0	0	0	0	0	0	1.36	0	0	0	2.45	0	0	0
TRINITY_DN1005_c0_g1	245	51.51	-	-	-	-	-	-	0	3.15	2.7	0	13.85	2.16	3.3	0	1.46	0	1.07	0	2.15	0	0.33	0
TRINITY_DN1005_c0_g2	245	51.51	-	-	-	-	-	-	0.82	0.45	0.9	0	0	0	0	4.78	0	0	0	0	0.72	0	0	0
TRINITY_DN10060_c0_g1	887	688	-	-	-	-	-	-	13.59	5.91	2.5	0	16.13	9.49	2.29	0	9.53	7.36	3.83	0	22.24	4.91	2.33	0
TRINITY_DN10061_c0_g1	594	395	-	-	-	-	-	-	2.13	1.04	0.28	0	1.4	0.99	0.86	0.05	1.38	0.72	0.6	0	1.21	1.72	0.22	0
TRINITY_DN10063_c0_g1	293	94.06	-	-	-	-	-	-	1.79	0	0	2.95	0.73	0	0	0.6	0	0	0	0	0.39	0	0.18	0
TRINITY_DN10063_c0_g2	291	92.11	-	-	-	-	-	-	0	0	0	0	0	0	0	0	0	0	0.6	20.71	0	0	0	0
TRINITY_DN10064_c0_g1	357	158	-	-	-	-	-	-	0.53	0.26	3.53	0	0	0.59	2.29	0	0.12	1.47	0.69	4.26	0.23	1.21	0.65	0
TRINITY_DN10065_c0_g1	269	71.55	-	-	-	-	-	-	2.94	6.92	5.97	0.97	5.15	5.2	1.19	0	3.69	3.49	2.81	3.76	10.31	3.89	0.48	2.35
TRINITY_DN10066_c0_g1	305	106	COPT5	-	GO:0016021(integral to membrane);GO:0005770(late endosome);GO:0009506(plasmodesma);GO:0005774(vacuolar membrane);GO:0015089(high affinity copper ion transmembrane transporter activity);GO:0009737(response to abscisic acid stimulus)	[P] Inorganic ion transport and metabolism	-	-	0	0	1.17	0	1.77	0.6	0	0	0.71	0	0	0	0	0.66	0.47	0
TRINITY_DN10066_c0_g2	447	248	COPT5	-	GO:0016021(integral to membrane);GO:0005770(late endosome);GO:0009506(plasmodesma);GO:0005774(vacuolar membrane);GO:0015089(high affinity copper ion transmembrane transporter activity);GO:0009737(response to abscisic acid stimulus)	[P] Inorganic ion transport and metabolism	-	-	2.04	1.64	1.45	0.4	0.44	0.78	0.88	5.1	0.1	0	0.21	0	0	0.4	0.77	0
TRINITY_DN10066_c1_g1	233	42.61	COPT5.1	-	GO:0016021(integral to membrane);GO:0005375(copper ion transmembrane transporter activity)	[P] Inorganic ion transport and metabolism	-	-	0.74	0.54	1.96	2.16	0	2.84	1.93	7.48	3.17	0	0	0	14.28	0	0	0
TRINITY_DN10067_c0_g1	563	364	-	-	-	-	-	-	0.58	0	0.05	1.43	0.51	0.15	0.23	0	0.21	0.1	0	0	1.22	0.05	0	0
TRINITY_DN10068_c0_g1	224	36.47	-	-	-	-	-	-	0	0.57	0	0	0	0	0	0.51	1.89	0	0	0	0	0.48	0	0
TRINITY_DN10068_c0_g2	254	58.7	-	-	-	-	-	-	1.43	0	0	0	0	0	0.72	0.65	2.36	0.91	0.31	0	1.88	0	1.74	0
TRINITY_DN10069_c0_g1	560	361	-	-	-	-	-	-	1.51	0.69	0.51	0.86	1.4	0.1	0.12	0.63	1.36	0.2	0.41	0	0.51	0.72	0.19	0
TRINITY_DN10071_c0_g1	1004	805	-	-	-	-	-	-	23.45	11.84	28.46	16.31	23.19	8.04	13.35	6.02	23.34	12.19	12.88	3.26	20.77	13.32	10.83	0.05
TRINITY_DN10072_c0_g1	835	636	RPL23A	large subunit ribosomal protein L23Ae	GO:0005840(ribosome);GO:0000166(nucleotide binding);GO:0019843(rRNA binding);GO:0003735(structural constituent of ribosome);GO:0006412(translation)	[J] Translation, ribosomal structure and biogenesis	K02893	ko03010(Ribosome)	323.06	87.48	111.77	294.21	432.28	82.18	163.44	291.37	554.58	87.97	91.68	225.42	516.44	88.88	111.93	242.69
TRINITY_DN10073_c0_g1	759	560	-	-	-	-	-	-	0.41	0.22	0.2	0.93	0.74	0.17	0.23	0	0.84	0.45	0.13	0	0	0.75	0.18	0
TRINITY_DN10074_c0_g1	262	65.42	-	-	-	-	-	-	1.93	0	0	0	0	0	0	0	0	0	0	0	0	0	0	0.32
TRINITY_DN10074_c0_g2	261	64.57	-	-	-	-	-	-	0	0	0	0	0.36	0.29	0	0	2.34	0.28	0	0	1.71	1.08	2.11	0
TRINITY_DN10075_c0_g1	645	446	-	-	-	-	-	-	2.36	0.37	0.17	0.93	0.52	0.13	0.24	0	1.23	0.6	0.21	0	2.03	0.35	0.42	0
TRINITY_DN10075_c1_g1	1377	1178	-	-	-	-	-	-	0.79	0.11	0.17	1.49	0.12	0.09	0.22	0.71	1.12	0.21	0.28	0.38	0.42	0.12	0.17	0
TRINITY_DN10076_c0_g1	327	128	-	-	-	-	-	-	2.46	0.16	1.16	11.77	3.24	1.16	1.33	2.96	2.36	0.14	0	0	3.6	0	0.67	0
TRINITY_DN10077_c0_g1	982	783	-	-	-	-	-	-	1.4	0.71	1.21	0.58	0.24	0.85	0.73	3.07	1.56	0.71	0.58	3.01	0.19	1.02	1.07	0
TRINITY_DN10078_c0_g1	433	234	-	-	-	-	-	-	0	0	0	0	1.13	0	0.16	0	0	0	0	0	0.98	0	0	0
TRINITY_DN10078_c0_g2	573	374	-	-	-	-	-	-	6.91	0	0	0	1.14	0	0.06	0	1.46	0	0	0	3.37	0	0	0
TRINITY_DN10078_c0_g3	573	374	-	-	-	-	-	-	0	0	0	0	0	0	0.06	0	1.57	0	0	0	0.65	0	0	0
TRINITY_DN10079_c0_g1	726	527	-	-	-	-	-	-	0.28	0.16	1.06	0	0	0.16	0.81	0	0	0.37	0.31	0	0	1.42	1.97	0
TRINITY_DN10079_c0_g2	725	526	-	-	-	-	-	-	0	0	0	0.53	0	0.08	0	0.72	0	0	0	0.09	0.35	0	0	0
TRINITY_DN10080_c0_g1	515	316	-	-	-	-	-	-	1.73	0.07	0	0	1.09	0.12	0	0	1.49	0.11	0	0	2.98	0.77	0.05	0
TRINITY_DN10081_c0_g1	468	269	-	-	-	-	-	-	0.08	0	0	0.84	1.03	0.14	0.71	0.85	0.42	0.46	0.41	0	0	0.06	0	0
TRINITY_DN10081_c0_g2	468	269	-	-	-	-	-	-	0.08	0	0	0.84	0	0	0	1.97	0	0	0	0	0.27	0.06	0.38	0
TRINITY_DN10082_c0_g1	848	649	RPS25	small subunit ribosomal protein S25e	GO:0005840(ribosome)	[J] Translation, ribosomal structure and biogenesis	K02975	ko03010(Ribosome)	1.72	0.38	0.37	2.54	2.48	0.29	1.28	4.52	2.99	0.55	0.37	2.18	0.85	0.27	0.31	1.49
TRINITY_DN10083_c0_g1	2164	1965	-	-	-	-	-	-	0.72	0.72	0.38	0.19	0.25	0.65	0.49	0	0.78	1	0.3	0	1.22	0.34	0.36	0
TRINITY_DN10084_c0_g1	225	37.13	-	-	-	-	-	-	0	0	2	0	0	0	0.57	11.22	2.03	0	0	0	0.5	1.41	0.46	0
TRINITY_DN10085_c0_g1	431	232	-	-	-	-	-	-	1.09	0	0.08	2.24	2.48	0.16	0.37	0	2.19	0	0	0	0.48	0.08	0	0
TRINITY_DN10085_c1_g1	234	43.32	-	-	-	-	-	-	0.49	0.95	0	0	0.53	0	2.46	3.5	1.74	0.82	0	0	0	0.4	0.39	0
TRINITY_DN10086_c0_g1	288	89.2	-	-	-	-	-	-	1.18	0	0	0.58	0	0.42	0.48	2.97	3.54	0.4	1.03	0	2.47	0	0.76	0
TRINITY_DN10086_c1_g1	247	53.07	-	-	-	-	-	-	1.98	0	2.45	0	0	0	0	0	0	0.67	0.69	4.23	0.35	1.31	0.32	0
TRINITY_DN10087_c0_g1	455	256	-	-	-	-	-	-	1.23	0.48	1.31	3.25	1.89	1.09	0.5	7.39	2.58	1.11	0.14	0	3.46	0.95	0.07	0
TRINITY_DN10088_c0_g1	493	294	-	-	-	-	-	-	2.57	0	0	0	3.21	0	0	0	1.03	0.18	0	0	1.69	0.12	0	0
TRINITY_DN10088_c1_g1	222	35.18	-	-	-	-	-	-	4.18	0.59	0	0	2.62	0	0	0	21.43	0	0	0	0	0	0	0
TRINITY_DN10089_c0_g1	284	85.37	WRI1	AP2-like factor, ANT lineage	GO:0005634(nucleus);GO:0003677(DNA binding);GO:0003700(sequence-specific DNA binding transcription factor activity);GO:0009873(ethylene mediated signaling pathway);GO:0006110(regulation of glycolysis);GO:0009744(response to sucrose stimulus);GO:0019432(triglyceride biosynthetic process)	-	K09285	-	0	1.22	0	0	0	0.69	4.14	0	0	0	0	0	5.71	1.97	1.64	0
TRINITY_DN10089_c0_g2	245	51.51	WRI1	AP2-like factor, ANT lineage	GO:0005634(nucleus);GO:0003677(DNA binding);GO:0003700(sequence-specific DNA binding transcription factor activity);GO:0009873(ethylene mediated signaling pathway);GO:0006110(regulation of glycolysis);GO:0009744(response to sucrose stimulus);GO:0019432(triglyceride biosynthetic process)	-	K09285	-	3.35	0	1.47	0	1.8	1.43	0	0	4.13	1.05	1.78	7.84	2.25	0	0	0
TRINITY_DN1008_c0_g1	360	161	-	-	-	-	-	-	0.13	0.38	0.12	0	1.72	0.23	0.79	0	0.47	0.22	0.45	0	2.29	0.22	0.63	0
TRINITY_DN10091_c0_g1	235	44.04	-	-	-	-	-	-	0.48	0.47	0	0	1.05	0	0	0	2.57	2.43	0	0	0	0.79	0	0
TRINITY_DN10092_c0_g1	786	587	SODCC	Cu/Zn superoxide dismutase	GO:0005737(cytoplasm);GO:0046872(metal ion binding);GO:0004784(superoxide dismutase activity);GO:0006801(superoxide metabolic process)	[P] Inorganic ion transport and metabolism	K04565	ko04146(Peroxisome);ko05014(Amyotrophic lateral sclerosis (ALS));ko05016(Huntington's disease);ko05020(Prion diseases)	3.83	1.44	2.4	3.87	4.67	1.68	1.09	6.9	5.01	2.34	0.59	1.68	3.09	1.66	2.06	6.28
TRINITY_DN10093_c0_g1	321	99.96	TIC32	-	GO:0005488(binding);GO:0016491(oxidoreductase activity)	[Q] Secondary metabolites biosynthesis, transport and catabolism	-	-	1.98	4.91	4.29	5.5	1.97	1.9	3.37	0	1.92	2.02	5.5	0	0.42	1	3.91	0
TRINITY_DN10093_c0_g2	321	122	TIC32	-	GO:0005488(binding);GO:0016491(oxidoreductase activity)	[Q] Secondary metabolites biosynthesis, transport and catabolism	-	-	0.63	0.68	1.07	3.41	0	0.3	0	0	0	0.14	0.15	0	0	0.43	0.28	0
TRINITY_DN10094_c0_g1	535	336	-	-	-	-	-	-	3.32	0.43	1.11	4.95	5.21	0.39	0.57	6.25	4.77	1.17	1.2	1.27	1.37	0.57	1.22	13.78
TRINITY_DN10095_c0_g1	552	353	-	-	-	-	-	-	1.07	0	0	0	0.15	0	0	0	0	0.22	0	0	0	0.19	0	0
TRINITY_DN10095_c0_g2	551	352	-	-	-	-	-	-	3.64	0.41	0.58	0	1.68	0.32	0	0	3.43	0.54	0.1	0	4.14	0.75	0.05	0
TRINITY_DN10096_c0_g1	1594	1395	SLC25A23	solute carrier family 25 (mitochondrial carrier; adenine nucleotide translocator)	GO:0016021(integral to membrane);GO:0005743(mitochondrial inner membrane);GO:0005509(calcium ion binding);GO:0055085(transmembrane transport)	[F] Nucleotide transport and metabolism	K05863	ko04020(Calcium signaling pathway);ko05012(Parkinson's disease);ko05016(Huntington's disease)	0	0.1	0	0	0	0	0	0.61	0.48	0	0.06	0	0.19	0	0	0
TRINITY_DN10096_c0_g2	1590	1391	SLC25A23	solute carrier family 25 (mitochondrial carrier; adenine nucleotide translocator)	GO:0016021(integral to membrane);GO:0005743(mitochondrial inner membrane);GO:0005509(calcium ion binding);GO:0055085(transmembrane transport)	[F] Nucleotide transport and metabolism	K05863	ko04020(Calcium signaling pathway);ko05012(Parkinson's disease);ko05016(Huntington's disease)	1.39	0.1	0.08	0.02	1.92	0.08	0.03	0	1.59	0.18	0.16	0.42	0.6	0.4	0.22	0
TRINITY_DN10097_c0_g1	249	54.65	-	-	-	[R] General function prediction only	-	-	1.15	3.78	0.34	0	4.63	2.72	1.28	0	2.42	2.75	0	0	12.84	4.14	0.62	0
TRINITY_DN10097_c0_g2	229	39.82	-	-	-	[R] General function prediction only	-	-	3.69	3.62	0.47	0	0.58	11.67	1.98	0	10.4	3.38	1.38	0	0	4.81	2.14	0
TRINITY_DN10098_c0_g1	382	183	-	-	-	-	-	-	0.34	0	0	0	0.75	0	1.03	0.83	0.41	0.1	0	0	0.93	0.14	0	0
TRINITY_DN10098_c0_g2	244	50.74	-	-	-	-	-	-	0	0	0	0	0	0	0.9	0	0	0	0.36	0	3.53	0.19	0.67	0
TRINITY_DN10098_c1_g1	321	122	-	-	-	-	-	-	1.38	0.17	0	0	0	0.3	1.4	0.93	0	0.15	0.3	0	0	0.43	0.14	0
TRINITY_DN10099_c0_g1	330	131	-	-	-	-	-	-	1.28	1.58	1.98	0	1.06	0.42	0.18	4.58	0.86	0	0	0.86	0.99	0	1.05	0
TRINITY_DN10099_c0_g2	325	126	-	-	-	-	-	-	0	0.82	1.33	2.39	0	0.44	1.84	0.8	0	2.26	0.44	0	0	0.28	0	0
TRINITY_DN1009_c0_g1	511	312	-	-	-	-	-	-	2.29	1.06	0.24	2.78	4.94	1.25	2.66	2.79	3.99	0.57	0.23	20.5	2.19	1.67	0.44	0
TRINITY_DN10100_c0_g1	758	559	Cript	-	GO:0030054(cell junction);GO:0005737(cytoplasm)	[Z] Cytoskeleton	-	-	61.25	11.39	35.81	36.95	70.18	13.7	30.1	30.84	83.44	19.11	18.88	30.87	55.87	18.2	27.7	37.29
TRINITY_DN10100_c0_g2	1244	1003.5	cript	-	GO:0005737(cytoplasm)	[Z] Cytoskeleton	-	-	6.74	1.92	2.8	4.31	5.95	2.13	2.44	2.16	4.82	2.48	1.73	5.39	4.59	2.22	1.92	2.76
TRINITY_DN10101_c0_g1	1242	1043	CA2	carbonic anhydrase	GO:0048046(apoplast);GO:0031969(chloroplast membrane);GO:0009570(chloroplast stroma);GO:0009535(chloroplast thylakoid membrane);GO:0005829(cytosol);GO:0004089(carbonate dehydratase activity);GO:0008270(zinc ion binding);GO:0015976(carbon utilization);GO:0042742(defense response to bacterium)	[P] Inorganic ion transport and metabolism	K01673	ko00910(Nitrogen metabolism)	23.4	14.58	5	20.59	13.13	12.06	0.9	1.36	15.65	10.23	2.63	0	24.55	11.98	0.93	0.04
TRINITY_DN10102_c0_g1	525	326	-	-	-	-	-	-	2	0.32	0.11	0.16	3.11	0.17	0.2	0.87	2.02	0.22	0.11	1.72	2.04	0.53	0.1	0
TRINITY_DN10103_c0_g1	2133	1934	-	-	-	-	-	-	0.96	0.18	0.22	1	0.96	0.37	0.28	1.76	0.62	0.43	0.15	1.35	0.83	0.22	0.29	0
TRINITY_DN10104_c0_g1	224	36.47	-	-	-	-	-	-	0	0	0	0	0	0	0	0	0	0	0	33.84	1.01	0	0.47	0
TRINITY_DN10104_c0_g2	224	36.47	-	-	-	-	-	-	0	0	0	3.8	0	0	0	0	0	0	0	0	0	0	0	0
TRINITY_DN10104_c0_g3	224	36.47	-	-	-	-	-	-	0	0.57	0	5.7	0	0	0	0	0.52	0	0	0	0	0	0	0
TRINITY_DN10105_c0_g1	668	469	-	-	-	-	-	-	1.7	0.22	0.55	0.59	0	0.63	0.45	2.06	1.49	0.53	0.31	0	0.98	0.3	0.33	0
TRINITY_DN10106_c0_g1	297	98.01	-	-	-	-	-	-	0.64	0.84	1.52	0	0	0.19	0.43	1.93	0.38	1.09	0.37	0	0	1.78	0.52	0
TRINITY_DN10107_c0_g1	260	63.71	-	-	-	-	-	-	0	1.62	0	9.24	0	0	0	0	0	0	0.57	13.38	0	0	0.8	0
TRINITY_DN10108_c0_g1	1389	1190	BHLH81	-	GO:0005634(nucleus);GO:0003677(DNA binding);GO:0006355(regulation of transcription, DNA-dependent);GO:0006351(transcription, DNA-dependent)	-	-	-	17.98	11.94	30.19	58.18	27.49	12.31	25.8	58.18	17.38	11.99	11.16	65.17	17.12	10.75	16.65	84.87
TRINITY_DN10109_c0_g1	408	209	-	-	-	-	-	-	0	0.1	0	0.33	0.55	0.18	0	0.09	0.91	0.34	0	0	0	0.17	0.24	0
TRINITY_DN10109_c0_g2	400	201	-	-	-	-	-	-	0.52	0.1	0	2.59	0	0	0	0	0.37	0	0	8.93	0	0	0	0
TRINITY_DN1010_c0_g1	225	37.13	-	-	-	-	-	-	1.7	0.56	13.5	21.46	0	0.5	5.73	16.82	0	0	2.96	8.46	1.99	0	8.25	18.14
TRINITY_DN10110_c0_g1	779	580	-	-	-	-	-	-	147.21	38.38	332.13	265.55	106.3	34.23	161.39	247.17	155.21	48.43	54.68	369.09	103.76	39.88	101.31	329.88
TRINITY_DN10111_c0_g1	567	368	-	-	-	-	-	-	4.15	0.96	2.79	5.67	3.43	0.4	3.75	8.55	7.15	0.78	0.53	9.87	3.55	0.57	2.43	0.81
TRINITY_DN10111_c0_g2	535	336	-	-	-	-	-	-	32.94	5.97	13.9	40.02	33.73	12.68	14.31	24.93	31.56	6.81	7.8	55.09	14.74	9.62	10.33	90.92
TRINITY_DN10111_c0_g3	946	747	-	-	-	-	-	-	0.61	0.05	0.15	1.16	0.09	0.39	0.8	2.75	0.6	0.27	0	6.23	0.33	0.26	0.31	8.66
TRINITY_DN10112_c0_g1	509	310	-	-	-	-	-	-	2.74	0.99	0.99	5.4	3.86	0.4	1.99	1.87	3.52	1.88	0.15	4.52	2.06	2.95	0.19	0
TRINITY_DN10113_c0_g1	222	35.18	-	-	-	-	-	-	0	0.59	0	0	0	0	0	7.53	0	0.01	6.24	0	0	1.98	0	2.99
TRINITY_DN10113_c0_g2	220	33.9	-	-	-	-	-	-	19.84	0	11.5	9.2	15.62	5.48	1.26	0	20.01	5.77	0	11.25	6.53	0	4.02	0
TRINITY_DN10114_c0_g1	931	732	Mdp1	-	GO:0046872(metal ion binding);GO:0004725(protein tyrosine phosphatase activity)	[R] General function prediction only	-	-	13.52	3.55	6.87	11	10.32	3.58	3.71	4.68	16.79	4.62	2.87	0	14.28	2.96	1.9	0
TRINITY_DN10114_c0_g2	918	719	Mdp1	-	GO:0046872(metal ion binding);GO:0004725(protein tyrosine phosphatase activity)	[R] General function prediction only	-	-	0	0	0	0	5.35	0.08	3.74	0	0	0	0	2	0	1.27	2.94	16.45
TRINITY_DN10115_c0_g1	494	295	-	-	-	-	-	-	1.14	0	0.13	0	0.31	0.15	0.07	1.41	0.33	0	0	0	2.03	0	0	0
TRINITY_DN10115_c0_g2	217	32.04	-	-	-	-	-	-	0	0	0	0	0	0.38	0	0	2.82	0	0.57	0	0.27	1.09	0	0
TRINITY_DN10116_c0_g1	525	326	-	-	-	-	-	-	9.54	0.25	0	0	11.51	0.11	0	0	10.58	0.33	0	0	1.3	0.27	0	0
TRINITY_DN10117_c0_g1	645	364.6	LBD25	carbamoyl-phosphate synthase large subunit	-	-	K01955	ko00240(Pyrimidine metabolism);ko00250(Alanine, aspartate and glutamate metabolism)	0	0.85	0.75	0.93	3.24	0.09	0.27	1.22	0.68	0.31	0.94	0	0.62	0	0.15	0
TRINITY_DN10119_c0_g1	1047	848	-	-	-	-	-	-	1.31	1.24	0.18	1.25	1.06	0.77	0.2	1.43	1.87	1.05	0.3	0	1.22	0.7	0.4	0
TRINITY_DN1011_c0_g1	506	307	PCMP-E5	-	GO:0005739(mitochondrion);GO:0005488(binding)	[R] General function prediction only	-	-	0.48	0.07	0.42	0	0	0	0.83	2.22	0.92	0	0.3	0	0.18	0.28	0.28	0
TRINITY_DN10120_c0_g1	416	217	-	-	-	[V] Defense mechanisms	-	-	3	0.19	0	0	0.85	0.09	0	3.84	5.56	0.33	0.08	0	1.44	1.2	0.31	0
TRINITY_DN10120_c1_g1	1145	946	-	-	-	-	-	-	2.51	0.46	0.39	0	0.1	0.1	0.27	0	1.28	0.45	0.41	0	0.58	0.88	0.36	0
TRINITY_DN10121_c0_g1	1018	819	-	-	-	-	-	-	42.5	16.45	22.24	18.4	54.95	17.95	25.74	18.79	59.19	18.36	13.98	24.17	43.22	18.74	16.98	23.41
TRINITY_DN10123_c0_g1	236	44.76	-	-	-	-	-	-	0.94	0	1.66	0	0	0.83	0	0	0	0	0	10.03	0	0	0	0
TRINITY_DN10123_c0_g2	267	69.78	-	-	-	-	-	-	0	0	0	0	0	0	0	8.15	0	0	0.38	0	0.79	0.29	0	0
TRINITY_DN10123_c0_g3	254	58.7	-	-	-	-	-	-	0.36	0.35	0	7.08	0	0	0	0	0	0	0.48	0	0	0	0.29	0
TRINITY_DN10124_c0_g1	1650	1439.53	-	-	-	[Z] Cytoskeleton	-	-	78.69	8.37	12.78	8.61	68.35	8.63	18.71	16.98	104.59	7.79	15.47	15.16	41.03	12.91	12.78	9.33
TRINITY_DN10125_c0_g1	406	207	-	-	-	-	-	-	0.81	0	0	0	0	0.27	0.92	0.82	0	0.69	0	0	0	0.34	0.74	0
TRINITY_DN10125_c1_g1	443	244	-	-	-	-	-	-	0.09	0.25	0.46	0	1.13	0.46	0.09	0.62	0.77	0.22	0	0.74	0	0.29	0.77	0
TRINITY_DN10126_c0_g1	1155	914.94	SYN3	cohesin complex subunit SCC1	GO:0000228(nuclear chromosome);GO:0005730(nucleolus);GO:0051301(cell division);GO:0007059(chromosome segregation);GO:0009561(megagametogenesis);GO:0007067(mitosis);GO:0009555(pollen development)	[D] Cell cycle control, cell division, chromosome partitioning	K06670	ko04110(Cell cycle);ko04111(Cell cycle - yeast)	1.3	0.26	0.19	3.1	1.97	0.19	0.49	2.96	2.36	0.24	0.08	4.72	0.66	0.1	0.21	0
TRINITY_DN10127_c0_g1	3306	3107	kif6	kinesin family member 2/24	GO:0005813(centrosome);GO:0005874(microtubule);GO:0005524(ATP binding);GO:0003777(microtubule motor activity);GO:0007018(microtubule-based movement);GO:0006810(transport)	[Z] Cytoskeleton	K10393	-	43.88	12.91	8.63	7.37	36.37	14.09	12.75	5.53	56.06	16.94	9.57	4.23	39.5	15.05	11.03	1.73
TRINITY_DN10128_c0_g1	230	40.51	-	-	-	-	-	-	2.59	1.02	0	0	0	2.29	0	0	6.05	0	0	0	0	0.43	0	70.66
TRINITY_DN10129_c0_g1	436	237	-	-	-	-	-	-	1.6	0	0.94	0	0.19	0.16	0.54	1.52	1.03	0.38	0.08	0	1.71	0.07	0.65	0
TRINITY_DN10130_c0_g1	312	113	-	-	-	-	-	-	2.98	0.37	0.99	2.45	0	0	0.38	0	1.83	0.32	0.32	0	1.31	0.31	0	0
TRINITY_DN10130_c0_g2	202	23.55	-	-	-	-	-	-	0	0	0	0	9.78	0	0	0	0	0	0	0	2.35	0	0	0
TRINITY_DN10131_c0_g1	1169	970	-	-	-	-	-	-	0.52	0.55	0.34	0.73	0.33	1.38	0.97	0.96	0.29	0.75	0.28	2.2	0.36	0.34	0.46	0
TRINITY_DN10132_c0_g1	327	128	-	-	-	-	-	-	0.82	0	0	0	1.08	0.73	0	0	0.88	0.28	0	0	3.02	0.68	0	0
TRINITY_DN10133_c0_g1	558	359	-	-	-	-	-	-	1.82	0.11	0	0.68	0.06	0.93	0.36	0.69	0.89	0.35	0.2	0	1.13	0.48	0.05	0
TRINITY_DN10136_c0_g1	225	37.13	-	-	-	-	-	-	1.74	0.56	1.24	0	6.46	0.5	0	0	4.3	0.48	1.16	0	3.64	0.94	1.38	0
TRINITY_DN10136_c0_g2	361	144.15	F42G9.1	-	GO:0008287(protein serine/threonine phosphatase complex);GO:0046872(metal ion binding);GO:0004722(protein serine/threonine phosphatase activity);GO:0006470(protein dephosphorylation)	[R] General function prediction only	-	-	42.51	4.18	1.89	15.88	48.69	6.48	4.93	13.17	80.22	6.03	4.93	7.62	46	3.46	5.03	0
TRINITY_DN10136_c0_g3	244	50.74	-	-	-	-	-	-	19.98	3.76	1.1	7.85	27.39	3.68	5.03	9.38	35.85	3	3.2	3.54	30.34	3.09	2.23	0
TRINITY_DN10138_c0_g1	319	120	-	-	-	-	-	-	1.69	0.34	3.93	0	2.91	0.82	0.89	0.63	2.26	1.19	0.15	0	0	1.6	0.71	12.1
TRINITY_DN10138_c0_g2	325	126	-	-	-	-	-	-	0.99	0	0.65	0	1.36	0.26	0	0	1.42	0.42	0	0	0	0	0	0
TRINITY_DN10138_c0_g3	319	120	-	-	-	-	-	-	1.05	0.52	0	0	0.27	0	0	0	1.12	0	0	0	1.23	0	0	0
TRINITY_DN10139_c0_g1	244	50.74	-	-	-	[R] General function prediction only	-	-	0	0.81	0	3.07	0	1.1	0	1.84	0.35	0	0	0	1.43	0.34	0	0
TRINITY_DN1013_c0_g1	212	29.05	CPX	coproporphyrinogen III oxidase	GO:0048046(apoplast);GO:0009570(chloroplast stroma);GO:0004109(coproporphyrinogen oxidase activity);GO:0042803(protein homodimerization activity);GO:0006783(heme biosynthetic process)	[H] Coenzyme transport and metabolism	K00228	ko00860(Porphyrin and chlorophyll metabolism)	1.45	1.42	0.64	2.98	3.17	1.28	2.2	0	1.95	0	0	0	0	1.2	0	0
TRINITY_DN10140_c0_g1	726	527	Os01g0656200	protein phosphatase	GO:0008287(protein serine/threonine phosphatase complex);GO:0046872(metal ion binding);GO:0004722(protein serine/threonine phosphatase activity);GO:0006470(protein dephosphorylation)	[T] Signal transduction mechanisms	K01090	-	6.82	3.05	1.73	1.51	4.02	0.95	2.22	2.26	1.68	6.59	1.67	12.73	4.3	1.29	1.78	18.69
TRINITY_DN10141_c0_g1	232	41.9	-	-	-	-	-	-	0	0	0.89	22.29	0	0	0	0	0	0	0	0	0	0	0	0
TRINITY_DN10141_c0_g2	228	39.14	-	-	-	-	-	-	0	0	0	8.71	0	0	0	0	0	0	0	0	0	0	0	0
TRINITY_DN10141_c0_g3	216	31.43	-	-	-	-	-	-	0	0	0	8.48	0	0	0	0	0	0	0	0	0	0	0	0
TRINITY_DN10143_c0_g1	358	159	-	-	-	-	-	-	3.44	0.65	0.23	2.29	0.87	1.64	0.94	12.62	0.59	1.9	1.84	0	0	1.86	1.39	0
TRINITY_DN10144_c0_g1	321	122	-	-	-	-	-	-	0.52	0	0.3	0.71	2.26	0.3	0	0	0.62	0	0	0	0.45	0	0.14	0
TRINITY_DN10144_c1_g1	336	137	-	-	-	-	-	-	1.53	0	0.14	0	3.7	0	0	0.14	3.58	0	0	0	0	0	0	0
TRINITY_DN10145_c0_g1	477	182.97	-	alcohol dehydrogenase	-	[Q] Secondary metabolites biosynthesis, transport and catabolism	K00001	ko00010(Glycolysis / Gluconeogenesis);ko00071(Fatty acid metabolism);ko00350(Tyrosine metabolism);ko00624(1- and 2-Methylnaphthalene degradation);ko00641(3-Chloroacrylic acid degradation);ko00830(Retinol metabolism);ko00980(Metabolism of xenobiotics by cytochrome P450);ko00982(Drug metabolism - cytochrome P450)	0.75	3.29	1.4	3.46	0	4.78	12.41	0	0.56	6.61	3.69	0	9.11	0.91	5.57	0
TRINITY_DN10147_c0_g1	901	686.61	-	-	-	-	-	-	7.76	0	0	0	13.42	0.05	0	0	7.22	0.03	0	1.78	6.2	0.26	0	0
TRINITY_DN10148_c0_g1	2721	2522	B'ETA	protein phosphatase 2 (formerly 2A), regulatory subunit B'	GO:0005829(cytosol);GO:0005634(nucleus);GO:0000159(protein phosphatase type 2A complex);GO:0005488(binding);GO:0008601(protein phosphatase type 2A regulator activity);GO:0007165(signal transduction)	[T] Signal transduction mechanisms	K11584	ko04113(Meiosis - yeast);ko04114(Oocyte meiosis);ko04310(Wnt signaling pathway)	0.83	0.43	0.42	0	1.63	0.42	1.27	0.85	1.2	0.26	0.13	3.97	1.49	0.73	0.5	0
TRINITY_DN10148_c0_g2	2594	2395	B'ETA	protein phosphatase 2 (formerly 2A), regulatory subunit B'	GO:0005829(cytosol);GO:0005634(nucleus);GO:0000159(protein phosphatase type 2A complex);GO:0005488(binding);GO:0008601(protein phosphatase type 2A regulator activity);GO:0007165(signal transduction)	[T] Signal transduction mechanisms	K11584	ko04113(Meiosis - yeast);ko04114(Oocyte meiosis);ko04310(Wnt signaling pathway)	16.05	4.73	3.8	6.69	14.34	4.49	5.13	7.88	18.08	4.94	4.25	11.12	12.73	4.69	5.93	4.48
TRINITY_DN10149_c0_g1	604	405	-	pyruvate kinase	GO:0009507(chloroplast);GO:0005524(ATP binding);GO:0000287(magnesium ion binding);GO:0030955(potassium ion binding);GO:0004743(pyruvate kinase activity);GO:0006096(glycolysis)	[G] Carbohydrate transport and metabolism	K00873	ko00010(Glycolysis / Gluconeogenesis);ko00230(Purine metabolism);ko00620(Pyruvate metabolism);ko00710(Carbon fixation in photosynthetic organisms);ko04930(Type II diabetes mellitus)	2.01	0	0.11	0	0.8	0.93	0.58	0	0.6	0	0.16	0	1.77	1.07	0.25	0
TRINITY_DN10149_c0_g2	604	405	-	pyruvate kinase	GO:0009507(chloroplast);GO:0005524(ATP binding);GO:0000287(magnesium ion binding);GO:0030955(potassium ion binding);GO:0004743(pyruvate kinase activity);GO:0006096(glycolysis)	[G] Carbohydrate transport and metabolism	K00873	ko00010(Glycolysis / Gluconeogenesis);ko00230(Purine metabolism);ko00620(Pyruvate metabolism);ko00710(Carbon fixation in photosynthetic organisms);ko04930(Type II diabetes mellitus)	0.22	0.56	0.11	0	0	0.27	0	0	1.5	1.01	0.16	0	1.78	0	0	0
TRINITY_DN1014_c0_g1	267	69.78	-	-	-	-	-	-	0.9	0.3	0.27	0	0.66	0.8	0	9.77	1.08	0	0	0	4.23	0.25	0.49	0
TRINITY_DN10150_c0_g1	538	339	-	-	-	-	-	-	1.71	0.37	0	1.48	1.72	1.15	0.6	0.39	1.28	0.59	0.11	0	0.44	0.69	0.61	0
TRINITY_DN10150_c0_g2	242	49.21	-	-	-	-	-	-	1.88	2.93	2.26	0	12.45	1.13	1.95	0	5	3.14	1.11	0	5.19	0.89	1.67	0
TRINITY_DN10151_c0_g1	404	205	-	-	-	-	-	-	1.64	0.81	0.36	0.42	0.22	0	0	0.18	2.3	0	0.09	0	0.36	0.51	0.58	0
TRINITY_DN10151_c1_g1	227	38.47	-	-	-	-	-	-	1.64	0	0.48	10.81	0	0	0	0	0	0.46	0	0	0	0	0.44	0
TRINITY_DN10153_c0_g1	321	122	-	-	-	-	-	-	1.03	0.51	1.37	3.69	1.13	0	0.35	0	1.24	0	0.6	0	0	0.29	0.28	0
TRINITY_DN10153_c1_g1	296	97.02	-	-	-	-	-	-	2.38	0.21	2.49	0.71	1.9	0	0	0	1.55	0	0	2.54	0	0.9	0.18	0
TRINITY_DN10154_c0_g1	730	531	-	-	-	-	-	-	0	0	0.17	0	0.43	0	0	0	0.53	0.27	0.07	1.94	0.41	0	0	0
TRINITY_DN10154_c0_g2	842	643	-	-	-	-	-	-	1.63	0.19	0	0	0.07	0.2	0.2	1.18	0	0	0	0	0.38	0.14	0.11	0
TRINITY_DN10155_c0_g1	1442	1243	-	-	-	-	-	-	0.78	0.3	0.15	0.5	0.17	0.19	0.11	0.82	0.41	0.32	0.21	0.72	0.42	0.46	0.24	0
TRINITY_DN10155_c0_g2	521	322	-	-	-	-	-	-	0	0	0	1.36	1.12	0	0.15	0	0	0	0	1.26	0.9	0	0.09	0
TRINITY_DN10156_c0_g1	482	283	-	-	-	-	-	-	1.86	0	0	0	0.98	0	0	1.61	0.73	0.94	0	0	1.04	0.12	0	0
TRINITY_DN10157_c0_g1	659	460	PERK2	-	GO:0016021(integral to membrane);GO:0005886(plasma membrane);GO:0005524(ATP binding);GO:0004674(protein serine/threonine kinase activity);GO:0004872(receptor activity)	[T] Signal transduction mechanisms	-	-	0.09	1.52	5.49	0	0.2	1.62	6.75	0.25	0.12	0.31	0.72	0	0.08	2.42	2.7	0.05
TRINITY_DN10158_c0_g1	270	72.44	-	-	-	-	-	-	0	0	0	0	0	0	0	0	0.24	0	0	0	0	0.48	0.3	0
TRINITY_DN10158_c0_g2	243	49.97	-	-	-	-	-	-	0	0.41	0	0.69	0	0.21	0.85	0	0	0.67	0	0	0	0	0	0
TRINITY_DN10158_c0_g3	352	153	-	-	-	-	-	-	1.1	0	0	0	0	0.42	0	0	0.26	0.71	0.12	0	0.48	0	0.42	0
TRINITY_DN10159_c0_g1	269	71.55	-	-	-	-	-	-	0.29	0	0	0	0.32	0.26	0	0	3.16	0	0.26	0	2.58	1.7	1.19	0
TRINITY_DN1015_c0_g1	201	23.03	-	-	-	-	-	-	0	0	0	0	15.99	0	0	0	0.82	0	0	0	0	0	0	0
TRINITY_DN10160_c0_g1	632	433	-	-	-	-	-	-	0	0	0	0	0	0	0	0	1.13	0.08	0	0	0	0	0	0
TRINITY_DN10160_c0_g2	417	218	-	-	-	-	-	-	0.1	0.09	0	0	0	0.09	1.07	0	0.69	0.01	0.17	0	0.34	0.32	0.31	7.92
TRINITY_DN10160_c0_g3	412	213	-	-	-	-	-	-	0.2	0	0.52	0	0.86	0	0.3	0.36	0	0	0.09	0	0.95	0.33	0.56	0
TRINITY_DN10161_c0_g1	469	270	At4g34480	-	GO:0005618(cell wall);GO:0005576(extracellular region);GO:0043169(cation binding);GO:0042973(glucan endo-1,3-beta-D-glucosidase activity);GO:0005975(carbohydrate metabolic process);GO:0007047(cellular cell wall organization)	-	-	-	0.16	2.67	4.26	2.76	0	1.72	6.38	5.75	0.56	2.77	2.51	3.57	0	1.16	11.86	0
TRINITY_DN10162_c0_g1	317	118	-	-	-	-	-	-	3.03	0.35	0	0	1.76	0.16	0	0	0.32	0	0	0	1.09	0.29	0	0
TRINITY_DN10162_c1_g1	519	320	-	-	-	-	-	-	1.38	0.77	0.29	0	1.01	0.23	0.07	0	1.65	0.22	0	0	1.27	0.22	0.32	0
TRINITY_DN10163_c0_g1	303	104	-	S-(hydroxymethyl)glutathione dehydrogenase / alcohol dehydrogenase	GO:0005737(cytoplasm);GO:0004022(alcohol dehydrogenase (NAD) activity);GO:0051903(S-(hydroxymethyl)glutathione dehydrogenase activity);GO:0008270(zinc ion binding);GO:0006069(ethanol oxidation)	[Q] Secondary metabolites biosynthesis, transport and catabolism	K00121	ko00010(Glycolysis / Gluconeogenesis);ko00071(Fatty acid metabolism);ko00350(Tyrosine metabolism);ko00624(1- and 2-Methylnaphthalene degradation);ko00641(3-Chloroacrylic acid degradation);ko00680(Methane metabolism);ko00830(Retinol metabolism);ko00980(Metabolism of xenobiotics by cytochrome P450);ko00982(Drug metabolism - cytochrome P450)	0.93	0	2.14	0	3.32	0.41	0	0	0	0.51	0	0	1.77	0.87	0.16	0
TRINITY_DN10163_c0_g2	303	104	-	S-(hydroxymethyl)glutathione dehydrogenase / alcohol dehydrogenase	GO:0005737(cytoplasm);GO:0004022(alcohol dehydrogenase (NAD) activity);GO:0051903(S-(hydroxymethyl)glutathione dehydrogenase activity);GO:0008270(zinc ion binding);GO:0006069(ethanol oxidation)	[Q] Secondary metabolites biosynthesis, transport and catabolism	K00121	ko00010(Glycolysis / Gluconeogenesis);ko00071(Fatty acid metabolism);ko00350(Tyrosine metabolism);ko00624(1- and 2-Methylnaphthalene degradation);ko00641(3-Chloroacrylic acid degradation);ko00680(Methane metabolism);ko00830(Retinol metabolism);ko00980(Metabolism of xenobiotics by cytochrome P450);ko00982(Drug metabolism - cytochrome P450)	0.69	0	0	4.83	0	0.84	1.43	0	0.54	0	0	0	0	1.31	0	0
TRINITY_DN10163_c0_g3	298	99	-	S-(hydroxymethyl)glutathione dehydrogenase / alcohol dehydrogenase	GO:0005737(cytoplasm);GO:0004022(alcohol dehydrogenase (NAD) activity);GO:0051903(S-(hydroxymethyl)glutathione dehydrogenase activity);GO:0008270(zinc ion binding);GO:0006069(ethanol oxidation)	[Q] Secondary metabolites biosynthesis, transport and catabolism	K00121	ko00010(Glycolysis / Gluconeogenesis);ko00071(Fatty acid metabolism);ko00350(Tyrosine metabolism);ko00624(1- and 2-Methylnaphthalene degradation);ko00641(3-Chloroacrylic acid degradation);ko00680(Methane metabolism);ko00830(Retinol metabolism);ko00980(Metabolism of xenobiotics by cytochrome P450);ko00982(Drug metabolism - cytochrome P450)	0	0	0	0	0	0	0	2.87	0	0	0	0	0	0	0	0
TRINITY_DN10164_c0_g1	597	398	-	-	-	-	-	-	1.37	0.21	0.05	0	2.95	0.79	0.05	0	0.28	0.18	0.09	0	2.32	0.7	0.09	0
TRINITY_DN10166_c0_g1	356	157	-	-	-	-	-	-	10.44	0.26	0.35	1.32	8.07	1.07	1.49	1.45	8.88	1.7	0.93	0	7.05	1.33	2.17	0
TRINITY_DN10167_c0_g1	232	41.9	-	-	-	-	-	-	11.04	4.43	3.54	0	24.72	3.99	3.05	2.71	36.43	2.98	1.31	0	14.08	1.25	0.41	0
TRINITY_DN10167_c1_g1	232	41.9	-	-	-	-	-	-	5.25	6.51	5.27	0.46	5.49	0	4.15	22.92	14.69	4.58	3.97	8.55	12.95	5.08	4.11	0
TRINITY_DN10168_c0_g1	465	266	-	-	-	-	-	-	0	0	0	0	0.24	0	0	0	0	0	0	0	0	0	0	0
TRINITY_DN10168_c0_g2	247	53.07	-	-	-	-	-	-	0.79	0	3.15	0	0.99	3.15	1.6	0	1.42	0.67	0	0	2.08	2.3	1.28	0
TRINITY_DN10168_c0_g3	279	80.67	-	-	-	-	-	-	1.3	0.51	1.15	0	0.57	0	0	0	0.23	0	0	0	0	0	0.21	23.22
TRINITY_DN10169_c0_g1	417	218	-	-	-	-	-	-	0.87	0	0	0	1.58	0.6	0.29	0.69	2.42	0.08	0.34	0	0	0.56	0.16	0
TRINITY_DN1016_c0_g1	221	34.54	-	-	-	-	-	-	2.43	0	0	0	4.67	1.08	0.62	0	1.09	2.58	0	0	2.67	0.5	0	0
TRINITY_DN10170_c0_g1	1528	1329	PCMP-H24	-	GO:0005488(binding)	[R] General function prediction only	-	-	0.76	0.17	0.42	0.78	0.24	0.35	0.64	2.41	1.13	0.13	0.23	0.81	0.5	0.35	0.58	0
TRINITY_DN10170_c1_g1	670	471	-	-	-	-	-	-	0.22	0.35	0.75	0.51	0.93	0.32	0.36	0.88	0.76	0.23	0.27	0	0.31	0.26	0.33	0
TRINITY_DN10171_c0_g1	449	250	-	-	-	-	-	-	0	0	0	2.08	3.91	0.3	0	0	0	0	0.07	0	0	0	0	0
TRINITY_DN10171_c0_g2	455	256	-	-	-	-	-	-	1.23	1.21	0.22	0	0.77	0	0	0	0.74	0.77	0	6.92	0.86	0.48	0	0
TRINITY_DN10172_c0_g1	1106	907	FCF1	-	GO:0005730(nucleolus);GO:0006364(rRNA processing)	[R] General function prediction only	K07158	-	83.4	29.66	77.27	212.13	81.91	29.12	67.34	140.88	104.82	38.3	30.07	326.77	65.66	35.04	49.5	99.53
TRINITY_DN10173_c0_g1	276	77.89	-	-	-	-	-	-	0	2.38	0	0	1.77	0.24	1.37	0	0	0	0.47	0	5.44	1.34	0	0
TRINITY_DN10174_c0_g1	234	43.32	-	-	-	-	-	-	0.49	0	0	3.6	0	1.72	0.49	0.44	0.44	0.41	0	0	4.26	1.21	0.79	4.86
TRINITY_DN10175_c0_g1	1584	1385	WNK1	serine/threonine-protein kinase WNK1	GO:0005524(ATP binding);GO:0004674(protein serine/threonine kinase activity)	[R] General function prediction only	K12132	ko04712(Circadian rhythm - plant)	0	0.08	0	3.9	0	0.18	1.16	0	0	0.78	0	0	0	0.9	1.12	0
TRINITY_DN10175_c0_g2	2270	2071	WNK1	serine/threonine-protein kinase WNK1	GO:0005524(ATP binding);GO:0004674(protein serine/threonine kinase activity)	[R] General function prediction only	K12132	ko04712(Circadian rhythm - plant)	7.91	1.28	2.06	4.74	7.39	1.72	2.87	6.05	7.35	1.29	2.07	1.78	4.83	1.16	2.51	2.34
TRINITY_DN10177_c0_g1	254	58.7	-	actin related protein 2/3 complex, subunit 1A/1B	-	-	K05757	ko04666(Fc gamma R-mediated phagocytosis);ko04810(Regulation of actin cytoskeleton);ko05100(Bacterial invasion of epithelial cells);ko05130(Pathogenic Escherichia coli infection);ko05131(Shigellosis)	3.94	1.05	0.95	0	2.75	1.27	0	0	0	0.3	0	0	0.31	0.3	0	0
TRINITY_DN10178_c0_g1	1711	1512	LWD1	WD repeat-containing protein 68	GO:0005634(nucleus);GO:0044212(transcription regulatory region DNA binding);GO:0009718(anthocyanin biosynthetic process);GO:0043153(entrainment of circadian clock by photoperiod);GO:0048573(photoperiodism, flowering);GO:0048511(rhythmic process)	[S] Function unknown	K11805	-	0.74	0.69	0.69	3.89	0	0.44	0.21	2.75	1.06	0.44	0.72	11.58	0.76	0.94	1.59	7.73
TRINITY_DN10178_c0_g2	1728	1527.87	LWD1	WD repeat-containing protein 68	GO:0005634(nucleus);GO:0044212(transcription regulatory region DNA binding);GO:0009718(anthocyanin biosynthetic process);GO:0043153(entrainment of circadian clock by photoperiod);GO:0048573(photoperiodism, flowering);GO:0048511(rhythmic process)	[S] Function unknown	K11805	-	0.33	3.21	6.46	11.78	0.76	1.09	5.83	5.88	0.55	1.71	1.65	1.05	0.28	1.08	4.57	58.53
TRINITY_DN10178_c0_g3	1710	1511	LWD1	WD repeat-containing protein 68	GO:0005634(nucleus);GO:0044212(transcription regulatory region DNA binding);GO:0009718(anthocyanin biosynthetic process);GO:0043153(entrainment of circadian clock by photoperiod);GO:0048573(photoperiodism, flowering);GO:0048511(rhythmic process)	[S] Function unknown	K11805	-	11.24	5.16	6.52	77.05	21.78	8.11	7.94	74.33	13.03	5.49	4.54	121.11	12.65	8.25	13.18	72.75
TRINITY_DN10178_c0_g4	1529	1330	LWD1	WD repeat-containing protein 68	GO:0005634(nucleus);GO:0044212(transcription regulatory region DNA binding);GO:0009718(anthocyanin biosynthetic process);GO:0043153(entrainment of circadian clock by photoperiod);GO:0048573(photoperiodism, flowering);GO:0048511(rhythmic process)	[S] Function unknown	K11805	-	0	0	0	1.02	0	0	0	0	0	0	0	0	0	0	0	36.76
TRINITY_DN10178_c2_g1	283	84.42	-	-	-	-	-	-	14.33	2.51	4.21	5.12	37.39	0.64	2.63	2.1	33.86	2.62	0	0	36.99	2.23	1.6	0
TRINITY_DN10178_c2_g2	214	30.23	-	-	-	-	-	-	19.21	2.14	1.19	0	76.4	4	9.8	0	51.38	1.34	3.67	0	26.18	2.7	2.42	0.7
TRINITY_DN10178_c2_g3	218	32.65	-	-	-	-	-	-	148.58	13.63	14.73	3.73	145.65	17.97	31.68	0.95	189.88	32.36	7.25	0	85.12	17.85	7.72	0
TRINITY_DN10179_c0_g1	788	546.28	-	translation initiation factor eIF-1A	GO:0003743(translation initiation factor activity)	[J] Translation, ribosomal structure and biogenesis	K03236	-	15.24	8.02	19.21	17.35	12.52	13.32	45.24	29.02	21.58	7.63	13.44	34.26	14.29	6.71	17.67	65.45
TRINITY_DN1017_c0_g1	1065	866	UBC24	ubiquitin-conjugating enzyme E2 O	GO:0005524(ATP binding);GO:0004842(ubiquitin-protein ligase activity);GO:0016036(cellular response to phosphate starvation);GO:0055062(phosphate ion homeostasis);GO:0006817(phosphate transport)	[O] Posttranslational modification, protein turnover, chaperones	K10581	ko04120(Ubiquitin mediated proteolysis)	1.86	3.55	6.04	0.18	1.86	3.79	3.5	0.19	3.91	2.2	2.26	2.34	3.92	2.5	2.99	0
TRINITY_DN10180_c0_g1	791	592	-	-	-	-	-	-	0.41	0.31	0.03	0	0	0.46	0.25	0	0.14	0.3	0.12	0	0.7	0	0.15	0
TRINITY_DN10180_c0_g2	556	357	-	-	-	[Z] Cytoskeleton	-	-	0.27	0.12	0	0	0.9	0.22	0	0	0.45	0	0	0	1.43	0.05	0.17	0
TRINITY_DN10181_c0_g1	1725	1526	FEN1	-	GO:0005789(endoplasmic reticulum membrane);GO:0016021(integral to membrane);GO:0009922(fatty acid elongase activity);GO:0030497(fatty acid elongation);GO:0030148(sphingolipid biosynthetic process);GO:0016192(vesicle-mediated transport)	[I] Lipid transport and metabolism	-	-	3.73	0.49	0.23	0.4	3.33	0.54	0.24	0.07	4.14	0.56	0.17	0.24	1.84	0.29	0.31	0
TRINITY_DN10182_c0_g1	483	273.85	Os01g0911100	-	GO:0005634(nucleus);GO:0005524(ATP binding);GO:0008026(ATP-dependent helicase activity);GO:0003723(RNA binding);GO:0000184(nuclear-transcribed mRNA catabolic process, nonsense-mediated decay);GO:0006364(rRNA processing)	[T] Signal transduction mechanisms	-	-	9.77	4.5	4.79	15.46	9.15	8.48	15.41	18.8	21.89	4.23	8.6	15.17	17.5	6.21	17.84	0
TRINITY_DN10183_c0_g1	232	41.9	-	-	-	-	-	-	1.02	0	0	0	0	0	0.05	0	0.16	0	0	0	0.43	0	0	0
TRINITY_DN10183_c0_g2	554	355	-	-	-	-	-	-	1.48	0.23	0.1	0	0.13	0.21	0.41	0	1.1	0.2	0	0	1.2	0.54	0.34	0
TRINITY_DN10184_c0_g1	212	29.05	-	-	-	-	-	-	0.72	0	1.28	0	0.79	0	0	0	0	0	0	0	0	0	0	0
TRINITY_DN10184_c0_g2	211	28.47	-	-	-	-	-	-	0	0	0	0	4.04	0	0	0	0	0	0	0	0	0	0	0
TRINITY_DN10185_c0_g1	388	189	-	-	-	-	-	-	0	0	0	0	0	0	0	4.91	0	0	0	0	0	0	0	18.38
TRINITY_DN10187_c0_g1	1003	804	HSFA3	-	GO:0005634(nucleus);GO:0043565(sequence-specific DNA binding);GO:0003700(sequence-specific DNA binding transcription factor activity);GO:0010200(response to chitin);GO:0009408(response to heat)	[K] Transcription	-	-	1.28	0.1	0	0.24	2.03	0.05	0.11	0.99	1.08	0.47	0	4.41	0.37	0.06	0	0
TRINITY_DN10188_c0_g1	366	167	-	-	-	-	-	-	0	0	0	0	0	0	0	0.68	3.82	0	0	9.69	0.99	0	0	7.81
TRINITY_DN10188_c0_g2	366	167	-	-	-	-	-	-	0	0.12	0.33	1.04	0.69	0	0	0	1.15	0	0	0	0.99	0.21	0.1	0
TRINITY_DN10189_c0_g1	2259	2060	PLC2	phospholipase C, delta	GO:0005886(plasma membrane);GO:0005509(calcium ion binding);GO:0004435(phosphatidylinositol phospholipase C activity);GO:0004871(signal transducer activity);GO:0035556(intracellular signal transduction);GO:0016042(lipid catabolic process)	[T] Signal transduction mechanisms	K05857	ko00562(Inositol phosphate metabolism);ko04020(Calcium signaling pathway);ko04070(Phosphatidylinositol signaling system)	14.25	7.11	6.43	14.98	14.98	7.43	11.3	14.88	11.75	7.91	5.27	15.03	14.37	6.56	10.82	9.77
TRINITY_DN10190_c0_g1	1465	1241.92	-	-	-	[R] General function prediction only	-	-	60.88	32.82	28.43	30.61	78.5	32.88	32.14	26.44	46.94	39.73	24.13	40.76	55.63	31.71	17.52	23.26
TRINITY_DN10192_c0_g1	596	397	-	-	-	-	-	-	0.95	4.05	2.01	0	1.16	4.96	2.41	0.19	0	2.78	1.24	0	7.9	1.49	0.9	0
TRINITY_DN10193_c0_g1	1553	1354	-	prolyl 4-hydroxylase	-	[E] Amino acid transport and metabolism	K00472	ko00330(Arginine and proline metabolism)	61.8	24.6	19.54	20.81	37.95	29.51	22.96	31.61	66.01	32.72	16.66	17.7	45.17	20.23	18.51	19.17
TRINITY_DN10194_c0_g1	330	131	-	-	-	-	-	-	6.42	3.46	0.71	0	10.19	3.26	1.46	0	5.32	7.34	0.42	0	3.8	5.57	0.33	0
TRINITY_DN10194_c1_g1	271	73.34	-	-	-	[S] Function unknown	-	-	6.41	1.75	1.34	6.72	11.51	3.81	1.47	0	6.92	2.92	0.86	0	2.25	3.58	1.95	0
TRINITY_DN10195_c0_g1	257	61.18	-	-	-	-	-	-	2.29	0	0.3	0	0.38	0	0.35	0	2.64	0	0	0	4.82	0	0	0
TRINITY_DN10195_c0_g2	257	61.18	-	-	-	-	-	-	1.83	0	0	0	0	0	0	0	5.37	1.16	0	0	0	0	0	0
TRINITY_DN10196_c0_g1	456	257	-	-	-	-	-	-	0.25	0	0.07	0	0.9	0.51	0.33	1.62	2.86	0.49	0.14	0	1.29	0.74	0.4	0
TRINITY_DN10197_c0_g1	2754	2555	gaa1	glycosylphosphatidylinositol transamidase	GO:0042765(GPI-anchor transamidase complex);GO:0016255(attachment of GPI anchor to protein)	[O] Posttranslational modification, protein turnover, chaperones	K05289	ko00563(Glycosylphosphatidylinositol(GPI)-anchor biosynthesis)	15.2	3.33	2.51	6.72	10.11	3.46	4.92	10.58	18.55	3.51	2.79	4.36	13.11	3.94	5.1	7.88
TRINITY_DN10198_c0_g1	477	278	-	-	-	-	-	-	0.91	0.15	0.07	1.12	0	0	0.08	0	1.22	0.58	0.26	0	0	0	0.06	0
TRINITY_DN10199_c0_g1	903	704	-	-	-	-	-	-	0.75	0.53	0.58	0.59	0.78	0.32	1.51	1.72	1.58	0.71	0.21	0.06	1.02	0.52	0.48	2.09
TRINITY_DN101_c0_g1	1172	973	ATL43	-	GO:0016021(integral to membrane);GO:0008270(zinc ion binding)	[O] Posttranslational modification, protein turnover, chaperones	-	-	3.04	1.01	1.35	0	2.2	0.41	1.21	0.14	1.12	0.34	0.61	0	1.11	0.22	0.5	0
TRINITY_DN10200_c0_g1	275	76.97	-	-	-	-	-	-	0	0	0	11.25	0	0.72	0	0	0	1.16	0.95	0	0	1.36	0	0
TRINITY_DN10201_c0_g1	302	103	EFR	-	GO:0016021(integral to membrane);GO:0005524(ATP binding);GO:0005515(protein binding);GO:0004674(protein serine/threonine kinase activity);GO:0019199(transmembrane receptor protein kinase activity);GO:0010204(defense response signaling pathway, resistance gene-independent);GO:0016045(detection of bacterium);GO:0002764(immune response-regulating signaling pathway);GO:0009626(plant-type hypersensiti…	-	K00924	-	1.84	0	0.36	3.7	0.22	0.36	0	0	0	0.35	0	0	4.83	1.01	0.5	0
TRINITY_DN10202_c0_g1	687	488	-	-	-	-	-	-	0.72	0	0.38	0	1.22	0.46	0	0.54	0.64	0.11	0	0	1.28	0.25	0	0
TRINITY_DN10202_c0_g2	474	275	-	-	-	-	-	-	0.59	0.38	0	0	0	0.14	0	0	0.83	0.26	0.27	0	1.81	0	0	0
TRINITY_DN10202_c0_g3	1080	881	-	-	-	-	-	-	0.3	0.26	0	0	1.15	0	0	0	0.78	0	0	0	0	0.14	0.12	0
TRINITY_DN10203_c0_g1	258	62.02	-	-	-	-	-	-	0.29	0.9	1.5	0	0	0	0	0	0	0.29	0	0.72	0	0	0	0
TRINITY_DN10203_c0_g2	387	188	-	-	-	-	-	-	9.97	0.58	2.67	0	5.76	1.78	0.91	0	4.61	1.33	0	0	2.35	0.65	0.45	0
TRINITY_DN10204_c0_g1	572	373	-	-	-	-	-	-	0.23	0.28	0	0	0.49	0.1	0	1.78	1.47	0.1	0.2	0	0.79	0.19	0.05	0
TRINITY_DN10205_c0_g1	249	54.65	-	-	-	-	-	-	0	0	0	0	0	0	0	4.85	0	2.71	0.67	0	0	1.27	0.31	0
TRINITY_DN10206_c0_g1	970	771	-	-	-	-	-	-	0	0.12	0	0.5	0.06	0.14	0	0.81	0	0.13	0	0	0	0.27	0.22	0
TRINITY_DN10206_c0_g2	589	390	-	-	-	-	-	-	0	0.03	0	1.59	0.04	0.14	0	0.19	0	0.06	0.23	0	0	0	0	6.8
TRINITY_DN10206_c0_g3	970	771	-	-	-	-	-	-	0.65	0	0.22	0	0.06	0	0	0	0.51	0.07	0.19	0	0	0	0	0
TRINITY_DN10207_c0_g1	248	53.86	-	-	-	-	-	-	0.78	0	0	0	0	0	0	0	2.45	0	0	0	2.74	0	0	0
TRINITY_DN10208_c0_g1	1183	838.64	-	-	-	-	-	-	1	0.83	0.53	0	0.54	0.38	0.5	3.14	1.29	0.5	0.12	0	2.37	0.55	0.34	0
TRINITY_DN10209_c0_g1	325	126	-	-	-	-	-	-	19.35	7.53	7.07	4.95	3.65	1.03	3.21	4.51	9.87	8.91	9.58	7.84	12.88	3.04	2.97	0
TRINITY_DN1020_c0_g1	302	103	-	-	-	-	-	-	0	0	0	7.74	0	0	0	8.64	0	0	0	10.46	0	0	0	0
TRINITY_DN10210_c0_g1	221	34.54	-	-	-	-	-	-	6.09	0	0	16.05	6	0	0	0	2.18	0	0.53	0	0.53	0	0	0
TRINITY_DN10211_c0_g1	410	211	-	-	-	-	-	-	0.2	0.39	0	0	0	0.97	0	4.76	0	0.76	0.17	1.06	0.35	0.33	1.29	0
TRINITY_DN10212_c0_g1	906	707	-	-	-	-	-	-	0.45	0.06	0.87	15.26	2.54	0.11	0.72	4.69	0.11	0.2	0.21	8.73	0.16	0.15	2.29	4.2
TRINITY_DN10213_c0_g1	215	30.82	-	-	-	-	-	-	2.73	0	0	0	0	1.81	2.07	0	1.22	0	0.59	0	0	0	0	0
TRINITY_DN10213_c1_g1	1323	1124	-	-	-	-	-	-	0.65	0.53	0.13	0.28	0.33	0.41	0.47	0.71	1.54	0.67	0.31	0	1.15	0.56	0.42	0
TRINITY_DN10213_c2_g1	846	647	-	-	-	-	-	-	1.04	1.05	0.06	0	1.25	0.37	0.36	0.23	2.21	0.72	0.57	0	1.14	0.81	0.68	0
TRINITY_DN10214_c0_g1	311	112	-	-	-	-	-	-	0	0	0	4.02	0	0	0	1.01	0	0.32	0.08	0.5	0	0.31	0.3	0
TRINITY_DN10214_c0_g2	311	112	-	-	-	-	-	-	0	0	0	0	0	0.33	0	0	0	0	0.08	0.5	1.65	0	0	0
TRINITY_DN10215_c0_g1	622	423	-	-	-	-	-	-	3.58	0.63	0	0	2.07	0.62	0	0	4.05	0.46	0.17	0	1.7	2.06	0.16	0
TRINITY_DN10216_c0_g1	269	71.55	-	-	-	-	-	-	0.29	0	1.82	0	0.32	0	0	0	2.37	0	0	0	1.8	0	0	0.88
TRINITY_DN10217_c0_g1	302	103	-	-	-	-	-	-	0.41	0	0	0	1.34	0	0	0	1.1	0	0.36	0	1.61	0	0	0
TRINITY_DN10218_c0_g1	371	172	-	-	-	-	-	-	0.49	0	2.81	0	0	2.05	0.25	0	0	0.72	0.43	0	0	0.1	0	0
TRINITY_DN10219_c0_g1	384	185	-	-	-	[I] Lipid transport and metabolism	-	-	0.77	0	0	0	0	0	0.22	0	0	0	0	0	0	0	0	0
TRINITY_DN10219_c0_g2	665	466	-	-	-	[I] Lipid transport and metabolism	-	-	1	0	0	0	3.31	0.12	0.51	0.49	1.05	0	0	0	0.08	0	0	0
TRINITY_DN1021_c0_g1	366	167	-	-	-	-	-	-	0.38	0.12	0	0	0.55	0	0.45	0	1.02	0	0	0	0	0.42	0.41	0
TRINITY_DN1021_c0_g2	219	33.27	RABD1	Rab family, other	GO:0005886(plasma membrane);GO:0032588(trans-Golgi network membrane);GO:0005525(GTP binding);GO:0030742(GTP-dependent protein binding);GO:0080115(myosin XI tail binding);GO:0006888(ER to Golgi vesicle-mediated transport);GO:0015031(protein transport);GO:0007264(small GTPase mediated signal transduction)	[T] Signal transduction mechanisms ;[U] Intracellular trafficking, secretion, and vesicular transport	K07976	-	1.26	0	0	6.77	2.77	0	4.15	0	0	0	0	0	0	0	0.51	0
TRINITY_DN10220_c0_g1	526	327	-	-	-	-	-	-	0.96	1.2	0.23	0	0.56	0.23	0.13	0	1.27	0.93	0.28	0	1.97	0	0.21	0
TRINITY_DN10221_c0_g1	489	290	-	-	-	-	-	-	0	0	0.1	0.66	0	0	0	0	1.69	0	0	0	0	0	0	0
TRINITY_DN10221_c0_g2	551	352	-	-	-	-	-	-	1.68	0.33	0.29	0	1.31	0.34	0.43	2.25	3.38	0.34	0.11	0	1.34	0.15	0.89	0
TRINITY_DN10222_c0_g1	338	139	-	-	-	-	-	-	1.21	0.59	0.53	0	0.94	0	0	0	0.81	0.24	0	0	0	0.13	0	0
TRINITY_DN10222_c0_g2	206	25.67	-	-	-	-	-	-	0.82	0	0	0	1.16	0	0	13.27	0	1.5	0.71	0	0	0	2.65	0
TRINITY_DN10223_c0_g1	257	61.18	-	-	-	-	-	-	0	0	0	0	0	0.3	0	0	0	0	0	0	0.88	0	0	0
TRINITY_DN10223_c0_g2	256	60.35	-	-	-	-	-	-	3.48	0.34	0	0	0.81	0.62	0.35	0.94	8.48	0	0.81	8.55	1.85	0.29	0	0
TRINITY_DN10223_c0_g3	257	61.18	-	-	-	-	-	-	0.34	0	1.82	0	5.22	0	0	0	1.19	0.58	0.4	0	0	1.14	0	0
TRINITY_DN10224_c0_g1	892	642.95	-	-	-	-	-	-	1.91	2.28	0.83	1.54	1.89	1.85	1.15	0.67	3.54	2.97	0.98	2.29	2.45	3.01	1.28	0
TRINITY_DN10225_c0_g1	378	179	-	-	-	-	-	-	0.23	0	1.24	0.87	0.13	0.21	0	7.3	0.63	0.2	0	0	1.44	0	0	0
TRINITY_DN10226_c0_g1	871	672	-	-	-	-	-	-	327.52	163.8	223.33	519.76	388.12	216.13	289.45	485.91	285.17	217.7	154.98	531.03	241.42	221.75	301.38	863.3
TRINITY_DN10227_c0_g1	227	38.47	-	-	-	-	-	-	0	0	0	0	7.2	0	0	0	0	0	0.24	0	0	3.57	0	0
TRINITY_DN10227_c0_g2	227	38.47	-	-	-	-	-	-	0.55	1.12	1.45	0.45	0.58	0	0	0	0.49	1.39	0.24	0	0	0.5	0	0
TRINITY_DN10227_c0_g3	227	38.47	-	-	-	-	-	-	0	3.17	0	0	0	0	1.11	4.92	0	0	0	10.5	0	0	0	14.23
TRINITY_DN10228_c0_g1	225	37.13	-	-	-	-	-	-	0	1.67	3.5	0	0	1	0	8.16	2.54	0	1.48	0	1.99	0.47	0.46	0
TRINITY_DN10229_c0_g1	3192	2755.4	-	-	-	-	-	-	23.41	9.93	5.54	7.71	27.87	11.72	8.24	10.81	25.14	11.29	7.09	5.97	18.49	12.81	10.64	4.54
TRINITY_DN1022_c0_g1	1233	1034	-	-	-	-	-	-	1.22	0.26	0.11	0	0.49	0.14	0.51	0.15	2.66	0.55	0.07	0	1.32	0.67	0.18	0
TRINITY_DN10230_c0_g1	234	43.32	-	-	-	-	-	-	3.4	0	0	0	2.66	0	0	2.18	1.31	0	0	0	0	0	0	0
TRINITY_DN10230_c1_g1	280	81.6	-	-	-	-	-	-	2.32	1.01	0	1.7	0.56	0	0.26	3.02	2.08	0.44	0	0	0.45	0	0	0
TRINITY_DN10231_c0_g1	297	98.01	-	-	-	-	-	-	0.64	0	0	0	2.58	0	0.22	1.55	0.77	0	0	0	0.38	0	0	0
TRINITY_DN10232_c0_g1	1230	1031	VPS28-2	ESCRT-I complex subunit VPS28	GO:0005768(endosome);GO:0015031(protein transport)	[U] Intracellular trafficking, secretion, and vesicular transport	K12184	ko04144(Endocytosis)	48.52	12.93	17.92	43.16	47.52	15.02	19.89	42.03	37.46	17.16	12.54	31.78	34.53	18.33	19.4	62.37
TRINITY_DN10233_c0_g1	896	697	-	-	-	-	-	-	1.39	2.31	1.07	0.67	0.86	2.13	1.53	3.04	1.43	1.1	0.84	2.22	0.4	1.85	0.85	0
TRINITY_DN10234_c0_g1	435	236	-	-	-	-	-	-	0	0.17	0.24	0	0	0	0.36	0	0	0	0.33	0	0	0.66	0.14	0
TRINITY_DN10234_c0_g2	633	434	-	-	-	-	-	-	0	0	35.59	0	0	0	0.05	0	0	0	5.38	0	0	0.16	0	0
TRINITY_DN10236_c0_g1	210	27.9	-	-	-	-	-	-	0	0	0	7.45	0	0	0	6.78	1.35	0	0	0	0	0	0	0
TRINITY_DN10237_c0_g1	269	71.55	-	-	-	-	-	-	0	0	0	0	0	0	0	0	0	0	0	9.41	0	0	0	0
TRINITY_DN10237_c0_g2	288	89.2	-	-	-	-	-	-	0	0	0	2.72	0	0	0	4.67	0	0	0	0	0	0	0	0
TRINITY_DN10237_c1_g1	1831	1632	-	-	-	-	-	-	16.95	7.51	5.01	0.25	20.4	8.23	4.74	0.09	22.71	11.54	2.51	0.08	26.15	7.44	4.38	0
TRINITY_DN10238_c0_g1	204	24.6	-	-	-	-	-	-	0	0	0	1.41	1.87	0	0	0	0	0	0	40.14	6	0	0	0
TRINITY_DN10238_c0_g2	265	68.02	-	-	-	-	-	-	0	0	0	0	0	0.27	0	3.34	0	0	0	0	0	0	0	0
TRINITY_DN10239_c0_g1	386	187	MT-CO1	cytochrome c oxidase subunit I	GO:0016021(integral to membrane);GO:0005743(mitochondrial inner membrane);GO:0070469(respiratory chain);GO:0004129(cytochrome-c oxidase activity);GO:0009055(electron carrier activity);GO:0020037(heme binding);GO:0005515(protein binding);GO:0009060(aerobic respiration);GO:0006123(mitochondrial electron transport, cytochrome c to oxygen)	[C] Energy production and conversion	K02256	ko00190(Oxidative phosphorylation);ko04260(Cardiac muscle contraction);ko05010(Alzheimer's disease);ko05012(Parkinson's disease);ko05016(Huntington's disease)	0	0.22	0.69	0	0.12	0	0	0	0	0.29	0.1	0	0.3	0.09	0	0
TRINITY_DN10239_c0_g2	426	227	MT-CO1	cytochrome c oxidase subunit I	GO:0016021(integral to membrane);GO:0005743(mitochondrial inner membrane);GO:0070469(respiratory chain);GO:0004129(cytochrome-c oxidase activity);GO:0009055(electron carrier activity);GO:0020037(heme binding);GO:0005515(protein binding);GO:0009060(aerobic respiration);GO:0006123(mitochondrial electron transport, cytochrome c to oxygen)	[C] Energy production and conversion	K02256	ko00190(Oxidative phosphorylation);ko04260(Cardiac muscle contraction);ko05010(Alzheimer's disease);ko05012(Parkinson's disease);ko05016(Huntington's disease)	3.43	0	0	0	0	0.41	0.47	0	0	0	0	0.2	0	0	0.45	3.52
TRINITY_DN10240_c0_g1	650	431.45	SAC2	-	-	[I] Lipid transport and metabolism	-	-	2.25	0.37	0	1.31	3.18	0.72	0.09	2.14	3.34	0.22	0.36	0	2.09	0.42	0.08	6.45
TRINITY_DN10241_c0_g1	429	230	-	-	-	-	-	-	0.27	0.45	0.16	1.66	0.3	0.16	0.55	3.13	0.25	0.62	0	0	0	0.08	0	0
TRINITY_DN10241_c1_g1	559	360	-	-	-	-	-	-	1.34	0	0.1	1.35	0	0	0.3	0	1.78	0.1	0	0	1.13	0	0.19	0
TRINITY_DN10242_c0_g1	332	133	-	-	-	-	-	-	0	0.16	0	0	1.04	0.28	0	1.71	0.99	0.27	0	0	1.8	0.26	0	0
TRINITY_DN10243_c0_g1	1065	866	-	-	-	-	-	-	0.9	0.11	0.34	1.15	0.75	0.21	0.17	0.29	0.51	0.17	0.27	0	1.49	0.31	0.73	0
TRINITY_DN10243_c0_g2	260	63.71	-	-	-	-	-	-	0.2	0	0	3.33	0	0.07	1.36	0	0	0	0	0	0	0.16	0	0
TRINITY_DN10244_c0_g1	370	171	-	-	-	-	-	-	0.74	1.93	0.22	1.42	0	1.2	1	0.89	1.21	2.4	1.07	0	0.43	1.73	1.19	0
TRINITY_DN10245_c0_g1	1137	938	-	-	-	-	-	-	0	0.54	0.22	0	0	0.58	0.65	1.24	0	0	0.4	3.29	0	0	0.96	8.93
TRINITY_DN10245_c0_g2	1140	941	-	-	-	-	-	-	6.51	4.44	5.84	12.39	5.89	2.32	3.73	7.35	9.62	3.82	3.05	6.52	7.17	2.84	2.52	0
TRINITY_DN10245_c0_g3	1142	943	-	-	-	-	-	-	6.91	0.97	0	1.08	4.82	1.4	2.54	2.03	5.41	0.65	0.26	6.84	7.14	1.86	4.79	0
TRINITY_DN10245_c0_g4	1139	940	-	-	-	-	-	-	0.89	0	0	0	0.75	0	0	1.23	0.46	0	0	0.16	0.68	0.12	0	0
TRINITY_DN10246_c0_g1	249	54.65	-	-	-	-	-	-	8.41	0.7	0	3.17	10.75	0	0	2.33	15.77	0.42	0	0	6.41	0	0	0
TRINITY_DN10246_c0_g2	304	105	-	-	-	-	-	-	2.95	1.48	0.98	0	4.81	3.6	1.6	0.97	2.79	1.66	0.7	0	4.88	0.84	2.32	0
TRINITY_DN10247_c0_g1	530	331	-	-	-	-	-	-	1.21	0	0.34	2.15	0.07	0	0.71	4.86	1.48	0	0	0	1.06	0.32	0.26	9.28
TRINITY_DN10248_c0_g1	263	66.28	-	-	-	-	-	-	0	0	0	15.94	3.81	0.28	3.51	25.93	0	0	0	0	4.1	0.79	1.54	0
TRINITY_DN10248_c0_g2	284	85.37	-	-	-	-	-	-	0	1.45	0	0	1.63	0	1.26	3.82	0.66	0	0	20.5	2.22	0	0	0
TRINITY_DN10249_c0_g1	259	62.86	CALS3	callose synthase	GO:0000148(1,3-beta-D-glucan synthase complex);GO:0016021(integral to membrane);GO:0003843(1,3-beta-D-glucan synthase activity);GO:0006075(1,3-beta-D-glucan biosynthetic process);GO:0007047(cellular cell wall organization);GO:0008360(regulation of cell shape)	[M] Cell wall/membrane/envelope biogenesis	K11000	-	2.35	0	0	0	0	1.18	0	0	0.72	0.57	0	0	0	0	0.95	0
TRINITY_DN10249_c0_g2	260	63.71	CALS3	callose synthase	GO:0000148(1,3-beta-D-glucan synthase complex);GO:0016021(integral to membrane);GO:0003843(1,3-beta-D-glucan synthase activity);GO:0006075(1,3-beta-D-glucan biosynthetic process);GO:0007047(cellular cell wall organization);GO:0008360(regulation of cell shape)	[M] Cell wall/membrane/envelope biogenesis	K11000	-	2.3	0	0.58	0	2.53	0.58	0	0	1.06	0.28	0.29	0	2.32	1.37	0.93	0
TRINITY_DN1024_c0_g1	300	101	-	-	-	-	-	-	9.57	4.7	6.8	14.06	5.47	12.15	7.58	35.61	10.08	5.64	9.42	18.44	40.89	3.62	0	0
TRINITY_DN10250_c0_g1	2361	2104.56	LSF1	5'-AMP-activated protein kinase, regulatory gamma subunit	-	[V] Defense mechanisms	K07200	ko04910(Insulin signaling pathway);ko04920(Adipocytokine signaling pathway);ko05410(Hypertrophic cardiomyopathy (HCM))	9.55	2.26	2.56	2.4	8.04	1.9	2.6	1.21	8.71	2.21	2.36	0.02	6.94	1.78	2.09	0.66
TRINITY_DN10251_c0_g1	1347	1148	-	-	-	-	-	-	3.86	0.13	0.1	0	0.9	0.1	0.07	0	6.01	0.16	0	0	0.56	0.14	0.03	0
TRINITY_DN10252_c0_g1	817	618	At2g27730	-	GO:0005747(mitochondrial respiratory chain complex I);GO:0005730(nucleolus);GO:0005773(vacuole);GO:0005507(copper ion binding);GO:0009853(photorespiration)	-	-	-	277.71	70.03	163.97	167.75	264.86	86.56	164.31	171.57	311.92	86.84	60.38	192.91	298.62	68.94	108.58	289.71
TRINITY_DN10253_c0_g1	1184	985	-	-	-	-	-	-	0.09	0.67	0	0	0.28	1.13	0	0.19	0	0.02	0	0	0	0.97	1.12	0
TRINITY_DN10253_c1_g1	213	29.64	-	-	-	-	-	-	0	2.78	0	0	0	1.88	0	0	0	0	0	0	0	0	1.72	0
TRINITY_DN10253_c2_g1	267	69.78	-	-	-	-	-	-	0	0.3	0.53	0	1.65	1.6	0	0	0	0	0	0	1.06	0.25	1.71	0
TRINITY_DN10254_c0_g1	1346	1147	-	-	-	-	-	-	0	0	0	0.45	0	0.25	0	0	0.33	0	0.32	0	0.13	0	0	0
TRINITY_DN10254_c0_g2	1411	1212	-	-	-	-	-	-	0.19	0.85	0.67	0	0.4	0.44	0.53	0	0	0.88	0.32	0	0	0.67	0.2	0
TRINITY_DN10254_c1_g1	302	103	At3g59150	-	GO:0005515(protein binding)	-	-	-	0.82	3.2	2.52	0	2.46	1.44	1.03	0	0.37	3.29	1.42	0	0	3.21	0	0
TRINITY_DN10255_c0_g1	360	161	-	-	-	-	-	-	0	0	0	0.47	0	0	0.26	5.71	0	0	0.14	7.39	0	0	0	0
TRINITY_DN10255_c0_g2	267	69.78	-	-	-	-	-	-	0	0	0	2.71	0	0	0	0	0	0	0	1.32	0	0	0	0
TRINITY_DN10256_c0_g1	1399	1200	ANN4	-	GO:0009506(plasmodesma);GO:0005509(calcium ion binding);GO:0005544(calcium-dependent phospholipid binding);GO:0009737(response to abscisic acid stimulus);GO:0009409(response to cold);GO:0009408(response to heat);GO:0009651(response to salt stress);GO:0009414(response to water deprivation)	[U] Intracellular trafficking, secretion, and vesicular transport	-	-	25.08	4.85	3.37	0.88	19.17	5.58	2.45	2.35	24.38	4.41	4.04	0	23.97	3.93	3.26	2.91
TRINITY_DN10257_c0_g1	214	30.23	-	-	-	-	-	-	2.78	0	0	0	1.52	0	0	0	7.48	0	0	0	0	0	0	0
TRINITY_DN10258_c0_g1	211	28.47	-	-	-	-	-	-	0	0	0	14.6	0	0	1.16	0	0	0	0	0	1.41	1.6	0	0
TRINITY_DN10258_c0_g2	451	252	-	-	-	-	-	-	0.08	0.08	0.29	0	0	0.3	0.54	0	0.67	0.14	0	0	1.01	0.86	0.34	0
TRINITY_DN10259_c0_g1	276	77.89	-	-	-	-	-	-	1.45	0	2	0	0	0	3.56	3.67	0	0	0	23.35	0	0	1.18	0
TRINITY_DN10259_c0_g2	248	53.86	-	-	-	-	-	-	11.88	0.38	0	1.61	0.85	0.69	0	10.13	0.7	0.56	0.34	0	8.19	0.6	5.5	0
TRINITY_DN10259_c0_g3	324	125	-	-	-	-	-	-	14.16	0.17	7.22	0	0	0	13.15	52.53	0	0.24	0	26.92	9.64	5.24	10.86	24.81
TRINITY_DN10259_c0_g4	320	121	-	-	-	-	-	-	0.53	0	0	0	0	0	0.29	3.32	0	0.24	0	0	0.72	0.22	0.21	25.51
TRINITY_DN1025_c0_g1	793	594	SMC2	-	GO:0000796(condensin complex);GO:0005737(cytoplasm);GO:0000228(nuclear chromosome);GO:0005524(ATP binding);GO:0046982(protein heterodimerization activity);GO:0051301(cell division);GO:0007076(mitotic chromosome condensation)	-	-	-	11.67	8.54	4.75	7.44	7.48	8.2	9.78	17.66	12.57	7.74	6.74	19.49	14.74	9.99	9.55	6.7
TRINITY_DN10260_c0_g1	331	132	PSBP	photosystem II oxygen-evolving complex 23kDa protein	GO:0009535(chloroplast thylakoid membrane);GO:0019898(extrinsic to membrane);GO:0009654(oxygen evolving complex);GO:0005509(calcium ion binding);GO:0015979(photosynthesis)	-	K02717	ko00195(Photosynthesis)	3.03	0.31	0	0	4.71	0.42	0.32	0	2	1.35	0.28	0	1.68	0.79	0.52	0
TRINITY_DN10261_c0_g1	222	35.18	-	-	-	-	-	-	0	0	0	7.39	0	0	0	0	1.61	0	0.52	0	0.52	0	0	0
TRINITY_DN10261_c0_g2	223	35.82	-	-	-	-	-	-	0	0	0	0	1.29	0	0	0	2.63	0	0	0	8.24	0	0	0
TRINITY_DN10262_c0_g1	539	340	-	-	-	-	-	-	2.23	1.7	1.04	5.04	0.14	0.4	2.13	3.45	0	0.26	0.05	2.44	0.48	0.42	1.35	0
TRINITY_DN10262_c0_g2	542	343	-	-	-	-	-	-	0	0	0	0	0	0.2	0	0	0.16	0.26	0	0	0.12	0.25	0	0
TRINITY_DN10263_c0_g1	2481	1794	Bp10	L-ascorbate oxidase	GO:0005576(extracellular region);GO:0005507(copper ion binding);GO:0016491(oxidoreductase activity)	[Q] Secondary metabolites biosynthesis, transport and catabolism	K00423	ko00053(Ascorbate and aldarate metabolism)	1.32	0.39	0.55	2.91	4.32	0.13	2.82	13.91	3.09	0.51	0.5	0.72	1.96	1.24	1.25	1.26
TRINITY_DN10264_c0_g1	793	594	-	-	-	-	-	-	0.42	0.35	0.53	0.61	0.08	0.22	0.5	0.45	1.24	0.12	0.12	0	0.56	0.5	0.66	0
TRINITY_DN10264_c1_g1	347	148	-	-	-	-	-	-	0.28	0.28	0	0	0.62	0	0.29	0	0.76	0	0	0	2.24	0.12	0.12	0
TRINITY_DN10265_c0_g1	216	31.43	-	-	-	-	-	-	0	0	0	0	0	0	0	0	0	0	0	0	0	0	0	29.47
TRINITY_DN10266_c0_g1	430	231	-	-	-	-	-	-	2.37	1.43	0.8	0	13.55	6.44	1.47	0.41	1.47	2.78	1.11	0	17.4	0.75	0.52	0
TRINITY_DN10267_c0_g1	221	34.54	-	-	-	-	-	-	0	0	1.08	0	0	0	0.62	69.07	0	0	0	14.94	0	1.01	1.48	0
TRINITY_DN10268_c0_g1	2159	1960	MLO6	mlo protein	GO:0016021(integral to membrane);GO:0005886(plasma membrane);GO:0005516(calmodulin binding);GO:0008219(cell death);GO:0009817(defense response to fungus, incompatible interaction)	-	K08472	-	4.17	1.65	0.44	0	3.75	1.33	1.23	0.19	6.47	0.96	0.64	0.86	4.4	1.08	0.35	0.01
TRINITY_DN10269_c0_g1	979	780	-	-	-	-	-	-	1.16	0.79	0.17	0.53	0.77	0.1	0.38	1.07	1.35	0.62	0.12	3.11	1.32	0.36	0.26	0
TRINITY_DN1026_c0_g1	1090	891	tlp	-	GO:0005576(extracellular region);GO:0050832(defense response to fungus);GO:0031640(killing of cells of other organism)	-	-	-	0.47	0.12	0.06	0.57	0.85	0.38	0.13	3.19	0.83	0.17	0.16	0	0.77	0.21	0.32	0
TRINITY_DN10270_c0_g1	216	31.43	-	-	-	-	-	-	1.34	2.63	0.59	11.02	4.4	0.59	0	5.42	4.8	0	0	0	12.32	0.55	0.54	0
TRINITY_DN10271_c0_g1	477	278	-	-	-	-	-	-	0.68	0.2	0.32	0	1.24	0.07	0	1.27	1.08	0	0.17	0	1.05	0.34	0	0
TRINITY_DN10271_c0_g2	266	68.9	-	-	-	-	-	-	0.29	0.39	0.86	0	0	1.05	0	0.1	0	0	0.1	0	0.6	0.9	0	0
TRINITY_DN10272_c0_g1	215	30.82	-	-	-	-	-	-	76.25	25.43	4.82	2.81	21.66	5.43	4.14	2.46	52.59	5.78	14.83	32.76	11.96	6.76	7.73	0.68
TRINITY_DN10273_c0_g1	429	230	-	-	-	-	-	-	0.27	0	0.32	0	0.35	0.24	0	0	0.8	0	0	0	0	0.08	0	0
TRINITY_DN10273_c0_g2	437	238	-	-	-	-	-	-	0	0	0	0.58	0.33	0.16	0	1.43	0.25	0	0	0	0.31	0	0.07	0
TRINITY_DN10274_c0_g1	222	35.18	-	-	-	-	-	-	2.39	0	0	0	7.85	0	0	3.77	0	0	0	0	0	0	0	0
TRINITY_DN10274_c0_g2	213	29.64	-	-	-	-	-	-	0	0.7	0	0	7.77	0	0	0	2.54	0.6	0	0	0.62	0	0	0
TRINITY_DN10275_c0_g1	1207	1008	-	20S proteasome subunit beta 5	GO:0005737(cytoplasm);GO:0005634(nucleus);GO:0005839(proteasome core complex);GO:0004298(threonine-type endopeptidase activity);GO:0051603(proteolysis involved in cellular protein catabolic process)	[O] Posttranslational modification, protein turnover, chaperones	K02737	ko03050(Proteasome)	194.2	37.82	44.74	63.12	154.53	45.55	58.69	50.59	212.33	48.93	33.17	58.57	167.02	40.61	44.98	58.93
TRINITY_DN10276_c0_g1	201	23.03	-	phenylalanyl-tRNA synthetase alpha chain	-	-	K01889	ko00970(Aminoacyl-tRNA biosynthesis)	0.91	0.9	0.81	10.53	0	0	0	13.97	4.91	1.55	1.59	0.97	0	0	0	0
TRINITY_DN10276_c0_g2	223	35.82	-	phenylalanyl-tRNA synthetase alpha chain	-	-	K01889	ko00970(Aminoacyl-tRNA biosynthesis)	0	0	0	0	0	0	0	0	0	0	0	3.13	0	0	0	0
TRINITY_DN10277_c0_g1	678	479	RPL37A	large subunit ribosomal protein L37Ae	GO:0005840(ribosome);GO:0046872(metal ion binding);GO:0003735(structural constituent of ribosome);GO:0006412(translation)	[J] Translation, ribosomal structure and biogenesis	K02921	ko03010(Ribosome)	555.5	86.17	244.34	207.13	404.25	80.13	178.63	190.77	511.23	110.48	117.91	214.88	373.3	108.53	73.15	400.27
TRINITY_DN10278_c0_g1	295	96.03	-	-	-	-	-	-	0	0.21	0	0	1.92	0.39	0.44	2.96	0.39	0.19	0	0	4.99	0	0.35	0
TRINITY_DN10278_c1_g1	369	170	-	-	-	-	-	-	0.74	0.12	0	0	0	0	0	1.56	1.55	0.21	0.43	0	0.87	0.51	0.1	0
TRINITY_DN10279_c0_g1	1689	1490	Lancl1	-	GO:0005737(cytoplasm);GO:0016020(membrane);GO:0005634(nucleus);GO:0003824(catalytic activity);GO:0043295(glutathione binding);GO:0008270(zinc ion binding)	[V] Defense mechanisms	-	-	6.73	22.73	69.3	69.23	5.93	37.71	35.42	87.05	6.57	35.78	23.72	95.81	3.94	42.93	3.46	231.08
TRINITY_DN1027_c0_g1	217	32.04	-	-	-	-	-	-	0	0	0	12.98	4.31	0	0	6.5	0	0	0	18.21	0	0	0.53	0
TRINITY_DN10280_c0_g1	505	306	-	-	-	[R] General function prediction only	-	-	1.01	0	0	0	0	0	0.17	0	1.31	0	0	2.2	0	0	0	4.26
TRINITY_DN10280_c0_g2	782	583	AtMg00810	-	GO:0005739(mitochondrion)	[R] General function prediction only	-	-	1.56	0.14	0	0.24	0	0	0.1	0.26	1.7	0	0	0	0	0	0.06	0
TRINITY_DN10280_c1_g1	243	49.97	AtMg00810	-	GO:0005739(mitochondrion)	[R] General function prediction only	-	-	5.47	0	0	2.77	0	0	0.43	0	1.89	0	0	0	0	0	0	0
TRINITY_DN10281_c0_g1	2185	1986	PCMP-H76	-	-	[R] General function prediction only	-	-	1.02	0.31	0.64	2.14	0.67	0.43	0.36	1.05	2	0.29	0.47	0.95	1.04	0.46	0.64	1.76
TRINITY_DN10282_c0_g1	220	33.9	-	-	-	-	-	-	0	0.61	0	6.64	0	0	0	3.35	0	0	0	6.62	0	0	0	0
TRINITY_DN10282_c0_g2	208	26.77	-	-	-	-	-	-	0	0	0	0	0	0	0	0.71	0	0	0	0	0	0	0	0
TRINITY_DN10282_c0_g3	266	68.9	-	-	-	-	-	-	0	0.3	0	0.5	0	0	0	9.89	0	0	0	14.33	0	0	0	0
TRINITY_DN10283_c0_g1	260	63.71	AtMg00810	-	GO:0005739(mitochondrion)	[R] General function prediction only	-	-	1.32	0	0	0	1.08	0.58	0	1.19	0.3	0.84	0	0	0.58	1.37	0.27	0
TRINITY_DN10284_c0_g1	460	261	-	-	-	-	-	-	1.85	0.4	0.57	0.66	0.18	0.78	0.33	0	1.37	0.41	0.07	2.49	0.35	0.53	0.13	0
TRINITY_DN10285_c0_g1	917	718	SQD1	UDP-sulfoquinovose synthase	GO:0009507(chloroplast);GO:0050662(coenzyme binding);GO:0008146(sulfotransferase activity);GO:0046507(UDPsulfoquinovose synthase activity);GO:0008270(zinc ion binding);GO:0016036(cellular response to phosphate starvation);GO:0009247(glycolipid biosynthetic process)	[M] Cell wall/membrane/envelope biogenesis	K06118	ko00520(Amino sugar and nucleotide sugar metabolism);ko00561(Glycerolipid metabolism)	0.11	0.32	0.3	0.05	0.41	0.51	0.92	0	0	0	0.44	0	1.48	1.72	1.35	0
TRINITY_DN10285_c0_g2	973	774	SQD1	UDP-sulfoquinovose synthase	GO:0009507(chloroplast);GO:0050662(coenzyme binding);GO:0008146(sulfotransferase activity);GO:0046507(UDPsulfoquinovose synthase activity);GO:0008270(zinc ion binding);GO:0016036(cellular response to phosphate starvation);GO:0009247(glycolipid biosynthetic process)	[M] Cell wall/membrane/envelope biogenesis	K06118	ko00520(Amino sugar and nucleotide sugar metabolism);ko00561(Glycerolipid metabolism)	2.18	1.01	0.68	0	0.99	0.44	0	0.59	2.26	0.62	0.75	0	0.51	0	0	0
TRINITY_DN10286_c0_g1	236	44.76	-	-	-	-	-	-	8.45	0	6.33	0.39	5.66	2.5	6.47	23.66	9.99	2.39	4.49	0	12.43	1.94	7.18	0
TRINITY_DN10286_c0_g2	235	44.04	-	-	-	-	-	-	4.3	0.47	0.31	0.79	0.52	1.68	2.61	2.61	2.26	0	0	0.51	3.28	1.19	3.14	0
TRINITY_DN10288_c0_g1	567	368	PSBT	-	GO:0009535(chloroplast thylakoid membrane);GO:0009523(photosystem II);GO:0015979(photosynthesis)	-	-	-	28.69	0.69	0	0	44.7	1.37	0	0	6.15	3.83	0	0	5.15	0.36	0	0
TRINITY_DN10289_c0_g1	314	115	-	-	-	-	-	-	0	0.18	0	0	0	0	0.37	2.63	0.33	0	0	0	0.32	0.15	0	0
TRINITY_DN10289_c0_g2	241	48.46	-	-	-	-	-	-	0.66	0	0	8.58	0	0.38	0	0	0.78	1.47	0	0	0	0.72	0	0
TRINITY_DN10289_c0_g3	314	115	-	-	-	-	-	-	0.82	0	0	0	0	0	0	0	0	0	0	0	0	0	0	0
TRINITY_DN1028_c0_g1	334	135	UBC35	ubiquitin-conjugating enzyme E2 N	GO:0031372(UBC13-MMS2 complex);GO:0005524(ATP binding);GO:0005515(protein binding);GO:0004842(ubiquitin-protein ligase activity);GO:0006301(postreplication repair);GO:0046686(response to cadmium ion);GO:0010039(response to iron ion);GO:0010053(root epidermal cell differentiation);GO:0006511(ubiquitin-dependent protein catabolic process)	[O] Posttranslational modification, protein turnover, chaperones	K10580	ko04120(Ubiquitin mediated proteolysis)	0	0	0.69	1.41	3.24	0	0.63	1.68	0	0.07	0.27	0	0.27	0	0.13	0
TRINITY_DN1028_c0_g2	334	135	UBC35	ubiquitin-conjugating enzyme E2 N	GO:0031372(UBC13-MMS2 complex);GO:0005524(ATP binding);GO:0005515(protein binding);GO:0004842(ubiquitin-protein ligase activity);GO:0006301(postreplication repair);GO:0046686(response to cadmium ion);GO:0010039(response to iron ion);GO:0010053(root epidermal cell differentiation);GO:0006511(ubiquitin-dependent protein catabolic process)	[O] Posttranslational modification, protein turnover, chaperones	K10580	ko04120(Ubiquitin mediated proteolysis)	2.34	0.46	0	0	0	1.65	0.95	0	1.82	0.07	0	0	0.27	1.42	0.13	0
TRINITY_DN10290_c0_g1	1469	1270	-	-	-	-	-	-	2.18	0.18	0.03	0	2.99	0.07	0	0	3.52	0.08	0.03	0	1.22	0.18	0.03	0
TRINITY_DN10290_c1_g1	942	743	-	-	-	-	-	-	1.27	0.08	0	0	1.8	0.18	0	0	1.78	0.05	0	0	1.32	0.05	0.27	0
TRINITY_DN10291_c0_g1	688	489	-	-	-	-	-	-	0.14	0.72	0.49	0	0.28	0.53	0.26	1.59	0	0.22	0	0	0.9	0.46	0.07	0
TRINITY_DN10291_c0_g2	689	490	-	-	-	-	-	-	0.42	0	0	0	0	0	0	0	0.85	0.22	0.26	0	0	0	0.14	0
TRINITY_DN10291_c1_g1	360	161	-	-	-	-	-	-	0	0.9	0.69	1.08	0	0.23	0.26	0.94	0.7	0.77	0	0	0.92	0.11	0.32	0
TRINITY_DN10292_c0_g1	486	287	-	-	-	[R] General function prediction only	-	-	0.31	0.03	0	0	0	0	0.07	0.59	0.95	0	0	2.42	1.35	0	0.13	0
TRINITY_DN10292_c0_g2	870	671	-	-	GO:0004190(aspartic-type endopeptidase activity);GO:0003677(DNA binding);GO:0004519(endonuclease activity);GO:0003964(RNA-directed DNA polymerase activity);GO:0008270(zinc ion binding);GO:0015074(DNA integration)	[R] General function prediction only	-	-	0.59	0.17	0	2.4	0	0.28	0	0	0.52	0.16	0.21	0	0	0.19	0.04	0
TRINITY_DN10292_c0_g3	510	311	-	-	GO:0004190(aspartic-type endopeptidase activity);GO:0003677(DNA binding);GO:0004519(endonuclease activity);GO:0003964(RNA-directed DNA polymerase activity);GO:0008270(zinc ion binding);GO:0015074(DNA integration)	[R] General function prediction only	-	-	0	0	0	0	0	0.11	0	1.34	0	0	0.02	0	0.36	0.15	0	0
TRINITY_DN10293_c0_g1	1815	1616	-	-	-	-	-	-	0.03	1.67	1.21	5.11	21.81	2.45	3.95	3.7	5.35	0	0.26	0	12.2	9.69	0.96	0
TRINITY_DN10293_c0_g2	1815	1616	-	-	-	-	-	-	17.24	3.13	1.79	0	16.94	0	0	4.37	11.27	5.81	1.85	36.31	0	7.82	2.33	13.66
TRINITY_DN10295_c0_g1	1113	914	PDX2	glutamine amidotransferase	GO:0005829(cytosol);GO:0004359(glutaminase activity);GO:0046982(protein heterodimerization activity);GO:0016740(transferase activity);GO:0006541(glutamine metabolic process);GO:0008615(pyridoxine biosynthetic process)	[H] Coenzyme transport and metabolism	K08681	ko00750(Vitamin B6 metabolism)	4.64	1.45	2.42	1.73	3.48	2.08	1.69	3.91	4.48	2.79	0.7	3.32	4.35	1.84	1.05	0
TRINITY_DN10295_c0_g2	1149	950	PDX2	glutamine amidotransferase	GO:0005829(cytosol);GO:0004359(glutaminase activity);GO:0046982(protein heterodimerization activity);GO:0016740(transferase activity);GO:0006541(glutamine metabolic process);GO:0008615(pyridoxine biosynthetic process)	[H] Coenzyme transport and metabolism	K08681	ko00750(Vitamin B6 metabolism)	29.81	7.62	16.49	20.36	17.84	12.45	14.36	12.86	37.78	8.77	7.97	7.32	15.79	9.42	10.03	32.64
TRINITY_DN10296_c0_g1	285	86.32	VAL2	-	GO:0005634(nucleus);GO:0003677(DNA binding);GO:0008270(zinc ion binding);GO:0010030(positive regulation of seed germination);GO:2000034(regulation of seed maturation);GO:0006355(regulation of transcription, DNA-dependent);GO:0006351(transcription, DNA-dependent)	-	-	-	2.68	0	4.09	4.82	0	0.22	0.74	3.51	5.4	0	0.85	13.27	0	0	1.18	0
TRINITY_DN10296_c0_g2	250	55.45	-	-	-	-	-	-	0	0.37	0	0	0	0	0	0	0.78	0	0	8.88	0.67	0	0	0
TRINITY_DN10297_c0_g1	1090	891	At1g67820	protein phosphatase	GO:0008287(protein serine/threonine phosphatase complex);GO:0046872(metal ion binding);GO:0004722(protein serine/threonine phosphatase activity);GO:0006470(protein dephosphorylation)	[T] Signal transduction mechanisms	K01090	-	2.7	0	0	0	2.14	0	0	0	5.48	0	0	0	0.05	0	0.11	0
TRINITY_DN10297_c0_g2	736	537	At1g67820	protein phosphatase	GO:0008287(protein serine/threonine phosphatase complex);GO:0046872(metal ion binding);GO:0004722(protein serine/threonine phosphatase activity);GO:0006470(protein dephosphorylation)	[T] Signal transduction mechanisms	K01090	-	0.45	0.12	0	0	2.54	0.14	0	0	1.89	0.07	0	0	1.53	0.19	0	0
TRINITY_DN10299_c0_g1	252	57.06	-	-	-	-	-	-	0.37	2.53	0.33	2.73	0	0.65	0	6.63	0.66	0	0	0	0	1.52	0	0
TRINITY_DN1029_c0_g1	269	71.55	-	-	-	-	-	-	0.59	0	0	2.42	3.22	0.26	0	0	2.37	2.49	1.28	0	0	0.73	0.24	0
TRINITY_DN102_c0_g1	612	413	-	-	-	-	-	-	0.71	0	0	0	1	0	0	0	0	0	0	0	0	0	0.99	4.33
TRINITY_DN102_c0_g2	611	412	-	-	-	-	-	-	0	0.2	0.18	2.27	0	0.99	0.05	2.71	1.42	0.17	0	2.61	1.03	0.3	0	0
TRINITY_DN10301_c0_g1	1449	1250	At2g40430	-	-	[R] General function prediction only	-	-	34	12.29	16.23	44.26	42.05	10.51	17.43	67.97	68.94	10.84	11.06	52.49	38.41	11.03	13.89	42.25
TRINITY_DN10302_c0_g1	319	120	-	-	-	-	-	-	0	0	0.08	0	3.28	0.08	0	0	0.16	0	0	0	0	0.07	0	0
TRINITY_DN10302_c0_g2	319	120	-	-	-	-	-	-	1.93	0	0.08	0	0.36	0.08	0	0	0.16	0.3	0	0	1.23	0.07	0	0
TRINITY_DN10303_c0_g1	284	85.37	-	-	-	-	-	-	1.97	0	0	0	1.35	0.44	0.5	1.77	0.44	0	0	0	0	0	0	0
TRINITY_DN10303_c0_g2	235	44.04	-	-	-	-	-	-	0	0	0	5.11	0	0	0.97	0	0	0.4	0	0	3.35	0	0	0
TRINITY_DN10304_c0_g1	248	53.86	-	-	-	-	-	-	2.73	0	0	0	0	0	0	0	0.35	1.98	0	0	3.77	0	0	0
TRINITY_DN10306_c0_g1	253	57.88	-	-	-	-	-	-	0	0	0.96	0	0	0.99	0.37	0	0	0.62	0	0	0	0.3	0	0
TRINITY_DN10306_c0_g2	267	69.78	-	-	-	-	-	-	0	2.37	0	0	0	0	0	8.41	0.81	0	0	0	0	0	0	0
TRINITY_DN10306_c0_g3	267	69.78	-	-	-	-	-	-	0	0	0	0	0	0.51	0	0	0	0	0	0	0	0	0	0
TRINITY_DN10307_c0_g1	1455	1256	Srrm1	-	GO:0016363(nuclear matrix);GO:0016607(nuclear speck);GO:0005681(spliceosomal complex);GO:0003677(DNA binding);GO:0003723(RNA binding);GO:0006397(mRNA processing);GO:0008380(RNA splicing)	-	-	-	0	0	0	0	0	0	0	0.8	0	0	0	0	0	0	0	0
TRINITY_DN10307_c0_g2	2372	2173	-	-	-	-	-	-	8.75	1.94	1.5	3.34	13.2	1.98	2.77	5.98	9.03	1.83	1.8	4.66	5.7	3.81	3.17	4.48
TRINITY_DN10308_c0_g1	1862	1663	aroB	3-dehydroquinate synthase	GO:0005737(cytoplasm);GO:0003856(3-dehydroquinate synthase activity);GO:0009073(aromatic amino acid family biosynthetic process)	[E] Amino acid transport and metabolism	K01735	ko00400(Phenylalanine, tyrosine and tryptophan biosynthesis)	64.33	33.23	33.37	50.73	57.55	35.4	42.23	66.9	59.28	39.8	31.26	71.56	61.54	39.26	48.3	70.12
TRINITY_DN10309_c0_g1	552	353	-	-	-	-	-	-	2.14	0.58	0	0	5.15	0.05	1.15	1.5	1.6	0.5	0.21	0	0	10.4	0.58	0
TRINITY_DN1030_c0_g1	224	36.47	-	-	-	-	-	-	2.31	0.57	0	0	15.15	0.51	1.75	5.19	5.17	1.47	1	0	5.56	2.86	2.8	0
TRINITY_DN10310_c0_g1	721	522	-	-	-	-	-	-	0.77	0.63	0.53	3.38	0.04	0.18	0.65	4.86	0.76	0	0.77	6.45	0.21	0.67	0.88	0
TRINITY_DN10311_c0_g1	782	583	POL	-	GO:0004190(aspartic-type endopeptidase activity);GO:0003677(DNA binding);GO:0004519(endonuclease activity);GO:0003723(RNA binding);GO:0003964(RNA-directed DNA polymerase activity);GO:0015074(DNA integration);GO:0006508(proteolysis);GO:0006278(RNA-dependent DNA replication)	[R] General function prediction only	-	-	0.8	0.18	0.35	3.62	0	0.38	0.07	0.75	0	0.12	0.56	6.08	0.22	0.15	0.47	0
TRINITY_DN10312_c0_g1	337	138	-	-	-	-	-	-	0.5	2.84	0	0	0	0.17	0	0	0.82	0	0.27	0	0	1.88	0	0
TRINITY_DN10312_c0_g2	239	46.96	-	-	-	-	-	-	0	0	0	0	0	1.08	0	0	0	0	0.78	0	0	1.53	0	0
TRINITY_DN10312_c0_g3	212	29.05	-	-	-	-	-	-	1.22	0.71	0.64	0	0	1.28	0	0	0	3.07	0	0	3.81	2.4	0	0
TRINITY_DN10313_c0_g1	735	536	-	E3 ubiquitin-protein ligase RNF14	-	[O] Posttranslational modification, protein turnover, chaperones	K11971	-	0.35	0.23	0	0	1.37	0.07	0.08	0	1.27	0.13	0.31	1.17	0.41	0.36	0.06	0.63
TRINITY_DN10314_c0_g1	248	53.86	-	-	-	-	-	-	1.17	1.53	10.68	62.71	5.13	0	8.69	23.89	0	2.65	2.72	9.99	3.77	0.97	2.53	12.51
TRINITY_DN10314_c0_g2	248	53.86	-	-	-	-	-	-	0	1.91	2.07	0	0	2.07	0	0	0	0	1.02	26.67	0	1.94	0	0
TRINITY_DN10314_c0_g3	249	54.65	-	-	-	-	-	-	0	0	0	0	0	0.34	0	25.64	0	0	0	0	0	0	9.66	0
TRINITY_DN10315_c0_g1	278	79.74	-	-	-	-	-	-	0	0	0	4.34	0	0.75	0	2.85	0.47	0	0	0	0	0	0	0
TRINITY_DN10315_c0_g2	225	37.13	-	-	-	-	-	-	0	0	0	2.8	2.48	0.89	0	0	0	0	0	0	0	0	0	0
TRINITY_DN10316_c0_g1	944	745	-	-	-	-	-	-	0	0.58	0.75	0	0.43	0	0.24	0	0.48	0	0.44	0	0.59	0	0	0
TRINITY_DN10316_c0_g2	952	753	-	-	-	-	-	-	0.78	0	0	0	0	0.72	0.22	0.63	0.3	0.14	0	0	0	0.67	0.41	0
TRINITY_DN10317_c0_g1	230	40.51	-	-	-	-	-	-	1.31	0	0	0	0	0	0	4.36	2.73	0	0.45	0	0	0	0.25	0
TRINITY_DN10317_c0_g2	531	332	-	-	-	-	-	-	1.04	0.25	0.34	0	1.66	0.62	0	0.61	1.43	0.43	0	0	1.94	0.79	0.17	0
TRINITY_DN10318_c0_g1	294	95.04	-	-	-	-	-	-	0.22	0	0	0.55	0	0	0.45	3.59	0.59	0.19	0.38	0	0.58	0.37	0.36	0
TRINITY_DN10319_c0_g1	224	36.47	-	-	-	-	-	-	1.73	1.13	0	5.22	10.73	0	0	0	6.2	0	0	0	0	0	0	0
TRINITY_DN1031_c0_g1	354	155	-	oligopeptidase A	-	[O] Posttranslational modification, protein turnover, chaperones	K01414	-	0	0	0	0	0.15	0	0	0	1.22	0	0	0	0	0	0	0
TRINITY_DN1031_c0_g2	352	153	-	oligopeptidase A	-	[O] Posttranslational modification, protein turnover, chaperones	K01414	-	0.41	0	0.12	0	0	0.36	0.56	0	0	0	0.72	0	0	0.46	0.45	0
TRINITY_DN10320_c0_g1	232	41.9	-	-	-	-	-	-	1	0	0	0	0	0.44	0	9.94	0.9	0	0	0	0	0	0	0
TRINITY_DN10320_c0_g2	386	187	-	-	-	-	-	-	3.15	0	0.1	0.56	2.46	0	0.57	0.81	0.91	0	0.49	0	1.28	0	0.09	0
TRINITY_DN10321_c0_g1	337	138	-	-	-	-	-	-	1.52	0.3	0.27	0	4.84	0.67	0.62	0.55	2.05	0.26	0.27	0	0.8	0	0	0
TRINITY_DN10322_c0_g1	715	516	-	vesicle transport through interaction with t-SNAREs 1	-	-	K08493	ko04130(SNARE interactions in vesicular transport)	0.73	1	0.29	1.21	0.94	0.29	0.41	0.48	1.97	0.83	0.14	0.52	1.64	0.3	0.26	0
TRINITY_DN10323_c0_g1	313	114	-	-	-	-	-	-	0.92	0	0	0	0.2	0	0	2.99	0	0.31	0	0	0	0.31	0	0
TRINITY_DN10323_c0_g2	319	120	-	-	-	-	-	-	0	0	0.15	4.04	0	0	0	0	0	0	0	0	0	0	0	0
TRINITY_DN10324_c0_g1	584	385	-	-	-	-	-	-	0.38	0.21	0.29	0.9	0.24	0.19	0	0	0	0.09	0	0	0.57	0.18	0.09	0
TRINITY_DN10324_c0_g2	585	386	-	-	-	-	-	-	0	0	0	0	0	0	0.28	0	2.39	0	0.28	0	0	0	0	0
TRINITY_DN10324_c1_g1	813	614	-	-	-	-	-	-	0.45	0.27	0.3	0	0.52	0.36	0.28	0.18	0.64	0.17	0.12	0.44	0.66	0.2	0	0
TRINITY_DN10325_c0_g1	410	211	-	-	-	-	-	-	0.2	0.25	0	0	2.17	0.06	0.26	2.15	1.43	0.08	0	0	2.45	0.66	0.69	0
TRINITY_DN10325_c0_g2	592	393	-	-	-	-	-	-	0.05	0.03	0	1.06	1.54	0	0.47	0	0	0.32	0.28	0	0	0.18	0	0
TRINITY_DN10325_c0_g3	973	774	-	-	-	-	-	-	0	0.08	0	0	0.44	0.03	0.57	0	0	0	0	0	0.26	0	0.6	0
TRINITY_DN10326_c0_g1	317	118	-	-	-	-	-	-	0	0	0	0.2	0	0	0	2.21	0	0	0	1.56	0	0.29	0.14	0
TRINITY_DN10326_c0_g2	315	116	-	-	-	-	-	-	0	0.18	0	0	0	0	0	12.3	0	0	0	0	0	0	0	0.36
TRINITY_DN10326_c0_g3	316	117	-	-	-	-	-	-	0	0	0	0.99	1.38	0.16	1.45	7.91	0.81	0	0.31	13.96	0.95	0.3	0.29	0
TRINITY_DN10327_c0_g1	605	406	-	-	-	-	-	-	0.64	0	0	0	0.56	0	0	0	0	0	0	0	2.08	0	0	0
TRINITY_DN10327_c0_g2	577	378	-	-	-	-	-	-	2.65	0	0.79	0	3.85	0.1	0.51	1	2.54	0.09	0.05	0	1.82	0.14	0.27	4.68
TRINITY_DN10328_c0_g1	1273	1074	EPHX2	-	GO:0005829(cytosol);GO:0005925(focal adhesion);GO:0005794(Golgi apparatus);GO:0005730(nucleolus);GO:0005777(peroxisome);GO:0005625(soluble fraction);GO:0004301(epoxide hydrolase activity);GO:0046872(metal ion binding);GO:0042803(protein homodimerization activity);GO:0019439(aromatic compound catabolic process);GO:0006874(cellular calcium ion homeostasis);GO:0017144(drug metabolic process);GO:0006…	[I] Lipid transport and metabolism	-	-	7.67	21.55	41.19	31.79	39.87	28.57	30.07	24.13	7.72	30.27	31.49	5.45	39.69	34.79	27.77	26.26
TRINITY_DN10329_c0_g1	879	680	-	-	-	[S] Function unknown	-	-	25.04	7.43	10.4	33.52	27.05	5.88	12.51	34.69	36.03	7.02	4.98	21.85	24.54	6.55	10.69	22.81
TRINITY_DN1032_c0_g1	284	85.37	-	-	-	-	-	-	0	0.48	0	0	1.62	0	0	8.65	0	0	0	0	0	0.41	0.4	0
TRINITY_DN10330_c0_g1	206	25.67	-	-	-	-	-	-	4.09	4.02	0	0	0	0	0	0	2.94	0.69	2.85	0	0	0.68	0	0
TRINITY_DN10331_c0_g1	247	53.07	-	-	-	-	-	-	0	0.78	0	0	0	0	0	0	4.26	0	0	0	3.47	0.33	0	0
TRINITY_DN10331_c1_g1	499	300	-	-	-	-	-	-	0.21	0.28	0	0	0.77	0.37	0	0	1.01	0	0.06	2.24	2.09	0.17	0.11	0
TRINITY_DN10332_c0_g1	600	401	-	-	-	-	-	-	0.16	0.3	0	0	0	0	0	0	0.85	0	0	0	0	0	0.3	0
TRINITY_DN10332_c0_g2	474	275	-	-	-	-	-	-	0	0.01	0	0	0	0	0.15	1.93	0	0	0	0	0	0	0	0
TRINITY_DN10332_c0_g3	507	308	-	-	-	-	-	-	0	0	0.06	0	0	0.36	0	0	0	0.29	0.24	0	1.08	0	0	0
TRINITY_DN10333_c0_g1	597	398	-	-	-	-	-	-	1.21	0.83	0.09	1.26	0.06	0.79	0.11	0.1	0.38	0.4	0.28	0	0.19	0.61	0.6	0
TRINITY_DN10333_c1_g1	304	105	-	-	-	-	-	-	1.6	1.38	0	0	0	0	0	0	2.33	1.36	0	0	0	0.17	0.16	0
TRINITY_DN10334_c0_g1	914	715	RPL7A	large subunit ribosomal protein L7Ae	GO:0042254(ribosome biogenesis)	[J] Translation, ribosomal structure and biogenesis	K02936	ko03010(Ribosome)	22.56	8.28	16.23	15.98	31.39	9.39	11.45	19.46	69.28	8.93	7.7	20.18	39.95	8.76	7.31	21.93
TRINITY_DN10335_c0_g1	298	99	-	-	-	-	-	-	1.27	0	0	0	0.93	1.5	0.43	1.15	0.19	0.9	0	0	1.86	0.7	0.17	0
TRINITY_DN10336_c0_g1	345	146	-	-	-	-	-	-	0	0	0	0	0.63	0.51	0.15	0	1.55	0.24	0	0	0.38	0	0.23	0
TRINITY_DN10336_c0_g2	345	146	-	-	-	-	-	-	1.44	0.57	0.51	0	0.63	0	0.15	0	0	0	1.25	0	0.38	0.6	0.23	0
TRINITY_DN10337_c0_g1	300	101	-	-	-	-	-	-	1.25	0.2	0	0	2.51	0.74	1.69	0.75	4.29	0.88	0	0	5.29	0	0	0
TRINITY_DN10338_c0_g1	227	38.47	RPS7C	small subunit ribosomal protein S7e	GO:0022627(cytosolic small ribosomal subunit);GO:0005730(nucleolus);GO:0005886(plasma membrane);GO:0009506(plasmodesma);GO:0003735(structural constituent of ribosome);GO:0006412(translation)	[J] Translation, ribosomal structure and biogenesis	K02993	ko03010(Ribosome)	7.65	0	1.93	5.4	5.98	0	0	3.94	8.33	0	0	0	9.59	0.9	0.44	0
TRINITY_DN10339_c0_g1	1058	859	-	-	-	-	-	-	5.91	0	0.62	3.11	8.15	0	0	0.79	3.74	0.16	0	0	0.18	0	1.48	0
TRINITY_DN10339_c0_g2	724	525	-	-	-	-	-	-	0.04	0	0.16	0	0	0	1.05	0	2.83	0.3	0	4.85	2.91	0	0	23.73
TRINITY_DN1033_c0_g1	326	127	-	-	-	-	-	-	0.83	0	0	4.5	0	0	0	0.3	1.78	0	0.72	6.01	0	0.27	0.54	0
TRINITY_DN10340_c0_g1	1054	855	At4g12060	-	GO:0009941(chloroplast envelope);GO:0009570(chloroplast stroma);GO:0043424(protein histidine kinase binding);GO:0019538(protein metabolic process)	-	-	-	58.51	8.83	13.03	17.79	47.82	10.96	10.35	19.53	57.38	12.48	7.32	3.23	58.94	7.53	8.82	13.17
TRINITY_DN10342_c0_g1	426	227	-	-	-	-	-	-	2.5	0.45	0	0.46	0.81	0.41	0	0	0.66	0.39	0	0	0.41	0	0.15	0
TRINITY_DN10343_c0_g1	236	44.76	-	-	-	-	-	-	0	0	0	0	0	0	0	0	0	0	0	0	11.09	0	0.33	0
TRINITY_DN10343_c0_g2	238	46.22	-	-	-	-	-	-	3.36	0	0	0	0	0	0	0	0	0	0	0	0	0.75	0	0
TRINITY_DN10344_c0_g1	482	283	CYP82C4	-	GO:0016021(integral to membrane);GO:0009055(electron carrier activity);GO:0020037(heme binding);GO:0004497(monooxygenase activity);GO:0016705(oxidoreductase activity, acting on paired donors, with incorporation or reduction of molecular oxygen);GO:0071281(cellular response to iron ion)	[Q] Secondary metabolites biosynthesis, transport and catabolism	K00517	ko00361(gamma-Hexachlorocyclohexane degradation);ko00626(Naphthalene and anthracene degradation);ko00903(Limonene and pinene degradation);ko00945(Stilbenoid, diarylheptanoid and gingerol biosynthesis)	1.11	0.29	0.52	0.86	0.33	0.33	2.1	4.48	2.13	0	1.36	4.68	0.98	0.68	1.5	7.44
TRINITY_DN10345_c0_g1	353	154	-	-	-	-	-	-	0	0	0	2.14	0	0	0	0.74	0	0	0	9.62	0	0.23	0.66	0
TRINITY_DN10346_c0_g1	251	56.26	-	-	GO:0004190(aspartic-type endopeptidase activity);GO:0003677(DNA binding);GO:0004519(endonuclease activity);GO:0003964(RNA-directed DNA polymerase activity);GO:0008270(zinc ion binding);GO:0015074(DNA integration)	[R] General function prediction only	-	-	0	0	0	5.24	2.86	0	0	1.35	0	0	0	0	0	0	0	0
TRINITY_DN10347_c0_g1	624	425	-	-	-	-	-	-	0.99	1.21	0.36	1.71	0	0.37	0	0	1.33	0.8	0	0	0	0.49	0	0
TRINITY_DN10347_c0_g2	623	424	-	-	-	-	-	-	0	0	1.44	0	0	1.12	0.4	0	0	0	0.35	0	0.17	0	0.44	0
TRINITY_DN10348_c0_g1	224	36.47	NAC090	-	GO:0005634(nucleus);GO:0003677(DNA binding);GO:0006355(regulation of transcription, DNA-dependent);GO:0006351(transcription, DNA-dependent)	-	-	-	0	0	0	0	0	0.51	0	7.79	0	0	0.5	0	0	1.43	0	0
TRINITY_DN1034_c0_g1	1340	1141	SLC38A6	-	GO:0016021(integral to membrane);GO:0006865(amino acid transport);GO:0006814(sodium ion transport)	[E] Amino acid transport and metabolism	-	-	0.74	0.11	1.17	0	0.26	0.26	0.22	0.37	5.09	0.09	0.26	4.68	0.81	0.32	0	0
TRINITY_DN10350_c0_g1	735	536	-	-	-	[R] General function prediction only	-	-	0.94	0.15	0	0.52	0	0.39	0	0.44	0.77	0.11	0.07	0	0.21	0.46	0.05	0
TRINITY_DN10350_c0_g2	459	260	-	-	-	[R] General function prediction only	-	-	0	0	0	0	0	0	0.49	0.99	0	0	0	0	0	0	0	0
TRINITY_DN10350_c0_g3	416	217	-	-	-	[R] General function prediction only	-	-	0.79	0	0.17	0	0.32	0.06	0	0	0	0.31	0	0	0	0.06	0.1	0
TRINITY_DN10351_c0_g1	1606	1407	WAT1	-	-	-	-	-	2.08	0	0	0	1.12	0	0	0	0	1.37	0	0	0	0	0	0
TRINITY_DN10351_c0_g2	1601	1402	WAT1	-	-	-	-	-	1.71	0.62	0.08	0	6.66	0.81	0.46	0	4.01	0	0.13	0	1.72	0.57	0.02	0
TRINITY_DN10352_c0_g1	503	304	-	-	-	-	-	-	1.11	0.14	0.12	0	1.36	0.37	0.14	0	2.05	0.29	0	0	1.21	0.06	0.11	0
TRINITY_DN10352_c1_g1	680	481	-	-	-	-	-	-	1.22	0.09	0.39	0	0.29	0	0	0	0.74	0.22	0	0	0.54	0.07	0	0
TRINITY_DN10353_c0_g1	391	192	-	-	-	-	-	-	0.13	0.43	1.39	0	0	0	0	0	0	0	0.1	0	0	0.11	0.1	0
TRINITY_DN10353_c0_g2	390	191	-	-	-	-	-	-	1.96	0	3.56	6.35	1.21	0.88	0.78	0	0	0	0.48	5.17	1.35	1.44	2.13	0
TRINITY_DN10355_c0_g1	704	505	-	-	-	-	-	-	0.62	0.04	0.11	0	0	0.4	0	1.2	0.67	0.11	0.07	0	0.69	0.28	0.03	0
TRINITY_DN10356_c0_g1	554	355	-	-	-	-	-	-	1.12	0	0.42	0	0.13	0.31	0.12	1.92	1.7	0.25	0.21	0	0.47	0.2	0.1	0
TRINITY_DN10357_c0_g1	449	250	-	-	-	-	-	-	3.95	0.5	0.82	0	2.67	0.45	1.28	0.76	6.11	0.21	0.07	0	2.07	0.91	0.48	0
TRINITY_DN10358_c0_g1	1617	1418	MAP2B	methionyl aminopeptidase	GO:0005737(cytoplasm);GO:0004177(aminopeptidase activity);GO:0046872(metal ion binding);GO:0008235(metalloexopeptidase activity);GO:0009987(cellular process);GO:0016485(protein processing);GO:0006508(proteolysis)	[R] General function prediction only	K01265	-	2.8	1.59	1.31	0.6	2.84	1.3	1.67	2.34	3.16	1.73	1.06	1.95	4.32	0.98	0.94	0
TRINITY_DN10359_c0_g1	592	393	-	-	-	-	-	-	1.44	0.42	0.33	0	2.05	0.24	0.32	0	1.87	0.18	0.42	0	0.84	0.22	0.48	0
TRINITY_DN1035_c0_g1	270	72.44	-	-	-	-	-	-	0.58	0	0	5.26	0.64	0	1.76	1.57	1.04	0	0	0	0	1.2	0.24	0
TRINITY_DN10360_c0_g1	844	645	-	-	-	-	-	-	0.72	0.58	0.12	1.13	0.43	0.29	0.4	0.7	1.08	0.58	0.23	0.63	0.51	0.46	0.24	0
TRINITY_DN10361_c0_g1	1729	1530	At2g43200	-	GO:0005789(endoplasmic reticulum membrane);GO:0016021(integral to membrane);GO:0008168(methyltransferase activity)	-	-	-	0.2	0	0.3	0	0	0.75	0	0	1.59	0.22	0.06	0	1.92	0.17	0	0
TRINITY_DN10361_c0_g2	2064	1865	At2g43200	-	GO:0005789(endoplasmic reticulum membrane);GO:0016021(integral to membrane);GO:0008168(methyltransferase activity)	-	-	-	3.24	0.96	0.11	0.2	4.85	0.11	0.23	0.14	2.46	0.84	0.33	0	2.22	0.67	0.23	0
TRINITY_DN10362_c0_g1	1412	1213	-	-	-	[L] Replication, recombination and repair	-	-	19.48	4.23	4.71	2.58	24.88	5.49	7.47	3.71	30.1	5.05	3.51	5.94	21.54	5.62	5.68	2.29
TRINITY_DN10363_c0_g1	773	574	-	-	-	-	-	-	1.76	0.58	0.58	0.72	0.64	0.62	0.48	1.35	2.27	0.53	0.06	0	1.28	0.82	0.12	0
TRINITY_DN10364_c0_g1	410	211	-	-	-	-	-	-	0	0	0.22	0.82	0	0.35	0.1	0	0	0.51	0	0	0.26	0	0	0
TRINITY_DN10364_c0_g2	382	183	-	-	-	-	-	-	0.46	0.11	0.76	0	0	0	0	0	0	0	0.1	0	0	1.24	0	0
TRINITY_DN10365_c0_g1	246	52.29	-	-	-	-	-	-	0.8	0	0.71	0	0	0	0	6.52	0.72	0	0	0	0	0	0.98	0
TRINITY_DN10366_c0_g1	425	226	CBSDUFCH1	-	GO:0031969(chloroplast membrane);GO:0016021(integral to membrane);GO:0050660(flavin adenine dinucleotide binding);GO:0006810(transport)	[S] Function unknown	-	-	0.56	0.09	0.41	1.53	0	0.33	0.94	1.59	0.75	0.24	0.08	0	0.08	0.31	0.15	0
TRINITY_DN10367_c0_g1	659	460	-	-	-	-	-	-	2.24	0.81	0.2	0	1.85	0.57	0.42	0.99	2.62	1.2	0.4	0.59	1.04	1.1	0.52	0
TRINITY_DN10368_c0_g1	371	172	-	-	-	-	-	-	0.98	0.12	0	1.01	0.54	0	0.62	0	3.4	0	0.21	0	0.21	0	0.2	0
TRINITY_DN10369_c0_g1	979	780	LRX3	-	GO:0005576(extracellular region);GO:0009505(plant-type cell wall);GO:0009506(plasmodesma);GO:0005515(protein binding);GO:0007047(cellular cell wall organization)	-	-	-	12.93	1.06	3.59	54.54	9.4	0.85	4.85	57.12	12.01	2.17	0.89	333.94	2.39	0.56	4.98	90.24
TRINITY_DN10369_c0_g2	967	768	Hrb87F	-	GO:0000785(chromatin);GO:0005737(cytoplasm);GO:0035062(omega speckle);GO:0005703(polytene chromosome puff);GO:0030529(ribonucleoprotein complex);GO:0000166(nucleotide binding);GO:0003723(RNA binding);GO:0043565(sequence-specific DNA binding);GO:0007067(mitosis);GO:0000381(regulation of alternative nuclear mRNA splicing, via spliceosome)	[R] General function prediction only	-	-	0	0	0	0	1.75	0.11	0	48.5	0	0	0	0	0.58	0	0	33.98
TRINITY_DN1036_c0_g1	612	413	-	-	-	-	-	-	1.19	0.7	0.14	0	0.23	0.05	0.1	0	0.65	0.1	0	0	0.28	0	0	0
TRINITY_DN1036_c0_g2	410	211	-	-	-	-	-	-	7.52	1.16	1.13	0	6.53	0.88	0	0	4.09	4.61	0	0	3.47	1.48	0	0
TRINITY_DN10370_c0_g1	1320	951.16	At2g20760	-	-	-	-	-	0.9	0.4	1.28	3.83	0.68	0.27	0.32	3.02	1.16	0.59	1.01	3.51	0.74	0.81	0.52	1.74
TRINITY_DN10371_c0_g1	1224	1025	TT1	-	GO:0005634(nucleus);GO:0003676(nucleic acid binding);GO:0003700(sequence-specific DNA binding transcription factor activity);GO:0008270(zinc ion binding);GO:0009813(flavonoid biosynthetic process)	[R] General function prediction only	-	-	0.71	0	0	0	3.56	0.13	0	0	2.82	0.1	0	0	0	0	0	0
TRINITY_DN10371_c0_g2	498	299	TT1	-	GO:0005634(nucleus);GO:0003676(nucleic acid binding);GO:0003700(sequence-specific DNA binding transcription factor activity);GO:0008270(zinc ion binding);GO:0009813(flavonoid biosynthetic process)	[R] General function prediction only	-	-	0	0.07	0	0	0.57	0.06	0	0	1.05	0.34	0	0	0	0	0	0
TRINITY_DN10371_c0_g3	809	610	TT1	-	GO:0005634(nucleus);GO:0003676(nucleic acid binding);GO:0003700(sequence-specific DNA binding transcription factor activity);GO:0008270(zinc ion binding);GO:0009813(flavonoid biosynthetic process)	[R] General function prediction only	-	-	0.09	0.2	0	0	1.55	0	0	0	0	0.02	0	0	0.91	0	0	0
TRINITY_DN10373_c0_g1	216	31.43	-	-	-	[R] General function prediction only	-	-	8.71	6.51	0.83	0	3.34	0.75	2.85	0	3.84	6.41	2.64	0	7.89	2.86	2.03	0
TRINITY_DN10374_c0_g1	477	278	-	transcription initiation factor TFIID subunit D8	-	-	K03134	ko03022(Basal transcription factors)	2.08	1.04	0.27	0	0.73	0.91	0.38	0.61	0.62	0.92	0.53	0	1.39	1.29	0.61	0
TRINITY_DN10374_c0_g2	288	89.2	-	transcription initiation factor TFIID subunit D8	-	-	K03134	ko03022(Basal transcription factors)	0.81	0	0	0	0.83	0.28	0	0	0.41	0.11	0	0	0	0.48	0	0
TRINITY_DN10375_c1_g1	272	74.24	-	-	-	-	-	-	3.68	0.28	1.75	0	3.72	0	0.57	0	5.08	0	0	0	0	0.47	0	0
TRINITY_DN10376_c0_g1	383	184	-	-	-	-	-	-	2.17	0.22	2.62	1.41	0	2.22	1.39	3.5	1.43	1.55	0.6	4.63	0.2	1.7	0.19	0
TRINITY_DN10377_c0_g1	1031	832	-	-	-	-	-	-	2.32	0.25	0.13	1.19	0.75	0.4	0.03	2.14	2.74	0.19	0.18	0.43	1.8	0.42	0.25	0
TRINITY_DN10378_c0_g1	234	43.32	-	-	-	-	-	-	3.4	0	0	0	7.97	0.43	0	0	0	0	0	0	0	0	0.39	0
TRINITY_DN10378_c0_g2	236	44.76	-	-	-	-	-	-	0	2.77	0	0	0	0.42	0	0	13.05	1.99	0	0	2.88	3.11	0	0
TRINITY_DN10379_c0_g1	217	32.04	-	-	-	-	-	-	4.59	1.93	0	0	7.19	0.58	0	0	3.53	0	0	0	0	0.54	0	56.5
TRINITY_DN10379_c1_g1	270	72.44	-	-	-	[R] General function prediction only	-	-	0	1.42	0	0	1.27	1.54	0	0	0.26	0	0	0	0	2.16	0	0
TRINITY_DN10380_c0_g1	632	433	-	-	-	-	-	-	2.62	1.52	0.26	2.84	0.74	1.2	1.08	3.32	1.35	1.03	1.18	11.92	1.58	1.21	0.98	0
TRINITY_DN10381_c0_g1	1250	1039.82	Nek8	-	GO:0005737(cytoplasm);GO:0072372(primary cilium);GO:0005524(ATP binding);GO:0046872(metal ion binding);GO:0005515(protein binding);GO:0004674(protein serine/threonine kinase activity)	-	-	-	2.17	1.7	0.49	1.3	0.66	1.3	0.76	0.81	1.2	0.9	0.42	0	1.76	0.66	0.52	0
TRINITY_DN10382_c0_g1	299	100	-	-	-	[O] Posttranslational modification, protein turnover, chaperones	-	-	0.99	0	0	0	0	0	0	0	0.44	0.18	0	0	0	0	0	0
TRINITY_DN10382_c0_g2	367	168	-	-	-	[O] Posttranslational modification, protein turnover, chaperones	-	-	0.91	0	0.33	3.71	0	0	0	0.68	0.64	0	0.54	0	0	0	0	0
TRINITY_DN10383_c0_g1	295	96.03	-	-	-	-	-	-	0	0	0	0	0	0	0.22	0	0	0	0	0	0.77	3.62	0.35	0
TRINITY_DN10383_c0_g2	295	96.03	-	-	-	-	-	-	0	0	0	0	0	0	0	8.87	0	0	0	0	0	0	0	0
TRINITY_DN10384_c0_g1	765	566	-	-	-	-	-	-	0.63	0.15	0	0.73	0.41	0.3	0.23	0.64	0.2	0.28	0.19	0	0.68	0.18	0.6	0
TRINITY_DN10384_c1_g1	1194	995	-	-	-	-	-	-	0.87	0.17	0	0.61	0.37	0.21	0.32	0.15	0.68	0.38	0.04	0	0.5	0.24	0.15	0
TRINITY_DN10384_c2_g1	516	317	-	-	-	[R] General function prediction only	-	-	0.46	0.13	0	0	0	0.47	0.07	0	0.48	0	0.52	0	1.11	0.49	0.05	0
TRINITY_DN10385_c0_g1	294	89.31	-	-	-	-	-	-	2.09	0.48	0.43	0	0.8	0.2	0	0	6.55	0.62	0.42	0	2.91	0.2	0	0
TRINITY_DN10386_c0_g1	433	234	-	-	-	-	-	-	8.1	0.18	0.4	6.06	0	6.91	0.36	7.77	1.77	4.54	0.7	24.19	0	3.7	2.33	4.5
TRINITY_DN10386_c0_g2	434	235	-	-	-	-	-	-	0.79	0	0	1.19	0	0.23	0	0	0	0.33	0	0.16	0	0.69	0	0
TRINITY_DN10387_c0_g1	771	572	-	-	-	-	-	-	12.13	4.62	3.28	10.71	14.35	2.76	0	15.03	6.23	4.5	0	0	1.14	9.26	0	0
TRINITY_DN10387_c0_g2	772	573	-	-	-	-	-	-	0	0.64	5.54	1.04	11.95	0	5.46	9.18	0	1.38	3.1	44.25	2.53	8.86	7.79	38.02
TRINITY_DN10388_c0_g1	857	658	RCOM_0679870	-	GO:0016021(integral to membrane);GO:0005886(plasma membrane)	-	-	-	0	0.06	1.81	19.9	0	0	0.06	6.5	0	0.05	0.03	14.36	0	0.05	0.36	11.68
TRINITY_DN10389_c0_g1	559	360	FIM1	-	GO:0005737(cytoplasm);GO:0005856(cytoskeleton);GO:0003779(actin binding);GO:0005509(calcium ion binding);GO:0007623(circadian rhythm)	[Z] Cytoskeleton	-	-	1.87	0.11	0.72	0.19	2.11	0.21	1	0	2.45	0.59	0.1	0	0.41	0.29	0.28	0
TRINITY_DN1038_c0_g1	236	44.76	-	-	-	-	-	-	0	0	0	0	0	0.83	0	0	0	0	0	0	0.67	0	0	0
TRINITY_DN1038_c0_g2	281	82.54	-	-	-	-	-	-	0.76	1.25	0	0	0	0	0.52	0	1.6	1.29	0	0	0.53	0	0.21	0
TRINITY_DN10390_c0_g1	324	125	-	-	-	-	-	-	4.71	1.65	1.19	0	4.42	0.45	0.34	1.51	3.62	3.71	0.29	0	0.59	0.97	0.68	0
TRINITY_DN10391_c0_g1	667	468	-	-	-	-	-	-	0.66	0.62	0.36	0.07	0.1	0.48	1.05	0.16	1.56	0.44	0.27	0	0.98	0.59	0.76	0
TRINITY_DN10391_c0_g2	667	468	-	-	-	-	-	-	1.32	0	0	0.07	0.1	0.48	0	0	0.17	0.74	0.27	0	0.48	0.79	0	0
TRINITY_DN10392_c0_g1	432	233	-	-	-	-	-	-	1.71	0.71	1.83	0	1.19	0.4	0.91	0.32	3.15	0.84	0	0	1.35	1.2	0.22	0
TRINITY_DN10393_c0_g1	1178	979	MED37C	heat shock 70kDa protein 1/8	GO:0005618(cell wall);GO:0005829(cytosol);GO:0005739(mitochondrion);GO:0005886(plasma membrane);GO:0005774(vacuolar membrane);GO:0005524(ATP binding);GO:0031625(ubiquitin protein ligase binding);GO:0016567(protein ubiquitination);GO:0009617(response to bacterium);GO:0046686(response to cadmium ion);GO:0009408(response to heat);GO:0009644(response to high light intensity);GO:0042542(response to hy…	[O] Posttranslational modification, protein turnover, chaperones	K03283	ko03040(Spliceosome);ko04010(MAPK signaling pathway);ko04144(Endocytosis);ko04612(Antigen processing and presentation)	0	0.17	7.96	8.63	1.18	0.36	1.74	16.07	0	0.07	7.11	13	0	0.62	5.11	16.42
TRINITY_DN10393_c0_g2	808	609	MED37C	heat shock 70kDa protein 1/8	GO:0005618(cell wall);GO:0005829(cytosol);GO:0005739(mitochondrion);GO:0005886(plasma membrane);GO:0005774(vacuolar membrane);GO:0005524(ATP binding);GO:0031625(ubiquitin protein ligase binding);GO:0016567(protein ubiquitination);GO:0009617(response to bacterium);GO:0046686(response to cadmium ion);GO:0009408(response to heat);GO:0009644(response to high light intensity);GO:0042542(response to hy…	[O] Posttranslational modification, protein turnover, chaperones	K03283	ko03040(Spliceosome);ko04010(MAPK signaling pathway);ko04144(Endocytosis);ko04612(Antigen processing and presentation)	0.07	0.11	0	1.37	0	0.61	0	10.85	0.19	0	0	0	0.06	0.24	0.45	9.86
TRINITY_DN10394_c0_g1	392	193	-	-	-	-	-	-	0.11	0	0.29	0	0	0.1	0.44	0	0	0	0	0	0	0	0.53	9.16
TRINITY_DN10394_c0_g2	212	29.05	-	-	-	-	-	-	0	0	0	0	0	0	0	7.82	0	0	0.63	0	0	0	0	0
TRINITY_DN10395_c0_g1	452	253	-	-	-	-	-	-	2.99	1.14	1.32	0.89	8.01	1.03	1.51	0.15	2.16	1.97	0.22	1.95	1.6	1.65	0.27	7.57
TRINITY_DN10396_c0_g1	780	581	-	-	-	-	-	-	1.63	0.07	0.48	0.54	0.95	0.16	0.22	3.65	1.46	0.58	0.16	0.77	0.76	0.3	0.59	0
TRINITY_DN10397_c0_g1	1480	1121.4	-	-	-	-	-	-	1.72	0.54	0.16	3.4	1.01	0.46	0.43	0.69	0.93	0.54	0.4	0	1.2	0.6	0.16	0
TRINITY_DN10397_c0_g2	250	55.45	-	-	-	[R] General function prediction only	-	-	0.7	0.14	1	0	0	0	0	0	0	0.64	0	12.14	0	1.88	0.31	0
TRINITY_DN10398_c0_g1	350	151	-	-	-	-	-	-	1.81	0	0	1.15	3.51	0.62	0	0.5	2.25	0.24	0	2.67	1.47	0.81	0	0
TRINITY_DN10399_c0_g1	261	64.57	CLPB1	ATP-dependent Clp protease ATP-binding subunit ClpB	GO:0005829(cytosol);GO:0005634(nucleus);GO:0005524(ATP binding);GO:0017111(nucleoside-triphosphatase activity);GO:0005515(protein binding);GO:0043335(protein unfolding);GO:0009408(response to heat);GO:0009644(response to high light intensity);GO:0042542(response to hydrogen peroxide)	[O] Posttranslational modification, protein turnover, chaperones	K03695	-	11.07	0.96	0	0	4.64	15.26	2.31	0	2.34	1.1	0	0	5.14	5.12	0.26	0
TRINITY_DN1039_c0_g1	778	579	-	-	-	-	-	-	0.29	0.25	0.41	0	0	0.02	0.29	0.33	0	0	0.28	0	0	0.39	0.16	0
TRINITY_DN1039_c0_g2	700	501	-	-	-	-	-	-	0	0	0.24	2.39	0	0.05	0	0	0.49	0.04	0	2.91	0	0	0.29	0
TRINITY_DN103_c0_g1	736	537	-	-	-	-	-	-	0.39	0.85	0.35	0.55	0.6	0.17	0.36	0.21	0.21	0	0.37	0	0.34	0.23	0.25	0
TRINITY_DN10400_c0_g1	235	44.04	-	-	-	-	-	-	0	0.6	0	0	0	0	0	0	0	0	0	0	0	0	0	0
TRINITY_DN10400_c0_g2	255	59.52	-	-	-	-	-	-	0	1.64	0	0	0	0	0	12.72	0	0.6	0.61	7.16	0	0	0.29	0
TRINITY_DN10401_c0_g1	245	51.51	-	-	-	[R] General function prediction only	-	-	1.63	2.4	1.44	0	7.15	0.72	0	0	1.46	0.69	0	0	0	1.01	0	0
TRINITY_DN10402_c0_g1	638	439	-	-	-	-	-	-	2.01	1.13	0.55	0.39	1.89	0.25	0.39	0.69	1.8	0.77	0.21	0	1.97	0.12	0.31	0
TRINITY_DN10403_c0_g1	601	402	UGT85A1	limonoid glucosyltransferase	GO:0050502(cis-zeatin O-beta-D-glucosyltransferase activity);GO:0050403(trans-zeatin O-beta-D-glucosyltransferase activity)	[G] Carbohydrate transport and metabolism ;[C] Energy production and conversion	K08236	-	0.1	0	3.09	5.08	0	0	0	0.69	0	0	0.86	1.62	0	0	0	0
TRINITY_DN10403_c1_g1	528	329	UGT85A1	-	GO:0050502(cis-zeatin O-beta-D-glucosyltransferase activity);GO:0050403(trans-zeatin O-beta-D-glucosyltransferase activity)	[G] Carbohydrate transport and metabolism ;[C] Energy production and conversion	-	-	0	0	1.98	2.32	0	0	0	1.04	0	0	0.67	1.71	0	0	0	0
TRINITY_DN10404_c0_g1	332	133	-	-	-	[R] General function prediction only	-	-	0	0.16	0	0	0	0	0	0	0	0	0	6.92	0	0.26	0.13	0
TRINITY_DN10404_c0_g2	801	602	TY3B-I	-	GO:0005737(cytoplasm);GO:0005634(nucleus);GO:0004190(aspartic-type endopeptidase activity);GO:0005524(ATP binding);GO:0003677(DNA binding);GO:0003887(DNA-directed DNA polymerase activity);GO:0004523(ribonuclease H activity);GO:0003723(RNA binding);GO:0003964(RNA-directed DNA polymerase activity);GO:0008270(zinc ion binding);GO:0015074(DNA integration);GO:0006310(DNA recombination);GO:0006278(RNA-…	[R] General function prediction only	-	-	0.22	0.27	0	2.68	0.19	0.09	0.14	2.21	1.16	0.03	0.06	0	0.66	0.22	0.37	0
TRINITY_DN10404_c0_g3	1030	831	TY3B-G	-	GO:0005737(cytoplasm);GO:0005634(nucleus);GO:0004190(aspartic-type endopeptidase activity);GO:0005524(ATP binding);GO:0003677(DNA binding);GO:0003887(DNA-directed DNA polymerase activity);GO:0004523(ribonuclease H activity);GO:0003723(RNA binding);GO:0003964(RNA-directed DNA polymerase activity);GO:0008270(zinc ion binding);GO:0015074(DNA integration);GO:0006310(DNA recombination);GO:0006278(RNA-…	[R] General function prediction only	-	-	0.2	0	0	1.33	0	0	0	0.29	0	0.15	0	0	0.03	0.11	0	0
TRINITY_DN10405_c0_g1	422	223	-	-	-	-	-	-	0.59	0	0.09	0	0.31	0.42	0.1	0	0.97	0	0.08	0	0	0.55	0.15	0
TRINITY_DN10405_c0_g2	341	142	-	-	-	-	-	-	0.26	0	0.13	0	0	0	0	0	1.14	0	0	2.21	0.26	0	0	0
TRINITY_DN10406_c0_g1	1710	1511	PUB9	-	GO:0005634(nucleus);GO:0005886(plasma membrane);GO:0000151(ubiquitin ligase complex);GO:0070696(transmembrane receptor protein serine/threonine kinase binding);GO:0004842(ubiquitin-protein ligase activity);GO:0009738(abscisic acid mediated signaling pathway)	[S] Function unknown	-	-	2.89	1.92	1.44	0.79	2.65	1.66	2	0.58	1.15	1.1	2.19	0	1.81	1.37	2.67	0
TRINITY_DN10407_c0_g1	319	120	-	-	-	-	-	-	0	0.34	0	0	0	0	0	1.1	0	0	0	8.6	0.31	0	0.43	0
TRINITY_DN10407_c1_g1	201	23.03	-	-	-	-	-	-	0.91	0	0	0	0	0	0	5.75	4.09	0	0	0	0	0	0.74	0
TRINITY_DN10409_c0_g1	280	81.6	-	-	-	-	-	-	5.91	3.79	3.64	0	5.64	2.77	4.98	7.19	3.93	3.49	3.36	4.67	5.42	3.25	2.92	0
TRINITY_DN1040_c0_g1	911	712	ERF025	EREBP-like factor	GO:0005634(nucleus);GO:0003677(DNA binding);GO:0003700(sequence-specific DNA binding transcription factor activity);GO:0050832(defense response to fungus);GO:0009873(ethylene mediated signaling pathway)	-	K09286	-	0	0	0	0	0	0	0	5.71	0	0	0	4.29	0	0	0	0
TRINITY_DN1040_c0_g2	901	702	ERF025	EREBP-like factor	GO:0005634(nucleus);GO:0003677(DNA binding);GO:0003700(sequence-specific DNA binding transcription factor activity);GO:0050832(defense response to fungus);GO:0009873(ethylene mediated signaling pathway)	-	K09286	-	0	0	0	0	0	0	0	7.26	0	0	0	0	0	0.05	0	0
TRINITY_DN10410_c0_g1	855	656	-	-	-	[S] Function unknown	-	-	39.6	13.27	20.69	31.29	42.5	14.45	25.46	34.98	51.46	13.22	14	21.89	39.88	15.04	22.97	56.28
TRINITY_DN10411_c0_g1	222	35.18	VEP1	-	-	-	-	-	0.6	0	0	3.45	0	0	0	0	0	0	0	35.72	0	0.49	0.97	0
TRINITY_DN10412_c0_g1	392	193	-	-	-	-	-	-	0.87	0.11	0	0	1.43	0.29	0.22	0	2.34	0.18	0.19	2.91	0.96	0	0	0
TRINITY_DN10413_c0_g1	346	147	-	-	-	-	-	-	0.29	0.14	0.76	1.89	1.88	0	0.29	1.93	0.13	0.24	0.12	0	0.25	0	0.35	0
TRINITY_DN10414_c0_g1	516	317	-	Cdc2-related kinase, arginine/serine-rich	-	-	K08819	-	0.93	0	0	0.11	0.8	0.29	0	0	1.01	0	0	0	0.23	0	0.21	0
TRINITY_DN10414_c0_g2	493	294	-	-	-	-	-	-	0	0.28	0	0.12	0	0	0.07	0.06	0	0	0	0	0	0.59	0	0
TRINITY_DN10415_c0_g1	332	133	-	-	-	-	-	-	0	0	0.71	0	0	0.24	1.12	0	0	0.13	0.55	0	0	1.05	0	0
TRINITY_DN10415_c0_g2	328	129	-	-	-	-	-	-	0	0.64	1.14	0	0	0.76	0	1.32	0.58	0	0	0	0	0	0.26	0
TRINITY_DN10416_c0_g1	602	403	-	-	-	-	-	-	0.94	0.46	0.18	0	1.71	0.88	1.27	0.8	0.56	0.22	0.64	0	2.29	1.86	0.97	0
TRINITY_DN10417_c0_g1	259	62.86	-	-	-	-	-	-	21.06	0.98	5.91	5.24	8.06	3.25	3.38	12.65	6.6	3.4	0.87	6.43	0.59	2.77	2.98	9.71
TRINITY_DN10418_c0_g1	391	192	-	-	-	-	-	-	0	0.64	0.39	2.98	0	2.52	1	0.2	0.39	1.02	0.29	4.56	2.3	0.82	0.89	0
TRINITY_DN10419_c0_g1	693	494	-	-	-	-	-	-	1.28	0.29	0.83	0.56	1.03	0.6	0.69	1.23	2.25	0.43	0.3	0	2.46	1.06	0.38	0
TRINITY_DN1041_c0_g1	261	64.57	-	-	-	-	-	-	0	0.59	0.4	0	0	0	0	0	0.79	0	0.44	0	0	0	0.63	0
TRINITY_DN1041_c0_g2	673	474	-	-	-	-	-	-	0.18	0.27	0.22	0	0.29	0.55	0.4	0	0.25	0.04	0.13	0	0.47	0.44	0.35	0
TRINITY_DN10420_c0_g1	208	26.77	-	-	-	-	-	-	0	0.77	0	0	0	0	0	0	0	2	0	0	0	0.65	0	0
TRINITY_DN10420_c0_g2	289	90.17	-	-	-	-	-	-	0.31	0	0.41	2.5	0	0	0	0	0.84	0	0	0	0	1.93	0	0
TRINITY_DN10420_c0_g3	381	182	-	-	-	-	-	-	0.19	1.13	0	0	0	1.02	0.7	2.5	0	0	0.2	0	0.61	0	0.09	0
TRINITY_DN10421_c0_g1	287	88.24	-	-	-	-	-	-	0	0	0	0	0	2.11	0.48	0	0	0	0	0	0	0	0.77	0
TRINITY_DN10421_c0_g2	287	88.24	-	-	-	-	-	-	2.86	1.64	0.21	0	0.78	1.9	0.72	2.57	0.85	1.01	0	0	2.72	0.59	0	0
TRINITY_DN10422_c0_g1	570	371	-	-	-	-	-	-	0.45	0.44	0.15	0	1.24	0.35	0.23	0.97	0.3	0.24	0.49	0	0.1	0.33	0.32	0
TRINITY_DN10423_c0_g1	476	277	-	-	-	-	-	-	12.22	9.27	6.83	15.45	15.94	10.4	8.79	14.83	12.59	9.97	7.79	17.25	24.97	7.98	8.13	0
TRINITY_DN10424_c0_g1	461	262	-	-	-	-	-	-	0	0.08	0	0	0.7	0	0	1.82	0	0.17	0.28	0	0	0	0.03	0
TRINITY_DN10424_c0_g2	461	262	-	-	-	-	-	-	0.24	0.08	0	3.5	0	0.64	0.32	1.58	0.72	0.17	0	0	0.42	0.6	0.03	0
TRINITY_DN10425_c0_g1	268	70.66	-	-	-	-	-	-	0	1.17	1.32	0	3.26	0	0	0	14.75	2.27	2.07	0	0	0	0	0
TRINITY_DN10425_c0_g2	268	70.66	-	-	-	-	-	-	1.34	0	0.52	0	3.59	1.32	0	0	0	0.75	0	0	2.61	0	0	0
TRINITY_DN10425_c0_g3	268	70.66	-	-	-	-	-	-	0.45	0	0	0	0	0	0	2.95	0.72	0	0	0	0	0	1.69	0
TRINITY_DN10426_c0_g1	945	746	PNC1	-	-	[C] Energy production and conversion	-	-	2.08	0	0	2.17	6.59	0	0.33	0	4.03	0	0.13	9.62	0.54	0	0.2	17.32
TRINITY_DN10426_c0_g2	1486	1287	PNC1	-	-	[C] Energy production and conversion	-	-	9.82	2.52	2.9	11.41	5.88	2.17	3.3	8.55	9.47	2.81	1.5	1.59	6.82	1.66	3.15	0
TRINITY_DN10427_c0_g1	564	365	-	-	-	-	-	-	0	0.52	0	0	0	0	0	2.3	0	0	0	0	0.26	0	0	0
TRINITY_DN10427_c0_g2	1346	1147	-	-	-	-	-	-	0.49	0	0	8.01	0.4	0.13	1.01	0.11	1.66	0.25	0	6.73	0	0	1.74	0.51
TRINITY_DN10427_c0_g3	1346	1147	-	-	GO:0050643(10-deacetylbaccatin III 10-O-acetyltransferase activity);GO:0042617(paclitaxel biosynthetic process)	-	-	-	0	0.57	0	0	0	0	0	3.58	0	0	0	0	0	0	0	0.76
TRINITY_DN10428_c0_g1	377	178	-	-	-	-	-	-	0	0	0.1	0	0.26	0	0	0	0	0	0.21	0.5	2.07	0	0.48	0
TRINITY_DN10428_c0_g2	408	209	-	-	-	-	-	-	1.51	0.49	0	0	0	0	0.2	3.71	1.26	0	0	0	0	0.08	0	0
TRINITY_DN10429_c0_g1	497	298	-	-	-	-	-	-	1.27	0.28	0.5	1.74	0.77	0.94	0	0.76	0.44	0.96	0.12	0	0.12	0.41	0.46	0
TRINITY_DN10429_c1_g1	435	236	-	-	-	-	-	-	0.62	0.52	0.31	0	0.1	0.16	0	0	0.64	0.45	0.23	0	1.09	0.22	0.94	0
TRINITY_DN1042_c0_g1	469	270	-	-	-	-	-	-	1.51	0	0.14	0	0.6	0.14	0.32	0.14	0.72	0.07	0.2	0	1.23	0.71	0.07	0
TRINITY_DN1042_c0_g2	208	26.77	-	-	-	-	-	-	3.62	0	0	0	0	0	0	0	6.83	0	0	0	0	0	0.56	0
TRINITY_DN10430_c0_g1	1135	936	-	-	-	-	-	-	1.24	0.29	0.2	1.39	1.23	0.34	0.32	0.89	3.12	0.57	0.16	0	2.82	0	0.22	0
TRINITY_DN10431_c0_g1	1162	963	-	-	-	[R] General function prediction only	-	-	0.5	1.05	0.25	0	0.55	0.37	0.02	0.47	0.47	0.91	0.27	0	0	0.2	0.23	0
TRINITY_DN10431_c1_g1	621	422	-	-	-	[R] General function prediction only	-	-	1.39	0.54	0.04	0.74	1.09	0.48	0.15	0	0.31	0.72	0.17	0	0	0.04	0.16	0
TRINITY_DN10432_c0_g1	206	25.67	-	-	-	-	-	-	0	0	0	0	5.85	0	0	0	0	0	0	0	0	0.62	0	0
TRINITY_DN10432_c0_g2	470	271	-	-	-	-	-	-	0.31	0.38	0	0	0.55	0.07	0	0.35	0.56	0.79	0.07	0	0.82	0.13	0	0
TRINITY_DN10433_c0_g1	1219	1020	PCMP-H6	-	GO:0005488(binding)	[R] General function prediction only	-	-	1.15	0.04	0.36	1.34	1.2	0.22	0.69	1.41	2.25	0.21	0.29	0	1.41	0.26	0.25	0
TRINITY_DN10434_c0_g1	625	426	ALDH3I1	aldehyde dehydrogenase (NAD+)	GO:0009507(chloroplast);GO:0004029(aldehyde dehydrogenase (NAD) activity);GO:0004030(aldehyde dehydrogenase [NAD(P)+] activity);GO:0006081(cellular aldehyde metabolic process);GO:0009737(response to abscisic acid stimulus);GO:0009414(response to water deprivation)	[C] Energy production and conversion	K00128	ko00010(Glycolysis / Gluconeogenesis);ko00053(Ascorbate and aldarate metabolism);ko00071(Fatty acid metabolism);ko00280(Valine, leucine and isoleucine degradation);ko00310(Lysine degradation);ko00330(Arginine and proline metabolism);ko00340(Histidine metabolism);ko00380(Tryptophan metabolism);ko00410(beta-Alanine metabolism);ko00561(Glycerolipid metabolism);ko00620(Pyruvate metabolism);ko00631(1,…	1.18	0	0	0.12	0.22	0	0	0	1.64	0.08	0	0	0.91	0.08	0	0
TRINITY_DN10435_c0_g1	2438	2239	CLPB3	ATP-dependent Clp protease ATP-binding subunit ClpB	GO:0005739(mitochondrion);GO:0005524(ATP binding);GO:0017111(nucleoside-triphosphatase activity)	[O] Posttranslational modification, protein turnover, chaperones	K03695	-	10.34	7.58	6.83	27.48	18.76	9.78	5.62	27.01	12.43	4.57	5.46	11.28	25.83	6.3	8.31	12.36
TRINITY_DN10436_c0_g1	452	253	-	-	-	-	-	-	0	0	0	0	2.09	0.22	0	0.82	0.97	0.14	0.07	0	0	0.28	0	0
TRINITY_DN10436_c0_g2	494	295	-	-	-	-	-	-	0.93	0.07	0	0	0	0	0	0	0	0.43	0	0	0.63	0	0.23	0
TRINITY_DN10437_c0_g1	622	423	-	-	-	-	-	-	1.59	0.24	0	0	0	0.66	0.15	0.18	1.47	0.76	0.09	0	0.52	0.25	0	0
TRINITY_DN10437_c1_g1	284	85.37	-	-	-	-	-	-	1.23	0	0	2.03	0	0.22	0.5	0	0	0.42	0	0	0	0.2	0.4	0
TRINITY_DN10438_c0_g1	352	153	-	-	-	-	-	-	2.88	0.81	0.24	0	2.26	1.09	0	0	3.33	0.7	0.48	4.25	1.21	0.23	0	0
TRINITY_DN10439_c1_g1	905	706	PDAP1	-	GO:0008283(cell proliferation);GO:0007165(signal transduction)	[R] General function prediction only	-	-	184.71	61.04	61.09	104.17	192.78	76.98	97.21	107.84	186.59	56.94	50.73	119.67	153.67	71.96	84.34	160.67
TRINITY_DN1043_c0_g1	269	71.55	-	-	-	-	-	-	0.29	0.86	0	0	2.57	0	0	0	1.58	0.5	0	0	1.55	0	0	0
TRINITY_DN10440_c0_g1	261	64.57	-	-	-	-	-	-	0	0.32	4.01	0	0	0	0	0	0	0	0	0	0	0	0	0
TRINITY_DN10440_c0_g2	261	64.57	-	-	-	-	-	-	0	0	0	0	0	0	1.65	0	0	0	0	0	0	0.27	2.46	0
TRINITY_DN10440_c0_g3	261	64.57	-	-	-	-	-	-	0	0.32	0.3	0	0	0	0.66	1.47	0	0	0.28	0	0	0.81	1.23	0
TRINITY_DN10441_c0_g1	486	287	-	-	-	-	-	-	3.22	0	0.32	2.35	0.32	1.75	0.22	0.13	3.87	2.11	0.64	0	1.93	1.03	0.36	0
TRINITY_DN10442_c0_g1	211	28.47	-	-	-	-	-	-	9.49	7.24	1.3	0	20.21	2.61	5.98	0	7.28	5.63	1.28	33.89	8.42	4.89	6.58	0
TRINITY_DN10442_c0_g2	213	29.64	-	-	-	-	-	-	1.52	0	0	0	0	0	0	0	0.64	0	0	0	0	0	0	66.76
TRINITY_DN10444_c0_g1	331	132	-	-	-	-	-	-	9.44	0.16	0.68	0	4.58	0.54	2.34	0	5.35	0.46	0	0	9.26	0.96	0.64	0
TRINITY_DN10444_c0_g2	908	679.17	FKBP13	peptidylprolyl isomerase	GO:0009543(chloroplast thylakoid lumen);GO:0003755(peptidyl-prolyl cis-trans isomerase activity);GO:0005515(protein binding);GO:0006457(protein folding)	[O] Posttranslational modification, protein turnover, chaperones	K01802	-	32.14	2.73	2.84	0.9	38.18	3.2	2.72	1.71	32.5	5.01	2.43	0.06	27.6	4.05	3.56	0
TRINITY_DN10445_c0_g1	889	690	PCMP-A4	-	GO:0005488(binding)	[R] General function prediction only	-	-	0.52	0.48	0.05	0	0.23	0.16	0.25	0.74	0.41	0	0.27	0	0.16	0.25	0.39	0
TRINITY_DN10446_c0_g1	217	32.04	-	-	-	-	-	-	5.11	1.24	0.54	2.16	7.87	1.15	0.33	0	15.41	2.22	0	25.68	16.96	4.55	1.27	0.66
TRINITY_DN10446_c0_g2	218	32.65	-	-	-	-	-	-	0.64	1.9	1.14	10.08	0	0	0	0	0	0	0	0	0	0	0	0
TRINITY_DN10447_c0_g1	1704	1505	SPBC29A3.03c	-	GO:0005829(cytosol);GO:0034657(GID complex);GO:0005634(nucleus);GO:0008270(zinc ion binding);GO:0033554(cellular response to stress);GO:0045721(negative regulation of gluconeogenesis);GO:0043161(proteasomal ubiquitin-dependent protein catabolic process)	[O] Posttranslational modification, protein turnover, chaperones	-	-	22.3	9.68	11.14	23.21	23.92	9.65	12.89	23.37	24.17	9.44	7.77	48.37	21.45	9.96	13.32	40.03
TRINITY_DN10448_c0_g1	354	155	-	-	-	-	-	-	1.63	0.53	0.24	0	2.67	0.12	0	0	1.34	0.34	0.24	0	1.19	0.22	0.33	0
TRINITY_DN10449_c0_g1	639	440	-	-	-	-	-	-	0.9	0	0	0	6.34	0	0	0	0.28	1.08	0	2.29	2.38	0.17	0.16	0
TRINITY_DN10449_c0_g2	1109	910	-	-	-	-	-	-	0.71	0	0	1.29	1.45	0.22	0.74	0.44	0.42	0.76	0.38	0	1.18	0.76	0.24	0
TRINITY_DN10449_c0_g3	1473	1274	-	-	-	-	-	-	5.29	1.86	1.17	0	3.53	1.68	0.93	0	7.61	0.79	0.92	1.06	2.5	0.94	0.86	0
TRINITY_DN1044_c0_g1	469	270	-	-	-	-	-	-	4.13	1.76	0.55	0.45	10.15	0.76	1.26	0.14	4.82	2.18	0.14	2.16	1.5	1.8	1.01	0
TRINITY_DN10450_c0_g1	506	307	-	-	-	-	-	-	1.67	0.07	0	0	0.42	0	0	0	0.44	0.12	0	0	0.96	0	0	0
TRINITY_DN10450_c0_g2	221	34.54	-	-	-	-	-	-	1.62	0	0	0	2.97	0	0	0	0.44	0	0	0	0	0	0	0
TRINITY_DN10451_c0_g1	1467	1268	HMA2	Zn2+-exporting ATPase	GO:0016021(integral to membrane);GO:0005886(plasma membrane);GO:0005524(ATP binding);GO:0008551(cadmium-exporting ATPase activity);GO:0046872(metal ion binding);GO:0016463(zinc-exporting ATPase activity);GO:0006754(ATP biosynthetic process);GO:0055069(zinc ion homeostasis)	[P] Inorganic ion transport and metabolism	K01534	-	0.81	0.21	0.15	0	0.36	0.18	0.44	0.75	1.16	0.24	0.14	1.91	0.47	0.18	0.12	0
TRINITY_DN10452_c0_g1	207	26.22	-	-	-	-	-	-	1.6	0	0	0	3.51	0	0	0	0	0	0	0	7.03	0	0.98	0
TRINITY_DN10452_c0_g2	209	27.33	-	-	-	-	-	-	0	0	0	18.38	0	0	0	0	13.1	0	0	0	0	0	0.93	0
TRINITY_DN10453_c0_g1	1036	837	WAK1	-	GO:0016021(integral to membrane);GO:0009505(plant-type cell wall);GO:0005773(vacuole);GO:0005524(ATP binding);GO:0005509(calcium ion binding);GO:0005515(protein binding);GO:0004674(protein serine/threonine kinase activity);GO:0007166(cell surface receptor linked signaling pathway);GO:0050832(defense response to fungus);GO:0009751(response to salicylic acid stimulus);GO:0009615(response to virus)	-	-	-	1.07	0	0	0	0	0.01	0.02	0	11.61	0.01	0	0	0	0.04	0	0
TRINITY_DN10453_c0_g2	1036	837	-	-	-	-	-	-	0.53	0	0	0	0.88	0.01	0.02	0	0	0.01	0	0	0	0.04	0	0
TRINITY_DN10453_c0_g3	1036	837	-	-	-	-	-	-	0	0	0	0	0.22	0.01	0.02	0	0.93	0.01	0.13	0	0.44	0.04	0	0
TRINITY_DN10454_c0_g1	254	58.7	-	-	-	-	-	-	1.79	0	0	0	0	0.32	0	3.23	2.25	0.61	1.56	0	0	0	1.45	0
TRINITY_DN10455_c0_g1	429	230	-	-	-	-	-	-	0	0.18	0.65	0	1	0.48	0	0	1.15	0	0.08	0	0	0	0.15	0
TRINITY_DN10455_c0_g2	430	231	-	-	-	-	-	-	1.27	0	0	0	0	0	0	0	0	0.69	0	0	2.16	0.15	0	0
TRINITY_DN10456_c0_g1	204	24.6	XTH24	xyloglucan:xyloglucosyl transferase	GO:0048046(apoplast);GO:0005737(cytoplasm);GO:0009505(plant-type cell wall);GO:0005886(plasma membrane);GO:0004553(hydrolase activity, hydrolyzing O-glycosyl compounds);GO:0016762(xyloglucan:xyloglucosyl transferase activity);GO:0006073(cellular glucan metabolic process);GO:0009828(plant-type cell wall loosening)	-	K08235	-	0	0	0	0	0	0	0	0	0	0	0	0	0	4.25	0	0
TRINITY_DN10456_c0_g2	224	36.47	XTH24	xyloglucan:xyloglucosyl transferase	GO:0048046(apoplast);GO:0005737(cytoplasm);GO:0009505(plant-type cell wall);GO:0005886(plasma membrane);GO:0004553(hydrolase activity, hydrolyzing O-glycosyl compounds);GO:0016762(xyloglucan:xyloglucosyl transferase activity);GO:0006073(cellular glucan metabolic process);GO:0009828(plant-type cell wall loosening)	-	K08235	-	2.88	0	0	0	0	0	0	4.15	0.52	0	0	0	0	4.77	0	0
TRINITY_DN10456_c0_g3	224	36.47	XTH24	xyloglucan:xyloglucosyl transferase	GO:0048046(apoplast);GO:0005737(cytoplasm);GO:0009505(plant-type cell wall);GO:0005886(plasma membrane);GO:0004553(hydrolase activity, hydrolyzing O-glycosyl compounds);GO:0016762(xyloglucan:xyloglucosyl transferase activity);GO:0006073(cellular glucan metabolic process);GO:0009828(plant-type cell wall loosening)	-	K08235	-	1.15	0	0	0	14.52	0	0	6.75	0	0	0	32.61	0	0	0	0
TRINITY_DN10457_c0_g1	212	29.05	-	-	-	-	-	-	3.25	0	0	0	2.38	0	1.46	0	10.27	0	0	0	2.17	0	0	0
TRINITY_DN10457_c0_g2	509	229.01	-	-	-	-	-	-	4.31	0.73	0	0	8.79	0.66	0	0	6.21	0.8	0.24	0	5.76	0.88	0	0
TRINITY_DN10458_c0_g1	219	33.27	-	-	-	-	-	-	3.79	0	0	0	0	0	0	0	7.93	0	0	0	3.32	0	0	0
TRINITY_DN10459_c0_g1	590	391	-	-	-	-	-	-	1.13	0.53	0.66	4.16	0.59	2.04	0.82	5.42	1.3	0.5	0.47	2.18	0.94	2.09	0.91	0
TRINITY_DN1045_c0_g1	673	474	-	-	-	-	-	-	0.53	0.17	0.63	0.73	0	0.12	0.54	1.2	0	0.15	0	0	0.19	0.07	0.14	0
TRINITY_DN10460_c0_g1	475	276	PCMP-H12	-	GO:0005488(binding);GO:0031425(chloroplast RNA processing)	[R] General function prediction only	-	-	0	0.37	0	0.5	0	0	1.39	3.43	1.37	0	0.66	3.82	0.73	0.25	0.8	0
TRINITY_DN10460_c0_g2	506	307	PCMP-H12	-	GO:0005488(binding);GO:0031425(chloroplast RNA processing)	[R] General function prediction only	-	-	0.48	0	0	0	0	0	0	0	0	0	0	0	0	0	0	0
TRINITY_DN10461_c0_g1	1779	1580	-	-	-	-	-	-	2.17	0.48	1.1	1.4	2.38	0.42	1.08	1.71	1.59	0.3	0.76	3.59	1.14	0.52	0.86	1.68
TRINITY_DN10462_c0_g1	1109	910	ASAT1	-	GO:0016021(integral to membrane);GO:0005515(protein binding);GO:0016746(transferase activity, transferring acyl groups);GO:0016127(sterol catabolic process);GO:0034434(sterol esterification)	-	-	-	0.34	0.29	0.17	0	2.36	2.58	0.31	0	0.06	0.78	0.24	0	3.65	0.44	0.03	0
TRINITY_DN10465_c0_g1	273	75.15	-	-	-	-	-	-	0	0	0	0	0	0	0	8.56	0	0	0	0	0	0	0	0
TRINITY_DN10465_c0_g2	529	330	-	-	-	-	-	-	0.06	1	0.45	0.89	0.28	0.06	0.26	0.75	0	0.86	0	4.01	0	0.32	0.05	0
TRINITY_DN10466_c0_g1	488	289	-	-	-	-	K06995	-	1.87	1	0	0	5.98	0.39	0	0	0.26	0.12	0	0	0.88	0.24	0	0
TRINITY_DN10466_c0_g2	300	101	-	-	-	-	K06995	-	1.53	0	0	0	3.18	0	0	0	0	0	0	0	0.04	0.18	0	0
TRINITY_DN10467_c0_g1	800	588.39	-	-	-	-	-	-	0.54	0.77	0.38	0.12	0	0.77	0.22	0.66	0.82	0.43	0.74	0.08	0.95	0.67	0.29	0
TRINITY_DN10468_c0_g1	223	35.82	-	-	-	-	-	-	1.3	0.38	0.89	0	0.33	1.94	0.44	0	0	0.5	0	0	0	0	0	0
TRINITY_DN10468_c0_g2	384	185	-	-	-	-	-	-	1.11	0.15	0.13	0	0.31	0.33	1.29	0	0.82	0.29	0.59	0	1.79	0.66	0.37	0
TRINITY_DN10469_c0_g1	615	406	-	-	-	-	-	-	0.68	0.25	0.05	3.81	0.23	0.18	0.59	1.42	0.75	0.21	0.09	1.51	0.37	0.08	0.21	6.37
TRINITY_DN1046_c0_g1	241	48.46	-	-	-	-	-	-	1.74	0	0	0	9.03	0.77	0	0	3.89	0	0	0	2.66	0.36	0	0
TRINITY_DN10470_c0_g1	889	690	-	-	-	-	-	-	0.33	0	0.25	0.43	0	0	0	0	0	0	0.24	0	0	0.07	0	0
TRINITY_DN10470_c0_g2	889	690	-	-	-	[R] General function prediction only	-	-	0.65	0.51	0.58	0.1	0	0.84	0	0	2.98	0.31	0	2.18	1.21	0.07	0.09	0
TRINITY_DN10470_c0_g3	889	690	-	-	-	-	-	-	0	0	0	0	1.3	0	0.49	0	0	0	0	0	0.47	0.07	0.53	0
TRINITY_DN10471_c0_g1	295	96.03	-	-	-	-	-	-	0	0	0	1.77	0	0	0	0	0	0.09	0	0	0	0	0	0
TRINITY_DN10471_c0_g2	744	545	-	-	-	-	-	-	0.46	0.57	0.34	0.42	0.25	0.78	0.08	3.72	0.03	0.25	0.03	0	0.58	0.1	0.28	0
TRINITY_DN10472_c0_g1	209	27.33	-	-	-	-	-	-	0.77	1.51	0	0	0	0	0	0	3.45	2.61	0	16.42	0	0	0	0
TRINITY_DN10473_c0_g1	1205	1006	-	-	-	-	-	-	1.15	1.05	0.35	1.02	1.01	1.96	0.7	1.51	1.5	0.94	0.67	1.29	1.59	1.25	0.73	2.3
TRINITY_DN10474_c0_g1	337	138	-	-	-	-	-	-	0.76	0	0.67	1	0.33	0	0	0	0	0	0	0	0	0	1.97	0.92
TRINITY_DN10475_c0_g1	448	249	-	-	-	-	-	-	0.68	0	0.82	0	0	0.22	0	0	1.74	0.14	0.15	0	0.3	0.28	0.07	0
TRINITY_DN10476_c0_g1	668	381.86	-	-	-	-	-	-	0.52	0.13	0.69	3.32	0	0.27	0.07	0.35	0.12	0.11	0.08	0	0	0.07	0.37	0
TRINITY_DN10478_c0_g1	523	324	-	-	-	-	-	-	1.56	0.25	0	0.1	0	0.32	0.19	1.05	0.35	0.55	0.45	0	0.28	0.27	0	0
TRINITY_DN10478_c0_g2	455	256	-	-	-	-	-	-	0	0	0	3.39	0.9	0.46	0.26	2.07	0.29	0	0	5.7	0.37	0.2	0	0
TRINITY_DN10479_c0_g1	337	138	NCS1	-	GO:0050474((S)-norcoclaurine synthase activity);GO:0046872(metal ion binding);GO:0016706(oxidoreductase activity, acting on paired donors, with incorporation or reduction of molecular oxygen, 2-oxoglutarate as one donor, and incorporation of one atom each of oxygen into both donors);GO:0009820(alkaloid metabolic process)	[Q] Secondary metabolites biosynthesis, transport and catabolism ;[R] General function prediction only	-	-	0	0.15	0.54	0	0	0.13	0.38	1.32	0	0.05	0	0	0	0	0	0
TRINITY_DN10479_c0_g2	418	219	NCS1	-	GO:0050474((S)-norcoclaurine synthase activity);GO:0046872(metal ion binding);GO:0016706(oxidoreductase activity, acting on paired donors, with incorporation or reduction of molecular oxygen, 2-oxoglutarate as one donor, and incorporation of one atom each of oxygen into both donors);GO:0009820(alkaloid metabolic process)	[Q] Secondary metabolites biosynthesis, transport and catabolism ;[R] General function prediction only	-	-	0	0	0	0	4.35	0	2.39	0	0	0.13	0	0	0	0.45	2.93	11.12
TRINITY_DN10479_c0_g3	205	25.13	NCS1	flavonol synthase	GO:0050474((S)-norcoclaurine synthase activity);GO:0046872(metal ion binding);GO:0016706(oxidoreductase activity, acting on paired donors, with incorporation or reduction of molecular oxygen, 2-oxoglutarate as one donor, and incorporation of one atom each of oxygen into both donors);GO:0009820(alkaloid metabolic process)	[Q] Secondary metabolites biosynthesis, transport and catabolism ;[R] General function prediction only	K05278	ko00941(Flavonoid biosynthesis)	1.67	0	0	0	0	0	0	0	0	1.42	0	0	0	0	0	15.33
TRINITY_DN1047_c0_g1	208	26.77	-	-	-	-	-	-	3.14	0	0	0	1.72	0	1.59	0	4.22	0	0	0	0	0	0	0
TRINITY_DN10480_c0_g1	243	49.97	-	-	-	-	-	-	1.68	0	0	0	0	0	0	0	5.77	0	0	0	0	0	0	0
TRINITY_DN10480_c0_g2	253	57.88	-	-	-	-	-	-	0.73	0	0	0	2.39	0	0.74	0	2.19	0	0	0	3.19	0	0	0
TRINITY_DN10481_c0_g1	506	307	HSP90	heat shock protein 90kDa beta	GO:0005788(endoplasmic reticulum lumen);GO:0005524(ATP binding);GO:0051082(unfolded protein binding);GO:0006457(protein folding);GO:0006950(response to stress)	-	K09487	ko04621(NOD-like receptor signaling pathway);ko04626(Plant-pathogen interaction);ko05200(Pathways in cancer);ko05215(Prostate cancer)	6.92	0.87	0	0	2.25	0.18	0.42	0	6.45	0.87	0.06	0	1.98	0.68	0	0
TRINITY_DN10482_c0_g1	499	300	-	-	-	-	-	-	1.61	0.21	0.19	0	1.92	0.12	0.43	0	0.88	0.24	0.06	0	0.8	0.58	0	0
TRINITY_DN10483_c0_g1	772	541.31	-	-	-	-	-	-	0.35	0.86	0.12	0.64	3.25	1.9	1.32	1.47	0.6	1.06	0	1.79	4.52	0.88	1.56	2.59
TRINITY_DN10484_c0_g1	253	57.88	-	-	-	-	-	-	0	0	0	5.99	0	0	0	0	0.65	0	0	0	3.19	0	0	0
TRINITY_DN10485_c0_g1	742	543	-	-	-	-	-	-	0.5	0.27	0.55	1.98	0.34	0.21	0.31	5.4	0.83	0	0	2.52	0.54	0.03	0.53	0
TRINITY_DN10486_c0_g1	386	187	-	-	-	[R] General function prediction only	-	-	0.11	0.44	0.4	0	0.62	0	0.23	2.73	0.3	0.38	0.1	0	0.79	0.09	0.09	0
TRINITY_DN10487_c0_g1	674	475	-	-	-	-	-	-	0	0	0	0	1.41	0.23	0.27	0	2.33	0	0	0	2.41	0.23	0	0
TRINITY_DN10487_c0_g2	796	597	ADK1	adenosine kinase	GO:0048046(apoplast);GO:0009507(chloroplast);GO:0005829(cytosol);GO:0005886(plasma membrane);GO:0009506(plasmodesma);GO:0004001(adenosine kinase activity);GO:0005524(ATP binding);GO:0005507(copper ion binding);GO:0016773(phosphotransferase activity, alcohol group as acceptor);GO:0006169(adenosine salvage);GO:0044419(interspecies interaction between organisms);GO:0046686(response to cadmium ion);G…	[G] Carbohydrate transport and metabolism	K00856	ko00230(Purine metabolism)	3.1	0.07	0.12	0	2.7	0	0	0	0.55	0.57	0.12	0	0	0.14	0.09	0
TRINITY_DN10488_c0_g1	377	178	-	-	-	-	-	-	1.06	1.74	0.73	0	3.49	0.94	0.24	0.64	1.38	0.5	0.72	0	3.11	0.49	0.19	0
TRINITY_DN10489_c0_g1	272	74.24	-	-	-	-	-	-	0.57	0.28	1.75	0	3.41	0	0	2.29	0.51	1.68	0.25	0	0	0	0.46	26.93
TRINITY_DN1048_c0_g1	266	68.9	-	-	-	-	-	-	1.83	0.6	1.08	0	1.67	1.62	0	0	7.11	0	0	0	0.54	0.25	0	0
TRINITY_DN10490_c0_g1	428	229	-	-	-	-	-	-	0	0	0	0	0	0	0	0	0.44	0	0.24	0	0	0.61	0.07	0
TRINITY_DN10490_c0_g2	625	426	-	-	-	-	-	-	0.79	0.1	0.26	0	0.81	0.7	0.1	0	0.34	0.25	0	2.32	1.13	0.69	0	0
TRINITY_DN10491_c0_g1	2044	1845	MPP	mitochondrial processing peptidase	GO:0005743(mitochondrial inner membrane);GO:0070469(respiratory chain);GO:0004222(metalloendopeptidase activity);GO:0008121(ubiquinol-cytochrome-c reductase activity);GO:0008270(zinc ion binding);GO:0022900(electron transport chain);GO:0006508(proteolysis)	[O] Posttranslational modification, protein turnover, chaperones	K01412	-	75.76	18.68	12.71	16.96	63.05	20.52	18.85	14.95	94.86	18.88	14.87	16.22	74	17.36	17.39	15.66
TRINITY_DN10494_c0_g1	425	226	-	-	-	-	-	-	2.05	0.09	1.4	0.84	2.55	0.99	0.19	0.84	3.67	1.89	0.65	1.39	2.37	1.54	0.6	0
TRINITY_DN10495_c0_g1	337	138	-	-	-	-	-	-	0	0	0	0	0	0.67	0	0	0.78	0.26	0	0	0	0.36	0	0
TRINITY_DN10495_c0_g2	234	43.32	-	-	-	-	-	-	0	0.48	0.86	0	0	0	0	0	0.57	0	0	0	0	0.45	1.18	0
TRINITY_DN10496_c0_g1	1020	821	-	-	-	-	-	-	0.15	1.89	2.23	0.39	0	1.86	0.5	0	0	1.4	0.43	0	0.51	2.6	0.22	9.16
TRINITY_DN10496_c0_g2	1235	1036	-	-	-	-	-	-	1.29	7.15	17.54	29.09	2.63	5.49	8.47	35.69	0.74	8.19	7.42	60.24	0.31	10.2	7.37	68.83
TRINITY_DN10497_c0_g1	312	113	-	-	-	-	-	-	0	0	0	0	0	0	0	0	0	0	0	0	1.31	1	0	0
TRINITY_DN10497_c0_g2	310	111	-	-	-	-	-	-	0	0.98	0	1.76	0	0	0	0	0	0.64	0.66	1.01	0	0	0	0
TRINITY_DN10497_c0_g3	311	112	-	-	-	-	-	-	2.44	1.61	1.49	5.22	4.32	4.31	3.04	4.9	1.85	0	0	0	2.96	1.01	1.22	0
TRINITY_DN10498_c0_g1	1180	981	At2g38010	-	GO:0005576(extracellular region);GO:0009506(plasmodesma);GO:0017040(ceramidase activity);GO:0006665(sphingolipid metabolic process)	[T] Signal transduction mechanisms	-	-	1.52	1.44	0.57	0	1.07	1.97	0.69	2.5	3.2	2.14	0.6	2.14	0.83	1.64	0.98	0
TRINITY_DN10498_c0_g2	1110	911	At2g38010	-	GO:0005576(extracellular region);GO:0009506(plasmodesma);GO:0017040(ceramidase activity);GO:0006665(sphingolipid metabolic process)	[T] Signal transduction mechanisms	-	-	2.36	0.18	0	0.75	2.42	0.82	0.25	0	0.4	0	0.27	0	1.07	0	0	4.94
TRINITY_DN10498_c0_g3	1348	1149	At2g38010	-	GO:0005576(extracellular region);GO:0009506(plasmodesma);GO:0017040(ceramidase activity);GO:0006665(sphingolipid metabolic process)	[T] Signal transduction mechanisms	-	-	7.53	3.9	3.42	3.66	5.82	4.49	3.54	5.74	8.92	3.63	4.43	1.55	3.95	2.33	4.7	0
TRINITY_DN10499_c0_g1	2009	1810	PLT4	-	GO:0016021(integral to membrane);GO:0022891(substrate-specific transmembrane transporter activity);GO:0015293(symporter activity);GO:0008643(carbohydrate transport)	[R] General function prediction only	-	-	0.29	0.23	0.39	4.68	0.23	0.06	0.12	3.78	0.16	0.04	0.12	6	0.14	0.04	0.53	5.01
TRINITY_DN1049_c0_g1	239	46.96	-	-	-	-	-	-	1.34	0	0	0	20.1	1.19	0.91	0	0	0.38	0	0	0	1.85	0.73	0
TRINITY_DN104_c0_g1	248	53.86	-	-	-	-	-	-	2.34	0	0	0	8.98	0	1.58	0	2.8	0	0	7.08	1.11	0	0	0
TRINITY_DN104_c0_g2	238	46.22	-	-	-	-	-	-	0	0.45	2.81	0	0	0	0	0	0	0	0	0	0.7	0.38	0	0
TRINITY_DN10500_c0_g1	536	337	-	-	-	-	-	-	1	0.06	0	0	0.2	0.22	0	0	0.56	0.16	0.22	0	1.53	0.1	0.15	0
TRINITY_DN10501_c0_g1	272	74.24	VALRS	valyl-tRNA synthetase	GO:0009507(chloroplast);GO:0005829(cytosol);GO:0005739(mitochondrion);GO:0005524(ATP binding);GO:0004832(valine-tRNA ligase activity);GO:0009793(embryo development ending in seed dormancy);GO:0006438(valyl-tRNA aminoacylation)	[J] Translation, ribosomal structure and biogenesis	K01873	ko00290(Valine, leucine and isoleucine biosynthesis);ko00970(Aminoacyl-tRNA biosynthesis)	1.98	0	0	3.27	0	0.5	0	1.02	0.76	0	0.25	0	2.98	0.94	0.92	0
TRINITY_DN10502_c0_g1	452	253	-	protoheme IX farnesyltransferase	-	[H] Coenzyme transport and metabolism	K02257	ko00190(Oxidative phosphorylation);ko00860(Porphyrin and chlorophyll metabolism)	0	0	0.15	0	0	0.1	0	0	0.71	0	0	0	0	0.47	0	0
TRINITY_DN10502_c0_g2	253	57.88	-	-	-	-	-	-	0	0	1.59	0	0	0.54	1.37	0	1.18	1.14	0	0	1.91	0.65	0	0
TRINITY_DN10502_c0_g3	451	252	-	protoheme IX farnesyltransferase	-	[H] Coenzyme transport and metabolism	K02257	ko00190(Oxidative phosphorylation);ko00860(Porphyrin and chlorophyll metabolism)	0.58	0.25	0	0	0	0	0.11	2.25	0.36	0.09	0.07	0	0	0	0.54	0
TRINITY_DN10503_c0_g1	234	43.32	-	-	-	-	-	-	1.46	0	0	7.6	0	0	0	0	2.61	0	0	20.72	2.13	0	0	0
TRINITY_DN10504_c0_g1	674	475	-	-	-	-	-	-	1.11	1.3	0.55	0.29	0.68	0.51	0.36	3.19	0.67	0.9	0.12	3.45	1.71	0.66	0.43	0
TRINITY_DN10505_c0_g1	655	456	-	-	-	-	-	-	1.2	0.45	0.37	0.53	0.71	0.41	0.33	1.25	0.95	0.27	0.08	0	1.13	0.5	0.52	0
TRINITY_DN10505_c1_g1	309	110	-	-	-	-	-	-	0.19	0.56	0	5.04	0	0	0	1.38	0	0.32	0	0	0	0	0.77	0
TRINITY_DN10506_c0_g1	232	41.9	-	-	-	[R] General function prediction only	-	-	2.51	0.98	0	0	0	0	0	5.87	4.95	0.43	0	0	0	0.83	0.41	0
TRINITY_DN10507_c0_g1	231	41.21	-	-	-	-	-	-	4.59	1	0	0	1.12	1.8	2.58	3.22	2.29	2.16	0	0	4.47	0.84	0.83	0
TRINITY_DN10508_c0_g1	1036	837	rpoC2	DNA-directed RNA polymerase subunit beta'	GO:0009507(chloroplast);GO:0003677(DNA binding);GO:0003899(DNA-directed RNA polymerase activity)	-	K03046	ko00230(Purine metabolism);ko00240(Pyrimidine metabolism);ko03020(RNA polymerase)	0.38	0.3	0.13	1.95	0.88	0.53	0.18	1.85	0.61	0.45	0.28	1.55	0.62	0.31	0.16	1.01
TRINITY_DN10508_c1_g1	420	221	rpoC2	DNA-directed RNA polymerase subunit beta'	GO:0009507(chloroplast);GO:0003677(DNA binding);GO:0003899(DNA-directed RNA polymerase activity)	-	K03046	ko00230(Purine metabolism);ko00240(Pyrimidine metabolism);ko03020(RNA polymerase)	0.76	0	0.5	2.9	0.1	0.17	0.19	1.88	0.85	0.32	0.17	0	0.67	0.08	0	0
TRINITY_DN10509_c0_g1	201	23.03	-	-	-	-	-	-	0	0	0	24.05	0	0.81	0	1.64	0	0	3.18	0	0	0	2.96	0
TRINITY_DN10509_c0_g2	446	247	-	-	-	-	-	-	1.11	0.67	0.38	0.63	0.75	0.6	0.43	0.77	1.98	0.43	0.44	0	1.72	0.21	0.9	0
TRINITY_DN1050_c0_g1	312	113	-	-	-	[B] Chromatin structure and dynamics ;[D] Cell cycle control, cell division, chromosome partitioning	-	-	1.3	0.18	0.82	6.9	3.26	1.97	1.88	0.67	3	0.47	0.65	0	0.49	0.46	0.9	0
TRINITY_DN10510_c0_g1	278	79.74	At1g18390	-	GO:0005886(plasma membrane);GO:0005524(ATP binding);GO:0004674(protein serine/threonine kinase activity)	[T] Signal transduction mechanisms	-	-	1.58	0	0	0	0	0.47	0	0	1.42	0	0.92	0	0	0	0.64	0
TRINITY_DN10511_c0_g1	226	37.8	CODM	-	GO:0046872(metal ion binding);GO:0008168(methyltransferase activity);GO:0016706(oxidoreductase activity, acting on paired donors, with incorporation or reduction of molecular oxygen, 2-oxoglutarate as one donor, and incorporation of one atom each of oxygen into both donors);GO:0016702(oxidoreductase activity, acting on single donors with incorporation of molecular oxygen, incorporation of two ato…	[Q] Secondary metabolites biosynthesis, transport and catabolism ;[R] General function prediction only	-	-	14.18	2.62	6.91	0	75.02	21.34	6.95	0	15.19	7.75	0	0	7.89	14.21	14.2	0
TRINITY_DN10511_c0_g2	415	216	-	-	-	[Q] Secondary metabolites biosynthesis, transport and catabolism ;[R] General function prediction only	-	-	0.63	0.69	0.68	0	2.22	0.22	0.66	0	3.71	0.21	0.34	0	1.86	0.33	0.51	0
TRINITY_DN10512_c0_g1	575	376	-	-	-	-	-	-	1.12	0.11	0	0	2.02	0.59	0.23	0.6	1.1	1.09	0.19	0	1.32	0.42	0.18	0
TRINITY_DN10513_c0_g1	767	568	TCP8	-	GO:0005634(nucleus);GO:0001047(core promoter binding);GO:0006355(regulation of transcription, DNA-dependent);GO:0006351(transcription, DNA-dependent)	-	-	-	4.25	0	0	0	0	0	0	0.74	5.76	1.34	0.15	1.72	1.65	0	0	7.02
TRINITY_DN10514_c0_g1	887	655.24	-	-	-	-	-	-	1.95	0.61	0.93	2.65	0.4	0.49	0.68	2.04	1.34	0.53	0.57	0.91	1.1	0.57	0.5	4.33
TRINITY_DN10515_c0_g1	570	371	-	-	-	-	-	-	1.36	1.06	2.05	2.15	1.55	0.85	0.97	3.72	1.02	0.86	0.89	0	1.04	1.17	0.92	0
TRINITY_DN10516_c0_g1	230	40.51	-	-	-	-	-	-	2.08	0	0	0	0.57	0	0	0	1.4	1.32	0	0	3.64	0	0	0
TRINITY_DN10518_c0_g1	302	103	-	-	-	-	-	-	0	0	0	3.03	0	0	0.14	0	3.77	0	0.36	0	0.7	0	0	0
TRINITY_DN10519_c0_g1	415	216	PCMP-E65	-	-	[R] General function prediction only	-	-	1.27	0.1	0.52	0.16	0	0.17	0.2	3.94	0.52	0.33	0.25	0	0	1.13	0.63	0
TRINITY_DN1051_c0_g1	341	142	-	-	-	-	-	-	0	1.6	1.18	0	0	6.44	0.75	20.66	0	0	0.13	0	2.86	3.32	3.6	0
TRINITY_DN10520_c0_g1	264	67.15	-	-	-	-	-	-	2.19	0	0.55	0	2.74	1.11	0	4.51	0	0	0.54	0	0	2.59	1.27	0
TRINITY_DN10521_c2_g1	1078	879	GLXI	lactoylglutathione lyase	GO:0004462(lactoylglutathione lyase activity);GO:0046872(metal ion binding)	[G] Carbohydrate transport and metabolism	K01759	ko00620(Pyruvate metabolism);ko04011(MAPK signaling pathway - yeast)	176.86	39.17	40.45	21.14	149.63	49.76	35.86	22.8	136.01	55.71	22.82	24.07	117.21	42.44	26.33	10.35
TRINITY_DN10521_c2_g2	349	150	GLXI	lactoylglutathione lyase	GO:0004462(lactoylglutathione lyase activity);GO:0046872(metal ion binding)	[G] Carbohydrate transport and metabolism	K01759	ko00620(Pyruvate metabolism);ko04011(MAPK signaling pathway - yeast)	22.96	1.35	5.54	9.49	64.45	3.67	2.86	9.75	82.05	4.6	2.22	0	66.63	4.57	1.22	3.9
TRINITY_DN10522_c0_g1	1195	880.89	VHA-D	V-type H+-transporting ATPase subunit D	GO:0000325(plant-type vacuole);GO:0005886(plasma membrane);GO:0033178(proton-transporting two-sector ATPase complex, catalytic domain);GO:0005774(vacuolar membrane);GO:0046961(proton-transporting ATPase activity, rotational mechanism);GO:0015991(ATP hydrolysis coupled proton transport)	[C] Energy production and conversion	K02149	ko00190(Oxidative phosphorylation);ko04145(Phagosome);ko04966(Collecting duct acid secretion);ko05110(Vibrio cholerae infection);ko05120(Epithelial cell signaling in Helicobacter pylori infection)	143.53	33.12	57.45	57.97	102.17	30.13	51.01	34.77	139.69	33.41	30.38	54.78	111.65	35.13	37.21	77.74
TRINITY_DN10523_c0_g1	621	422	-	-	-	-	-	-	117.8	22.53	23.89	19.37	131.97	27.62	40.94	28.75	143.73	35.71	22.41	5.74	115.3	32.79	31.75	26.39
TRINITY_DN10524_c0_g1	253	57.88	-	-	-	-	-	-	58.53	2.37	1.37	0	190.93	3.59	3.38	4.25	129.02	0.95	0	0	77.1	7.22	1.75	0
TRINITY_DN10524_c0_g2	295	96.03	-	-	-	-	-	-	20.96	0.93	1.69	0	30.56	1.9	1.07	0	64.14	1.47	0.76	0	20.36	0	0.72	0
TRINITY_DN10525_c0_g1	487	288	pabpc1B	-	GO:0005737(cytoplasm);GO:0005634(nucleus);GO:0000166(nucleotide binding);GO:0008143(poly(A) RNA binding);GO:0006378(mRNA polyadenylation)	-	-	-	3.4	1.22	0.54	0	2.3	0.86	0	0	6.61	0.44	0	0	0	0.59	0	0
TRINITY_DN10525_c0_g2	496	297	-	-	-	-	-	-	2.48	0	0.36	0	4.94	0.43	0.65	0	0.57	0.83	1.46	0	2.63	0.55	0.79	0
TRINITY_DN10527_c0_g1	1719	1520	-	-	-	-	-	-	0.46	1.15	0.32	1.3	1.08	0.92	0.14	0.47	0.66	0.56	0.37	0	1.2	0.74	0.15	1.66
TRINITY_DN10528_c0_g1	371	172	-	-	-	-	-	-	0	0	0	2.72	1.2	0	0	1.76	0.66	0.1	0	0	0.86	0	0	0
TRINITY_DN10529_c0_g1	259	62.86	-	-	-	-	-	-	0.75	0.79	0	0	0	0.3	0.34	3.89	1.09	0	0.78	5.29	2.93	3.44	0.57	0.81
TRINITY_DN10529_c0_g2	259	62.86	-	-	-	[R] General function prediction only	-	-	1.34	0	0	0	2.74	0	0	0	4.26	1.21	0.29	0	0.59	0	0.54	0
TRINITY_DN10529_c0_g3	267	69.78	-	-	-	-	-	-	2.03	1.06	0.53	0	7.1	0	0	4.64	5.17	3.25	0.34	10.67	0	1.39	1.19	25.22
TRINITY_DN1052_c0_g1	283	84.42	-	3-dehydroquinate synthase	-	-	K01735	ko00400(Phenylalanine, tyrosine and tryptophan biosynthesis)	0	0	0	6.98	0	0.22	0	0	0.89	0.21	0	0	0	0	0	0
TRINITY_DN1052_c0_g2	360	161	-	-	-	-	-	-	0.26	0.13	0.23	0	0.43	0	0	0	1.17	0	0	0	1.26	0.65	0.21	0
TRINITY_DN10531_c0_g1	941	742	-	-	-	-	-	-	0.74	0.22	0.15	0	0.87	0.33	0.29	0.2	0.56	0.17	0.12	0	0.57	1.45	0.3	3.38
TRINITY_DN10531_c1_g1	1044	845	-	-	-	-	-	-	0.45	0.39	0.13	0.66	0.68	0.2	0.53	0.13	0.33	0.08	0.17	0	1.53	0.95	0.1	0
TRINITY_DN10532_c0_g1	2832	2633	-	-	-	[R] General function prediction only	-	-	9.06	2.84	1.48	3.68	6.94	2.96	3.56	2.46	8.55	2.5	1.84	2.96	7.25	3.56	3.38	1.74
TRINITY_DN10533_c0_g1	394	195	VTI13	vesicle transport through interaction with t-SNAREs 1	GO:0016021(integral to membrane);GO:0006886(intracellular protein transport);GO:0016192(vesicle-mediated transport)	[U] Intracellular trafficking, secretion, and vesicular transport	K08493	ko04130(SNARE interactions in vesicular transport)	1.72	1.16	0.76	0.71	0.24	0.95	0.11	0	2.32	1	1.5	0	0.09	0.62	0.52	0
TRINITY_DN10534_c0_g1	307	108	-	-	-	-	-	-	0	0	0.35	5.61	1.9	0	0	0.36	0	0	0	16.01	0	0	0	0
TRINITY_DN10534_c0_g2	386	132.57	-	-	-	-	-	-	0.83	0	3.31	0	8.09	1.07	6.95	0	0	2.99	2.37	22.67	5.73	0	0	15.33
TRINITY_DN10535_c0_g1	351	152	-	-	-	-	-	-	0	0	0.24	0	0.83	0.98	0	0	0.37	0.23	0	0	0.49	0.46	0	0
TRINITY_DN10535_c0_g2	211	28.47	-	-	-	-	-	-	3.69	0	0	17.03	4.47	0	0	1.99	0.66	0	0	0	0	0	0	0
TRINITY_DN10536_c0_g1	484	273.18	DJ1B	4-methyl-5(b-hydroxyethyl)-thiazole monophosphate biosynthesis	-	[R] General function prediction only ;[V] Defense mechanisms	K03152	-	0.85	0.08	0.14	0	0.16	0.13	0.45	2.13	0.58	0.13	0.07	3.15	1.2	0	0.31	4.42
TRINITY_DN10537_c0_g1	732	533	-	-	-	-	-	-	19.97	3.31	9.9	8.84	22.9	2.54	3.45	11.12	31.17	4.41	3.25	18.59	22.63	2.52	4.74	28.26
TRINITY_DN10537_c0_g2	977	778	-	-	-	-	-	-	25.87	6.56	7.7	22.42	18.28	9.32	12.38	36.28	16.42	7.3	1.72	2.2	12.39	5.63	8.61	17.05
TRINITY_DN10538_c0_g1	465	266	-	-	-	-	-	-	1.72	0	0	0	0	0	0.16	0	1.36	0.33	0	0	0	0.45	0.22	0
TRINITY_DN10538_c0_g2	330	131	-	-	-	-	-	-	1.19	0.16	0	0	1.41	0	0.16	0	0.56	0	0.42	0	0	0	0.5	0
TRINITY_DN10538_c0_g3	327	128	-	-	-	-	-	-	0.62	0	1.16	0	0	0.29	0	0	0.58	0.57	0.86	0	0.86	0.02	0.51	0
TRINITY_DN10539_c0_g1	1742	1543	-	-	-	-	-	-	2.42	0.11	0.02	0.58	2.24	0.2	0.22	0.55	1.42	0.38	0.14	0.26	0.44	0.39	0.09	1.43
TRINITY_DN1053_c0_g1	226	37.8	-	-	-	-	-	-	0	2.73	0	0	0	0.98	2.25	6.01	0	0.47	0	0	0	0.92	0	0
TRINITY_DN10540_c0_g1	205	25.13	-	-	-	-	-	-	2.51	0	1.48	0	2.75	4.44	0.85	0	5.67	2.76	0	0	2.93	3.46	0.68	0
TRINITY_DN10542_c0_g1	364	165	-	-	-	-	-	-	0	1.22	1.14	0	2.04	4.07	1.6	0	0.23	3.68	1.2	0	2.29	2.84	1.71	0
TRINITY_DN10542_c0_g2	351	152	-	-	-	-	-	-	0	1.14	0	0	0	0	1.2	0.37	0	0.82	1.36	0	0	0	0.39	0.83
TRINITY_DN10542_c0_g3	364	165	-	-	-	-	-	-	0	0.48	0.33	0	1.31	1.13	0	0	0	0	0	0	0	1.31	0	0
TRINITY_DN10543_c0_g1	1079	871.87	LBD33	carbamoyl-phosphate synthase large subunit	-	-	K01955	ko00240(Pyrimidine metabolism);ko00250(Alanine, aspartate and glutamate metabolism)	5.4	4.88	2.52	0	14.19	6.45	1.82	0	4.97	5.99	5.43	0	23.24	6.16	2.34	0
TRINITY_DN10544_c0_g1	234	43.32	-	-	-	-	-	-	0	0	1.71	0	0	1.29	0	0	0	1.23	0	0	0	0.8	0	0
TRINITY_DN10544_c1_g1	207	26.22	-	-	-	-	-	-	0	0	2.83	0	7.9	0	2.43	0	0	0	0	37.65	0.7	0.66	0	0
TRINITY_DN10545_c0_g1	1924	1725	DRB2	-	GO:0005737(cytoplasm);GO:0003725(double-stranded RNA binding);GO:0005515(protein binding);GO:0031047(gene silencing by RNA)	-	-	-	28.22	8.11	4	7.79	41.2	9.76	5.82	6.33	45.75	8.5	5.52	2.15	20.37	10.79	6.8	3.59
TRINITY_DN10546_c0_g1	3679	3480	-	-	-	-	-	-	0.97	0.63	0.56	0.26	0.74	0.63	1.2	0.39	1.08	0.46	0.99	0.13	0.69	0.85	1.19	0.67
TRINITY_DN10546_c0_g2	513	314	-	-	-	-	-	-	0	0	0	0	0.03	0.05	0	0	0.15	0	0.03	0	0.6	0.03	0	0
TRINITY_DN10547_c0_g1	242	49.21	-	-	-	-	-	-	2.99	2.1	0.75	0	0.47	0	0.43	8.08	1.53	0	0.37	0	0	0	0.35	13.69
TRINITY_DN10548_c0_g1	391	192	YSL11	-	GO:0016021(integral to membrane);GO:0055085(transmembrane transport)	-	-	-	0	0	0.68	0	0	0.39	1.22	0	0	0.37	0.38	0	0.19	0	0.35	0
TRINITY_DN10548_c1_g1	283	84.42	YSL7	-	GO:0016021(integral to membrane);GO:0005886(plasma membrane);GO:0055085(transmembrane transport)	-	-	-	0	0	1.32	0	0	0.66	4.03	0	0.89	0	1.73	0	0	0	0.2	0
TRINITY_DN10548_c2_g1	212	29.05	YSL7	-	GO:0016021(integral to membrane);GO:0005886(plasma membrane);GO:0055085(transmembrane transport)	-	-	-	1.45	0	0.64	0	0	0.64	2.93	0	0	0	1.26	0	0	0	1.17	0
TRINITY_DN10549_c0_g1	248	53.86	-	-	-	-	-	-	0	0	0	0	4.17	0	0	0	0.35	0	0	0	0	0	0	0
TRINITY_DN10549_c0_g2	248	53.86	-	-	-	-	-	-	1.17	0	0	0	6.95	0	0	0	2.8	0.33	0	0	0	0	0	0
TRINITY_DN1054_c0_g1	210	27.9	-	-	-	-	-	-	1.51	1.48	0	0	1.65	0	0	0	2.03	1.28	0.66	0	9.91	0	0	0
TRINITY_DN10550_c0_g1	322	123	-	-	-	-	-	-	0.34	0	0.6	1.13	0.75	0	0	4	0	0	0.3	0	0	0	0.28	0
TRINITY_DN10551_c0_g1	539	340	-	-	-	-	-	-	1.85	1.21	0.71	1.99	3.72	0.66	0.5	2.23	2.77	0.84	0.05	4.62	2.6	0.77	0.4	0
TRINITY_DN10552_c0_g1	287	88.24	-	-	-	-	-	-	0	0	0	0	0	0	0	0	0	0	0	0	0	0	0	0.24
TRINITY_DN10552_c0_g2	373	174	-	-	-	-	-	-	0	0.12	0.75	3.19	0.13	0.43	0.49	0	0.43	0.1	0	0	0	0.5	0.1	0
TRINITY_DN10553_c0_g1	237	45.49	-	-	-	-	-	-	0	2.27	0	5.33	0	0	0	7.07	0	0	0	0	0	0.77	0	0
TRINITY_DN10554_c0_g1	1366	1167	PUP3	-	GO:0016021(integral to membrane);GO:0005345(purine base transmembrane transporter activity)	-	-	-	0.07	0.04	0.65	23.5	0	0.16	0.4	26.28	0.23	0.21	0.19	12.71	0	0	1.09	42.08
TRINITY_DN10555_c0_g1	767	568	-	-	-	-	-	-	0.26	0.15	0.46	0.73	0.12	0	0.34	1.27	0.56	0.28	0.84	1.38	0.32	0.06	0.84	0
TRINITY_DN10556_c0_g1	568	369	-	Ras-related protein Rab-7A	-	[R] General function prediction only	K07897	ko04144(Endocytosis);ko04145(Phagosome)	0.57	0.45	1.46	0	1.37	0.5	0.35	0	0.51	1.01	0.2	0	0.35	0.52	0.42	0
TRINITY_DN10557_c0_g1	288	89.2	-	-	-	-	-	-	0	0	0	0.58	0	0	0.24	7.64	0	0	0	10.82	0	0	0.38	0
TRINITY_DN10558_c0_g1	251	56.26	-	-	-	-	-	-	0	0.97	0	0	0	0.66	0	0	0.34	0	0.69	0	0	1.24	0.61	0
TRINITY_DN10558_c0_g2	310	111	Pol	-	GO:0004519(endonuclease activity);GO:0003723(RNA binding);GO:0003964(RNA-directed DNA polymerase activity);GO:0006278(RNA-dependent DNA replication)	[R] General function prediction only	-	-	0.57	0.25	0	0	0	0	0	0	0	0.96	1.13	0	0	0	0	0
TRINITY_DN10558_c1_g1	290	91.14	AtMg01250	-	GO:0005739(mitochondrion);GO:0003723(RNA binding);GO:0003964(RNA-directed DNA polymerase activity);GO:0006278(RNA-dependent DNA replication)	[R] General function prediction only	-	-	0.46	0.45	0.41	0	0.25	0.61	0	0	0.83	1.17	0.4	0	0.4	0.19	0	0
TRINITY_DN1055_c0_g1	289	90.17	-	-	-	-	-	-	0	0	0	7.68	0	0	0	1.05	0	0	0	0	0.41	0	0	0
TRINITY_DN1055_c1_g1	322	123	-	-	-	-	K07130	-	2.91	0.34	0.15	0	2.57	0.3	0.17	2.46	11.02	0.72	0	3.28	2.52	0	0.28	0
TRINITY_DN10560_c0_g1	462	263	-	-	-	-	-	-	0.8	0	0.42	1.58	0	0.14	0.24	0	0	0.14	0	4.1	0.98	0	0.39	0
TRINITY_DN10561_c0_g1	207	26.22	-	-	-	-	-	-	2.4	0.79	0	0	0	2.13	0.81	0	0.72	0.68	0.7	0	0	1.99	0.65	0
TRINITY_DN10562_c0_g1	2092	1886.47	-	-	-	[G] Carbohydrate transport and metabolism	-	-	6.66	0.8	0.51	2.07	5.93	0.91	0.88	1.44	12.24	1.21	0.89	0	5.37	1.32	1.01	1.2
TRINITY_DN10563_c0_g1	507	308	-	-	-	-	-	-	0.14	0.13	0.12	1.8	1.42	0.12	0.41	1.35	0	0	0.12	0	0.36	0.06	0.33	0
TRINITY_DN10564_c0_g1	1528	1329	-	-	-	-	-	-	0.32	0.33	0.07	0.86	0.21	0.29	0.46	0.48	0.21	0.32	0.15	0	0.06	0.13	0.33	0
TRINITY_DN10565_c0_g1	495	296	-	-	-	-	-	-	0.85	0.14	0.13	1.64	1.24	0.25	0.29	0	0.76	0.06	0.12	0	0.12	0.24	0.23	0
TRINITY_DN10566_c0_g1	1154	955	-	-	-	-	-	-	35.37	5.4	17.69	21.95	23.91	5.86	12.61	15.68	47.15	7.85	7.09	16.07	17.13	7.2	8.77	8.57
TRINITY_DN10567_c0_g1	240	47.71	-	-	-	-	-	-	1.32	0	0	0	1.45	0	0	0	2.37	0	0	0	4.64	0	0	0
TRINITY_DN10568_c0_g1	444	245	-	-	-	-	-	-	0	0	0	0	0	0	0	1.7	0	0	0.05	0	0	0	0	0
TRINITY_DN10568_c0_g2	444	245	-	-	-	-	-	-	0	0.83	0	0	1.81	0	0	0	0.58	0	0.05	0	0.99	0.99	0	0
TRINITY_DN10568_c0_g3	444	245	-	-	-	-	-	-	1.89	0.35	0.15	0	1.01	0.08	0.61	0	0.19	0.29	0.05	0	0.14	0	0.35	0
TRINITY_DN10569_c0_g1	546	347	-	-	-	-	-	-	0.67	1.56	1.2	4.69	0	1.32	1.29	3.16	1.14	2.57	0	8.21	0	2.38	0.1	12.74
TRINITY_DN1056_c0_g1	416	217	ADH1	alcohol dehydrogenase	-	[Q] Secondary metabolites biosynthesis, transport and catabolism	K00001	ko00010(Glycolysis / Gluconeogenesis);ko00071(Fatty acid metabolism);ko00350(Tyrosine metabolism);ko00624(1- and 2-Methylnaphthalene degradation);ko00641(3-Chloroacrylic acid degradation);ko00830(Retinol metabolism);ko00980(Metabolism of xenobiotics by cytochrome P450);ko00982(Drug metabolism - cytochrome P450)	0.39	0.1	0.94	0.32	0.32	0.09	1.67	3.84	0.52	0.25	1.94	0	0.42	0.32	1.73	0
TRINITY_DN10570_c0_g1	595	284.2	PDI	prolyl 4-hydroxylase, beta polypeptide	GO:0005788(endoplasmic reticulum lumen);GO:0009055(electron carrier activity);GO:0003756(protein disulfide isomerase activity);GO:0015035(protein disulfide oxidoreductase activity);GO:0045454(cell redox homeostasis);GO:0006662(glycerol ether metabolic process)	-	K09580	-	2.66	2.49	0.76	0	1.83	4.39	1.59	0.72	2.9	2.86	0.89	0	3.12	1.76	1.34	0
TRINITY_DN10571_c0_g1	1234	1035	-	-	-	-	-	-	0.47	0.36	0.47	0.37	0.18	0.22	0.25	0.86	0.28	0.29	0.26	1.86	0.45	0.2	0.14	0
TRINITY_DN10571_c0_g2	485	286	-	-	-	-	-	-	0.43	0	0	0	0	0.49	0	0	0.02	0	0.01	0	0	0	0.09	0
TRINITY_DN10572_c0_g1	345	146	-	-	-	-	-	-	1.06	0	0.14	0	0.32	0.38	0	0.78	0.62	0.12	0.13	0	4.04	0.98	0.82	0
TRINITY_DN10572_c0_g2	210	27.9	-	-	-	-	-	-	0.46	0	5.24	0	0	0	0	0	5.56	0	0	0	0	0.49	0	0
TRINITY_DN10573_c0_g1	980	781	-	-	-	-	-	-	0.19	0.45	0	0.53	0	1.21	0.27	0.15	0.84	0.41	0	0	0.64	0	0.17	0
TRINITY_DN10574_c0_g1	379	180	-	-	-	-	-	-	1.05	0.34	0.31	0	0	0.52	0.24	0.74	0.21	1.39	0.71	0	0	0	0.76	0
TRINITY_DN10575_c0_g1	275	76.97	-	-	-	-	-	-	0	0	0	5.63	0	0	0	5.9	0	0	0.48	0	0	0	0	0
TRINITY_DN10576_c0_g1	305	106	-	-	-	-	-	-	0	1.17	0.35	0	0	0.7	3.61	0	0	0.67	0	0	0.87	2.79	0.64	11.12
TRINITY_DN10578_c0_g1	680	481	-	-	-	-	-	-	0.61	0.26	1.04	0.94	0	0.19	0.44	1.42	0.24	0.15	0.38	1.12	0	0.33	0.21	0
TRINITY_DN10578_c1_g1	277	78.81	-	-	-	-	-	-	2.13	0	1.18	7.91	0	0	1.62	6.73	0	0.9	0.23	0	1.4	0.88	0.43	0
TRINITY_DN10579_c0_g1	216	31.43	-	-	-	-	-	-	7.36	5.91	2.36	0	1.47	6.51	5.42	0	18.59	3.4	0	0	4.11	2.77	4.88	0
TRINITY_DN1057_c0_g1	359	160	-	-	-	-	-	-	0.66	0	0	0	0	0	0	0.71	1.18	0	0	0	0	0	0.43	0
TRINITY_DN1057_c0_g2	355	156	-	-	-	-	-	-	0	0	0	2.89	0	0	0	0	0	0.34	0	0	0	0	0	0
TRINITY_DN10580_c0_g1	350	151	-	-	-	-	-	-	0.68	0	0.49	0	0	0	0	3.43	0	0	0	0	0.22	0.12	0	0
TRINITY_DN10580_c0_g2	328	129	-	-	-	-	-	-	1.15	0.48	0	0.81	0	0	0	1.27	7.31	0.41	0	0	0.74	0	0	0
TRINITY_DN10581_c0_g1	298	99	-	-	-	-	-	-	2.76	0	0.72	0	0	0.44	0	5.55	1.47	0	0.74	61.8	0	0	1.65	0
TRINITY_DN10581_c0_g2	238	46.22	HVA22E	-	GO:0016021(integral to membrane);GO:0042538(hyperosmotic salinity response);GO:0009737(response to abscisic acid stimulus);GO:0009409(response to cold);GO:0009414(response to water deprivation)	[U] Intracellular trafficking, secretion, and vesicular transport	-	-	0	0	0	0	0	0	0	0.85	0	0	0	0.5	0	0	0	0
TRINITY_DN10581_c0_g3	298	99	-	-	-	-	-	-	0	0.42	0	11.33	1.36	0	0	10.6	0	0	0	0	0	0	0	0
TRINITY_DN10581_c0_g4	241	48.46	HVA22E	-	GO:0016021(integral to membrane);GO:0042538(hyperosmotic salinity response);GO:0009737(response to abscisic acid stimulus);GO:0009409(response to cold);GO:0009414(response to water deprivation)	[U] Intracellular trafficking, secretion, and vesicular transport	-	-	1.55	0	0	38.8	4.83	0	0.44	30.52	0	2.35	0	0	0	2.15	0	0
TRINITY_DN10581_c0_g5	241	48.46	HVA22E	-	GO:0016021(integral to membrane);GO:0042538(hyperosmotic salinity response);GO:0009737(response to abscisic acid stimulus);GO:0009409(response to cold);GO:0009414(response to water deprivation)	[U] Intracellular trafficking, secretion, and vesicular transport	-	-	1.05	4.26	7.18	0	0	1.41	0.44	16.41	3.22	0.94	3.4	125.35	0	0.72	7.88	0
TRINITY_DN10581_c0_g6	295	96.03	-	-	-	-	-	-	0	0	0.66	1.93	0.24	0	0.22	1.44	0	0.2	0	9.03	0	0	0	0.22
TRINITY_DN10582_c0_g1	247	53.07	PIP2-1	aquaporin PIP	GO:0009507(chloroplast);GO:0016021(integral to membrane);GO:0005886(plasma membrane);GO:0009506(plasmodesma);GO:0005773(vacuole);GO:0031625(ubiquitin protein ligase binding);GO:0015250(water channel activity);GO:0080170(hydrogen peroxide transmembrane transport);GO:0009737(response to abscisic acid stimulus);GO:0009414(response to water deprivation)	[G] Carbohydrate transport and metabolism	K09872	-	19.49	1.55	0.94	5.94	6.51	0	1.2	2.14	12.12	0.34	0	0	14	0.33	0.64	0.79
TRINITY_DN10583_c0_g1	1044	845	-	-	-	-	-	-	0.22	0.15	0.11	0	0.38	0.11	0.28	0.96	1.2	0.21	0.09	1.12	1.11	0.14	0.44	0
TRINITY_DN10584_c0_g1	1279	1080	-	-	-	-	-	-	1.17	0.63	0.5	0.22	0.94	0.83	0.12	0.35	1.41	0.36	0.49	0	0.38	0.82	0.25	0
TRINITY_DN10585_c0_g1	443	244	-	-	-	-	-	-	0	0	0	1.47	0	0	0	2.02	0	0	0.29	0	0	0	0	0
TRINITY_DN10585_c0_g2	264	67.15	-	-	-	-	-	-	0.31	0	0	8.32	0	0	0	0	0.56	0.8	0.32	0	0	0.26	0	0
TRINITY_DN10586_c0_g1	638	439	-	syntaxin of plants SYP7	-	-	K08506	ko04130(SNARE interactions in vesicular transport)	0.48	0.14	0.34	0.16	2.36	0.17	0.19	0.52	1.33	0.2	0.25	0	0.67	0.87	0.16	0
TRINITY_DN10587_c0_g1	551	352	-	-	-	-	-	-	0.3	0.12	0	0	0	0.05	0	2.85	0.11	0.15	0	0	0.42	0.05	0.05	0
TRINITY_DN10588_c0_g1	828	629	-	-	-	-	-	-	20.35	6.95	13.05	18.86	20.9	8.33	12.65	15.86	37.76	7.02	6.28	20.33	28.76	8.63	9.83	15.19
TRINITY_DN10589_c0_g1	208	26.77	-	-	-	-	-	-	3.93	12.33	3.47	0	0	0.69	1.59	0	0.7	9.31	7.51	0	1.38	4.55	4.45	0
TRINITY_DN1058_c0_g1	402	203	-	-	-	-	-	-	0.83	0.1	0	0	0	0.37	0	3.54	0.46	0.09	0	0	0.64	0.09	0.17	0
TRINITY_DN10590_c0_g1	328	129	-	-	-	-	-	-	0	0	0	0	0	0	0.16	3.82	0.15	0	0.28	6.09	0.57	0	0	0
TRINITY_DN10591_c0_g1	566	367	-	-	-	-	-	-	2.41	1.01	0.66	3.26	1.07	1.01	0.35	0.41	0.77	0.63	0.3	1.96	1.91	0.57	0	0
TRINITY_DN10592_c0_g1	1030	831	-	-	GO:0004190(aspartic-type endopeptidase activity);GO:0003677(DNA binding);GO:0004519(endonuclease activity);GO:0003964(RNA-directed DNA polymerase activity);GO:0008270(zinc ion binding);GO:0015074(DNA integration)	[R] General function prediction only	-	-	0.25	0.6	0.04	0.42	1.27	0.63	0.15	1.21	1.11	0.49	0.09	0	0.64	0.29	0.12	0
TRINITY_DN10593_c0_g1	358	159	RPL1	-	GO:0009507(chloroplast);GO:0015934(large ribosomal subunit);GO:0019843(rRNA binding);GO:0003735(structural constituent of ribosome);GO:0006412(translation)	-	-	-	1.49	0.13	1.17	0	1.3	0	1.34	2.31	0.83	0	0.46	0	0	0	0.21	0
TRINITY_DN10593_c0_g2	237	45.49	RPL1	-	GO:0009507(chloroplast);GO:0015934(large ribosomal subunit);GO:0019843(rRNA binding);GO:0003735(structural constituent of ribosome);GO:0006412(translation)	-	-	-	4.5	0	0.41	15.23	2.53	2.04	0	18.57	0.41	0	0	8.88	1.22	1.15	1.12	0
TRINITY_DN10594_c0_g1	202	23.55	-	-	-	-	-	-	0	0	0	10.3	0	0.32	0	0	4.05	0	0	0	0	0.45	0	0
TRINITY_DN10594_c0_g2	359	160	-	-	-	-	-	-	0.26	0.13	1.04	0	0.43	0.19	0.13	0	1.05	0	0.8	0	1.15	0.37	0	0
TRINITY_DN10595_c0_g1	1195	996	-	-	-	-	-	-	1.58	0.35	0.19	0.14	0.74	0.43	0.34	0.19	2.38	0.41	0.2	0	0.37	0.17	0.34	0
TRINITY_DN10596_c0_g1	601	262.62	-	-	-	-	-	-	2.82	1.29	0.79	0	2.92	1.41	2.37	2.83	1.05	0.75	1.65	0	2.59	1.69	1.25	0
TRINITY_DN10597_c0_g1	387	188	-	-	-	-	-	-	0.89	2.19	1.28	3.78	0.61	2.37	1.7	10.37	2.21	0.85	2.14	5.73	0.39	2.13	2.17	0
TRINITY_DN10598_c0_g1	490	291	-	-	-	-	-	-	0.47	0.64	1.06	0	3.78	0.42	0.81	0	0	0.15	0.75	0	0.55	0.29	0.78	0
TRINITY_DN10598_c0_g2	363	164	-	-	-	-	-	-	0.82	0	0.58	0	0	0.01	0.12	0	0	0.26	0	0	0.13	0.32	0.78	0
TRINITY_DN1059_c0_g1	1262	1063	TIC32	3-oxoacyl-[acyl-carrier protein] reductase	GO:0005488(binding);GO:0016491(oxidoreductase activity)	[Q] Secondary metabolites biosynthesis, transport and catabolism	K00059	ko00061(Fatty acid biosynthesis);ko01040(Biosynthesis of unsaturated fatty acids)	19.5	0.76	1.52	0	22.46	6.35	0.36	0	11.93	3.47	0.07	0	1.94	9.09	0.08	0
TRINITY_DN105_c0_g1	351	152	-	Rab family, other	-	[U] Intracellular trafficking, secretion, and vesicular transport	K07976	-	0.97	0.54	0	0	0.53	0	0	0	1.98	1.95	0	0	0.73	0	0	0
TRINITY_DN105_c0_g2	346	147	-	Rab family, other	-	-	K07976	-	0	0	0	0	2.43	0	0	0	0	0.29	0.25	0	0	2.01	0.23	0
TRINITY_DN10600_c0_g1	640	311.54	-	-	-	-	-	-	3.44	0.19	0.17	0.93	0.37	1.16	0.65	1.07	1.33	0.1	0.67	0	0.76	0.18	1.06	0
TRINITY_DN10601_c0_g1	266	68.9	-	-	-	-	-	-	2.14	2.1	1.35	0	4.01	0.81	0.31	3.3	4.38	0.78	1.06	14.98	1.34	0.51	1.24	0
TRINITY_DN10602_c0_g1	378	179	-	-	-	-	-	-	0.15	0	0	0	0	0.52	0	0	0.33	0	0	0	0.93	0.49	0.24	0
TRINITY_DN10602_c0_g2	467	268	-	-	-	-	-	-	0.84	1.15	0.07	0	1.37	0	0	0	0.48	0	0.68	0	0	0	0.22	0
TRINITY_DN10604_c0_g1	212	29.05	-	-	-	-	-	-	2.17	0	0	0	0	15.36	0	0	0	0	2.52	0	1.27	8.99	0	0
TRINITY_DN10605_c0_g1	275	76.97	-	-	-	-	-	-	0	0	0	0	0	0	0	0.25	0.49	0	0	13.99	0	0	0	0
TRINITY_DN10606_c0_g1	253	57.88	-	-	-	-	-	-	0.46	0	0	0	0	0	0.74	0	0.91	0.62	0.32	0	1.27	0	0	0
TRINITY_DN10606_c0_g2	354	155	-	-	-	-	-	-	0.24	0	0.48	0	0	0	0	1.34	0.02	0	0	0	0	1.35	0.22	0
TRINITY_DN10606_c0_g3	231	41.21	-	-	-	-	-	-	1.53	2	0	12.61	0	0	0.52	3.22	1.83	0	0	0	0	0	0	0
TRINITY_DN10606_c1_g1	253	57.88	-	-	-	-	-	-	1.09	1.07	0	0	0	0	0	0	1.95	0.92	0.63	0	3.19	0	0	0
TRINITY_DN10607_c0_g1	352	153	-	-	-	-	-	-	0.15	4.13	3.64	4.53	5.81	12.44	1.95	38.08	0.8	0.1	0.41	0	9.37	12.19	6.66	12.66
TRINITY_DN10608_c0_g1	263	66.28	-	-	-	-	-	-	0.52	1.87	0.28	0	0	0	1.93	1.34	1.14	3.49	0	0	0	2.1	0.26	0
TRINITY_DN10608_c0_g2	219	33.27	-	-	-	-	-	-	0.85	0	0	0	0	0	0	1.88	0	0	0	0	0	0	0	0
TRINITY_DN10609_c0_g1	305	106	-	-	-	-	-	-	6.54	0	0.18	0	3.04	0	0.6	0	5.87	0.34	0	0	5.91	0.49	0	0
TRINITY_DN1060_c0_g1	416	217	-	-	-	-	-	-	0.39	0.76	0.09	0	0.32	0.17	1.96	0	0.26	0	0	0	0.25	0.8	0.63	0
TRINITY_DN10610_c0_g1	380	181	-	-	-	-	-	-	1.97	0.23	0.41	0	4.32	0.21	0.71	3.24	2.29	0	0	0	2.85	0.1	0.19	0
TRINITY_DN10612_c0_g1	316	117	-	-	-	-	-	-	0	0	0	0	0	0	0	0	0	0	0	0	0	0	0	14.03
TRINITY_DN10612_c0_g2	222	35.18	-	-	-	-	-	-	0.6	0	0	0	0	0	0	0	0	0	0	16.59	0	0	0	0
TRINITY_DN10613_c0_g1	355	156	GLC1	-	GO:0043169(cation binding);GO:0042973(glucan endo-1,3-beta-D-glucosidase activity);GO:0005975(carbohydrate metabolic process);GO:0006952(defense response)	-	-	-	2.14	0.73	0	0	3.51	0.41	0	0	0.53	0	0.07	0	3.76	1.5	0	0
TRINITY_DN10613_c0_g2	342	143	GLC1	-	GO:0043169(cation binding);GO:0042973(glucan endo-1,3-beta-D-glucosidase activity);GO:0005975(carbohydrate metabolic process);GO:0006952(defense response)	-	-	-	1.67	0	0	0	0	0	0.61	0	4.95	0	0	0	4.13	0.86	0	0
TRINITY_DN10614_c0_g1	673	474	-	-	-	[R] General function prediction only	-	-	0	0	0.07	4.64	0	0	0	1.18	0.36	0	0.4	0	0	0	0	5.14
TRINITY_DN10614_c0_g2	2913	2714	AtMg01250	-	GO:0005739(mitochondrion);GO:0003723(RNA binding);GO:0003964(RNA-directed DNA polymerase activity);GO:0006278(RNA-dependent DNA replication)	[R] General function prediction only	-	-	0	0.01	0.25	1.95	0	0	0	3.39	0.57	0	0.98	0	0	0.01	0	0.71
TRINITY_DN10614_c1_g1	600	401	-	-	-	-	-	-	0	0	0.09	4.71	0	0	0	1.61	0.94	0	1.28	0	0	0	0	0
TRINITY_DN10616_c0_g1	1159	925.86	-	-	-	[G] Carbohydrate transport and metabolism	-	-	0.1	0	4.86	5.7	0	0.04	1.29	0	0.02	0	3.89	0.21	0	0.31	0.62	0
TRINITY_DN10617_c0_g1	3287	3088	At1g06270	-	-	[R] General function prediction only	K01376	-	7.92	3.65	1.67	2.21	7.44	3.27	3.92	2.37	6.9	3.63	2.8	0.42	7.34	3.31	3.24	1.91
TRINITY_DN10618_c0_g1	329	130	-	-	-	-	-	-	0	0.32	0	0	0	0	0	0	3.75	0	0	0	0	0	0	0
TRINITY_DN10618_c0_g2	329	130	-	-	-	-	-	-	0.65	0	0	0	0	0	0	0	1.04	0	0	0	0	0	0	0
TRINITY_DN10618_c0_g3	259	62.86	-	-	-	-	-	-	0	0	0	0	0	0.3	0	0	0	0	0	0	1.17	0	0	0
TRINITY_DN10619_c0_g1	423	224	-	-	-	-	-	-	0.38	0	0	1.08	0	0	0.47	0	0	0	0	0	0.66	0	0	0
TRINITY_DN10619_c0_g2	425	226	-	-	-	-	-	-	0.37	0.27	0.25	0	0	0	0	0	1	0	0	0	0	0.39	0	0
TRINITY_DN1061_c0_g1	281	82.54	-	-	-	-	-	-	2.55	1.5	0.9	0	10.73	1.35	0.33	1.38	2.08	1.35	0.66	0	4.27	2.74	0.41	0
TRINITY_DN10620_c0_g1	1381	1182	-	-	GO:0030246(carbohydrate binding);GO:0047938(glucose-6-phosphate 1-epimerase activity);GO:0005975(carbohydrate metabolic process)	[G] Carbohydrate transport and metabolism	-	-	25.05	18.12	14.33	28.15	21.1	0	18.47	0	37.71	7.1	10.63	0	27.42	0	0.14	0
TRINITY_DN10620_c0_g2	1383	1184	-	-	GO:0030246(carbohydrate binding);GO:0047938(glucose-6-phosphate 1-epimerase activity);GO:0005975(carbohydrate metabolic process)	[G] Carbohydrate transport and metabolism	-	-	27.5	2.28	15.58	0	30.99	22.32	15.07	34.66	17.94	15.28	7.93	41.28	17.68	21.67	25.76	31.75
TRINITY_DN10621_c0_g1	631	432	NTK-1	glycogen synthase kinase 3 beta	GO:0005524(ATP binding);GO:0004674(protein serine/threonine kinase activity)	[G] Carbohydrate transport and metabolism	K03083	ko04012(ErbB signaling pathway);ko04062(Chemokine signaling pathway);ko04110(Cell cycle);ko04310(Wnt signaling pathway);ko04340(Hedgehog signaling pathway);ko04360(Axon guidance);ko04510(Focal adhesion);ko04660(T cell receptor signaling pathway);ko04662(B cell receptor signaling pathway);ko04711(Circadian rhythm - fly);ko04722(Neurotrophin signaling pathway);ko04910(Insulin signaling pathway);ko0…	70.73	16.07	13.07	32.75	81.17	19.02	17.83	21.5	94.89	18.1	9.11	11.77	77.94	21.92	20.52	0
TRINITY_DN10622_c0_g1	238	46.22	-	-	-	-	-	-	0.52	0	0.66	0	0	0.8	0	0	0.55	0	0	0	0	0.38	0	0
TRINITY_DN10622_c0_g2	253	57.88	-	-	-	-	-	-	1.45	0.71	0	0	0	1.61	0	0	0.33	0.92	0	0	0	0	0	0
TRINITY_DN10622_c0_g3	361	162	-	-	-	-	-	-	0.37	0	0.27	0	0.85	0	0	0	0.54	0	0	0	0.46	0	0	0
TRINITY_DN10623_c0_g1	296	97.02	-	-	-	-	-	-	0.43	0	0	1.07	0	0.38	1.97	0	1.94	0	0.75	0	0	0.01	0.7	0
TRINITY_DN10623_c0_g2	341	142	-	-	-	-	-	-	0	0	0	0	0	0	0	0	0	0	0	0	0	0.24	0	0
TRINITY_DN10624_c0_g1	1598	1399	-	-	-	[S] Function unknown	-	-	31.03	7.76	7.74	33.11	30.1	6.44	12.77	26.79	37.08	8.52	8.75	75.8	23.31	8	15.47	34.62
TRINITY_DN10625_c0_g1	205	25.13	-	-	-	-	-	-	0	2.46	2.95	0	0	0	0.85	0	0.75	2.83	1.46	0	2.93	0.69	1.35	0
TRINITY_DN10626_c0_g1	2539	2340	Xyl2	beta-glucosidase	GO:0005578(proteinaceous extracellular matrix);GO:0046556(alpha-N-arabinofuranosidase activity);GO:0009044(xylan 1,4-beta-xylosidase activity);GO:0045493(xylan catabolic process)	-	K05349	ko00460(Cyanoamino acid metabolism);ko00500(Starch and sucrose metabolism);ko00940(Phenylpropanoid biosynthesis)	17.4	0.05	0.06	0	16.12	0.42	0.13	0	68.46	0.33	0.17	0	3.02	0.36	0.14	0
TRINITY_DN10627_c0_g1	502	303	HAK5	KUP system potassium uptake protein	GO:0016021(integral to membrane);GO:0015079(potassium ion transmembrane transporter activity)	-	K03549	-	0.42	0.41	0	0	0.3	0	0.49	0	2.92	0.71	0.3	0	0	0.4	0.62	0
TRINITY_DN10627_c1_g1	225	37.13	HAK16	KUP system potassium uptake protein	GO:0016021(integral to membrane)	-	K03549	-	0	0	0	0	0	0	0	0	3.05	0.48	0.49	0	0	1.41	0.46	0
TRINITY_DN10627_c2_g1	293	94.06	HAK21	KUP system potassium uptake protein	GO:0016021(integral to membrane)	-	K03549	-	0.45	0	0	0	0.24	0.2	0.23	5.64	1.2	0.95	0	0	0	0.56	0.91	0
TRINITY_DN10628_c0_g1	401	202	-	-	-	-	-	-	0	0	0	0	1.82	0	0	0	0	0	0	0	0.64	0	0	0
TRINITY_DN10628_c0_g2	399	200	-	-	-	-	-	-	3.68	0	0	0	0.12	0	0	0	0.85	0.18	0	0	0	0	0	0
TRINITY_DN10628_c0_g3	398	199	-	-	-	-	-	-	0	0.31	0	0	0.69	0	0.11	0	0	0	0	0	0	0	0	0
TRINITY_DN10629_c0_g1	431	232	-	-	-	-	-	-	0.73	0	0.26	0	0	0	0	0	1.96	0.05	0	0.11	0.42	0.16	0	0
TRINITY_DN10629_c0_g2	215	30.82	-	-	-	-	-	-	9.48	0.82	2.84	5.06	5.69	0	2.61	0	9.5	1.02	0.25	0.62	2	1.04	3.31	0
TRINITY_DN10629_c0_g3	431	232	-	-	-	-	-	-	0	1.14	0	0	0.93	0	0.2	0	2.14	0.05	0.12	0	0.1	0	0	0
TRINITY_DN1062_c0_g1	272	74.24	-	-	-	-	-	-	0.47	0	0	0	2.08	0	0.57	0	0	0	0	0	1.49	0	0.46	0
TRINITY_DN1062_c0_g2	327	128	-	-	-	-	-	-	3.17	0	0.15	0	0.59	0	0	0	0.59	0	0	0	0	0	0.53	0
TRINITY_DN10630_c0_g1	502	303	-	-	-	-	-	-	0.28	0.27	0	0	0	1.2	0.84	0.7	0	0.39	0	0	0.49	0.86	0.6	0
TRINITY_DN10630_c0_g2	288	89.2	-	-	-	-	-	-	0	0	0	0	0	0.09	0	1.87	0.21	0.46	0.62	0	0	0	0.07	0
TRINITY_DN10631_c0_g1	2173	1974	ROPGEF1	-	GO:0016324(apical plasma membrane);GO:0005089(Rho guanyl-nucleotide exchange factor activity);GO:0009860(pollen tube growth)	-	-	-	26.71	3.14	1.33	0.48	35.58	3.55	1.48	0.77	21.31	4.12	0.61	0.18	20.03	5.39	1.62	1.68
TRINITY_DN10632_c0_g1	219	33.27	-	-	-	-	-	-	8.84	5.58	0.56	1.04	3.46	3.91	3.2	9.67	9.06	5.89	1.1	8.09	17.18	5.23	1.02	0
TRINITY_DN10633_c0_g1	603	404	MIOX4	inositol oxygenase	GO:0005737(cytoplasm);GO:0050113(inositol oxygenase activity);GO:0005506(iron ion binding);GO:0019310(inositol catabolic process);GO:0019853(L-ascorbic acid biosynthetic process);GO:0006949(syncytium formation)	[R] General function prediction only	K00469	ko00053(Ascorbate and aldarate metabolism);ko00562(Inositol phosphate metabolism)	1.68	0	0	0	0	0	0	0	2.54	0.12	0	0	0.38	0	0	0
TRINITY_DN10633_c0_g2	1158	948.67	MIOX2	inositol oxygenase	GO:0005737(cytoplasm);GO:0050113(inositol oxygenase activity);GO:0005506(iron ion binding);GO:0019310(inositol catabolic process);GO:0019853(L-ascorbic acid biosynthetic process);GO:0006949(syncytium formation)	[R] General function prediction only	K00469	ko00053(Ascorbate and aldarate metabolism);ko00562(Inositol phosphate metabolism)	2.05	0.04	0.04	0	2.12	0	0	0	2.63	0.08	0	0	0.29	0.04	0.04	0
TRINITY_DN10634_c0_g1	238	46.22	-	myb proto-oncogene protein, plant	-	[K] Transcription	K09422	-	0	4.66	14.33	67.72	0	0.5	12.13	81.49	0.04	4.4	0	43.59	0.58	2.22	7.09	248.51
TRINITY_DN10635_c0_g1	1207	1008	FRS5	-	GO:0005634(nucleus);GO:0008270(zinc ion binding)	-	-	-	2.8	3.79	2.67	4.64	1.81	4.88	2.72	4.85	3.27	3.51	2.33	1.09	2.66	4.34	3.02	0
TRINITY_DN10635_c0_g2	1338	1133.38	FRS5	-	GO:0005634(nucleus);GO:0008270(zinc ion binding)	-	-	-	0.34	0.25	0	0	0.16	0.27	0.21	0.14	1.06	0.11	0.18	0	0.85	0.29	0.39	0
TRINITY_DN10636_c0_g1	247	53.07	-	-	-	-	-	-	0	0	0	0	0	0.7	0	0	3.16	0.34	0	0	0	0	0	0
TRINITY_DN10636_c0_g2	263	66.28	-	-	-	-	-	-	1.9	0	0	0	0	0	0	0	3.16	0	0	0	0	0.79	0	0
TRINITY_DN10637_c0_g1	655	456	-	-	-	-	-	-	1.48	1.04	0.24	0	2.12	1.1	0.14	0	1.24	0.35	0.4	0	2.71	1.56	0.41	0
TRINITY_DN10638_c0_g1	663	464	-	-	-	-	-	-	1	0.13	0.16	0	0.45	0.04	0.14	0	1.99	0.58	0.08	0	0.56	0.3	0	0
TRINITY_DN10639_c0_g1	763	559.13	-	-	-	-	-	-	2.51	3.09	0.13	0.41	4.4	2.42	1.02	1.14	1.98	1.68	0.98	0	2.45	1.72	0.58	0
TRINITY_DN1063_c0_g1	291	92.11	-	pyrroline-5-carboxylate reductase	-	-	K00286	ko00330(Arginine and proline metabolism)	0	2.02	0	0	0	4.64	0	0	7.78	7.74	1.19	0	3.2	3.78	0	0
TRINITY_DN10640_c0_g1	210	27.9	-	kinetochore protein NDC80	-	-	K11547	-	1.04	0.21	0	0	3.3	0	1.16	6.78	1.63	1.13	0.06	0	0	0	2.01	0
TRINITY_DN10640_c0_g2	292	93.08	-	kinetochore protein NDC80	-	-	K11547	-	0	0	1	0	2.97	0	0.69	0	0	0	0	0	0	0.37	0.55	0
TRINITY_DN10640_c0_g3	287	88.24	-	kinetochore protein NDC80	-	-	K11547	-	3.72	0.87	0	6.67	0	3.79	0.36	0	5.04	1.05	0.81	0	1.04	2.37	0.33	0
TRINITY_DN10641_c0_g1	214	30.23	-	-	-	-	-	-	0	0	0	11.46	0	0	0	0	0	0	0	0	0	0	0	0
TRINITY_DN10641_c0_g2	286	87.28	-	-	-	-	-	-	0	0.47	0	0	0	0	0	3.04	0	0	0	0	0	0	0.59	0.24
TRINITY_DN10642_c0_g1	205	25.13	-	-	-	-	-	-	0	0	0	0	0	0	0.58	0	0	0	0	0	3.33	0	0	0
TRINITY_DN10642_c0_g2	361	162	-	-	-	-	-	-	0	0	0.26	0	0	0	0.62	0	0.32	0	0	0	1.45	0.3	0.28	0
TRINITY_DN10642_c0_g3	360	161	-	-	-	-	-	-	10.44	2.18	2.74	19.58	4	0.58	1.27	1.41	7.52	3.98	2.39	0	0.77	0.45	2.57	0
TRINITY_DN10643_c0_g1	513	314	-	-	-	-	-	-	0	0.33	1.01	2.1	0.37	0.06	0.27	4.1	0	0.28	0.41	6.65	0	0.17	1.25	24.2
TRINITY_DN10644_c0_g1	2451	2252	-	signal recognition particle subunit SRP72	-	[U] Intracellular trafficking, secretion, and vesicular transport	K03108	ko03060(Protein export)	39.59	14.44	10.29	13.34	44.17	13.68	18.44	15.33	59.63	15.63	11.87	10.19	52.39	16.49	14.33	6.79
TRINITY_DN10645_c0_g1	271	73.34	-	-	-	-	-	-	0	0	0	0	0	1.24	0.57	0	0.28	0	0	2.14	0.57	0.58	0.76	0
TRINITY_DN10645_c0_g2	268	70.66	-	-	-	-	-	-	0	0	0	6.35	0	0.56	1.28	0.46	0	3.26	1.86	0	0	0.87	1.1	0
TRINITY_DN10645_c0_g3	266	68.9	-	-	-	-	-	-	1.14	2.66	0.57	0.64	0	0	0	0	1.32	0	0	0	0	0	0	0
TRINITY_DN10645_c0_g4	216	31.43	-	-	-	-	-	-	1.51	0	0	5.18	3.07	0	0	5.35	13.89	2.16	0.47	7.14	3.92	0	0	0
TRINITY_DN10645_c0_g5	270	72.44	-	-	-	-	-	-	0	1.69	0	2.33	1.49	1.69	0.31	1.89	0	0.26	0	0	2.16	0.84	0.54	0
TRINITY_DN10645_c0_g6	219	33.27	-	-	-	-	-	-	0	0	0	17.94	4.26	0	0	3.91	0.42	0.13	0	0	15.68	7.75	0	0
TRINITY_DN10645_c0_g7	267	69.78	-	-	-	-	-	-	0	0	0.44	0.55	0	0.61	0	1.07	0	0	0.87	0	1.13	0	0	0
TRINITY_DN10645_c0_g8	269	71.55	-	-	-	-	-	-	0	2.08	4.22	6.46	0.95	6.52	8.24	5.39	0.57	0.99	0.43	0	4.12	3.83	5.92	0
TRINITY_DN10646_c0_g1	408	209	-	-	-	-	-	-	1.01	0.2	0.71	1.41	0.44	0.53	0.1	4.89	1.89	0.43	0.09	0	1.59	0.5	0.98	0
TRINITY_DN10647_c0_g1	988	789	-	-	-	-	-	-	0.93	0.05	0.21	1.41	0.93	0.38	0.49	1.58	1.03	0.56	0.28	0.06	0.54	0.95	0.67	0
TRINITY_DN10648_c0_g1	303	104	COMT1	flavonol 3-O-methyltransferase	GO:0047763(caffeate O-methyltransferase activity);GO:0046983(protein dimerization activity);GO:0009809(lignin biosynthetic process)	[R] General function prediction only	K05279	ko00944(Flavone and flavonol biosynthesis)	2.22	0.4	0.18	0	6.42	0.21	0	0	1.99	0.17	0	0	0	0.33	0.16	0
TRINITY_DN10648_c0_g2	224	36.47	COMT1	flavonol 3-O-methyltransferase	GO:0047763(caffeate O-methyltransferase activity);GO:0046983(protein dimerization activity);GO:0009809(lignin biosynthetic process)	[R] General function prediction only	K05279	ko00944(Flavone and flavonol biosynthesis)	0	0	2.24	0	0	0.93	0	0	8.28	0	0	0	8.25	0	0	0
TRINITY_DN10648_c0_g3	303	104	COMT1	flavonol 3-O-methyltransferase	GO:0047763(caffeate O-methyltransferase activity);GO:0046983(protein dimerization activity);GO:0009809(lignin biosynthetic process)	[R] General function prediction only	K05279	ko00944(Flavone and flavonol biosynthesis)	0	0.2	0.29	0	0	0	0	0	0	0	0	0	1.01	0.5	0	0
TRINITY_DN1064_c0_g1	294	95.04	-	-	-	-	-	-	0	0.65	0	0	0	0.39	0	0	1.19	0.37	0	0	1.94	0.18	0.18	0
TRINITY_DN1064_c1_g1	266	68.9	-	-	-	-	-	-	1.22	0.3	0	0	0	0.27	0.62	0	1.09	0	0.27	0	3.75	0.25	0	0
TRINITY_DN10650_c0_g1	801	602	-	-	-	[R] General function prediction only	-	-	46.23	11.44	16.07	21.92	39.7	9.91	16.22	35.88	40.86	12.75	8.78	29.86	34.73	11.77	15.92	28.57
TRINITY_DN10651_c0_g1	329	130	-	-	-	-	-	-	2.26	0.63	0	9.06	0.53	0.14	0.98	3.79	0.29	0.27	0.7	0	0	0	0.13	0
TRINITY_DN10652_c0_g1	339	140	-	-	-	-	-	-	0.3	0.15	0	10.64	0	0	0	2.97	0	0	0	0	0	0.25	0	0
TRINITY_DN10653_c0_g1	1555	1356	-	-	-	-	-	-	25.92	10.44	9.3	8.37	28.13	8.28	13.48	9.94	25.65	10.48	7.47	16.93	25.93	9.9	9.99	7.87
TRINITY_DN10654_c0_g1	258	62.02	-	-	-	-	-	-	41.34	5.68	12.92	44.21	10.76	5.33	63.77	19.52	95.73	170	1.18	77.59	155.45	150.62	74.09	60.07
TRINITY_DN10654_c0_g2	258	62.02	-	-	-	-	-	-	0	0	0	0	0	79.3	0.72	5.21	0	0	0	0	12.6	3.7	0.58	0
TRINITY_DN10655_c0_g1	818	619	-	-	-	-	-	-	0.98	0.23	0.21	1.57	0.3	0.12	0.93	1.22	0.3	0.17	0.12	0.04	0.83	0.48	0.44	0
TRINITY_DN10656_c0_g1	1904	1244.51	TIM21	NADH dehydrogenase (ubiquinone) 1 alpha subcomplex 6	-	-	K03950	ko00190(Oxidative phosphorylation);ko05010(Alzheimer's disease);ko05012(Parkinson's disease);ko05016(Huntington's disease)	19.23	4.69	10.18	20.26	20.77	6.99	6.37	33.36	33.54	6.08	5.28	32.48	21.15	6.08	6.68	35.13
TRINITY_DN10657_c0_g1	311	112	-	-	-	-	-	-	1.28	0	0	0	1.95	0	0	0.9	2.36	0.64	0.33	0.14	1.46	0.31	0.3	0
TRINITY_DN10657_c0_g2	206	25.67	-	-	-	-	-	-	0.97	0	0	0	0.48	0	0.83	3.43	0	0	0	1.12	7.28	0	0	0
TRINITY_DN10657_c1_g1	214	30.23	-	-	-	-	-	-	0.7	0	4.3	0	0	0	0.7	8.77	4.36	0	0	0	0.61	1.73	0	0
TRINITY_DN10659_c0_g1	1097	898	LOX2.1	lipoxygenase	GO:0009570(chloroplast stroma);GO:0009534(chloroplast thylakoid);GO:0005506(iron ion binding);GO:0016165(lipoxygenase activity);GO:0031408(oxylipin biosynthetic process)	-	K00454	ko00591(Linoleic acid metabolism);ko00592(alpha-Linolenic acid metabolism)	0.19	0.34	2.05	0.6	0.05	0.02	0.36	0	0.25	0.06	0.24	0	0	0	1.84	1.01
TRINITY_DN10661_c0_g1	252	57.06	-	E3 ubiquitin-protein ligase SIAH1	-	-	K04506	ko04115(p53 signaling pathway);ko04120(Ubiquitin mediated proteolysis);ko04310(Wnt signaling pathway)	4.21	0.86	1.95	0	1.59	0	0	0	3.63	1.32	0.32	0	3.66	0	0.3	0
TRINITY_DN10661_c0_g2	560	310.07	-	E3 ubiquitin-protein ligase SIAH1	-	-	K04506	ko04115(p53 signaling pathway);ko04120(Ubiquitin mediated proteolysis);ko04310(Wnt signaling pathway)	2.38	0.94	0	0.67	0.54	0	0.82	0	1.67	0.47	0	0	0.33	0.78	0	0
TRINITY_DN10662_c0_g1	1618	1419	-	-	-	-	-	-	0.93	0	0.13	0.02	1.22	0	0.09	1.17	1.73	0	0.05	0	0.23	0.05	0.12	0
TRINITY_DN10663_c0_g1	332	133	-	-	-	-	-	-	1.11	0.31	0	0	2.77	0.56	0.24	0	0.65	1.74	0	0	0.55	0.26	0	0
TRINITY_DN10663_c0_g2	332	133	-	-	-	-	-	-	0	0.31	0	0	0	0	0.24	0	3.04	0	0.28	0	0	0	0	0
TRINITY_DN10664_c0_g1	505	306	-	-	-	-	-	-	0	0	0	0	0.23	0	0.14	5.26	0	0	0	0	0	0	0.72	25.18
TRINITY_DN10665_c0_g1	575	376	-	-	-	-	-	-	0.84	0	0	1.29	0.98	0.1	0.28	0.96	0.25	0.19	0.19	0	1.67	0.19	0.27	0
TRINITY_DN10666_c0_g1	452	253	-	DNA-directed RNA polymerase II subunit D	-	-	K03012	ko00230(Purine metabolism);ko00240(Pyrimidine metabolism);ko03020(RNA polymerase);ko05016(Huntington's disease)	0	0	0	0	0	0	0.5	0	1.04	0	0	4.97	0	0	0	0
TRINITY_DN10666_c0_g2	426	227	-	-	-	-	-	-	0.46	0	0.49	5.04	0.41	0	0	1.83	0	0	0.32	0	0.57	0.15	0	0
TRINITY_DN10666_c1_g1	405	206	-	-	-	-	-	-	0.31	0	0.54	0	0.56	0	0	0.55	0.82	0	0	0	1.43	0	0	0
TRINITY_DN10667_c0_g1	886	687	-	-	-	-	-	-	0.18	0.81	0.32	0.5	0.07	1.16	0.19	0.33	0.22	0.23	0.24	0	0.54	0.28	0.32	0
TRINITY_DN10668_c0_g1	375	176	LRX3	-	GO:0005576(extracellular region);GO:0009505(plant-type cell wall);GO:0009506(plasmodesma);GO:0005515(protein binding);GO:0007047(cellular cell wall organization)	-	-	-	0	6.11	0	0	124.57	17.54	0	10.37	0	0	0	0.36	26.31	22.16	0	3.7
TRINITY_DN10669_c0_g1	223	35.82	-	-	-	-	-	-	1.17	0	0	0	1.29	0.52	0.59	0	5.26	2.49	1.02	0	7.72	0	0.48	0
TRINITY_DN1066_c0_g1	212	29.05	CSLD2	cellulose synthase A	GO:0016760(cellulose synthase (UDP-forming) activity);GO:0007047(cellular cell wall organization);GO:0030244(cellulose biosynthetic process)	-	K10999	-	0.72	0	0	7.15	0	0	2.93	2.61	0	0	0	19.31	0	0	0	0
TRINITY_DN1066_c1_g1	381	182	CSLD2	-	GO:0030173(integral to Golgi membrane);GO:0005886(plasma membrane);GO:0016760(cellulose synthase (UDP-forming) activity);GO:0007047(cellular cell wall organization);GO:0030244(cellulose biosynthetic process);GO:0009409(response to cold);GO:0048767(root hair elongation)	-	-	-	0.81	0	0	0	1.14	0	0	0	0.41	0	0	7.89	0.41	0	0.19	0
TRINITY_DN10670_c0_g1	1053	854	-	-	-	-	-	-	1.08	0	0.39	0.69	0.73	0.39	0.15	1.55	1.5	0.33	0.09	1.1	1.3	0.1	0.28	0
TRINITY_DN10671_c0_g1	391	192	UGT73C5	hydroquinone glucosyltransferase	GO:0016021(integral to membrane);GO:0050502(cis-zeatin O-beta-D-glucosyltransferase activity);GO:0080046(quercetin 4'-O-glucosyltransferase activity);GO:0080044(quercetin 7-O-glucosyltransferase activity);GO:0050403(trans-zeatin O-beta-D-glucosyltransferase activity);GO:0016131(brassinosteroid metabolic process)	[G] Carbohydrate transport and metabolism ;[C] Energy production and conversion	K08237	-	0	7.09	0.63	0	78.68	0.38	0	0	0	0	0.7	0	26.94	13.74	11.11	0
TRINITY_DN10671_c0_g2	455	256	UGT73C5	hydroquinone glucosyltransferase	GO:0016021(integral to membrane);GO:0050502(cis-zeatin O-beta-D-glucosyltransferase activity);GO:0080046(quercetin 4'-O-glucosyltransferase activity);GO:0080044(quercetin 7-O-glucosyltransferase activity);GO:0050403(trans-zeatin O-beta-D-glucosyltransferase activity);GO:0016131(brassinosteroid metabolic process)	[G] Carbohydrate transport and metabolism ;[C] Energy production and conversion	K08237	-	0	0	0	0	0.36	0	0	0	0	0	0	0	0	0	0	0
TRINITY_DN10673_c0_g1	696	497	-	-	-	-	-	-	206.43	111.73	624.76	137.84	284.83	126.85	635.27	235.05	141.8	154.94	155.6	140.87	344.94	88.39	298.01	263.38
TRINITY_DN10674_c0_g1	1198	995.03	ARF4	-	GO:0005634(nucleus);GO:0003677(DNA binding);GO:0046983(protein dimerization activity);GO:0010158(abaxial cell fate specification);GO:0009734(auxin mediated signaling pathway);GO:0006355(regulation of transcription, DNA-dependent);GO:0006351(transcription, DNA-dependent);GO:0010050(vegetative phase change)	-	-	-	0.86	3.01	2.84	2.98	3.13	2.85	3.95	3.87	2.08	0.48	2.71	2.93	1.96	0.77	3.72	0.02
TRINITY_DN10675_c0_g1	282	83.48	OPR1	12-oxophytodienoic acid reductase	GO:0005737(cytoplasm);GO:0016629(12-oxophytodienoate reductase activity);GO:0010181(FMN binding);GO:0031408(oxylipin biosynthetic process)	[C] Energy production and conversion ;[R] General function prediction only	K05894	ko00592(alpha-Linolenic acid metabolism)	0.5	0	0.89	14.94	0.83	0	1.02	19.28	0.45	0	1.31	23.92	0	0	1.22	17.4
TRINITY_DN10675_c0_g2	254	58.7	OPR1	12-oxophytodienoic acid reductase	GO:0005737(cytoplasm);GO:0016629(12-oxophytodienoate reductase activity);GO:0010181(FMN binding);GO:0031408(oxylipin biosynthetic process)	[C] Energy production and conversion ;[R] General function prediction only	K05894	ko00592(alpha-Linolenic acid metabolism)	20.27	2.1	6.03	3.56	22.14	5.38	1.81	19.23	14.45	2.44	1.25	16.81	19.25	4.15	2.61	0
TRINITY_DN10676_c0_g1	261	64.57	-	-	-	-	-	-	1.63	0.64	0.29	0.27	0	0	0	0.59	2.34	0.28	0.57	1.39	0	0	0	0
TRINITY_DN10676_c0_g2	261	64.57	-	-	-	-	-	-	1.95	7.35	0.58	0	0	2.88	4.28	1.76	0	1.93	1.13	0	0	6.2	1.58	0
TRINITY_DN10678_c0_g1	332	133	-	-	-	-	-	-	3.95	0.31	0	0	2.25	0	0	0	6.09	0.27	0	0	4.3	0.13	0	0
TRINITY_DN10679_c0_g1	932	733	CRF4	EREBP-like factor	GO:0005737(cytoplasm);GO:0005634(nucleus);GO:0003677(DNA binding);GO:0005515(protein binding);GO:0003700(sequence-specific DNA binding transcription factor activity);GO:0009736(cytokinin mediated signaling pathway);GO:0009873(ethylene mediated signaling pathway);GO:0048366(leaf development);GO:0042991(transcription factor import into nucleus)	-	K09286	-	2.26	0.4	0.02	0	1.7	0.18	0.06	0.18	1.41	0.52	0.05	0	1.77	0.25	0.12	0
TRINITY_DN1067_c0_g1	228	39.14	-	breast cancer 2 susceptibility protein	-	[L] Replication, recombination and repair	K08775	ko03440(Homologous recombination);ko05200(Pathways in cancer);ko05212(Pancreatic cancer)	5.37	0.53	0	0	12.94	0	0	0	22.15	0	0	0	8.48	0	0	0
TRINITY_DN10680_c0_g1	989	790	-	6-phosphogluconolactonase	-	-	K01057	ko00030(Pentose phosphate pathway)	1.94	2.77	3.57	4.21	0.12	1.76	3.18	4.43	2.2	1.26	3.82	5.34	1.42	0.7	3.77	0
TRINITY_DN10681_c0_g1	577	378	-	-	-	[M] Cell wall/membrane/envelope biogenesis	-	-	4.06	0.05	0	0	1.61	0.1	0	0	9.37	0.19	0	0	0.44	0.05	0	0
TRINITY_DN10681_c0_g2	425	226	-	-	-	[M] Cell wall/membrane/envelope biogenesis	-	-	0	0	0	0	0.16	0.16	0.38	0	0	0	0	0	0.97	0.08	0	0
TRINITY_DN10682_c0_g1	2662	2463	-	-	-	[S] Function unknown	-	-	13.65	9.15	7.08	19.58	13.47	8.69	9.05	39.14	23.68	8.43	5.57	56.49	16.68	11.33	6.57	23.15
TRINITY_DN10683_c0_g1	257	61.18	-	-	-	-	-	-	0.69	0	0.61	4.21	0	0.61	0	0	0.62	0	0	0	0	0.57	0	0
TRINITY_DN10683_c0_g2	320	121	-	-	-	-	-	-	0	0	1.38	2.89	0	0	0	0	2.65	0.39	0	0	0	0	0.24	0
TRINITY_DN10683_c0_g3	217	32.04	-	-	-	-	-	-	0	0	0	4.28	0	0	0	0	0	0.76	1.14	0	0	0	2.29	0
TRINITY_DN10684_c0_g1	440	241	-	-	-	-	-	-	1.13	0	0.62	0	0.57	0	0	3.43	2.42	0	0	0	1.22	0.29	0.14	0
TRINITY_DN10684_c0_g2	440	241	-	-	-	-	-	-	0	0	0	0	0.57	0	0	2.23	0	0	0.3	4.47	0	0	0	0
TRINITY_DN10685_c0_g1	359	160	-	-	-	[R] General function prediction only	-	-	0.92	0.26	0.12	0	0.86	0.23	0.53	0	2.12	0	0.23	0	1.84	0.54	0.11	0
TRINITY_DN10685_c0_g2	336	137	-	-	-	-	-	-	0.31	0.3	0	0	0	0.95	0.47	0	0	1.43	0.27	0	0	1.02	0.37	0
TRINITY_DN10686_c0_g1	394	195	-	elongation factor EF-1 gamma subunit	GO:0005853(eukaryotic translation elongation factor 1 complex);GO:0003746(translation elongation factor activity)	[J] Translation, ribosomal structure and biogenesis	K03233	-	0	2.09	0	0	0	2.1	0	0	0.56	2.7	0.27	0	0	1.7	0	0
TRINITY_DN10686_c0_g2	393	194	-	elongation factor EF-1 gamma subunit	GO:0005853(eukaryotic translation elongation factor 1 complex);GO:0003746(translation elongation factor activity)	[J] Translation, ribosomal structure and biogenesis	K03233	-	0	0	0	0	3.68	0	1.81	0	0.46	0	0	0	2.79	0	0.79	0
TRINITY_DN10686_c0_g3	394	195	-	elongation factor EF-1 gamma subunit	GO:0005853(eukaryotic translation elongation factor 1 complex);GO:0003746(translation elongation factor activity)	[J] Translation, ribosomal structure and biogenesis	K03233	-	25.5	4.36	3.51	0	0	0	0	0	17.17	5.02	3.72	0	0.15	0	0	0
TRINITY_DN10686_c0_g4	394	195	-	elongation factor EF-1 gamma subunit	GO:0005853(eukaryotic translation elongation factor 1 complex);GO:0003746(translation elongation factor activity)	[J] Translation, ribosomal structure and biogenesis	K03233	-	19.8	0	1.48	5.34	0	7.21	0	3.88	4.9	0	3.5	0	0.15	0	0	0
TRINITY_DN10687_c0_g1	2017	1818	At1g67340	-	GO:0005634(nucleus);GO:0008270(zinc ion binding)	-	-	-	6.21	1.35	3.07	13.01	10.33	2	1.65	28.47	4.51	1.3	1.76	34.26	2.59	1.93	4.56	28.32
TRINITY_DN10688_c0_g1	711	512	-	-	-	-	-	-	24.85	19.77	26.51	13.46	52.34	19.68	8.69	14.27	22.44	25.71	30.76	1.05	24.17	13.73	5.01	21.13
TRINITY_DN10688_c0_g2	699	500	-	-	-	-	-	-	14.57	4.01	0	0	0	0	5.82	0	12.84	1.75	0	0	15.33	0	6.2	0
TRINITY_DN10689_c0_g1	1359	1160	TCEA2	transcription elongation factor S-II	GO:0008023(transcription elongation factor complex);GO:0003677(DNA binding);GO:0005515(protein binding);GO:0003746(translation elongation factor activity);GO:0008270(zinc ion binding);GO:0032784(regulation of transcription elongation, DNA-dependent);GO:0006357(regulation of transcription from RNA polymerase II promoter);GO:0006354(transcription elongation, DNA-dependent)	[K] Transcription	K03145	-	33.14	11.19	11.06	24.38	33.46	10.75	14.97	26.4	40.15	10.26	8.7	29.7	36.22	11.5	14.32	24.15
TRINITY_DN1068_c0_g1	220	33.9	-	-	-	-	-	-	0.62	1.22	0	0	4.07	0.55	0.63	0	0	0	0	0	0	0	0	0
TRINITY_DN10690_c0_g1	271	73.34	-	-	-	-	-	-	0	0	0	0	0	0	0	6.45	0	0	0	0	0.5	0	0	0
TRINITY_DN10690_c0_g2	272	74.24	-	-	-	-	-	-	0	0	0	0	9.61	0	0	0	0	1.92	0	0	0	0.23	0	0
TRINITY_DN10691_c0_g1	791	592	-	-	-	-	-	-	1.14	0.07	0.5	0.94	0.93	0.19	0.07	1.15	1.75	0.18	0.31	0	1.31	0.21	0.12	0
TRINITY_DN10692_c0_g1	202	23.55	-	-	-	-	-	-	0	0	3.15	12.5	0	0	0	0	0	0	0	0	0	0	0	0
TRINITY_DN10692_c0_g2	202	23.55	-	-	-	-	-	-	0	0	0	0	0	0	1.81	0	0	0	0	0	0	3.7	0	0
TRINITY_DN10694_c0_g1	575	376	-	-	-	-	-	-	0.89	0.11	0.3	1.11	0	0	0.57	0	1.2	0.43	0.19	0.18	1.37	0.05	0.18	0
TRINITY_DN10695_c0_g1	1693	1494	ANT1	solute carrier family 25 (mitochondrial carrier; adenine nucleotide translocator)	GO:0016021(integral to membrane);GO:0005743(mitochondrial inner membrane);GO:0005488(binding);GO:0005215(transporter activity);GO:0055085(transmembrane transport)	[C] Energy production and conversion	K05863	ko04020(Calcium signaling pathway);ko05012(Parkinson's disease);ko05016(Huntington's disease)	226.37	65.52	50.78	77.66	225.91	61.72	67.74	53.05	342.17	79.94	55.78	56.22	234.63	57.16	47.24	55.5
TRINITY_DN10696_c0_g1	1226	945.95	At4g17560	-	GO:0009941(chloroplast envelope);GO:0009570(chloroplast stroma);GO:0016020(membrane);GO:0005840(ribosome);GO:0019843(rRNA binding);GO:0003735(structural constituent of ribosome);GO:0006412(translation)	[J] Translation, ribosomal structure and biogenesis	-	-	65.41	9.59	23.91	51.59	63.14	12.78	15.87	40.92	125.69	18.09	7.99	35.42	36.71	10.76	12.24	32.72
TRINITY_DN10697_c0_g1	384	185	-	-	-	-	-	-	4.32	0.11	0.1	0	0	0.5	0	0	2.45	0.29	0.1	0	2.69	0.75	0.83	0
TRINITY_DN10698_c0_g1	590	391	-	-	-	-	-	-	0.27	0.42	0.09	0	0.12	0	0.44	1.5	0.48	0.32	0.09	0	0.52	0	0.3	0
TRINITY_DN10699_c0_g1	461	262	-	-	-	-	-	-	0.08	0	1.42	4.5	0	0	0	0.29	0	0.41	0	0	0	0.6	0.06	0
TRINITY_DN1069_c0_g1	362	163	-	-	-	-	-	-	0	0.29	0.5	4.57	0	0	0.29	0	0	0.33	0	0	0	0.43	0	0
TRINITY_DN1069_c0_g2	228	39.14	-	-	-	-	-	-	1.61	2.48	0.78	0	1.18	2.85	0.97	0	0	1.35	0	0	5.65	0	0.43	0
TRINITY_DN106_c0_g1	296	97.02	-	-	-	-	-	-	0	0	0	2.5	0	0.77	1.53	3.9	0.19	0	0	0	0	0	0.18	0
TRINITY_DN10700_c0_g1	331	97	-	-	-	[V] Defense mechanisms	-	-	4.14	0.47	0.44	4.56	2.5	0.89	0	4.33	4.29	0.64	0.88	0	7.06	0.81	0	0
TRINITY_DN10701_c0_g1	672	473	-	-	-	-	-	-	2.31	0.31	0	1.06	0.68	0	0.09	1.4	0.8	0.26	0.23	1.52	1.17	0.07	0.11	4.63
TRINITY_DN10702_c0_g1	553	354	-	-	-	-	-	-	1.19	1.17	0.84	0.49	0.07	0.42	1.68	0.27	1.76	0.75	0.41	0	0.42	1.28	0.58	0
TRINITY_DN10703_c0_g1	556	357	-	-	-	-	-	-	0	0	0	1.16	0	0	0	0.55	0.19	0	0	0	0.11	0	0	6.96
TRINITY_DN10703_c0_g2	915	716	-	-	-	-	-	-	1.14	0.06	0	0	4.69	0.05	0.12	0.2	0.64	0.05	0.05	0.63	0.1	0	0.05	0
TRINITY_DN10703_c1_g1	389	190	-	-	-	-	-	-	0.55	0	0.59	3.1	1.1	0.2	0.56	1.39	0.4	0	0	2.6	0	0.37	0.36	0
TRINITY_DN10704_c0_g1	870	671	MAKR6	-	GO:0005886(plasma membrane);GO:0009738(abscisic acid mediated signaling pathway)	-	-	-	8.99	2.83	6.14	0	19.73	4.85	2.92	0	7.92	2.95	1.74	0	9.29	11.26	3.3	0
TRINITY_DN10705_c0_g1	495	296	-	Niemann-Pick C1 protein	-	[I] Lipid transport and metabolism	K12385	ko04142(Lysosome)	1.92	0.7	1.94	1.58	1.87	0.82	0.72	2.24	2.93	0.54	1.54	0	0.44	2.23	1.44	0
TRINITY_DN10707_c0_g1	271	73.34	AVPL1	inorganic pyrophosphatase	GO:0000139(Golgi membrane);GO:0016021(integral to membrane);GO:0005773(vacuole);GO:0009678(hydrogen-translocating pyrophosphatase activity);GO:0004427(inorganic diphosphatase activity);GO:0015992(proton transport)	-	K01507	ko00190(Oxidative phosphorylation)	0	0	0.12	0	0	0	0	0	3.43	0	0.75	0	2.7	0	0	0
TRINITY_DN10707_c0_g2	578	379	AVPL2	inorganic pyrophosphatase	GO:0000139(Golgi membrane);GO:0016021(integral to membrane);GO:0005773(vacuole);GO:0009678(hydrogen-translocating pyrophosphatase activity);GO:0004427(inorganic diphosphatase activity);GO:0015992(proton transport)	-	K01507	ko00190(Oxidative phosphorylation)	0.11	1.42	0.32	0	6.26	0	0.11	0	3.51	0.8	0	0	4	0	0.09	0
TRINITY_DN10708_c0_g1	993	794	At1g52740	histone H2A	GO:0000786(nucleosome);GO:0005634(nucleus);GO:0005773(vacuole);GO:0003677(DNA binding);GO:0005515(protein binding);GO:0042742(defense response to bacterium);GO:0016048(detection of temperature stimulus);GO:0006334(nucleosome assembly);GO:0009909(regulation of flower development)	[B] Chromatin structure and dynamics	K11251	ko05322(Systemic lupus erythematosus)	63.3	20.26	25.14	45.14	90.38	25	37.08	52.31	91.51	22.46	14.54	62.46	77.7	19.46	27.49	65.85
TRINITY_DN10709_c0_g1	454	255	-	-	-	-	-	-	10.23	3.25	0.47	0	10.82	0.47	2.58	0	29.5	3.48	0.38	0	15.41	0.35	1.1	0
TRINITY_DN10709_c0_g2	972	773	-	-	-	-	-	-	32.71	3.12	2.61	0	24.13	2.95	2.92	0	51.39	3.88	2.55	0	22.3	2.29	2.3	0
TRINITY_DN1070_c0_g1	511	312	-	-	-	-	-	-	5.12	1.59	2.38	0	5.02	2.68	2.32	2.61	4.41	2	1.64	0	2.54	1.73	1.53	0.13
TRINITY_DN10710_c0_g1	252	57.06	-	-	-	-	-	-	0.37	0	0	0	0	2.28	0	0	0	0	0	7.08	0.32	1.52	0	0
TRINITY_DN10711_c0_g1	306	107	-	-	-	-	-	-	0	0	0	0	0	0	0	8.45	0	0	0.85	0	0	0	0	0
TRINITY_DN10711_c0_g2	306	107	-	-	-	-	-	-	0.39	1.35	0	0.16	0	0.87	0	0.22	1.23	1.5	0	0	0.34	0	0.32	0
TRINITY_DN10712_c0_g1	511	285.19	-	-	-	-	-	-	1.41	0.58	1.54	0	2.29	2.52	3.55	6.03	2.24	1.03	0.94	3.09	3.07	1.9	0.87	0
TRINITY_DN10713_c0_g1	362	163	-	-	-	-	-	-	0	0	0	0	0	0	0	17.61	0	0	0	23.92	0	0	0.53	0
TRINITY_DN10715_c0_g1	326	127	-	-	-	-	-	-	0	0	0	0	0	0	0	3.28	1.19	0	0.14	0	0.29	0	0.4	0
TRINITY_DN10715_c0_g2	326	127	-	-	-	-	-	-	0.33	0	0.58	4.09	0	0	1.34	3.28	0	0	0.14	0	0	0	0	0
TRINITY_DN10716_c0_g1	288	89.2	-	-	-	-	-	-	0	0	0	38.53	0	2.47	7.87	33.53	0	0	0	13.28	0.83	1.95	3.53	45.06
TRINITY_DN10716_c0_g2	291	92.11	-	-	-	-	-	-	4.34	0.9	4.84	5.37	0.5	0.43	0	0	2.66	1.55	1.79	19.05	0	0.76	2.13	38.17
TRINITY_DN10717_c0_g1	281	82.54	-	-	-	-	-	-	0	1	0	0	0	0.23	0.52	1.15	1.14	1.08	1.33	0.82	0	0.84	0.21	0
TRINITY_DN10718_c0_g1	734	535	-	-	-	-	-	-	0.83	0.66	0.49	0	0.17	0.45	0.68	0	0.32	0.53	0.1	1.17	1.59	0.94	0.22	0
TRINITY_DN10719_c0_g1	364	165	-	-	-	-	-	-	0.25	0.63	0.11	1.89	0	0.23	0	0	0.46	0.43	0	0	0.22	0.32	0.41	0
TRINITY_DN10719_c1_g1	246	52.29	-	-	-	-	-	-	0	0	0	11.59	0	0	0	0.72	0	0	0.7	0	0	0.67	0.33	0
TRINITY_DN1071_c0_g1	207	26.22	-	-	-	-	-	-	0	0	0	0	0	0	0.81	3.61	0.72	0	0.7	17.97	0	0	0	0
TRINITY_DN10720_c0_g1	1447	1248	PAG1	20S proteasome subunit alpha 7	GO:0048046(apoplast);GO:0005829(cytosol);GO:0005634(nucleus);GO:0019773(proteasome core complex, alpha-subunit complex);GO:0005774(vacuolar membrane);GO:0004298(threonine-type endopeptidase activity);GO:0046686(response to cadmium ion);GO:0009409(response to cold);GO:0006511(ubiquitin-dependent protein catabolic process)	[O] Posttranslational modification, protein turnover, chaperones	K02727	ko03050(Proteasome)	166.17	44.84	46.37	41.17	169.64	49.24	55.54	44.55	198.77	55.01	31.38	38.75	165.51	43.47	40.07	75.61
TRINITY_DN10721_c0_g1	1403	1204	-	small subunit ribosomal protein S19	GO:0009507(chloroplast);GO:0030529(ribonucleoprotein complex);GO:0000166(nucleotide binding);GO:0003723(RNA binding);GO:0006397(mRNA processing)	[R] General function prediction only	K02965	ko03010(Ribosome)	117.74	4.8	0.88	1.09	96.96	11.3	0.11	0.09	89.19	24.46	0.38	0.02	30.9	8.02	0.11	0.07
TRINITY_DN10722_c0_g1	420	221	-	-	-	-	-	-	0.86	0.65	0.34	0	1.04	0	0.39	0.26	1.54	0.73	0.17	2.13	0	0.24	0.08	0
TRINITY_DN10723_c0_g1	253	57.88	-	-	-	-	-	-	2.54	0	0.64	0	3.18	0	0	0	0	0.92	0.32	0	1.91	0.9	0.88	0
TRINITY_DN10723_c0_g2	253	57.88	-	-	-	-	-	-	0	0.36	0	0	1.59	0	0	0	0	1.23	0	0	0	0	0	0
TRINITY_DN10724_c0_g1	372	173	-	-	-	-	-	-	0.87	0.72	0	0.3	0	0.55	0	0	0.65	0.41	0	0	3.09	0.93	0	0
TRINITY_DN10724_c0_g2	293	94.06	-	-	-	-	-	-	1.08	0	0.39	0	0	0.17	0	1.61	0	0	0	0	0	0.51	0	0
TRINITY_DN10725_c0_g1	223	35.82	-	-	-	-	-	-	4.11	1.73	3.11	0	10.93	3.63	0	0	10.52	1.49	1.02	0	3.09	5.34	1.9	0
TRINITY_DN10726_c0_g1	920	721	-	-	-	-	-	-	1.34	0.06	0.64	0.41	0.99	0.05	0	1.05	1.65	0.15	0.33	0	1.36	0.14	0.09	0.06
TRINITY_DN10727_c0_g1	999	800	UGT76C4	limonoid glucosyltransferase	GO:0016758(transferase activity, transferring hexosyl groups)	[G] Carbohydrate transport and metabolism ;[C] Energy production and conversion	K08236	-	1.48	0.22	2.41	1.07	0.76	1.93	0.54	0.76	0.92	0.73	0.38	0	0.1	0.75	0	0.05
TRINITY_DN10727_c0_g2	1630	1431	UGT76C4	limonoid glucosyltransferase	GO:0016758(transferase activity, transferring hexosyl groups)	[G] Carbohydrate transport and metabolism ;[C] Energy production and conversion	K08236	-	2.08	3.63	1.78	2.43	2.31	2.24	1.63	3.57	1.34	3.4	3.1	4.12	2.4	1.19	1.48	0
TRINITY_DN10728_c0_g1	412	213	-	-	-	-	-	-	0	1.07	0	0.98	2.38	0	0	0	0.43	0	0	0	0	0	0	0
TRINITY_DN10728_c0_g2	371	172	-	-	-	-	-	-	0.73	0	0	0	0	0.54	0.74	1.98	0.46	0.21	0	5.74	0.11	0	0.4	0
TRINITY_DN10729_c0_g1	950	751	At5g03820	-	GO:0005576(extracellular region);GO:0016298(lipase activity);GO:0016042(lipid catabolic process)	-	-	-	0.68	0.21	0.43	0	1.23	0.06	0.14	1.25	0	0.06	0.09	4.34	0.26	0.06	0	0.11
TRINITY_DN10729_c0_g2	1515	1316	At5g03820	-	GO:0005576(extracellular region);GO:0016298(lipase activity);GO:0016042(lipid catabolic process)	-	-	-	0.72	0	0	36.35	0.86	0	0.15	38.75	0.91	0.06	0	3.41	0	0.06	0.08	0
TRINITY_DN1072_c0_g1	345	146	-	-	-	-	-	-	1.15	1.02	0	0	2.52	0.25	0	0	1.79	0.37	0	0	0.13	0.6	0.58	0
TRINITY_DN1072_c0_g2	273	75.15	-	-	-	-	-	-	0	1.32	0.74	0	0	0	0	0	0.28	0	0.49	0	0	0	0	0
TRINITY_DN10730_c0_g1	287	88.24	-	-	-	-	-	-	0	0	0	0	0	0	0	0	0	0.11	0	11.19	0	0	0	0
TRINITY_DN10730_c0_g2	350	151	-	-	-	-	-	-	0.28	0	0	0	0	0.49	0.56	5.39	0	0.17	0	0	0	0.23	0.11	0
TRINITY_DN10731_c0_g1	1549	1350	-	-	-	[T] Signal transduction mechanisms	-	-	19.91	3.55	4.43	7.34	23.5	4.58	3.42	7.81	29.81	3.5	3.9	2.64	17.66	4.67	4.52	3.79
TRINITY_DN10732_c0_g1	493	294	-	-	-	-	-	-	0.57	0.21	0	0	1.17	0.25	0	0.77	0.38	0.06	0	0	1	0.53	0.17	0.14
TRINITY_DN10733_c0_g1	701	502	-	-	-	-	-	-	2.68	0	0	0.76	0.23	0.15	0.17	1.47	1.13	0.35	0.26	0.72	0.73	0.07	0.44	5.45
TRINITY_DN10734_c0_g1	462	263	-	-	-	-	-	-	0.56	0	0	1.32	0.44	0.78	0.16	0	0.79	1.35	0.28	0	0.21	0.33	0.45	0
TRINITY_DN10734_c1_g1	276	77.89	-	-	-	-	-	-	1.62	0	1.67	0	0	0.48	0	0.97	1.21	1.83	0	0	0	0.45	1.09	0
TRINITY_DN10735_c0_g1	389	190	-	-	-	-	-	-	1.77	0.22	0	0.73	1.33	0	1.12	1.59	1.29	0.47	0	3.31	0	0.37	0.36	0
TRINITY_DN10736_c0_g1	323	124	-	-	-	-	-	-	0	0.33	0	0	0	0	0.57	4.58	1.46	0.72	0	0	1.02	0	0	0
TRINITY_DN10736_c0_g2	322	123	-	-	-	-	-	-	2.05	0	1.21	0	0.37	0	0.29	0	0.37	0	0	0	0.77	0.71	0.42	0
TRINITY_DN10736_c1_g1	615	416	-	-	-	-	-	-	0.25	0.3	0.4	0	0.39	0.27	0.31	0.18	0.45	0.13	0.04	0	1.42	0.42	0.08	3.24
TRINITY_DN10737_c0_g1	314	115	-	-	-	-	-	-	14.44	1.08	6.94	0	0	1.3	4.57	0	16.72	9.8	1.11	0	17.39	9.7	6.1	0
TRINITY_DN10737_c0_g2	386	187	-	-	-	-	-	-	0.41	0	0	0	0.5	0	0	0	0	0.07	0	0	0	0	0.02	0
TRINITY_DN10737_c0_g3	240	47.71	-	-	-	-	-	-	1.91	0.86	0	20.33	13.49	2.34	3.57	0.4	1.58	0.93	0.77	13.17	0	2.92	1.36	0
TRINITY_DN10738_c0_g1	711	512	-	-	-	-	-	-	0.23	0.53	2.69	0	0	0.05	4.05	0	0.02	0.55	0.89	0	1.34	0.2	0.14	2.06
TRINITY_DN10738_c0_g2	1418	1137.85	-	-	-	[C] Energy production and conversion	-	-	9.59	3.45	5.43	0.74	9.31	3.31	4.96	1.67	10.03	3.69	2.17	3.37	7.3	3.57	2.37	0
TRINITY_DN10739_c0_g1	206	25.67	-	-	-	-	-	-	5.36	0	7.94	24.97	1.97	1.45	5.11	36.31	3.68	2.08	1.6	21.96	3.6	0.68	0.66	43.45
TRINITY_DN1073_c0_g1	730	531	-	-	-	-	-	-	0.67	1.44	0.59	3.29	0.78	0.7	0.48	0.5	0.28	0.6	0.28	0.93	0.83	1.28	0.99	0
TRINITY_DN10740_c0_g1	958	759	-	-	-	-	-	-	0.03	0	0.86	7.9	0.03	0.05	0.84	18.41	0	0	0.19	5.23	0	0.05	2.04	15.45
TRINITY_DN10741_c0_g1	513	314	-	-	-	-	-	-	0.57	0	0	0	0.43	0	0	1.21	0.4	0	0	0	1.23	0.11	0	0
TRINITY_DN10741_c0_g2	1782	1583	gtf2h2	transcription initiation factor TFIIH subunit H2	GO:0005675(holo TFIIH complex);GO:0008270(zinc ion binding);GO:0006289(nucleotide-excision repair);GO:0006355(regulation of transcription, DNA-dependent);GO:0006366(transcription from RNA polymerase II promoter)	[K] Transcription ;[L] Replication, recombination and repair	K03142	ko03022(Basal transcription factors);ko03420(Nucleotide excision repair)	7.47	0.55	0.65	3.09	6.47	0.5	0.54	1.88	10.04	0.9	0.65	0.79	6.82	0.63	0.6	2.31
TRINITY_DN10741_c0_g3	1668	1469	GTF2H2	transcription initiation factor TFIIH subunit H2	GO:0005675(holo TFIIH complex);GO:0008270(zinc ion binding);GO:0006281(DNA repair);GO:0006468(protein phosphorylation);GO:0006355(regulation of transcription, DNA-dependent);GO:0006366(transcription from RNA polymerase II promoter)	[K] Transcription ;[L] Replication, recombination and repair	K03142	ko03022(Basal transcription factors);ko03420(Nucleotide excision repair)	0.23	0	0	0	1.3	0	0	0	0.7	0	0	0	0.32	0	0	0
TRINITY_DN10743_c0_g1	328	129	-	26S proteasome non-ATPase regulatory subunit 10	-	[O] Posttranslational modification, protein turnover, chaperones	K06694	-	2.44	0	0	0	3.75	0.72	1.98	0.29	0.88	1.38	0	0	4	0.94	0.26	0
TRINITY_DN10743_c0_g2	332	133	-	26S proteasome non-ATPase regulatory subunit 10	-	[O] Posttranslational modification, protein turnover, chaperones	K06694	-	0	0.47	0	4.82	0	0	0	0	0.57	0	0.28	0	0	0	0	0
TRINITY_DN10744_c0_g1	631	432	PCMP-E33	-	GO:0005488(binding)	[R] General function prediction only	-	-	0.68	0.53	0.52	1.12	0.75	0.39	0.15	0	1.88	0.58	0.25	0	0.34	0.89	0.59	0
TRINITY_DN10745_c0_g1	551	346.37	-	-	-	-	-	-	3.59	0	2.18	18.39	1.9	0	2.24	15.55	6.67	0	0.1	0	0	0	3.03	16.93
TRINITY_DN10746_c0_g1	455	256	-	-	-	-	-	-	0.74	0.56	0	1.62	0.36	0	0.17	0	0.37	0.14	0.36	0	0.58	0	0	0
TRINITY_DN10747_c0_g1	425	226	CLPP5	ATP-dependent Clp protease, protease subunit	GO:0009941(chloroplast envelope);GO:0009534(chloroplast thylakoid);GO:0009840(chloroplastic endopeptidase Clp complex);GO:0005524(ATP binding);GO:0004252(serine-type endopeptidase activity);GO:0006508(proteolysis)	[O] Posttranslational modification, protein turnover, chaperones	K01358	ko04112(Cell cycle - Caulobacter)	0	0	0.25	0	0.51	0.9	0.66	1.01	0	0	0	0	0.25	0	0.45	0
TRINITY_DN10747_c0_g2	427	228	CLPP5	ATP-dependent Clp protease, protease subunit	GO:0009941(chloroplast envelope);GO:0009534(chloroplast thylakoid);GO:0009840(chloroplastic endopeptidase Clp complex);GO:0005524(ATP binding);GO:0004252(serine-type endopeptidase activity);GO:0006508(proteolysis)	[O] Posttranslational modification, protein turnover, chaperones	K01358	ko04112(Cell cycle - Caulobacter)	1.84	0	0	0.91	0	0	0	0	0.83	0.55	0	0	0.24	0	0	0
TRINITY_DN10749_c0_g1	554	355	-	male germ cell-associated kinase	-	[T] Signal transduction mechanisms	K08829	-	1.12	0.23	0.31	1.76	0.13	0.05	0.42	4.21	0	0.1	0.1	0	0.31	0.2	0.77	0
TRINITY_DN1074_c0_g1	269	71.55	-	-	-	-	-	-	2.06	0.29	0	0	0	0	0	0	2.11	0.75	0	0	1.03	0	0.24	0
TRINITY_DN10750_c0_g1	390	191	-	-	-	-	-	-	0.77	0.22	0.87	0	0	0.19	0.67	1.59	1.18	0	0.29	2.82	0	0.46	1.78	9.7
TRINITY_DN10751_c0_g1	715	516	-	-	-	-	-	-	0.08	0.07	0.48	0.25	0	0	0.23	0	0.77	0.34	0.28	0	0.68	0	0.14	2.93
TRINITY_DN10751_c0_g2	436	237	-	-	-	-	-	-	0	0.37	0.52	2.02	0.58	0	0.57	3.27	0	0.62	0	0	0	0	0.4	8.28
TRINITY_DN10752_c0_g1	544	345	-	-	-	-	-	-	0.97	1.55	0.81	0.35	0.2	1.45	2.22	1.7	0.76	0.88	0.9	2.99	0.37	0.76	1.63	0
TRINITY_DN10753_c0_g1	246	52.29	-	-	-	-	-	-	12.64	4.34	9.23	15.05	31.26	0	0	5.7	2.88	1.7	0.7	16.72	0.18	0	2.61	35.46
TRINITY_DN10753_c0_g2	247	53.07	-	-	-	-	-	-	0.42	0	0	0	0	0	1.2	0.8	0	0.34	0	0	0	0.66	0	0
TRINITY_DN10753_c0_g3	246	52.29	-	-	-	-	-	-	0.47	0	0	0	0	0	0	0	0	0	0	0	0.18	0	0	0
TRINITY_DN10754_c0_g1	290	91.14	-	-	-	-	-	-	7.15	0.91	1.83	1.52	2.27	1.22	2.1	5.61	5.75	5.77	1.93	0	3.46	1.53	0.37	0
TRINITY_DN10754_c0_g2	293	94.06	-	-	-	-	-	-	0	0	0	0	0	0	0	0	0.84	0.28	0.27	0	0.76	0.37	0	0
TRINITY_DN10755_c0_g1	262	65.42	-	-	-	-	-	-	0	0	0	0	0	0.57	0	2.89	0.58	0.82	0	0	0.56	0.8	0	0
TRINITY_DN10757_c0_g1	358	159	-	-	-	-	-	-	1.45	0.78	0.35	4.47	1.16	3.51	0.94	1.55	0.59	0.45	0.23	0.99	0.23	1.86	1.71	7.68
TRINITY_DN10758_c0_g1	693	494	-	-	-	-	-	-	1.23	0	0.34	0.49	1.54	0.38	0.26	0.27	1.18	0.83	0.11	0	1.6	0.53	0.21	0
TRINITY_DN10759_c0_g1	475	276	-	-	-	-	-	-	0.43	0.17	0	0	1.09	0.61	0	0	1.05	0.09	0	0	0	0.38	0.16	0
TRINITY_DN10759_c0_g2	365	166	-	-	-	-	K00924	-	0	0	0	4.49	0	0	0	0	0	0.14	0.05	0	0	0	0	0
TRINITY_DN1075_c0_g1	266	68.9	-	-	-	-	-	-	0.92	0.6	0	0	0.33	0.27	0.62	4.95	0	0.78	0	0	2.68	1.26	1.73	0
TRINITY_DN10761_c0_g1	661	462	-	-	-	-	-	-	0.55	0.49	0.16	0.52	0.55	0	0	1.11	1.59	0.23	0.08	0	0.92	0.35	0.18	2.1
TRINITY_DN10761_c0_g2	217	32.04	-	-	-	-	-	-	0	0	0	0	0.64	0	0	6.5	0	0	0	0	0	1.5	0	0
TRINITY_DN10762_c0_g1	621	422	-	-	-	-	-	-	0	0.2	1.14	2.09	0	0.18	1.46	4.35	0	0.76	0.61	2.34	0	0.16	0.65	0
TRINITY_DN10763_c0_g1	526	327	-	-	-	-	-	-	1.48	0.25	0.11	0	1.97	0.23	0.26	0.93	1.38	0.22	0	0	0.51	0.16	0.1	0
TRINITY_DN10764_c0_g1	244	50.74	-	-	-	-	-	-	0	0	0	0.67	0	0	0	1.17	0	0	0	8.59	0	0	0	0
TRINITY_DN10764_c0_g2	1215	1016	ATL72	-	GO:0016021(integral to membrane);GO:0008270(zinc ion binding)	[O] Posttranslational modification, protein turnover, chaperones	-	-	0	0	0.69	0	0	0	0	2.66	0	0	0	10.82	0	0	0	18.19
TRINITY_DN10764_c0_g3	1217	1018	ATL72	-	GO:0016021(integral to membrane);GO:0008270(zinc ion binding)	[O] Posttranslational modification, protein turnover, chaperones	-	-	0	0	0	13.14	0	0	0	7.18	0	0	0	22.15	0	0	0	0
TRINITY_DN10764_c0_g4	359	160	-	-	-	-	-	-	0	0	0	5.77	0	0	0	3.11	0.35	0	0	5.56	0	0	0.11	0
TRINITY_DN10764_c0_g5	242	49.21	-	-	-	-	-	-	0	0	0	0	0	0	0	4.87	0	0	0	36.39	0	0	0.35	0
TRINITY_DN10764_c0_g6	1214	1015	ATL72	-	GO:0016021(integral to membrane);GO:0008270(zinc ion binding)	[O] Posttranslational modification, protein turnover, chaperones	-	-	1.12	0.35	1.97	15.12	0.59	0.08	0.91	6.36	1.55	0.11	0.86	0	1.96	0.38	2.56	20.86
TRINITY_DN10764_c0_g7	241	48.46	-	-	-	-	-	-	0	0	0	1.06	0	0	0	0	0	0	0	0	0	0	0	0
TRINITY_DN10765_c0_g1	793	594	-	-	-	-	-	-	0.32	0	0.03	1.11	0.54	0	0.11	1.34	0.27	0.15	0	0	0.5	0.22	0.09	0
TRINITY_DN10765_c0_g2	258	62.02	-	-	-	-	-	-	0.99	0	0	0	0	0	0	0	1.68	0	0	0	0	2.65	0.49	0
TRINITY_DN10766_c0_g1	387	188	-	-	-	-	-	-	3.02	0	0	6.54	3.8	0	0	0	4.01	0.19	0	0	1.08	0.46	0.82	0
TRINITY_DN10768_c0_g1	803	604	-	-	-	-	-	-	12.84	3.41	15.28	21.07	16.33	3.37	12.21	21.02	13.3	5.45	1.7	18.8	8.47	5.02	9.33	48.98
TRINITY_DN10769_c0_g1	527	323.29	-	-	-	-	-	-	61.19	13.66	68.58	25.05	72.21	17.75	40.62	47.16	28.84	22.47	14.36	42.86	34.75	18.46	10.62	42.8
TRINITY_DN1076_c0_g1	207	26.22	GC6	-	GO:0005829(cytosol);GO:0000139(Golgi membrane);GO:0005795(Golgi stack);GO:0005488(binding);GO:0008565(protein transporter activity);GO:0009791(post-embryonic development);GO:0032527(protein exit from endoplasmic reticulum);GO:0048280(vesicle fusion with Golgi apparatus)	[U] Intracellular trafficking, secretion, and vesicular transport	-	-	1.6	0	0	0.66	0.88	0	1.62	23.82	0	0	2.09	0	1.41	0	5.19	0
TRINITY_DN1076_c0_g2	407	208	GC6	-	GO:0005829(cytosol);GO:0000139(Golgi membrane);GO:0005795(Golgi stack);GO:0005488(binding);GO:0008565(protein transporter activity);GO:0009791(post-embryonic development);GO:0032527(protein exit from endoplasmic reticulum);GO:0048280(vesicle fusion with Golgi apparatus)	[U] Intracellular trafficking, secretion, and vesicular transport	-	-	0.1	0.1	0	0	0.66	0.8	0.41	0.36	0	0.86	0	0	0	0.84	0.74	0
TRINITY_DN10770_c0_g1	1014	672.27	eny2	enhancer of yellow 2 transcription factor	GO:0000124(SAGA complex);GO:0003713(transcription coactivator activity);GO:0016568(chromatin modification);GO:0051028(mRNA transport);GO:0045893(positive regulation of transcription, DNA-dependent);GO:0006351(transcription, DNA-dependent)	[K] Transcription	K11368	-	81.87	72.87	32.55	48.46	159.83	65.9	36.92	30.84	66.86	81.8	22.51	25.97	94.22	56.92	18.7	43.34
TRINITY_DN10771_c0_g1	600	401	-	-	-	-	-	-	1.52	0.31	0.09	0	0.29	0.37	0.21	0	2.12	0.4	0.18	0	2.3	0.52	0.04	0
TRINITY_DN10772_c0_g1	2203	1988.61	At4g03415	protein phosphatase	GO:0005886(plasma membrane);GO:0046872(metal ion binding);GO:0004721(phosphoprotein phosphatase activity)	[T] Signal transduction mechanisms	K01090	-	18.79	6.19	4.15	5.23	28.54	8.07	8.19	6.25	20.54	7.44	4.53	2.69	17.86	10.08	7.45	6.73
TRINITY_DN10773_c0_g1	1079	880	MED37E	heat shock 70kDa protein 1/8	GO:0048046(apoplast);GO:0005618(cell wall);GO:0009507(chloroplast);GO:0022626(cytosolic ribosome);GO:0005730(nucleolus);GO:0005886(plasma membrane);GO:0009506(plasmodesma);GO:0005774(vacuolar membrane);GO:0005524(ATP binding);GO:0002020(protease binding);GO:0042742(defense response to bacterium);GO:0050832(defense response to fungus);GO:0010187(negative regulation of seed germination);GO:0046686(…	[O] Posttranslational modification, protein turnover, chaperones	K03283	ko03040(Spliceosome);ko04010(MAPK signaling pathway);ko04144(Endocytosis);ko04612(Antigen processing and presentation)	26.92	10.38	1.54	6.22	45.26	23.78	3.07	2.97	25.08	15.32	1.12	0.08	47.27	14.62	1.45	2.15
TRINITY_DN10774_c0_g1	432	233	-	-	-	-	-	-	0	0.09	0.88	0	1.42	0.72	1.19	0.73	1.13	0	0	0	0.55	0.22	0.58	0
TRINITY_DN10774_c0_g2	432	233	-	-	-	-	-	-	0.54	0	0	0	0.36	0	0	0	0	1.22	0	5.59	0.55	0	0.15	0
TRINITY_DN10774_c1_g1	393	194	-	-	-	-	-	-	0.43	0.21	0.19	0	0	0.77	0.22	1.95	0.39	0.28	0.09	0	0	0.36	0.18	0
TRINITY_DN10775_c0_g1	1089	890	PSAF	photosystem I subunit III	GO:0009941(chloroplast envelope);GO:0009535(chloroplast thylakoid membrane);GO:0016021(integral to membrane);GO:0009538(photosystem I reaction center);GO:0010287(plastoglobule);GO:0015979(photosynthesis)	-	K02694	ko00195(Photosynthesis)	701.26	76.05	3.65	6.4	629.28	128.83	1.6	3.32	559.38	118.64	3.82	0.53	440.71	118.41	1.55	9.6
TRINITY_DN10776_c0_g1	812	613	-	-	-	-	-	-	0.89	0.4	0.06	0.79	0.68	0.33	0.14	0.59	0.61	0.35	0.18	0	0.87	0.77	0.36	0
TRINITY_DN10777_c0_g1	332	133	-	-	-	-	-	-	0.32	1.55	1.81	0	1.04	0	1.28	1.42	1.25	0	0	0	0	0	0.51	0
TRINITY_DN10777_c0_g2	216	31.43	-	-	-	-	-	-	0	0	0	0	0	2.37	0	0	1.9	0	0	0	0	0	0	0
TRINITY_DN10778_c0_g1	540	341	-	-	-	-	-	-	0.43	0.12	0	3.66	0.27	0.11	0.12	2.61	0.22	0	0	0	0	0.1	0.2	2.47
TRINITY_DN10779_c0_g1	217	32.04	-	-	-	-	-	-	0	0	1.16	0	0	0	0	0	0	0	1.71	0	0	0.54	1.06	38.11
TRINITY_DN10779_c0_g2	301	102	-	-	-	-	-	-	2.47	0.4	1.46	0	5.64	0.55	1.25	0	0.92	0.7	0.18	5.06	0.36	2.22	1.17	0
TRINITY_DN1077_c0_g1	418	219	-	-	-	-	-	-	1.25	0	0	0	0.84	0	0.1	0	0.69	0	0	0	0.59	0.48	0.16	0
TRINITY_DN10780_c0_g1	1426	1227	At4g09670	-	GO:0005829(cytosol);GO:0005488(binding);GO:0016491(oxidoreductase activity)	[G] Carbohydrate transport and metabolism ;[Q] Secondary metabolites biosynthesis, transport and catabolism	-	-	0	2.6	1.18	0	10.33	2.35	1.92	0.69	4.51	0	2.64	3.46	8.55	3.37	2.03	0
TRINITY_DN10781_c0_g1	209	27.33	-	-	-	-	-	-	0.77	0	0	0	0	0	0	0	7.59	0	0	0	0	0	0	0
TRINITY_DN10781_c0_g2	209	27.33	RGA4	-	GO:0005524(ATP binding);GO:0006915(apoptosis);GO:0006952(defense response)	-	-	-	0.77	0.75	0	0	11.79	0.68	0	0	0	0	0	0	0	0	0	0
TRINITY_DN10782_c0_g1	782	547.1	-	-	-	-	-	-	19.93	4.19	8.79	4.83	16.61	5.91	6.48	1.74	19.04	4.31	3.29	4.02	11.61	4.91	5.57	3.47
TRINITY_DN10783_c0_g1	1742	1543	At3g60800	-	GO:0016021(integral to membrane);GO:0016746(transferase activity, transferring acyl groups);GO:0008270(zinc ion binding)	[R] General function prediction only	-	-	41.45	9.44	10.19	12.51	43.87	12.23	16.56	11.58	46.22	12.32	7.57	12.91	34.41	12.79	11.14	8.66
TRINITY_DN10784_c0_g1	332	133	-	-	-	-	-	-	1.01	0.47	0	0	0	0.42	0	0	0	0.94	0	7.76	1.39	0.32	0.26	0
TRINITY_DN10784_c0_g2	302	103	-	-	-	-	-	-	0.53	0	0	0	2.01	0	0	0	1.65	0	0	0	0	0.76	0	0
TRINITY_DN10785_c0_g1	2090	1891	PAT1	-	GO:0005737(cytoplasm);GO:0004871(signal transducer activity);GO:0009640(photomorphogenesis);GO:0006355(regulation of transcription, DNA-dependent);GO:0006351(transcription, DNA-dependent)	-	-	-	5.17	2.4	1.6	0.84	7.06	1.66	2.59	3.69	6.07	2.29	1.38	0.47	4.1	1.98	1.61	2.2
TRINITY_DN10786_c0_g1	348	149	-	-	-	-	-	-	0.99	0.14	0	0	1.55	0	0	0	1.01	0.72	0.12	0	0	0.12	0.23	0
TRINITY_DN10787_c0_g1	469	270	-	-	-	-	-	-	0.98	0.3	0	0	0.53	0	0.16	0.42	1.22	0.46	0	0	0.72	0	0	0
TRINITY_DN10787_c0_g2	1355	1156	-	-	-	-	-	-	1.61	0.39	0.42	0.03	0.39	0.16	0.37	0.85	0.58	0.37	0.19	0.43	0.69	0.23	0.32	0.98
TRINITY_DN10788_c0_g1	289	90.17	-	naphthoate synthase	-	-	K01661	ko00130(Ubiquinone and other terpenoid-quinone biosynthesis)	0	0	0	0	0	0	0	5.67	0	0	0	0	0	0	0.76	0
TRINITY_DN10788_c0_g2	291	92.11	-	naphthoate synthase	-	-	K01661	ko00130(Ubiquinone and other terpenoid-quinone biosynthesis)	1.14	0	0	0	1.5	0	0	0	0.82	0.39	0	0	1.4	0	0	0
TRINITY_DN10789_c0_g1	436	237	-	-	-	-	-	-	0.8	0.17	0.24	0	0	0.31	0.9	0.16	0	0	0.15	3.41	1.4	0.15	0.22	0
TRINITY_DN1078_c0_g1	316	117	-	-	-	-	-	-	0.36	0.35	0	0	0	0.32	0	0	0	0	0	0	0	0	0	0
TRINITY_DN1078_c0_g2	336	137	-	-	-	-	-	-	0	0	0	2.28	0	0	0	2.07	0	0	0	0	0	0	0	0
TRINITY_DN10790_c0_g1	885	686	-	-	-	-	-	-	2.36	1.05	0.92	0	2.11	0.98	1.89	0.06	2.67	0.78	0.99	0	1.8	2.03	0.97	0
TRINITY_DN10791_c0_g1	401	202	CPC	myb proto-oncogene protein, plant	GO:0005634(nucleus);GO:0003677(DNA binding);GO:0005515(protein binding);GO:0009913(epidermal cell differentiation);GO:0010063(positive regulation of trichoblast fate specification);GO:0006355(regulation of transcription, DNA-dependent);GO:0009753(response to jasmonic acid stimulus);GO:0009751(response to salicylic acid stimulus);GO:0006351(transcription, DNA-dependent)	-	K09422	-	1.56	0.71	0.46	0	4.33	0.42	1.58	0	2.43	0	0.18	0	1.28	0.09	0	0
TRINITY_DN10791_c0_g2	330	131	CPC	myb proto-oncogene protein, plant	GO:0005634(nucleus);GO:0003677(DNA binding);GO:0005515(protein binding);GO:0009913(epidermal cell differentiation);GO:0010063(positive regulation of trichoblast fate specification);GO:0006355(regulation of transcription, DNA-dependent);GO:0009753(response to jasmonic acid stimulus);GO:0009751(response to salicylic acid stimulus);GO:0006351(transcription, DNA-dependent)	-	K09422	-	0	0	0	0	0	0.35	0	0	0	0	0.28	0	1.41	0	0	0
TRINITY_DN10792_c0_g1	734	535	-	-	GO:0005737(cytoplasm);GO:0006950(response to stress)	[O] Posttranslational modification, protein turnover, chaperones	-	-	0	6.59	11.11	31.86	2.33	10.2	19.71	43.95	0.09	3.28	2.5	28.23	3.94	6.82	8.33	62.07
TRINITY_DN10793_c0_g1	368	169	-	-	-	-	-	-	1.62	0.61	0	0	0.82	0.99	0	0	0.89	0.95	0	0	0	0.21	0.3	0
TRINITY_DN10793_c0_g2	366	167	-	-	-	-	-	-	0	0	0	2.7	0	0	0	1.25	0	0	0	0	0	0	0	0
TRINITY_DN10794_c0_g1	228	39.14	-	-	-	-	-	-	0	1.05	0	0	2.46	0	0	0	0	0.91	0	0	0	0	0	0
TRINITY_DN10794_c0_g2	248	53.86	-	-	-	-	-	-	0.96	0	0	0	3.13	2.15	1.98	2.81	0	1.04	0.68	0	1.03	1.19	0.32	0
TRINITY_DN10794_c0_g3	223	35.82	-	-	-	-	-	-	1.31	0	0	0	0	1.04	0	0	0.53	1	0	0	0	1.94	0	0
TRINITY_DN10794_c0_g4	253	57.88	-	-	-	-	-	-	0	0.92	0	0	3.42	2.47	0.73	0	0	1.02	0	0	0	1.44	0	0
TRINITY_DN10794_c0_g5	286	70.88	-	-	-	-	-	-	4.1	1.07	1.35	3.92	10.86	4.47	0.52	0	1.6	3.57	0	0	0.69	4.62	0.64	0
TRINITY_DN10795_c0_g1	1609	1410	CYP94A2	-	GO:0005789(endoplasmic reticulum membrane);GO:0016021(integral to membrane);GO:0009055(electron carrier activity);GO:0020037(heme binding);GO:0004497(monooxygenase activity);GO:0016705(oxidoreductase activity, acting on paired donors, with incorporation or reduction of molecular oxygen)	[Q] Secondary metabolites biosynthesis, transport and catabolism ;[I] Lipid transport and metabolism	K00517	ko00361(gamma-Hexachlorocyclohexane degradation);ko00626(Naphthalene and anthracene degradation);ko00903(Limonene and pinene degradation);ko00945(Stilbenoid, diarylheptanoid and gingerol biosynthesis)	2.65	0	0	0	1.27	0	0	0	1.36	0.03	0	0	1.67	0	0	0
TRINITY_DN10796_c0_g1	476	277	-	-	-	-	-	-	0.46	0.45	0.34	2.75	1.16	0.94	0.54	0.82	1.43	0	0.13	1.54	0.33	0.57	0.8	0
TRINITY_DN10797_c0_g1	461	262	-	-	-	-	-	-	3.29	0.31	0.28	0	0.26	0.28	1.54	2.02	1.15	0.27	0.14	0	0.49	0.2	0.45	0
TRINITY_DN10798_c0_g1	431	232	-	-	-	-	-	-	0	0	0	0	0	0	0	1.1	0	0	0	0	0	0	1.01	0
TRINITY_DN10798_c0_g2	431	232	-	-	-	-	-	-	0	0	0.75	0	0	0	0	1.84	0	0	0.24	0	0	0	0	0
TRINITY_DN10798_c0_g3	431	232	-	-	-	-	-	-	1.72	0.27	0.37	4.63	0	1.36	1.01	0	1.79	1.07	0.24	4.35	1.43	0.75	2.88	0
TRINITY_DN10799_c0_g1	461	262	-	-	-	-	-	-	0.72	0.24	0	2.25	0.53	0.14	0.08	1.16	0.86	0.27	0.35	0	0	0	0.91	0
TRINITY_DN1079_c0_g1	217	32.04	-	-	-	-	-	-	1.31	0	0	0	0	0.58	1.99	0	0.59	1.11	0	0	4.6	3.8	0.53	0
TRINITY_DN107_c0_g1	925	726	-	-	-	-	-	-	0.93	0.14	0.26	0.43	0.6	0.33	0.23	0.21	0.44	0.49	0.03	0.09	0.94	0.34	0.12	0
TRINITY_DN10800_c0_g1	812	613	-	-	-	-	-	-	0.62	0.54	0.18	0.51	0.75	0.12	0.24	1.57	0.43	0.26	0	0.44	0.66	0.11	0.25	0
TRINITY_DN10801_c0_g1	1302	1103	HPR3	-	-	[C] Energy production and conversion	-	-	10.54	3.24	2.84	7.08	14.07	3.08	7.64	10.38	12.41	3.7	2.09	7.55	16.97	2.26	4.74	12.19
TRINITY_DN10802_c0_g1	615	416	-	-	-	-	-	-	2.58	0.89	0.58	0	3.04	0.27	0.97	0.86	2.36	1.58	0.62	1.67	2.13	2.05	0.45	0
TRINITY_DN10803_c0_g1	425	226	-	-	-	-	-	-	0.93	0.91	2.3	2.68	2.24	1.15	1.04	0.84	1.5	1.66	1.38	0	2.53	1.39	0.9	0
TRINITY_DN10804_c0_g1	5907	5707.18	BIG2	-	-	[U] Intracellular trafficking, secretion, and vesicular transport	-	-	32.22	16.56	7.52	30.31	25.42	21.45	17.75	29.57	42.4	16.94	14.46	20.17	45.37	16.98	22.9	4.06
TRINITY_DN10804_c0_g2	885	686	BIG2	-	-	[U] Intracellular trafficking, secretion, and vesicular transport	-	-	60.59	5.49	5.85	11.73	74.05	3.18	5.13	6.72	48.48	11.97	5.25	0	18.59	6.46	1.28	87.09
TRINITY_DN10806_c0_g1	422	223	-	-	-	-	-	-	1.04	0.67	0	0	0.21	0.71	0	2.38	1.65	0.56	0	0	1	0.47	0.46	0
TRINITY_DN10806_c0_g2	423	224	-	-	-	-	-	-	0	0.17	0	0	0	0.87	1.42	0	0.55	0	0.65	0	0.98	0	0	0
TRINITY_DN10807_c0_g1	516	317	-	-	-	-	-	-	1.26	0.39	2.05	2.13	1.02	1.29	3.56	1.79	0.24	0.73	1.15	0	0.47	2.09	1.77	0
TRINITY_DN10809_c0_g1	429	230	-	-	-	-	-	-	0.21	0.28	0	0.78	1.34	0.11	0	1.56	0.61	0.22	0	5.2	0.34	0.68	0.23	0
TRINITY_DN10809_c0_g2	518	319	-	-	-	-	-	-	12.11	3.03	1.57	4.54	19.96	3.82	1.6	9.5	11.62	2.63	1.43	10.04	5.07	1.91	1.28	13.46
TRINITY_DN1080_c0_g1	353	154	-	-	-	-	-	-	0	0.8	0	0	0	0	0.28	2.46	0.73	0.46	0.24	0	0.56	0.23	0.41	0
TRINITY_DN1080_c0_g2	311	112	-	-	-	-	-	-	0	0	0	0	0	0	0	0	0	0	0	4.01	0.55	0	0.34	0
TRINITY_DN10810_c0_g1	353	154	-	-	-	-	-	-	0.27	0	0	3.37	0	0.24	0	0.74	0.49	0.06	0	0	0	0	0	0
TRINITY_DN10810_c0_g2	353	154	-	-	-	-	-	-	0.27	0	1.21	0	0	0	0.28	0.49	0	0.06	0.12	3.64	0	0.23	0	0
TRINITY_DN10811_c0_g1	562	363	-	-	-	-	-	-	0.81	0.17	0.15	0.57	0.38	0.87	0.18	0.83	0.73	1.08	0.81	0	0.1	1.01	0.61	0
TRINITY_DN10813_c0_g1	237	45.49	-	-	-	-	-	-	0	0.45	0	13.71	0	0.26	1.87	0.75	0.68	0.82	0	0	0	0.43	0	0
TRINITY_DN10813_c0_g2	305	106	-	-	-	-	-	-	1.81	1.19	1.41	0	1.3	1.12	1.81	6.46	4.4	0.66	1.23	17.2	5.91	0.97	3.17	0
TRINITY_DN10814_c0_g1	466	267	-	-	-	-	-	-	0	0.17	0	0.78	0.86	0.08	0	0	0.24	0.09	0	2.94	0	0	0	7.88
TRINITY_DN10814_c0_g2	749	550	-	-	-	-	-	-	0.76	0.37	0.81	0	0	0.2	0.58	0	0.78	0.28	0.57	0	0.4	0.19	0.25	0
TRINITY_DN10815_c0_g1	540	341	-	-	-	-	-	-	1.05	0.06	0	0	1.08	0.11	0.37	0	0.39	0.37	0	0	1.41	0.15	0.2	0
TRINITY_DN10816_c0_g1	965	766	LYK3	-	-	-	K00924	-	0.36	1.23	1.76	0	0.86	0.98	0.08	0.79	0.39	0.49	0.78	0	0.25	0.95	0.39	0
TRINITY_DN10816_c0_g2	928	729	LYK3	-	-	-	-	-	0.09	0.27	0.05	0	0.17	0.35	0.26	0	0.28	0.37	0.68	0	0.28	0.56	0.36	0
TRINITY_DN10816_c0_g3	2143	1944	LYK3	-	-	-	K00924	-	0	0.45	1.57	0	0.01	0.19	0.09	0	0.08	0	1.27	0	0.28	0.35	0.25	0
TRINITY_DN10817_c0_g1	788	589	-	-	-	-	-	-	12.2	5.08	11.16	14.91	12.78	5.43	10.73	10.67	12.58	5.47	3.76	52.19	8.67	4.61	7.72	26.05
TRINITY_DN10818_c0_g1	460	261	-	-	-	-	-	-	0.08	1.76	0.7	4.38	0.27	0.83	0	0.7	0	0.85	0.56	0	0.56	0.65	0.11	0
TRINITY_DN10818_c0_g2	279	80.67	-	-	-	-	-	-	0	0.43	1.41	0	1.42	1	0	0.56	0	0.55	0	0	2.3	0.26	0.07	0
TRINITY_DN10819_c0_g1	294	95.04	-	-	-	-	-	-	12.53	7.81	8.66	11.94	57.65	33.05	26.19	79.67	13.48	13.9	0	0	30.85	32.78	10.03	0
TRINITY_DN10819_c0_g2	293	94.06	-	-	-	-	-	-	22.42	10.97	8.22	31.58	0	0	0	0	30.66	24.96	21.78	46.04	0	0	10.32	19.69
TRINITY_DN1081_c0_g1	241	48.46	-	-	-	-	-	-	0.43	0.85	0	1.07	0	0	0.44	0	0	0.74	0	0	0.76	0.72	0	0
TRINITY_DN1081_c1_g1	430	231	-	-	-	-	-	-	0.27	0	0.8	0	0.1	0	0.46	2.29	0.49	0.23	0.08	0	0.16	0.6	0.66	0
TRINITY_DN10821_c0_g1	239	46.96	-	-	-	-	-	-	2.24	0.44	0	0	0	0	0	0	2.01	0.38	0	0	1.57	0.37	0	0
TRINITY_DN10822_c0_g1	2647	2448	PCMP-H81	-	GO:0009507(chloroplast);GO:0005488(binding);GO:0031425(chloroplast RNA processing)	[R] General function prediction only	-	-	0.49	0.31	0.11	0.41	0.83	0.21	0.23	0.99	1.02	0.25	0.2	0.09	0.63	0.28	0.41	0
TRINITY_DN10822_c1_g1	346	147	PCMP-E76	-	GO:0005488(binding)	[R] General function prediction only	-	-	1.14	0.28	0.63	2.59	0.31	0.25	0.43	1.67	1.8	0.48	0.75	0	0.75	1.07	0.58	0
TRINITY_DN10823_c0_g1	341	112.88	-	-	-	-	-	-	2.81	1.53	1.31	0	0	0.39	0.75	5.62	1.99	2.36	0.26	0	3.12	0.86	0.36	17.2
TRINITY_DN10824_c0_g1	909	710	-	-	-	-	-	-	0.25	0.32	0.1	0	0	0.42	0	0	0.3	0	0	0	0.48	0.37	0	0
TRINITY_DN10824_c0_g2	871	672	-	-	-	-	-	-	0.89	0	0	0	0.24	0	0.09	0	0.81	0.27	0	0	0.21	0	0.08	0
TRINITY_DN10825_c0_g1	866	667	FKBP42	-	GO:0016021(integral to membrane);GO:0005886(plasma membrane);GO:0005774(vacuolar membrane);GO:0005516(calmodulin binding);GO:0003755(peptidyl-prolyl cis-trans isomerase activity);GO:0009734(auxin mediated signaling pathway);GO:0048366(leaf development);GO:0006457(protein folding)	[O] Posttranslational modification, protein turnover, chaperones	-	-	2.24	1.39	1.31	0.34	1.62	0.95	0.48	1.19	1.41	1.44	0.3	0	2.18	0.5	0.43	0
TRINITY_DN10826_c0_g1	2444	2245	PCMP-E4	-	GO:0005488(binding)	[R] General function prediction only	-	-	0.45	0.11	0.23	1.1	1.06	0.25	0.17	0.66	0.79	0.17	0.27	1.11	0.45	0.16	0.4	0.36
TRINITY_DN10827_c0_g1	498	299	-	-	-	-	-	-	0.14	0.14	0	1.74	0	0.25	0.14	2.98	0.13	0	0.12	0	0	0	0.23	0
TRINITY_DN10828_c0_g1	525	326	-	-	-	-	-	-	0.39	0	0.11	2.02	0	0	0.07	1.39	0.29	0	0.11	0.69	0	0.11	0.1	0.71
TRINITY_DN10829_c0_g1	202	23.55	-	-	-	-	-	-	0.89	0	0	0	0	0	0	0	19.18	0	0	0	0	0	0	0
TRINITY_DN10829_c0_g2	716	517	-	-	-	-	-	-	3.67	0	0	0	0	0	0	0	8.47	0	0	0	0	0	0	0
TRINITY_DN10829_c0_g3	764	565	-	-	-	-	-	-	0.43	0	0	0	0	0	0	0	0.5	0	0	0	0	0	0	0
TRINITY_DN10829_c0_g4	666	467	-	-	-	-	-	-	0.63	0	0	2.93	0	0	0	0	0	0	0	0	0	0	0	0
TRINITY_DN1082_c0_g1	348	149	-	-	-	-	-	-	0.28	0	0	0	0	0.25	0	3.68	0.25	0	0	0	0	0.12	0	0
TRINITY_DN10830_c0_g1	538	339	-	-	-	-	-	-	0	0	0.22	0	0	0	0	0.56	0	0	0	0	0.6	0.1	0.1	0
TRINITY_DN10830_c0_g2	537	338	-	-	-	-	-	-	0.99	0.06	0	0	1.5	0	0.06	0	0.72	0.11	0.27	0.8	0	0.21	0	0
TRINITY_DN10831_c0_g1	385	186	-	glycyl-tRNA synthetase	-	[J] Translation, ribosomal structure and biogenesis	K01880	ko00970(Aminoacyl-tRNA biosynthesis)	0	0	0.12	3.98	0	0.31	0	0	1.82	0	0.79	0	0	0	0	0
TRINITY_DN10831_c0_g2	385	186	-	glycyl-tRNA synthetase	-	[J] Translation, ribosomal structure and biogenesis	K01880	ko00970(Aminoacyl-tRNA biosynthesis)	1.36	0.33	0.58	2.45	0	1.09	0	2.34	0.61	1.24	0	0	0.59	1.12	0.82	0
TRINITY_DN10832_c0_g1	2306	2107	PCMP-H15	-	GO:0005739(mitochondrion);GO:0005488(binding)	[R] General function prediction only	-	-	0	0	0	0.03	0.92	0	0	0	0	0	0	0.01	0.87	0.21	0	0
TRINITY_DN10832_c0_g2	2305	2106	PCMP-H15	-	GO:0005739(mitochondrion);GO:0005488(binding)	[R] General function prediction only	-	-	1.25	0.22	0.58	0.37	0.17	0.3	0.64	1.27	1.28	0.4	0.44	0.16	0.09	0.21	0.61	0
TRINITY_DN10834_c0_g1	332	133	-	-	-	[R] General function prediction only	-	-	1.26	0.78	0	0	0	0.42	0	3.13	0.28	0.4	0	0	0	0.26	0.13	0
TRINITY_DN10834_c0_g2	355	156	-	-	-	-	-	-	0	0.13	0.12	0	0	0.36	0	1.7	0.97	0.57	0	0	0	0	0.11	0
TRINITY_DN10835_c0_g1	1792	1593	-	cyclin B	GO:0005634(nucleus);GO:0019901(protein kinase binding);GO:0051301(cell division);GO:0007067(mitosis);GO:0000079(regulation of cyclin-dependent protein kinase activity)	[D] Cell cycle control, cell division, chromosome partitioning	K05868	ko04110(Cell cycle);ko04115(p53 signaling pathway);ko04914(Progesterone-mediated oocyte maturation)	37.54	0.79	0.03	0.04	46.16	0.48	0.19	0	123.88	0.31	0.05	0	17.92	2.1	0.03	0
TRINITY_DN10836_c0_g1	910	711	-	-	-	-	-	-	11.94	17.03	25.22	10.62	32.38	16.78	26.45	12.51	11.21	11.85	13.71	31.24	18.46	10.43	18.22	18.06
TRINITY_DN10837_c0_g1	685	486	-	-	-	[R] General function prediction only	-	-	0.43	0.21	0.15	0.57	0	0.42	0.09	0.04	0.78	0.33	0.56	0	0.53	0.43	0.6	0
TRINITY_DN10838_c0_g1	283	84.42	-	26S proteasome non-ATPase regulatory subunit 10	-	[O] Posttranslational modification, protein turnover, chaperones	K06694	-	2.49	0	1.17	5.74	1.64	1.1	0.76	0.67	2.04	3.16	0	0	0.22	1.86	3.23	0
TRINITY_DN10838_c0_g2	283	84.42	-	26S proteasome non-ATPase regulatory subunit 10	-	[O] Posttranslational modification, protein turnover, chaperones	K06694	-	0	2.44	2.35	6.57	0	0	0	0	1.53	0	2.6	0	0	0	0	0
TRINITY_DN10839_c0_g1	275	76.97	-	-	-	-	-	-	0	0	0	0	0	0	0	0	0	0.12	0	0	0	0	0	0
TRINITY_DN10839_c0_g2	207	26.22	-	-	-	-	-	-	0	0	0	0	0	0	0	0	0	0	0	37.65	0	0	0	0
TRINITY_DN10839_c0_g3	275	76.97	-	-	-	-	-	-	1.64	1.07	0	0	0	0.48	0.55	5.41	2.69	0.12	0.95	0	1.44	1.58	0.22	0
TRINITY_DN10840_c0_g1	424	225	-	-	-	-	-	-	0	0	0.37	1.23	0.2	0	0.78	3.2	0	0	0	0	0	0.23	0.45	0
TRINITY_DN10840_c0_g2	424	225	-	-	-	-	-	-	0.37	0.37	0.36	0	0.2	0.66	0.13	0	1.62	0	0	0	0.49	0	0	0
TRINITY_DN10840_c0_g3	424	225	-	-	-	-	-	-	0	0	0.09	0	0.2	0	0.13	0	1.48	0.24	0	0	0	0	0	0
TRINITY_DN10841_c0_g1	306	107	-	-	-	-	-	-	13.2	1.52	1.04	0.32	8.05	0	0.73	5.58	12.65	0.33	0.34	0	5.17	1.5	0.48	0
TRINITY_DN10842_c0_g1	425	226	-	-	-	-	-	-	0	0.04	0	0	0.8	0.16	0	0	1.42	0.28	0	0	0.07	0.1	0	0
TRINITY_DN10842_c0_g2	406	207	-	-	-	-	-	-	1.38	0	0	0	0.59	0	0	0.91	0.74	0	0	0	0.56	0	0.29	0
TRINITY_DN10842_c0_g3	1197	998	-	-	-	-	-	-	0.37	0.05	0.15	0	0.18	0	0	0	1.77	0.12	0	0	0.94	0.05	0.11	0
TRINITY_DN10843_c0_g1	397	198	-	-	-	-	-	-	0.85	0.52	0.38	0	1.63	0.47	0	6.41	0.38	0.99	0	0	0.37	0.53	0.17	0
TRINITY_DN10843_c1_g1	226	37.8	-	-	-	-	-	-	2.22	0	0	0	0	0.98	0	7.01	0	0	0	0	0	0	0	0
TRINITY_DN10844_c0_g1	337	138	-	-	-	-	-	-	0.81	0	0	0	0	0	0.26	0	0.14	0	0	0	0	0.02	0	0
TRINITY_DN10844_c0_g2	486	287	-	-	-	-	-	-	0.71	1.58	0.39	2.29	0.48	0.78	0.1	1.65	0.13	0.56	0.19	0	1.22	0.11	1.01	0
TRINITY_DN10844_c0_g3	215	30.82	-	-	-	-	-	-	6.82	1.34	4.82	0	0	0.6	0.69	4.3	4.28	2.31	2.37	0	2.39	0.56	1.1	0
TRINITY_DN10845_c0_g1	2007	1808	BAM9	beta-amylase	GO:0005737(cytoplasm);GO:0016161(beta-amylase activity);GO:0043169(cation binding);GO:0000272(polysaccharide catabolic process)	-	K01177	ko00500(Starch and sucrose metabolism)	12.63	4.03	8.38	18.58	10.34	4.76	9.95	11.42	9.39	3.83	3.69	18.78	8.02	4.13	8.67	11.98
TRINITY_DN10846_c0_g1	1433	1234	LAG2	-	GO:0005789(endoplasmic reticulum membrane);GO:0005794(Golgi apparatus);GO:0016021(integral to membrane);GO:0005886(plasma membrane);GO:0008610(lipid biosynthetic process);GO:0002238(response to molecule of fungal origin)	[U] Intracellular trafficking, secretion, and vesicular transport	-	-	9.24	0.88	0.41	0.25	8.04	1.35	1.68	0.75	11.55	1.6	0.82	0	7.03	1.75	1.27	0
TRINITY_DN10846_c0_g2	1031	832	LAG2	-	GO:0005789(endoplasmic reticulum membrane);GO:0005794(Golgi apparatus);GO:0016021(integral to membrane);GO:0005886(plasma membrane);GO:0008610(lipid biosynthetic process);GO:0002238(response to molecule of fungal origin)	[U] Intracellular trafficking, secretion, and vesicular transport	-	-	0.42	1.25	0.53	1.64	0	0.49	0.43	1.62	2.6	0	0.35	1.4	4.26	0	0.98	0
TRINITY_DN10847_c0_g1	577	378	-	-	-	-	-	-	0.33	0.27	1.33	0.73	0.37	0.05	1.07	2.2	1.84	0.71	0.24	0	0.83	0.6	0.59	7.63
TRINITY_DN10848_c0_g1	505	306	-	-	-	-	-	-	0.34	0.13	0	0	0	0	0	0.17	0.17	0	0	1.61	0	0.06	0	0
TRINITY_DN10848_c0_g2	723	524	-	-	-	[O] Posttranslational modification, protein turnover, chaperones	-	-	0	0.08	0.39	1.79	0.7	0.21	0.2	0.99	0.47	0.14	0	0	0.28	0.63	0.16	0
TRINITY_DN10849_c0_g1	739	540	-	-	-	-	-	-	0.82	0	0.07	0.51	0.6	0	0.16	0.49	0.49	0.07	0	1	0	1.19	0.06	0
TRINITY_DN10849_c0_g2	740	541	-	-	-	-	-	-	0	0	0	0	0	0	0	0	0	0	0	0	0.68	0	0	0
TRINITY_DN1084_c0_g1	1040	841	RPL6	large subunit ribosomal protein L6e	GO:0005840(ribosome);GO:0003735(structural constituent of ribosome);GO:0006412(translation)	[J] Translation, ribosomal structure and biogenesis	K02934	ko03010(Ribosome)	576.79	98.97	104.44	207.34	502.19	111.85	148.92	158.17	1144.65	114.44	118.75	178.77	746.82	110.61	117.1	200.45
TRINITY_DN10850_c0_g1	1058	859	-	-	-	-	-	-	7.07	2.59	0.37	0.93	7.05	2.29	1.14	0	7.33	3.28	0.89	0	8.48	2.19	0.36	0
TRINITY_DN10851_c0_g1	1085	813.57	ATL43	-	GO:0016021(integral to membrane);GO:0008270(zinc ion binding)	[O] Posttranslational modification, protein turnover, chaperones	-	-	10.68	8.01	9.81	28.27	15	5.42	9.39	18.74	7.25	10.22	4.44	37.13	14.14	9.3	9.47	43.09
TRINITY_DN10852_c0_g1	541	342	-	-	-	[U] Intracellular trafficking, secretion, and vesicular transport	-	-	3.13	2.23	3.91	8.61	3.9	1.03	1.43	0	5.35	1.25	1.87	4.99	3.72	0.46	1.34	0
TRINITY_DN10852_c0_g2	537	338	PEX11C	-	GO:0005779(integral to peroxisomal membrane);GO:0009506(plasmodesma);GO:0042802(identical protein binding);GO:0016559(peroxisome fission)	[U] Intracellular trafficking, secretion, and vesicular transport	-	-	0	0	0	0	0	0	0	6.27	0	0	0	0	0	0	0	12.39
TRINITY_DN10853_c0_g1	342	143	-	-	-	-	-	-	0	2.74	0	0	0	0.26	0	0	0.26	1.74	0	0	0	1.34	0	0
TRINITY_DN10854_c0_g1	479	280	-	-	-	-	-	-	5.86	2.14	3.65	8.97	6.91	2.19	9.42	6.29	15.89	2.74	2.94	10.5	8.03	3.05	0.73	20.45
TRINITY_DN10855_c0_g1	461	262	MRS2-I	-	GO:0016021(integral to membrane)	[P] Inorganic ion transport and metabolism	-	-	0	0.94	0	0	3.08	0	0.13	1.07	0.2	0.72	0.55	0	1.55	0.27	0	0
TRINITY_DN10855_c0_g2	430	231	MRS2-I	-	GO:0016021(integral to membrane)	[P] Inorganic ion transport and metabolism	-	-	1	0	0.34	0	0	0.97	0.13	2.39	0	0.27	0	0	0	0	0.74	0
TRINITY_DN10855_c0_g3	371	172	MRS2-1	-	GO:0016021(integral to membrane);GO:0005773(vacuole);GO:0015095(magnesium ion transmembrane transporter activity)	[P] Inorganic ion transport and metabolism	-	-	0	0	0.19	0	0	0	0	0.44	0.46	0	0.13	0	0	0	0	0
TRINITY_DN10856_c0_g1	1918	1719	PCMP-H61	-	GO:0005488(binding)	[R] General function prediction only	-	-	0.83	0.24	0.5	0.96	1	0.24	0.24	1.32	1.89	0.24	0.26	0	1.37	0.26	0.29	0
TRINITY_DN10857_c0_g1	297	98.01	-	-	-	-	-	-	0.86	0	0.19	0	0	0.38	1.09	3.48	0.96	0	0.37	0	1.51	0.53	0.17	0
TRINITY_DN10857_c1_g1	414	215	-	-	-	-	-	-	0.1	0.38	0	0	1.07	0.35	0.4	0	0.61	0.33	0.17	0	1.03	0.57	0	0
TRINITY_DN10858_c0_g1	370	169.46	-	-	-	-	-	-	1.4	0.15	0	3.85	0.31	1.16	0.13	0.11	1.83	0.21	0.33	3.87	0	0	0.39	0
TRINITY_DN10859_c0_g1	860	661	-	-	-	-	-	-	0.86	0.31	0.17	0.73	0.56	0.53	0.35	1.75	1.03	0.27	0.11	0	0.56	0.32	0.05	0
TRINITY_DN1085_c0_g1	320	121	-	-	-	-	-	-	0	0	0.15	0	2.85	0.31	1.58	2.19	0.31	0	0	4.82	0.15	0.58	0	0
TRINITY_DN1085_c1_g1	324	125	-	-	-	-	-	-	0.17	0	0.15	0	0.74	0.15	0.68	0.61	0.9	0.43	0.15	0	1.18	0	0	0
TRINITY_DN10860_c0_g1	222	35.18	-	-	-	-	-	-	2.59	0	1.76	15.63	1.44	0.64	2.06	3.45	2.37	1.74	1.09	0	0	2.09	0	0
TRINITY_DN10860_c1_g1	223	35.82	-	-	-	-	-	-	0.59	0	1.55	0	1.29	1.56	0.59	4.23	0	0.99	0	0	0	0	0.95	0
TRINITY_DN10861_c0_g1	216	31.43	-	-	-	-	-	-	10.07	0	9.46	3.83	21.7	6.02	0	0	11.15	0	0	0	0	0	1.87	0
TRINITY_DN10861_c0_g2	219	33.27	-	-	-	-	-	-	19.55	4.96	3.34	4.19	27.25	1.58	6.39	10.24	44.98	2.14	1.65	35.07	45.99	6.8	2.32	110.07
TRINITY_DN10862_c0_g1	945	746	-	-	-	-	-	-	1.24	0.64	0.27	0.65	1.36	0.62	0.77	3.53	2.48	0.6	0.2	1.41	1.98	0.47	0.41	0
TRINITY_DN10863_c0_g1	891	692	-	-	-	-	-	-	0.61	0.06	0.11	0.4	0.8	1.1	0.58	1.64	0.65	0.62	0.08	0	0.93	0.43	0.2	0
TRINITY_DN10864_c0_g1	413	214	SD17	-	GO:0016021(integral to membrane);GO:0005886(plasma membrane);GO:0005524(ATP binding);GO:0004674(protein serine/threonine kinase activity);GO:0004872(receptor activity);GO:0005529(sugar binding);GO:0031625(ubiquitin protein ligase binding);GO:0009738(abscisic acid mediated signaling pathway);GO:0048544(recognition of pollen)	-	K00924	-	0.25	0	0	0	0	0.23	0	0	0	0	0	2.04	3.9	0	0	0.11
TRINITY_DN10864_c0_g2	544	345	SD16	-	GO:0005829(cytosol);GO:0016021(integral to membrane);GO:0005886(plasma membrane);GO:0005524(ATP binding);GO:0004674(protein serine/threonine kinase activity);GO:0005529(sugar binding);GO:0031625(ubiquitin protein ligase binding);GO:0034613(cellular protein localization);GO:0046777(protein autophosphorylation);GO:0048544(recognition of pollen)	-	K00924	-	0	0.28	0.75	1.79	0	0.61	0.92	0.78	0	0	0	0	0	0	0	0
TRINITY_DN10864_c0_g3	543	344	SD16	-	GO:0005829(cytosol);GO:0016021(integral to membrane);GO:0005886(plasma membrane);GO:0005524(ATP binding);GO:0004674(protein serine/threonine kinase activity);GO:0005529(sugar binding);GO:0031625(ubiquitin protein ligase binding);GO:0034613(cellular protein localization);GO:0046777(protein autophosphorylation);GO:0048544(recognition of pollen)	-	K00924	-	0.33	0.86	2.48	4.6	0.4	0.98	5.57	8.96	2.52	0	0.16	0.88	1.11	0.4	0.74	4.64
TRINITY_DN10865_c0_g1	259	62.86	-	-	-	-	-	-	1.77	0	0.3	0.55	0.37	0	0	2.59	1.36	0	1.16	0	0.83	0	0	3.4
TRINITY_DN10865_c0_g2	253	57.88	-	-	-	-	-	-	2.8	2.14	0.96	0	7.96	3.85	0.37	7.98	2.43	0.62	0	0	8.02	3.61	2.94	21.04
TRINITY_DN10866_c0_g1	342	143	PCMP-H24	-	GO:0005488(binding)	[R] General function prediction only	-	-	0	1.15	1.56	1.45	0	0	0	0	0.4	0.12	0	0	0	0.12	0.95	0
TRINITY_DN10867_c0_g1	522	323	WEX	-	GO:0005634(nucleus);GO:0008408(3'-5' exonuclease activity);GO:0003677(DNA binding);GO:0046872(metal ion binding);GO:0005515(protein binding);GO:0006139(nucleobase, nucleoside, nucleotide and nucleic acid metabolic process)	[R] General function prediction only	-	-	0.48	0	0	0	0	0	0	0	0.55	0	0	0	0	0	0.18	0
TRINITY_DN10867_c0_g2	1258	1059	WEX	-	GO:0005634(nucleus);GO:0008408(3'-5' exonuclease activity);GO:0003677(DNA binding);GO:0046872(metal ion binding);GO:0005515(protein binding);GO:0006139(nucleobase, nucleoside, nucleotide and nucleic acid metabolic process)	[R] General function prediction only	-	-	4.16	0.1	0.11	0	3.33	0.16	0.08	0.14	10.14	0.05	0.03	0	1.93	0.08	0.14	0
TRINITY_DN10869_c0_g1	326	127	-	-	-	-	-	-	2.98	0.81	1.61	9.27	5.08	1.9	6.03	1.79	5.19	0.56	1.3	0	1.16	2.6	3.49	0
TRINITY_DN1086_c0_g1	662	463	-	-	-	-	-	-	2.77	0.53	0	0	0	1.41	0.51	0	1.59	1.54	0	0	1.31	1.16	0.18	0
TRINITY_DN1086_c0_g2	658	459	-	-	-	-	-	-	0	0	0.16	0	1.05	1.45	0	0.08	0	0	0	0	0	0.35	0	0
TRINITY_DN10870_c0_g1	1352	1153	Cht1	chitinase	GO:0008061(chitin binding);GO:0004568(chitinase activity);GO:0016998(cell wall macromolecule catabolic process);GO:0006032(chitin catabolic process);GO:0050832(defense response to fungus)	[R] General function prediction only	K01183	ko00520(Amino sugar and nucleotide sugar metabolism)	0.01	0	23.76	426.8	0	0.03	0.56	50.84	0.05	0	3.78	46.68	0.02	0.01	4.88	14.18
TRINITY_DN10870_c0_g2	1352	1153	Cht1	chitinase	GO:0008061(chitin binding);GO:0004568(chitinase activity);GO:0016998(cell wall macromolecule catabolic process);GO:0006032(chitin catabolic process);GO:0050832(defense response to fungus)	[R] General function prediction only	K01183	ko00520(Amino sugar and nucleotide sugar metabolism)	0.01	0	0.21	305.05	0	0	0.37	0	0.05	0	0	19.66	0	0.01	8.09	0
TRINITY_DN10870_c0_g3	564	365	CHIT1B	chitinase	GO:0008061(chitin binding);GO:0004568(chitinase activity);GO:0016998(cell wall macromolecule catabolic process);GO:0006032(chitin catabolic process);GO:0006952(defense response)	[R] General function prediction only	K01183	ko00520(Amino sugar and nucleotide sugar metabolism)	0	0	10.01	612.74	0	0	0.2	22.81	0	0	0.78	74.57	0.08	0	2.74	41.58
TRINITY_DN10871_c0_g1	815	616	-	-	-	-	-	-	1.6	0.1	0.25	0	1.83	1.74	0.48	0.95	1.68	1.16	0.45	0	2.99	0.51	0.25	0
TRINITY_DN10871_c0_g2	645	446	-	-	-	-	-	-	0	0.46	0.11	0	0	0.14	0	0	0	0	0	0	0	0	0	0
TRINITY_DN10872_c0_g1	289	90.17	-	-	-	[R] General function prediction only	-	-	0	0	2.68	1.73	0.51	0	0	1.47	0	0.59	0	0	6.34	0.19	0	0
TRINITY_DN10873_c0_g1	440	241	-	-	-	-	-	-	0.87	1.8	0.15	0	0.19	0	0	0.63	1.64	0.52	0.46	0	0	0.51	0.14	0
TRINITY_DN10874_c0_g1	296	97.02	-	-	-	-	-	-	0	0	0	0	5.46	0.19	0.44	0	0	0	0.63	0	2.47	1.08	0.7	0
TRINITY_DN10874_c0_g2	295	96.03	-	-	-	-	-	-	3.5	0	0.19	5.05	0	0	0.89	0	2.55	0.37	0.32	0	0.19	0	0.18	0
TRINITY_DN10875_c0_g1	917	718	dtl-a	denticleless	GO:0005813(centrosome);GO:0031464(Cul4A-RING ubiquitin ligase complex);GO:0031465(Cul4B-RING ubiquitin ligase complex);GO:0005634(nucleus);GO:0006260(DNA replication);GO:0031572(G2/M transition DNA damage checkpoint);GO:0006513(protein monoubiquitination);GO:0000209(protein polyubiquitination);GO:0009411(response to UV);GO:0019985(translesion synthesis);GO:0006511(ubiquitin-dependent protein cata…	[S] Function unknown	K11790	-	0.94	0	0	0	0.25	0.03	0	0	0	0	0	0	1.02	0	0	0
TRINITY_DN10875_c0_g2	1117	918	dtl-a	denticleless	GO:0005813(centrosome);GO:0031464(Cul4A-RING ubiquitin ligase complex);GO:0031465(Cul4B-RING ubiquitin ligase complex);GO:0005634(nucleus);GO:0006260(DNA replication);GO:0031572(G2/M transition DNA damage checkpoint);GO:0006513(protein monoubiquitination);GO:0000209(protein polyubiquitination);GO:0009411(response to UV);GO:0019985(translesion synthesis);GO:0006511(ubiquitin-dependent protein cata…	[S] Function unknown	K11790	-	1.51	0.13	0	0	1.73	0	0.09	0	3.04	0	0	0	0.2	0.15	0	0
TRINITY_DN10877_c0_g1	432	233	-	-	-	-	-	-	0.27	0	0	0	1.33	0	0	0	0	0	0	4.72	0	0	0	0
TRINITY_DN10877_c0_g2	931	732	-	-	-	-	-	-	0.32	0.03	0	1.18	0.05	0.03	0	1.19	0.62	0.02	0.02	0	0	0.1	0.16	0
TRINITY_DN10878_c0_g1	684	485	STS1	-	GO:0005737(cytoplasm);GO:0047268(galactinol-raffinose galactosyltransferase activity);GO:0009312(oligosaccharide biosynthetic process)	-	-	-	3.69	0	0	0	1.55	0	0	0	3.91	0	0	0	1.01	0	0	0
TRINITY_DN10878_c1_g1	513	314	STS1	stachyose synthetase	GO:0005737(cytoplasm);GO:0047268(galactinol-raffinose galactosyltransferase activity);GO:0009312(oligosaccharide biosynthetic process)	-	K06611	ko00052(Galactose metabolism)	2.13	0	0	0	0.9	0	0.14	0	1.41	0.23	0	0	0.9	0	0	0
TRINITY_DN10879_c0_g1	260	63.71	-	-	-	[R] General function prediction only	-	-	0	1.3	0	0	0	0.58	0	7.43	0	2.8	0.57	0	1.16	0.27	0	0
TRINITY_DN1087_c0_g1	904	705	-	-	-	[R] General function prediction only	-	-	0	0	0	0	0	0	0	1.14	0	0	0	0	0	0	0	0
TRINITY_DN1087_c0_g2	907	708	-	-	-	[R] General function prediction only	-	-	0	0	0.23	0	1.61	0.6	0	0	0	0.4	0	0	0	0	0	0
TRINITY_DN10880_c0_g1	342	143	-	-	-	-	-	-	0.29	0.29	0	0	0.64	0.13	0.74	5.67	0	0.5	0	0	0.26	1.14	0.69	0
TRINITY_DN10880_c0_g2	343	144	-	-	-	-	-	-	0	0.43	0	0	0	0	0.3	0.42	0	0	0.64	0	0	0.56	0.14	0
TRINITY_DN10881_c0_g1	971	772	At5g26960	-	-	[R] General function prediction only	-	-	7.71	3.01	2.12	0.15	3.97	3.98	2.66	0	2.26	4.21	0.9	0	9.47	4.41	1.95	0.93
TRINITY_DN10882_c0_g1	547	348	-	-	-	-	-	-	0	0	0.21	3.93	0	0	0	1.63	0	0	0	4.38	0	0	0.1	0
TRINITY_DN10883_c0_g1	286	87.28	GIP	-	-	[R] General function prediction only	-	-	0	0	0	0	0	0	0	0	0	0	0	0	0	0	0	0
TRINITY_DN10883_c0_g2	224	36.47	GIP	-	-	[R] General function prediction only	-	-	0	0	0	13.3	0	0	0	0	0	0	0	0	0	0	0	0
TRINITY_DN10883_c0_g3	265	68.02	GIP	-	-	[R] General function prediction only	-	-	1.24	0	0	0	0	0	0.63	0	1.66	0.26	0	0	0.27	0	0	0
TRINITY_DN10884_c0_g1	228	39.14	-	-	-	-	-	-	1.61	0	0	0	1.76	0.47	0.54	0	0.48	0.46	0	0	2.36	0	0.43	0
TRINITY_DN10884_c0_g2	297	98.01	-	-	-	-	-	-	1.29	0.63	0.38	0	0	0.56	0	0	0.96	0.36	0.56	0	0.56	0.36	1.56	0
TRINITY_DN10885_c0_g1	976	777	-	-	-	-	-	-	0.64	0.7	0.19	0	0.2	2.34	0.17	0	0.42	2.23	0.33	0	2.45	0.63	0.22	0
TRINITY_DN10885_c0_g2	1238	1039	-	-	-	-	-	-	0.37	0.35	0	0	0.69	1.21	0.08	0.51	0.34	0.91	0.14	0	3.07	0.08	0	0
TRINITY_DN10886_c0_g1	715	516	NFYB7	-	GO:0005634(nucleus);GO:0043565(sequence-specific DNA binding);GO:0006355(regulation of transcription, DNA-dependent);GO:0006351(transcription, DNA-dependent)	[K] Transcription	-	-	2.12	0.72	1.44	0	0.18	1.26	0.25	0	1.72	0.9	0	0	2.54	0.44	0.53	0
TRINITY_DN10887_c0_g1	264	67.15	-	-	-	-	-	-	0.94	0	0	0	0	0	0.32	1.13	0	1.06	0	4.01	0	0.52	0	0
TRINITY_DN10887_c0_g2	264	67.15	-	-	-	-	-	-	1.88	1.23	0	0	0	0	0	0	0.28	0	0	0	0	1.81	0	0
TRINITY_DN10888_c0_g1	338	139	-	-	-	-	-	-	1.97	0.45	0	0	0	0	0	0	0	0	0	0	0	0.63	0	0
TRINITY_DN10888_c0_g2	341	142	-	-	-	-	-	-	0.74	0.15	0	0	1.3	0	0	0.8	0	0	0	0	0	0	0	16.9
TRINITY_DN10889_c0_g1	434	235	-	-	-	-	-	-	0.09	0.88	0.16	0	0	0	0.42	0	0	0	0.39	0	0	0	0.39	0
TRINITY_DN10889_c0_g2	435	236	-	-	-	-	-	-	0	0	0	3.23	0	0.95	0.84	3.77	0	0.6	0	0	0.16	0.66	0.26	0
TRINITY_DN10889_c1_g1	362	163	-	-	-	-	-	-	0.52	1.01	0.91	1.06	0	0.57	0.65	0	0	0.98	0	0	0.11	0.21	0.31	0
TRINITY_DN1088_c0_g1	509	310	OsI_012078	light-harvesting complex II chlorophyll a/b binding protein 2	GO:0009535(chloroplast thylakoid membrane);GO:0016021(integral to membrane);GO:0009522(photosystem I);GO:0009523(photosystem II);GO:0016168(chlorophyll binding);GO:0046872(metal ion binding);GO:0009765(photosynthesis, light harvesting);GO:0018298(protein-chromophore linkage)	-	K08913	ko00196(Photosynthesis - antenna proteins)	7.46	0	0	0	9.95	0.54	0	0	9.79	0.8	0	0	14.33	0.34	0	0
TRINITY_DN10890_c0_g1	894	695	-	-	-	-	-	-	0.51	0.83	0.32	1.07	0.53	0.56	0.49	1.28	1.19	0.36	0.5	0.03	0.13	0.38	1	0
TRINITY_DN10891_c0_g1	278	79.74	-	-	-	-	-	-	0.79	0	0	6.52	0	0	0	4.4	0	0	0	0	0	0.22	0	0
TRINITY_DN10891_c0_g2	277	78.81	-	-	-	-	-	-	0	0	0	0	0	0.24	0	0.84	0	0	0	0	2.57	0.22	0.22	0
TRINITY_DN10892_c0_g1	205	25.13	-	-	-	-	-	-	2.51	0	5.17	2.07	0	0	2.54	1.51	2.25	2.13	1.46	0	2.2	1.38	3.39	0
TRINITY_DN10893_c0_g1	315	116	-	-	-	-	-	-	0	0	0	0	0	0	0	0	2.06	0	0	0	0.22	0	0	0
TRINITY_DN10893_c0_g2	281	82.54	-	-	-	-	-	-	0	0	0	0	0	0	0	0	0.76	0	0.44	3.81	1.93	0	0	0
TRINITY_DN10894_c0_g1	945	746	-	-	-	-	-	-	1.58	0.41	0.3	0	0.96	0.22	0.51	0.15	1.14	0.5	0.02	0	1.66	0.42	0.05	0
TRINITY_DN10895_c0_g1	1460	1261	At5g14450	-	GO:0005576(extracellular region);GO:0009505(plant-type cell wall);GO:0009506(plasmodesma);GO:0016788(hydrolase activity, acting on ester bonds);GO:0016042(lipid catabolic process)	-	-	-	31.5	21.5	11.35	24.74	43.4	27.12	21.09	6.98	30.43	25.12	4.8	1.17	12.97	35.11	4.74	7.16
TRINITY_DN10896_c0_g1	464	265	PERK8	-	GO:0016021(integral to membrane);GO:0005886(plasma membrane);GO:0005524(ATP binding);GO:0004674(protein serine/threonine kinase activity);GO:0005199(structural constituent of cell wall)	[T] Signal transduction mechanisms	-	-	8.01	0.62	0.21	1.18	27.71	0.42	0.32	2.29	10.95	0.87	0	2.88	10.85	1.18	0.19	4.92
TRINITY_DN10897_c0_g1	293	94.06	-	-	-	-	-	-	2.46	2.19	2.76	9.39	3.43	5.34	3.84	18.52	7.81	3.03	5.64	2.39	11.36	4.22	6.15	0
TRINITY_DN10898_c0_g1	1060	861	At5g52970	-	GO:0009543(chloroplast thylakoid lumen)	-	-	-	0.71	0.35	0.53	4.96	0.81	0.07	0.08	2.99	0	0	0	0	0.99	0.18	0.62	0
TRINITY_DN10898_c0_g2	1053	854	At5g52970	-	GO:0009543(chloroplast thylakoid lumen)	-	-	-	2.41	0.27	0.88	4.65	1.29	0.45	0.59	2.7	1.83	0.25	0	4.86	0	0.19	0.33	0.07
TRINITY_DN10899_c0_g1	477	278	-	-	-	-	-	-	0.97	0.52	0	0.06	0	0	0	0	0	0.57	0	0	0	0	0	0
TRINITY_DN10899_c0_g2	454	255	-	-	-	-	-	-	2.4	0	0.22	0	0.27	1.17	0.17	0.74	2.22	0	0.36	0	2.17	0.61	0.07	0
TRINITY_DN1089_c0_g1	574	375	-	-	-	-	-	-	0.22	2.59	0.1	0	0.12	0.99	0	0.4	0.4	0	0	0	0	0.19	0.18	0
TRINITY_DN108_c0_g1	633	434	-	-	-	[R] General function prediction only	-	-	0	0.57	0.86	8.94	0	0.51	0.49	18.89	0	0	0.21	7.76	0	0.24	0.55	11.45
TRINITY_DN10900_c0_g1	365	166	-	-	-	-	-	-	0.51	0.99	0.22	4.17	0.28	0.45	0	1.6	0.91	0.86	1.43	0	0	0.1	0.62	0
TRINITY_DN10901_c0_g1	270	72.44	-	-	-	-	-	-	0	0.28	0	0	0	0	0.29	2.35	0.52	0.98	0	11.15	0	0	0.47	0
TRINITY_DN10901_c0_g2	276	77.89	-	-	-	-	-	-	1.62	0	0	0.89	0	0.72	0	0	0	0	0	0	3.31	0.22	0	0
TRINITY_DN10902_c0_g1	321	122	At5g39865	glutaredoxin 3	GO:0005886(plasma membrane);GO:0009055(electron carrier activity);GO:0015035(protein disulfide oxidoreductase activity);GO:0045454(cell redox homeostasis)	[O] Posttranslational modification, protein turnover, chaperones	K03676	-	3.12	0.17	1.97	9.74	1.2	0.28	0.72	2.25	2.31	0.73	0.2	0	0	0	1.04	0.06
TRINITY_DN10903_c0_g1	579	380	-	-	-	-	-	-	1.29	0	0.67	21.19	4.41	1.59	0.16	5.18	1.56	0.58	0.07	9.29	0.11	0.59	1.72	0
TRINITY_DN10904_c1_g1	673	474	CYP19-4	peptidyl-prolyl cis-trans isomerase A (cyclophilin A)	GO:0005829(cytosol);GO:0005783(endoplasmic reticulum);GO:0005795(Golgi stack);GO:0016020(membrane);GO:0005624(membrane fraction);GO:0005771(multivesicular body);GO:0042277(peptide binding);GO:0003755(peptidyl-prolyl cis-trans isomerase activity);GO:0006457(protein folding)	[O] Posttranslational modification, protein turnover, chaperones	K03767	-	5.16	0.32	0	0	0	1.12	1.77	1.11	3.96	0.48	0	0	1.95	0.81	1.52	0.51
TRINITY_DN10904_c1_g2	1187	988	CYP19-4	peptidyl-prolyl cis-trans isomerase A (cyclophilin A)	GO:0005829(cytosol);GO:0005783(endoplasmic reticulum);GO:0005795(Golgi stack);GO:0016020(membrane);GO:0005624(membrane fraction);GO:0005771(multivesicular body);GO:0042277(peptide binding);GO:0003755(peptidyl-prolyl cis-trans isomerase activity);GO:0006457(protein folding)	[O] Posttranslational modification, protein turnover, chaperones	K03767	-	21.94	6.93	14.26	9.06	28.09	10.08	16.26	9.94	26.7	9.16	8.83	11.7	25.74	10.5	8.98	2.91
TRINITY_DN10904_c1_g3	1202	1003	CYP19-4	peptidyl-prolyl cis-trans isomerase A (cyclophilin A)	GO:0005829(cytosol);GO:0005783(endoplasmic reticulum);GO:0005795(Golgi stack);GO:0016020(membrane);GO:0005624(membrane fraction);GO:0005771(multivesicular body);GO:0042277(peptide binding);GO:0003755(peptidyl-prolyl cis-trans isomerase activity);GO:0006457(protein folding)	[O] Posttranslational modification, protein turnover, chaperones	K03767	-	3.62	1.15	3.08	3.32	6.5	1.35	2.47	0.73	7.04	1.52	1.86	0	4.18	1.36	1.81	0
TRINITY_DN10905_c0_g1	409	205.95	-	-	-	-	-	-	6.51	0.81	0.27	0	33.9	3.63	0.21	0	9.58	3.39	0.18	0	13.32	5.43	0.5	0
TRINITY_DN10906_c0_g1	650	451	-	-	-	-	-	-	0	0.46	0.45	0	0.92	0.08	0	1.81	0	0.2	0	0	0	0	0	0
TRINITY_DN10906_c0_g2	652	453	-	-	-	-	-	-	1.25	0	0	3.1	0	0	0.33	0.41	1.33	0	0.32	2.87	0.73	0.46	0.49	0
TRINITY_DN10907_c0_g1	573	374	GIP	-	-	[R] General function prediction only	-	-	0.62	0.06	0	0	0.55	0.35	0	0	1.06	0.29	0	0	0.89	0.74	0	0
TRINITY_DN10907_c1_g1	295	96.03	-	-	-	[R] General function prediction only	-	-	2.63	0	0	0	0.96	0.39	0.89	0	4.12	0.74	0	0	0	0.18	0	0
TRINITY_DN10908_c0_g1	365	166	-	-	-	-	-	-	0.38	0	0	0	0	0	0.13	0	0.34	0	0	0	1.89	0.21	0.31	0
TRINITY_DN10908_c0_g2	361	162	-	-	-	-	-	-	0	0.51	0	0	0.28	0	0	0.7	0.35	0	0	0	0	0	0	0
TRINITY_DN10909_c0_g1	1225	957.35	PCYT1B	choline-phosphate cytidylyltransferase	GO:0005783(endoplasmic reticulum);GO:0004105(choline-phosphate cytidylyltransferase activity)	[I] Lipid transport and metabolism	K00968	ko00440(Phosphonate and phosphinate metabolism);ko00564(Glycerophospholipid metabolism)	15.72	9.46	9.71	11.27	18.46	14.55	7.93	11.32	14.81	14.78	9.15	11.62	15.41	11.89	10.67	8.36
TRINITY_DN1090_c0_g1	313	114	-	-	-	-	-	-	0	0	0	0	0	0	0	0	1.32	0	0	0	0	0	0	0
TRINITY_DN1090_c0_g2	317	118	-	-	-	-	-	-	0	0.44	0	0	0	0.16	0	0	0	0	0	0	0.94	0	0.14	0
TRINITY_DN1090_c0_g3	303	104	-	-	-	-	-	-	2.43	0.69	0.54	2.33	0	0	0	0	0	0	0.18	0	0	0.17	0	0
TRINITY_DN1090_c0_g4	315	116	-	-	-	-	-	-	0	0	0	0	0	0	0	0	1.46	0	0	0	0	0	0	0
TRINITY_DN10910_c0_g1	692	493	-	-	-	-	-	-	0.9	0.42	0.08	0	1.26	0.64	0.39	0	1.22	1.05	0.15	0	0.82	1.31	0.21	0
TRINITY_DN10911_c0_g1	624	425	-	-	-	-	-	-	0.1	0.21	0	0	0	0	0	0.18	0	0.59	0	0	0	0.28	0.26	0
TRINITY_DN10911_c0_g2	639	440	-	-	-	-	-	-	0	0	0.34	2.99	0.52	0.09	0.48	0	0.26	0	0	0	0.43	0	0.11	0
TRINITY_DN10911_c0_g3	214	30.23	-	-	-	-	-	-	2.05	1.2	0	0	0	1.11	0	0	0	0	0	0	1.72	0.7	0.38	0
TRINITY_DN10912_c0_g1	378	179	-	-	-	-	-	-	0	0	0	1.52	0	0	0	0	0	0	0	0	0	0	0.19	0
TRINITY_DN10912_c0_g2	479	280	-	-	-	-	-	-	0.45	0	0.73	4.6	0	0	0.53	3.92	0	0	0.2	0	0	0.25	0	0
TRINITY_DN10912_c1_g1	376	177	-	-	-	-	-	-	0	0	0.42	4.4	0	0	0.12	0	0	0	0.1	0	0	0	0.19	16.41
TRINITY_DN10913_c0_g1	806	607	-	-	-	-	-	-	0.45	0.27	0	0.91	0	0.24	0.28	0.62	0.22	0.29	0.09	2.14	0.91	0.32	0.5	0
TRINITY_DN10914_c0_g1	332	133	-	-	-	-	-	-	0.79	0	0.28	0	1.38	0	0	0	1.42	0	0	0	1.11	0	0.26	0
TRINITY_DN10915_c0_g1	518	319	-	translation initiation factor eIF-6	-	-	K03264	-	2.11	0.71	0.47	2.44	1.73	0.82	0.8	1.84	1.65	0.56	0.46	6.4	2.2	0.98	0.75	0.59
TRINITY_DN10917_c0_g1	407	208	-	-	-	-	-	-	0.42	0	0	1.35	0	0.27	0	0.3	1	0.34	0.19	0	1.42	0	0.33	0
TRINITY_DN10917_c0_g2	329	130	-	-	-	-	-	-	0.63	0	0	0.78	0	0	0	2.12	0	0	0	0	0	0	0	0
TRINITY_DN10917_c0_g3	604	405	-	-	-	-	-	-	0	0.1	0.05	0	0	0	0	0.06	0.23	0	0.04	0	0	0	0	0
TRINITY_DN10918_c0_g1	988	438.92	-	-	-	-	-	-	0.61	0.77	1.6	7.13	2.3	0.67	1.84	4.69	0.32	0.48	0.28	20.24	0.49	0.42	1.55	3.41
TRINITY_DN10919_c0_g1	225	37.13	-	-	-	-	-	-	0	0	3	0	0	0	0	0	1.02	0.96	0.49	0	3.97	0.47	0.46	0
TRINITY_DN1091_c0_g1	270	72.44	-	-	-	-	-	-	0	0	1.03	0	1.63	1.03	0	1.05	0	0.57	0	0	1.13	0	0	0
TRINITY_DN1091_c0_g2	226	37.8	-	-	-	-	-	-	0	0	0	7.79	1.74	0	0	0	1	1.25	0	0	1.24	0.92	0	0
TRINITY_DN10921_c0_g1	235	44.04	-	-	-	-	-	-	3.34	0.94	2.95	11.8	7.84	0.42	1.93	4.73	2.14	2.43	0	8.15	3.35	0	1.16	0
TRINITY_DN10922_c0_g1	371	172	-	-	-	-	-	-	0	0.6	0.22	0	1.07	0	0	0.88	1.86	0	0	3.65	0.64	0	0.4	0
TRINITY_DN10923_c0_g1	1288	1089	ATG18G	-	-	[R] General function prediction only	-	-	0	0	0	0	0	0	0.73	0	0	0	0	0	0	0.27	0.06	0.37
TRINITY_DN10923_c0_g2	2229	2030	ATG18G	-	-	[R] General function prediction only	-	-	3.96	1.43	1.51	4.31	4.51	1.76	1.27	4.72	3.25	1.4	1.29	5.37	2.81	1.73	3.1	6.31
TRINITY_DN10925_c0_g1	371	172	-	-	-	-	-	-	2.71	0	0	1.41	0	0	0	0	5.84	0	0	0	5.45	0	0	0
TRINITY_DN10925_c0_g2	380	181	-	-	-	-	-	-	1.48	0	0.41	0	1.78	0.21	0	0	1.12	0.49	0	9.3	2.46	0.38	0.09	0
TRINITY_DN10926_c0_g1	710	511	-	-	-	-	-	-	51.5	8.88	15.37	38.64	65.46	9.93	22.77	52.72	113.09	10.81	11.81	28.81	54.27	8.48	16.86	71.38
TRINITY_DN10927_c0_g1	369	170	At5g61440	-	GO:0009507(chloroplast);GO:0009055(electron carrier activity);GO:0015035(protein disulfide oxidoreductase activity);GO:0045454(cell redox homeostasis);GO:0022900(electron transport chain);GO:0006662(glycerol ether metabolic process);GO:0006810(transport)	[O] Posttranslational modification, protein turnover, chaperones	-	-	0	0	0	2.41	0	0	0	0.45	0	0	0.22	0	0	0	0	0
TRINITY_DN10927_c0_g2	362	163	-	-	-	[O] Posttranslational modification, protein turnover, chaperones	-	-	0	0	0.46	3.75	0	0	0	0	0	0	0	5.37	0	0	0	0
TRINITY_DN10928_c0_g1	413	214	-	-	-	-	-	-	0.79	0.39	0.52	0.32	1.4	0.43	0.2	0	1.06	0.75	0	0	2.33	0.65	0.64	0
TRINITY_DN10929_c0_g1	493	294	-	-	-	-	-	-	1.14	0.84	0	0.77	1.57	1.2	0.29	7.08	1.09	0.97	0.31	0.99	1.25	0.65	0.87	0
TRINITY_DN1092_c0_g1	693	494	At3g21360	-	GO:0005634(nucleus);GO:0046872(metal ion binding);GO:0016491(oxidoreductase activity)	-	-	-	1.97	2.71	3.01	2.42	1.35	2.55	4.69	1.73	1.53	1.84	1.59	13.21	0.37	1.4	3.03	5.41
TRINITY_DN10930_c0_g1	221	34.54	-	-	-	-	-	-	1.66	0	0.54	0	4.19	1.52	0	7.98	0	0.07	0	0	0	1.16	0.04	0
TRINITY_DN10930_c0_g2	1048	849	-	-	-	-	-	-	0.55	1.7	0.24	0.82	1.35	1.14	0.45	0.48	0.44	1.65	0.37	0	0.83	0.94	0.22	0
TRINITY_DN10931_c0_g1	1482	875.87	At3g16210	-	-	-	-	-	17.36	6.03	18.14	13.23	12.4	5.94	12.65	10.62	19	6.94	5.18	17.68	11.09	8.35	5.72	11.95
TRINITY_DN10932_c0_g1	288	89.2	-	-	-	-	-	-	0	0	0	0	0	0	0	4.88	0	0	0	0	0	0	0.38	0
TRINITY_DN10933_c0_g1	373	174	APK1A	-	GO:0009507(chloroplast);GO:0005886(plasma membrane);GO:0005524(ATP binding);GO:0004674(protein serine/threonine kinase activity);GO:0004713(protein tyrosine kinase activity)	[T] Signal transduction mechanisms	K00924	-	0	0	0	0	0	0	0	0	0.54	0.23	0	0	0	2.07	0	0
TRINITY_DN10933_c0_g2	202	23.55	APK1A	-	GO:0009507(chloroplast);GO:0005886(plasma membrane);GO:0005524(ATP binding);GO:0004674(protein serine/threonine kinase activity);GO:0004713(protein tyrosine kinase activity)	[T] Signal transduction mechanisms	K00924	-	0.89	0	0	0	0	0	0	15.27	0	0.57	0	0	0	0.96	0	0
TRINITY_DN10934_c0_g1	682	483	AKR4C10	alcohol dehydrogenase (NADP+)	GO:0005829(cytosol);GO:0005634(nucleus);GO:0016491(oxidoreductase activity)	[R] General function prediction only	K00002	ko00010(Glycolysis / Gluconeogenesis);ko00561(Glycerolipid metabolism);ko00930(Caprolactam degradation)	2.66	0.51	0.42	0.57	3.56	0.5	0.22	0	1.46	1.25	0.27	0	2.21	0.28	0.11	0
TRINITY_DN10934_c0_g2	834	635	AKR4C10	alcohol dehydrogenase (NADP+)	GO:0005829(cytosol);GO:0005634(nucleus);GO:0016491(oxidoreductase activity)	[R] General function prediction only	K00002	ko00010(Glycolysis / Gluconeogenesis);ko00561(Glycerolipid metabolism);ko00930(Caprolactam degradation)	3.76	0.42	0	0	5.58	0	0	0	4.08	0.14	0.17	0	2.26	0.11	0.11	0
TRINITY_DN10935_c0_g1	705	506	ASAT1	-	GO:0016021(integral to membrane);GO:0005515(protein binding);GO:0016746(transferase activity, transferring acyl groups);GO:0016127(sterol catabolic process);GO:0034434(sterol esterification)	-	-	-	0.91	0.53	0.44	1.57	1.09	0.18	0	0.39	0.6	0.42	0.43	1.63	0.66	0.03	0	0
TRINITY_DN10936_c0_g1	1348	1149	PERK2	-	GO:0016021(integral to membrane);GO:0005886(plasma membrane);GO:0005524(ATP binding);GO:0004674(protein serine/threonine kinase activity);GO:0004872(receptor activity)	-	-	-	10.81	3.19	7.71	6.67	7.97	3.1	5.63	11.35	4.7	3.82	2.86	8.26	6.71	1.14	3.5	15.64
TRINITY_DN10936_c0_g2	1348	1149	PERK9	-	GO:0016021(integral to membrane);GO:0005886(plasma membrane);GO:0005524(ATP binding);GO:0004674(protein serine/threonine kinase activity)	-	-	-	0	2.71	5.07	4.82	6.7	2.96	8.85	11.85	8.11	0	3.24	6.92	9.9	2.3	4.11	26.6
TRINITY_DN10937_c0_g1	1115	916	-	-	-	-	-	-	14.29	3.18	3.8	8.55	14.98	4.32	4.58	4.38	21.96	2.88	4.05	4.16	14.52	5.09	4.35	5.85
TRINITY_DN10937_c0_g2	1033	834	-	-	-	-	-	-	0.53	0	0.12	0	0	0	0	0	0	0	0	0	0.41	0	0	4.91
TRINITY_DN10938_c1_g1	1170	939.25	At1g67360	-	GO:0005773(vacuole)	-	-	-	277.81	97.24	131.2	160.75	312.44	136.43	120.22	140.5	202.33	116.01	73.94	131.39	197.37	129.03	72.3	214.12
TRINITY_DN10939_c0_g1	2343	2144	-	-	-	-	-	-	23.29	8.04	6.88	19.54	23.13	8.56	10.76	20.99	28.14	7.15	7.17	15.77	20.81	9.15	10.95	13.45
TRINITY_DN1093_c0_g1	483	284	-	-	-	-	-	-	0.22	0.36	0	0.49	0	0.59	0.45	0	0	0	0.9	4.42	0.19	0.43	0.36	0
TRINITY_DN10940_c0_g1	627	428	-	-	-	-	-	-	0.93	1.01	0.22	1.46	0	0.35	0	1.77	0.66	0.25	0.17	0	1.12	0.16	0.36	0
TRINITY_DN10941_c0_g1	266	68.9	-	-	-	-	-	-	3.36	0.3	0	0	0	0.81	0	4.12	2.19	1.29	1.06	0	1.61	0.76	0	0
TRINITY_DN10942_c0_g1	650	451	-	-	-	-	-	-	0.7	0.32	0.37	1.65	0	0.41	0.42	3.53	0.13	0.59	0.41	2.99	0.33	0.19	1.32	0
TRINITY_DN10943_c0_g1	381	182	-	-	-	-	-	-	0.35	0.23	0.2	2.38	1.26	0.41	0	2.18	1.35	0.39	1.61	0	2.74	0.38	0.56	0
TRINITY_DN10943_c1_g1	368	169	-	-	-	-	-	-	1.24	0	0	0	0.27	0.22	0.88	0	2.12	0.21	0.43	0	0.55	0.31	0.3	0
TRINITY_DN10944_c0_g1	1216	1017	ESC	-	GO:0005634(nucleus);GO:0003680(AT DNA binding);GO:0003690(double-stranded DNA binding);GO:0006325(chromatin organization);GO:0010150(leaf senescence);GO:0009640(photomorphogenesis)	-	-	-	14.84	24.62	9.05	0	9.78	36.24	4.79	0.11	7.23	16.38	11.29	0	19.29	26.78	12.76	0
TRINITY_DN10945_c0_g1	328	129	-	-	-	-	-	-	1.47	0.32	0	0	0.89	0.43	0	1.32	0.88	0.97	0	1.74	0	2.16	0	0
TRINITY_DN10945_c1_g1	272	74.24	-	-	-	-	-	-	5.38	0.28	0	0	5.27	0.25	0	0	0	0.72	0	2.12	0	1.64	0	0
TRINITY_DN10946_c0_g1	258	62.02	-	DET1- and DDB1-associated protein 1	-	[S] Function unknown	K11792	-	0.34	1.33	0	0	0	0.53	0	0	0	0	0	0	0	0.34	0	0
TRINITY_DN10946_c0_g2	201	23.03	-	-	-	-	-	-	0	0	0.81	0	0	1.81	8.31	0	0	0.77	0.79	0	0	1.34	2.22	0
TRINITY_DN10947_c0_g1	2680	2481	-	-	-	[K] Transcription	-	-	11.51	5.55	3.91	27.72	15.39	7.18	7.66	35.5	14.11	6.91	5.09	28.05	12.82	8.6	10.46	15.86
TRINITY_DN10948_c0_g1	453	254	-	-	-	-	-	-	0.17	0.24	0	0.27	0	0.15	0.17	3.43	0.45	0.14	0.72	0	0.07	0.34	0.47	0
TRINITY_DN10949_c0_g1	286	87.28	-	-	-	-	-	-	0	0	15.65	77.31	11.54	0	0	58.19	4.53	4.36	0	0	0	0	0	0
TRINITY_DN10949_c0_g2	286	87.28	-	-	-	-	-	-	3.87	5.76	0	0	11.54	0	0.42	49.55	0.76	0	8.66	0	0	5	8.55	76.18
TRINITY_DN10949_c0_g3	247	53.07	-	-	-	-	-	-	1.48	0	14.54	19.07	0	0	0	0	0	0	0	0	0	0	0	0
TRINITY_DN10949_c0_g4	245	51.51	-	-	-	-	-	-	1.21	2.92	16.33	0	9.18	0	0	17.4	0	8.86	4.13	0	0	10.96	4.04	4.34
TRINITY_DN10949_c0_g5	286	87.28	-	-	-	-	-	-	0	0	0	0	0	0	0	0	0	0	0	0	0	0	0.53	0
TRINITY_DN10949_c0_g6	233	42.61	-	-	-	-	-	-	0.96	3.39	0	0	0	3.66	13.13	0	0	0	2.46	29.67	0	3.51	7.03	71.28
TRINITY_DN10949_c0_g7	298	99	-	-	-	-	-	-	3.03	4.45	1.42	0	0	5.56	19.77	0.18	1.05	0	3.38	4.23	2.61	5.95	11.12	17.26
TRINITY_DN1094_c0_g1	246	52.29	-	-	-	-	-	-	0	0	0	3	0	0.71	0.41	18.83	0.72	0	1.4	0	0	0.33	0.65	0
TRINITY_DN10950_c0_g1	332	133	-	-	-	-	-	-	1.42	0.31	0.14	0	5.54	0.84	0	0	1.84	0.54	0.14	0	2.5	0.79	0.13	0
TRINITY_DN10951_c0_g1	2658	2149.48	pcnB	tRNA nucleotidyltransferase (CCA-adding enzyme)	GO:0005524(ATP binding);GO:0004652(polynucleotide adenylyltransferase activity);GO:0003723(RNA binding);GO:0006378(mRNA polyadenylation);GO:0006276(plasmid maintenance);GO:0006351(transcription, DNA-dependent)	[J] Translation, ribosomal structure and biogenesis	K00974	-	5.92	1.46	2.71	12.07	6.17	1.58	4.8	18.81	10.99	1.33	2.07	15.72	4.97	1.53	4	27.97
TRINITY_DN10952_c0_g1	243	49.97	-	-	-	-	-	-	1.26	0	0.37	0	2.3	0	0	0	2.64	0.71	0	0	0	0	0.34	0
TRINITY_DN10952_c0_g2	239	46.96	-	-	-	-	-	-	0	0	0	0	0	4.75	4.55	0	0	0	0	0	12.48	3.34	3.99	0
TRINITY_DN10953_c0_g1	459	260	-	-	-	-	-	-	0.49	0	0	0	0.35	0.29	0	0	0.94	0.34	0	0	2.2	0.67	0.13	0
TRINITY_DN10954_c0_g1	343	144	-	-	-	-	-	-	0	0.86	0	0	0	1.01	0.54	0	0	0	0	0	0	0	0	0
TRINITY_DN10954_c0_g2	454	255	-	-	-	-	-	-	2.14	0.57	0	0	4.88	0.16	0.28	0	4.36	0.63	0.14	0	6.44	0.68	0	0
TRINITY_DN10955_c0_g1	365	166	CCDC25	-	-	[R] General function prediction only	-	-	1.46	0.51	0	3.76	0.07	0	0	0	1.14	0.25	0.37	0	0	0	0	0
TRINITY_DN10955_c0_g2	365	166	CCDC25	-	-	[R] General function prediction only	-	-	1.45	0.85	0.22	0	0.07	0.67	2.56	0	0	0.61	0.62	0	1.78	1.15	2.67	0
TRINITY_DN10956_c0_g1	1017	818	HAT22	homeobox-leucine zipper protein	GO:0005634(nucleus);GO:0043565(sequence-specific DNA binding);GO:0003700(sequence-specific DNA binding transcription factor activity);GO:0009735(response to cytokinin stimulus)	[K] Transcription	K09338	-	0.26	0.05	0.59	1.56	0.11	0.2	0.16	0	0.05	0.26	0.27	0	0	0.09	0	2.26
TRINITY_DN10956_c0_g2	1055	856	HAT22	homeobox-leucine zipper protein	GO:0005634(nucleus);GO:0043565(sequence-specific DNA binding);GO:0003700(sequence-specific DNA binding transcription factor activity);GO:0009735(response to cytokinin stimulus)	[K] Transcription	K09338	-	0	0	0	0.82	0	0	0	5.97	0	0	0	5.5	0	0	0.24	0
TRINITY_DN10957_c0_g1	510	311	-	-	-	-	-	-	0	0.07	0	0.78	0.62	0	0	0.67	0	0	0	0	0	0	0	0
TRINITY_DN10957_c0_g2	839	640	-	-	-	-	-	-	0	0.2	0	0	1.57	0.24	0.42	2.81	0	0	0	0	0	0.27	0.24	0
TRINITY_DN10957_c0_g3	356	157	-	-	-	-	-	-	0	0.09	0	1.54	0	0.34	0.05	0	0	0	0.12	0	0	0.67	0	0
TRINITY_DN10958_c0_g1	836	637	-	-	-	-	-	-	0.92	0.39	0	0	0.98	0.41	0	0	2.43	0.62	0	0	1.16	0.44	0.05	0
TRINITY_DN1095_c0_g1	448	249	-	-	-	-	-	-	0.17	0.17	0	0	0.92	0	0	0	0.45	2.15	0	0	0	0.42	0	0
TRINITY_DN10960_c0_g1	428	229	-	-	-	-	-	-	42.96	0	0	0	76.61	0	0	0	31.11	0	0	0	0.16	0	0	0
TRINITY_DN10961_c0_g1	562	363	-	-	-	-	-	-	1.8	0	0	0.19	0.63	0.1	0.47	2.19	3.06	0.15	0	0	0.71	0.29	0.52	0
TRINITY_DN10962_c0_g1	891	692	-	-	-	-	-	-	1.28	0.33	0	0	0	0	0.12	0	0.77	0.04	0.11	0	0.53	0.38	0	0
TRINITY_DN10962_c0_g2	883	684	-	-	-	-	-	-	0	0	0	0.61	0.24	0.08	0	0	0.57	0.22	0	0	0	0	0	0
TRINITY_DN10963_c0_g1	1116	917	fam206a	-	GO:0005960(glycine cleavage complex);GO:0006546(glycine catabolic process)	[E] Amino acid transport and metabolism	-	-	13.48	4.03	11.56	18.21	12.28	4.36	8.21	22.56	25.18	4.6	4.89	24.52	14.5	4.27	7.45	31.47
TRINITY_DN10964_c0_g1	500	301	-	-	-	-	-	-	0.21	0.27	0.12	1.15	0	0.06	0.57	2.89	0.63	0.18	0	0	1.53	0	0	0
TRINITY_DN10965_c0_g1	484	285	-	-	-	-	-	-	0.97	0.14	0	0	1.59	0	0	0	0.95	0.06	0	0	0	0	0	0
TRINITY_DN10965_c0_g2	229	39.82	-	-	-	-	-	-	3.56	0	0	0	8.84	0.47	0	0	0	0	0	0	0	0	0	0
TRINITY_DN10965_c0_g3	486	287	-	-	-	-	-	-	3.01	0	0	0	0	0.13	0	0	4.9	0	0	0	1.16	0	0	0
TRINITY_DN10966_c0_g1	659	460	-	-	-	-	-	-	3.15	0	0.52	0	4.25	0.36	0.37	0	3.65	0.27	0.04	0	1.56	0.68	0.33	0
TRINITY_DN10967_c0_g1	715	516	-	-	-	-	-	-	2.61	1.72	1.94	1.11	0.13	0.25	0	3.89	2.96	1.9	2.16	1.35	0.71	1.15	0.13	0
TRINITY_DN10968_c0_g1	411	212	-	-	-	-	-	-	2.08	0	0	0	3.37	0	0	0	0.89	0	0	0	0.96	0	0	0
TRINITY_DN10969_c0_g1	976	777	-	-	-	-	-	-	1.43	0.32	0.45	1.52	0.18	0.69	0.22	0.39	0.46	0.34	0.42	3.21	1.54	0.27	0.11	0
TRINITY_DN1096_c0_g1	276	77.89	-	-	-	-	-	-	0.27	0	0	0	0	0	0.55	3.89	0.48	0	0	0	0	2.01	0.87	0
TRINITY_DN10970_c0_g1	315	116	PSAF	photosystem I subunit III	GO:0009941(chloroplast envelope);GO:0009535(chloroplast thylakoid membrane);GO:0016021(integral to membrane);GO:0009538(photosystem I reaction center);GO:0010287(plastoglobule);GO:0015979(photosynthesis)	-	K02694	ko00195(Photosynthesis)	0	0	0	1.96	0	0	0	2.8	0	0	0	0	0	0	0	2.18
TRINITY_DN10970_c0_g2	315	116	PSAF	photosystem I subunit III	GO:0009941(chloroplast envelope);GO:0009535(chloroplast thylakoid membrane);GO:0016021(integral to membrane);GO:0009538(photosystem I reaction center);GO:0010287(plastoglobule);GO:0015979(photosynthesis)	-	K02694	ko00195(Photosynthesis)	0	0	0	1.47	0	0	0	2.1	0	0	0	0	0	0	0	0.54
TRINITY_DN10972_c0_g1	331	132	-	-	-	-	-	-	0.32	0.63	0	0	2.27	0	0.64	4.88	1	0.54	0	0	0.98	0	0	0
TRINITY_DN10973_c0_g1	1580	1381	OSB1	-	GO:0048046(apoplast);GO:0005739(mitochondrion);GO:0003697(single-stranded DNA binding);GO:0000002(mitochondrial genome maintenance);GO:0045910(negative regulation of DNA recombination)	-	-	-	24.75	4	3.84	12.25	23.17	3.93	7.49	9.61	31.13	5.78	4.05	6.21	18.81	5.7	8.53	13.43
TRINITY_DN10974_c0_g1	492	293	-	-	-	-	-	-	0.5	0.35	0.32	0.83	0	0.06	0.41	0.13	0.13	0.36	0.48	0	0	0.42	1.22	0
TRINITY_DN10974_c0_g2	216	31.43	-	-	-	-	-	-	0	0	0.57	0	0	0	0.92	1.2	0	0	1.94	0	0	1.1	0	0
TRINITY_DN10975_c0_g1	953	754	-	-	-	-	-	-	0.36	0	0	0.01	0.31	0	0.08	1.68	0.87	0.14	0	3.38	0.14	0.02	0.07	0
TRINITY_DN10975_c0_g2	319	120	-	-	-	-	-	-	0	0	0	3.71	0	0	0.57	0	0	0	0.3	13.37	1.4	0	0	0
TRINITY_DN10976_c0_g1	223	35.82	-	-	-	-	-	-	6.43	0	1.04	0	8.38	0	4.75	0	3.75	0.5	1.53	0	2.05	1.75	0.95	0
TRINITY_DN10976_c0_g2	236	44.76	-	-	-	-	-	-	3.78	2.77	0	0	0.49	0	0	0	2.47	0.4	0	0	4.12	0.93	0	0
TRINITY_DN10977_c0_g1	449	250	-	-	-	-	-	-	0.42	0.74	0.15	1.11	1.75	0.79	0.14	0	1.13	0.64	0.07	0	0	0.25	0.14	0
TRINITY_DN10977_c0_g2	451	252	-	-	-	-	-	-	0	0	0	0	0	0.39	0.28	0	0	0	0	0	0.29	1.89	0.27	0
TRINITY_DN10978_c0_g1	309	110	-	-	-	-	-	-	0	0	0	4.57	0.1	0.17	0	0	0	0	0	0	0.17	0	0	0
TRINITY_DN10978_c0_g2	309	110	-	-	-	-	-	-	0	0	0	0	0.1	0	0	0	0	0	0	0	0.34	0	0.31	0
TRINITY_DN10978_c0_g3	319	120	-	-	-	-	-	-	0.18	0.34	0.15	0	0	0.16	0	0	0.79	0	0.3	0	0	0	0	0
TRINITY_DN10979_c0_g1	270	72.44	-	-	-	-	-	-	1.74	1.99	0.26	0	0.64	0.26	0	0.52	1.56	1.97	0.5	0	1.27	1.68	1.18	0
TRINITY_DN1097_c0_g1	214	30.23	-	-	-	-	-	-	0	0	0	0	4.57	1.84	0	0	1.87	1.77	0	0	11.59	0	0	0
TRINITY_DN10980_c0_g1	761	562	-	-	-	-	-	-	1.87	0	0	0	3.77	0.03	0	0	3.15	0.06	0.07	0	0.43	0	0	0
TRINITY_DN10981_c0_g1	214	30.23	-	-	-	-	-	-	2.78	2.73	0	0	0	6.15	0	0	0	3.54	0	0	14.03	2.3	0	0
TRINITY_DN10981_c0_g2	214	30.23	-	-	-	-	-	-	0	0	0	0	0	0	0	0	10.6	0	0	0	0	0	0	0
TRINITY_DN10981_c1_g1	327	128	-	-	-	-	-	-	2.3	0	0	0	1.44	0	0	0	0.29	0.56	0	0	1.87	0.68	0	0
TRINITY_DN10982_c0_g1	563	364	-	-	-	-	-	-	1.78	1.6	7.51	9.49	5	1.96	2.09	3.28	4.09	1.62	1.85	6.47	3.04	1.8	1.83	4.51
TRINITY_DN10982_c0_g2	1210	1011	CYP707A5	cytochrome P450, family 26, subfamily A	GO:0016021(integral to membrane);GO:0010295((+)-abscisic acid 8'-hydroxylase activity);GO:0009055(electron carrier activity);GO:0020037(heme binding);GO:0006950(response to stress)	[Q] Secondary metabolites biosynthesis, transport and catabolism ;[I] Lipid transport and metabolism	K07437	ko00830(Retinol metabolism)	0.03	0.73	0.17	0.04	0	0.1	2.05	0	0	0.37	0.46	0	0	0.14	0.38	0
TRINITY_DN10982_c0_g3	923	724	CYP707A5	cytochrome P450, family 26, subfamily A	GO:0016021(integral to membrane);GO:0010295((+)-abscisic acid 8'-hydroxylase activity);GO:0009055(electron carrier activity);GO:0020037(heme binding);GO:0006950(response to stress)	[Q] Secondary metabolites biosynthesis, transport and catabolism ;[I] Lipid transport and metabolism	K07437	ko00830(Retinol metabolism)	0	0	0.62	0	0	0	0	0	0.1	0	0	0	0	0	0	0
TRINITY_DN10983_c0_g1	389	190	-	-	-	-	-	-	1.66	0.98	0.59	0	0.24	1.27	0.11	1.49	3.47	0.47	0.29	0	1.75	1.01	0.27	0
TRINITY_DN10984_c0_g1	927	728	-	-	-	-	-	-	0	0.77	0	0.45	0	0.31	0	0.47	0	0.24	0.13	0	0	0	0	0
TRINITY_DN10984_c0_g2	917	718	-	-	-	-	-	-	0.23	0	0.1	0.32	0.26	0	0.06	0	0	0	0	0	1	0.27	0.26	0
TRINITY_DN10985_c0_g1	262	65.42	-	-	-	-	-	-	6.1	0	0.85	0	0	1.7	0	0	3.75	0	0	0	0	0	0.78	0
TRINITY_DN10986_c0_g1	272	74.24	-	-	-	-	-	-	0	0	0	0	3.93	0	0	0	0.02	0.03	0.49	1.83	2.31	0	2.75	0
TRINITY_DN10986_c0_g2	317	118	-	-	-	-	-	-	3.05	0.87	1.35	9.54	0	0	1.44	1.93	0.47	0.74	0	0	0	0.57	0	0
TRINITY_DN10986_c0_g3	214	30.23	-	-	-	-	-	-	0	0	1.49	0	0	2.46	0	0	0	0	0	20.79	2.25	0.09	0.56	0
TRINITY_DN10987_c0_g1	2112	1913	-	-	-	-	-	-	2.26	0.25	0.14	0	0	0.47	0.4	0.32	1.9	0.42	0.45	0	1.83	0.47	0.25	0.01
TRINITY_DN10988_c0_g1	365	166	-	-	-	-	-	-	0	0.62	0.22	2.19	3.33	0.11	0	2.97	0	0	1.1	0	0	0	0.82	0
TRINITY_DN10988_c1_g1	524	325	-	-	-	-	-	-	0	0.25	0	0	0.35	0.11	0.33	3.15	0	0.11	0.11	0	0.06	0.21	0.31	0
TRINITY_DN10989_c0_g1	1094	895	-	-	GO:0005886(plasma membrane);GO:0048032(galacturonate binding);GO:0007267(cell-cell signaling);GO:0006810(transport)	-	-	-	26.59	3.83	8.88	62.8	59.5	2.72	0.93	74.39	40.29	5.59	0.8	56.99	27.01	9.84	0.93	79.58
TRINITY_DN1098_c0_g1	240	47.71	RPPL1	-	GO:0005524(ATP binding);GO:0005515(protein binding);GO:0006915(apoptosis);GO:0006952(defense response)	[T] Signal transduction mechanisms	-	-	0.44	1.73	1.17	0	0	0.39	0	0	0	0	3.45	0	0.77	0	0	0
TRINITY_DN1098_c1_g1	272	74.24	-	-	-	-	-	-	0.57	1.39	0	0	0	0	0	0	0.25	0.24	0.49	0	1.99	0.23	0	0
TRINITY_DN10990_c0_g1	1198	999	CPRD49	-	GO:0005576(extracellular region);GO:0016788(hydrolase activity, acting on ester bonds);GO:0016042(lipid catabolic process)	[I] Lipid transport and metabolism	-	-	5.68	4.91	10.61	0.38	9.43	5.45	10.26	4.24	7.21	3.26	4.23	0.63	5.61	4.93	9.17	6.36
TRINITY_DN10991_c0_g1	842	643	RPL6	large subunit ribosomal protein L6e	GO:0005840(ribosome);GO:0003735(structural constituent of ribosome);GO:0006412(translation)	[J] Translation, ribosomal structure and biogenesis	K02934	ko03010(Ribosome)	0	0.39	0.7	0	1.95	1.44	0	0	0	0	0	0.42	0	0	0	2.36
TRINITY_DN10991_c0_g2	843	644	RPL6	large subunit ribosomal protein L6e	GO:0005840(ribosome);GO:0003735(structural constituent of ribosome);GO:0006412(translation)	[J] Translation, ribosomal structure and biogenesis	K02934	ko03010(Ribosome)	0.63	0.78	0.18	0	0	0.6	0.4	0	0.98	0	0	0	0.41	0.45	0	0
TRINITY_DN10991_c0_g3	842	643	RPL6	large subunit ribosomal protein L6e	GO:0005840(ribosome);GO:0003735(structural constituent of ribosome);GO:0006412(translation)	[J] Translation, ribosomal structure and biogenesis	K02934	ko03010(Ribosome)	8.2	1.56	0.53	4.12	3.96	1.08	3.5	5.83	7.96	2.22	1.68	0.42	7.34	1.8	1.75	2.36
TRINITY_DN10992_c0_g1	728	529	-	-	-	-	-	-	0.91	0.47	0.14	0.16	0.52	0	0.28	0.32	0.57	0.24	0.14	0	0.17	0.16	0.16	3.66
TRINITY_DN10993_c0_g1	562	363	-	-	-	[A] RNA processing and modification	-	-	0	0	0	2.58	0	0	0.35	0	0.43	0	0	0	0	0	0.23	0
TRINITY_DN10993_c0_g2	562	363	-	-	-	[A] RNA processing and modification	-	-	2.37	2.22	0	5.81	5.07	1.18	0.35	6.31	0.87	0.98	1.36	5.01	1.32	2.25	0.47	0
TRINITY_DN10994_c0_g1	246	52.29	-	-	-	-	-	-	0.4	0	0	0	0	0	0	0	0.36	0	0	0	1.06	1	0	0
TRINITY_DN10994_c0_g2	247	53.07	-	-	-	-	-	-	0.4	0	0	7.83	0	0	0	0	0	0.34	0	0	0	0.98	0.64	0
TRINITY_DN10994_c1_g1	226	37.8	-	-	-	-	-	-	1.11	1.09	0	0	8.53	0.49	0	0	1.5	0.47	0	0	0	0.46	0.45	0
TRINITY_DN10995_c0_g1	702	503	At3g02910	-	GO:0016746(transferase activity, transferring acyl groups);GO:0080167(response to karrikin)	[S] Function unknown	-	-	1.97	0.35	0.09	0	3.78	3	0.25	0.3	2.19	1.62	0.31	0	7.38	3.87	0.18	0
TRINITY_DN10996_c0_g1	1865	1666	-	-	-	-	-	-	3.07	0.73	1.58	6.32	2.96	0.83	0.66	8.51	2.88	0.99	1.25	6.26	1.74	1.3	1.46	10.59
TRINITY_DN10997_c0_g1	933	734	NEDP1	-	GO:0019784(NEDD8-specific protease activity);GO:0006508(proteolysis)	[R] General function prediction only	-	-	6.99	2.92	6.4	8.64	4.8	2.71	5.16	5.98	6.03	2.55	1.64	9.35	6.36	2.68	2.85	3.61
TRINITY_DN10998_c0_g1	210	27.9	POB1	-	-	-	-	-	0	0.33	0	0	6.86	0	0	0	0	0	0	10.46	5.27	1.19	0	0
TRINITY_DN10998_c0_g2	259	62.86	POB1	-	-	-	-	-	6.35	1.49	0	4.96	2.81	2.94	1.69	2.41	2.1	2.55	3.78	0	7.05	0.58	3.25	0
TRINITY_DN10999_c0_g1	273	75.15	-	-	-	-	-	-	0.3	0	0	0	1.84	0	0	3.5	0	0.24	0	0	1.23	0.46	0	0
TRINITY_DN10999_c0_g2	344	145	-	-	-	-	-	-	0.28	0	0.26	0	0	0.26	0	0.14	0.78	0	0	9.59	0	0	0	0
TRINITY_DN1099_c0_g1	211	28.47	-	-	-	-	-	-	6.64	2.17	1.96	0	8.09	1.31	0	0	0	0	0	0	0.65	1.83	0	0
TRINITY_DN1099_c0_g2	211	28.47	-	-	-	-	-	-	0	1.45	0	0	0	1.31	0	0	1.32	0	0	0	1.3	1.22	1.2	0
TRINITY_DN109_c0_g1	425	226	At3g58140	phenylalanyl-tRNA synthetase alpha chain	GO:0009570(chloroplast stroma);GO:0016020(membrane);GO:0005759(mitochondrial matrix);GO:0005524(ATP binding);GO:0000287(magnesium ion binding);GO:0004826(phenylalanine-tRNA ligase activity);GO:0000049(tRNA binding);GO:0006432(phenylalanyl-tRNA aminoacylation);GO:0008033(tRNA processing)	[J] Translation, ribosomal structure and biogenesis	K01889	ko00970(Aminoacyl-tRNA biosynthesis)	2.05	0.09	0.49	0.84	1.02	0.49	0	0	1	1.5	0.32	0	0.82	0.46	0.08	0
TRINITY_DN11000_c0_g1	270	72.44	-	-	-	-	-	-	1.16	0.28	10.48	0.24	0	1.28	2.06	0	0	0	0.76	0	0	0	1.18	0.29
TRINITY_DN11000_c0_g2	271	73.34	-	-	-	-	-	-	2.87	4.5	0.53	0.71	0.31	0.51	0.87	0.31	0	18.97	0.75	1.53	0.25	231.38	5.34	0.29
TRINITY_DN11001_c0_g1	361	162	-	-	-	-	-	-	15.48	7.51	5.66	15.07	15.88	4.82	8.62	23.84	14.37	7.09	5.57	15.51	8.65	8.31	9.04	33.52
TRINITY_DN11001_c0_g2	277	78.81	-	-	-	-	-	-	16.19	4.45	9.33	13.42	7.73	5.42	6.85	14.65	5.61	8.46	3.16	18.23	5.62	10.73	3.24	21.37
TRINITY_DN11002_c0_g1	633	434	-	-	-	-	-	-	0.34	2	0.04	1	0.64	1.28	0.34	0.48	0.39	0.78	0.8	0	0	0.84	0.24	0
TRINITY_DN11004_c0_g1	519	320	-	-	-	-	-	-	1.71	0	0.58	0	0.86	0.29	0.53	0	1.61	0.22	0.26	0	2.07	0.11	0.05	0
TRINITY_DN11004_c0_g2	519	320	-	-	-	-	-	-	0	0.26	0	0	0	0	0	2.25	0.69	0	0.09	0	0	0.11	0	0
TRINITY_DN11005_c0_g1	234	43.32	-	-	-	-	-	-	0	1.43	0.86	0	4.78	0	0	0	0.57	0.41	0	0	0	0.4	0	0
TRINITY_DN11005_c0_g2	246	52.29	-	-	-	-	-	-	0.8	0	0	0	0	0	0.41	0	1.33	0.34	0	0	0	0	0	0
TRINITY_DN11006_c0_g1	449	250	-	-	-	-	-	-	2.02	1.16	1.93	0.55	2.39	0.59	1.53	1.21	1.06	0.64	0.44	0	1.33	0.21	0.82	0
TRINITY_DN11007_c0_g1	326	127	-	pyrophosphate--fructose-6-phosphate 1-phosphotransferase	-	-	K00895	ko00051(Fructose and mannose metabolism)	2.32	1.46	0	1.64	0	0.88	0.34	0	6.23	0.84	1.44	0	2.61	2.19	0.27	0
TRINITY_DN11008_c0_g1	206	25.67	-	-	-	-	-	-	3.27	0	0	0	8.07	0	0	0	7.34	0	0	0	1.44	2.03	0	0
TRINITY_DN11008_c1_g1	211	28.47	-	-	-	-	-	-	1.48	0	0	0	0.81	1.31	0	0	4.63	0	0	0	0	0.61	0	0
TRINITY_DN11009_c0_g1	961	762	-	-	-	-	-	-	37.4	0	2.02	0	0	16.66	9.52	8.81	69.41	1.15	0.29	18.52	91.1	7.4	6.51	26.58
TRINITY_DN11009_c0_g2	961	762	-	-	-	-	-	-	0	2.88	0.49	0	48.13	0	0.28	0	0	0	5.07	0	0	0	0	0
TRINITY_DN11009_c0_g3	961	762	-	-	-	-	-	-	42.71	12.17	14.74	32.14	49.55	0	10.25	15.27	67.37	16.29	5.1	11.96	0	8.54	7.48	17.98
TRINITY_DN1100_c0_g1	228	39.14	-	-	-	-	-	-	0	0.68	0	0	0	0	0	3.87	0.48	0	0	0	0	0	0	0
TRINITY_DN1100_c0_g2	367	168	-	-	-	-	-	-	0.13	0.58	0.44	0	0	0.11	0	0.9	0	0.42	0	0	0	0.21	0	0
TRINITY_DN11010_c0_g1	371	172	-	-	-	-	-	-	2.69	1.68	1.94	5.34	0.13	1.3	2.97	0.88	2.96	1.24	0.74	0	2.36	0.91	0.2	15.42
TRINITY_DN11011_c0_g1	846	647	-	-	-	-	-	-	4.71	0.57	1.66	4.9	2.03	1.24	0.43	3.13	6.09	0.17	0.11	0	1.82	0.81	0.26	3.84
TRINITY_DN11012_c0_g1	223	35.82	-	-	-	-	-	-	8.21	2.3	0.52	1.45	1.29	1.04	2.97	0	8.42	0.5	1.02	0	6.18	0	0	0
TRINITY_DN11013_c0_g1	220	33.9	-	-	-	-	-	-	0	0	0	12.26	0	0	0	0	0	0	0	35.08	0	0	0	0
TRINITY_DN11014_c0_g1	407	208	At2g32630	-	GO:0005488(binding)	[R] General function prediction only	-	-	0.61	0.05	0.27	0	0.59	0	0.1	0	0.54	0.26	0	0	0	0	0	0
TRINITY_DN11014_c0_g2	407	208	At2g32630	-	GO:0005488(binding)	[R] General function prediction only	-	-	0	0.05	0	1.17	0.74	0	0	1.27	0.54	0.51	0.18	0	0	0.5	0	0
TRINITY_DN11015_c0_g1	338	139	RPPL1	-	GO:0005524(ATP binding);GO:0005515(protein binding);GO:0006915(apoptosis);GO:0006952(defense response)	[T] Signal transduction mechanisms	-	-	1.56	0.74	0	0	0.5	1.21	0	2.45	3.12	0.35	0.39	0	0.8	0.38	0.12	0
TRINITY_DN11016_c0_g1	497	298	-	-	-	-	-	-	0.97	0	0	0	0	0.12	0	1.02	1.11	0.21	0.06	0	0	0.47	0.06	0
TRINITY_DN11016_c0_g2	497	298	-	-	-	-	-	-	0.16	0	0	0	0	0.12	0	0	0.28	0.21	0.06	0	0	0	0.06	0
TRINITY_DN11016_c1_g1	301	102	-	-	-	-	-	-	1.24	0	0	0	2.71	0	0	0	2.4	2.1	0.36	0	2.17	0	0.67	0
TRINITY_DN11018_c0_g1	678	479	-	farnesyl-diphosphate farnesyltransferase	-	-	K00801	ko00100(Steroid biosynthesis)	2.37	1.64	1.09	0.9	2.16	3.18	0.49	2.13	1.5	2.94	0.23	0	4.23	1.45	0.28	0
TRINITY_DN1101_c0_g1	227	38.47	-	-	-	-	-	-	0	0.54	0	0	1.8	0.97	0	2.95	0	1.39	0.48	0	0	0	0.44	0
TRINITY_DN11020_c0_g1	407	208	-	-	-	-	-	-	0.2	0.1	0	1.83	0.89	0	0.2	0.06	0.36	0.34	0	4.21	0	0.73	0.08	0
TRINITY_DN11020_c0_g2	322	123	-	-	-	-	-	-	0	0	0	0	0	0.15	0	1.13	0	0	0	0	0.9	0.17	0	0
TRINITY_DN11021_c0_g1	530	331	-	-	-	-	-	-	0	0	0.28	0.75	0	0	0.26	1.09	0	0.22	0	0	0	0	0.1	8.52
TRINITY_DN11021_c0_g2	594	395	-	-	-	-	-	-	0	0.31	0	0.86	0.12	0.47	0	0	0	0	0.28	5.06	0	0.09	0	0
TRINITY_DN11022_c0_g1	466	267	-	-	-	-	-	-	0.13	0.46	0.07	0	0	0.07	0.04	0.43	0	0.33	0.07	0	0	0	0.26	0
TRINITY_DN11022_c0_g2	466	267	-	-	-	-	-	-	0.26	0	0.07	0	0	0	0.04	0.43	0.42	0	0	0	1.45	0.13	0	0
TRINITY_DN11024_c0_g1	243	49.97	-	-	-	-	-	-	0	0	0	0	0.92	0.74	0	4.55	0.75	0.71	1.46	0	1.48	0	0	0
TRINITY_DN11025_c0_g1	680	481	-	-	-	[R] General function prediction only	-	-	0	0	0.5	0	2.15	0	0	0	2.27	0.07	0.08	0	0	0	0	0
TRINITY_DN11026_c0_g1	280	81.6	-	-	-	-	-	-	0	0	1.42	5.52	0	0.43	1.56	0	0	0	0.9	0	0	0.85	0.63	1.03
TRINITY_DN11026_c0_g2	291	92.11	-	-	-	-	-	-	0	0.67	2.98	0	0	2.85	0	0	0	0.58	0	0	0	0	0	0
TRINITY_DN11027_c0_g1	594	395	-	-	-	-	-	-	0.9	0.16	0.66	1.71	1.22	0.09	0.27	0.91	0.76	0.27	0.42	3.41	0.56	0.18	0.04	0
TRINITY_DN11028_c0_g1	885	679.35	-	-	-	-	-	-	18.4	5.07	3.3	5.27	17.59	11.11	4.4	9.05	14.59	6.96	1.87	4.82	27.74	12.69	5.32	0
TRINITY_DN11029_c0_g1	470	271	-	-	-	-	-	-	0.93	1.14	0	2.3	1.19	0.69	0.16	3.07	2.43	0.07	0	0	1.16	0.58	0.13	0
TRINITY_DN1102_c0_g1	583	384	-	-	-	-	-	-	0.88	0.32	0	3.07	0.18	0.05	1.22	2.96	1.23	0.28	0.48	0	0.67	0.54	0.62	0
TRINITY_DN11030_c0_g1	202	23.55	-	-	-	-	-	-	0	0	0	0	9.78	0	0	0	0	2.27	0	13.34	0	0	0	0
TRINITY_DN11031_c0_g1	485	286	-	-	-	-	-	-	0.15	0	0	0	0.97	0.18	0	0	1.32	0.12	0	0	0.74	0	0	0
TRINITY_DN11031_c0_g2	312	113	-	-	-	-	-	-	0	0	0	0	0	0.54	0	0	0	0	0	0	3.03	0	0	0
TRINITY_DN11032_c0_g1	444	245	-	-	-	-	-	-	0	0	0	3.61	0	0	0	0	0	0	0	0	0	0	0	0
TRINITY_DN11032_c0_g2	430	231	-	-	-	-	-	-	0	0	0	0	0	0	0.09	3.85	0	0	0	0	0	0	0	0
TRINITY_DN11033_c0_g1	991	792	-	-	-	-	-	-	11.65	1.61	2.11	0.92	11.39	1.48	2.23	2.2	17.59	1.51	1.27	0	5.05	2.24	1.81	3.08
TRINITY_DN11034_c0_g1	639	440	-	-	-	-	-	-	0.43	0.42	0.08	0.55	0.58	0.59	0.48	2.28	1.46	0.36	0.21	0.41	0.54	0.08	0.35	0
TRINITY_DN11035_c0_g1	447	248	-	-	-	[O] Posttranslational modification, protein turnover, chaperones	-	-	3.56	1.75	1.65	2.03	3.71	0.67	1.29	13.89	3.04	2.3	0.59	1.99	0.37	1.68	1.1	0.08
TRINITY_DN11036_c0_g1	430	231	-	-	-	-	-	-	1.27	0.54	0.4	3.22	0.7	0	0	0	2.04	0.31	0.16	0	0.16	0.08	0	0
TRINITY_DN11036_c1_g1	646	447	-	-	-	-	-	-	1.32	0.09	0.37	0	1.08	0.25	0.33	0.34	2.11	0.24	0.08	0	1.9	0.35	0.23	0
TRINITY_DN11037_c0_g1	202	23.55	-	-	-	-	-	-	6.25	0	0	22.07	0	5.53	0	0	4.8	0.76	0	0	0	1.48	1.45	0
TRINITY_DN11038_c0_g1	213	29.64	-	-	-	-	-	-	0	0	3.76	0	0	1.25	1.44	0	1.91	0	1.23	18.93	0	0	0	0
TRINITY_DN11039_c0_g1	3115	2916	AHK4	-	GO:0016021(integral to membrane);GO:0005886(plasma membrane);GO:0005524(ATP binding);GO:0019955(cytokine binding);GO:0005034(osmosensor activity);GO:0004721(phosphoprotein phosphatase activity);GO:0043424(protein histidine kinase binding);GO:0009885(transmembrane histidine kinase cytokinin receptor activity);GO:0000156(two-component response regulator activity);GO:0000155(two-component sensor act…	[T] Signal transduction mechanisms	-	-	1.58	0.14	0.04	0.5	2.03	0.31	0.47	0.55	1.5	0.19	0.03	0.34	1.21	0.07	0.26	0.51
TRINITY_DN1103_c0_g1	255	59.52	-	-	-	-	-	-	1.41	0.35	0	0	3.87	0.31	0	0	1.9	0.6	0.31	0	1.24	0.58	0	0
TRINITY_DN1103_c1_g1	274	76.06	-	-	-	-	-	-	0.83	0.27	0.98	0	1.51	0	0	0	1.24	0.7	0.24	0	0.24	0.69	0.9	0
TRINITY_DN11040_c0_g1	363	164	-	-	-	-	-	-	0.06	0	0	0	0.98	0	0	0.69	0	0.05	0.17	3.28	0	0.27	0	0
TRINITY_DN11040_c0_g2	363	164	-	-	-	-	-	-	0.06	0	0	5.07	0.98	0	0	0.69	0	0.05	0.17	0	0	0.27	0	0
TRINITY_DN11041_c0_g1	296	97.02	-	-	-	-	-	-	0	0	0.38	2.68	0	0	0	0	1.1	2.37	0	0	0	0	0	0
TRINITY_DN11041_c0_g2	299	100	-	-	-	-	-	-	2.52	2.68	0.56	0	0	0	1.06	2.84	1.4	0.73	0.73	0	0.54	1.57	0	0
TRINITY_DN11041_c0_g3	302	103	-	-	-	-	-	-	0	0	0	0	0	1.8	0	0	1.27	0	0	0	0.55	0	0.83	0
TRINITY_DN11042_c0_g1	1257	1058	BRL1	-	GO:0016021(integral to membrane);GO:0005886(plasma membrane);GO:0005524(ATP binding);GO:0005515(protein binding);GO:0004674(protein serine/threonine kinase activity);GO:0004872(receptor activity);GO:0005496(steroid binding)	-	K00924	-	0.24	0.31	0	1.83	0	0	0.11	0	0	0.1	0.1	0	0	0.31	0.56	0
TRINITY_DN11042_c0_g2	1083	884	BRL1	-	GO:0016021(integral to membrane);GO:0005886(plasma membrane);GO:0005524(ATP binding);GO:0005515(protein binding);GO:0004674(protein serine/threonine kinase activity);GO:0004872(receptor activity);GO:0005496(steroid binding)	-	K00924	-	0	0	0.11	0	1.25	0.36	0.27	0	0.32	0	0.07	0	0.06	0.2	0.13	0
TRINITY_DN11042_c1_g1	253	57.88	BRL1	-	GO:0016021(integral to membrane);GO:0005886(plasma membrane);GO:0005524(ATP binding);GO:0005515(protein binding);GO:0004674(protein serine/threonine kinase activity);GO:0004872(receptor activity);GO:0005496(steroid binding)	-	K00924	-	1.45	0	0	0	0.8	0.64	0.37	0	0.65	0.31	0	0	1.27	1.5	1.77	0
TRINITY_DN11043_c0_g1	505	306	PSBT	-	GO:0009535(chloroplast thylakoid membrane);GO:0009523(photosystem II);GO:0015979(photosynthesis)	-	-	-	140.38	6.04	6.01	1.81	104.69	5.4	0.28	2.85	84.01	9.37	0.6	11.73	22.01	1.27	0.11	0.55
TRINITY_DN11044_c0_g1	230	40.51	-	-	-	-	-	-	0	1.02	0	0	0	0	0	0	0	0.88	0	9.97	0	0.43	0	0
TRINITY_DN11045_c0_g1	655	456	-	-	-	-	-	-	1.84	0.23	0	1.44	0.15	0.06	0.33	0	0	0.23	0.32	1.03	0	0.11	0.22	0
TRINITY_DN11045_c0_g2	655	456	-	-	-	-	-	-	0	0	0	0	0.15	0.76	0	0	0	0	0	1.03	0.61	0.11	0	0
TRINITY_DN11046_c0_g1	732	533	-	-	-	-	-	-	5.6	0.62	0.14	1.04	9.68	2.02	0.28	0.07	10.4	0.6	0	0	12.49	2.42	0.35	0
TRINITY_DN11047_c0_g1	611	412	-	-	-	-	-	-	1.33	0.35	0	0	1.06	0.59	0.31	0	1.74	0.39	0.31	0	1.03	0.84	0.08	0
TRINITY_DN11048_c0_g1	1390	1191	-	-	-	-	-	-	0	0	0	0	0.01	0	0.38	0.75	1.11	0	0	0	0	0	0.03	0
TRINITY_DN11048_c0_g2	1389	1190	-	-	-	-	-	-	1.22	0.35	0.12	0.17	0.54	0.16	0	0.32	1	0.4	0.03	0	0.85	0.47	0	0
TRINITY_DN11049_c0_g1	758	559	-	-	-	-	-	-	0	0	0	0	0	0	0	0	0	0	0	0	0.88	0	0	0
TRINITY_DN11049_c0_g2	760	561	-	-	-	-	-	-	1.84	1.29	0.5	1.67	1.19	1.06	0.64	2.06	1.18	0.98	0.52	0	1.39	0.78	0.42	4.43
TRINITY_DN1104_c0_g1	209	27.33	UBC28	ubiquitin-conjugating enzyme E2 D/E	GO:0005886(plasma membrane);GO:0005524(ATP binding);GO:0004842(ubiquitin-protein ligase activity);GO:0006511(ubiquitin-dependent protein catabolic process)	[O] Posttranslational modification, protein turnover, chaperones	K06689	ko04120(Ubiquitin mediated proteolysis)	466.31	224.28	149.79	52.44	256.31	219.85	71.84	14.2	249.22	242.64	71.56	0	353.89	165.73	64.73	0
TRINITY_DN1104_c0_g2	427	228	UBC28	ubiquitin-conjugating enzyme E2 D/E	GO:0005886(plasma membrane);GO:0005524(ATP binding);GO:0004842(ubiquitin-protein ligase activity);GO:0006511(ubiquitin-dependent protein catabolic process)	[O] Posttranslational modification, protein turnover, chaperones	K06689	ko04120(Ubiquitin mediated proteolysis)	76.13	27.8	28.5	18.2	32.56	32.91	36.57	12.67	51.33	32.72	17.03	5.44	26.94	28.34	24.46	5.18
TRINITY_DN11050_c0_g1	660	461	-	-	-	-	-	-	1.23	1.43	0.85	4.58	1.55	0.6	0.46	3.86	2.21	0.73	0.24	1.56	0.2	1.13	1.11	0
TRINITY_DN11051_c0_g1	393	194	-	-	-	-	-	-	0	0	0	3.39	0	0.1	0	0	0	0	0.57	10.42	0	0	0	0.11
TRINITY_DN11051_c0_g2	528	329	-	-	-	-	-	-	0	0	0	0	0	0	0	4.03	0	0	0	2.17	0	0	0.21	0
TRINITY_DN11052_c0_g1	249	54.65	-	-	-	-	-	-	0.38	0	0	0	3.37	0.34	0	0	0	0	0.33	0	0	0.32	0	0
TRINITY_DN11052_c0_g2	402	173.29	-	-	-	-	-	-	0.93	0	0	0	0.45	0.27	0	0.37	1.85	0.12	0.27	0	2.04	0.12	0	0
TRINITY_DN11053_c0_g1	230	40.51	-	-	-	-	-	-	0	0	0	3.85	0	0	0	0	0	0	0	0	0	0	0	0
TRINITY_DN11054_c0_g1	748	549	-	-	-	-	-	-	1.03	0.87	0	0	0	1.22	0	0	1.79	0.78	0	0	0	0.06	0.09	0
TRINITY_DN11054_c0_g2	270	72.44	-	-	-	-	-	-	0	0.23	0	0	0	1.51	1.76	0	0	0.7	0	0	0	0	0	0
TRINITY_DN11054_c1_g1	617	418	-	-	-	-	-	-	0.1	0.15	0.09	0.7	0	0.8	0	0	0.45	0.43	0	0	0.18	0	0.24	0
TRINITY_DN11055_c0_g1	292	93.08	-	-	-	-	-	-	0.68	1.33	0.4	0	3.96	1	0	0.81	0.61	0.19	0.2	0	2.97	0.75	0.18	0
TRINITY_DN11056_c0_g1	229	39.82	-	-	-	-	-	-	0	0	0	0.87	0	0.93	0	4.75	0	0	0	0	0	0	0	0
TRINITY_DN11058_c0_g1	487	288	-	-	-	-	-	-	0.36	0.14	0.45	0.96	0	0.52	0.37	3.29	0.98	0.19	0.06	0	0.26	0.3	0.24	0
TRINITY_DN11058_c1_g1	447	248	-	-	-	-	-	-	0.08	0.5	1.12	2.37	0.93	0.45	0.09	3.13	0.3	0	0	3.44	0	0.21	0.34	0
TRINITY_DN1105_c0_g1	398	199	-	-	-	-	-	-	3.38	0.41	1.59	2.01	3.7	0.56	0.11	0	2.46	1.07	0	9.36	5.56	0.17	0	7.62
TRINITY_DN1105_c0_g2	331	132	-	-	-	-	-	-	0	0	0	0.12	0	0	0	0	0	0	0.83	0	0.69	0	0	0
TRINITY_DN11060_c0_g1	606	407	RBOHD	-	GO:0016021(integral to membrane);GO:0005886(plasma membrane);GO:0005509(calcium ion binding);GO:0009055(electron carrier activity);GO:0050660(flavin adenine dinucleotide binding);GO:0005506(iron ion binding);GO:0016174(NAD(P)H oxidase activity);GO:0004601(peroxidase activity);GO:0050832(defense response to fungus);GO:0043069(negative regulation of programmed cell death);GO:0072593(reactive oxygen…	[P] Inorganic ion transport and metabolism ;[Q] Secondary metabolites biosynthesis, transport and catabolism	-	-	0	0	0	5.4	0	0	0	5.44	0.28	0	0	0	0	0.09	0.04	0
TRINITY_DN11061_c0_g1	610	411	-	-	-	-	-	-	0.39	0.6	0.64	0	0	0.64	0.44	0	0.05	0.59	0.62	0	1.03	0	0	0
TRINITY_DN11061_c0_g2	558	359	-	-	-	-	-	-	0.78	0	0.09	0	0.38	0.82	0.45	1.58	0.1	0.27	0	0	0	0.97	0.28	0
TRINITY_DN11062_c0_g1	313	114	TKPR1	-	-	[V] Defense mechanisms	-	-	0.37	0.54	2.44	1.82	0	0.49	0	0	0.99	0.31	0.32	0	1.13	0.15	0	0
TRINITY_DN11062_c1_g1	270	72.44	TKPR1	anthocyanidin reductase	-	[V] Defense mechanisms	K08695	ko00941(Flavonoid biosynthesis)	0	0	3.59	2.87	0	0.26	0.29	0	0	0	0	10.53	0	0.48	0	0
TRINITY_DN11063_c0_g1	1770	1571	At5g15730	-	GO:0016021(integral to membrane);GO:0005886(plasma membrane);GO:0005524(ATP binding);GO:0004674(protein serine/threonine kinase activity)	[T] Signal transduction mechanisms	K00924	-	17.94	12.76	22.08	20.68	26.25	13.74	21.19	27.73	11.67	15.48	12.61	20.7	15.84	12.71	18.18	19.69
TRINITY_DN11064_c0_g1	298	99	-	-	-	-	-	-	1.49	0	0	0.87	0	0.75	0.86	1.72	0.95	0.54	0.37	0	1.49	0.18	0.52	0
TRINITY_DN11067_c0_g1	247	53.07	-	-	-	-	-	-	0	0	0	0	3.01	2.03	0	0	0	0	0	0	4.86	0	0.64	0
TRINITY_DN11067_c0_g2	214	30.23	-	-	-	-	-	-	0	0	0	0	0	1.51	0.7	0	0	0	0	0	0	0	3.38	0
TRINITY_DN11067_c0_g3	297	98.01	-	-	-	-	-	-	3.22	1.47	0.19	0	7.29	0.71	0	0	0	0.73	0.93	0	0	0.89	0	0
TRINITY_DN11068_c0_g1	251	56.26	-	-	-	-	-	-	4.09	5.5	0.66	0	0	2.97	1.89	4.24	14.12	1.9	0.65	0	13.11	4.02	0.61	0
TRINITY_DN11068_c0_g2	253	57.88	-	-	-	-	-	-	2.93	0	0	0	6.36	0	0	0.45	1.58	0	0	0.78	0	0	0.58	0
TRINITY_DN11068_c1_g1	1111	912	DOF3.4	-	GO:0005634(nucleus);GO:0003677(DNA binding);GO:0005515(protein binding);GO:0008270(zinc ion binding);GO:0042545(cell wall modification);GO:0045787(positive regulation of cell cycle);GO:0045893(positive regulation of transcription, DNA-dependent);GO:0009733(response to auxin stimulus);GO:0009751(response to salicylic acid stimulus);GO:0006351(transcription, DNA-dependent)	-	-	-	0	0	0	0	3.57	0	0	0.69	0	0	0	0.88	0.26	0	0	0
TRINITY_DN11068_c1_g10	1298	1099	DOF3.4	-	GO:0005634(nucleus);GO:0003677(DNA binding);GO:0005515(protein binding);GO:0008270(zinc ion binding);GO:0042545(cell wall modification);GO:0045787(positive regulation of cell cycle);GO:0045893(positive regulation of transcription, DNA-dependent);GO:0009733(response to auxin stimulus);GO:0009751(response to salicylic acid stimulus);GO:0006351(transcription, DNA-dependent)	-	-	-	3.89	0.1	0	0.14	4.86	0.86	0.06	0.95	1.96	0.28	0	0	0.21	0.56	0	0.27
TRINITY_DN11068_c1_g11	1289	1090	DOF3.4	-	GO:0005634(nucleus);GO:0003677(DNA binding);GO:0005515(protein binding);GO:0008270(zinc ion binding);GO:0042545(cell wall modification);GO:0045787(positive regulation of cell cycle);GO:0045893(positive regulation of transcription, DNA-dependent);GO:0009733(response to auxin stimulus);GO:0009751(response to salicylic acid stimulus);GO:0006351(transcription, DNA-dependent)	-	-	-	0.71	0.07	0.05	0	1.77	0.15	0.06	0	0.61	0.45	0	0.24	0.47	0.12	0	3.48
TRINITY_DN11068_c1_g12	1301	1102	DOF3.4	-	GO:0005634(nucleus);GO:0003677(DNA binding);GO:0005515(protein binding);GO:0008270(zinc ion binding);GO:0042545(cell wall modification);GO:0045787(positive regulation of cell cycle);GO:0045893(positive regulation of transcription, DNA-dependent);GO:0009733(response to auxin stimulus);GO:0009751(response to salicylic acid stimulus);GO:0006351(transcription, DNA-dependent)	-	-	-	0.41	0.1	0	0	1.8	0.35	0	0	0.25	0	0	0.19	0.3	0.39	0	0
TRINITY_DN11068_c1_g13	979	780	DOF3.4	-	GO:0005634(nucleus);GO:0003677(DNA binding);GO:0005515(protein binding);GO:0008270(zinc ion binding);GO:0042545(cell wall modification);GO:0045787(positive regulation of cell cycle);GO:0045893(positive regulation of transcription, DNA-dependent);GO:0009733(response to auxin stimulus);GO:0009751(response to salicylic acid stimulus);GO:0006351(transcription, DNA-dependent)	-	-	-	0	0	0	0.02	4	0.17	0	0.06	0.16	0	0	0	1.06	0	0	6.49
TRINITY_DN11068_c1_g14	1302	1103	DOF3.4	-	GO:0005634(nucleus);GO:0003677(DNA binding);GO:0005515(protein binding);GO:0008270(zinc ion binding);GO:0042545(cell wall modification);GO:0045787(positive regulation of cell cycle);GO:0045893(positive regulation of transcription, DNA-dependent);GO:0009733(response to auxin stimulus);GO:0009751(response to salicylic acid stimulus);GO:0006351(transcription, DNA-dependent)	-	-	-	0.12	0	0	0	0.85	0	0	0.14	0	0	0	0	0	0	0	0
TRINITY_DN11068_c1_g15	1291	1092	DOF3.4	-	GO:0005634(nucleus);GO:0003677(DNA binding);GO:0005515(protein binding);GO:0008270(zinc ion binding);GO:0042545(cell wall modification);GO:0045787(positive regulation of cell cycle);GO:0045893(positive regulation of transcription, DNA-dependent);GO:0009733(response to auxin stimulus);GO:0009751(response to salicylic acid stimulus);GO:0006351(transcription, DNA-dependent)	-	-	-	0.37	0	0.05	0.1	0.94	0.23	0	0	0.14	0	0	0	0.25	0	0	0.1
TRINITY_DN11068_c1_g16	1299	1100	DOF3.4	-	GO:0005634(nucleus);GO:0003677(DNA binding);GO:0005515(protein binding);GO:0008270(zinc ion binding);GO:0042545(cell wall modification);GO:0045787(positive regulation of cell cycle);GO:0045893(positive regulation of transcription, DNA-dependent);GO:0009733(response to auxin stimulus);GO:0009751(response to salicylic acid stimulus);GO:0006351(transcription, DNA-dependent)	-	-	-	2.51	0.1	0	0	2.83	0.46	0	0	1.09	0	0	0.12	0.22	0.22	0.09	0
TRINITY_DN11068_c1_g17	1010	811	DOF3.4	-	GO:0005634(nucleus);GO:0003677(DNA binding);GO:0005515(protein binding);GO:0008270(zinc ion binding);GO:0042545(cell wall modification);GO:0045787(positive regulation of cell cycle);GO:0045893(positive regulation of transcription, DNA-dependent);GO:0009733(response to auxin stimulus);GO:0009751(response to salicylic acid stimulus);GO:0006351(transcription, DNA-dependent)	-	-	-	0	0	0.06	2.73	3.26	0	0	0	0.13	0	0	0	0	0	0	0
TRINITY_DN11068_c1_g18	204	24.6	-	-	-	-	-	-	0	0	0	0	0	0	1.73	0	0	0	0	1.82	0	0	0	0
TRINITY_DN11068_c1_g19	1105	906	DOF3.4	-	GO:0005634(nucleus);GO:0003677(DNA binding);GO:0005515(protein binding);GO:0008270(zinc ion binding);GO:0042545(cell wall modification);GO:0045787(positive regulation of cell cycle);GO:0045893(positive regulation of transcription, DNA-dependent);GO:0009733(response to auxin stimulus);GO:0009751(response to salicylic acid stimulus);GO:0006351(transcription, DNA-dependent)	-	-	-	4.8	0	0	0	5.33	7.5	0	0	4.76	1.72	0	0	2.94	0	0.41	0
TRINITY_DN11068_c1_g2	1109	910	DOF3.4	-	GO:0005634(nucleus);GO:0003677(DNA binding);GO:0005515(protein binding);GO:0008270(zinc ion binding);GO:0042545(cell wall modification);GO:0045787(positive regulation of cell cycle);GO:0045893(positive regulation of transcription, DNA-dependent);GO:0009733(response to auxin stimulus);GO:0009751(response to salicylic acid stimulus);GO:0006351(transcription, DNA-dependent)	-	-	-	0	0	0	0	1.23	0	0	0	0.63	0	0	0.37	1.33	1.02	0	0
TRINITY_DN11068_c1_g20	1119	920	DOF3.4	-	GO:0005634(nucleus);GO:0003677(DNA binding);GO:0005515(protein binding);GO:0008270(zinc ion binding);GO:0042545(cell wall modification);GO:0045787(positive regulation of cell cycle);GO:0045893(positive regulation of transcription, DNA-dependent);GO:0009733(response to auxin stimulus);GO:0009751(response to salicylic acid stimulus);GO:0006351(transcription, DNA-dependent)	-	-	-	0	0	0	0	0	0	0	0.26	0	0	0	0	0	0	0	0
TRINITY_DN11068_c1_g21	1297	1098	DOF3.4	transcription initiation factor TFIID subunit D10	GO:0005634(nucleus);GO:0003677(DNA binding);GO:0005515(protein binding);GO:0008270(zinc ion binding);GO:0042545(cell wall modification);GO:0045787(positive regulation of cell cycle);GO:0045893(positive regulation of transcription, DNA-dependent);GO:0009733(response to auxin stimulus);GO:0009751(response to salicylic acid stimulus);GO:0006351(transcription, DNA-dependent)	-	K03126	ko03022(Basal transcription factors)	2.88	0	0	0.17	7.75	0.3	0.13	0.44	1.95	0.66	0	0	1	0.59	0	0.28
TRINITY_DN11068_c1_g22	1115	916	DOF3.4	-	GO:0005634(nucleus);GO:0003677(DNA binding);GO:0005515(protein binding);GO:0008270(zinc ion binding);GO:0042545(cell wall modification);GO:0045787(positive regulation of cell cycle);GO:0045893(positive regulation of transcription, DNA-dependent);GO:0009733(response to auxin stimulus);GO:0009751(response to salicylic acid stimulus);GO:0006351(transcription, DNA-dependent)	-	-	-	1.15	0	0	0	15.49	0	0	3.72	0	0.72	0	2	8.61	3.39	0.4	0
TRINITY_DN11068_c1_g3	1113	914	DOF3.4	-	GO:0005634(nucleus);GO:0003677(DNA binding);GO:0005515(protein binding);GO:0008270(zinc ion binding);GO:0042545(cell wall modification);GO:0045787(positive regulation of cell cycle);GO:0045893(positive regulation of transcription, DNA-dependent);GO:0009733(response to auxin stimulus);GO:0009751(response to salicylic acid stimulus);GO:0006351(transcription, DNA-dependent)	-	-	-	0	0	0	0	10.2	0	0.56	1.36	0	0	0	0.34	0.27	0	0	0
TRINITY_DN11068_c1_g4	1293	1094	DOF3.4	-	GO:0005634(nucleus);GO:0003677(DNA binding);GO:0005515(protein binding);GO:0008270(zinc ion binding);GO:0042545(cell wall modification);GO:0045787(positive regulation of cell cycle);GO:0045893(positive regulation of transcription, DNA-dependent);GO:0009733(response to auxin stimulus);GO:0009751(response to salicylic acid stimulus);GO:0006351(transcription, DNA-dependent)	-	-	-	1.18	0	0	0	10.16	0.07	0	0.41	0.62	0	0	0	1.57	0.28	0.18	0.98
TRINITY_DN11068_c1_g5	1103	904	DOF3.4	-	GO:0005634(nucleus);GO:0003677(DNA binding);GO:0005515(protein binding);GO:0008270(zinc ion binding);GO:0042545(cell wall modification);GO:0045787(positive regulation of cell cycle);GO:0045893(positive regulation of transcription, DNA-dependent);GO:0009733(response to auxin stimulus);GO:0009751(response to salicylic acid stimulus);GO:0006351(transcription, DNA-dependent)	-	-	-	5.39	1.63	1.01	0	1.38	0	0	0	1.3	0	0.49	0	0.44	4.95	0.21	0
TRINITY_DN11068_c1_g6	1117	918	DOF3.4	-	GO:0005634(nucleus);GO:0003677(DNA binding);GO:0005515(protein binding);GO:0008270(zinc ion binding);GO:0042545(cell wall modification);GO:0045787(positive regulation of cell cycle);GO:0045893(positive regulation of transcription, DNA-dependent);GO:0009733(response to auxin stimulus);GO:0009751(response to salicylic acid stimulus);GO:0006351(transcription, DNA-dependent)	-	-	-	0	0	0	0	4.19	0	0	0.52	0	0	0	0	0	0	0	0
TRINITY_DN11068_c1_g7	1300	1101	DOF3.4	-	GO:0005634(nucleus);GO:0003677(DNA binding);GO:0005515(protein binding);GO:0008270(zinc ion binding);GO:0042545(cell wall modification);GO:0045787(positive regulation of cell cycle);GO:0045893(positive regulation of transcription, DNA-dependent);GO:0009733(response to auxin stimulus);GO:0009751(response to salicylic acid stimulus);GO:0006351(transcription, DNA-dependent)	-	-	-	1.18	0.1	0	0	0.93	0.2	0.16	0	0.52	0.1	0	0.27	0.29	0	0.18	0
TRINITY_DN11068_c1_g8	1107	908	DOF3.4	-	GO:0005634(nucleus);GO:0003677(DNA binding);GO:0005515(protein binding);GO:0008270(zinc ion binding);GO:0042545(cell wall modification);GO:0045787(positive regulation of cell cycle);GO:0045893(positive regulation of transcription, DNA-dependent);GO:0009733(response to auxin stimulus);GO:0009751(response to salicylic acid stimulus);GO:0006351(transcription, DNA-dependent)	-	-	-	22.57	0.29	0	0	25.41	5.8	0	0	24.47	5.57	0	0	17.27	0	0.41	0
TRINITY_DN11068_c1_g9	1290	1091	DOF3.4	-	GO:0005634(nucleus);GO:0003677(DNA binding);GO:0005515(protein binding);GO:0008270(zinc ion binding);GO:0042545(cell wall modification);GO:0045787(positive regulation of cell cycle);GO:0045893(positive regulation of transcription, DNA-dependent);GO:0009733(response to auxin stimulus);GO:0009751(response to salicylic acid stimulus);GO:0006351(transcription, DNA-dependent)	-	-	-	2.43	0	0	0.19	3.2	0.43	0	0	0.91	0.44	0	0	0.84	0.2	0	0.91
TRINITY_DN11069_c0_g1	843	644	-	-	-	-	-	-	0	0	0.17	4.78	0	0	0	3.52	0	0	0	0	0	0	0	0
TRINITY_DN11069_c0_g2	386	187	-	-	-	-	-	-	0	0	0	0.23	0	0	0	3.28	0	0	0	0	0	0	0	0.45
TRINITY_DN1106_c0_g1	262	65.42	-	-	-	-	-	-	0	0	0	7.94	0	0.57	0	2.89	0	0	0	0	0	0	0	0
TRINITY_DN1106_c1_g1	231	41.21	-	-	-	-	-	-	0	0.5	0	0	0	0.45	0	8.27	1.83	0	0	0	0	0	0.41	0
TRINITY_DN11070_c0_g1	286	87.28	ABCB9	ATP-binding cassette, subfamily B (MDR/TAP), member 1	GO:0016021(integral to membrane);GO:0005524(ATP binding);GO:0042626(ATPase activity, coupled to transmembrane movement of substances)	[Q] Secondary metabolites biosynthesis, transport and catabolism	K05658	ko02010(ABC transporters)	1.69	0.47	0	0	2.11	0.21	0	0	0.22	0.82	0	0	1.9	0	0.2	0
TRINITY_DN11070_c1_g1	915	716	ABCB9	ATP-binding cassette, subfamily B (MDR/TAP), member 1	GO:0016021(integral to membrane);GO:0005524(ATP binding);GO:0042626(ATPase activity, coupled to transmembrane movement of substances)	[Q] Secondary metabolites biosynthesis, transport and catabolism	K05658	ko02010(ABC transporters)	0.62	0.23	0	0	2.77	0.1	0	0	0.76	0	0	0	0.26	0.1	0	0
TRINITY_DN11072_c0_g1	214	30.23	-	-	-	-	-	-	0	28.37	13.7	7.45	227.67	20.72	0	0	80.33	26.26	2.79	0	242.8	14.1	0	0
TRINITY_DN11072_c0_g2	206	25.67	-	-	-	-	-	-	0	3.56	4.84	0	60.15	3.84	0	0	9.68	1	1.7	0	43.77	3.05	0	0
TRINITY_DN11072_c1_g1	801	602	-	-	-	-	-	-	21.12	6.89	26.43	6.39	24.48	6.82	9.93	2.2	24.45	7.93	6.41	8.27	13.72	9.63	7.47	5.7
TRINITY_DN11073_c0_g1	272	74.24	-	-	-	-	-	-	0.85	0.83	0.5	1.63	1.86	0.75	0.29	7.65	1.52	0.24	0	0	0	0.23	0	0
TRINITY_DN11074_c0_g1	696	497	-	minichromosome maintenance protein 8	-	[L] Replication, recombination and repair	K10737	-	0.97	0.04	0	0.77	2.22	0.22	0.09	1.94	3.07	0	0.15	0	0.7	0.07	0.14	0
TRINITY_DN11075_c0_g1	353	154	-	-	-	-	-	-	0.68	0.4	0.48	0	0	0	0.28	0	0.84	0.46	0	0	0	0	0	0
TRINITY_DN11075_c0_g2	352	153	-	-	-	-	-	-	0	0	0	0	0.6	0.49	0	2.47	0.14	0.47	0.24	0	0.6	0.23	0	0
TRINITY_DN11076_c0_g1	760	561	At4g26100	casein kinase 1	GO:0005737(cytoplasm);GO:0009506(plasmodesma);GO:0005524(ATP binding);GO:0004674(protein serine/threonine kinase activity)	[T] Signal transduction mechanisms	K02218	ko04340(Hedgehog signaling pathway);ko04711(Circadian rhythm - fly)	11.19	1.73	0.43	1.17	5.29	6.54	7.67	5.51	11.79	4.46	6.76	6.75	6.61	4.52	6.54	0
TRINITY_DN11076_c0_g2	1238	1039	At4g26100	casein kinase 1	GO:0005737(cytoplasm);GO:0009506(plasmodesma);GO:0005524(ATP binding);GO:0004674(protein serine/threonine kinase activity)	[T] Signal transduction mechanisms	K02218	ko04340(Hedgehog signaling pathway);ko04711(Circadian rhythm - fly)	17.43	8.36	10.39	6.41	10.09	8.46	8	6.88	18.58	11.02	3.19	5.88	21.32	11.05	7.93	0
TRINITY_DN11077_c0_g1	1590	1382.51	-	-	-	-	-	-	1.79	0.58	0.41	0	0.3	0.27	0.16	0	1.48	0.38	0.36	0.62	0.54	0.48	0.17	0.03
TRINITY_DN11079_c0_g1	205	25.13	-	-	-	-	-	-	0.84	0.82	1.48	0	0	2.22	0.85	2.26	5.25	2.13	0.73	37.5	0	1.38	0	0
TRINITY_DN1107_c0_g1	257	61.18	-	-	-	-	-	-	2.4	0.34	1.82	0	4.14	0	1.39	0	6.47	0	0	0	0	0	0.56	0
TRINITY_DN1107_c0_g2	259	62.86	-	-	-	-	-	-	0.67	0.66	0	0	0	0.3	0	0	1.8	0.57	1.16	0	0.88	0	0	0
TRINITY_DN11080_c0_g1	957	758	-	-	-	-	-	-	0.87	0.22	0.12	0.23	0.86	0.54	0.03	1.85	1.05	0.2	0.13	1.89	0.39	0.84	0.43	0
TRINITY_DN11080_c0_g2	243	49.97	-	-	-	-	-	-	0.33	0	0	0	6.27	1.09	0	9.02	1.08	0.91	0.25	6.42	3.99	0.43	0	0
TRINITY_DN11081_c0_g1	864	665	-	-	-	-	-	-	0.3	0.65	0.25	3.46	0.62	0.04	0.54	1.05	0.2	0.14	0	0	1.28	1.08	0.67	2.22
TRINITY_DN11081_c0_g2	1007	808	-	-	-	-	-	-	0.17	0	0.25	0	0	0.13	0.48	3.38	0	0.53	0.43	5.55	0	0.4	0.48	0
TRINITY_DN11082_c0_g1	452	253	-	-	-	-	-	-	0.25	0	0	0	1	0.09	0	0	0.97	0.35	0	0	1.17	0	0.13	0
TRINITY_DN11082_c0_g2	451	252	-	-	-	-	-	-	0	0	0	1.58	0	0.05	0.34	0.3	0	0	0.15	0	0	0.34	0	0
TRINITY_DN11082_c1_g1	506	307	-	-	-	-	-	-	0.96	0.13	0.36	1.64	0	0.3	0.28	1.17	1.04	0.29	0.42	0.29	1.74	0.28	0.17	0
TRINITY_DN11084_c0_g1	1459	1260	MRS3	mitochondrial carrier protein, MC family	GO:0016021(integral to membrane);GO:0005743(mitochondrial inner membrane);GO:0005381(iron ion transmembrane transporter activity);GO:0048250(mitochondrial iron ion transport);GO:0006397(mRNA processing);GO:0008380(RNA splicing)	[C] Energy production and conversion	K03454	-	10.85	2.2	2.92	0.1	6.64	3.15	1.24	0.42	5.24	2.44	0.34	0	12.91	0.62	0.82	1.46
TRINITY_DN11085_c0_g1	212	29.05	-	-	-	-	-	-	3.62	0	0	0	0	0	0	0	0	0	0	0	0	0.6	0	0
TRINITY_DN11086_c0_g1	233	42.61	Os05g0555600	glutamate synthase (NADPH/NADH)	GO:0051538(3 iron, 4 sulfur cluster binding);GO:0050660(flavin adenine dinucleotide binding);GO:0010181(FMN binding);GO:0016040(glutamate synthase (NADH) activity);GO:0005506(iron ion binding);GO:0006537(glutamate biosynthetic process);GO:0006541(glutamine metabolic process)	[E] Amino acid transport and metabolism	K00264	ko00250(Alanine, aspartate and glutamate metabolism);ko00910(Nitrogen metabolism)	4.93	2.42	0	2.03	0.54	1.31	0	10.66	4.87	0	2.58	0	2.16	2.45	0.8	0
TRINITY_DN11086_c0_g2	463	264	-	glutamate synthase (NADPH/NADH)	GO:0009501(amyloplast);GO:0051538(3 iron, 4 sulfur cluster binding);GO:0050660(flavin adenine dinucleotide binding);GO:0010181(FMN binding);GO:0016040(glutamate synthase (NADH) activity);GO:0005506(iron ion binding);GO:0006537(glutamate biosynthetic process);GO:0006541(glutamine metabolic process)	[E] Amino acid transport and metabolism	K00264	ko00250(Alanine, aspartate and glutamate metabolism);ko00910(Nitrogen metabolism)	1.19	0.39	0	3.87	2.09	1.34	0	11.83	1.5	1.21	0.35	7.82	3.84	0.59	0.84	0
TRINITY_DN11087_c0_g1	685	486	-	-	-	-	-	-	48.89	65.28	46.8	66.41	187.95	66.01	103.55	183.6	56.15	56.63	16.52	123.72	17.14	50.66	139.66	106.17
TRINITY_DN11087_c0_g2	361	162	-	-	-	-	-	-	30.67	21.95	16.59	0	27.62	21.27	22.32	27.72	6.01	18.64	5.6	33.71	0	18.39	38.21	219.13
TRINITY_DN11088_c0_g1	534	335	-	-	-	-	-	-	0.75	1.42	1.44	0.67	1.51	0.11	1.21	1.24	1.01	0.21	0	3.35	1.76	0.88	0.25	0
TRINITY_DN11089_c0_g1	229	39.82	-	-	-	-	-	-	2.28	0.52	1.03	0	9.22	3.56	1.99	9.16	5.21	3.09	5.97	0	4.3	2.31	0.86	28.26
TRINITY_DN11089_c0_g2	228	39.14	-	-	-	-	-	-	40.64	2.11	3.22	9.74	12.09	2.07	7.76	24.05	24.56	3.23	0	36.69	24.83	5.65	3.04	68.58
TRINITY_DN1108_c0_g1	391	192	-	-	-	-	-	-	0	0.11	0.1	2.53	0.48	0	0.15	0	1.57	0	0.38	0.7	0	0	0	0
TRINITY_DN1108_c0_g2	540	341	-	-	-	-	-	-	0.25	0	0	0	0	0.16	0.29	0	0	0.31	0	0.39	0.43	0.1	0.3	0
TRINITY_DN11090_c0_g1	470	271	-	-	-	-	-	-	1.32	0.23	0.21	2.24	1.27	0	0.16	0.49	0.7	0.13	0	0	0.14	0.13	0.31	0
TRINITY_DN11091_c0_g1	307	108	-	-	-	-	-	-	0.39	1.15	0.17	0	0	0.34	0	0	1.4	0	0	0	0	0.16	0	16.37
TRINITY_DN11092_c0_g1	1316	1117	HTH	mandelonitrile lyase	GO:0008812(choline dehydrogenase activity);GO:0050660(flavin adenine dinucleotide binding);GO:0006066(alcohol metabolic process);GO:0007267(cell-cell signaling);GO:0009553(embryo sac development);GO:0010430(fatty acid omega-oxidation)	[R] General function prediction only	K08248	ko00460(Cyanoamino acid metabolism)	1.69	0.57	0.07	0	0.7	0.2	0.02	0	0.83	0.19	0.82	0	0.08	0.03	0.06	0
TRINITY_DN11093_c0_g1	596	397	DEGS1	sphingolipid delta-4 desaturase	GO:0005789(endoplasmic reticulum membrane);GO:0016021(integral to membrane);GO:0016705(oxidoreductase activity, acting on paired donors, with incorporation or reduction of molecular oxygen);GO:0006633(fatty acid biosynthetic process)	[I] Lipid transport and metabolism	K04712	ko00600(Sphingolipid metabolism)	0	0	0	0.05	0	0	0	0	0	0	0	0	0	0.25	0.65	0
TRINITY_DN11093_c0_g10	1220	1021	DEGS1	sphingolipid delta-4 desaturase	GO:0005789(endoplasmic reticulum membrane);GO:0016021(integral to membrane);GO:0016705(oxidoreductase activity, acting on paired donors, with incorporation or reduction of molecular oxygen);GO:0006633(fatty acid biosynthetic process)	[I] Lipid transport and metabolism	K04712	ko00600(Sphingolipid metabolism)	46.65	22.49	57.33	9.37	52.81	13.65	43.26	11.53	53.74	19.56	28.53	7.67	35.33	19.41	20.47	16.05
TRINITY_DN11093_c0_g11	580	381	DEGS1	sphingolipid delta-4 desaturase	GO:0005789(endoplasmic reticulum membrane);GO:0016021(integral to membrane);GO:0016705(oxidoreductase activity, acting on paired donors, with incorporation or reduction of molecular oxygen);GO:0006633(fatty acid biosynthetic process)	[I] Lipid transport and metabolism	K04712	ko00600(Sphingolipid metabolism)	0	0.41	0.45	0.72	0	0.2	0.43	0.48	0.29	0.3	0.19	0	0.13	0	0	0
TRINITY_DN11093_c0_g12	586	387	DEGS1	sphingolipid delta-4 desaturase	GO:0005789(endoplasmic reticulum membrane);GO:0016021(integral to membrane);GO:0016705(oxidoreductase activity, acting on paired donors, with incorporation or reduction of molecular oxygen);GO:0006633(fatty acid biosynthetic process)	[I] Lipid transport and metabolism	K04712	ko00600(Sphingolipid metabolism)	1.5	0.39	0.83	0.18	0.21	0.47	0.85	0.16	1.01	0.47	0.4	0	0.81	0.19	0.7	0
TRINITY_DN11093_c0_g2	594	395	DEGS1	sphingolipid delta-4 desaturase	GO:0005789(endoplasmic reticulum membrane);GO:0016021(integral to membrane);GO:0016705(oxidoreductase activity, acting on paired donors, with incorporation or reduction of molecular oxygen);GO:0006633(fatty acid biosynthetic process)	[I] Lipid transport and metabolism	K04712	ko00600(Sphingolipid metabolism)	0	0	0.2	0	0	0	0	0	0	0	0	0	0	9.04	7.93	0
TRINITY_DN11093_c0_g3	590	391	DEGS1	sphingolipid delta-4 desaturase	GO:0005789(endoplasmic reticulum membrane);GO:0016021(integral to membrane);GO:0016705(oxidoreductase activity, acting on paired donors, with incorporation or reduction of molecular oxygen);GO:0006633(fatty acid biosynthetic process)	[I] Lipid transport and metabolism	K04712	ko00600(Sphingolipid metabolism)	0	6.25	1.22	0	0	0.27	17.38	1.28	0	0	0.39	4.61	0	0.21	6.63	0
TRINITY_DN11093_c0_g4	582	383	DEGS1	sphingolipid delta-4 desaturase	GO:0005789(endoplasmic reticulum membrane);GO:0016021(integral to membrane);GO:0016705(oxidoreductase activity, acting on paired donors, with incorporation or reduction of molecular oxygen);GO:0006633(fatty acid biosynthetic process)	[I] Lipid transport and metabolism	K04712	ko00600(Sphingolipid metabolism)	3.92	3.97	4.59	1.52	0.53	1.2	5.44	0.88	3.97	2.25	4.2	0	3.06	0.17	0	0
TRINITY_DN11093_c0_g5	588	389	DEGS1	sphingolipid delta-4 desaturase	GO:0005789(endoplasmic reticulum membrane);GO:0016021(integral to membrane);GO:0016705(oxidoreductase activity, acting on paired donors, with incorporation or reduction of molecular oxygen);GO:0006633(fatty acid biosynthetic process)	[I] Lipid transport and metabolism	K04712	ko00600(Sphingolipid metabolism)	0	0.91	0.43	0	0.81	0	3.44	0.32	0.29	0	0	0.65	0.09	0	1.3	0
TRINITY_DN11093_c0_g6	584	385	DEGS1	sphingolipid delta-4 desaturase	GO:0005789(endoplasmic reticulum membrane);GO:0016021(integral to membrane);GO:0016705(oxidoreductase activity, acting on paired donors, with incorporation or reduction of molecular oxygen);GO:0006633(fatty acid biosynthetic process)	[I] Lipid transport and metabolism	K04712	ko00600(Sphingolipid metabolism)	28.14	11.92	31.87	10.66	12.61	12.29	22.45	6.44	29.11	14.93	26.2	1.56	24.14	0	0	0
TRINITY_DN11093_c0_g7	663	464	degs1	sphingolipid delta-4 desaturase	GO:0005789(endoplasmic reticulum membrane);GO:0016021(integral to membrane);GO:0016705(oxidoreductase activity, acting on paired donors, with incorporation or reduction of molecular oxygen);GO:0006633(fatty acid biosynthetic process)	[I] Lipid transport and metabolism	K04712	ko00600(Sphingolipid metabolism)	11.65	5.13	0.29	1.95	19.33	4.56	14.63	1.8	0	0	0	0.12	0	6.7	5.18	0
TRINITY_DN11093_c0_g8	553	354	DEGS1	sphingolipid delta-4 desaturase	GO:0005789(endoplasmic reticulum membrane);GO:0016021(integral to membrane);GO:0016705(oxidoreductase activity, acting on paired donors, with incorporation or reduction of molecular oxygen);GO:0006633(fatty acid biosynthetic process)	[I] Lipid transport and metabolism	K04712	ko00600(Sphingolipid metabolism)	0	0	0	0	11.66	6.7	0	0.19	0	0	0.47	0	0.19	4.97	0.19	0.27
TRINITY_DN11093_c0_g9	592	393	DEGS1	sphingolipid delta-4 desaturase	GO:0005789(endoplasmic reticulum membrane);GO:0016021(integral to membrane);GO:0016705(oxidoreductase activity, acting on paired donors, with incorporation or reduction of molecular oxygen);GO:0006633(fatty acid biosynthetic process)	[I] Lipid transport and metabolism	K04712	ko00600(Sphingolipid metabolism)	0	0.44	3.4	0	0	0	0	4.28	0	0	0.38	0.08	0	1.43	2.14	0
TRINITY_DN11094_c0_g1	697	498	-	-	-	-	-	-	30.81	6.46	14.95	8.07	29.54	9.18	19.14	9.09	35.92	7.98	8.52	5.95	24.77	7.76	11.18	12.26
TRINITY_DN11095_c0_g1	260	63.71	-	-	-	-	-	-	0	0	0.29	0	2.89	0	0	0	0.89	0	0	0	0.87	0.55	0	0
TRINITY_DN11095_c0_g2	261	64.57	-	-	-	-	-	-	0	0	0	0	0	0	0	7.62	0	0	0.28	0	0	0	0	0
TRINITY_DN11096_c0_g1	230	40.51	-	-	-	-	-	-	0	2.04	0	17.1	0	4.98	4.9	0.47	0	0	0	0	0.91	4.62	0	0
TRINITY_DN11096_c0_g2	261	64.57	-	-	-	-	-	-	0	0	6.91	0	0	0	0	6.45	0	0	0	0	0	0	0	0
TRINITY_DN11096_c0_g3	261	64.57	-	-	-	-	-	-	9.13	4.15	5.45	0	0	2.02	7.77	0	9.63	7.72	6.8	0	3.43	5.39	7.65	0
TRINITY_DN11097_c0_g1	274	76.06	-	-	-	-	-	-	0	0	0.24	0	0	0	0	7.22	0	1.17	0	18.88	0	0.23	0	23.8
TRINITY_DN11098_c0_g1	300	101	PCMP-H41	-	GO:0005488(binding)	[R] General function prediction only	-	-	0	0	0	0	0	0	0	1.5	2.99	0	0	0	0	0	0.17	0
TRINITY_DN11098_c0_g2	300	101	PCMP-E16	-	GO:0005488(binding)	[R] General function prediction only	-	-	1.04	0	0	4.12	4.1	0	0	0	0	0	0.18	0	1.83	0.69	0.17	0
TRINITY_DN11099_c0_g1	321	122	-	-	-	-	-	-	0.86	0.34	1.83	2.27	0	0	0.35	3.72	2.63	0.15	0.6	0	0	0.14	0	0
TRINITY_DN1109_c0_g1	387	188	At2g01290	ribose 5-phosphate isomerase A	GO:0005737(cytoplasm);GO:0004751(ribose-5-phosphate isomerase activity);GO:0008219(cell death);GO:0009052(pentose-phosphate shunt, non-oxidative branch);GO:0010228(vegetative to reproductive phase transition of meristem)	[G] Carbohydrate transport and metabolism	K01807	ko00030(Pentose phosphate pathway);ko00710(Carbon fixation in photosynthetic organisms)	0	0.53	0.27	2.03	0	0	2.49	2.06	0	0	1.17	6.92	0.59	1.04	0	0
TRINITY_DN1109_c0_g2	386	187	At2g01290	ribose 5-phosphate isomerase A	GO:0005737(cytoplasm);GO:0004751(ribose-5-phosphate isomerase activity);GO:0008219(cell death);GO:0009052(pentose-phosphate shunt, non-oxidative branch);GO:0010228(vegetative to reproductive phase transition of meristem)	[G] Carbohydrate transport and metabolism	K01807	ko00030(Pentose phosphate pathway);ko00710(Carbon fixation in photosynthetic organisms)	0.9	0.13	0.82	0	2.95	0.4	0	4.31	0.5	0.86	0	0	0	0.54	0.36	0
TRINITY_DN110_c0_g1	393	194	-	-	-	-	-	-	1.63	1.28	0	1.43	3.44	0.77	0.66	0	1.55	0.46	0.57	0	2.28	1.17	0.7	0
TRINITY_DN11100_c0_g1	417	218	CLC-C	chloride channel, other eukaryote	GO:0034707(chloride channel complex);GO:0009705(plant-type vacuole membrane);GO:0005247(voltage-gated chloride channel activity)	[P] Inorganic ion transport and metabolism	K05393	-	0.38	0.28	0.34	0	0.73	0.52	1.01	0	0.74	0	0.1	0	0	0.35	0.34	1.54
TRINITY_DN11100_c0_g2	810	611	CLC-C	chloride channel, other eukaryote	GO:0034707(chloride channel complex);GO:0009705(plant-type vacuole membrane);GO:0005247(voltage-gated chloride channel activity)	[P] Inorganic ion transport and metabolism	K05393	-	1.1	0.1	0	0.45	0.91	0.18	0.48	0.25	0.66	0.23	0.14	0	0.36	0.3	0.86	0
TRINITY_DN11102_c0_g1	239	46.96	NDPK2	nucleoside-diphosphate kinase	GO:0009941(chloroplast envelope);GO:0009570(chloroplast stroma);GO:0005634(nucleus);GO:0009579(thylakoid);GO:0005524(ATP binding);GO:0046872(metal ion binding);GO:0004550(nucleoside diphosphate kinase activity);GO:0005515(protein binding);GO:0009734(auxin mediated signaling pathway);GO:0006241(CTP biosynthetic process);GO:0006183(GTP biosynthetic process);GO:0009585(red, far-red light phototransd…	[F] Nucleotide transport and metabolism	K00940	ko00230(Purine metabolism);ko00240(Pyrimidine metabolism)	0	0	0	0	6.86	0.4	0.45	0	7.97	0	0	0	0.35	0	0	0
TRINITY_DN11102_c0_g2	236	44.76	NDPK2	nucleoside-diphosphate kinase	GO:0009941(chloroplast envelope);GO:0009570(chloroplast stroma);GO:0005634(nucleus);GO:0009579(thylakoid);GO:0005524(ATP binding);GO:0046872(metal ion binding);GO:0004550(nucleoside diphosphate kinase activity);GO:0005515(protein binding);GO:0009734(auxin mediated signaling pathway);GO:0006241(CTP biosynthetic process);GO:0006183(GTP biosynthetic process);GO:0009585(red, far-red light phototransd…	[F] Nucleotide transport and metabolism	K00940	ko00230(Purine metabolism);ko00240(Pyrimidine metabolism)	0.53	0	4.83	0	0	0	0	0	1.32	0.4	0.82	0	2.47	0	1.14	0
TRINITY_DN11102_c0_g3	237	45.49	NDPK2	nucleoside-diphosphate kinase	GO:0009941(chloroplast envelope);GO:0009570(chloroplast stroma);GO:0005634(nucleus);GO:0009579(thylakoid);GO:0005524(ATP binding);GO:0046872(metal ion binding);GO:0004550(nucleoside diphosphate kinase activity);GO:0005515(protein binding);GO:0009734(auxin mediated signaling pathway);GO:0006241(CTP biosynthetic process);GO:0006183(GTP biosynthetic process);GO:0009585(red, far-red light phototransd…	[F] Nucleotide transport and metabolism	K00940	ko00230(Purine metabolism);ko00240(Pyrimidine metabolism)	3.64	1.36	2.59	0	0	0	0	0	0	2.35	0.4	0	2.88	2.3	1.12	0
TRINITY_DN11103_c0_g1	456	257	-	-	-	-	-	-	5.24	3.21	1.37	5.46	8.96	3.47	2.78	5.01	6.53	2.5	2.21	4.89	4.59	4.06	4.17	0
TRINITY_DN11104_c0_g1	979	780	-	-	-	-	-	-	1.27	0.26	0.31	0	0.74	0.29	0.19	0.24	2.05	0	0.26	0	0.54	0.47	0.04	0
TRINITY_DN11104_c1_g1	316	117	-	-	-	-	-	-	1.08	0.88	0	0	0.98	0	0.55	2.91	1.13	0.3	0	0	0	0.6	0	0
TRINITY_DN11105_c0_g1	522	323	-	-	-	-	-	-	0.98	0.32	0.17	0	0.57	0.06	0.26	0	0.58	0.44	0.45	0	0.69	0.22	0.21	0
TRINITY_DN11106_c0_g1	646	447	-	-	-	-	-	-	0	0.74	0.08	1.08	0.21	0	1	0.68	0	0	0.33	0	0.91	0	0	0
TRINITY_DN11106_c0_g2	670	471	-	-	-	-	-	-	0	0	0	0	0	0	0	0	0.6	0.42	0	7.67	0.51	0.63	0	0
TRINITY_DN11107_c0_g1	1187	988	IAA17	-	GO:0005634(nucleus);GO:0046983(protein dimerization activity);GO:0009734(auxin mediated signaling pathway);GO:0006355(regulation of transcription, DNA-dependent);GO:0006351(transcription, DNA-dependent)	-	-	-	2.55	0.77	0.24	0	4.01	1.62	0.41	0	2.81	0.88	0.09	0	4.53	2.5	0.36	0
TRINITY_DN11108_c0_g1	254	58.7	-	-	-	-	-	-	0	0	0	0	14.08	0	0	0	0	1.81	0	0	0	0	0	0
TRINITY_DN11108_c0_g2	252	57.06	-	-	-	-	-	-	0	0	0	0	7.3	0.65	0	0	0	0.95	0	0	0	0.61	0	0
TRINITY_DN11109_c0_g1	471	272	-	-	-	-	-	-	0.53	0.08	0	0.64	0	0.46	0.38	0.49	0	0	0.13	0	0	0	0.06	0
TRINITY_DN11109_c0_g2	208	26.77	-	-	-	-	-	-	2.98	1.54	0	0	0	0	0	0	0	0	0	0	0	0	0	0
TRINITY_DN11109_c0_g3	398	199	-	-	-	-	-	-	0.46	0.21	0	0	0	0.59	0.45	0	1.14	0	0	0	0	0.17	0	0
TRINITY_DN11110_c0_g1	204	24.6	-	-	-	-	-	-	1.71	0	0	0	0	0	0	0	8.43	0	0	0	3.75	0	0	0
TRINITY_DN11111_c0_g1	449	250	-	-	-	-	-	-	0.17	0.08	0	2.49	0.37	0.07	0.04	0	1.06	0.11	0	0	0	0	0.14	0
TRINITY_DN11111_c0_g2	449	250	-	-	-	-	-	-	0	0.08	0	0	0	0	0.04	1.67	0	0.11	0.15	0	1.33	0	0	0
TRINITY_DN11112_c0_g1	1503	1304	COL13	-	GO:0005634(nucleus);GO:0008270(zinc ion binding);GO:0006355(regulation of transcription, DNA-dependent)	-	-	-	0.6	0.32	1.45	4.25	0.65	0.38	0.98	3.75	0.62	0.53	0.79	3.08	0.57	0.4	1.31	8.76
TRINITY_DN11113_c0_g1	328	129	IAA16	-	GO:0005634(nucleus);GO:0046983(protein dimerization activity);GO:0009734(auxin mediated signaling pathway);GO:0006355(regulation of transcription, DNA-dependent);GO:0006351(transcription, DNA-dependent)	-	-	-	0	0	0	0	9.82	0	0	0	0	0	0	0	0	0	0	0
TRINITY_DN11115_c0_g1	697	498	-	-	-	-	-	-	1.14	0.5	0	0	1.37	0.61	0.76	0.61	0.68	0.56	0.59	0.63	0.27	0.24	0.15	0
TRINITY_DN11115_c0_g2	698	499	-	-	-	-	-	-	0	0	0	1.53	0.11	0.48	0.07	1.06	0.21	0.19	0	0	0.49	0	0.37	0
TRINITY_DN11115_c0_g3	665	466	-	-	-	-	-	-	0.36	0	0.08	0	0.74	0.27	0.08	0.33	0.5	0	0	0	0.06	0	0	0
TRINITY_DN11116_c0_g1	388	189	FAO2	-	GO:0016021(integral to membrane);GO:0050660(flavin adenine dinucleotide binding);GO:0046577(long-chain-alcohol oxidase activity)	-	-	-	0.89	0	0.2	1.47	0.49	0.3	0	0	3.59	0.19	0	0	0.78	0.18	0	0
TRINITY_DN11117_c0_g1	1084	885	-	phosphoglycerate kinase	GO:0009507(chloroplast);GO:0005524(ATP binding);GO:0004618(phosphoglycerate kinase activity);GO:0006096(glycolysis);GO:0019253(reductive pentose-phosphate cycle)	[G] Carbohydrate transport and metabolism	K00927	ko00010(Glycolysis / Gluconeogenesis);ko00710(Carbon fixation in photosynthetic organisms)	52.51	4.97	3.99	5.92	39.93	11.64	6.73	0	41.38	6.24	4.33	0.14	29.41	6.83	6.02	4.06
TRINITY_DN11117_c0_g2	1084	885	-	phosphoglycerate kinase	GO:0009507(chloroplast);GO:0005524(ATP binding);GO:0004618(phosphoglycerate kinase activity);GO:0006096(glycolysis);GO:0019253(reductive pentose-phosphate cycle)	[G] Carbohydrate transport and metabolism	K00927	ko00010(Glycolysis / Gluconeogenesis);ko00710(Carbon fixation in photosynthetic organisms)	45.65	0	0.13	0	30.23	0.05	0	1.25	13.16	0	0	0.14	0	0	0.21	0.09
TRINITY_DN11117_c0_g3	1084	885	-	phosphoglycerate kinase	GO:0009507(chloroplast);GO:0005524(ATP binding);GO:0004618(phosphoglycerate kinase activity);GO:0006096(glycolysis);GO:0019253(reductive pentose-phosphate cycle)	[G] Carbohydrate transport and metabolism	K00927	ko00010(Glycolysis / Gluconeogenesis);ko00710(Carbon fixation in photosynthetic organisms)	0	5.77	4	11.59	0	0	6.46	6.23	26.4	8.85	5.29	0.14	37.14	6.85	6.89	18.49
TRINITY_DN11118_c0_g1	432	233	-	-	-	[R] General function prediction only	-	-	0.18	0.71	0	0.82	0.4	0	0	3.57	0.32	0	0	0	0.79	0.07	0.37	0
TRINITY_DN11119_c0_g1	408	209	-	-	-	-	-	-	0	0.24	0	0	0	0	0.51	0	0	0	0	0	0	1.47	0	0
TRINITY_DN11119_c0_g2	376	177	-	-	-	-	-	-	0	0.3	0	0	0.39	0.11	0	2.99	0.32	0.2	0	0	0	1.71	0.38	0
TRINITY_DN11119_c1_g1	269	71.55	-	-	-	-	-	-	0.29	0	0	0	0	0.52	0.3	0	0.26	0.5	0	0	0	3.89	0	0
TRINITY_DN1111_c0_g1	296	97.02	-	-	-	-	-	-	0.22	0	0	5.36	0	0.19	0.44	0	1.17	0.55	1.7	0	0	4.13	0.7	0
TRINITY_DN11120_c0_g1	219	33.27	-	-	-	-	-	-	0	0.62	2.23	0	0	0	0	2.84	0	0	0.55	22.93	0	0	2.05	0
TRINITY_DN11120_c1_g1	234	43.32	-	-	-	-	-	-	0	0	0	0	0	0	0	0	0	0	0	19.68	0	0	0	0
TRINITY_DN11121_c0_g1	234	43.32	-	-	-	-	-	-	0.49	0	0	0	0.53	0	1.96	9.61	1.31	0.41	0.84	0	2.55	0.4	0	0
TRINITY_DN11122_c0_g1	317	118	-	-	-	-	-	-	0.71	0	0	1.47	0	0.32	0.36	9.3	0	0	0.16	0	0	0	0.72	0
TRINITY_DN11123_c0_g1	336	137	-	-	-	-	-	-	0.15	0	0.27	0	0	0	0	0	0.55	0.26	0	0	2.02	0.13	0	0
TRINITY_DN11126_c0_g1	262	65.42	XTH7	xyloglucan:xyloglucosyl transferase	GO:0048046(apoplast);GO:0005618(cell wall);GO:0004553(hydrolase activity, hydrolyzing O-glycosyl compounds);GO:0016762(xyloglucan:xyloglucosyl transferase activity);GO:0007047(cellular cell wall organization);GO:0006073(cellular glucan metabolic process)	-	K08235	-	12.53	0	0	0	0	0	0	0	0	0	0	0	0	0	0	0
TRINITY_DN11128_c0_g1	254	58.7	-	-	-	-	-	-	3.22	2.11	0	0	5.1	2.85	2.9	4.52	3.85	1.21	0	0	2.51	1.48	1.16	0
TRINITY_DN1112_c0_g1	379	180	-	-	-	-	-	-	0.9	0	0	0	0.67	0	0	2.21	1.28	0	0	0	0	0	0	0
TRINITY_DN1112_c0_g2	379	180	-	-	-	-	-	-	1.2	0	0.41	0	1.12	0.52	0	0	1.44	0	0	0	0	0.97	0	0
TRINITY_DN11130_c0_g1	501	302	-	-	-	-	-	-	1.67	0.48	0.92	1.38	1.98	0.18	0.28	1.44	2.43	0.53	0.48	4.68	1.47	0.81	1.24	0
TRINITY_DN11131_c0_g1	582	383	-	-	-	-	-	-	4.39	0.92	5.19	8.86	8.42	1.21	2.78	13.84	3.4	1.3	1.05	4.45	2.7	1.32	4.62	21.98
TRINITY_DN11132_c0_g1	302	103	-	-	-	-	-	-	0.82	1.4	1.26	0	3.13	2.89	2.69	10.29	0.91	0.52	0.89	0.22	0	2.03	1.49	0
TRINITY_DN11133_c0_g1	691	492	At2g36090	-	-	-	-	-	0.33	0.2	0.87	2.06	0.43	0.47	0.8	0.18	0.46	0.1	0.26	0	0.8	0.54	0.26	0
TRINITY_DN11133_c1_g1	730	531	At2g36090	-	-	-	-	-	0.06	0.1	0.17	4.03	2.51	0.47	0.5	0.27	0	0.05	0.06	1.42	0.82	0.15	0.46	0
TRINITY_DN11134_c0_g1	330	131	-	-	-	[G] Carbohydrate transport and metabolism	-	-	0.86	0	0	0.04	0	0.51	0	1.3	2.18	0	0.42	0	0	0.18	0	0
TRINITY_DN11134_c0_g2	390	191	-	-	-	[G] Carbohydrate transport and metabolism	-	-	0.84	0	0.39	0.15	2.77	0.43	1.11	0	0.68	0.28	0	0	1.35	1.61	0	0
TRINITY_DN11135_c0_g1	320	121	-	-	-	-	-	-	2.32	1.02	0	0	0	0	0	0	5.7	0.29	0.08	0	1.28	0	0	0
TRINITY_DN11135_c0_g2	320	121	-	-	-	-	-	-	0.46	0	0	0	0.95	0	0.18	2.19	0.38	0	0.08	0	1.46	0	0.28	0
TRINITY_DN11136_c0_g1	335	136	RH42	-	GO:0005524(ATP binding);GO:0008026(ATP-dependent helicase activity);GO:0003723(RNA binding)	[A] RNA processing and modification	-	-	0	0	0	0	0	0	0	0	0	0	0	0.16	2.98	0	0	10.21
TRINITY_DN11137_c0_g1	350	151	-	-	-	-	-	-	1.11	0.14	0	0	0	0.12	0	0	3.37	0.24	0	0	0	0.23	0	0
TRINITY_DN11137_c0_g2	351	152	-	-	-	-	-	-	0	0	0	0	0.5	0	1.58	0	0	0	0	0	3.07	0	0	0
TRINITY_DN11137_c0_g3	352	153	-	-	-	-	-	-	0	0	0	0	5.82	0	0.52	0	0	0	0	0	1.9	0	0	0
TRINITY_DN11138_c0_g1	1077	878	-	-	-	[U] Intracellular trafficking, secretion, and vesicular transport	-	-	13.77	6.67	7.44	2.54	19.38	6.33	7.29	5.35	15.61	6.47	5	3.19	16.61	5.33	4.46	5.27
TRINITY_DN11139_c0_g1	560	361	-	-	-	-	-	-	4.31	2.17	0.83	0.82	2.85	2.01	1.77	1.36	3.46	3.7	0.91	3.36	3.76	1.88	0.66	0
TRINITY_DN11139_c0_g2	292	93.08	-	-	-	-	-	-	0	0	1.78	0	1.05	0	0	2.24	1.15	0	0	0	1.64	0	0	0
TRINITY_DN11140_c0_g1	565	366	-	-	-	-	-	-	1.21	0.34	0.56	0	1.45	0.76	0.64	1.97	0.82	0.49	0.4	5.64	0.45	1.38	0.42	0
TRINITY_DN11141_c0_g1	473	274	-	-	-	-	-	-	0.69	0.38	0.14	0	1.51	0.54	0.31	1.45	1.24	0.39	0.07	0	0.34	0.25	0	0
TRINITY_DN11141_c1_g1	503	304	-	-	-	-	-	-	1.11	1.56	7.94	41.94	4.09	1.9	2.73	132.02	1.43	2.7	0.84	22.88	2.06	0.29	3.42	14.12
TRINITY_DN11141_c2_g1	349	150	-	-	-	-	-	-	3.22	3.3	7.41	15.36	5.53	1.98	4.82	44.44	5.78	2.38	2.93	3.9	3.93	1.51	1.82	0
TRINITY_DN11142_c0_g1	319	120	-	-	-	-	-	-	0.35	0.52	0	0	0	0.77	1.42	3.47	2.98	0	0	0	0.31	0.15	0.43	0
TRINITY_DN11143_c0_g1	235	44.04	-	-	-	[R] General function prediction only	-	-	0.95	1.41	0	0	0	0	0	0	1.28	0	1.66	0	1.67	0	0.77	0
TRINITY_DN11143_c0_g2	245	51.51	-	-	-	-	-	-	0.82	0	0.72	7.4	0	0	0	0	0	0.35	0	0	0	0.34	0	0
TRINITY_DN11143_c1_g1	239	46.96	-	-	-	[R] General function prediction only	-	-	1.34	0	0	8.11	5.88	0	0	0	0	0.76	0.39	0	4.32	0.37	0	0
TRINITY_DN11144_c0_g1	852	653	ARF1	Arf/Sar family, other	GO:0005768(endosome);GO:0005794(Golgi apparatus);GO:0005525(GTP binding);GO:0016004(phospholipase activator activity);GO:0015031(protein transport);GO:0007264(small GTPase mediated signal transduction);GO:0016192(vesicle-mediated transport)	[U] Intracellular trafficking, secretion, and vesicular transport	K07977	-	125.31	80.76	88.2	117.32	143.56	71.75	89.56	149.79	124.71	80.97	65.7	166.09	116.28	77.59	63.19	164.37
TRINITY_DN11145_c0_g1	271	73.34	-	-	-	-	-	-	0	0	0	0	2.2	0	1.45	0	0.51	0	0	0	0	0	0.23	0
TRINITY_DN11146_c0_g1	276	77.89	-	-	-	-	-	-	0	0	0.24	13.79	0	0.48	1.37	18.71	0	0.69	1.41	0	0	0	3.5	0
TRINITY_DN11147_c0_g1	435	236	-	-	-	-	-	-	0.71	0.61	0	0	0	0.47	0.18	1.28	0.16	0.3	0.23	0	0.23	0	0.07	0
TRINITY_DN11148_c0_g1	457	258	-	-	-	-	-	-	13.94	1.6	8.46	25.87	5.35	3.25	11.55	7.04	18.61	1.8	3.54	3.57	18.53	2.77	5.04	29.53
TRINITY_DN11148_c0_g2	475	273.3	-	-	-	-	-	-	11.8	2.98	8.1	10.21	0	2.77	4.75	17.52	5.98	2.78	6.81	28.21	0.22	3.14	2.81	11.5
TRINITY_DN11148_c1_g1	309	110	-	-	-	-	-	-	16.6	5.75	8.26	10.6	0	2.17	4.39	16.57	9.3	2.97	4.37	61.6	0.2	3.77	3.66	13.74
TRINITY_DN11149_c0_g1	392	193	-	-	-	-	-	-	18.41	1.39	13.08	29.89	18.85	5.01	8.38	30.99	31.45	5.45	5.12	2.67	17	5.32	9.09	11.78
TRINITY_DN1114_c0_g1	206	25.67	-	-	-	-	-	-	0	0	0	0	0	0.71	0	0	0	0	0.72	0	8.48	0.68	0	0
TRINITY_DN1114_c0_g2	401	202	-	-	-	-	-	-	0	0.2	0	0	0	0.46	0.21	3.09	0.19	0.09	0.27	0	0.2	0	0	0
TRINITY_DN11150_c0_g1	672	473	-	-	-	-	-	-	1.56	0.74	0	0.07	0.63	0.24	0.09	0.48	0.84	0.68	0.19	0	0.7	0.18	0.25	0
TRINITY_DN11151_c0_g1	349	150	-	-	-	-	-	-	0	1.79	0.25	1.85	0	0.12	0.43	0	0	0.71	0	0	3.07	0.35	0	0
TRINITY_DN11152_c0_g1	1209	1010	D27	-	-	-	-	-	2.64	0.59	0.18	0.03	1.71	0.18	0.13	0.11	0.95	0.32	0.07	0	4.6	0.59	0.03	0
TRINITY_DN11153_c0_g1	700	501	-	-	-	-	-	-	2.77	0.33	0.33	0	2.3	0	0.21	0	4.1	0.18	0.15	0	0.92	0.76	0.41	0
TRINITY_DN11154_c0_g1	327	128	-	-	-	-	-	-	1.19	0	0	0	0	0	1.5	0	0	0	0	0	0	0.39	0.71	1.48
TRINITY_DN11154_c0_g2	294	95.04	-	-	-	-	-	-	3.27	0	2.15	0	0	0	0	5.38	0	0	0.19	0	5.43	0.03	1.73	0
TRINITY_DN11154_c1_g1	246	52.29	-	-	-	-	-	-	3.22	0	0	0	0	0	0.41	1.45	0	0	0	0	4.94	0.67	1.63	0
TRINITY_DN11155_c0_g1	283	84.42	-	-	-	-	-	-	0.5	0.98	0.44	0	0	1.98	0	0	0	1.69	0	0	0	0.62	0	0
TRINITY_DN11156_c0_g1	765	566	-	-	-	-	-	-	0.78	0.58	0.03	0.18	1.95	0.13	0.3	0.27	1.2	0.31	0.16	1.47	0.91	1.63	0.18	0
TRINITY_DN11157_c0_g1	379	134.09	-	aldehyde dehydrogenase (NAD+)	-	-	K00128	ko00010(Glycolysis / Gluconeogenesis);ko00053(Ascorbate and aldarate metabolism);ko00071(Fatty acid metabolism);ko00280(Valine, leucine and isoleucine degradation);ko00310(Lysine degradation);ko00330(Arginine and proline metabolism);ko00340(Histidine metabolism);ko00380(Tryptophan metabolism);ko00410(beta-Alanine metabolism);ko00561(Glycerolipid metabolism);ko00620(Pyruvate metabolism);ko00631(1,…	0.58	4.81	24.23	0.24	0	5.92	22.46	0	1.56	2.02	10.4	0	0.1	6.87	10.12	0
TRINITY_DN11158_c0_g1	384	185	-	-	-	-	-	-	1.82	0	1.81	0	1.12	0.4	0	0	0	0.87	0.2	0	0.5	0.19	0.09	0
TRINITY_DN11158_c1_g1	234	43.32	-	-	-	-	-	-	4.85	0.95	0	0	1.59	0	0	0	0	0.41	0	0	0	0.4	0.39	0
TRINITY_DN11159_c0_g1	391	192	-	-	-	-	-	-	0.99	0.75	0	0	1.2	0.97	0.55	0	1.67	0.19	0.19	0	0.1	1.54	0.09	0
TRINITY_DN11160_c0_g1	571	372	-	-	-	-	-	-	0.51	0.28	1.95	1.54	0.56	0.7	1.14	4.08	1.27	0.14	0.44	0	0.5	0.19	1.05	0
TRINITY_DN11161_c0_g1	259	62.86	-	-	-	-	-	-	0	0	1.18	0	0	0	0	0	0.6	0	0	3.21	0	0	0	0
TRINITY_DN11161_c0_g2	257	61.18	-	-	-	-	-	-	0	0	0	0	0	0.61	0.35	3.4	0	0.58	0	0	0	0	0	0
TRINITY_DN11162_c0_g1	440	241	-	-	-	-	-	-	0.6	0	0.08	0	2.22	0	0	1.73	4.14	0.2	0	0	0	0.14	0	0.17
TRINITY_DN11162_c0_g2	252	57.06	-	-	-	-	-	-	0.03	0.72	0	0	0.72	0	0.75	0	4.31	0.09	0	10.22	0.97	0	0	0
TRINITY_DN11163_c0_g1	806	607	-	-	-	-	-	-	0	0.06	0	0	0	0.12	0	0	0.62	0.32	0	0	0.73	0.03	0	0
TRINITY_DN11163_c0_g2	811	612	-	-	-	-	-	-	0.27	0.41	0.03	0	0.53	0	0	0	0	0	0.33	0	0	0	0.11	0
TRINITY_DN11164_c0_g1	264	67.15	-	-	-	-	-	-	1.25	2.16	2.21	6.19	1.72	3.32	3.17	0.28	5.33	0.98	1.09	0	3.57	1.35	2.79	10.97
TRINITY_DN11165_c0_g1	492	293	GRP2	-	GO:0000166(nucleotide binding);GO:0003723(RNA binding)	[R] General function prediction only	-	-	1.87	0.49	0.82	9.22	1.26	1.33	3.41	23.52	2.57	1.58	0.19	6.59	3.78	0.42	2.32	9.84
TRINITY_DN11166_c0_g1	233	42.61	-	-	-	-	-	-	0	0	0	0	0	0	0	0	0.88	0	0	0	4.31	0.82	0	0
TRINITY_DN11166_c0_g2	201	23.03	-	-	-	-	-	-	2.74	0	0	0	0	0.81	2.77	0	0	0	0	0	3.23	0	0	0
TRINITY_DN11166_c1_g1	249	54.65	-	-	-	-	-	-	2.88	0.06	0	0	0	0	0.39	0	0	0	0.67	0	0	0.85	0	0
TRINITY_DN11166_c1_g2	319	120	-	-	-	-	-	-	0.96	0.32	0	0	1.15	0	0	0	0	0	0	13.46	0	0.48	0.14	0
TRINITY_DN11167_c0_g1	674	475	-	-	-	-	-	-	0.53	0.13	0.08	0	0	0.12	0.18	1.12	0.12	0.41	0.19	4.39	0.47	0.92	0.29	0
TRINITY_DN11169_c0_g1	371	172	PIP5K6	1-phosphatidylinositol-4-phosphate 5-kinase	GO:0016324(apical plasma membrane);GO:0090406(pollen tube);GO:0016308(1-phosphatidylinositol-4-phosphate 5-kinase activity);GO:0005524(ATP binding);GO:0072583(clathrin-mediated endocytosis)	[T] Signal transduction mechanisms	K00889	ko00562(Inositol phosphate metabolism);ko04070(Phosphatidylinositol signaling system);ko04144(Endocytosis);ko04666(Fc gamma R-mediated phagocytosis);ko04810(Regulation of actin cytoskeleton)	0.24	0	0	0	1.74	0.22	0	0	2.3	0.1	0	0	1.07	0.61	0	0
TRINITY_DN11169_c1_g1	312	113	PIP5K6	1-phosphatidylinositol-4-phosphate 5-kinase	GO:0016324(apical plasma membrane);GO:0090406(pollen tube);GO:0016308(1-phosphatidylinositol-4-phosphate 5-kinase activity);GO:0005524(ATP binding);GO:0072583(clathrin-mediated endocytosis)	[T] Signal transduction mechanisms	K00889	ko00562(Inositol phosphate metabolism);ko04070(Phosphatidylinositol signaling system);ko04144(Endocytosis);ko04666(Fc gamma R-mediated phagocytosis);ko04810(Regulation of actin cytoskeleton)	1.12	0	0	0	3.06	0	0	0	1.33	0	0	0	3.92	0.31	0	0
TRINITY_DN1116_c0_g1	358	159	-	cyclopropane-fatty-acyl-phospholipid synthase	-	-	K00574	-	0	0	0	0	0.58	0	0	1.43	0.36	0	0	0	0	0	0	0
TRINITY_DN1116_c0_g2	359	160	-	cyclopropane-fatty-acyl-phospholipid synthase	-	-	K00574	-	0	0	0	5.3	0	0	0	0	0	0	0.23	0	0	0	0	0
TRINITY_DN11170_c0_g1	702	503	RAP2-12	EREBP-like factor	GO:0005634(nucleus);GO:0003677(DNA binding);GO:0003700(sequence-specific DNA binding transcription factor activity);GO:0009873(ethylene mediated signaling pathway)	-	K09286	-	47.48	6.07	9.92	29.12	104.68	20.65	32.96	17.72	226.19	7.81	9.43	25.97	26.57	28.4	23.71	79.22
TRINITY_DN11171_c0_g1	205	25.13	RHM2	UDP-glucose 4,6-dehydratase	GO:0005829(cytosol);GO:0005625(soluble fraction);GO:0050662(coenzyme binding);GO:0008831(dTDP-4-dehydrorhamnose reductase activity);GO:0008460(dTDP-glucose 4,6-dehydratase activity);GO:0010489(UDP-4-keto-6-deoxy-glucose-3,5-epimerase activity);GO:0010490(UDP-4-keto-rhamnose-4-keto-reductase activity);GO:0050377(UDP-glucose 4,6-dehydratase activity);GO:0010280(UDP-L-rhamnose synthase activity);GO:…	[G] Carbohydrate transport and metabolism	K12450	ko00520(Amino sugar and nucleotide sugar metabolism)	2.51	0	0	0	0	1.48	0	0	7.5	0	0	0	37.41	2.08	0	0
TRINITY_DN11171_c1_g1	254	58.7	RHM3	UDP-glucose 4,6-dehydratase	GO:0005829(cytosol);GO:0009506(plasmodesma);GO:0005625(soluble fraction);GO:0050662(coenzyme binding);GO:0008831(dTDP-4-dehydrorhamnose reductase activity);GO:0016829(lyase activity);GO:0010280(UDP-L-rhamnose synthase activity);GO:0045226(extracellular polysaccharide biosynthetic process);GO:0010253(UDP-rhamnose biosynthetic process)	[G] Carbohydrate transport and metabolism	K12450	ko00520(Amino sugar and nucleotide sugar metabolism)	1.07	0	0	0	1.18	0.63	0	0	2.25	0.61	0	0	5.34	0.59	0	0
TRINITY_DN11172_c0_g1	948	749	ATPG	F-type H+-transporting ATPase subunit b	GO:0009535(chloroplast thylakoid membrane);GO:0016021(integral to membrane);GO:0045263(proton-transporting ATP synthase complex, coupling factor F(o));GO:0005524(ATP binding);GO:0015078(hydrogen ion transmembrane transporter activity);GO:0015986(ATP synthesis coupled proton transport)	-	K02109	ko00190(Oxidative phosphorylation);ko00195(Photosynthesis)	29.77	5.34	7.81	21.81	27.82	8.36	9.83	34.9	30.37	8.2	6.69	24.15	31.58	7.69	8.8	47.18
TRINITY_DN11173_c0_g1	297	68.33	-	-	-	-	-	-	0	0.21	1.14	4.34	0	0	0.92	3.28	0	0	0	18.2	0	0.38	2.58	0
TRINITY_DN11174_c0_g1	363	164	-	-	-	-	-	-	1.28	0.88	0	1.9	1.12	0.57	0	0	2.3	0	0	0	1.12	0	0	0
TRINITY_DN11174_c0_g2	352	153	-	-	-	-	-	-	0	0	0.36	0	0	0	1.39	0	0	0	0.24	0	0	0.91	0.45	0
TRINITY_DN11176_c0_g1	381	182	-	-	-	-	-	-	3.58	0.45	5.2	4	4.93	0.31	0	1.98	1.24	0.2	1.61	0	2.84	0.29	0	0
TRINITY_DN11178_c1_g1	207	26.22	-	-	-	-	-	-	1.6	3.93	0	0.66	0	1.42	1.62	0	0.72	4.08	0	36.8	0	0.66	0.65	0
TRINITY_DN11179_c0_g1	257	61.18	CYCT1-3	-	GO:0019901(protein kinase binding);GO:0007049(cell cycle);GO:0051301(cell division);GO:0000079(regulation of cyclin-dependent protein kinase activity);GO:0006355(regulation of transcription, DNA-dependent)	[D] Cell cycle control, cell division, chromosome partitioning	-	-	1.03	0	0.3	0	0	0	0	0	2.46	0	0	0	0	0.57	0.28	0
TRINITY_DN11179_c0_g2	255	59.52	CYCT1-3	-	GO:0019901(protein kinase binding);GO:0007049(cell cycle);GO:0051301(cell division);GO:0000079(regulation of cyclin-dependent protein kinase activity);GO:0006355(regulation of transcription, DNA-dependent)	[D] Cell cycle control, cell division, chromosome partitioning	-	-	1.06	0	0	0	1.55	0.62	0.36	2.86	0.95	0	0	0	0	0	0	0
TRINITY_DN11180_c0_g1	226	37.8	-	-	-	-	-	-	1.67	0	0	13.29	0	1.97	0	0	0	0.94	0	0	0.98	0.46	2.25	0
TRINITY_DN11181_c0_g1	202	23.55	-	-	-	-	-	-	2.68	3.5	0	0	8.8	1.58	0	0	5.6	0	0.78	0	0	5.91	2.17	0
TRINITY_DN11182_c0_g1	925	726	ZMAT2	-	GO:0005634(nucleus);GO:0003677(DNA binding);GO:0008270(zinc ion binding)	[R] General function prediction only	-	-	35.57	8.16	19.49	16.59	45.63	8.13	17.52	23.69	44.01	9.55	8.77	26.96	23.27	9.71	10.68	37.7
TRINITY_DN11182_c0_g2	992	793	ZMAT2	-	GO:0005634(nucleus);GO:0003677(DNA binding);GO:0008270(zinc ion binding)	[R] General function prediction only	-	-	1.66	0.44	1.12	0.89	0.27	0.36	0.94	1.61	0.66	1.03	0.55	1.75	1.41	0.81	0.63	5.51
TRINITY_DN11183_c0_g1	1750	1551	-	-	-	[K] Transcription ;[R] General function prediction only	-	-	0.69	0.4	0.49	0.6	0.76	0.44	0.63	1.22	1.12	0.45	0.25	0.29	0.58	0.3	0.66	0
TRINITY_DN11184_c0_g1	1182	983	-	-	-	-	-	-	0.09	0	0	1.43	0.09	0.06	0	0	0	0	0.11	0	0.11	0.04	0.03	0
TRINITY_DN11184_c0_g2	1182	983	-	-	-	-	-	-	0.09	0	0	0	0.09	0.06	0.19	3.74	0.23	0.07	0	0	0.11	0.04	0.03	0
TRINITY_DN11187_c0_g1	225	37.13	-	-	-	-	-	-	0	0	0	0	44.27	0	0	2.81	1.85	0	0	0	10.92	7.92	0	0
TRINITY_DN11187_c0_g2	256	60.35	-	-	-	-	-	-	7.31	1.71	0	0	0	0	0	2.35	9.48	1.18	0	11.9	0	0	1.27	0
TRINITY_DN11187_c0_g3	256	60.35	-	-	-	-	-	-	0	0	0	0	9.38	0	0	0	0	0	0	0	0	3.2	0.42	0
TRINITY_DN11188_c0_g1	282	83.48	CHSP70	heat shock 70kDa protein 1/8	GO:0009570(chloroplast stroma);GO:0005524(ATP binding);GO:0051082(unfolded protein binding);GO:0006457(protein folding);GO:0006950(response to stress)	[O] Posttranslational modification, protein turnover, chaperones	K03283	ko03040(Spliceosome);ko04010(MAPK signaling pathway);ko04144(Endocytosis);ko04612(Antigen processing and presentation)	20.01	10.29	3.57	36.16	12.8	8.22	8.03	13.36	12.25	9.41	5.7	5.99	17.08	9.03	6.15	0
TRINITY_DN11188_c0_g2	282	83.48	CHSP70	heat shock 70kDa protein 1/8	GO:0009570(chloroplast stroma);GO:0005524(ATP binding);GO:0051082(unfolded protein binding);GO:0006457(protein folding);GO:0006950(response to stress)	[O] Posttranslational modification, protein turnover, chaperones	K03283	ko03040(Spliceosome);ko04010(MAPK signaling pathway);ko04144(Endocytosis);ko04612(Antigen processing and presentation)	11.47	7.51	0.66	39.16	7.88	9.82	7.51	14.08	20.49	4.68	6.13	32.18	27.1	5.36	6.44	0
TRINITY_DN11189_c0_g1	896	697	-	transcription initiation factor TFIIF beta subunit	-	-	K03139	ko03022(Basal transcription factors)	0.9	0.38	1.33	0.2	0.86	0.24	0.09	0	1.84	1.07	0.34	0.9	0.98	0.5	0.61	0
TRINITY_DN1118_c0_g1	346	147	-	-	-	-	-	-	1.02	0	0	0	0.47	0	0	1.93	0	0.12	0	0	0	0	0.12	0
TRINITY_DN1118_c0_g2	487	288	-	-	-	-	-	-	0.35	0.36	0.26	0.24	2.24	0	0	0	0.39	0	0	0	0	0.12	0	0
TRINITY_DN11190_c0_g1	621	422	-	-	-	-	-	-	0	7.7	0	0	0	8.06	6.93	4.31	7.49	2.59	0.95	2.44	11.82	11.56	5.78	0
TRINITY_DN11191_c0_g1	329	130	-	-	-	-	-	-	0.81	0.79	0	2.13	0	1	0	3.2	0.29	0	0.14	0	0.57	0.67	0	0
TRINITY_DN11192_c0_g1	273	75.15	-	-	-	-	-	-	0	0	0.3	0	0	0	0	0	0	0	0.49	0	0	0	0.45	0
TRINITY_DN11192_c0_g2	212	29.05	-	-	-	-	-	-	0	0	0	0	0	0.64	0	0	1.3	0	0	0	4.44	0	0	0
TRINITY_DN11192_c0_g3	366	167	-	-	-	-	-	-	0.76	0	1.42	0	0	0.11	0.13	0	0	0.21	0	0	0	0.21	0.2	0
TRINITY_DN11193_c0_g1	284	85.37	-	-	-	-	-	-	0	0	0	0	0	0.5	0	0	0	0	0	0	0	0	0.19	0
TRINITY_DN11194_c0_g1	439	240	-	-	-	-	-	-	0.11	0	0.31	0	0.3	0	0.18	0	0	0	0	0	2.69	0	0	0
TRINITY_DN11194_c0_g2	439	240	-	-	-	-	-	-	0.11	0	0	0	0	0	0.18	0	0.2	0	0	0	0	0	0	0
TRINITY_DN11194_c0_g3	387	188	-	-	-	-	-	-	0.85	0.44	0.3	0	1.82	0	0	0	1.25	0.47	0	0	0	0.28	0.18	0
TRINITY_DN11195_c0_g1	343	144	-	-	-	-	-	-	0	0	0	0	0	0.13	0.3	0	0.79	0	0	2.96	0	0.36	0	0
TRINITY_DN11195_c0_g2	342	143	-	-	-	-	-	-	0.29	0.14	0	0	0	0	0	0	0	0.25	0	3.14	0	0	0	0
TRINITY_DN11196_c0_g1	244	50.74	-	-	-	-	-	-	0	0	0	0	0	0	0	0	0	0	0	0	0	4.12	0	0
TRINITY_DN11197_c0_g1	284	85.37	-	-	-	-	-	-	0.74	1.45	0.43	5.48	0	0	3.49	13.75	0	0.42	0	0	2.16	1.22	0	4.44
TRINITY_DN11198_c0_g1	498	299	-	-	-	-	-	-	0.77	1.1	0.37	0.64	0.92	0.5	0.5	2.41	1.89	0.89	0.61	0	0.74	0.52	0.28	6.62
TRINITY_DN11199_c0_g1	493	294	atpI	F-type H+-transporting ATPase subunit a	GO:0009535(chloroplast thylakoid membrane);GO:0016021(integral to membrane);GO:0045263(proton-transporting ATP synthase complex, coupling factor F(o));GO:0015078(hydrogen ion transmembrane transporter activity);GO:0015986(ATP synthesis coupled proton transport)	[C] Energy production and conversion	K02108	ko00190(Oxidative phosphorylation);ko00195(Photosynthesis)	0.64	0.14	1.64	0.59	0	0.13	0	1.16	0.26	0.36	0.37	0	0	0.06	0.29	0
TRINITY_DN11199_c1_g1	268	70.66	atpI	F-type H+-transporting ATPase subunit a	GO:0009535(chloroplast thylakoid membrane);GO:0016021(integral to membrane);GO:0045263(proton-transporting ATP synthase complex, coupling factor F(o));GO:0015078(hydrogen ion transmembrane transporter activity);GO:0015986(ATP synthesis coupled proton transport)	[C] Energy production and conversion	K02108	ko00190(Oxidative phosphorylation);ko00195(Photosynthesis)	0.59	0	0	0	0	0	0.3	6.43	0.8	0.25	0	0	0	0	0	0
TRINITY_DN11199_c2_g1	204	24.6	atpI	F-type H+-transporting ATPase subunit a	GO:0009535(chloroplast thylakoid membrane);GO:0016021(integral to membrane);GO:0045263(proton-transporting ATP synthase complex, coupling factor F(o));GO:0015078(hydrogen ion transmembrane transporter activity);GO:0015986(ATP synthesis coupled proton transport)	[C] Energy production and conversion	K02108	ko00190(Oxidative phosphorylation);ko00195(Photosynthesis)	0	0	3.02	0	3.74	1.51	0.86	0	0	0	1.49	0	3	2.83	0.69	0
TRINITY_DN1119_c0_g1	1594	1395	GIP	-	-	[R] General function prediction only	-	-	5.64	0	1.78	0	0	0.41	0	0	4.8	1.84	0	0	1.53	0.52	0	0
TRINITY_DN1119_c0_g2	1300	1101	-	-	GO:0004190(aspartic-type endopeptidase activity);GO:0003677(DNA binding);GO:0004519(endonuclease activity);GO:0003964(RNA-directed DNA polymerase activity);GO:0008270(zinc ion binding);GO:0015074(DNA integration)	[R] General function prediction only	-	-	0	0	0	0	0	0	0	0	0	0	0	3.04	0	0	0	0
TRINITY_DN11200_c0_g1	397	198	-	-	-	-	-	-	9.71	13.65	5.72	23.94	7.88	9.89	8.94	53.08	13.08	6.13	4.39	23.17	18.92	7.33	8.49	11.69
TRINITY_DN11201_c0_g1	298	99	-	-	-	-	-	-	2.24	2.79	1.32	0	6.3	6.53	2.49	0	10.39	1.15	3.55	0	6.15	2.2	0.67	0
TRINITY_DN11201_c0_g2	297	98.01	-	-	-	-	-	-	15.9	4.25	10.21	0.48	5.85	23.15	16.45	1.35	7.82	10.83	22.01	0.69	4.89	4.61	4	4.94
TRINITY_DN11201_c0_g3	276	77.89	RBG1	-	-	[R] General function prediction only	-	-	10.34	10.24	28.43	51.6	6.58	14.6	29.03	0	8.42	11.88	2.03	10.62	0	7.49	24.5	15.82
TRINITY_DN11202_c0_g1	490	291	-	-	-	-	-	-	3.64	1.19	1.63	0	1.88	1.66	0.08	3.31	2.88	1.79	0.5	0	0.31	2.07	1.07	0
TRINITY_DN11202_c1_g1	547	348	-	-	-	-	-	-	1.12	0.65	0	0	0.65	0.38	0.56	0.39	0.56	0.46	0.11	3.22	0.36	0.6	0.27	0
TRINITY_DN11203_c0_g1	264	67.15	-	-	-	-	-	-	0.31	0	0	0	0	0	0.32	3.95	0	1.59	0	1	0	0	0.76	0
TRINITY_DN11203_c0_g2	264	67.15	-	-	-	-	-	-	0.31	0	0	0	0	0.28	0	0	1.4	0	0	0	1.1	0	0	0
TRINITY_DN11204_c0_g1	246	52.29	-	-	GO:0004190(aspartic-type endopeptidase activity);GO:0003677(DNA binding);GO:0004519(endonuclease activity);GO:0003964(RNA-directed DNA polymerase activity);GO:0008270(zinc ion binding);GO:0015074(DNA integration)	[R] General function prediction only	-	-	0	0	0	0	0	0.36	0	5.79	1.8	0	0	0	0	0.33	0	0
TRINITY_DN11204_c0_g2	236	44.76	-	-	-	-	-	-	0	0.46	0	0.15	0.51	0.42	0	0	0	0	0	0	0	0	1.52	19.75
TRINITY_DN11204_c0_g3	351	152	-	-	-	[R] General function prediction only	-	-	0	0	0	0.64	0	0	0	1.62	0	0	0	0	0	0	0	0
TRINITY_DN11205_c0_g1	363	164	VAMP722	vesicle-associated membrane protein 72	GO:0005768(endosome);GO:0016021(integral to membrane);GO:0005886(plasma membrane);GO:0009506(plasmodesma);GO:0005774(vacuolar membrane);GO:0015031(protein transport);GO:0016192(vesicle-mediated transport)	[U] Intracellular trafficking, secretion, and vesicular transport	K08511	-	0.77	0.38	0.45	0	2.25	0.23	0	0	2.53	1.19	0	0	0.45	3.08	0.1	0
TRINITY_DN11206_c0_g1	218	32.65	-	-	-	-	-	-	0	0	1.14	0	0	0	0	0.5	1.73	0	1.36	0	2.93	0	0	0
TRINITY_DN11206_c0_g2	302	103	-	-	-	-	-	-	0	0	0.36	0	0	0	0	0.94	0	0	0.28	0	0.86	0	0	0
TRINITY_DN11207_c0_g1	509	310	-	-	-	-	-	-	0.27	0.13	0.24	0.45	0.89	0.12	0.34	0	0.43	0	0	4.34	1.43	0.56	0.16	0
TRINITY_DN11208_c0_g1	297	98.01	ABI3	-	GO:0005829(cytosol);GO:0005634(nucleus);GO:0003677(DNA binding);GO:0005515(protein binding);GO:0009738(abscisic acid mediated signaling pathway);GO:0009790(embryo development);GO:0031930(mitochondria-nucleus signaling pathway);GO:0009657(plastid organization);GO:0045893(positive regulation of transcription, DNA-dependent);GO:0009733(response to auxin stimulus);GO:0006351(transcription, DNA-depend…	-	-	-	0	0.21	0	0.35	1.88	1.14	0.22	1.55	0.64	0	0.37	0	0.09	0.09	1.04	0
TRINITY_DN11208_c0_g2	297	98.01	ABI3	-	GO:0005829(cytosol);GO:0005634(nucleus);GO:0003677(DNA binding);GO:0005515(protein binding);GO:0009738(abscisic acid mediated signaling pathway);GO:0009790(embryo development);GO:0031930(mitochondria-nucleus signaling pathway);GO:0009657(plastid organization);GO:0045893(positive regulation of transcription, DNA-dependent);GO:0009733(response to auxin stimulus);GO:0006351(transcription, DNA-depend…	-	-	-	2.79	0	0	0	0	0	0.22	0	1.28	0.18	0.37	0	0.09	0.09	0	0
TRINITY_DN11209_c0_g1	325	126	-	-	-	-	-	-	0.33	0.49	0.59	0	0	0	1.69	1.5	2.09	0.28	0	0	0.29	0.14	0	0
TRINITY_DN1120_c0_g1	228	39.14	-	-	-	-	-	-	12.35	0.53	0.95	0	2.94	2.85	0.54	0.48	12.04	0.46	0	0	8.48	3.11	0	0
[truncated: 75,987 more rows]
