# Supplementary material for: Small RNA proﬁling for identification of microRNAs involved in regulation of seed development and lipid biosynthesis in yellowhorn
Source: Research Square preprint supplement (doi:10.21203/rs.3.rs-139285/v1), 2021-01-07
Supplement: Supplementary file 5 [file 849b7da825c5f79e8c2e9bc5.xlsx]

## Sheet: Table S6a
Table S6a Differentially expressed miRNAs between LO40 and LO54.
miR_name	miR_seq	up/down	fold_change(LO54(mean)/LO40(mean))	log2(fold_change)	pvalue(t_test)	LO40(mean)	LO54(mean)	LO40/LO40_1(norm)	LO40/LO40_2(norm)	LO54/LO54_1(norm)	LO54/LO54_2(norm)	LO40/LO40_1(raw)	LO40/LO40_2(raw)	LO54/LO54_1(raw)	LO54/LO54_2(raw)	Expression level
miR156e-p3_1	GCTCACATCTCTTTCTGTCAGC	up	3.07225	1.6193	0.000231598	125.51	385.597	122.69	128.329	388.107	383.088	257	161	321	522	middle
Xso-miRn49	AAATGATGTGGCACATGAGTT	up	3.87554	1.9544	0.0106695	8.12421	31.4857	6.6835	9.56492	33.249	29.7223	14	12	27.5	40.5	middle
Xso-miRn24	GGCGTGATGTTAGTGGTCCGGACG	down	0.452642	-1.14356	0.0150407	327.69	148.326	343.723	311.657	132.996	163.656	720	391	110	223	middle
miR5083_1	AATCAGACTACAATTATCTGATCT	down	0.296251	-1.75511	0.017063	58.2952	17.27	56.8097	59.7807	16.9268	17.6132	119	75	14	24	middle
miR394a-5p	TTGGCATTCTGTCCACCTCC	down	0.264499	-1.91867	0.0198615	285.656	75.5556	285.958	285.353	68.9162	82.1951	599	358	57	112	middle
miR3630-3p_2	ATGGGAATCTCTCTGATGCAT	down	0.407572	-1.29487	0.0219504	347.623	141.682	336.562	358.684	160.804	122.559	705	450	133	167	middle
miR171j-5p	TATTGGCCTGGTTCACTCAGA	down	0.125498	-2.99426	0.026022	95.6363	12.0022	103.594	87.6784	7.85886	16.1455	217	110	6.5	22	middle
miR390_1	CTCAGGAGGGATAGCGCC	up	inf	inf	0.0281474	0	6.32512	0	0	6.04528	6.60496	0	0	5	9	middle
miR5144-p5_1	GTGCGATGATGATGAGAA	down	-inf	-inf	0.039173	7.64468	0	8.11568	7.17369	0	0	17	9	0	0	low
Xso-miRn82	AAAAAACGTACGGGATCCCGCACC	down	0.385447	-1.3754	0.0414792	135.672	52.2945	122.69	148.655	41.1079	63.481	257	186.5	34	86.5	middle
miR159b_1	CTTGCATATCTCTGGAGCTTC	down	0.0908035	-3.46111	0.0422183	32.3285	2.93554	36.7592	27.8977	0	5.87108	77	35	0	8	middle
miR390a-3p_1	CGCTATCCATCCTGAGTTTCA	up	5.01062	2.32499	0.0436429	318.69	1596.83	425.357	212.022	1780.94	1412.73	891	266	1473	1925	middle
miR156i-3p_1	TGCTCACTTCTCCTCTGTCAGC	up	2.5387	1.34409	0.0452861	8160.34	20716.6	8351.51	7969.17	21746.1	19687.2	17494	9998	17986	26826	high
miR160c_1	TGCCTGGCTCCCTGGATGCCA	down	0.106841	-3.22646	0.0454341	27.4757	2.93554	26.2566	28.6948	0	5.87108	55	36	0	8	middle
miR160c-p3_1	AGCCATGCATGTGTAAGT	down	0.640976	-0.641659	0.0467791	20.3084	13.0172	19.0957	21.5211	12.0906	13.9438	40	27	10	19	middle
miR1536-p5_2	TGTTTTGCTTATTGTGCCATC	up	3.33982	1.73977	0.0497705	31.7371	105.996	29.5983	33.8758	113.651	98.3405	62	42.5	94	134	middle
miR403a-p5	GGTTTGTGCGTGAATTTAATA	down	0.215115	-2.21682	0.0498438	282.892	60.8542	257.315	308.469	51.9894	69.719	539	387	43	95	middle

## Sheet: Table S6b
Table S6b Differentially expressed miRNAs between LO54 and LO68.
miR_name	miR_seq	up/down	fold_change(LO68(mean)/LO54(mean))	log2(fold_change)	pvalue(t_test)	LO54(mean)	LO68(mean)	LO54/LO54_1(norm)	LO54/LO54_2(norm)	LO68/LO68_1(norm)	LO68/LO68_2(norm)	LO54/LO54_1(raw)	LO54/LO54_2(raw)	LO68/LO68_1(raw)	LO68/LO68_2(raw)	Expression level
miR156e-p3_1	GCTCACATCTCTTTCTGTCAGC	up	1.52573	0.609496	0.00477375	385.597	588.316	388.107	383.088	593.656	582.976	321	522	591	983	middle
miR482e-p3_1	TTCCCAACACCTCCCATACCGC	up	1.79433	0.843442	0.00986664	1317.46	2363.96	1372.28	1262.65	2290.75	2437.17	1135	1720.5	2280.5	4109.5	middle
miR172b	AGAATCTTGATGATGCTGCAT	down	0.337119	-1.56867	0.0110079	239.869	80.8644	229.116	250.622	87.8932	73.8357	189.5	341.5	87.5	124.5	middle
miR319a-p5_1	TGGCAATGAGGATTTATT	down	-inf	-inf	0.0150504	27.2434	0	26.5992	27.8876	0	0	22	38	0	0	middle
miR160c_2	GTGCCTGGCTCCCTGTATGCC	down	0.435701	-1.19859	0.0184275	17.3888	7.57632	17.5313	17.2463	8.03595	7.1167	14.5	23.5	8	12	middle
miR5077_1	TTCACGTCGGGTTCACCA	down	0.247739	-2.01311	0.0210093	188.159	46.6144	203.121	173.197	32.1438	61.085	168	236	32	103	middle
Xso-miRn80	TTGGTGTTCTTGGTGGAGATC	up	inf	inf	0.0215525	0	16.6353	0	0	16.0719	17.1987	0	0	16	29	middle
miR159a-5p	GAGCTCCTTGAAGTCCAATAG	down	0.119956	-3.05942	0.0251993	652.325	78.2503	678.28	626.37	82.3685	74.1322	561	853.5	82	125	middle
Xso-miRn27	TGAACCACATTTACCCTCAAG	up	3.11343	1.6385	0.0274396	29.5744	92.0779	25.3902	33.7587	93.4179	90.7379	21	46	93	153	middle
miR390_1	CTCAGGAGGGATAGCGCC	down	-inf	-inf	0.0281474	6.32512	0	6.04528	6.60496	0	0	5	9	0	0	middle
miR403a-p5	GGTTTGTGCGTGAATTTAATA	up	1.99976	0.999826	0.0376386	60.8542	121.694	51.9894	69.719	113.508	129.88	43	95	113	219	middle
miR482b-3p_1	TCTTTCCAACACCTCCCATACC	up	1.91686	0.938743	0.0387025	54132.4	103764	46931.9	61332.9	98829.1	108699	38817	83573	98387	183286	high
Xso-miRn82	AAAAAACGTACGGGATCCCGCACC	up	3.11396	1.63875	0.0423248	52.2945	162.843	41.1079	63.481	166.746	158.94	34	86.5	166	268	middle
miR160c-p3_1	AGCCATGCATGTGTAAGT	down	-inf	-inf	0.0452411	13.0172	0	12.0906	13.9438	0	0	10	19	0	0	middle
miR172b-5p_1	GTAGCATCATCAAGATTCACA	down	0.0441243	-4.50228	0.0492256	33.6015	1.48264	37.4807	29.7223	0	2.96529	31	40.5	0	5	middle

## Sheet: Table S6c
Table S6c Differentially expressed miRNAs between LO68 and LO81.
miR_name	miR_seq	up/down	fold_change(LO81(mean)/LO68(mean))	log2(fold_change)	pvalue(t_test)	LO68(mean)	LO81(mean)	LO68/LO68_1(norm)	LO68/LO68_2(norm)	LO81/LO81_1(norm)	LO81/LO81_2(norm)	LO68/LO68_1(raw)	LO68/LO68_2(raw)	LO81/LO81_1(raw)	LO81/LO81_2(raw)	Expression level
Xso-miRn47	TGCCACATCATAGGTTGGGATCC	down	-inf	-inf	7.884e-05	75.3277	0	75.337	75.3184	0	0	75	127	0	0	middle
miR3630-3p_2	ATGGGAATCTCTCTGATGCAT	up	8.76564	3.13186	0.00139338	30.2571	265.223	26.1168	34.3974	259.616	270.83	26	58	94	190	middle
miR5303j-p3_1	ATTCAAATTTCTGCCCTA	up	inf	inf	0.0100903	0	12.6286	0	0	12.4284	12.8288	0	0	4.5	9	middle
miR5303j-p5_1	ATTCAAATTTCTGCCCTA	up	inf	inf	0.0100903	0	12.6286	0	0	12.4284	12.8288	0	0	4.5	9	middle
miR319d-p3_1	TGCATTAAGGCAAAACTTGACATG	down	-inf	-inf	0.0109699	10.8622	0	11.0494	10.675	0	0	11	18	0	0	middle
miR2118b-p3_1	TTGCCAATTCCACCCATGC	up	3.86493	1.95044	0.0155793	61.8458	239.03	45.7044	77.9871	226.473	251.586	45.5	131.5	82	176.5	middle
miR2118b-p5_1	TTGCCAATTCCACCCATGC	up	3.86493	1.95044	0.0155793	61.8458	239.03	45.7044	77.9871	226.473	251.586	45.5	131.5	82	176.5	middle
miR7760-p3_1	GGAGGCGGTGGAGGTGGA	up	inf	inf	0.0202325	0	397.5	0	0	410.138	384.863	0	0	148.5	270	middle
Xso-miRn80	TTGGTGTTCTTGGTGGAGATC	down	-inf	-inf	0.0215525	16.6353	0	16.0719	17.1987	0	0	16	29	0	0	middle
miR2645-p3_1	TAACTCTCTTCAATTATTCC	up	10.5556	3.39994	0.0244356	4.44793	46.9508	0	8.89587	49.7137	44.188	0	15	18	31	middle
miR166a_1	TCTCGGACCAGGCTTCATTCC	up	1.48242	0.567955	0.0267618	5006.79	7422.17	5240.94	4772.63	7544.05	7300.28	5217.5	8047.5	2731.5	5121.5	high
Xso-miRn62	TTATGCTGATCTTTGCCCTGACCT	down	-inf	-inf	0.0270598	8.67163	0	9.04044	8.30281	0	0	9	14	0	0	middle
Xso-miRn82	AAAAAACGTACGGGATCCCGCACC	down	0.27902	-1.84156	0.0295313	162.843	45.4364	166.746	158.94	55.2374	35.6355	166	268	20	25	middle
miR166e-5p	GGAATGTTGTCTGGCTCGAGG	down	0.434742	-1.20177	0.0370666	433.677	188.537	408.327	459.027	153.284	223.791	406.5	774	55.5	157	middle
miR160c_2	GTGCCTGGCTCCCTGTATGCC	down	-inf	-inf	0.0385741	7.57632	0	8.03595	7.1167	0	0	8	12	0	0	middle
miR171k-5p_1	CGATATTGGTGAGGTTCAATC	down	-inf	-inf	0.0385741	13.2586	0	14.0629	12.4542	0	0	14	21	0	0	middle
miR403a-p5	GGTTTGTGCGTGAATTTAATA	down	0.506607	-0.981062	0.0409378	121.694	61.6508	113.508	129.88	66.2849	57.0168	113	219	24	40	middle
Xso-miRn13	ATCCCAACTTATCCCAACCCATGA	down	0.0875171	-3.51429	0.041549	65.1493	5.70168	63.2831	67.0155	0	11.4034	63	113	0	8	middle
miR156e-3p_1	GCTCACCCTCTCTCTGTCACC	up	3.11713	1.64022	0.0472303	10888.5	33941	14586.2	7190.83	30292.2	37589.7	14521	12125	10968	26371	high
miR5655-p3	TGGTGGTGGTGGAGGAGGA	up	inf	inf	0.0477626	0	19.2659	0	0	20.714	17.8177	0	0	7.5	12.5	middle
