# Supplementary material for: Small RNA proﬁling for identification of microRNAs involved in regulation of seed development and lipid biosynthesis in yellowhorn
Source: Research Square preprint supplement (doi:10.21203/rs.3.rs-139285/v1), 2021-01-07
Supplement: Supplementary file 9 [file 150dcc594558c85f1fd66756.xlsx]

## Sheet: Table S7
Table S7 Targets prediction of all differentially expressed miRNAs.
miRNA ID	Transcript ID	Gene ID	Gene Annoation	Score	Range	Strand	GO	KEGG
miR156e-3p_1	TRINITY_DN28996_c0_g1	TRINITY_DN28996_c0_g1	sp|Q93YW0|EXEC1_ARATH Protein EXECUTER 1, chloroplastic OS=Arabidopsis thaliana GN=EX1 PE=1 SV=1	3	3197-3217	1	GO:0009507(chloroplast);GO:0042651(thylakoid membrane);GO:0003677(DNA binding);GO:0004518(nuclease activity);GO:0006289(nucleotide-excision repair);GO:0000304(response to singlet oxygen)
miR156e-3p_1	TRINITY_DN27554_c1_g1	TRINITY_DN27554_c1_g1	sp|Q84TQ7|GAI_GOSHI DELLA protein GAI OS=Gossypium hirsutum GN=GAI PE=2 SV=1	3.5	1797-1817	1	GO:0005634(nucleus);GO:0009740(gibberellic acid mediated signaling pathway);GO:0006355(regulation of transcription, DNA-dependent);GO:0006351(transcription, DNA-dependent)
miR156e-3p_1	TRINITY_DN31638_c0_g1	TRINITY_DN31638_c0_g1	-	3.5	896-915	1
miR156e-3p_1	TRINITY_DN27452_c0_g1	TRINITY_DN27452_c0_g1	-	4	63-83	1
miR156e-3p_1	TRINITY_DN27452_c0_g4	TRINITY_DN27452_c0_g4	-	4	63-83	1
miR156e-3p_1	TRINITY_DN27452_c0_g3	TRINITY_DN27452_c0_g3	-	4	63-83	1
miR156e-3p_1	TRINITY_DN27452_c0_g2	TRINITY_DN27452_c0_g2	-	4	63-83	1
miR156e-3p_1	TRINITY_DN18944_c0_g2	TRINITY_DN18944_c0_g2	-	4	115-134	1
miR156e-3p_1	TRINITY_DN18944_c0_g1	TRINITY_DN18944_c0_g1	-	4	116-135	1
miR156e-3p_1	TRINITY_DN17464_c0_g1	TRINITY_DN17464_c0_g1	sp|F4HVY0|CER1_ARATH Protein ECERIFERUM 1 OS=Arabidopsis thaliana GN=CER1 PE=1 SV=1	4	53-73	1
miR156e-3p_1	TRINITY_DN45960_c0_g1	TRINITY_DN45960_c0_g1	-	4	62-82	1
miR156e-3p_1	TRINITY_DN9212_c0_g1	TRINITY_DN9212_c0_g1	sp|P80299|HYES_RAT Bifunctional epoxide hydrolase 2 OS=Rattus norvegicus GN=Ephx2 PE=1 SV=1	4	1198-1218	1	GO:0005829(cytosol);GO:0005777(peroxisome);GO:0003869(4-nitrophenylphosphatase activity);GO:0004301(epoxide hydrolase activity);GO:0000287(magnesium ion binding);GO:0019439(aromatic compound catabolic process);GO:0043651(linoleic acid metabolic process);GO:0045777(positive regulation of blood pressure);GO:0002539(prostaglandin production involved in inflammatory response);GO:0009636(response to t…
miR156e-3p_1	TRINITY_DN21752_c0_g1	TRINITY_DN21752_c0_g1	sp|O04905|KCY_ARATH UMP-CMP kinase OS=Arabidopsis thaliana GN=PYR6 PE=1 SV=1	4	956-976	1	GO:0005829(cytosol);GO:0005524(ATP binding);GO:0004127(cytidylate kinase activity);GO:0009041(uridylate kinase activity);GO:0006221(pyrimidine nucleotide biosynthetic process);GO:0009173(pyrimidine ribonucleoside monophosphate metabolic process)	ko00240(Pyrimidine metabolism)
miR164a-5p	TRINITY_DN31397_c0_g1	TRINITY_DN31397_c0_g1	-	3.5	806-827	1
miR164a-5p	TRINITY_DN49094_c0_g1	TRINITY_DN49094_c0_g1	-	4	1854-1874	1
miR164a-5p	TRINITY_DN10157_c0_g1	TRINITY_DN10157_c0_g1	sp|Q9LK03|PERK2_ARATH Proline-rich receptor-like protein kinase PERK2 OS=Arabidopsis thaliana GN=PERK2 PE=2 SV=3	4	244-263	1	GO:0016021(integral to membrane);GO:0005886(plasma membrane);GO:0005524(ATP binding);GO:0004674(protein serine/threonine kinase activity);GO:0004872(receptor activity)
miR164a-5p	TRINITY_DN23129_c0_g7	TRINITY_DN23129_c0_g7	sp|P59326|YTHD1_MOUSE YTH domain family protein 1 OS=Mus musculus GN=Ythdf1 PE=2 SV=1	4	968-988	1
miR171c-5p	TRINITY_DN6172_c0_g1	TRINITY_DN6172_c0_g1	sp|O23210|SCL15_ARATH Scarecrow-like protein 15 OS=Arabidopsis thaliana GN=SCL15 PE=2 SV=3	2.5	206-226	1	GO:0005634(nucleus);GO:0030154(cell differentiation);GO:0006355(regulation of transcription, DNA-dependent);GO:0006351(transcription, DNA-dependent)
miR171c-5p	TRINITY_DN6172_c0_g2	TRINITY_DN6172_c0_g2	sp|O23210|SCL15_ARATH Scarecrow-like protein 15 OS=Arabidopsis thaliana GN=SCL15 PE=2 SV=3	2.5	791-811	1	GO:0005634(nucleus);GO:0030154(cell differentiation);GO:0006355(regulation of transcription, DNA-dependent);GO:0006351(transcription, DNA-dependent)
miR171c-5p	TRINITY_DN20283_c0_g1	TRINITY_DN20283_c0_g1	sp|O81316|SCL6_ARATH Scarecrow-like protein 6 OS=Arabidopsis thaliana GN=SCL6 PE=1 SV=1	2.5	1305-1325	1	GO:0005634(nucleus);GO:0005515(protein binding);GO:0051301(cell division);GO:0007623(circadian rhythm);GO:0006355(regulation of transcription, DNA-dependent);GO:0048768(root hair cell tip growth);GO:0006351(transcription, DNA-dependent)
miR171c-5p	TRINITY_DN23379_c0_g2	TRINITY_DN23379_c0_g2	-	2.5	49-69	1
miR171c-5p	TRINITY_DN27761_c2_g3	TRINITY_DN27761_c2_g3	sp|O81316|SCL6_ARATH Scarecrow-like protein 6 OS=Arabidopsis thaliana GN=SCL6 PE=1 SV=1	2.5	1375-1395	1	GO:0005634(nucleus);GO:0005515(protein binding);GO:0051301(cell division);GO:0007623(circadian rhythm);GO:0006355(regulation of transcription, DNA-dependent);GO:0048768(root hair cell tip growth);GO:0006351(transcription, DNA-dependent)
miR171c-5p	TRINITY_DN29489_c1_g2	TRINITY_DN29489_c1_g2	-	4	167-187	1
miR393-5p_1	TRINITY_DN24852_c0_g1	TRINITY_DN24852_c0_g1	sp|Q9SPU7|TERT_ARATH Telomerase reverse transcriptase OS=Arabidopsis thaliana GN=TERT PE=1 SV=1	4	2728-2749	1	GO:0000781(chromosome, telomeric region);GO:0005634(nucleus);GO:0003677(DNA binding);GO:0046872(metal ion binding);GO:0003723(RNA binding);GO:0003721(telomeric template RNA reverse transcriptase activity);GO:0050000(chromosome localization);GO:0007000(nucleolus organization);GO:0007004(telomere maintenance via telomerase)
miR159c_1	TRINITY_DN14791_c0_g1	TRINITY_DN14791_c0_g1	-	1	437-459	1
miR159c_1	TRINITY_DN42448_c0_g1	TRINITY_DN42448_c0_g1	-	2.5	214-236	1
miR159c_1	TRINITY_DN19342_c0_g1	TRINITY_DN19342_c0_g1	-	2.5	508-530	1
miR159c_1	TRINITY_DN37133_c0_g1	TRINITY_DN37133_c0_g1	-	3.5	259-281	1
miR159c_1	TRINITY_DN1036_c0_g1	TRINITY_DN1036_c0_g1	-	4	348-370	1
miR167c-3p_1	TRINITY_DN26454_c3_g2	TRINITY_DN26454_c3_g2	-	2	1390-1410	1
miR5647-p3_1	TRINITY_DN31099_c0_g1	TRINITY_DN31099_c0_g1	-	0	15-32	1
miR5647-p3_1	TRINITY_DN31099_c0_g5	TRINITY_DN31099_c0_g5	-	0	204-221	1
miR5647-p3_1	TRINITY_DN31099_c0_g3	TRINITY_DN31099_c0_g3	-	2	39-56	1
miR5647-p3_1	TRINITY_DN31099_c0_g2	TRINITY_DN31099_c0_g2	-	2	186-203	1
miR5647-p3_1	TRINITY_DN31099_c0_g4	TRINITY_DN31099_c0_g4	-	2	185-202	1
miR5647-p3_1	TRINITY_DN25895_c0_g2	TRINITY_DN25895_c0_g2	sp|Q09MB8|YCF1_CITSI Putative membrane protein ycf1 OS=Citrus sinensis GN=ycf1-A PE=3 SV=1	2	362-379	1	GO:0031969(chloroplast membrane);GO:0016021(integral to membrane)
miR5647-p3_1	TRINITY_DN25895_c0_g3	TRINITY_DN25895_c0_g3	sp|Q09MB8|YCF1_CITSI Putative membrane protein ycf1 OS=Citrus sinensis GN=ycf1-A PE=3 SV=1	2	382-399	1	GO:0031969(chloroplast membrane);GO:0016021(integral to membrane)
miR5647-p3_1	TRINITY_DN32799_c7_g1	TRINITY_DN32799_c7_g1	sp|Q09MB8|YCF1_CITSI Putative membrane protein ycf1 OS=Citrus sinensis GN=ycf1-A PE=3 SV=1	2	30-47	1	GO:0031969(chloroplast membrane);GO:0016021(integral to membrane)
miR5647-p3_1	TRINITY_DN25895_c0_g1	TRINITY_DN25895_c0_g1	sp|A0ZZ93|YCF1_GOSBA Putative membrane protein ycf1 OS=Gossypium barbadense GN=ycf1 PE=3 SV=1	2	1735-1752	1	GO:0031969(chloroplast membrane);GO:0016021(integral to membrane)	ko03010(Ribosome)
miR5647-p3_1	TRINITY_DN32799_c6_g1	TRINITY_DN32799_c6_g1	sp|Q09MB8|YCF1_CITSI Putative membrane protein ycf1 OS=Citrus sinensis GN=ycf1-A PE=3 SV=1	2.5	1557-1575	1	GO:0031969(chloroplast membrane);GO:0016021(integral to membrane)
miR5647-p3_1	TRINITY_DN22757_c0_g1	TRINITY_DN22757_c0_g1	-	3	86-103	1
miR5647-p3_1	TRINITY_DN27558_c0_g1	TRINITY_DN27558_c0_g1	-	3	104-121	1
miR5647-p3_1	TRINITY_DN27762_c0_g1	TRINITY_DN27762_c0_g1	-	3	117-135	1
miR5647-p3_1	TRINITY_DN29539_c0_g1	TRINITY_DN29539_c0_g1	sp|O49318|Y2317_ARATH Probable leucine-rich repeat receptor-like protein kinase At2g33170 OS=Arabidopsis thaliana GN=At2g33170 PE=2 SV=1	3	3162-3178	1	GO:0016021(integral to membrane);GO:0005524(ATP binding);GO:0004674(protein serine/threonine kinase activity);GO:0004872(receptor activity)
miR5647-p3_1	TRINITY_DN43616_c0_g1	TRINITY_DN43616_c0_g1	-	3.5	130-148	1
miR5647-p3_1	TRINITY_DN29077_c0_g1	TRINITY_DN29077_c0_g1	sp|O14111|PSD3_SCHPO Phosphatidylserine decarboxylase proenzyme 3 OS=Schizosaccharomyces pombe (strain 972 / ATCC 24843) GN=psd3 PE=3 SV=2	3.5	2225-2242	1	GO:0032153(cell division site);GO:0005829(cytosol);GO:0000329(fungal-type vacuole membrane);GO:0000139(Golgi membrane);GO:0004609(phosphatidylserine decarboxylase activity);GO:0006656(phosphatidylcholine biosynthetic process)	ko00564(Glycerophospholipid metabolism)
miR5647-p3_1	TRINITY_DN22353_c0_g2	TRINITY_DN22353_c0_g2	-	3.5	543-560	1
miR5647-p3_1	TRINITY_DN9866_c0_g1	TRINITY_DN9866_c0_g1	-	3.5	141-157	1
miR5647-p3_1	TRINITY_DN5868_c0_g1	TRINITY_DN5868_c0_g1	-	3.5	40-57	1
miR5647-p3_1	TRINITY_DN8697_c0_g1	TRINITY_DN8697_c0_g1	-	3.5	453-469	1
miR5647-p3_1	TRINITY_DN8697_c0_g2	TRINITY_DN8697_c0_g2	-	3.5	453-469	1
miR5647-p3_1	TRINITY_DN33141_c3_g2	TRINITY_DN33141_c3_g2	sp|P10978|POLX_TOBAC Retrovirus-related Pol polyprotein from transposon TNT 1-94 OS=Nicotiana tabacum PE=2 SV=1	3.5	3783-3800	1	GO:0004190(aspartic-type endopeptidase activity);GO:0003677(DNA binding);GO:0004519(endonuclease activity);GO:0003964(RNA-directed DNA polymerase activity);GO:0008270(zinc ion binding);GO:0015074(DNA integration)
miR5647-p3_1	TRINITY_DN14501_c0_g1	TRINITY_DN14501_c0_g1	-	3.5	1159-1175	1
miR5647-p3_1	TRINITY_DN50205_c0_g1	TRINITY_DN50205_c0_g1	-	4	124-141	1
miR5647-p3_1	TRINITY_DN36562_c0_g1	TRINITY_DN36562_c0_g1	-	4	333-350	1
miR5647-p3_1	TRINITY_DN43885_c0_g1	TRINITY_DN43885_c0_g1	-	4	241-258	1
miR5647-p3_1	TRINITY_DN37600_c0_g1	TRINITY_DN37600_c0_g1	-	4	14-31	1
miR5647-p3_1	TRINITY_DN48898_c0_g1	TRINITY_DN48898_c0_g1	-	4	91-108	1
miR5647-p3_1	TRINITY_DN10269_c0_g1	TRINITY_DN10269_c0_g1	-	4	54-71	1
miR5647-p3_1	TRINITY_DN33631_c0_g1	TRINITY_DN33631_c0_g1	-	4	29-47	1
miR5647-p3_1	TRINITY_DN2547_c0_g1	TRINITY_DN2547_c0_g1	-	4	540-557	1
miR5647-p3_1	TRINITY_DN2547_c0_g2	TRINITY_DN2547_c0_g2	-	4	540-557	1
miR5647-p3_1	TRINITY_DN17735_c0_g2	TRINITY_DN17735_c0_g2	sp|Q9SLD2|DGAT1_ARATH Diacylglycerol O-acyltransferase 1 OS=Arabidopsis thaliana GN=DGAT1 PE=1 SV=2	4	121-138	1	GO:0031969(chloroplast membrane);GO:0005789(endoplasmic reticulum membrane);GO:0016021(integral to membrane);GO:0004144(diacylglycerol O-acyltransferase activity);GO:0007568(aging);GO:0009793(embryo development ending in seed dormancy);GO:0006071(glycerol metabolic process);GO:0010030(positive regulation of seed germination);GO:0045995(regulation of embryonic development);GO:0009737(response to a…
miR5647-p3_1	TRINITY_DN1032_c0_g1	TRINITY_DN1032_c0_g1	-	4	29-47	1
miR5647-p3_1	TRINITY_DN32471_c0_g1	TRINITY_DN32471_c0_g1	sp|Q9STT5|AB7A_ARATH ABC transporter A family member 7 OS=Arabidopsis thaliana GN=ABCA7 PE=3 SV=2	4	2637-2654	1	GO:0016021(integral to membrane);GO:0005886(plasma membrane);GO:0009506(plasmodesma);GO:0005524(ATP binding);GO:0016887(ATPase activity);GO:0006810(transport)	ko02010(ABC transporters)
miR5647-p3_1	TRINITY_DN15838_c0_g1	TRINITY_DN15838_c0_g1	-	4	797-814	1
miR5647-p3_1	TRINITY_DN36537_c0_g1	TRINITY_DN36537_c0_g1	-	4	92-109	1
miR5647-p3_1	TRINITY_DN27187_c0_g7	TRINITY_DN27187_c0_g7	sp|Q42551|SCE1_ARATH SUMO-conjugating enzyme SCE1 OS=Arabidopsis thaliana GN=SCE1 PE=1 SV=1	4	109-126	1	GO:0005634(nucleus);GO:0005524(ATP binding);GO:0005515(protein binding);GO:0019789(SUMO ligase activity);GO:0009793(embryo development ending in seed dormancy);GO:0016925(protein sumoylation);GO:0009737(response to abscisic acid stimulus)	ko04120(Ubiquitin mediated proteolysis)
miR5647-p3_1	TRINITY_DN46845_c0_g1	TRINITY_DN46845_c0_g1	sp|Q8LBQ7|ERF34_ARATH Ethylene-responsive transcription factor ERF034 OS=Arabidopsis thaliana GN=ERF034 PE=2 SV=2	4	340-357	1	GO:0005634(nucleus);GO:0003677(DNA binding);GO:0003700(sequence-specific DNA binding transcription factor activity);GO:0009873(ethylene mediated signaling pathway)
miR5647-p3_1	TRINITY_DN18374_c0_g1	TRINITY_DN18374_c0_g1	sp|Q9XF63|ATL3_ARATH RING-H2 finger protein ATL3 OS=Arabidopsis thaliana GN=ATL3 PE=2 SV=1	4	479-497	1	GO:0016021(integral to membrane);GO:0008270(zinc ion binding)
miR5647-p3_1	TRINITY_DN27187_c0_g8	TRINITY_DN27187_c0_g8	-	4	109-126	1		ko04120(Ubiquitin mediated proteolysis)
miR5647-p3_1	TRINITY_DN32545_c1_g3	TRINITY_DN32545_c1_g3	sp|Q8L467|BH104_ARATH Transcription factor bHLH104 OS=Arabidopsis thaliana GN=BHLH104 PE=2 SV=1	4	1023-1040	1	GO:0005634(nucleus);GO:0003677(DNA binding);GO:0006355(regulation of transcription, DNA-dependent);GO:0006351(transcription, DNA-dependent)
miR5647-p3_1	TRINITY_DN26024_c1_g1	TRINITY_DN26024_c1_g1	sp|Q9FPW6|POB1_ARATH BTB/POZ domain-containing protein POB1 OS=Arabidopsis thaliana GN=POB1 PE=2 SV=2	4	1619-1636	1
miR5647-p3_1	TRINITY_DN27187_c0_g1	TRINITY_DN27187_c0_g1	sp|Q42551|SCE1_ARATH SUMO-conjugating enzyme SCE1 OS=Arabidopsis thaliana GN=SCE1 PE=1 SV=1	4	508-525	1	GO:0005634(nucleus);GO:0005524(ATP binding);GO:0005515(protein binding);GO:0019789(SUMO ligase activity);GO:0009793(embryo development ending in seed dormancy);GO:0016925(protein sumoylation);GO:0009737(response to abscisic acid stimulus)	ko04120(Ubiquitin mediated proteolysis)
miR5647-p3_1	TRINITY_DN25329_c0_g1	TRINITY_DN25329_c0_g1	-	4	12-29	1
miR5647-p3_1	TRINITY_DN17428_c1_g1	TRINITY_DN17428_c1_g1	-	4	370-388	1
miR5647-p3_1	TRINITY_DN25999_c1_g1	TRINITY_DN25999_c1_g1	sp|Q8H1H9|AMO_ARATH Primary amine oxidase OS=Arabidopsis thaliana GN=At1g62810 PE=2 SV=1	4	702-719	1	GO:0052595(aliphatic-amine oxidase activity);GO:0052594(aminoacetone:oxygen oxidoreductase);GO:0005507(copper ion binding);GO:0052596(phenethylamine:oxygen oxidoreductase );GO:0008131(primary amine oxidase activity);GO:0048038(quinone binding);GO:0052593(tryptamine:oxygen oxidoreductase );GO:0009308(amine metabolic process)	ko00260(Glycine,ko serine and threonine metabolism);ko00350(Tyrosine metabolism);ko00360(Phenylalanine metabolism);ko00410(beta-Alanine metabolism);ko00950(Isoquinoline alkaloid biosynthesis);ko00960(Tropane,ko piperidine and pyridine alkaloid biosynthesis)
miR5647-p3_1	TRINITY_DN5566_c1_g1	TRINITY_DN5566_c1_g1	-	4	59-76	1
miR5647-p3_1	TRINITY_DN36144_c0_g1	TRINITY_DN36144_c0_g1	-	4	14-31	1
miR5647-p3_1	TRINITY_DN5488_c0_g1	TRINITY_DN5488_c0_g1	sp|Q9LK03|PERK2_ARATH Proline-rich receptor-like protein kinase PERK2 OS=Arabidopsis thaliana GN=PERK2 PE=2 SV=3	4	180-197	1	GO:0016021(integral to membrane);GO:0005886(plasma membrane);GO:0005524(ATP binding);GO:0004674(protein serine/threonine kinase activity);GO:0004872(receptor activity)
miR5647-p3_1	TRINITY_DN32552_c0_g2	TRINITY_DN32552_c0_g2	sp|Q9SSR7|FBL31_ARATH F-box/LRR-repeat protein At1g52650 OS=Arabidopsis thaliana GN=At1g52650 PE=2 SV=1	4	1146-1163	1
miR5647-p3_1	TRINITY_DN32627_c1_g1	TRINITY_DN32627_c1_g1	sp|P27572|NU4M_WHEAT NADH-ubiquinone oxidoreductase chain 4 OS=Triticum aestivum GN=ND4 PE=2 SV=2	4	3078-3095	1	GO:0016021(integral to membrane);GO:0031966(mitochondrial membrane);GO:0070469(respiratory chain);GO:0008137(NADH dehydrogenase );GO:0042773(ATP synthesis coupled electron transport);GO:0006810(transport)	ko00190(Oxidative phosphorylation)
miR5647-p3_1	TRINITY_DN31881_c3_g1	TRINITY_DN31881_c3_g1	sp|Q700D2|JKD_ARATH Zinc finger protein JACKDAW OS=Arabidopsis thaliana GN=JKD PE=1 SV=1	4	558-575	1	GO:0005634(nucleus);GO:0003677(DNA binding);GO:0042803(protein homodimerization activity);GO:0008270(zinc ion binding);GO:0051302(regulation of cell division);GO:0045604(regulation of epidermal cell differentiation);GO:0010075(regulation of meristem growth);GO:0006355(regulation of transcription, DNA-dependent);GO:0048364(root development);GO:0006351(transcription, DNA-dependent)
miR5647-p3_1	TRINITY_DN37252_c0_g1	TRINITY_DN37252_c0_g1	-	4	354-371	1
miR5647-p3_1	TRINITY_DN28492_c0_g2	TRINITY_DN28492_c0_g2	sp|Q9LID0|LDL2_ARATH Lysine-specific histone demethylase 1 homolog 2 OS=Arabidopsis thaliana GN=LDL2 PE=2 SV=1	4	505-522	1	GO:0016491(oxidoreductase activity);GO:0051568(histone H3-K4 methylation);GO:0006355(regulation of transcription, DNA-dependent);GO:0006351(transcription, DNA-dependent)
miR5655-p3	TRINITY_DN36297_c0_g2	TRINITY_DN36297_c0_g2	sp|Q9U7E0|ATRX_CAEEL Transcriptional regulator ATRX homolog OS=Caenorhabditis elegans GN=xnp-1 PE=1 SV=1	0	285-303	1	GO:0005634(nucleus);GO:0005524(ATP binding);GO:0003677(DNA binding);GO:0004386(helicase activity);GO:0006281(DNA repair);GO:0009792(embryo development ending in birth or egg hatching);GO:0008406(gonad development);GO:0040035(hermaphrodite genitalia development);GO:0002009(morphogenesis of an epithelium);GO:0040025(vulval development)
miR5655-p3	TRINITY_DN36297_c0_g1	TRINITY_DN36297_c0_g1	-	0	289-307	1
miR5655-p3	TRINITY_DN21890_c1_g1	TRINITY_DN21890_c1_g1	sp|Q9S7L5|ERF18_ARATH Ethylene-responsive transcription factor ERF018 OS=Arabidopsis thaliana GN=ERF018 PE=2 SV=1	0	729-747	1	GO:0005634(nucleus);GO:0003677(DNA binding);GO:0003700(sequence-specific DNA binding transcription factor activity);GO:0009873(ethylene mediated signaling pathway);GO:0009607(response to biotic stimulus);GO:0009611(response to wounding)
miR5655-p3	TRINITY_DN17425_c0_g15	TRINITY_DN17425_c0_g15	-	0	415-433	1
miR5655-p3	TRINITY_DN17425_c0_g1	TRINITY_DN17425_c0_g1	-	0	422-440	1
miR5655-p3	TRINITY_DN17425_c0_g10	TRINITY_DN17425_c0_g10	-	0	423-441	1
miR5655-p3	TRINITY_DN17425_c0_g4	TRINITY_DN17425_c0_g4	-	0	184-202	1
miR5655-p3	TRINITY_DN17425_c0_g8	TRINITY_DN17425_c0_g8	-	0	184-202	1
miR5655-p3	TRINITY_DN17425_c0_g14	TRINITY_DN17425_c0_g14	-	0	184-202	1
miR5655-p3	TRINITY_DN17425_c0_g12	TRINITY_DN17425_c0_g12	-	0	184-202	1
miR5655-p3	TRINITY_DN17425_c0_g7	TRINITY_DN17425_c0_g7	-	0	184-202	1
miR5655-p3	TRINITY_DN17425_c0_g5	TRINITY_DN17425_c0_g5	-	0	184-202	1
miR5655-p3	TRINITY_DN17425_c0_g2	TRINITY_DN17425_c0_g2	-	0	184-202	1
miR5655-p3	TRINITY_DN17425_c0_g11	TRINITY_DN17425_c0_g11	-	0	184-202	1
miR5655-p3	TRINITY_DN17425_c0_g9	TRINITY_DN17425_c0_g9	-	0	184-202	1
miR5655-p3	TRINITY_DN17425_c0_g13	TRINITY_DN17425_c0_g13	-	0	184-202	1
miR5655-p3	TRINITY_DN17425_c0_g6	TRINITY_DN17425_c0_g6	-	0	184-202	1
miR5655-p3	TRINITY_DN17425_c0_g3	TRINITY_DN17425_c0_g3	-	0	184-202	1
miR5655-p3	TRINITY_DN29364_c0_g1	TRINITY_DN29364_c0_g1	sp|Q93WV0|WRK20_ARATH Probable WRKY transcription factor 20 OS=Arabidopsis thaliana GN=WRKY20 PE=2 SV=1	0	1905-1923	1	GO:0005634(nucleus);GO:0043565(sequence-specific DNA binding);GO:0003700(sequence-specific DNA binding transcription factor activity);GO:0045893(positive regulation of transcription, DNA-dependent);GO:0009961(response to 1-aminocyclopropane-1-carboxylic acid);GO:0009611(response to wounding)
miR5655-p3	TRINITY_DN36297_c0_g1	TRINITY_DN36297_c0_g1	-	0	133-151	1
miR5655-p3	TRINITY_DN26465_c0_g1	TRINITY_DN26465_c0_g1	-	0.5	403-421	1
miR5655-p3	TRINITY_DN10339_c0_g1	TRINITY_DN10339_c0_g1	-	0.5	918-936	1
miR5655-p3	TRINITY_DN24766_c1_g1	TRINITY_DN24766_c1_g1	sp|Q9SU25|T2FA_ARATH Transcription initiation factor IIF subunit alpha OS=Arabidopsis thaliana GN=RAP74 PE=1 SV=1	0.5	1210-1228	1	GO:0009507(chloroplast);GO:0005634(nucleus);GO:0003824(catalytic activity);GO:0003677(DNA binding);GO:0008022(protein C-terminus binding);GO:0045893(positive regulation of transcription, DNA-dependent);GO:0006367(transcription initiation from RNA polymerase II promoter)	ko03022(Basal transcription factors)
miR5655-p3	TRINITY_DN21228_c0_g2	TRINITY_DN21228_c0_g2	-	1	46-64	1
miR5655-p3	TRINITY_DN21228_c0_g4	TRINITY_DN21228_c0_g4	-	1	46-64	1
miR5655-p3	TRINITY_DN21228_c0_g1	TRINITY_DN21228_c0_g1	sp|O15047|SET1A_HUMAN Histone-lysine N-methyltransferase SETD1A OS=Homo sapiens GN=SETD1A PE=1 SV=3	1	46-64	1	GO:0005694(chromosome);GO:0016607(nuclear speck);GO:0048188(Set1C/COMPASS complex);GO:0042800(histone methyltransferase activity );GO:0000166(nucleotide binding);GO:0005515(protein binding);GO:0003723(RNA binding);GO:0006355(regulation of transcription, DNA-dependent);GO:0006351(transcription, DNA-dependent)
miR5655-p3	TRINITY_DN21228_c0_g3	TRINITY_DN21228_c0_g3	-	1	46-64	1
miR5655-p3	TRINITY_DN33620_c0_g1	TRINITY_DN33620_c0_g1	-	1	20-38	1
miR5655-p3	TRINITY_DN33474_c0_g1	TRINITY_DN33474_c0_g1	-	1	268-286	1
miR5655-p3	TRINITY_DN18467_c0_g1	TRINITY_DN18467_c0_g1	sp|Q681X4|ZAT5_ARATH Zinc finger protein ZAT5 OS=Arabidopsis thaliana GN=ZAT5 PE=2 SV=1	1	912-930	1	GO:0005634(nucleus);GO:0003676(nucleic acid binding);GO:0008270(zinc ion binding);GO:0006355(regulation of transcription, DNA-dependent);GO:0006351(transcription, DNA-dependent)
miR5655-p3	TRINITY_DN21704_c0_g1	TRINITY_DN21704_c0_g1	sp|Q56X72|RTNLS_ARATH Reticulon-like protein B21 OS=Arabidopsis thaliana GN=RTNLB21 PE=2 SV=2	1	1838-1856	1	GO:0005789(endoplasmic reticulum membrane);GO:0016021(integral to membrane)
miR5655-p3	TRINITY_DN18284_c0_g1	TRINITY_DN18284_c0_g1	sp|Q9M7Q3|AI5L6_ARATH ABSCISIC ACID-INSENSITIVE 5-like protein 6 OS=Arabidopsis thaliana GN=ABF3 PE=1 SV=1	1	1293-1311	1	GO:0005634(nucleus);GO:0046983(protein dimerization activity);GO:0043565(sequence-specific DNA binding);GO:0003700(sequence-specific DNA binding transcription factor activity);GO:0009738(abscisic acid mediated signaling pathway);GO:0009651(response to salt stress);GO:0009414(response to water deprivation)
miR5655-p3	TRINITY_DN16534_c0_g1	TRINITY_DN16534_c0_g1	sp|Q94AH9|MD36A_ARATH Mediator of RNA polymerase II transcription subunit 36a OS=Arabidopsis thaliana GN=MED36A PE=1 SV=2	1	1054-1072	1	GO:0005730(nucleolus);GO:0030529(ribonucleoprotein complex);GO:0008168(methyltransferase activity);GO:0003723(RNA binding);GO:0001510(RNA methylation);GO:0006364(rRNA processing);GO:0008033(tRNA processing)
miR5655-p3	TRINITY_DN21678_c0_g1	TRINITY_DN21678_c0_g1	-	1	949-967	1
miR5655-p3	TRINITY_DN27789_c1_g2	TRINITY_DN27789_c1_g2	sp|O04425|FCA_ARATH Flowering time control protein FCA OS=Arabidopsis thaliana GN=FCA PE=1 SV=2	1	2921-2939	1	GO:0000785(chromatin);GO:0005634(nucleus);GO:0000166(nucleotide binding);GO:0003723(RNA binding);GO:0030154(cell differentiation);GO:0031048(chromatin silencing by small RNA);GO:0009790(embryo development);GO:0009553(embryo sac development);GO:0009908(flower development);GO:0009909(regulation of flower development)
miR5655-p3	TRINITY_DN30014_c1_g2	TRINITY_DN30014_c1_g2	-	1.5	270-288	1
miR5655-p3	TRINITY_DN32196_c0_g2	TRINITY_DN32196_c0_g2	-	1.5	89-107	1		ko00564(Glycerophospholipid metabolism)
miR5655-p3	TRINITY_DN22047_c0_g1	TRINITY_DN22047_c0_g1	-	1.5	1294-1312	1
miR5655-p3	TRINITY_DN20756_c0_g1	TRINITY_DN20756_c0_g1	sp|Q93WU6|WRK74_ARATH Probable WRKY transcription factor 74 OS=Arabidopsis thaliana GN=WRKY74 PE=2 SV=2	1.5	555-573	1	GO:0005634(nucleus);GO:0005516(calmodulin binding);GO:0043565(sequence-specific DNA binding);GO:0003700(sequence-specific DNA binding transcription factor activity)
miR5655-p3	TRINITY_DN5006_c0_g1	TRINITY_DN5006_c0_g1	sp|Q9FNR1|RBG3_ARATH Glycine-rich RNA-binding protein 3, mitochondrial OS=Arabidopsis thaliana GN=RBG3 PE=2 SV=1	1.5	724-742	1
miR5655-p3	TRINITY_DN32196_c0_g5	TRINITY_DN32196_c0_g5	-	1.5	89-107	1
miR5655-p3	TRINITY_DN25334_c1_g1	TRINITY_DN25334_c1_g1	-	1.5	745-763	1
miR5655-p3	TRINITY_DN19518_c0_g1	TRINITY_DN19518_c0_g1	sp|P92961|PROT1_ARATH Proline transporter 1 OS=Arabidopsis thaliana GN=PROT1 PE=1 SV=1	1.5	2305-2323	1
miR5655-p3	TRINITY_DN7803_c0_g1	TRINITY_DN7803_c0_g1	-	1.5	40-59	1
miR5655-p3	TRINITY_DN18799_c0_g1	TRINITY_DN18799_c0_g1	sp|Q38831|IAA13_ARATH Auxin-responsive protein IAA13 OS=Arabidopsis thaliana GN=IAA13 PE=1 SV=2	1.5	1174-1193	1	GO:0005634(nucleus);GO:0046983(protein dimerization activity);GO:0009734(auxin mediated signaling pathway);GO:0006355(regulation of transcription, DNA-dependent);GO:0006351(transcription, DNA-dependent)
miR5655-p3	TRINITY_DN28447_c0_g1	TRINITY_DN28447_c0_g1	sp|Q9LK03|PERK2_ARATH Proline-rich receptor-like protein kinase PERK2 OS=Arabidopsis thaliana GN=PERK2 PE=2 SV=3	1.5	773-791	1	GO:0016021(integral to membrane);GO:0005886(plasma membrane);GO:0005524(ATP binding);GO:0004674(protein serine/threonine kinase activity);GO:0004872(receptor activity)
miR5655-p3	TRINITY_DN27506_c0_g1	TRINITY_DN27506_c0_g1	sp|Q8LFA9|METL2_ARATH Methyltransferase-like protein 2 OS=Arabidopsis thaliana GN=At1g19340 PE=2 SV=2	1.5	2012-2030	1	GO:0008168(methyltransferase activity);GO:0003676(nucleic acid binding);GO:0006139(nucleobase, nucleoside, nucleotide and nucleic acid metabolic process)
miR5655-p3	TRINITY_DN19027_c0_g25	TRINITY_DN19027_c0_g25	-	1.5	10-28	1
miR5655-p3	TRINITY_DN19027_c0_g8	TRINITY_DN19027_c0_g8	-	1.5	10-28	1
miR5655-p3	TRINITY_DN19027_c0_g17	TRINITY_DN19027_c0_g17	-	1.5	10-28	1
miR5655-p3	TRINITY_DN19027_c0_g11	TRINITY_DN19027_c0_g11	-	1.5	10-28	1
miR5655-p3	TRINITY_DN19027_c0_g29	TRINITY_DN19027_c0_g29	-	1.5	10-28	1
miR5655-p3	TRINITY_DN19027_c0_g3	TRINITY_DN19027_c0_g3	-	1.5	10-28	1
miR5655-p3	TRINITY_DN19027_c0_g26	TRINITY_DN19027_c0_g26	-	1.5	10-28	1
miR5655-p3	TRINITY_DN19027_c0_g21	TRINITY_DN19027_c0_g21	-	1.5	10-28	1
miR5655-p3	TRINITY_DN19027_c0_g13	TRINITY_DN19027_c0_g13	sp|Q7G6K7|FH3_ORYSJ Formin-like protein 3 OS=Oryza sativa subsp. japonica GN=FH3 PE=2 SV=2	1.5	10-28	1	GO:0003779(actin binding);GO:0004721(phosphoprotein phosphatase activity);GO:0030036(actin cytoskeleton organization)
miR5655-p3	TRINITY_DN19027_c0_g15	TRINITY_DN19027_c0_g15	-	1.5	10-28	1
miR5655-p3	TRINITY_DN19027_c0_g18	TRINITY_DN19027_c0_g18	-	1.5	10-28	1
miR5655-p3	TRINITY_DN19027_c0_g12	TRINITY_DN19027_c0_g12	-	1.5	10-28	1
miR5655-p3	TRINITY_DN19027_c0_g6	TRINITY_DN19027_c0_g6	-	1.5	10-28	1
miR5655-p3	TRINITY_DN19027_c0_g23	TRINITY_DN19027_c0_g23	-	1.5	10-28	1
miR5655-p3	TRINITY_DN19027_c0_g9	TRINITY_DN19027_c0_g9	-	1.5	10-28	1
miR5655-p3	TRINITY_DN19027_c0_g10	TRINITY_DN19027_c0_g10	-	1.5	10-28	1
miR5655-p3	TRINITY_DN19027_c0_g2	TRINITY_DN19027_c0_g2	-	1.5	10-28	1
miR5655-p3	TRINITY_DN19027_c0_g1	TRINITY_DN19027_c0_g1	-	1.5	10-28	1
miR5655-p3	TRINITY_DN19027_c0_g5	TRINITY_DN19027_c0_g5	-	1.5	10-28	1
miR5655-p3	TRINITY_DN19027_c0_g14	TRINITY_DN19027_c0_g14	-	1.5	10-28	1
miR5655-p3	TRINITY_DN19027_c0_g24	TRINITY_DN19027_c0_g24	-	1.5	10-28	1
miR5655-p3	TRINITY_DN19027_c0_g7	TRINITY_DN19027_c0_g7	-	1.5	10-28	1
miR5655-p3	TRINITY_DN19027_c0_g16	TRINITY_DN19027_c0_g16	-	1.5	10-28	1
miR5655-p3	TRINITY_DN11403_c0_g1	TRINITY_DN11403_c0_g1	sp|Q41188|CSP2_ARATH Cold shock protein 2 OS=Arabidopsis thaliana GN=CSP2 PE=1 SV=1	1.5	593-611	1
miR5655-p3	TRINITY_DN19488_c0_g2	TRINITY_DN19488_c0_g2	sp|Q8W4R3|RH30_ARATH DEAD-box ATP-dependent RNA helicase 30 OS=Arabidopsis thaliana GN=RH30 PE=2 SV=2	1.5	2764-2782	1	GO:0005634(nucleus);GO:0005524(ATP binding);GO:0008026(ATP-dependent helicase activity);GO:0003723(RNA binding);GO:0000184(nuclear-transcribed mRNA catabolic process, nonsense-mediated decay);GO:0006364(rRNA processing)
miR5655-p3	TRINITY_DN13866_c0_g1	TRINITY_DN13866_c0_g1	-	2	181-199	1
miR5655-p3	TRINITY_DN48124_c0_g1	TRINITY_DN48124_c0_g1	-	2	8-26	1
miR5655-p3	TRINITY_DN42302_c0_g1	TRINITY_DN42302_c0_g1	-	2	45-63	1
miR5655-p3	TRINITY_DN19027_c0_g25	TRINITY_DN19027_c0_g25	-	2	34-52	1
miR5655-p3	TRINITY_DN19027_c0_g8	TRINITY_DN19027_c0_g8	-	2	34-52	1
miR5655-p3	TRINITY_DN19027_c0_g17	TRINITY_DN19027_c0_g17	-	2	34-52	1
miR5655-p3	TRINITY_DN19027_c0_g11	TRINITY_DN19027_c0_g11	-	2	34-52	1
miR5655-p3	TRINITY_DN19027_c0_g29	TRINITY_DN19027_c0_g29	-	2	34-52	1
miR5655-p3	TRINITY_DN19027_c0_g3	TRINITY_DN19027_c0_g3	-	2	34-52	1
miR5655-p3	TRINITY_DN19027_c0_g26	TRINITY_DN19027_c0_g26	-	2	34-52	1
miR5655-p3	TRINITY_DN19027_c0_g21	TRINITY_DN19027_c0_g21	-	2	34-52	1
miR5655-p3	TRINITY_DN19027_c0_g13	TRINITY_DN19027_c0_g13	sp|Q7G6K7|FH3_ORYSJ Formin-like protein 3 OS=Oryza sativa subsp. japonica GN=FH3 PE=2 SV=2	2	34-52	1	GO:0003779(actin binding);GO:0004721(phosphoprotein phosphatase activity);GO:0030036(actin cytoskeleton organization)
miR5655-p3	TRINITY_DN19027_c0_g15	TRINITY_DN19027_c0_g15	-	2	34-52	1
miR5655-p3	TRINITY_DN19027_c0_g18	TRINITY_DN19027_c0_g18	-	2	34-52	1
miR5655-p3	TRINITY_DN19027_c0_g6	TRINITY_DN19027_c0_g6	-	2	34-52	1
miR5655-p3	TRINITY_DN19027_c0_g12	TRINITY_DN19027_c0_g12	-	2	34-52	1
miR5655-p3	TRINITY_DN19027_c0_g23	TRINITY_DN19027_c0_g23	-	2	34-52	1
miR5655-p3	TRINITY_DN19027_c0_g9	TRINITY_DN19027_c0_g9	-	2	34-52	1
miR5655-p3	TRINITY_DN19027_c0_g10	TRINITY_DN19027_c0_g10	-	2	34-52	1
miR5655-p3	TRINITY_DN19027_c0_g2	TRINITY_DN19027_c0_g2	-	2	34-52	1
miR5655-p3	TRINITY_DN19027_c0_g1	TRINITY_DN19027_c0_g1	-	2	34-52	1
miR5655-p3	TRINITY_DN24840_c0_g1	TRINITY_DN24840_c0_g1	sp|Q39008|M3K1_ARATH Mitogen-activated protein kinase kinase kinase 1 OS=Arabidopsis thaliana GN=MEKK1 PE=1 SV=2	2	328-346	1	GO:0005634(nucleus);GO:0005524(ATP binding);GO:0003677(DNA binding);GO:0019900(kinase binding);GO:0004709(MAP kinase kinase kinase activity);GO:0000165(MAPKKK cascade);GO:0046777(protein autophosphorylation);GO:0009409(response to cold);GO:0009651(response to salt stress);GO:0009611(response to wounding)
miR5655-p3	TRINITY_DN15386_c0_g1	TRINITY_DN15386_c0_g1	-	2	835-853	1
miR5655-p3	TRINITY_DN19027_c0_g5	TRINITY_DN19027_c0_g5	-	2	34-52	1
miR5655-p3	TRINITY_DN11403_c0_g1	TRINITY_DN11403_c0_g1	sp|Q41188|CSP2_ARATH Cold shock protein 2 OS=Arabidopsis thaliana GN=CSP2 PE=1 SV=1	2	731-749	1
miR5655-p3	TRINITY_DN19027_c0_g14	TRINITY_DN19027_c0_g14	-	2	34-52	1
miR5655-p3	TRINITY_DN19027_c0_g24	TRINITY_DN19027_c0_g24	-	2	34-52	1
miR5655-p3	TRINITY_DN19027_c0_g7	TRINITY_DN19027_c0_g7	-	2	34-52	1
miR5655-p3	TRINITY_DN19027_c0_g16	TRINITY_DN19027_c0_g16	-	2	34-52	1
miR5655-p3	TRINITY_DN46816_c0_g1	TRINITY_DN46816_c0_g1	sp|C3ZWH9|CID2A_BRAFL CDGSH iron-sulfur domain-containing protein 2 homolog A OS=Branchiostoma floridae GN=BRAFLDRAFT_285975 PE=3 SV=1	2	231-250	1	GO:0005789(endoplasmic reticulum membrane);GO:0016021(integral to membrane);GO:0051537(2 iron, 2 sulfur cluster binding);GO:0046872(metal ion binding)
miR5655-p3	TRINITY_DN44799_c0_g1	TRINITY_DN44799_c0_g1	-	2	7-25	1
miR5655-p3	TRINITY_DN11808_c0_g1	TRINITY_DN11808_c0_g1	sp|P42525|ERK1_DICDI Extracellular signal-regulated kinase 1 OS=Dictyostelium discoideum GN=erkA PE=2 SV=2	2	312-330	1	GO:0005524(ATP binding);GO:0004707(MAP kinase activity);GO:0051301(cell division);GO:0007067(mitosis);GO:0030587(sorocarp development)
miR5655-p3	TRINITY_DN15381_c0_g1	TRINITY_DN15381_c0_g1	-	2	68-86	1
miR5655-p3	TRINITY_DN24621_c1_g1	TRINITY_DN24621_c1_g1	sp|Q92804|RBP56_HUMAN TATA-binding protein-associated factor 2N OS=Homo sapiens GN=TAF15 PE=1 SV=1	2	2593-2611	1	GO:0005737(cytoplasm);GO:0005634(nucleus);GO:0003677(DNA binding);GO:0000166(nucleotide binding);GO:0005515(protein binding);GO:0003723(RNA binding);GO:0008270(zinc ion binding);GO:0045893(positive regulation of transcription, DNA-dependent)
miR5655-p3	TRINITY_DN8445_c0_g1	TRINITY_DN8445_c0_g1	-	2	181-199	1
miR5655-p3	TRINITY_DN6298_c0_g2	TRINITY_DN6298_c0_g2	sp|Q9SX31|PERK9_ARATH Proline-rich receptor-like protein kinase PERK9 OS=Arabidopsis thaliana GN=PERK9 PE=2 SV=1	2	293-311	1	GO:0016021(integral to membrane);GO:0005886(plasma membrane);GO:0005524(ATP binding);GO:0004674(protein serine/threonine kinase activity)
miR5655-p3	TRINITY_DN19729_c0_g1	TRINITY_DN19729_c0_g1	-	2	918-936	1
miR5655-p3	TRINITY_DN33313_c0_g1	TRINITY_DN33313_c0_g1	-	2	296-314	1		ko03410(Base excision repair)
miR5655-p3	TRINITY_DN18128_c0_g1	TRINITY_DN18128_c0_g1	sp|Q9LV17|BH079_ARATH Transcription factor bHLH79 OS=Arabidopsis thaliana GN=BHLH79 PE=2 SV=1	2	1025-1043	1	GO:0005634(nucleus);GO:0003677(DNA binding);GO:0006355(regulation of transcription, DNA-dependent);GO:0006351(transcription, DNA-dependent)
miR5655-p3	TRINITY_DN27735_c0_g1	TRINITY_DN27735_c0_g1	sp|Q84W89|RH37_ARATH DEAD-box ATP-dependent RNA helicase 37 OS=Arabidopsis thaliana GN=RH37 PE=2 SV=2	2	828-846	1	GO:0005777(peroxisome);GO:0005524(ATP binding);GO:0008026(ATP-dependent helicase activity);GO:0003723(RNA binding)	ko04622(RIG-I-like receptor signaling pathway)
miR5655-p3	TRINITY_DN23679_c1_g1	TRINITY_DN23679_c1_g1	-	2	676-694	1
miR5655-p3	TRINITY_DN28990_c1_g2	TRINITY_DN28990_c1_g2	-	2	4896-4914	1
miR5655-p3	TRINITY_DN32357_c3_g1	TRINITY_DN32357_c3_g1	sp|C0LGQ9|Y4294_ARATH Probable LRR receptor-like serine/threonine-protein kinase At4g20940 OS=Arabidopsis thaliana GN=At4g20940 PE=1 SV=1	2	5493-5511	1	GO:0016021(integral to membrane);GO:0005886(plasma membrane);GO:0005524(ATP binding);GO:0004674(protein serine/threonine kinase activity);GO:0004872(receptor activity)
miR5655-p3	TRINITY_DN26483_c0_g1	TRINITY_DN26483_c0_g1	-	2	552-570	1
miR5655-p3	TRINITY_DN16534_c0_g1	TRINITY_DN16534_c0_g1	sp|Q94AH9|MD36A_ARATH Mediator of RNA polymerase II transcription subunit 36a OS=Arabidopsis thaliana GN=MED36A PE=1 SV=2	2	1129-1147	1	GO:0005730(nucleolus);GO:0030529(ribonucleoprotein complex);GO:0008168(methyltransferase activity);GO:0003723(RNA binding);GO:0001510(RNA methylation);GO:0006364(rRNA processing);GO:0008033(tRNA processing)
miR5655-p3	TRINITY_DN11403_c0_g1	TRINITY_DN11403_c0_g1	sp|Q41188|CSP2_ARATH Cold shock protein 2 OS=Arabidopsis thaliana GN=CSP2 PE=1 SV=1	2	788-806	1
miR5655-p3	TRINITY_DN3971_c0_g2	TRINITY_DN3971_c0_g2	-	2.5	918-936	1
miR5655-p3	TRINITY_DN6100_c0_g1	TRINITY_DN6100_c0_g1	-	2.5	706-724	1
miR5655-p3	TRINITY_DN9858_c0_g1	TRINITY_DN9858_c0_g1	-	2.5	399-417	1
miR5655-p3	TRINITY_DN30305_c0_g1	TRINITY_DN30305_c0_g1	sp|O48809|LRX2_ARATH Leucine-rich repeat extensin-like protein 2 OS=Arabidopsis thaliana GN=LRX2 PE=1 SV=1	2.5	366-384	1	GO:0005576(extracellular region);GO:0009505(plant-type cell wall);GO:0007047(cellular cell wall organization);GO:0007275(multicellular organismal development)
miR5655-p3	TRINITY_DN12484_c0_g1	TRINITY_DN12484_c0_g1	sp|Q9FKP8|Y5541_ARATH ZF-HD homeobox protein At5g65410 OS=Arabidopsis thaliana GN=At5g65410 PE=1 SV=1	2.5	1160-1178	1	GO:0005634(nucleus);GO:0003677(DNA binding);GO:0008270(zinc ion binding);GO:0006355(regulation of transcription, DNA-dependent);GO:0006351(transcription, DNA-dependent)
miR5655-p3	TRINITY_DN122_c0_g2	TRINITY_DN122_c0_g2	-	2.5	130-148	1
miR5655-p3	TRINITY_DN29041_c0_g1	TRINITY_DN29041_c0_g1	sp|Q84ZL0|FH5_ORYSJ Formin-like protein 5 OS=Oryza sativa subsp. japonica GN=FH5 PE=2 SV=2	2.5	1833-1851	1	GO:0003779(actin binding);GO:0004721(phosphoprotein phosphatase activity);GO:0030036(actin cytoskeleton organization)
miR5655-p3	TRINITY_DN7344_c0_g1	TRINITY_DN7344_c0_g1	sp|Q9SX31|PERK9_ARATH Proline-rich receptor-like protein kinase PERK9 OS=Arabidopsis thaliana GN=PERK9 PE=2 SV=1	2.5	6-24	1	GO:0016021(integral to membrane);GO:0005886(plasma membrane);GO:0005524(ATP binding);GO:0004674(protein serine/threonine kinase activity)
miR5655-p3	TRINITY_DN47935_c0_g1	TRINITY_DN47935_c0_g1	-	2.5	130-148	1		ko04112(Cell cycle - Caulobacter)
miR5655-p3	TRINITY_DN16458_c0_g1	TRINITY_DN16458_c0_g1	sp|Q946J8|LHP1_ARATH Chromo domain-containing protein LHP1 OS=Arabidopsis thaliana GN=LHP1 PE=1 SV=2	2.5	1450-1468	1	GO:0000791(euchromatin);GO:0005720(nuclear heterochromatin);GO:0003677(DNA binding);GO:0035064(methylated histone residue binding);GO:0030154(cell differentiation);GO:0016568(chromatin modification);GO:0006342(chromatin silencing);GO:0009908(flower development);GO:0009825(multidimensional cell growth);GO:0009910(negative regulation of flower development);GO:0045857(negative regulation of molecula…
miR5655-p3	TRINITY_DN20249_c0_g1	TRINITY_DN20249_c0_g1	sp|Q9C518|TCP8_ARATH Transcription factor TCP8 OS=Arabidopsis thaliana GN=TCP8 PE=2 SV=1	2.5	687-705	1	GO:0005634(nucleus);GO:0001047(core promoter binding);GO:0006355(regulation of transcription, DNA-dependent);GO:0006351(transcription, DNA-dependent)
miR5655-p3	TRINITY_DN122_c0_g1	TRINITY_DN122_c0_g1	-	2.5	733-751	1
miR5655-p3	TRINITY_DN19488_c0_g2	TRINITY_DN19488_c0_g2	sp|Q8W4R3|RH30_ARATH DEAD-box ATP-dependent RNA helicase 30 OS=Arabidopsis thaliana GN=RH30 PE=2 SV=2	2.5	2716-2734	1	GO:0005634(nucleus);GO:0005524(ATP binding);GO:0008026(ATP-dependent helicase activity);GO:0003723(RNA binding);GO:0000184(nuclear-transcribed mRNA catabolic process, nonsense-mediated decay);GO:0006364(rRNA processing)
miR5655-p3	TRINITY_DN27384_c1_g2	TRINITY_DN27384_c1_g2	-	2.5	64-81	1
miR5655-p3	TRINITY_DN22211_c0_g1	TRINITY_DN22211_c0_g1	sp|Q9SYM1|MSL6_ARATH Mechanosensitive ion channel protein 6 OS=Arabidopsis thaliana GN=MSL6 PE=1 SV=1	2.5	2714-2732	1	GO:0016021(integral to membrane);GO:0005886(plasma membrane);GO:0009506(plasmodesma);GO:0005774(vacuolar membrane);GO:0055085(transmembrane transport)
miR5655-p3	TRINITY_DN32461_c0_g1	TRINITY_DN32461_c0_g1	-	2.5	2644-2662	1
miR5655-p3	TRINITY_DN32715_c0_g3	TRINITY_DN32715_c0_g3	-	2.5	203-221	1
miR5655-p3	TRINITY_DN32644_c0_g1	TRINITY_DN32644_c0_g1	-	2.5	1683-1701	1
miR5655-p3	TRINITY_DN32715_c0_g2	TRINITY_DN32715_c0_g2	-	2.5	203-221	1
miR5655-p3	TRINITY_DN30478_c0_g1	TRINITY_DN30478_c0_g1	sp|Q9SZ52|PP344_ARATH Pentatricopeptide repeat-containing protein At4g31850, chloroplastic OS=Arabidopsis thaliana GN=PGR3 PE=1 SV=1	2.5	3559-3577	1	GO:0009507(chloroplast);GO:0005488(binding)
miR5655-p3	TRINITY_DN25093_c0_g1	TRINITY_DN25093_c0_g1	sp|Q39203|SD22_ARATH G-type lectin S-receptor-like serine/threonine-protein kinase SD2-2 OS=Arabidopsis thaliana GN=SD22 PE=1 SV=1	2.5	792-810	1	GO:0016021(integral to membrane);GO:0044459(plasma membrane part);GO:0005524(ATP binding);GO:0005516(calmodulin binding);GO:0004674(protein serine/threonine kinase activity);GO:0004872(receptor activity);GO:0005529(sugar binding);GO:0048544(recognition of pollen)
miR5655-p3	TRINITY_DN29168_c2_g4	TRINITY_DN29168_c2_g4	sp|Q2QD30|YCF2_CUCSA Protein ycf2 OS=Cucumis sativus GN=ycf2-A PE=3 SV=1	2.5	4532-4550	1	GO:0009570(chloroplast stroma);GO:0005524(ATP binding);GO:0017111(nucleoside-triphosphatase activity)
miR5655-p3	TRINITY_DN25699_c1_g1	TRINITY_DN25699_c1_g1	sp|B7KEJ8|DNAJ_CYAP7 Chaperone protein DnaJ OS=Cyanothece sp. (strain PCC 7424) GN=dnaJ PE=3 SV=1	2.5	2787-2805	1	GO:0005737(cytoplasm);GO:0005524(ATP binding);GO:0031072(heat shock protein binding);GO:0046872(metal ion binding);GO:0051082(unfolded protein binding);GO:0006260(DNA replication);GO:0006457(protein folding);GO:0009408(response to heat)
miR5655-p3	TRINITY_DN28896_c0_g1	TRINITY_DN28896_c0_g1	-	2.5	1494-1512	1
miR5655-p3	TRINITY_DN26488_c0_g2	TRINITY_DN26488_c0_g2	sp|Q2VZE7|APAG_MAGSA Protein ApaG OS=Magnetospirillum magneticum (strain AMB-1 / ATCC 700264) GN=apaG PE=3 SV=1	2.5	983-1000	1
miR5655-p3	TRINITY_DN34222_c0_g1	TRINITY_DN34222_c0_g1	sp|Q40588|ASO_TOBAC L-ascorbate oxidase OS=Nicotiana tabacum GN=AAO PE=2 SV=1	2.5	939-957	1	GO:0005576(extracellular region);GO:0005507(copper ion binding);GO:0008447(L-ascorbate oxidase activity)	ko00053(Ascorbate and aldarate metabolism)
miR5655-p3	TRINITY_DN26919_c0_g1	TRINITY_DN26919_c0_g1	sp|Q9LDD4|ARID2_ARATH AT-rich interactive domain-containing protein 2 OS=Arabidopsis thaliana GN=ARID2 PE=2 SV=1	2.5	357-375	1	GO:0005773(vacuole);GO:0003677(DNA binding)
miR5655-p3	TRINITY_DN27384_c1_g3	TRINITY_DN27384_c1_g3	sp|Q9LUS2|TC120_ARATH Translocase of chloroplast 120, chloroplastic OS=Arabidopsis thaliana GN=TOC120 PE=1 SV=1	2.5	64-81	1	GO:0009707(chloroplast outer membrane);GO:0016021(integral to membrane);GO:0005525(GTP binding);GO:0016817(hydrolase activity, acting on acid anhydrides);GO:0046872(metal ion binding);GO:0004872(receptor activity);GO:0045036(protein targeting to chloroplast)
miR5655-p3	TRINITY_DN50220_c0_g1	TRINITY_DN50220_c0_g1	-	2.5	72-90	1
miR5655-p3	TRINITY_DN30988_c0_g2	TRINITY_DN30988_c0_g2	sp|O49743|GATA4_ARATH GATA transcription factor 4 OS=Arabidopsis thaliana GN=GATA4 PE=2 SV=1	3	434-452	1	GO:0005634(nucleus);GO:0043565(sequence-specific DNA binding);GO:0003700(sequence-specific DNA binding transcription factor activity);GO:0008270(zinc ion binding);GO:0045893(positive regulation of transcription, DNA-dependent);GO:0009416(response to light stimulus)
miR5655-p3	TRINITY_DN30988_c0_g1	TRINITY_DN30988_c0_g1	sp|O49743|GATA4_ARATH GATA transcription factor 4 OS=Arabidopsis thaliana GN=GATA4 PE=2 SV=1	3	448-466	1	GO:0005634(nucleus);GO:0043565(sequence-specific DNA binding);GO:0003700(sequence-specific DNA binding transcription factor activity);GO:0008270(zinc ion binding);GO:0045893(positive regulation of transcription, DNA-dependent);GO:0009416(response to light stimulus)
miR5655-p3	TRINITY_DN22827_c0_g1	TRINITY_DN22827_c0_g1	sp|Q6AWY4|GRF5_ORYSJ Growth-regulating factor 5 OS=Oryza sativa subsp. japonica GN=GRF5 PE=2 SV=1	3	1236-1254	1
miR5655-p3	TRINITY_DN19742_c0_g1	TRINITY_DN19742_c0_g1	-	3	423-441	1
miR5655-p3	TRINITY_DN15009_c0_g1	TRINITY_DN15009_c0_g1	sp|Q9SS80|U503A_ARATH UPF0503 protein At3g09070, chloroplastic OS=Arabidopsis thaliana GN=At3g09070 PE=1 SV=1	3	307-325	1	GO:0009507(chloroplast);GO:0005886(plasma membrane)
miR5655-p3	TRINITY_DN19742_c0_g2	TRINITY_DN19742_c0_g2	-	3	429-447	1
miR5655-p3	TRINITY_DN50220_c0_g1	TRINITY_DN50220_c0_g1	-	3	186-204	1
miR5655-p3	TRINITY_DN14961_c0_g2	TRINITY_DN14961_c0_g2	-	3	23-41	1
miR5655-p3	TRINITY_DN14961_c0_g3	TRINITY_DN14961_c0_g3	-	3	23-41	1
miR5655-p3	TRINITY_DN14961_c0_g1	TRINITY_DN14961_c0_g1	-	3	27-45	1
miR5655-p3	TRINITY_DN23720_c1_g2	TRINITY_DN23720_c1_g2	sp|Q9LYG9|MSL10_ARATH Mechanosensitive ion channel protein 10 OS=Arabidopsis thaliana GN=MSL10 PE=1 SV=1	3	510-528	1	GO:0016021(integral to membrane);GO:0005886(plasma membrane);GO:0008381(mechanically-gated ion channel activity);GO:0050982(detection of mechanical stimulus)
miR5655-p3	TRINITY_DN23720_c1_g1	TRINITY_DN23720_c1_g1	sp|Q9LYG9|MSL10_ARATH Mechanosensitive ion channel protein 10 OS=Arabidopsis thaliana GN=MSL10 PE=1 SV=1	3	510-528	1	GO:0016021(integral to membrane);GO:0005886(plasma membrane);GO:0008381(mechanically-gated ion channel activity);GO:0050982(detection of mechanical stimulus)
miR5655-p3	TRINITY_DN27213_c0_g2	TRINITY_DN27213_c0_g2	-	3	585-603	1
miR5655-p3	TRINITY_DN1316_c0_g1	TRINITY_DN1316_c0_g1	-	3	65-83	1
miR5655-p3	TRINITY_DN19690_c0_g1	TRINITY_DN19690_c0_g1	sp|Q9C660|PEK10_ARATH Proline-rich receptor-like protein kinase PERK10 OS=Arabidopsis thaliana GN=PERK10 PE=1 SV=2	3	41-59	1	GO:0016021(integral to membrane);GO:0005886(plasma membrane);GO:0005524(ATP binding);GO:0004674(protein serine/threonine kinase activity)
miR5655-p3	TRINITY_DN5881_c0_g1	TRINITY_DN5881_c0_g1	-	3	201-219	1
miR5655-p3	TRINITY_DN29558_c0_g1	TRINITY_DN29558_c0_g1	-	3	686-704	1
miR5655-p3	TRINITY_DN5017_c0_g1	TRINITY_DN5017_c0_g1	-	3	30-48	1
miR5655-p3	TRINITY_DN5062_c0_g1	TRINITY_DN5062_c0_g1	-	3	285-303	1
miR5655-p3	TRINITY_DN14334_c0_g1	TRINITY_DN14334_c0_g1	-	3	661-679	1
miR5655-p3	TRINITY_DN14334_c0_g2	TRINITY_DN14334_c0_g2	sp|Q9LK03|PERK2_ARATH Proline-rich receptor-like protein kinase PERK2 OS=Arabidopsis thaliana GN=PERK2 PE=2 SV=3	3	661-679	1	GO:0016021(integral to membrane);GO:0005886(plasma membrane);GO:0005524(ATP binding);GO:0004674(protein serine/threonine kinase activity);GO:0004872(receptor activity)
miR5655-p3	TRINITY_DN644_c1_g2	TRINITY_DN644_c1_g2	-	3	750-768	1
miR5655-p3	TRINITY_DN30991_c0_g2	TRINITY_DN30991_c0_g2	-	3	979-997	1
miR5655-p3	TRINITY_DN47752_c0_g1	TRINITY_DN47752_c0_g1	-	3	34-52	1
miR5655-p3	TRINITY_DN32796_c0_g3	TRINITY_DN32796_c0_g3	sp|Q8L7S6|HEXO3_ARATH Beta-hexosaminidase 3 OS=Arabidopsis thaliana GN=HEXO3 PE=1 SV=1	3	1835-1853	1		ko00511(Other glycan degradation);ko00520(Amino sugar and nucleotide sugar metabolism);ko00531(Glycosaminoglycan degradation);ko00603(Glycosphingolipid biosynthesis - globo series);ko00604(Glycosphingolipid biosynthesis - ganglio series);ko04142(Lysosome)
miR5655-p3	TRINITY_DN9992_c0_g1	TRINITY_DN9992_c0_g1	sp|Q39013|NAC2_ARATH NAC domain-containing protein 2 OS=Arabidopsis thaliana GN=NAC002 PE=2 SV=2	3	709-727	1	GO:0005634(nucleus);GO:0003677(DNA binding);GO:0009788(negative regulation of abscisic acid mediated signaling pathway);GO:0006355(regulation of transcription, DNA-dependent);GO:0009611(response to wounding);GO:0006351(transcription, DNA-dependent)
miR5655-p3	TRINITY_DN10709_c0_g1	TRINITY_DN10709_c0_g1	-	3	381-399	1
miR5655-p3	TRINITY_DN22438_c0_g1	TRINITY_DN22438_c0_g1	sp|Q9LK03|PERK2_ARATH Proline-rich receptor-like protein kinase PERK2 OS=Arabidopsis thaliana GN=PERK2 PE=2 SV=3	3	102-120	1	GO:0016021(integral to membrane);GO:0005886(plasma membrane);GO:0005524(ATP binding);GO:0004674(protein serine/threonine kinase activity);GO:0004872(receptor activity)
miR5655-p3	TRINITY_DN22438_c0_g7	TRINITY_DN22438_c0_g7	sp|Q9LK03|PERK2_ARATH Proline-rich receptor-like protein kinase PERK2 OS=Arabidopsis thaliana GN=PERK2 PE=2 SV=3	3	105-123	1	GO:0016021(integral to membrane);GO:0005886(plasma membrane);GO:0005524(ATP binding);GO:0004674(protein serine/threonine kinase activity);GO:0004872(receptor activity)
miR5655-p3	TRINITY_DN32225_c2_g1	TRINITY_DN32225_c2_g1	sp|Q69UP6|AGO18_ORYSJ Protein argonaute 18 OS=Oryza sativa subsp. japonica GN=AGO18 PE=2 SV=1	3	158-176	1	GO:0003676(nucleic acid binding);GO:0031047(gene silencing by RNA)
miR5655-p3	TRINITY_DN2252_c0_g1	TRINITY_DN2252_c0_g1	-	3	491-509	1
miR5655-p3	TRINITY_DN2252_c0_g2	TRINITY_DN2252_c0_g2	-	3	491-509	1
miR5655-p3	TRINITY_DN24446_c0_g1	TRINITY_DN24446_c0_g1	sp|Q9FGT7|ARR18_ARATH Two-component response regulator ARR18 OS=Arabidopsis thaliana GN=ARR18 PE=2 SV=2	3	526-544	1	GO:0005634(nucleus);GO:0003677(DNA binding);GO:0000156(two-component response regulator activity);GO:0009736(cytokinin mediated signaling pathway);GO:0006355(regulation of transcription, DNA-dependent);GO:0006351(transcription, DNA-dependent)
miR5655-p3	TRINITY_DN42537_c0_g1	TRINITY_DN42537_c0_g1	sp|Q03251|RBG8_ARATH Glycine-rich RNA-binding protein 8 OS=Arabidopsis thaliana GN=RBG8 PE=1 SV=1	3	1074-1092	1	GO:0005618(cell wall);GO:0009507(chloroplast);GO:0005730(nucleolus);GO:0005777(peroxisome);GO:0005886(plasma membrane);GO:0009506(plasmodesma);GO:0000166(nucleotide binding);GO:0003723(RNA binding);GO:0045087(innate immune response);GO:0009737(response to abscisic acid stimulus);GO:0009409(response to cold);GO:0009651(response to salt stress);GO:0010043(response to zinc ion)
miR5655-p3	TRINITY_DN23720_c1_g3	TRINITY_DN23720_c1_g3	sp|Q9LYG9|MSL10_ARATH Mechanosensitive ion channel protein 10 OS=Arabidopsis thaliana GN=MSL10 PE=1 SV=1	3	510-528	1	GO:0016021(integral to membrane);GO:0005886(plasma membrane);GO:0008381(mechanically-gated ion channel activity);GO:0050982(detection of mechanical stimulus)
miR5655-p3	TRINITY_DN22438_c0_g5	TRINITY_DN22438_c0_g5	sp|O13936|SPT5_SCHPO Transcription elongation factor spt5 OS=Schizosaccharomyces pombe (strain 972 / ATCC 24843) GN=spt5 PE=1 SV=1	3	162-180	1	GO:0032044(DSIF complex);GO:0005515(protein binding);GO:0006397(mRNA processing);GO:0032968(positive regulation of transcription elongation from RNA polymerase II promoter);GO:0006351(transcription, DNA-dependent)
miR5655-p3	TRINITY_DN22438_c0_g9	TRINITY_DN22438_c0_g9	-	3	45-63	1
miR5655-p3	TRINITY_DN22438_c0_g6	TRINITY_DN22438_c0_g6	-	3	45-63	1
miR5655-p3	TRINITY_DN22438_c0_g4	TRINITY_DN22438_c0_g4	-	3	174-192	1
miR5655-p3	TRINITY_DN20899_c0_g1	TRINITY_DN20899_c0_g1	sp|Q9M2E2|SDR1_ARATH (+)-neomenthol dehydrogenase OS=Arabidopsis thaliana GN=SDR1 PE=1 SV=1	3	704-722	1	GO:0005829(cytosol);GO:0005886(plasma membrane);GO:0047501();GO:0047504();GO:0008106(alcohol dehydrogenase );GO:0005488(binding);GO:0006952(defense response);GO:0080167(response to karrikin)
miR5655-p3	TRINITY_DN22438_c0_g3	TRINITY_DN22438_c0_g3	-	3	45-63	1
miR5655-p3	TRINITY_DN22438_c0_g2	TRINITY_DN22438_c0_g2	-	3	45-63	1
miR5655-p3	TRINITY_DN11654_c0_g1	TRINITY_DN11654_c0_g1	-	3	920-938	1
miR5655-p3	TRINITY_DN32964_c4_g6	TRINITY_DN32964_c4_g6	sp|Q9FJW6|PP451_ARATH Pentatricopeptide repeat-containing protein At5g67570, chloroplastic OS=Arabidopsis thaliana GN=DG1 PE=1 SV=2	3	1433-1451	1	GO:0009507(chloroplast);GO:0005488(binding);GO:0009658(chloroplast organization)
miR5655-p3	TRINITY_DN26455_c0_g1	TRINITY_DN26455_c0_g1	sp|Q9LMX5|AFP2_ARATH Ninja-family protein AFP2 OS=Arabidopsis thaliana GN=AFP2 PE=1 SV=1	3	769-787	1	GO:0005634(nucleus);GO:0005515(protein binding);GO:0009737(response to abscisic acid stimulus);GO:0006950(response to stress)
miR5655-p3	TRINITY_DN51444_c0_g1	TRINITY_DN51444_c0_g1	-	3	81-99	1
miR5655-p3	TRINITY_DN41055_c0_g1	TRINITY_DN41055_c0_g1	sp|Q9ZWB4|3AT1_ARATH Coumaroyl-CoA:anthocyanidin 3-O-glucoside-6''-O-coumaroyltransferase 1 OS=Arabidopsis thaliana GN=3AT1 PE=1 SV=1	3	18-36	1
miR5655-p3	TRINITY_DN39732_c0_g1	TRINITY_DN39732_c0_g1	-	3	725-743	1
miR5655-p3	TRINITY_DN20632_c0_g1	TRINITY_DN20632_c0_g1	sp|Q94G86|ALL9_OLEEU Glucan endo-1,3-beta-D-glucosidase OS=Olea europaea GN=OLE9 PE=1 SV=1	3	595-613	1
miR5655-p3	TRINITY_DN46746_c0_g1	TRINITY_DN46746_c0_g1	sp|Q9SB61|Y4466_ARATH ZF-HD homeobox protein At4g24660 OS=Arabidopsis thaliana GN=At4g24660 PE=1 SV=1	3	638-656	1	GO:0005634(nucleus);GO:0003677(DNA binding);GO:0046872(metal ion binding);GO:0005515(protein binding);GO:0009793(embryo development ending in seed dormancy);GO:0006355(regulation of transcription, DNA-dependent);GO:0006351(transcription, DNA-dependent)
miR5655-p3	TRINITY_DN18225_c0_g1	TRINITY_DN18225_c0_g1	-	3	353-372	1
miR5655-p3	TRINITY_DN21094_c0_g1	TRINITY_DN21094_c0_g1	sp|Q39265|ZFP6_ARATH Zinc finger protein 6 OS=Arabidopsis thaliana GN=ZFP6 PE=2 SV=1	3	277-295	1	GO:0022626(cytosolic ribosome);GO:0003676(nucleic acid binding);GO:0008270(zinc ion binding);GO:0006355(regulation of transcription, DNA-dependent)
miR5655-p3	TRINITY_DN28089_c0_g1	TRINITY_DN28089_c0_g1	sp|Q9FYR7|SCL8_ARATH Scarecrow-like protein 8 OS=Arabidopsis thaliana GN=SCL8 PE=2 SV=1	3	502-520	1	GO:0005737(cytoplasm);GO:0005634(nucleus);GO:0006355(regulation of transcription, DNA-dependent);GO:0006351(transcription, DNA-dependent)
miR5655-p3	TRINITY_DN32448_c2_g1	TRINITY_DN32448_c2_g1	-	3	978-996	1
miR5655-p3	TRINITY_DN26282_c1_g1	TRINITY_DN26282_c1_g1	sp|Q9S709|U2AFA_ARATH Splicing factor U2af small subunit A OS=Arabidopsis thaliana GN=U2AF35A PE=1 SV=1	3	1684-1702	1	GO:0005634(nucleus);GO:0003677(DNA binding);GO:0000166(nucleotide binding);GO:0003723(RNA binding);GO:0008270(zinc ion binding);GO:0006397(mRNA processing);GO:0048573(photoperiodism, flowering);GO:0008380(RNA splicing)
miR5655-p3	TRINITY_DN10709_c0_g2	TRINITY_DN10709_c0_g2	-	3	899-917	1
miR5655-p3	TRINITY_DN15434_c0_g1	TRINITY_DN15434_c0_g1	sp|Q05860|FMN1_MOUSE Formin-1 OS=Mus musculus GN=Fmn1 PE=1 SV=2	3	66-84	1	GO:0015629(actin cytoskeleton);GO:0005912(adherens junction);GO:0005737(cytoplasm);GO:0005634(nucleus);GO:0005886(plasma membrane);GO:0003779(actin binding);GO:0003677(DNA binding);GO:0017124(SH3 domain binding);GO:0030036(actin cytoskeleton organization);GO:0035136(forelimb morphogenesis);GO:0010467(gene expression);GO:0035137(hindlimb morphogenesis);GO:0030838(positive regulation of actin filam…
miR5655-p3	TRINITY_DN30078_c0_g1	TRINITY_DN30078_c0_g1	sp|Q9LTT9|VCR_ARATH Varicose-related protein OS=Arabidopsis thaliana GN=VCR PE=2 SV=1	3	4413-4431	1
miR5655-p3	TRINITY_DN25224_c0_g6	TRINITY_DN25224_c0_g6	-	3	733-752	1
miR5655-p3	TRINITY_DN15434_c2_g1	TRINITY_DN15434_c2_g1	sp|Q9LHF1|LRX4_ARATH Leucine-rich repeat extensin-like protein 4 OS=Arabidopsis thaliana GN=LRX4 PE=1 SV=1	3	1346-1364	1	GO:0005576(extracellular region);GO:0009505(plant-type cell wall);GO:0009506(plasmodesma);GO:0007047(cellular cell wall organization)
miR5655-p3	TRINITY_DN22438_c0_g8	TRINITY_DN22438_c0_g8	sp|O13936|SPT5_SCHPO Transcription elongation factor spt5 OS=Schizosaccharomyces pombe (strain 972 / ATCC 24843) GN=spt5 PE=1 SV=1	3	696-714	1	GO:0032044(DSIF complex);GO:0005515(protein binding);GO:0006397(mRNA processing);GO:0032968(positive regulation of transcription elongation from RNA polymerase II promoter);GO:0006351(transcription, DNA-dependent)
miR5655-p3	TRINITY_DN32312_c0_g1	TRINITY_DN32312_c0_g1	sp|Q8H0T4|UPL2_ARATH E3 ubiquitin-protein ligase UPL2 OS=Arabidopsis thaliana GN=UPL2 PE=1 SV=3	3	13024-13042	1	GO:0005829(cytosol);GO:0005739(mitochondrion);GO:0005634(nucleus);GO:0016881(acid-amino acid ligase activity);GO:0005488(binding);GO:0006464(protein modification process)	ko04120(Ubiquitin mediated proteolysis)
miR5655-p3	TRINITY_DN24662_c0_g1	TRINITY_DN24662_c0_g1	-	3	507-525	1
miR5655-p3	TRINITY_DN19739_c0_g1	TRINITY_DN19739_c0_g1	sp|Q9ZV33|DOF22_ARATH Dof zinc finger protein DOF2.2 OS=Arabidopsis thaliana GN=DOF2.2 PE=2 SV=2	3	1221-1239	1	GO:0005634(nucleus);GO:0003677(DNA binding);GO:0008270(zinc ion binding);GO:0006355(regulation of transcription, DNA-dependent);GO:0006351(transcription, DNA-dependent)
miR5655-p3	TRINITY_DN24990_c1_g3	TRINITY_DN24990_c1_g3	sp|Q9H0Z9|RBM38_HUMAN RNA-binding protein 38 OS=Homo sapiens GN=RBM38 PE=1 SV=2	3	131-150	1	GO:0005829(cytosol);GO:0005634(nucleus);GO:0003730(mRNA 3'-UTR binding);GO:0003729(mRNA binding);GO:0000166(nucleotide binding);GO:0070935(3'-UTR-mediated mRNA stabilization);GO:0007049(cell cycle);GO:0007050(cell cycle arrest);GO:0030154(cell differentiation);GO:0006977(DNA damage response, signal transduction by p53 class mediator resulting in cell cycle arrest);GO:0006978(DNA damage response, …
miR5655-p3	TRINITY_DN24990_c1_g6	TRINITY_DN24990_c1_g6	sp|Q9H0Z9|RBM38_HUMAN RNA-binding protein 38 OS=Homo sapiens GN=RBM38 PE=1 SV=2	3	131-150	1	GO:0005829(cytosol);GO:0005634(nucleus);GO:0003730(mRNA 3'-UTR binding);GO:0003729(mRNA binding);GO:0000166(nucleotide binding);GO:0070935(3'-UTR-mediated mRNA stabilization);GO:0007049(cell cycle);GO:0007050(cell cycle arrest);GO:0030154(cell differentiation);GO:0006977(DNA damage response, signal transduction by p53 class mediator resulting in cell cycle arrest);GO:0006978(DNA damage response, …
miR5655-p3	TRINITY_DN31782_c0_g9	TRINITY_DN31782_c0_g9	sp|Q9SD53|Y3720_ARATH UPF0481 protein At3g47200 OS=Arabidopsis thaliana GN=At3g47200 PE=1 SV=1	3	232-250	1	GO:0016021(integral to membrane);GO:0005886(plasma membrane)
miR5655-p3	TRINITY_DN19808_c0_g1	TRINITY_DN19808_c0_g1	sp|O48963|PHOT1_ARATH Phototropin-1 OS=Arabidopsis thaliana GN=PHOT1 PE=1 SV=1	3	2295-2313	1	GO:0009898(internal side of plasma membrane);GO:0005773(vacuole);GO:0005524(ATP binding);GO:0009882(blue light photoreceptor activity);GO:0010181(FMN binding);GO:0042802(identical protein binding);GO:0004674(protein serine/threonine kinase activity);GO:0000155(two-component sensor activity);GO:0009904(chloroplast accumulation movement);GO:0009903(chloroplast avoidance movement);GO:0010362(negativ…
miR5655-p3	TRINITY_DN24990_c1_g8	TRINITY_DN24990_c1_g8	sp|Q9H0Z9|RBM38_HUMAN RNA-binding protein 38 OS=Homo sapiens GN=RBM38 PE=1 SV=2	3	131-150	1	GO:0005829(cytosol);GO:0005634(nucleus);GO:0003730(mRNA 3'-UTR binding);GO:0003729(mRNA binding);GO:0000166(nucleotide binding);GO:0070935(3'-UTR-mediated mRNA stabilization);GO:0007049(cell cycle);GO:0007050(cell cycle arrest);GO:0030154(cell differentiation);GO:0006977(DNA damage response, signal transduction by p53 class mediator resulting in cell cycle arrest);GO:0006978(DNA damage response, …
miR5655-p3	TRINITY_DN24990_c1_g12	TRINITY_DN24990_c1_g12	sp|Q9H0Z9|RBM38_HUMAN RNA-binding protein 38 OS=Homo sapiens GN=RBM38 PE=1 SV=2	3	131-150	1	GO:0005829(cytosol);GO:0005634(nucleus);GO:0003730(mRNA 3'-UTR binding);GO:0003729(mRNA binding);GO:0000166(nucleotide binding);GO:0070935(3'-UTR-mediated mRNA stabilization);GO:0007049(cell cycle);GO:0007050(cell cycle arrest);GO:0030154(cell differentiation);GO:0006977(DNA damage response, signal transduction by p53 class mediator resulting in cell cycle arrest);GO:0006978(DNA damage response, …
miR5655-p3	TRINITY_DN24990_c1_g5	TRINITY_DN24990_c1_g5	sp|Q9H0Z9|RBM38_HUMAN RNA-binding protein 38 OS=Homo sapiens GN=RBM38 PE=1 SV=2	3	131-150	1	GO:0005829(cytosol);GO:0005634(nucleus);GO:0003730(mRNA 3'-UTR binding);GO:0003729(mRNA binding);GO:0000166(nucleotide binding);GO:0070935(3'-UTR-mediated mRNA stabilization);GO:0007049(cell cycle);GO:0007050(cell cycle arrest);GO:0030154(cell differentiation);GO:0006977(DNA damage response, signal transduction by p53 class mediator resulting in cell cycle arrest);GO:0006978(DNA damage response, …
miR5655-p3	TRINITY_DN24990_c1_g7	TRINITY_DN24990_c1_g7	sp|Q9H0Z9|RBM38_HUMAN RNA-binding protein 38 OS=Homo sapiens GN=RBM38 PE=1 SV=2	3	131-150	1	GO:0005829(cytosol);GO:0005634(nucleus);GO:0003730(mRNA 3'-UTR binding);GO:0003729(mRNA binding);GO:0000166(nucleotide binding);GO:0070935(3'-UTR-mediated mRNA stabilization);GO:0007049(cell cycle);GO:0007050(cell cycle arrest);GO:0030154(cell differentiation);GO:0006977(DNA damage response, signal transduction by p53 class mediator resulting in cell cycle arrest);GO:0006978(DNA damage response, …
miR5655-p3	TRINITY_DN24990_c1_g4	TRINITY_DN24990_c1_g4	sp|Q9H0Z9|RBM38_HUMAN RNA-binding protein 38 OS=Homo sapiens GN=RBM38 PE=1 SV=2	3	131-150	1	GO:0005829(cytosol);GO:0005634(nucleus);GO:0003730(mRNA 3'-UTR binding);GO:0003729(mRNA binding);GO:0000166(nucleotide binding);GO:0070935(3'-UTR-mediated mRNA stabilization);GO:0007049(cell cycle);GO:0007050(cell cycle arrest);GO:0030154(cell differentiation);GO:0006977(DNA damage response, signal transduction by p53 class mediator resulting in cell cycle arrest);GO:0006978(DNA damage response, …
miR5655-p3	TRINITY_DN24990_c1_g2	TRINITY_DN24990_c1_g2	sp|Q9H0Z9|RBM38_HUMAN RNA-binding protein 38 OS=Homo sapiens GN=RBM38 PE=1 SV=2	3	131-150	1	GO:0005829(cytosol);GO:0005634(nucleus);GO:0003730(mRNA 3'-UTR binding);GO:0003729(mRNA binding);GO:0000166(nucleotide binding);GO:0070935(3'-UTR-mediated mRNA stabilization);GO:0007049(cell cycle);GO:0007050(cell cycle arrest);GO:0030154(cell differentiation);GO:0006977(DNA damage response, signal transduction by p53 class mediator resulting in cell cycle arrest);GO:0006978(DNA damage response, …
miR5655-p3	TRINITY_DN24990_c1_g10	TRINITY_DN24990_c1_g10	sp|Q9H0Z9|RBM38_HUMAN RNA-binding protein 38 OS=Homo sapiens GN=RBM38 PE=1 SV=2	3	131-150	1	GO:0005829(cytosol);GO:0005634(nucleus);GO:0003730(mRNA 3'-UTR binding);GO:0003729(mRNA binding);GO:0000166(nucleotide binding);GO:0070935(3'-UTR-mediated mRNA stabilization);GO:0007049(cell cycle);GO:0007050(cell cycle arrest);GO:0030154(cell differentiation);GO:0006977(DNA damage response, signal transduction by p53 class mediator resulting in cell cycle arrest);GO:0006978(DNA damage response, …
miR5655-p3	TRINITY_DN24990_c1_g9	TRINITY_DN24990_c1_g9	sp|Q9H0Z9|RBM38_HUMAN RNA-binding protein 38 OS=Homo sapiens GN=RBM38 PE=1 SV=2	3	131-150	1	GO:0005829(cytosol);GO:0005634(nucleus);GO:0003730(mRNA 3'-UTR binding);GO:0003729(mRNA binding);GO:0000166(nucleotide binding);GO:0070935(3'-UTR-mediated mRNA stabilization);GO:0007049(cell cycle);GO:0007050(cell cycle arrest);GO:0030154(cell differentiation);GO:0006977(DNA damage response, signal transduction by p53 class mediator resulting in cell cycle arrest);GO:0006978(DNA damage response, …
miR5655-p3	TRINITY_DN24990_c1_g1	TRINITY_DN24990_c1_g1	sp|Q9H0Z9|RBM38_HUMAN RNA-binding protein 38 OS=Homo sapiens GN=RBM38 PE=1 SV=2	3	131-150	1	GO:0005829(cytosol);GO:0005634(nucleus);GO:0003730(mRNA 3'-UTR binding);GO:0003729(mRNA binding);GO:0000166(nucleotide binding);GO:0070935(3'-UTR-mediated mRNA stabilization);GO:0007049(cell cycle);GO:0007050(cell cycle arrest);GO:0030154(cell differentiation);GO:0006977(DNA damage response, signal transduction by p53 class mediator resulting in cell cycle arrest);GO:0006978(DNA damage response, …
miR5655-p3	TRINITY_DN26927_c0_g2	TRINITY_DN26927_c0_g2	-	3	411-429	1
miR5655-p3	TRINITY_DN27213_c0_g1	TRINITY_DN27213_c0_g1	-	3	585-603	1
miR5655-p3	TRINITY_DN32502_c0_g1	TRINITY_DN32502_c0_g1	sp|P40340|TBP7_YEAST Tat-binding homolog 7 OS=Saccharomyces cerevisiae (strain ATCC 204508 / S288c) GN=YTA7 PE=1 SV=2	3	5332-5350	1	GO:0042406(extrinsic to endoplasmic reticulum membrane);GO:0005634(nucleus);GO:0005524(ATP binding);GO:0017111(nucleoside-triphosphatase activity);GO:0034613(cellular protein localization);GO:0045828(positive regulation of isoprenoid metabolic process);GO:0045944(positive regulation of transcription from RNA polymerase II promoter)
miR5655-p3	TRINITY_DN21863_c0_g1	TRINITY_DN21863_c0_g1	sp|Q9FFN2|GLYT3_ARATH Probable glycosyltransferase At5g03795 OS=Arabidopsis thaliana GN=At5g03795 PE=3 SV=2	3	1327-1346	1	GO:0000139(Golgi membrane);GO:0016021(integral to membrane);GO:0016757(transferase activity, transferring glycosyl groups);GO:0007047(cellular cell wall organization)
miR5655-p3	TRINITY_DN11068_c1_g13	TRINITY_DN11068_c1_g13	sp|Q39088|DOF34_ARATH Dof zinc finger protein DOF3.4 OS=Arabidopsis thaliana GN=DOF3.4 PE=1 SV=2	3	186-204	1	GO:0005634(nucleus);GO:0003677(DNA binding);GO:0005515(protein binding);GO:0008270(zinc ion binding);GO:0042545(cell wall modification);GO:0045787(positive regulation of cell cycle);GO:0045893(positive regulation of transcription, DNA-dependent);GO:0009733(response to auxin stimulus);GO:0009751(response to salicylic acid stimulus);GO:0006351(transcription, DNA-dependent)
miR5655-p3	TRINITY_DN11068_c1_g17	TRINITY_DN11068_c1_g17	sp|Q39088|DOF34_ARATH Dof zinc finger protein DOF3.4 OS=Arabidopsis thaliana GN=DOF3.4 PE=1 SV=2	3	167-185	1	GO:0005634(nucleus);GO:0003677(DNA binding);GO:0005515(protein binding);GO:0008270(zinc ion binding);GO:0042545(cell wall modification);GO:0045787(positive regulation of cell cycle);GO:0045893(positive regulation of transcription, DNA-dependent);GO:0009733(response to auxin stimulus);GO:0009751(response to salicylic acid stimulus);GO:0006351(transcription, DNA-dependent)
miR5655-p3	TRINITY_DN30743_c3_g1	TRINITY_DN30743_c3_g1	sp|Q93ZT6|IF4G1_ARATH Eukaryotic translation initiation factor isoform 4G-1 OS=Arabidopsis thaliana GN=EIF(ISO)4G1 PE=1 SV=1	3	2861-2879	1
miR5655-p3	TRINITY_DN32696_c1_g7	TRINITY_DN32696_c1_g7	sp|Q5XVF0|MEE12_ARATH TATA box-binding protein-associated factor RNA polymerase I subunit B OS=Arabidopsis thaliana GN=MEE12 PE=1 SV=1	3	2820-2838	1
miR5655-p3	TRINITY_DN11068_c1_g5	TRINITY_DN11068_c1_g5	sp|Q39088|DOF34_ARATH Dof zinc finger protein DOF3.4 OS=Arabidopsis thaliana GN=DOF3.4 PE=1 SV=2	3	167-185	1	GO:0005634(nucleus);GO:0003677(DNA binding);GO:0005515(protein binding);GO:0008270(zinc ion binding);GO:0042545(cell wall modification);GO:0045787(positive regulation of cell cycle);GO:0045893(positive regulation of transcription, DNA-dependent);GO:0009733(response to auxin stimulus);GO:0009751(response to salicylic acid stimulus);GO:0006351(transcription, DNA-dependent)
miR5655-p3	TRINITY_DN11068_c1_g19	TRINITY_DN11068_c1_g19	sp|Q39088|DOF34_ARATH Dof zinc finger protein DOF3.4 OS=Arabidopsis thaliana GN=DOF3.4 PE=1 SV=2	3	167-185	1	GO:0005634(nucleus);GO:0003677(DNA binding);GO:0005515(protein binding);GO:0008270(zinc ion binding);GO:0042545(cell wall modification);GO:0045787(positive regulation of cell cycle);GO:0045893(positive regulation of transcription, DNA-dependent);GO:0009733(response to auxin stimulus);GO:0009751(response to salicylic acid stimulus);GO:0006351(transcription, DNA-dependent)
miR5655-p3	TRINITY_DN11068_c1_g8	TRINITY_DN11068_c1_g8	sp|Q39088|DOF34_ARATH Dof zinc finger protein DOF3.4 OS=Arabidopsis thaliana GN=DOF3.4 PE=1 SV=2	3	167-185	1	GO:0005634(nucleus);GO:0003677(DNA binding);GO:0005515(protein binding);GO:0008270(zinc ion binding);GO:0042545(cell wall modification);GO:0045787(positive regulation of cell cycle);GO:0045893(positive regulation of transcription, DNA-dependent);GO:0009733(response to auxin stimulus);GO:0009751(response to salicylic acid stimulus);GO:0006351(transcription, DNA-dependent)
miR5655-p3	TRINITY_DN11068_c1_g2	TRINITY_DN11068_c1_g2	sp|Q39088|DOF34_ARATH Dof zinc finger protein DOF3.4 OS=Arabidopsis thaliana GN=DOF3.4 PE=1 SV=2	3	167-185	1	GO:0005634(nucleus);GO:0003677(DNA binding);GO:0005515(protein binding);GO:0008270(zinc ion binding);GO:0042545(cell wall modification);GO:0045787(positive regulation of cell cycle);GO:0045893(positive regulation of transcription, DNA-dependent);GO:0009733(response to auxin stimulus);GO:0009751(response to salicylic acid stimulus);GO:0006351(transcription, DNA-dependent)
miR5655-p3	TRINITY_DN11068_c1_g1	TRINITY_DN11068_c1_g1	sp|Q39088|DOF34_ARATH Dof zinc finger protein DOF3.4 OS=Arabidopsis thaliana GN=DOF3.4 PE=1 SV=2	3	167-185	1	GO:0005634(nucleus);GO:0003677(DNA binding);GO:0005515(protein binding);GO:0008270(zinc ion binding);GO:0042545(cell wall modification);GO:0045787(positive regulation of cell cycle);GO:0045893(positive regulation of transcription, DNA-dependent);GO:0009733(response to auxin stimulus);GO:0009751(response to salicylic acid stimulus);GO:0006351(transcription, DNA-dependent)
miR5655-p3	TRINITY_DN11068_c1_g3	TRINITY_DN11068_c1_g3	sp|Q39088|DOF34_ARATH Dof zinc finger protein DOF3.4 OS=Arabidopsis thaliana GN=DOF3.4 PE=1 SV=2	3	167-185	1	GO:0005634(nucleus);GO:0003677(DNA binding);GO:0005515(protein binding);GO:0008270(zinc ion binding);GO:0042545(cell wall modification);GO:0045787(positive regulation of cell cycle);GO:0045893(positive regulation of transcription, DNA-dependent);GO:0009733(response to auxin stimulus);GO:0009751(response to salicylic acid stimulus);GO:0006351(transcription, DNA-dependent)
miR5655-p3	TRINITY_DN11068_c1_g22	TRINITY_DN11068_c1_g22	sp|Q39088|DOF34_ARATH Dof zinc finger protein DOF3.4 OS=Arabidopsis thaliana GN=DOF3.4 PE=1 SV=2	3	167-185	1	GO:0005634(nucleus);GO:0003677(DNA binding);GO:0005515(protein binding);GO:0008270(zinc ion binding);GO:0042545(cell wall modification);GO:0045787(positive regulation of cell cycle);GO:0045893(positive regulation of transcription, DNA-dependent);GO:0009733(response to auxin stimulus);GO:0009751(response to salicylic acid stimulus);GO:0006351(transcription, DNA-dependent)
miR5655-p3	TRINITY_DN11068_c1_g6	TRINITY_DN11068_c1_g6	sp|Q39088|DOF34_ARATH Dof zinc finger protein DOF3.4 OS=Arabidopsis thaliana GN=DOF3.4 PE=1 SV=2	3	167-185	1	GO:0005634(nucleus);GO:0003677(DNA binding);GO:0005515(protein binding);GO:0008270(zinc ion binding);GO:0042545(cell wall modification);GO:0045787(positive regulation of cell cycle);GO:0045893(positive regulation of transcription, DNA-dependent);GO:0009733(response to auxin stimulus);GO:0009751(response to salicylic acid stimulus);GO:0006351(transcription, DNA-dependent)
miR5655-p3	TRINITY_DN11068_c1_g20	TRINITY_DN11068_c1_g20	sp|Q39088|DOF34_ARATH Dof zinc finger protein DOF3.4 OS=Arabidopsis thaliana GN=DOF3.4 PE=1 SV=2	3	167-185	1	GO:0005634(nucleus);GO:0003677(DNA binding);GO:0005515(protein binding);GO:0008270(zinc ion binding);GO:0042545(cell wall modification);GO:0045787(positive regulation of cell cycle);GO:0045893(positive regulation of transcription, DNA-dependent);GO:0009733(response to auxin stimulus);GO:0009751(response to salicylic acid stimulus);GO:0006351(transcription, DNA-dependent)
miR5655-p3	TRINITY_DN11068_c1_g11	TRINITY_DN11068_c1_g11	sp|Q39088|DOF34_ARATH Dof zinc finger protein DOF3.4 OS=Arabidopsis thaliana GN=DOF3.4 PE=1 SV=2	3	496-514	1	GO:0005634(nucleus);GO:0003677(DNA binding);GO:0005515(protein binding);GO:0008270(zinc ion binding);GO:0042545(cell wall modification);GO:0045787(positive regulation of cell cycle);GO:0045893(positive regulation of transcription, DNA-dependent);GO:0009733(response to auxin stimulus);GO:0009751(response to salicylic acid stimulus);GO:0006351(transcription, DNA-dependent)
miR5655-p3	TRINITY_DN11068_c1_g9	TRINITY_DN11068_c1_g9	sp|Q39088|DOF34_ARATH Dof zinc finger protein DOF3.4 OS=Arabidopsis thaliana GN=DOF3.4 PE=1 SV=2	3	497-515	1	GO:0005634(nucleus);GO:0003677(DNA binding);GO:0005515(protein binding);GO:0008270(zinc ion binding);GO:0042545(cell wall modification);GO:0045787(positive regulation of cell cycle);GO:0045893(positive regulation of transcription, DNA-dependent);GO:0009733(response to auxin stimulus);GO:0009751(response to salicylic acid stimulus);GO:0006351(transcription, DNA-dependent)
miR5655-p3	TRINITY_DN11068_c1_g15	TRINITY_DN11068_c1_g15	sp|Q39088|DOF34_ARATH Dof zinc finger protein DOF3.4 OS=Arabidopsis thaliana GN=DOF3.4 PE=1 SV=2	3	498-516	1	GO:0005634(nucleus);GO:0003677(DNA binding);GO:0005515(protein binding);GO:0008270(zinc ion binding);GO:0042545(cell wall modification);GO:0045787(positive regulation of cell cycle);GO:0045893(positive regulation of transcription, DNA-dependent);GO:0009733(response to auxin stimulus);GO:0009751(response to salicylic acid stimulus);GO:0006351(transcription, DNA-dependent)
miR5655-p3	TRINITY_DN11068_c1_g4	TRINITY_DN11068_c1_g4	sp|Q39088|DOF34_ARATH Dof zinc finger protein DOF3.4 OS=Arabidopsis thaliana GN=DOF3.4 PE=1 SV=2	3	500-518	1	GO:0005634(nucleus);GO:0003677(DNA binding);GO:0005515(protein binding);GO:0008270(zinc ion binding);GO:0042545(cell wall modification);GO:0045787(positive regulation of cell cycle);GO:0045893(positive regulation of transcription, DNA-dependent);GO:0009733(response to auxin stimulus);GO:0009751(response to salicylic acid stimulus);GO:0006351(transcription, DNA-dependent)
miR5655-p3	TRINITY_DN11068_c1_g21	TRINITY_DN11068_c1_g21	sp|Q39088|DOF34_ARATH Dof zinc finger protein DOF3.4 OS=Arabidopsis thaliana GN=DOF3.4 PE=1 SV=2	3	504-522	1	GO:0005634(nucleus);GO:0003677(DNA binding);GO:0005515(protein binding);GO:0008270(zinc ion binding);GO:0042545(cell wall modification);GO:0045787(positive regulation of cell cycle);GO:0045893(positive regulation of transcription, DNA-dependent);GO:0009733(response to auxin stimulus);GO:0009751(response to salicylic acid stimulus);GO:0006351(transcription, DNA-dependent)	ko03022(Basal transcription factors)
miR5655-p3	TRINITY_DN11068_c1_g10	TRINITY_DN11068_c1_g10	sp|Q39088|DOF34_ARATH Dof zinc finger protein DOF3.4 OS=Arabidopsis thaliana GN=DOF3.4 PE=1 SV=2	3	505-523	1	GO:0005634(nucleus);GO:0003677(DNA binding);GO:0005515(protein binding);GO:0008270(zinc ion binding);GO:0042545(cell wall modification);GO:0045787(positive regulation of cell cycle);GO:0045893(positive regulation of transcription, DNA-dependent);GO:0009733(response to auxin stimulus);GO:0009751(response to salicylic acid stimulus);GO:0006351(transcription, DNA-dependent)
miR5655-p3	TRINITY_DN11068_c1_g16	TRINITY_DN11068_c1_g16	sp|Q39088|DOF34_ARATH Dof zinc finger protein DOF3.4 OS=Arabidopsis thaliana GN=DOF3.4 PE=1 SV=2	3	506-524	1	GO:0005634(nucleus);GO:0003677(DNA binding);GO:0005515(protein binding);GO:0008270(zinc ion binding);GO:0042545(cell wall modification);GO:0045787(positive regulation of cell cycle);GO:0045893(positive regulation of transcription, DNA-dependent);GO:0009733(response to auxin stimulus);GO:0009751(response to salicylic acid stimulus);GO:0006351(transcription, DNA-dependent)
miR5655-p3	TRINITY_DN11068_c1_g7	TRINITY_DN11068_c1_g7	sp|Q39088|DOF34_ARATH Dof zinc finger protein DOF3.4 OS=Arabidopsis thaliana GN=DOF3.4 PE=1 SV=2	3	507-525	1	GO:0005634(nucleus);GO:0003677(DNA binding);GO:0005515(protein binding);GO:0008270(zinc ion binding);GO:0042545(cell wall modification);GO:0045787(positive regulation of cell cycle);GO:0045893(positive regulation of transcription, DNA-dependent);GO:0009733(response to auxin stimulus);GO:0009751(response to salicylic acid stimulus);GO:0006351(transcription, DNA-dependent)
miR5655-p3	TRINITY_DN11068_c1_g12	TRINITY_DN11068_c1_g12	sp|Q39088|DOF34_ARATH Dof zinc finger protein DOF3.4 OS=Arabidopsis thaliana GN=DOF3.4 PE=1 SV=2	3	508-526	1	GO:0005634(nucleus);GO:0003677(DNA binding);GO:0005515(protein binding);GO:0008270(zinc ion binding);GO:0042545(cell wall modification);GO:0045787(positive regulation of cell cycle);GO:0045893(positive regulation of transcription, DNA-dependent);GO:0009733(response to auxin stimulus);GO:0009751(response to salicylic acid stimulus);GO:0006351(transcription, DNA-dependent)
miR5655-p3	TRINITY_DN31496_c0_g1	TRINITY_DN31496_c0_g1	-	3	4419-4437	1
miR5655-p3	TRINITY_DN11068_c1_g14	TRINITY_DN11068_c1_g14	sp|Q39088|DOF34_ARATH Dof zinc finger protein DOF3.4 OS=Arabidopsis thaliana GN=DOF3.4 PE=1 SV=2	3	509-527	1	GO:0005634(nucleus);GO:0003677(DNA binding);GO:0005515(protein binding);GO:0008270(zinc ion binding);GO:0042545(cell wall modification);GO:0045787(positive regulation of cell cycle);GO:0045893(positive regulation of transcription, DNA-dependent);GO:0009733(response to auxin stimulus);GO:0009751(response to salicylic acid stimulus);GO:0006351(transcription, DNA-dependent)
miR5655-p3	TRINITY_DN14849_c0_g1	TRINITY_DN14849_c0_g1	sp|Q9LVQ0|PME31_ARATH Pectinesterase 31 OS=Arabidopsis thaliana GN=PME31 PE=1 SV=1	3	1327-1345	1	GO:0005618(cell wall);GO:0045330(aspartyl esterase activity);GO:0030599(pectinesterase activity);GO:0042545(cell wall modification);GO:0045488(pectin metabolic process)	ko00040(Pentose and glucuronate interconversions);ko00500(Starch and sucrose metabolism)
miR5655-p3	TRINITY_DN6787_c0_g1	TRINITY_DN6787_c0_g1	sp|Q9LK03|PERK2_ARATH Proline-rich receptor-like protein kinase PERK2 OS=Arabidopsis thaliana GN=PERK2 PE=2 SV=3	3	303-321	1	GO:0016021(integral to membrane);GO:0005886(plasma membrane);GO:0005524(ATP binding);GO:0004674(protein serine/threonine kinase activity);GO:0004872(receptor activity)
miR5655-p3	TRINITY_DN20240_c0_g3	TRINITY_DN20240_c0_g3	sp|Q93W34|RP45C_ARATH Polyadenylate-binding protein RBP45C OS=Arabidopsis thaliana GN=RBP45C PE=2 SV=1	3	546-564	1
miR5655-p3	TRINITY_DN16316_c0_g1	TRINITY_DN16316_c0_g1	sp|Q9SX31|PERK9_ARATH Proline-rich receptor-like protein kinase PERK9 OS=Arabidopsis thaliana GN=PERK9 PE=2 SV=1	3	1224-1242	1	GO:0016021(integral to membrane);GO:0005886(plasma membrane);GO:0005524(ATP binding);GO:0004674(protein serine/threonine kinase activity)
miR5655-p3	TRINITY_DN26157_c0_g1	TRINITY_DN26157_c0_g1	sp|F4JRF4|MUTYH_ARATH A/G-specific adenine DNA glycosylase OS=Arabidopsis thaliana GN=MYH PE=3 SV=1	3	1737-1755	1		ko03410(Base excision repair)
miR5655-p3	TRINITY_DN31482_c0_g1	TRINITY_DN31482_c0_g1	sp|Q9LMX4|PPA1_ARATH Probable inactive purple acid phosphatase 1 OS=Arabidopsis thaliana GN=PAP1 PE=2 SV=1	3	337-355	1	GO:0005576(extracellular region);GO:0003993(acid phosphatase activity);GO:0046872(metal ion binding)
miR5655-p3	TRINITY_DN16701_c0_g1	TRINITY_DN16701_c0_g1	sp|Q64FQ2|PID2_ARATH Protein kinase PINOID 2 OS=Arabidopsis thaliana GN=PID2 PE=1 SV=1	3	279-297	1	GO:0005524(ATP binding);GO:0005515(protein binding);GO:0004674(protein serine/threonine kinase activity);GO:0009734(auxin mediated signaling pathway);GO:0007275(multicellular organismal development)
miR5655-p3	TRINITY_DN16701_c0_g2	TRINITY_DN16701_c0_g2	sp|Q64FQ2|PID2_ARATH Protein kinase PINOID 2 OS=Arabidopsis thaliana GN=PID2 PE=1 SV=1	3	279-297	1	GO:0005524(ATP binding);GO:0005515(protein binding);GO:0004674(protein serine/threonine kinase activity);GO:0009734(auxin mediated signaling pathway);GO:0007275(multicellular organismal development)
miR5655-p3	TRINITY_DN28421_c2_g1	TRINITY_DN28421_c2_g1	sp|Q6PQQ3|AIL5_ARATH AP2-like ethylene-responsive transcription factor AIL5 OS=Arabidopsis thaliana GN=AIL5 PE=2 SV=2	3	546-564	1	GO:0005634(nucleus);GO:0003677(DNA binding);GO:0003700(sequence-specific DNA binding transcription factor activity);GO:0009873(ethylene mediated signaling pathway);GO:0040019(positive regulation of embryonic development);GO:0048364(root development);GO:0009845(seed germination)
miR5655-p3	TRINITY_DN47831_c0_g1	TRINITY_DN47831_c0_g1	sp|Q700W2|SPL9_ARATH Squamosa promoter-binding-like protein 9 OS=Arabidopsis thaliana GN=SPL9 PE=2 SV=2	3	213-232	1	GO:0005737(cytoplasm);GO:0005634(nucleus);GO:0003677(DNA binding);GO:0046872(metal ion binding);GO:0048366(leaf development);GO:2000025(regulation of leaf formation);GO:0006355(regulation of transcription, DNA-dependent);GO:0006351(transcription, DNA-dependent);GO:0010228(vegetative to reproductive phase transition of meristem)
miR5655-p3	TRINITY_DN19839_c0_g1	TRINITY_DN19839_c0_g1	sp|Q94JU2|WTR18_ARATH WAT1-related protein At3g28050 OS=Arabidopsis thaliana GN=At3g28050 PE=2 SV=1	3	1084-1102	1
miR5655-p3	TRINITY_DN24728_c0_g1	TRINITY_DN24728_c0_g1	sp|Q9M2U1|DOF36_ARATH Dof zinc finger protein DOF3.6 OS=Arabidopsis thaliana GN=DOF3.6 PE=1 SV=2	3	733-751	1	GO:0005634(nucleus);GO:0003677(DNA binding);GO:0003700(sequence-specific DNA binding transcription factor activity);GO:0008270(zinc ion binding);GO:0009640(photomorphogenesis);GO:0045893(positive regulation of transcription, DNA-dependent)
miR5655-p3	TRINITY_DN24990_c1_g11	TRINITY_DN24990_c1_g11	sp|Q5ZJX4|RBM38_CHICK RNA-binding protein 38 OS=Gallus gallus GN=RBM38 PE=2 SV=1	3	693-712	1	GO:0005829(cytosol);GO:0005634(nucleus);GO:0000166(nucleotide binding);GO:0030154(cell differentiation);GO:0006397(mRNA processing);GO:0008380(RNA splicing)
miR5655-p3	TRINITY_DN32959_c2_g5	TRINITY_DN32959_c2_g5	-	3	1096-1114	1
miR5655-p3	TRINITY_DN31862_c1_g1	TRINITY_DN31862_c1_g1	sp|Q8RV79|SOT11_ARATH Cytosolic sulfotransferase 11 OS=Arabidopsis thaliana GN=SOT11 PE=2 SV=1	3	815-833	1		ko00380(Tryptophan metabolism);ko00966(Glucosinolate biosynthesis)
miR5655-p3	TRINITY_DN13301_c0_g1	TRINITY_DN13301_c0_g1	sp|Q04960|DNJH_CUCSA DnaJ protein homolog OS=Cucumis sativus GN=DNAJ1 PE=2 SV=1	3	1204-1222	1	GO:0005886(plasma membrane);GO:0005524(ATP binding);GO:0031072(heat shock protein binding);GO:0046872(metal ion binding);GO:0051082(unfolded protein binding);GO:0006457(protein folding);GO:0009408(response to heat)
miR5655-p3	TRINITY_DN31501_c3_g2	TRINITY_DN31501_c3_g2	-	3	732-749	1
miR5655-p3	TRINITY_DN32326_c2_g4	TRINITY_DN32326_c2_g4	-	3	121-139	1
miR5655-p3	TRINITY_DN32326_c2_g3	TRINITY_DN32326_c2_g3	-	3	122-140	1
miR5655-p3	TRINITY_DN28447_c0_g1	TRINITY_DN28447_c0_g1	sp|Q9LK03|PERK2_ARATH Proline-rich receptor-like protein kinase PERK2 OS=Arabidopsis thaliana GN=PERK2 PE=2 SV=3	3	818-836	1	GO:0016021(integral to membrane);GO:0005886(plasma membrane);GO:0005524(ATP binding);GO:0004674(protein serine/threonine kinase activity);GO:0004872(receptor activity)
miR5655-p3	TRINITY_DN6298_c0_g2	TRINITY_DN6298_c0_g2	sp|Q9SX31|PERK9_ARATH Proline-rich receptor-like protein kinase PERK9 OS=Arabidopsis thaliana GN=PERK9 PE=2 SV=1	3	413-431	1	GO:0016021(integral to membrane);GO:0005886(plasma membrane);GO:0005524(ATP binding);GO:0004674(protein serine/threonine kinase activity)
miR5655-p3	TRINITY_DN32326_c2_g2	TRINITY_DN32326_c2_g2	-	3	1786-1804	1
miR5655-p3	TRINITY_DN29401_c0_g1	TRINITY_DN29401_c0_g1	-	3	357-375	1
miR5655-p3	TRINITY_DN29168_c2_g4	TRINITY_DN29168_c2_g4	sp|Q2QD30|YCF2_CUCSA Protein ycf2 OS=Cucumis sativus GN=ycf2-A PE=3 SV=1	3	3164-3182	1	GO:0009570(chloroplast stroma);GO:0005524(ATP binding);GO:0017111(nucleoside-triphosphatase activity)
miR5655-p3	TRINITY_DN28059_c0_g1	TRINITY_DN28059_c0_g1	-	3.5	4-22	1
miR5655-p3	TRINITY_DN14407_c0_g2	TRINITY_DN14407_c0_g2	sp|O65530|PEK14_ARATH Proline-rich receptor-like protein kinase PERK14 OS=Arabidopsis thaliana GN=PERK14 PE=2 SV=1	3.5	324-342	1	GO:0016021(integral to membrane);GO:0005886(plasma membrane);GO:0005524(ATP binding);GO:0004674(protein serine/threonine kinase activity)
miR5655-p3	TRINITY_DN14407_c0_g1	TRINITY_DN14407_c0_g1	sp|O65530|PEK14_ARATH Proline-rich receptor-like protein kinase PERK14 OS=Arabidopsis thaliana GN=PERK14 PE=2 SV=1	3.5	326-344	1	GO:0016021(integral to membrane);GO:0005886(plasma membrane);GO:0005524(ATP binding);GO:0004674(protein serine/threonine kinase activity)
miR5655-p3	TRINITY_DN32326_c2_g4	TRINITY_DN32326_c2_g4	-	3.5	178-196	1
miR5655-p3	TRINITY_DN32326_c2_g3	TRINITY_DN32326_c2_g3	-	3.5	179-197	1
miR5655-p3	TRINITY_DN4456_c0_g1	TRINITY_DN4456_c0_g1	-	3.5	310-328	1
miR5655-p3	TRINITY_DN4456_c0_g2	TRINITY_DN4456_c0_g2	-	3.5	310-328	1
miR5655-p3	TRINITY_DN2569_c0_g1	TRINITY_DN2569_c0_g1	-	3.5	281-299	1
miR5655-p3	TRINITY_DN42205_c0_g1	TRINITY_DN42205_c0_g1	-	3.5	126-144	1
miR5655-p3	TRINITY_DN19666_c0_g1	TRINITY_DN19666_c0_g1	sp|Q9FJ93|DRE1D_ARATH Dehydration-responsive element-binding protein 1D OS=Arabidopsis thaliana GN=DREB1D PE=2 SV=1	3.5	402-420	1	GO:0005634(nucleus);GO:0003677(DNA binding);GO:0003700(sequence-specific DNA binding transcription factor activity);GO:0009738(abscisic acid mediated signaling pathway);GO:0006950(response to stress)
miR5655-p3	TRINITY_DN27325_c1_g1	TRINITY_DN27325_c1_g1	sp|Q40477|ERF4_TOBAC Ethylene-responsive transcription factor 4 OS=Nicotiana tabacum GN=ERF4 PE=1 SV=1	3.5	636-654	1	GO:0005634(nucleus);GO:0003677(DNA binding);GO:0003700(sequence-specific DNA binding transcription factor activity);GO:0006952(defense response);GO:0009873(ethylene mediated signaling pathway)
miR5655-p3	TRINITY_DN45645_c0_g1	TRINITY_DN45645_c0_g1	sp|P34913|HYES_HUMAN Bifunctional epoxide hydrolase 2 OS=Homo sapiens GN=EPHX2 PE=1 SV=2	3.5	807-825	1	GO:0005829(cytosol);GO:0005925(focal adhesion);GO:0005794(Golgi apparatus);GO:0005730(nucleolus);GO:0005777(peroxisome);GO:0005625(soluble fraction);GO:0004301(epoxide hydrolase activity);GO:0046872(metal ion binding);GO:0042803(protein homodimerization activity);GO:0019439(aromatic compound catabolic process);GO:0006874(cellular calcium ion homeostasis);GO:0017144(drug metabolic process);GO:0006…
miR5655-p3	TRINITY_DN10108_c0_g1	TRINITY_DN10108_c0_g1	sp|Q9M0R0|BH081_ARATH Transcription factor bHLH81 OS=Arabidopsis thaliana GN=BHLH81 PE=2 SV=1	3.5	957-975	1	GO:0005634(nucleus);GO:0003677(DNA binding);GO:0006355(regulation of transcription, DNA-dependent);GO:0006351(transcription, DNA-dependent)
miR5655-p3	TRINITY_DN21986_c0_g2	TRINITY_DN21986_c0_g2	-	3.5	45-63	1
miR5655-p3	TRINITY_DN12615_c0_g1	TRINITY_DN12615_c0_g1	-	3.5	2013-2031	1
miR5655-p3	TRINITY_DN8130_c0_g1	TRINITY_DN8130_c0_g1	-	3.5	190-208	1
miR5655-p3	TRINITY_DN26513_c2_g1	TRINITY_DN26513_c2_g1	sp|Q9ZWQ8|PAP_CITUN Plastid-lipid-associated protein, chloroplastic OS=Citrus unshiu GN=PAP PE=2 SV=1	3.5	549-567	1	GO:0009507(chloroplast);GO:0005198(structural molecule activity)
miR5655-p3	TRINITY_DN18016_c0_g1	TRINITY_DN18016_c0_g1	sp|Q9LY00|WRK70_ARATH Probable WRKY transcription factor 70 OS=Arabidopsis thaliana GN=WRKY70 PE=2 SV=1	3.5	588-606	1	GO:0005634(nucleus);GO:0043565(sequence-specific DNA binding);GO:0003700(sequence-specific DNA binding transcription factor activity);GO:0050832(defense response to fungus);GO:0009864(induced systemic resistance, jasmonic acid mediated signaling pathway);GO:0045892(negative regulation of transcription, DNA-dependent);GO:0010200(response to chitin);GO:0009862(systemic acquired resistance, salicyli…
miR5655-p3	TRINITY_DN32606_c1_g2	TRINITY_DN32606_c1_g2	-	3.5	3237-3255	1
miR5655-p3	TRINITY_DN15227_c0_g1	TRINITY_DN15227_c0_g1	-	3.5	183-201	1
miR5655-p3	TRINITY_DN42800_c0_g1	TRINITY_DN42800_c0_g1	sp|P0CH30|RING1_GOSHI E3 ubiquitin-protein ligase RING1 OS=Gossypium hirsutum GN=RING1 PE=2 SV=1	3.5	438-456	1	GO:0016874(ligase activity);GO:0008270(zinc ion binding)
miR5655-p3	TRINITY_DN48991_c0_g1	TRINITY_DN48991_c0_g1	sp|Q9SB61|Y4466_ARATH ZF-HD homeobox protein At4g24660 OS=Arabidopsis thaliana GN=At4g24660 PE=1 SV=1	3.5	436-454	1	GO:0005634(nucleus);GO:0003677(DNA binding);GO:0046872(metal ion binding);GO:0005515(protein binding);GO:0009793(embryo development ending in seed dormancy);GO:0006355(regulation of transcription, DNA-dependent);GO:0006351(transcription, DNA-dependent)
miR5655-p3	TRINITY_DN12631_c0_g1	TRINITY_DN12631_c0_g1	sp|Q9ZWA6|MGP_ARATH Zinc finger protein MAGPIE OS=Arabidopsis thaliana GN=MGP PE=1 SV=1	3.5	348-366	1	GO:0005634(nucleus);GO:0003677(DNA binding);GO:0005515(protein binding);GO:0008270(zinc ion binding);GO:0006355(regulation of transcription, DNA-dependent);GO:0006351(transcription, DNA-dependent)
miR5655-p3	TRINITY_DN22977_c0_g1	TRINITY_DN22977_c0_g1	sp|Q41969|IF2B_ARATH Eukaryotic translation initiation factor 2 subunit beta OS=Arabidopsis thaliana GN=EMB1401 PE=2 SV=3	3.5	359-377	1	GO:0005886(plasma membrane);GO:0046872(metal ion binding);GO:0005515(protein binding);GO:0003743(translation initiation factor activity)
miR5655-p3	TRINITY_DN21986_c0_g3	TRINITY_DN21986_c0_g3	-	3.5	45-63	1
miR5655-p3	TRINITY_DN7487_c0_g1	TRINITY_DN7487_c0_g1	-	3.5	391-409	1
miR5655-p3	TRINITY_DN32326_c2_g2	TRINITY_DN32326_c2_g2	-	3.5	1843-1861	1
miR5655-p3	TRINITY_DN14080_c0_g1	TRINITY_DN14080_c0_g1	-	3.5	782-800	1
miR5655-p3	TRINITY_DN31134_c0_g1	TRINITY_DN31134_c0_g1	sp|Q10LN5|SWT16_ORYSJ Bidirectional sugar transporter SWEET16 OS=Oryza sativa subsp. japonica GN=SWEET16 PE=2 SV=1	3.5	373-391	1	GO:0005887(integral to plasma membrane);GO:0051119(sugar transmembrane transporter activity)
miR5655-p3	TRINITY_DN32606_c0_g1	TRINITY_DN32606_c0_g1	sp|O23310|NFYB3_ARATH Nuclear transcription factor Y subunit B-3 OS=Arabidopsis thaliana GN=NFYB3 PE=2 SV=1	3.5	333-351	1	GO:0005634(nucleus);GO:0043565(sequence-specific DNA binding);GO:0006355(regulation of transcription, DNA-dependent);GO:0006351(transcription, DNA-dependent)
miR5655-p3	TRINITY_DN32358_c1_g1	TRINITY_DN32358_c1_g1	sp|Q9STW6|HSP7F_ARATH Heat shock 70 kDa protein 6, chloroplastic OS=Arabidopsis thaliana GN=HSP70-6 PE=1 SV=1	3.5	2454-2472	1		ko03040(Spliceosome);ko04010(MAPK signaling pathway);ko04144(Endocytosis);ko04612(Antigen processing and presentation)
miR5655-p3	TRINITY_DN32885_c4_g4	TRINITY_DN32885_c4_g4	-	3.5	63-80	1
miR5655-p3	TRINITY_DN10668_c0_g1	TRINITY_DN10668_c0_g1	sp|Q9T0K5|LRX3_ARATH Leucine-rich repeat extensin-like protein 3 OS=Arabidopsis thaliana GN=LRX3 PE=1 SV=1	3.5	99-117	1	GO:0005576(extracellular region);GO:0009505(plant-type cell wall);GO:0009506(plasmodesma);GO:0005515(protein binding);GO:0007047(cellular cell wall organization)
miR5655-p3	TRINITY_DN27094_c2_g1	TRINITY_DN27094_c2_g1	sp|Q9LIB5|GAT17_ARATH GATA transcription factor 17 OS=Arabidopsis thaliana GN=GATA17 PE=2 SV=1	3.5	394-412	1	GO:0005634(nucleus);GO:0043565(sequence-specific DNA binding);GO:0003700(sequence-specific DNA binding transcription factor activity);GO:0008270(zinc ion binding)
miR5655-p3	TRINITY_DN24631_c1_g1	TRINITY_DN24631_c1_g1	sp|O65554|CIPK6_ARATH CBL-interacting serine/threonine-protein kinase 6 OS=Arabidopsis thaliana GN=CIPK6 PE=1 SV=1	3.5	433-451	1	GO:0005524(ATP binding);GO:0005515(protein binding);GO:0004674(protein serine/threonine kinase activity);GO:0010540(basipetal auxin transport);GO:0042538(hyperosmotic salinity response);GO:0007275(multicellular organismal development);GO:0009414(response to water deprivation);GO:0007165(signal transduction)
miR5655-p3	TRINITY_DN12363_c0_g1	TRINITY_DN12363_c0_g1	sp|Q9C660|PEK10_ARATH Proline-rich receptor-like protein kinase PERK10 OS=Arabidopsis thaliana GN=PERK10 PE=1 SV=2	3.5	229-247	1	GO:0016021(integral to membrane);GO:0005886(plasma membrane);GO:0005524(ATP binding);GO:0004674(protein serine/threonine kinase activity)
miR5655-p3	TRINITY_DN20386_c0_g1	TRINITY_DN20386_c0_g1	sp|Q9ZVN4|Y1500_ARATH Probable tyrosine-protein phosphatase At1g05000 OS=Arabidopsis thaliana GN=At1g05000 PE=1 SV=1	3.5	1601-1619	1	GO:0004725(protein tyrosine phosphatase activity)
miR5655-p3	TRINITY_DN32875_c7_g2	TRINITY_DN32875_c7_g2	-	3.5	191-209	1
miR5655-p3	TRINITY_DN24798_c0_g1	TRINITY_DN24798_c0_g1	sp|Q9LH89|Y3885_ARATH Uncharacterized protein At3g28850 OS=Arabidopsis thaliana GN=At3g28850 PE=1 SV=1	3.5	329-347	1	GO:0005886(plasma membrane);GO:0009055(electron carrier activity);GO:0015035(protein disulfide oxidoreductase activity);GO:0045454(cell redox homeostasis)
miR5655-p3	TRINITY_DN32875_c7_g3	TRINITY_DN32875_c7_g3	-	3.5	211-229	1
miR5655-p3	TRINITY_DN32875_c7_g7	TRINITY_DN32875_c7_g7	-	3.5	212-230	1
miR5655-p3	TRINITY_DN33682_c0_g1	TRINITY_DN33682_c0_g1	sp|Q9SGU9|MGL_ARATH Methionine gamma-lyase OS=Arabidopsis thaliana GN=MGL PE=1 SV=1	3.5	172-190	1		ko00270(Cysteine and methionine metabolism);ko00450(Selenoamino acid metabolism)
miR5655-p3	TRINITY_DN46650_c0_g1	TRINITY_DN46650_c0_g1	-	3.5	170-188	1
miR5655-p3	TRINITY_DN42160_c0_g1	TRINITY_DN42160_c0_g1	-	3.5	131-149	1
miR5655-p3	TRINITY_DN29759_c0_g1	TRINITY_DN29759_c0_g1	sp|Q9FGR7|PP426_ARATH Pentatricopeptide repeat-containing protein At5g50280, chloroplastic OS=Arabidopsis thaliana GN=EMB1006 PE=2 SV=1	3.5	2001-2019	1	GO:0009507(chloroplast);GO:0005488(binding)
miR5655-p3	TRINITY_DN27223_c0_g1	TRINITY_DN27223_c0_g1	sp|P57750|AGM1_ARATH Phosphoacetylglucosamine mutase OS=Arabidopsis thaliana GN=DRT101 PE=1 SV=1	3.5	1254-1272	1	GO:0005829(cytosol);GO:0005739(mitochondrion);GO:0009506(plasmodesma);GO:0046872(metal ion binding);GO:0004610(phosphoacetylglucosamine mutase activity);GO:0005975(carbohydrate metabolic process);GO:0000719(photoreactive repair);GO:0009411(response to UV)	ko00520(Amino sugar and nucleotide sugar metabolism)
miR5655-p3	TRINITY_DN29049_c0_g1	TRINITY_DN29049_c0_g1	-	3.5	756-774	1
miR5655-p3	TRINITY_DN29347_c1_g1	TRINITY_DN29347_c1_g1	sp|Q9FGV1|ARFH_ARATH Auxin response factor 8 OS=Arabidopsis thaliana GN=ARF8 PE=2 SV=2	3.5	2829-2847	1	GO:0005634(nucleus);GO:0003677(DNA binding);GO:0046983(protein dimerization activity);GO:0003700(sequence-specific DNA binding transcription factor activity);GO:0009734(auxin mediated signaling pathway);GO:0009908(flower development)
miR5655-p3	TRINITY_DN29983_c0_g1	TRINITY_DN29983_c0_g1	-	3.5	1233-1251	1
miR5655-p3	TRINITY_DN31881_c3_g1	TRINITY_DN31881_c3_g1	sp|Q700D2|JKD_ARATH Zinc finger protein JACKDAW OS=Arabidopsis thaliana GN=JKD PE=1 SV=1	3.5	405-423	1	GO:0005634(nucleus);GO:0003677(DNA binding);GO:0042803(protein homodimerization activity);GO:0008270(zinc ion binding);GO:0051302(regulation of cell division);GO:0045604(regulation of epidermal cell differentiation);GO:0010075(regulation of meristem growth);GO:0006355(regulation of transcription, DNA-dependent);GO:0048364(root development);GO:0006351(transcription, DNA-dependent)
miR5655-p3	TRINITY_DN32686_c2_g4	TRINITY_DN32686_c2_g4	sp|Q8CGC7|SYEP_MOUSE Bifunctional glutamate/proline--tRNA ligase OS=Mus musculus GN=Eprs PE=1 SV=4	3.5	5648-5666	1	GO:0005737(cytoplasm);GO:0005524(ATP binding);GO:0004818(glutamate-tRNA ligase activity);GO:0004827(proline-tRNA ligase activity);GO:0003723(RNA binding);GO:0006424(glutamyl-tRNA aminoacylation);GO:0006433(prolyl-tRNA aminoacylation)	ko00970(Aminoacyl-tRNA biosynthesis)
miR5655-p3	TRINITY_DN27649_c0_g1	TRINITY_DN27649_c0_g1	sp|O80831|BAM7_ARATH Beta-amylase 7 OS=Arabidopsis thaliana GN=BAM7 PE=2 SV=2	3.5	346-365	1	GO:0005737(cytoplasm);GO:0016161(beta-amylase activity);GO:0043169(cation binding);GO:0000272(polysaccharide catabolic process)
miR5655-p3	TRINITY_DN28599_c1_g1	TRINITY_DN28599_c1_g1	sp|Q84ZL0|FH5_ORYSJ Formin-like protein 5 OS=Oryza sativa subsp. japonica GN=FH5 PE=2 SV=2	3.5	104-122	1	GO:0003779(actin binding);GO:0004721(phosphoprotein phosphatase activity);GO:0030036(actin cytoskeleton organization)	ko04622(RIG-I-like receptor signaling pathway)
miR5655-p3	TRINITY_DN26016_c0_g1	TRINITY_DN26016_c0_g1	sp|Q8GYX9|WDL1_ARATH Protein WVD2-like 1 OS=Arabidopsis thaliana GN=WDL1 PE=2 SV=1	3.5	2174-2192	1
miR5655-p3	TRINITY_DN23530_c0_g1	TRINITY_DN23530_c0_g1	sp|P60838|DRL1_ARATH Probable disease resistance protein At1g12280 OS=Arabidopsis thaliana GN=At1g12280 PE=3 SV=1	3.5	1559-1577	1	GO:0005524(ATP binding);GO:0006915(apoptosis);GO:0006952(defense response)
miR5655-p3	TRINITY_DN29168_c2_g5	TRINITY_DN29168_c2_g5	sp|Q9LK03|PERK2_ARATH Proline-rich receptor-like protein kinase PERK2 OS=Arabidopsis thaliana GN=PERK2 PE=2 SV=3	3.5	3209-3227	1	GO:0016021(integral to membrane);GO:0005886(plasma membrane);GO:0005524(ATP binding);GO:0004674(protein serine/threonine kinase activity);GO:0004872(receptor activity)
miR5655-p3	TRINITY_DN15172_c0_g1	TRINITY_DN15172_c0_g1	-	3.5	95-113	1
miR5655-p3	TRINITY_DN32875_c7_g9	TRINITY_DN32875_c7_g9	-	3.5	413-431	1
miR5655-p3	TRINITY_DN15016_c0_g2	TRINITY_DN15016_c0_g2	-	3.5	432-450	1
miR5655-p3	TRINITY_DN25136_c2_g1	TRINITY_DN25136_c2_g1	-	3.5	283-301	1
miR5655-p3	TRINITY_DN23702_c0_g1	TRINITY_DN23702_c0_g1	-	3.5	975-993	1
miR5655-p3	TRINITY_DN8244_c0_g1	TRINITY_DN8244_c0_g1	-	3.5	206-224	1
miR5655-p3	TRINITY_DN15016_c0_g1	TRINITY_DN15016_c0_g1	-	3.5	619-637	1
miR5655-p3	TRINITY_DN32437_c0_g1	TRINITY_DN32437_c0_g1	-	3.5	2912-2930	1
miR5655-p3	TRINITY_DN3966_c0_g1	TRINITY_DN3966_c0_g1	sp|Q9LK03|PERK2_ARATH Proline-rich receptor-like protein kinase PERK2 OS=Arabidopsis thaliana GN=PERK2 PE=2 SV=3	3.5	459-477	1	GO:0016021(integral to membrane);GO:0005886(plasma membrane);GO:0005524(ATP binding);GO:0004674(protein serine/threonine kinase activity);GO:0004872(receptor activity)
miR5655-p3	TRINITY_DN43001_c0_g1	TRINITY_DN43001_c0_g1	-	3.5	175-193	1
miR5655-p3	TRINITY_DN33660_c0_g1	TRINITY_DN33660_c0_g1	sp|P31685|4CL2_SOLTU 4-coumarate--CoA ligase 2 OS=Solanum tuberosum GN=4CL2 PE=3 SV=1	3.5	667-685	1	GO:0016207(4-coumarate-CoA ligase activity);GO:0005524(ATP binding);GO:0009698(phenylpropanoid metabolic process)	ko00130(Ubiquinone and other terpenoid-quinone biosynthesis);ko00360(Phenylalanine metabolism);ko00940(Phenylpropanoid biosynthesis)
miR5655-p3	TRINITY_DN23181_c1_g1	TRINITY_DN23181_c1_g1	-	3.5	1279-1297	1
miR5655-p3	TRINITY_DN25859_c0_g1	TRINITY_DN25859_c0_g1	-	3.5	140-158	1
miR5655-p3	TRINITY_DN23615_c0_g4	TRINITY_DN23615_c0_g4	-	3.5	38-56	1
miR5655-p3	TRINITY_DN24350_c0_g2	TRINITY_DN24350_c0_g2	sp|Q9C682|BH115_ARATH Transcription factor bHLH115 OS=Arabidopsis thaliana GN=BHLH115 PE=2 SV=1	3.5	1081-1099	1	GO:0005634(nucleus);GO:0003677(DNA binding);GO:0006355(regulation of transcription, DNA-dependent);GO:0006351(transcription, DNA-dependent)
miR5655-p3	TRINITY_DN24900_c0_g1	TRINITY_DN24900_c0_g1	sp|Q94BZ5|HSFA5_ARATH Heat stress transcription factor A-5 OS=Arabidopsis thaliana GN=HSFA5 PE=2 SV=1	3.5	1751-1769	1	GO:0005737(cytoplasm);GO:0005634(nucleus);GO:0043565(sequence-specific DNA binding);GO:0003700(sequence-specific DNA binding transcription factor activity);GO:0006950(response to stress)
miR5655-p3	TRINITY_DN23615_c0_g5	TRINITY_DN23615_c0_g5	sp|Q9SX31|PERK9_ARATH Proline-rich receptor-like protein kinase PERK9 OS=Arabidopsis thaliana GN=PERK9 PE=2 SV=1	3.5	38-56	1	GO:0016021(integral to membrane);GO:0005886(plasma membrane);GO:0005524(ATP binding);GO:0004674(protein serine/threonine kinase activity)
miR5655-p3	TRINITY_DN28310_c0_g1	TRINITY_DN28310_c0_g1	sp|O65020|ETO1_ARATH Ethylene-overproduction protein 1 OS=Arabidopsis thaliana GN=ETO1 PE=1 SV=2	3.5	3444-3462	1	GO:0030674(protein binding, bridging);GO:0009873(ethylene mediated signaling pathway);GO:0043161(proteasomal ubiquitin-dependent protein catabolic process);GO:0010364(regulation of ethylene biosynthetic process);GO:2000069(regulation of post-embryonic root development);GO:0017145(stem cell division);GO:0010182(sugar mediated signaling pathway)
miR5655-p3	TRINITY_DN29686_c0_g1	TRINITY_DN29686_c0_g1	sp|Q05609|CTR1_ARATH Serine/threonine-protein kinase CTR1 OS=Arabidopsis thaliana GN=CTR1 PE=1 SV=1	3.5	3434-3452	1	GO:0005789(endoplasmic reticulum membrane);GO:0005524(ATP binding);GO:0005515(protein binding);GO:0004674(protein serine/threonine kinase activity);GO:0071281(cellular response to iron ion);GO:0009873(ethylene mediated signaling pathway);GO:0009686(gibberellin biosynthetic process);GO:0010105(negative regulation of ethylene mediated signaling pathway);GO:0046777(protein autophosphorylation);GO:20…	ko04010(MAPK signaling pathway);ko04530(Tight junction)
miR5655-p3	TRINITY_DN23819_c0_g2	TRINITY_DN23819_c0_g2	sp|Q9FGF8|ABR1_ARATH Ethylene-responsive transcription factor ABR1 OS=Arabidopsis thaliana GN=ABR1 PE=2 SV=1	3.5	1007-1025	1	GO:0005634(nucleus);GO:0003677(DNA binding);GO:0003700(sequence-specific DNA binding transcription factor activity);GO:0009738(abscisic acid mediated signaling pathway);GO:0050832(defense response to fungus);GO:0009873(ethylene mediated signaling pathway);GO:0009788(negative regulation of abscisic acid mediated signaling pathway);GO:0009749(response to glucose stimulus);GO:0006970(response to osm…
miR5655-p3	TRINITY_DN25113_c1_g1	TRINITY_DN25113_c1_g1	sp|Q8L7S8|RH3_ARATH DEAD-box ATP-dependent RNA helicase 3, chloroplastic OS=Arabidopsis thaliana GN=RH3 PE=1 SV=2	3.5	425-443	1	GO:0009570(chloroplast stroma);GO:0016020(membrane);GO:0005634(nucleus);GO:0005524(ATP binding);GO:0008026(ATP-dependent helicase activity);GO:0003723(RNA binding);GO:0008270(zinc ion binding)	ko04622(RIG-I-like receptor signaling pathway)
miR5655-p3	TRINITY_DN5395_c0_g1	TRINITY_DN5395_c0_g1	sp|Q9SHI2|Y1723_ARATH Leucine-rich repeat receptor-like serine/threonine-protein kinase At1g17230 OS=Arabidopsis thaliana GN=At1g17230 PE=2 SV=2	3.5	1910-1928	1	GO:0016021(integral to membrane);GO:0005886(plasma membrane);GO:0005524(ATP binding);GO:0004674(protein serine/threonine kinase activity);GO:0004872(receptor activity)
miR5655-p3	TRINITY_DN2167_c0_g2	TRINITY_DN2167_c0_g2	sp|Q8L7S3|C3H24_ARATH Zinc finger CCCH domain-containing protein 24 OS=Arabidopsis thaliana GN=At2g28450 PE=2 SV=1	3.5	2291-2308	1	GO:0003677(DNA binding);GO:0000166(nucleotide binding);GO:0008173(RNA methyltransferase activity);GO:0008270(zinc ion binding);GO:0006396(RNA processing)	ko00340(Histidine metabolism);ko00350(Tyrosine metabolism);ko00450(Selenoamino acid metabolism);ko00626(Naphthalene and anthracene degradation)
miR5655-p3	TRINITY_DN2167_c0_g1	TRINITY_DN2167_c0_g1	sp|Q8L7S3|C3H24_ARATH Zinc finger CCCH domain-containing protein 24 OS=Arabidopsis thaliana GN=At2g28450 PE=2 SV=1	3.5	2296-2313	1	GO:0003677(DNA binding);GO:0000166(nucleotide binding);GO:0008173(RNA methyltransferase activity);GO:0008270(zinc ion binding);GO:0006396(RNA processing)	ko00340(Histidine metabolism);ko00350(Tyrosine metabolism);ko00450(Selenoamino acid metabolism);ko00626(Naphthalene and anthracene degradation)
miR5655-p3	TRINITY_DN13926_c0_g1	TRINITY_DN13926_c0_g1	-	3.5	774-792	1
miR5655-p3	TRINITY_DN31489_c0_g1	TRINITY_DN31489_c0_g1	sp|Q0WVZ1|Y3330_ARATH Putative metallophosphoesterase At3g03305 OS=Arabidopsis thaliana GN=At3g03305 PE=2 SV=1	3.5	2500-2518	1	GO:0016021(integral to membrane);GO:0016787(hydrolase activity);GO:0046872(metal ion binding)
miR5655-p3	TRINITY_DN10447_c0_g1	TRINITY_DN10447_c0_g1	sp|O59668|YB83_SCHPO LisH domain-containing protein C29A3.03c OS=Schizosaccharomyces pombe (strain 972 / ATCC 24843) GN=SPBC29A3.03c PE=4 SV=1	3.5	132-150	1	GO:0005829(cytosol);GO:0034657(GID complex);GO:0005634(nucleus);GO:0008270(zinc ion binding);GO:0033554(cellular response to stress);GO:0045721(negative regulation of gluconeogenesis);GO:0043161(proteasomal ubiquitin-dependent protein catabolic process)
miR5655-p3	TRINITY_DN32816_c0_g1	TRINITY_DN32816_c0_g1	sp|Q6YYA3|CRS1_ORYSJ Chloroplastic group IIA intron splicing facilitator CRS1, chloroplastic OS=Oryza sativa subsp. japonica GN=Os08g0360100 PE=2 SV=1	3.5	2673-2691	1	GO:0009570(chloroplast stroma);GO:0030529(ribonucleoprotein complex);GO:0003723(RNA binding);GO:0006397(mRNA processing);GO:0006417(regulation of translation);GO:0008380(RNA splicing)
miR5655-p3	TRINITY_DN24450_c0_g1	TRINITY_DN24450_c0_g1	sp|Q0V7S6|FK125_ARATH F-box/kelch-repeat protein OR23 OS=Arabidopsis thaliana GN=OR23 PE=2 SV=1	3.5	506-525	1
miR5655-p3	TRINITY_DN2685_c0_g1	TRINITY_DN2685_c0_g1	-	3.5	964-982	1
miR5655-p3	TRINITY_DN12631_c0_g1	TRINITY_DN12631_c0_g1	sp|Q9ZWA6|MGP_ARATH Zinc finger protein MAGPIE OS=Arabidopsis thaliana GN=MGP PE=1 SV=1	3.5	321-339	1	GO:0005634(nucleus);GO:0003677(DNA binding);GO:0005515(protein binding);GO:0008270(zinc ion binding);GO:0006355(regulation of transcription, DNA-dependent);GO:0006351(transcription, DNA-dependent)
miR5655-p3	TRINITY_DN18225_c0_g1	TRINITY_DN18225_c0_g1	-	3.5	267-285	1
miR5655-p3	TRINITY_DN12363_c0_g1	TRINITY_DN12363_c0_g1	sp|Q9C660|PEK10_ARATH Proline-rich receptor-like protein kinase PERK10 OS=Arabidopsis thaliana GN=PERK10 PE=1 SV=2	3.5	109-127	1	GO:0016021(integral to membrane);GO:0005886(plasma membrane);GO:0005524(ATP binding);GO:0004674(protein serine/threonine kinase activity)
miR5655-p3	TRINITY_DN25136_c2_g1	TRINITY_DN25136_c2_g1	-	3.5	235-253	1
miR5655-p3	TRINITY_DN26455_c0_g1	TRINITY_DN26455_c0_g1	sp|Q9LMX5|AFP2_ARATH Ninja-family protein AFP2 OS=Arabidopsis thaliana GN=AFP2 PE=1 SV=1	3.5	574-592	1	GO:0005634(nucleus);GO:0005515(protein binding);GO:0009737(response to abscisic acid stimulus);GO:0006950(response to stress)
miR5655-p3	TRINITY_DN31881_c3_g1	TRINITY_DN31881_c3_g1	sp|Q700D2|JKD_ARATH Zinc finger protein JACKDAW OS=Arabidopsis thaliana GN=JKD PE=1 SV=1	3.5	1388-1406	1	GO:0005634(nucleus);GO:0003677(DNA binding);GO:0042803(protein homodimerization activity);GO:0008270(zinc ion binding);GO:0051302(regulation of cell division);GO:0045604(regulation of epidermal cell differentiation);GO:0010075(regulation of meristem growth);GO:0006355(regulation of transcription, DNA-dependent);GO:0048364(root development);GO:0006351(transcription, DNA-dependent)
miR5655-p3	TRINITY_DN24631_c1_g1	TRINITY_DN24631_c1_g1	sp|O65554|CIPK6_ARATH CBL-interacting serine/threonine-protein kinase 6 OS=Arabidopsis thaliana GN=CIPK6 PE=1 SV=1	3.5	277-295	1	GO:0005524(ATP binding);GO:0005515(protein binding);GO:0004674(protein serine/threonine kinase activity);GO:0010540(basipetal auxin transport);GO:0042538(hyperosmotic salinity response);GO:0007275(multicellular organismal development);GO:0009414(response to water deprivation);GO:0007165(signal transduction)
miR5655-p3	TRINITY_DN26293_c0_g2	TRINITY_DN26293_c0_g2	sp|Q9T0I5|PRP4_ARATH Proline-rich protein 4 OS=Arabidopsis thaliana GN=PRP4 PE=2 SV=1	3.5	786-804	1
miR5655-p3	TRINITY_DN28447_c0_g1	TRINITY_DN28447_c0_g1	sp|Q9LK03|PERK2_ARATH Proline-rich receptor-like protein kinase PERK2 OS=Arabidopsis thaliana GN=PERK2 PE=2 SV=3	3.5	695-713	1	GO:0016021(integral to membrane);GO:0005886(plasma membrane);GO:0005524(ATP binding);GO:0004674(protein serine/threonine kinase activity);GO:0004872(receptor activity)
miR5655-p3	TRINITY_DN26293_c0_g2	TRINITY_DN26293_c0_g2	sp|Q9T0I5|PRP4_ARATH Proline-rich protein 4 OS=Arabidopsis thaliana GN=PRP4 PE=2 SV=1	3.5	492-510	1
miR5655-p3	TRINITY_DN26293_c0_g1	TRINITY_DN26293_c0_g1	-	4	159-177	1
miR5655-p3	TRINITY_DN31868_c1_g1	TRINITY_DN31868_c1_g1	sp|Q8DM63|PYRH_THEEB Uridylate kinase OS=Thermosynechococcus elongatus (strain BP-1) GN=pyrH PE=3 SV=1	4	1414-1432	1	GO:0005737(cytoplasm);GO:0005524(ATP binding);GO:0033862(UMP kinase activity);GO:0008652(cellular amino acid biosynthetic process);GO:0006221(pyrimidine nucleotide biosynthetic process)	ko00240(Pyrimidine metabolism)
miR5655-p3	TRINITY_DN40961_c0_g1	TRINITY_DN40961_c0_g1	-	4	257-275	1
miR5655-p3	TRINITY_DN26293_c0_g3	TRINITY_DN26293_c0_g3	-	4	223-241	1
miR5655-p3	TRINITY_DN50793_c0_g1	TRINITY_DN50793_c0_g1	-	4	90-108	1
miR5655-p3	TRINITY_DN50729_c0_g1	TRINITY_DN50729_c0_g1	-	4	7-25	1
miR5655-p3	TRINITY_DN16261_c0_g2	TRINITY_DN16261_c0_g2	-	4	273-291	1
miR5655-p3	TRINITY_DN23956_c0_g1	TRINITY_DN23956_c0_g1	-	4	220-238	1
miR5655-p3	TRINITY_DN25012_c0_g1	TRINITY_DN25012_c0_g1	-	4	206-224	1
miR5655-p3	TRINITY_DN12835_c0_g1	TRINITY_DN12835_c0_g1	-	4	187-206	1
miR5655-p3	TRINITY_DN490_c0_g1	TRINITY_DN490_c0_g1	-	4	186-205	1
miR5655-p3	TRINITY_DN12835_c0_g2	TRINITY_DN12835_c0_g2	-	4	187-206	1
miR5655-p3	TRINITY_DN14113_c0_g1	TRINITY_DN14113_c0_g1	sp|Q9P0P0|RN181_HUMAN E3 ubiquitin-protein ligase RNF181 OS=Homo sapiens GN=RNF181 PE=1 SV=1	4	15-33	1	GO:0016874(ligase activity);GO:0008270(zinc ion binding)
miR5655-p3	TRINITY_DN10588_c0_g1	TRINITY_DN10588_c0_g1	-	4	99-117	1
miR5655-p3	TRINITY_DN32135_c1_g3	TRINITY_DN32135_c1_g3	sp|Q9SX31|PERK9_ARATH Proline-rich receptor-like protein kinase PERK9 OS=Arabidopsis thaliana GN=PERK9 PE=2 SV=1	4	793-811	1	GO:0016021(integral to membrane);GO:0005886(plasma membrane);GO:0005524(ATP binding);GO:0004674(protein serine/threonine kinase activity)
miR5655-p3	TRINITY_DN47668_c0_g1	TRINITY_DN47668_c0_g1	sp|A2YQ93|PRR37_ORYSI Two-component response regulator-like PRR37 OS=Oryza sativa subsp. indica GN=PRR37 PE=2 SV=2	4	41-59	1	GO:0005634(nucleus);GO:0000156(two-component response regulator activity);GO:0006355(regulation of transcription, DNA-dependent);GO:0048511(rhythmic process);GO:0006351(transcription, DNA-dependent)	ko04712(Circadian rhythm - plant)
miR5655-p3	TRINITY_DN23293_c0_g1	TRINITY_DN23293_c0_g1	-	4	173-191	1
miR5655-p3	TRINITY_DN15264_c0_g1	TRINITY_DN15264_c0_g1	-	4	158-176	1
miR5655-p3	TRINITY_DN31526_c2_g4	TRINITY_DN31526_c2_g4	-	4	63-81	1
miR5655-p3	TRINITY_DN12019_c0_g1	TRINITY_DN12019_c0_g1	-	4	11-29	1
miR5655-p3	TRINITY_DN29259_c0_g1	TRINITY_DN29259_c0_g1	sp|Q93V85|WTR16_ARATH WAT1-related protein At3g02690, chloroplastic OS=Arabidopsis thaliana GN=At3g02690 PE=1 SV=1	4	1329-1347	1
miR5655-p3	TRINITY_DN27448_c0_g1	TRINITY_DN27448_c0_g1	sp|Q9C660|PEK10_ARATH Proline-rich receptor-like protein kinase PERK10 OS=Arabidopsis thaliana GN=PERK10 PE=1 SV=2	4	1490-1508	1	GO:0016021(integral to membrane);GO:0005886(plasma membrane);GO:0005524(ATP binding);GO:0004674(protein serine/threonine kinase activity)
miR5655-p3	TRINITY_DN26850_c0_g1	TRINITY_DN26850_c0_g1	sp|Q6F8G6|CYSG_ACIAD Siroheme synthase OS=Acinetobacter sp. (strain ADP1) GN=cysG PE=3 SV=1	4	1150-1168	1	GO:0051287(NAD binding);GO:0043115(precorrin-2 dehydrogenase activity);GO:0051266(sirohydrochlorin ferrochelatase activity);GO:0004851(uroporphyrin-III C-methyltransferase activity);GO:0009236(cobalamin biosynthetic process);GO:0019354(siroheme biosynthetic process)	ko00860(Porphyrin and chlorophyll metabolism)
miR5655-p3	TRINITY_DN25108_c1_g1	TRINITY_DN25108_c1_g1	-	4	128-146	1
miR5655-p3	TRINITY_DN21912_c2_g7	TRINITY_DN21912_c2_g7	-	4	265-284	1
miR5655-p3	TRINITY_DN13772_c0_g1	TRINITY_DN13772_c0_g1	-	4	702-720	1
miR5655-p3	TRINITY_DN19497_c0_g1	TRINITY_DN19497_c0_g1	-	4	930-948	1
miR5655-p3	TRINITY_DN21912_c2_g3	TRINITY_DN21912_c2_g3	-	4	265-284	1
miR5655-p3	TRINITY_DN30883_c1_g5	TRINITY_DN30883_c1_g5	sp|Q9LK03|PERK2_ARATH Proline-rich receptor-like protein kinase PERK2 OS=Arabidopsis thaliana GN=PERK2 PE=2 SV=3	4	245-263	1	GO:0016021(integral to membrane);GO:0005886(plasma membrane);GO:0005524(ATP binding);GO:0004674(protein serine/threonine kinase activity);GO:0004872(receptor activity)
miR5655-p3	TRINITY_DN31782_c1_g1	TRINITY_DN31782_c1_g1	-	4	426-444	1
miR5655-p3	TRINITY_DN21912_c2_g2	TRINITY_DN21912_c2_g2	-	4	265-284	1
miR5655-p3	TRINITY_DN21912_c2_g1	TRINITY_DN21912_c2_g1	-	4	265-284	1
miR5655-p3	TRINITY_DN21912_c2_g4	TRINITY_DN21912_c2_g4	-	4	265-284	1
miR5655-p3	TRINITY_DN21912_c2_g6	TRINITY_DN21912_c2_g6	-	4	265-284	1
miR5655-p3	TRINITY_DN19497_c0_g2	TRINITY_DN19497_c0_g2	-	4	1175-1193	1
miR5655-p3	TRINITY_DN27551_c1_g1	TRINITY_DN27551_c1_g1	sp|Q9UHD9|UBQL2_HUMAN Ubiquilin-2 OS=Homo sapiens GN=UBQLN2 PE=1 SV=2	4	1986-2004	1	GO:0005737(cytoplasm);GO:0005634(nucleus);GO:0005886(plasma membrane);GO:0005515(protein binding)
miR5655-p3	TRINITY_DN26748_c0_g1	TRINITY_DN26748_c0_g1	sp|Q9SZC9|HMA6_ARATH Copper-transporting ATPase PAA1, chloroplastic OS=Arabidopsis thaliana GN=PAA1 PE=2 SV=1	4	2717-2735	1	GO:0009941(chloroplast envelope);GO:0009570(chloroplast stroma);GO:0016021(integral to membrane);GO:0005524(ATP binding);GO:0004008(copper-exporting ATPase activity);GO:0046872(metal ion binding);GO:0006754(ATP biosynthetic process);GO:0009767(photosynthetic electron transport chain)
miR5655-p3	TRINITY_DN26293_c0_g2	TRINITY_DN26293_c0_g2	sp|Q9T0I5|PRP4_ARATH Proline-rich protein 4 OS=Arabidopsis thaliana GN=PRP4 PE=2 SV=1	4	1050-1068	1
miR5655-p3	TRINITY_DN25558_c0_g2	TRINITY_DN25558_c0_g2	sp|Q38914|ANT_ARATH AP2-like ethylene-responsive transcription factor ANT OS=Arabidopsis thaliana GN=ANT PE=1 SV=2	4	117-135	1	GO:0005634(nucleus);GO:0003677(DNA binding);GO:0003700(sequence-specific DNA binding transcription factor activity);GO:0030154(cell differentiation);GO:0009908(flower development);GO:0042127(regulation of cell proliferation)
miR5655-p3	TRINITY_DN25558_c0_g3	TRINITY_DN25558_c0_g3	sp|Q38914|ANT_ARATH AP2-like ethylene-responsive transcription factor ANT OS=Arabidopsis thaliana GN=ANT PE=1 SV=2	4	117-135	1	GO:0005634(nucleus);GO:0003677(DNA binding);GO:0003700(sequence-specific DNA binding transcription factor activity);GO:0030154(cell differentiation);GO:0009908(flower development);GO:0042127(regulation of cell proliferation)
miR5655-p3	TRINITY_DN25558_c0_g1	TRINITY_DN25558_c0_g1	sp|Q38914|ANT_ARATH AP2-like ethylene-responsive transcription factor ANT OS=Arabidopsis thaliana GN=ANT PE=1 SV=2	4	117-135	1	GO:0005634(nucleus);GO:0003677(DNA binding);GO:0003700(sequence-specific DNA binding transcription factor activity);GO:0030154(cell differentiation);GO:0009908(flower development);GO:0042127(regulation of cell proliferation)
miR5655-p3	TRINITY_DN27058_c1_g1	TRINITY_DN27058_c1_g1	sp|P55034|PSMD4_ARATH 26S proteasome non-ATPase regulatory subunit 4 OS=Arabidopsis thaliana GN=MBP1 PE=1 SV=1	4	955-973	1	GO:0005829(cytosol);GO:0016020(membrane);GO:0005634(nucleus);GO:0000502(proteasome complex);GO:0001653(peptide receptor activity);GO:0008270(zinc ion binding);GO:0006281(DNA repair);GO:0048366(leaf development);GO:0010150(leaf senescence);GO:0009555(pollen development);GO:0048528(post-embryonic root development);GO:0043161(proteasomal ubiquitin-dependent protein catabolic process);GO:0043248(prot…	ko03050(Proteasome)
miR5655-p3	TRINITY_DN24520_c1_g1	TRINITY_DN24520_c1_g1	sp|Q9SGZ5|BXL7_ARATH Probable beta-D-xylosidase 7 OS=Arabidopsis thaliana GN=BXL7 PE=2 SV=2	4	187-205	1	GO:0048046(apoplast);GO:0009507(chloroplast);GO:0009505(plant-type cell wall);GO:0009506(plasmodesma);GO:0005578(proteinaceous extracellular matrix);GO:0004553(hydrolase activity, hydrolyzing O-glycosyl compounds);GO:0005975(carbohydrate metabolic process)	ko00460(Cyanoamino acid metabolism);ko00500(Starch and sucrose metabolism);ko00940(Phenylpropanoid biosynthesis)
miR5655-p3	TRINITY_DN21912_c2_g5	TRINITY_DN21912_c2_g5	-	4	265-284	1
miR5655-p3	TRINITY_DN1655_c0_g1	TRINITY_DN1655_c0_g1	-	4	177-194	1
miR5655-p3	TRINITY_DN1655_c0_g2	TRINITY_DN1655_c0_g2	-	4	177-194	1
miR5655-p3	TRINITY_DN22868_c0_g4	TRINITY_DN22868_c0_g4	-	4	158-176	1
miR5655-p3	TRINITY_DN22868_c0_g14	TRINITY_DN22868_c0_g14	-	4	158-176	1
miR5655-p3	TRINITY_DN22868_c0_g6	TRINITY_DN22868_c0_g6	-	4	158-176	1
miR5655-p3	TRINITY_DN23594_c0_g1	TRINITY_DN23594_c0_g1	-	4	1052-1070	1
miR5655-p3	TRINITY_DN32236_c2_g2	TRINITY_DN32236_c2_g2	-	4	66-84	1
miR5655-p3	TRINITY_DN15859_c2_g1	TRINITY_DN15859_c2_g1	-	4	90-108	1
miR5655-p3	TRINITY_DN22868_c0_g1	TRINITY_DN22868_c0_g1	-	4	158-176	1
miR5655-p3	TRINITY_DN22868_c0_g5	TRINITY_DN22868_c0_g5	-	4	158-176	1
miR5655-p3	TRINITY_DN22868_c0_g3	TRINITY_DN22868_c0_g3	-	4	158-176	1
miR5655-p3	TRINITY_DN22868_c0_g11	TRINITY_DN22868_c0_g11	-	4	158-176	1
miR5655-p3	TRINITY_DN22868_c0_g10	TRINITY_DN22868_c0_g10	-	4	158-176	1
miR5655-p3	TRINITY_DN22868_c0_g9	TRINITY_DN22868_c0_g9	-	4	158-176	1
miR5655-p3	TRINITY_DN22868_c0_g13	TRINITY_DN22868_c0_g13	-	4	158-176	1
miR5655-p3	TRINITY_DN22868_c0_g12	TRINITY_DN22868_c0_g12	-	4	158-176	1
miR5655-p3	TRINITY_DN22868_c0_g7	TRINITY_DN22868_c0_g7	-	4	158-176	1
miR5655-p3	TRINITY_DN22868_c0_g8	TRINITY_DN22868_c0_g8	-	4	158-176	1
miR5655-p3	TRINITY_DN22868_c0_g2	TRINITY_DN22868_c0_g2	-	4	158-176	1
miR5655-p3	TRINITY_DN32236_c2_g11	TRINITY_DN32236_c2_g11	sp|Q66KL9|RBM42_XENTR RNA-binding protein 42 OS=Xenopus tropicalis GN=rbm42 PE=2 SV=1	4	66-84	1	GO:0005737(cytoplasm);GO:0005634(nucleus);GO:0000166(nucleotide binding);GO:0003723(RNA binding)
miR5655-p3	TRINITY_DN40218_c0_g1	TRINITY_DN40218_c0_g1	-	4	26-44	1
miR5655-p3	TRINITY_DN21881_c1_g1	TRINITY_DN21881_c1_g1	-	4	273-291	1
miR5655-p3	TRINITY_DN40982_c0_g1	TRINITY_DN40982_c0_g1	sp|P42763|ERD14_ARATH Dehydrin ERD14 OS=Arabidopsis thaliana GN=ERD14 PE=1 SV=1	4	40-58	1	GO:0009507(chloroplast);GO:0005829(cytosol);GO:0005886(plasma membrane);GO:0005509(calcium ion binding);GO:0009737(response to abscisic acid stimulus);GO:0009409(response to cold);GO:0009269(response to desiccation)
miR5655-p3	TRINITY_DN32592_c3_g1	TRINITY_DN32592_c3_g1	-	4	978-996	1
miR5655-p3	TRINITY_DN25824_c2_g1	TRINITY_DN25824_c2_g1	-	4	1525-1543	1
miR5655-p3	TRINITY_DN29415_c1_g1	TRINITY_DN29415_c1_g1	-	4	215-233	1
miR5655-p3	TRINITY_DN29415_c1_g2	TRINITY_DN29415_c1_g2	-	4	216-234	1
miR5655-p3	TRINITY_DN29415_c1_g5	TRINITY_DN29415_c1_g5	-	4	217-235	1
miR5655-p3	TRINITY_DN29415_c1_g3	TRINITY_DN29415_c1_g3	-	4	218-236	1
miR5655-p3	TRINITY_DN29415_c1_g4	TRINITY_DN29415_c1_g4	-	4	219-237	1
miR5655-p3	TRINITY_DN29415_c1_g8	TRINITY_DN29415_c1_g8	-	4	221-239	1
miR5655-p3	TRINITY_DN29415_c1_g6	TRINITY_DN29415_c1_g6	-	4	222-240	1
miR5655-p3	TRINITY_DN17168_c0_g2	TRINITY_DN17168_c0_g2	sp|Q6AWX7|GRF12_ORYSJ Growth-regulating factor 12 OS=Oryza sativa subsp. japonica GN=GRF12 PE=2 SV=1	4	1786-1804	1
miR5655-p3	TRINITY_DN29415_c1_g9	TRINITY_DN29415_c1_g9	-	4	223-241	1
miR5655-p3	TRINITY_DN29415_c1_g11	TRINITY_DN29415_c1_g11	-	4	224-242	1
miR5655-p3	TRINITY_DN29415_c1_g10	TRINITY_DN29415_c1_g10	-	4	230-248	1
miR5655-p3	TRINITY_DN17056_c1_g1	TRINITY_DN17056_c1_g1	sp|Q9C658|DCP5_ARATH Protein decapping 5 OS=Arabidopsis thaliana GN=DCP5 PE=1 SV=1	4	806-824	1
miR5655-p3	TRINITY_DN17168_c0_g1	TRINITY_DN17168_c0_g1	sp|Q6AWX7|GRF12_ORYSJ Growth-regulating factor 12 OS=Oryza sativa subsp. japonica GN=GRF12 PE=2 SV=1	4	1786-1804	1
miR5655-p3	TRINITY_DN29155_c0_g1	TRINITY_DN29155_c0_g1	-	4	888-906	1
miR5655-p3	TRINITY_DN29415_c1_g12	TRINITY_DN29415_c1_g12	-	4	233-251	1
miR5655-p3	TRINITY_DN29415_c1_g7	TRINITY_DN29415_c1_g7	-	4	243-261	1
miR5655-p3	TRINITY_DN32592_c5_g2	TRINITY_DN32592_c5_g2	sp|P23881|TCEA3_MOUSE Transcription elongation factor A protein 3 OS=Mus musculus GN=Tcea3 PE=1 SV=3	4	1785-1803	1	GO:0005634(nucleus);GO:0003677(DNA binding);GO:0003746(translation elongation factor activity);GO:0008270(zinc ion binding);GO:0032784(regulation of transcription elongation, DNA-dependent);GO:0006357(regulation of transcription from RNA polymerase II promoter);GO:0006354(transcription elongation, DNA-dependent)
miR5655-p3	TRINITY_DN17652_c0_g1	TRINITY_DN17652_c0_g1	sp|Q9QYJ3|DNJB1_MOUSE DnaJ homolog subfamily B member 1 OS=Mus musculus GN=Dnajb1 PE=2 SV=3	4	1060-1078	1	GO:0005737(cytoplasm);GO:0005730(nucleolus);GO:0031072(heat shock protein binding);GO:0051082(unfolded protein binding);GO:0051085(chaperone mediated protein folding requiring cofactor);GO:0006950(response to stress)
miR5655-p3	TRINITY_DN9428_c0_g1	TRINITY_DN9428_c0_g1	sp|O81902|PUB8_ARATH U-box domain-containing protein 8 OS=Arabidopsis thaliana GN=PUB8 PE=2 SV=1	4	831-849	1	GO:0000151(ubiquitin ligase complex);GO:0004842(ubiquitin-protein ligase activity);GO:0008270(zinc ion binding)
miR5655-p3	TRINITY_DN19742_c2_g1	TRINITY_DN19742_c2_g1	sp|Q9SX31|PERK9_ARATH Proline-rich receptor-like protein kinase PERK9 OS=Arabidopsis thaliana GN=PERK9 PE=2 SV=1	4	221-239	1	GO:0016021(integral to membrane);GO:0005886(plasma membrane);GO:0005524(ATP binding);GO:0004674(protein serine/threonine kinase activity)
miR5655-p3	TRINITY_DN30338_c2_g1	TRINITY_DN30338_c2_g1	-	4	83-101	1
miR5655-p3	TRINITY_DN31828_c0_g1	TRINITY_DN31828_c0_g1	sp|P55034|PSMD4_ARATH 26S proteasome non-ATPase regulatory subunit 4 OS=Arabidopsis thaliana GN=MBP1 PE=1 SV=1	4	1582-1600	1	GO:0005829(cytosol);GO:0016020(membrane);GO:0005634(nucleus);GO:0000502(proteasome complex);GO:0001653(peptide receptor activity);GO:0008270(zinc ion binding);GO:0006281(DNA repair);GO:0048366(leaf development);GO:0010150(leaf senescence);GO:0009555(pollen development);GO:0048528(post-embryonic root development);GO:0043161(proteasomal ubiquitin-dependent protein catabolic process);GO:0043248(prot…	ko03050(Proteasome)
miR5655-p3	TRINITY_DN27761_c2_g3	TRINITY_DN27761_c2_g3	sp|O81316|SCL6_ARATH Scarecrow-like protein 6 OS=Arabidopsis thaliana GN=SCL6 PE=1 SV=1	4	2318-2336	1	GO:0005634(nucleus);GO:0005515(protein binding);GO:0051301(cell division);GO:0007623(circadian rhythm);GO:0006355(regulation of transcription, DNA-dependent);GO:0048768(root hair cell tip growth);GO:0006351(transcription, DNA-dependent)
miR5655-p3	TRINITY_DN32236_c2_g24	TRINITY_DN32236_c2_g24	sp|Q9C660|PEK10_ARATH Proline-rich receptor-like protein kinase PERK10 OS=Arabidopsis thaliana GN=PERK10 PE=1 SV=2	4	278-296	1	GO:0016021(integral to membrane);GO:0005886(plasma membrane);GO:0005524(ATP binding);GO:0004674(protein serine/threonine kinase activity)
miR5655-p3	TRINITY_DN32236_c2_g6	TRINITY_DN32236_c2_g6	-	4	277-295	1
miR5655-p3	TRINITY_DN29401_c0_g1	TRINITY_DN29401_c0_g1	-	4	3380-3398	1
miR5655-p3	TRINITY_DN17665_c0_g1	TRINITY_DN17665_c0_g1	-	4	506-525	1
miR5655-p3	TRINITY_DN16131_c0_g1	TRINITY_DN16131_c0_g1	sp|Q9SRE5|Y1666_ARATH Uncharacterized protein At1g76660 OS=Arabidopsis thaliana GN=At1g76660 PE=1 SV=1	4	789-807	1	GO:0005886(plasma membrane)
miR5655-p3	TRINITY_DN24626_c0_g1	TRINITY_DN24626_c0_g1	-	4	914-932	1
miR5655-p3	TRINITY_DN29762_c0_g1	TRINITY_DN29762_c0_g1	-	4	2013-2031	1
miR5655-p3	TRINITY_DN30468_c1_g1	TRINITY_DN30468_c1_g1	sp|Q8H0W1|PLSP1_ARATH Chloroplast processing peptidase OS=Arabidopsis thaliana GN=PLSP1 PE=2 SV=2	4	863-881	1	GO:0009941(chloroplast envelope);GO:0009535(chloroplast thylakoid membrane);GO:0016021(integral to membrane);GO:0008236(serine-type peptidase activity);GO:0051604(protein maturation);GO:0006508(proteolysis);GO:0010027(thylakoid membrane organization)	ko03060(Protein export)
miR5655-p3	TRINITY_DN33034_c1_g5	TRINITY_DN33034_c1_g5	sp|Q869L3|MDN1_DICDI Midasin OS=Dictyostelium discoideum GN=mdn1 PE=3 SV=2	4	11024-11042	1	GO:0005634(nucleus);GO:0005524(ATP binding);GO:0016887(ATPase activity);GO:0008134(transcription factor binding);GO:0043254(regulation of protein complex assembly);GO:0006355(regulation of transcription, DNA-dependent)
miR5655-p3	TRINITY_DN25992_c0_g1	TRINITY_DN25992_c0_g1	sp|Q9SRU2|BIG_ARATH Auxin transport protein BIG OS=Arabidopsis thaliana GN=BIG PE=1 SV=2	4	936-954	1	GO:0005829(cytosol);GO:0016021(integral to membrane);GO:0009506(plasmodesma);GO:0004842(ubiquitin-protein ligase activity);GO:0008270(zinc ion binding);GO:0009734(auxin mediated signaling pathway);GO:0009926(auxin polar transport);GO:0048281(inflorescence morphogenesis);GO:0010311(lateral root formation);GO:0009640(photomorphogenesis);GO:0009620(response to fungus);GO:0009826(unidimensional cell …
miR5655-p3	TRINITY_DN31526_c2_g18	TRINITY_DN31526_c2_g18	-	4	1230-1248	1
miR5655-p3	TRINITY_DN31526_c2_g7	TRINITY_DN31526_c2_g7	-	4	1231-1249	1
miR5655-p3	TRINITY_DN31526_c2_g11	TRINITY_DN31526_c2_g11	-	4	1232-1250	1
miR5655-p3	TRINITY_DN31526_c2_g25	TRINITY_DN31526_c2_g25	-	4	1233-1251	1
miR5655-p3	TRINITY_DN31526_c2_g6	TRINITY_DN31526_c2_g6	-	4	1234-1252	1
miR5655-p3	TRINITY_DN31526_c2_g8	TRINITY_DN31526_c2_g8	-	4	1235-1253	1
miR5655-p3	TRINITY_DN31526_c2_g21	TRINITY_DN31526_c2_g21	-	4	1236-1254	1
miR5655-p3	TRINITY_DN31526_c2_g14	TRINITY_DN31526_c2_g14	-	4	1237-1255	1
miR5655-p3	TRINITY_DN31526_c2_g20	TRINITY_DN31526_c2_g20	-	4	1238-1256	1
miR5655-p3	TRINITY_DN31526_c2_g22	TRINITY_DN31526_c2_g22	-	4	1239-1257	1
miR5655-p3	TRINITY_DN31526_c2_g1	TRINITY_DN31526_c2_g1	-	4	1240-1258	1
miR5655-p3	TRINITY_DN31526_c2_g9	TRINITY_DN31526_c2_g9	-	4	1241-1259	1
miR5655-p3	TRINITY_DN31526_c2_g12	TRINITY_DN31526_c2_g12	-	4	1242-1260	1
miR5655-p3	TRINITY_DN31526_c2_g16	TRINITY_DN31526_c2_g16	-	4	1243-1261	1
miR5655-p3	TRINITY_DN31526_c2_g2	TRINITY_DN31526_c2_g2	-	4	1244-1262	1
miR5655-p3	TRINITY_DN31526_c2_g17	TRINITY_DN31526_c2_g17	-	4	1245-1263	1
miR5655-p3	TRINITY_DN31526_c2_g24	TRINITY_DN31526_c2_g24	-	4	1246-1264	1
miR5655-p3	TRINITY_DN31526_c2_g23	TRINITY_DN31526_c2_g23	-	4	1247-1265	1
miR5655-p3	TRINITY_DN31526_c2_g15	TRINITY_DN31526_c2_g15	-	4	1248-1266	1
miR5655-p3	TRINITY_DN31526_c2_g3	TRINITY_DN31526_c2_g3	-	4	1253-1271	1
miR5655-p3	TRINITY_DN31526_c2_g5	TRINITY_DN31526_c2_g5	-	4	1255-1273	1
miR5655-p3	TRINITY_DN31526_c2_g13	TRINITY_DN31526_c2_g13	-	4	1256-1274	1
miR5655-p3	TRINITY_DN31526_c2_g10	TRINITY_DN31526_c2_g10	-	4	1257-1275	1
miR5655-p3	TRINITY_DN31526_c2_g19	TRINITY_DN31526_c2_g19	-	4	1259-1277	1
miR5655-p3	TRINITY_DN22703_c2_g2	TRINITY_DN22703_c2_g2	sp|P51968|RO31_XENLA Heterogeneous nuclear ribonucleoprotein A3 homolog 1 OS=Xenopus laevis PE=2 SV=1	4	206-224	1	GO:0005634(nucleus);GO:0030529(ribonucleoprotein complex);GO:0000166(nucleotide binding);GO:0003723(RNA binding)
miR5655-p3	TRINITY_DN7167_c0_g2	TRINITY_DN7167_c0_g2	sp|Q6S004|KIF6_DICDI Kinesin-related protein 6 OS=Dictyostelium discoideum GN=kif6 PE=2 SV=1	4	1185-1203	1	GO:0005813(centrosome);GO:0005874(microtubule);GO:0005524(ATP binding);GO:0003777(microtubule motor activity);GO:0007018(microtubule-based movement);GO:0006810(transport)
miR5655-p3	TRINITY_DN31754_c1_g1	TRINITY_DN31754_c1_g1	-	4	275-293	1
miR5655-p3	TRINITY_DN27059_c0_g2	TRINITY_DN27059_c0_g2	sp|P08799|MYS2_DICDI Myosin-2 heavy chain OS=Dictyostelium discoideum GN=mhcA PE=1 SV=3	4	3626-3644	1	GO:0042641(actomyosin);GO:0005826(actomyosin contractile ring);GO:0032982(myosin filament);GO:0016460(myosin II complex);GO:0001931(uropod);GO:0051015(actin filament binding);GO:0030898(actin-dependent ATPase activity);GO:0005524(ATP binding);GO:0005516(calmodulin binding);GO:0000146(microfilament motor activity);GO:0042803(protein homodimerization activity);GO:0033275(actin-myosin filament slidi…
miR5655-p3	TRINITY_DN21560_c0_g1	TRINITY_DN21560_c0_g1	sp|A2XFB7|PRR73_ORYSI Two-component response regulator-like PRR73 OS=Oryza sativa subsp. indica GN=PRR73 PE=2 SV=2	4	1774-1792	1	GO:0005634(nucleus);GO:0000156(two-component response regulator activity);GO:0006355(regulation of transcription, DNA-dependent);GO:0048511(rhythmic process);GO:0006351(transcription, DNA-dependent)	ko04712(Circadian rhythm - plant)
miR5655-p3	TRINITY_DN27179_c0_g1	TRINITY_DN27179_c0_g1	sp|Q4KL91|S36A4_XENLA Proton-coupled amino acid transporter 4 OS=Xenopus laevis GN=slc36a4 PE=2 SV=1	4	949-967	1	GO:0016021(integral to membrane);GO:0015293(symporter activity);GO:0006865(amino acid transport)
miR5655-p3	TRINITY_DN1782_c0_g1	TRINITY_DN1782_c0_g1	-	4	337-355	1
miR5655-p3	TRINITY_DN396_c0_g1	TRINITY_DN396_c0_g1	sp|O22719|LHTL3_ARATH Lysine histidine transporter-like 3 OS=Arabidopsis thaliana GN=At1g61270 PE=3 SV=2	4	914-932	1	GO:0016021(integral to membrane);GO:0005886(plasma membrane);GO:0006865(amino acid transport)
miR5655-p3	TRINITY_DN31084_c0_g1	TRINITY_DN31084_c0_g1	sp|Q9ZQ98|U73C2_ARATH UDP-glycosyltransferase 73C2 OS=Arabidopsis thaliana GN=UGT73C2 PE=3 SV=1	4	352-370	1	GO:0016758(transferase activity, transferring hexosyl groups)
miR5655-p3	TRINITY_DN1782_c0_g2	TRINITY_DN1782_c0_g2	-	4	337-355	1
miR5655-p3	TRINITY_DN19742_c2_g2	TRINITY_DN19742_c2_g2	-	4	74-92	1
miR5655-p3	TRINITY_DN28585_c0_g1	TRINITY_DN28585_c0_g1	-	4	43-61	1
miR5655-p3	TRINITY_DN16022_c1_g1	TRINITY_DN16022_c1_g1	-	4	366-384	1
miR5655-p3	TRINITY_DN20370_c0_g1	TRINITY_DN20370_c0_g1	-	4	612-631	1
miR5655-p3	TRINITY_DN17669_c0_g1	TRINITY_DN17669_c0_g1	-	4	578-596	1
miR5655-p3	TRINITY_DN18919_c0_g1	TRINITY_DN18919_c0_g1	-	4	114-132	1
miR5655-p3	TRINITY_DN18919_c0_g4	TRINITY_DN18919_c0_g4	-	4	117-135	1
miR5655-p3	TRINITY_DN49425_c0_g1	TRINITY_DN49425_c0_g1	sp|Q3E936|MAKR1_ARATH Probable membrane-associated kinase regulator 1 OS=Arabidopsis thaliana GN=MAKR1 PE=1 SV=1	4	333-351	1	GO:0005886(plasma membrane);GO:0019210(kinase inhibitor activity);GO:0009742(brassinosteroid mediated signaling pathway)
miR5655-p3	TRINITY_DN31848_c1_g2	TRINITY_DN31848_c1_g2	sp|Q9SS81|PP221_ARATH Pentatricopeptide repeat-containing protein At3g09060 OS=Arabidopsis thaliana GN=At3g09060 PE=2 SV=1	4	273-291	1	GO:0005488(binding)
miR5655-p3	TRINITY_DN6298_c0_g1	TRINITY_DN6298_c0_g1	-	4	170-188	1
miR5655-p3	TRINITY_DN28428_c1_g5	TRINITY_DN28428_c1_g5	-	4	75-93	1
miR5655-p3	TRINITY_DN25629_c0_g1	TRINITY_DN25629_c0_g1	sp|Q9LNF4|P2C13_ARATH Probable protein phosphatase 2C 13 OS=Arabidopsis thaliana GN=At1g48040 PE=2 SV=2	4	1535-1553	1	GO:0008287(protein serine/threonine phosphatase complex);GO:0046872(metal ion binding);GO:0004722(protein serine/threonine phosphatase activity);GO:0006470(protein dephosphorylation)
miR5655-p3	TRINITY_DN25321_c1_g1	TRINITY_DN25321_c1_g1	sp|Q9FH28|DNJ49_ARATH Chaperone protein dnaJ 49 OS=Arabidopsis thaliana GN=ATJ49 PE=2 SV=2	4	1320-1338	1	GO:0016021(integral to membrane);GO:0031072(heat shock protein binding);GO:0051082(unfolded protein binding);GO:0006457(protein folding)
miR5655-p3	TRINITY_DN22912_c1_g1	TRINITY_DN22912_c1_g1	sp|Q55GG4|Y9847_DICDI Probable serine/threonine-protein kinase DDB_G0267686 OS=Dictyostelium discoideum GN=DDB_G0267686 PE=3 SV=1	4	1881-1899	1	GO:0005524(ATP binding);GO:0004674(protein serine/threonine kinase activity);GO:0004871(signal transducer activity)
miR5655-p3	TRINITY_DN31136_c4_g2	TRINITY_DN31136_c4_g2	-	4	229-247	1
miR5655-p3	TRINITY_DN22868_c0_g15	TRINITY_DN22868_c0_g15	sp|Q9SH58|MAKR2_ARATH Probable membrane-associated kinase regulator 2 OS=Arabidopsis thaliana GN=MAKR2 PE=2 SV=1	4	1748-1766	1	GO:0005886(plasma membrane)
miR5655-p3	TRINITY_DN29980_c2_g2	TRINITY_DN29980_c2_g2	sp|Q6Z2G9|TLP5_ORYSJ Tubby-like F-box protein 5 OS=Oryza sativa subsp. japonica GN=TULP5 PE=2 SV=1	4	1768-1786	1
miR5655-p3	TRINITY_DN2763_c0_g1	TRINITY_DN2763_c0_g1	-	4	84-102	1
miR5655-p3	TRINITY_DN48049_c0_g1	TRINITY_DN48049_c0_g1	-	4	127-145	1
miR5655-p3	TRINITY_DN23615_c0_g3	TRINITY_DN23615_c0_g3	-	4	322-340	1
miR5655-p3	TRINITY_DN26066_c0_g2	TRINITY_DN26066_c0_g2	-	4	1927-1945	1
miR5655-p3	TRINITY_DN36702_c0_g1	TRINITY_DN36702_c0_g1	sp|Q9SEZ1|HB29_ARATH Transcription factor HB29 OS=Arabidopsis thaliana GN=HB29 PE=1 SV=1	4	3-22	1
miR5655-p3	TRINITY_DN621_c0_g1	TRINITY_DN621_c0_g1	-	4	764-782	1		ko00290(Valine,ko leucine and isoleucine biosynthesis);ko00970(Aminoacyl-tRNA biosynthesis)
miR5655-p3	TRINITY_DN16022_c1_g2	TRINITY_DN16022_c1_g2	sp|Q9LK03|PERK2_ARATH Proline-rich receptor-like protein kinase PERK2 OS=Arabidopsis thaliana GN=PERK2 PE=2 SV=3	4	375-393	1	GO:0016021(integral to membrane);GO:0005886(plasma membrane);GO:0005524(ATP binding);GO:0004674(protein serine/threonine kinase activity);GO:0004872(receptor activity)
miR5655-p3	TRINITY_DN30287_c2_g1	TRINITY_DN30287_c2_g1	-	4	268-286	1
miR5655-p3	TRINITY_DN28796_c0_g1	TRINITY_DN28796_c0_g1	sp|A7HNE8|DDL_FERNB D-alanine--D-alanine ligase OS=Fervidobacterium nodosum (strain ATCC 35602 / DSM 5306 / Rt17-B1) GN=ddl PE=3 SV=1	4	2975-2993	1	GO:0005618(cell wall);GO:0005737(cytoplasm);GO:0005524(ATP binding);GO:0008716(D-alanine-D-alanine ligase activity);GO:0046872(metal ion binding);GO:0007047(cellular cell wall organization);GO:0009252(peptidoglycan biosynthetic process);GO:0008360(regulation of cell shape)
miR5655-p3	TRINITY_DN17262_c0_g1	TRINITY_DN17262_c0_g1	sp|Q2NUD2|CDD_SODGM Cytidine deaminase OS=Sodalis glossinidius (strain morsitans) GN=cdd PE=3 SV=1	4	180-198	1	GO:0004126(cytidine deaminase activity);GO:0008270(zinc ion binding)	ko00240(Pyrimidine metabolism);ko00983(Drug metabolism - other enzymes)
miR5655-p3	TRINITY_DN8936_c0_g2	TRINITY_DN8936_c0_g2	-	4	303-321	1
miR5655-p3	TRINITY_DN9476_c0_g1	TRINITY_DN9476_c0_g1	sp|Q9ZSY8|IAA27_ARATH Auxin-responsive protein IAA27 OS=Arabidopsis thaliana GN=IAA27 PE=1 SV=1	4	690-708	1	GO:0005634(nucleus);GO:0046983(protein dimerization activity);GO:0009734(auxin mediated signaling pathway);GO:0006355(regulation of transcription, DNA-dependent);GO:0006351(transcription, DNA-dependent)
miR5655-p3	TRINITY_DN42151_c0_g1	TRINITY_DN42151_c0_g1	-	4	28-46	1
miR5655-p3	TRINITY_DN33426_c0_g1	TRINITY_DN33426_c0_g1	-	4	260-278	1
miR5655-p3	TRINITY_DN8936_c0_g1	TRINITY_DN8936_c0_g1	-	4	328-346	1
miR5655-p3	TRINITY_DN28951_c0_g2	TRINITY_DN28951_c0_g2	sp|F6H2F8|TRM51_VITVI tRNA (guanine(37)-N1)-methyltransferase 1 OS=Vitis vinifera GN=VIT_19s0014g03930 PE=3 SV=1	4	1135-1153	1
miR5655-p3	TRINITY_DN32939_c2_g8	TRINITY_DN32939_c2_g8	-	4	179-197	1
miR5655-p3	TRINITY_DN17619_c0_g1	TRINITY_DN17619_c0_g1	-	4	323-341	1
miR5655-p3	TRINITY_DN11980_c0_g1	TRINITY_DN11980_c0_g1	-	4	64-82	1
miR5655-p3	TRINITY_DN19447_c0_g2	TRINITY_DN19447_c0_g2	-	4	1543-1561	1
miR5655-p3	TRINITY_DN11980_c0_g2	TRINITY_DN11980_c0_g2	-	4	64-82	1
miR5655-p3	TRINITY_DN31136_c4_g24	TRINITY_DN31136_c4_g24	sp|Q54MZ4|MCFB_DICDI Mitochondrial substrate carrier family protein B OS=Dictyostelium discoideum GN=mcfB PE=3 SV=1	4	1770-1789	1	GO:0016021(integral to membrane);GO:0005743(mitochondrial inner membrane);GO:0015217(ADP transmembrane transporter activity);GO:0005347(ATP transmembrane transporter activity);GO:0005509(calcium ion binding);GO:0015114(phosphate transmembrane transporter activity)	ko04020(Calcium signaling pathway)
miR5655-p3	TRINITY_DN32673_c0_g1	TRINITY_DN32673_c0_g1	sp|F4IHS2|SYD_ARATH Chromatin structure-remodeling complex protein SYD OS=Arabidopsis thaliana GN=SYD PE=1 SV=1	4	728-746	1
miR5655-p3	TRINITY_DN22374_c1_g1	TRINITY_DN22374_c1_g1	-	4	2261-2279	1
miR5655-p3	TRINITY_DN26564_c0_g1	TRINITY_DN26564_c0_g1	sp|Q10410|YD85_SCHPO Probable ADP-ribosylation factor-binding protein C1F3.05 OS=Schizosaccharomyces pombe (strain 972 / ATCC 24843) GN=SPAC1F3.05 PE=3 SV=1	4	2229-2247	1	GO:0030131(clathrin adaptor complex);GO:0005829(cytosol);GO:0005634(nucleus);GO:0005802(trans-Golgi network);GO:0006896(Golgi to vacuole transport);GO:0006886(intracellular protein transport)
miR5655-p3	TRINITY_DN30685_c0_g1	TRINITY_DN30685_c0_g1	sp|Q9SU30|CPR30_ARATH F-box protein CPR30 OS=Arabidopsis thaliana GN=CPR30 PE=1 SV=2	4	1504-1523	1	GO:0005737(cytoplasm);GO:0005634(nucleus);GO:0005515(protein binding);GO:0031348(negative regulation of defense response);GO:0009626(plant-type hypersensitive response)
miR5655-p3	TRINITY_DN32132_c0_g1	TRINITY_DN32132_c0_g1	sp|P08799|MYS2_DICDI Myosin-2 heavy chain OS=Dictyostelium discoideum GN=mhcA PE=1 SV=3	4	3197-3215	1	GO:0042641(actomyosin);GO:0005826(actomyosin contractile ring);GO:0032982(myosin filament);GO:0016460(myosin II complex);GO:0001931(uropod);GO:0051015(actin filament binding);GO:0030898(actin-dependent ATPase activity);GO:0005524(ATP binding);GO:0005516(calmodulin binding);GO:0000146(microfilament motor activity);GO:0042803(protein homodimerization activity);GO:0033275(actin-myosin filament slidi…
miR5655-p3	TRINITY_DN29114_c0_g1	TRINITY_DN29114_c0_g1	-	4	455-473	1
miR5655-p3	TRINITY_DN26603_c1_g1	TRINITY_DN26603_c1_g1	sp|Q9M9P3|UGPA2_ARATH Probable UTP--glucose-1-phosphate uridylyltransferase 2 OS=Arabidopsis thaliana GN=At3g03250 PE=1 SV=1	4	1997-2015	1	GO:0005829(cytosol);GO:0005886(plasma membrane);GO:0090406(pollen tube);GO:0003983(UTP:glucose-1-phosphate uridylyltransferase activity);GO:0052543(callose deposition in cell wall);GO:0016036(cellular response to phosphate starvation);GO:0009555(pollen development);GO:0009651(response to salt stress);GO:0005985(sucrose metabolic process)	ko00040(Pentose and glucuronate interconversions);ko00052(Galactose metabolism);ko00500(Starch and sucrose metabolism);ko00520(Amino sugar and nucleotide sugar metabolism)
miR5655-p3	TRINITY_DN21160_c0_g1	TRINITY_DN21160_c0_g1	-	4	37-55	1
miR5655-p3	TRINITY_DN19931_c0_g1	TRINITY_DN19931_c0_g1	sp|O65023|EAAC_ARATH Probable envelope ADP,ATP carrier protein, chloroplastic OS=Arabidopsis thaliana GN=EAAC PE=2 SV=2	4	1475-1493	1	GO:0031969(chloroplast membrane);GO:0016021(integral to membrane);GO:0005743(mitochondrial inner membrane);GO:0005488(binding);GO:0009624(response to nematode);GO:0055085(transmembrane transport)
miR5655-p3	TRINITY_DN15629_c0_g2	TRINITY_DN15629_c0_g2	-	4	1154-1172	1
miR5655-p3	TRINITY_DN15629_c0_g1	TRINITY_DN15629_c0_g1	-	4	1154-1172	1
miR5655-p3	TRINITY_DN32875_c8_g5	TRINITY_DN32875_c8_g5	-	4	78-96	1
miR5655-p3	TRINITY_DN50512_c0_g1	TRINITY_DN50512_c0_g1	-	4	314-332	1
miR5655-p3	TRINITY_DN24549_c0_g1	TRINITY_DN24549_c0_g1	sp|Q7XTT4|NUCL2_ORYSJ Nucleolin 2 OS=Oryza sativa subsp. japonica GN=Os04g0620700 PE=2 SV=2	4	66-84	1
miR5655-p3	TRINITY_DN22415_c0_g1	TRINITY_DN22415_c0_g1	sp|Q9LUI1|LRX6_ARATH Leucine-rich repeat extensin-like protein 6 OS=Arabidopsis thaliana GN=LRX6 PE=2 SV=1	4	473-491	1	GO:0005618(cell wall);GO:0005576(extracellular region);GO:0007047(cellular cell wall organization)
miR5655-p3	TRINITY_DN15629_c0_g3	TRINITY_DN15629_c0_g3	-	4	1154-1172	1
miR5655-p3	TRINITY_DN31745_c1_g2	TRINITY_DN31745_c1_g2	sp|P46607|HGL2_ARATH Homeobox-leucine zipper protein GLABRA 2 OS=Arabidopsis thaliana GN=GL2 PE=2 SV=3	4	2225-2244	1	GO:0005634(nucleus);GO:0043565(sequence-specific DNA binding);GO:0003700(sequence-specific DNA binding transcription factor activity);GO:0009957(epidermal cell fate specification);GO:0010062(negative regulation of trichoblast fate specification)
miR5655-p3	TRINITY_DN28268_c6_g1	TRINITY_DN28268_c6_g1	-	4	330-348	1
miR5655-p3	TRINITY_DN23683_c1_g1	TRINITY_DN23683_c1_g1	sp|P31542|CLPAB_SOLLC ATP-dependent Clp protease ATP-binding subunit clpA homolog CD4B, chloroplastic OS=Solanum lycopersicum GN=CD4B PE=3 SV=1	4	2353-2371	1	GO:0009507(chloroplast);GO:0005524(ATP binding);GO:0003677(DNA binding);GO:0004518(nuclease activity);GO:0017111(nucleoside-triphosphatase activity);GO:0006289(nucleotide-excision repair);GO:0019538(protein metabolic process)
miR5655-p3	TRINITY_DN16531_c0_g1	TRINITY_DN16531_c0_g1	sp|Q94A84|U72E1_ARATH UDP-glycosyltransferase 72E1 OS=Arabidopsis thaliana GN=UGT72E1 PE=1 SV=1	4	397-415	1	GO:0047209(coniferyl-alcohol glucosyltransferase activity);GO:0009808(lignin metabolic process);GO:0009636(response to toxin)	ko00940(Phenylpropanoid biosynthesis)
miR5655-p3	TRINITY_DN32875_c8_g6	TRINITY_DN32875_c8_g6	-	4	126-144	1
miR5655-p3	TRINITY_DN45844_c0_g1	TRINITY_DN45844_c0_g1	sp|Q0WUQ1|BAG1_ARATH BAG family molecular chaperone regulator 1 OS=Arabidopsis thaliana GN=BAG1 PE=1 SV=1	4	457-475	1
miR5655-p3	TRINITY_DN10003_c0_g1	TRINITY_DN10003_c0_g1	-	4	260-278	1
miR5655-p3	TRINITY_DN48855_c0_g1	TRINITY_DN48855_c0_g1	sp|Q9SB61|Y4466_ARATH ZF-HD homeobox protein At4g24660 OS=Arabidopsis thaliana GN=At4g24660 PE=1 SV=1	4	491-509	1	GO:0005634(nucleus);GO:0003677(DNA binding);GO:0046872(metal ion binding);GO:0005515(protein binding);GO:0009793(embryo development ending in seed dormancy);GO:0006355(regulation of transcription, DNA-dependent);GO:0006351(transcription, DNA-dependent)
miR5655-p3	TRINITY_DN21054_c0_g2	TRINITY_DN21054_c0_g2	sp|Q9SEU4|SR33_ARATH Serine/arginine-rich splicing factor 33 OS=Arabidopsis thaliana GN=SR33 PE=1 SV=1	4	2461-2479	1
miR5655-p3	TRINITY_DN32535_c0_g1	TRINITY_DN32535_c0_g1	-	4	5504-5521	1
miR5655-p3	TRINITY_DN32530_c0_g1	TRINITY_DN32530_c0_g1	sp|Q84TI3|OBE4_ARATH Protein OBERON 4 OS=Arabidopsis thaliana GN=OBE4 PE=1 SV=2	4	3344-3361	1	GO:0005634(nucleus);GO:0046872(metal ion binding);GO:0005515(protein binding)
miR5655-p3	TRINITY_DN29415_c1_g13	TRINITY_DN29415_c1_g13	sp|Q94KE2|TIC_ARATH Protein TIME FOR COFFEE OS=Arabidopsis thaliana GN=TIC PE=1 SV=2	4	159-177	1	GO:0005634(nucleus);GO:0048511(rhythmic process)
miR5655-p3	TRINITY_DN29893_c0_g1	TRINITY_DN29893_c0_g1	sp|Q1PE49|4ON1_ARATH Protein At-4/1 OS=Arabidopsis thaliana GN=At4g26020 PE=1 SV=1	4	1365-1383	1	GO:0005783(endoplasmic reticulum);GO:0009506(plasmodesma);GO:0005515(protein binding);GO:0010496(intercellular transport);GO:0044419(interspecies interaction between organisms);GO:0046907(intracellular transport)
miR5655-p3	TRINITY_DN9799_c0_g1	TRINITY_DN9799_c0_g1	-	4	533-551	1
miR5655-p3	TRINITY_DN9799_c0_g2	TRINITY_DN9799_c0_g2	-	4	533-551	1
miR5655-p3	TRINITY_DN12931_c0_g1	TRINITY_DN12931_c0_g1	sp|Q9SB61|Y4466_ARATH ZF-HD homeobox protein At4g24660 OS=Arabidopsis thaliana GN=At4g24660 PE=1 SV=1	4	31-49	1	GO:0005634(nucleus);GO:0003677(DNA binding);GO:0046872(metal ion binding);GO:0005515(protein binding);GO:0009793(embryo development ending in seed dormancy);GO:0006355(regulation of transcription, DNA-dependent);GO:0006351(transcription, DNA-dependent)
miR5655-p3	TRINITY_DN7033_c0_g1	TRINITY_DN7033_c0_g1	-	4	323-341	1
miR5655-p3	TRINITY_DN6946_c0_g1	TRINITY_DN6946_c0_g1	sp|Q84UQ3|C3H56_ORYSJ Zinc finger CCCH domain-containing protein 56 OS=Oryza sativa subsp. japonica GN=Os08g0159800 PE=2 SV=1	4	802-820	1	GO:0003677(DNA binding);GO:0008270(zinc ion binding)
miR5655-p3	TRINITY_DN32875_c8_g9	TRINITY_DN32875_c8_g9	-	4	311-329	1
miR5655-p3	TRINITY_DN18619_c0_g1	TRINITY_DN18619_c0_g1	-	4	786-804	1
miR5655-p3	TRINITY_DN20401_c0_g1	TRINITY_DN20401_c0_g1	-	4	254-272	1
miR5655-p3	TRINITY_DN21217_c0_g1	TRINITY_DN21217_c0_g1	-	4	405-423	1
miR5655-p3	TRINITY_DN16896_c0_g1	TRINITY_DN16896_c0_g1	sp|O48845|CYB5B_ARATH Cytochrome b5 isoform B OS=Arabidopsis thaliana GN=CYTB5-B PE=1 SV=1	4	585-603	1	GO:0005789(endoplasmic reticulum membrane);GO:0016021(integral to membrane);GO:0005792(microsome);GO:0020037(heme binding);GO:0005515(protein binding);GO:0022900(electron transport chain);GO:0006810(transport)
miR5655-p3	TRINITY_DN24171_c0_g3	TRINITY_DN24171_c0_g3	sp|Q84JS6|KNAT6_ARATH Homeobox protein knotted-1-like 6 OS=Arabidopsis thaliana GN=KNAT6 PE=1 SV=1	4	522-540	1	GO:0005634(nucleus);GO:0043565(sequence-specific DNA binding);GO:0003700(sequence-specific DNA binding transcription factor activity);GO:0010073(meristem maintenance)
miR5655-p3	TRINITY_DN16342_c0_g1	TRINITY_DN16342_c0_g1	-	4	974-992	1
miR5655-p3	TRINITY_DN17439_c0_g1	TRINITY_DN17439_c0_g1	sp|Q8IZQ5|SELH_HUMAN Selenoprotein H OS=Homo sapiens GN=SELH PE=1 SV=2	4	662-680	1	GO:0008430(selenium binding);GO:0045454(cell redox homeostasis)
miR5655-p3	TRINITY_DN16543_c0_g1	TRINITY_DN16543_c0_g1	sp|Q9FJ72|WAXS1_ARATH Probable long-chain-alcohol O-fatty-acyltransferase 1 OS=Arabidopsis thaliana GN=AT1 PE=2 SV=1	4	991-1010	1	GO:0016021(integral to membrane);GO:0047196(long-chain-alcohol O-fatty-acyltransferase activity);GO:0008610(lipid biosynthetic process)
miR5655-p3	TRINITY_DN29979_c1_g1	TRINITY_DN29979_c1_g1	sp|Q9SJ20|RIR1_ARATH Ribonucleoside-diphosphate reductase large subunit OS=Arabidopsis thaliana GN=RNR1 PE=1 SV=1	4	396-414	1	GO:0005971(ribonucleoside-diphosphate reductase complex);GO:0005524(ATP binding);GO:0004748(ribonucleoside-diphosphate reductase activity);GO:0009202(deoxyribonucleoside triphosphate biosynthetic process);GO:0006260(DNA replication);GO:0046686(response to cadmium ion)	ko00230(Purine metabolism);ko00240(Pyrimidine metabolism);ko00480(Glutathione metabolism)
miR5655-p3	TRINITY_DN10462_c0_g1	TRINITY_DN10462_c0_g1	sp|Q9SV07|ASAT1_ARATH Acyl-CoA--sterol O-acyltransferase 1 OS=Arabidopsis thaliana GN=ASAT1 PE=1 SV=1	4	1087-1105	1	GO:0016021(integral to membrane);GO:0005515(protein binding);GO:0016746(transferase activity, transferring acyl groups);GO:0016127(sterol catabolic process);GO:0034434(sterol esterification)
miR5655-p3	TRINITY_DN25839_c0_g1	TRINITY_DN25839_c0_g1	-	4	2763-2781	1
miR5655-p3	TRINITY_DN17424_c2_g1	TRINITY_DN17424_c2_g1	sp|Q8S9H7|DIV_ANTMA Transcription factor DIVARICATA OS=Antirrhinum majus GN=DIVARICATA PE=2 SV=1	4	382-400	1
miR5655-p3	TRINITY_DN4593_c0_g1	TRINITY_DN4593_c0_g1	sp|Q9FDW1|MYB44_ARATH Transcription factor MYB44 OS=Arabidopsis thaliana GN=MYB44 PE=2 SV=1	4	867-885	1	GO:0005634(nucleus);GO:0003677(DNA binding);GO:0009738(abscisic acid mediated signaling pathway);GO:0006355(regulation of transcription, DNA-dependent);GO:0009733(response to auxin stimulus);GO:0046686(response to cadmium ion);GO:0010200(response to chitin);GO:0009723(response to ethylene stimulus);GO:0009739(response to gibberellin stimulus);GO:0009753(response to jasmonic acid stimulus);GO:0009…
miR5655-p3	TRINITY_DN7785_c0_g1	TRINITY_DN7785_c0_g1	-	4	728-746	1
miR5655-p3	TRINITY_DN30960_c0_g1	TRINITY_DN30960_c0_g1	-	4	849-867	1
miR5655-p3	TRINITY_DN30459_c1_g1	TRINITY_DN30459_c1_g1	-	4	703-721	1
miR5655-p3	TRINITY_DN32722_c1_g1	TRINITY_DN32722_c1_g1	sp|Q9SVP7|PP307_ARATH Pentatricopeptide repeat-containing protein At4g13650 OS=Arabidopsis thaliana GN=PCMP-H42 PE=2 SV=2	4	66-85	1	GO:0005488(binding)	ko00061(Fatty acid biosynthesis);ko01040(Biosynthesis of unsaturated fatty acids)
miR5655-p3	TRINITY_DN26556_c0_g1	TRINITY_DN26556_c0_g1	-	4	1304-1322	1
miR5655-p3	TRINITY_DN29630_c0_g2	TRINITY_DN29630_c0_g2	sp|Q9SEL7|DEGP5_ARATH Protease Do-like 5, chloroplastic OS=Arabidopsis thaliana GN=DEGP5 PE=1 SV=3	4	1582-1600	1	GO:0009543(chloroplast thylakoid lumen);GO:0004252(serine-type endopeptidase activity);GO:0010206(photosystem II repair);GO:0006508(proteolysis)
miR5655-p3	TRINITY_DN24621_c1_g1	TRINITY_DN24621_c1_g1	sp|Q92804|RBP56_HUMAN TATA-binding protein-associated factor 2N OS=Homo sapiens GN=TAF15 PE=1 SV=1	4	2509-2527	1	GO:0005737(cytoplasm);GO:0005634(nucleus);GO:0003677(DNA binding);GO:0000166(nucleotide binding);GO:0005515(protein binding);GO:0003723(RNA binding);GO:0008270(zinc ion binding);GO:0045893(positive regulation of transcription, DNA-dependent)
miR5655-p3	TRINITY_DN26293_c0_g2	TRINITY_DN26293_c0_g2	sp|Q9T0I5|PRP4_ARATH Proline-rich protein 4 OS=Arabidopsis thaliana GN=PRP4 PE=2 SV=1	4	756-774	1
miR5655-p3	TRINITY_DN19742_c0_g1	TRINITY_DN19742_c0_g1	-	4	501-519	1
miR5655-p3	TRINITY_DN19742_c0_g2	TRINITY_DN19742_c0_g2	-	4	507-525	1
miR5655-p3	TRINITY_DN18016_c0_g1	TRINITY_DN18016_c0_g1	sp|Q9LY00|WRK70_ARATH Probable WRKY transcription factor 70 OS=Arabidopsis thaliana GN=WRKY70 PE=2 SV=1	4	503-521	1	GO:0005634(nucleus);GO:0043565(sequence-specific DNA binding);GO:0003700(sequence-specific DNA binding transcription factor activity);GO:0050832(defense response to fungus);GO:0009864(induced systemic resistance, jasmonic acid mediated signaling pathway);GO:0045892(negative regulation of transcription, DNA-dependent);GO:0010200(response to chitin);GO:0009862(systemic acquired resistance, salicyli…
miR5655-p3	TRINITY_DN5006_c0_g1	TRINITY_DN5006_c0_g1	sp|Q9FNR1|RBG3_ARATH Glycine-rich RNA-binding protein 3, mitochondrial OS=Arabidopsis thaliana GN=RBG3 PE=2 SV=1	4	790-808	1
miR5655-p3	TRINITY_DN28599_c1_g1	TRINITY_DN28599_c1_g1	sp|Q84ZL0|FH5_ORYSJ Formin-like protein 5 OS=Oryza sativa subsp. japonica GN=FH5 PE=2 SV=2	4	44-62	1	GO:0003779(actin binding);GO:0004721(phosphoprotein phosphatase activity);GO:0030036(actin cytoskeleton organization)	ko04622(RIG-I-like receptor signaling pathway)
miR5655-p3	TRINITY_DN24549_c0_g1	TRINITY_DN24549_c0_g1	sp|Q7XTT4|NUCL2_ORYSJ Nucleolin 2 OS=Oryza sativa subsp. japonica GN=Os04g0620700 PE=2 SV=2	4	9-27	1
miR5655-p3	TRINITY_DN19742_c2_g1	TRINITY_DN19742_c2_g1	sp|Q9SX31|PERK9_ARATH Proline-rich receptor-like protein kinase PERK9 OS=Arabidopsis thaliana GN=PERK9 PE=2 SV=1	4	74-92	1	GO:0016021(integral to membrane);GO:0005886(plasma membrane);GO:0005524(ATP binding);GO:0004674(protein serine/threonine kinase activity)
miR5655-p3	TRINITY_DN16022_c1_g1	TRINITY_DN16022_c1_g1	-	4	318-336	1
miR5655-p3	TRINITY_DN6298_c0_g1	TRINITY_DN6298_c0_g1	-	4	98-116	1
miR5655-p3	TRINITY_DN22415_c0_g1	TRINITY_DN22415_c0_g1	sp|Q9LUI1|LRX6_ARATH Leucine-rich repeat extensin-like protein 6 OS=Arabidopsis thaliana GN=LRX6 PE=2 SV=1	4	413-431	1	GO:0005618(cell wall);GO:0005576(extracellular region);GO:0007047(cellular cell wall organization)
miR5655-p3	TRINITY_DN19690_c0_g1	TRINITY_DN19690_c0_g1	sp|Q9C660|PEK10_ARATH Proline-rich receptor-like protein kinase PERK10 OS=Arabidopsis thaliana GN=PERK10 PE=1 SV=2	4	83-101	1	GO:0016021(integral to membrane);GO:0005886(plasma membrane);GO:0005524(ATP binding);GO:0004674(protein serine/threonine kinase activity)
miR5655-p3	TRINITY_DN12484_c0_g1	TRINITY_DN12484_c0_g1	sp|Q9FKP8|Y5541_ARATH ZF-HD homeobox protein At5g65410 OS=Arabidopsis thaliana GN=At5g65410 PE=1 SV=1	4	956-974	1	GO:0005634(nucleus);GO:0003677(DNA binding);GO:0008270(zinc ion binding);GO:0006355(regulation of transcription, DNA-dependent);GO:0006351(transcription, DNA-dependent)
miR5655-p3	TRINITY_DN12631_c0_g1	TRINITY_DN12631_c0_g1	sp|Q9ZWA6|MGP_ARATH Zinc finger protein MAGPIE OS=Arabidopsis thaliana GN=MGP PE=1 SV=1	4	591-609	1	GO:0005634(nucleus);GO:0003677(DNA binding);GO:0005515(protein binding);GO:0008270(zinc ion binding);GO:0006355(regulation of transcription, DNA-dependent);GO:0006351(transcription, DNA-dependent)
miR5655-p3	TRINITY_DN19488_c0_g2	TRINITY_DN19488_c0_g2	sp|Q8W4R3|RH30_ARATH DEAD-box ATP-dependent RNA helicase 30 OS=Arabidopsis thaliana GN=RH30 PE=2 SV=2	4	2689-2707	1	GO:0005634(nucleus);GO:0005524(ATP binding);GO:0008026(ATP-dependent helicase activity);GO:0003723(RNA binding);GO:0000184(nuclear-transcribed mRNA catabolic process, nonsense-mediated decay);GO:0006364(rRNA processing)
miR8175_1	TRINITY_DN47267_c0_g1	TRINITY_DN47267_c0_g1	-	3	15-31	1
miR8175_1	TRINITY_DN30263_c0_g1	TRINITY_DN30263_c0_g1	sp|Q9LSF1|OXI1_ARATH Serine/threonine-protein kinase OXI1 OS=Arabidopsis thaliana GN=OXI1 PE=1 SV=1	4	1469-1486	1	GO:0005524(ATP binding);GO:0019901(protein kinase binding);GO:0004674(protein serine/threonine kinase activity);GO:0006952(defense response);GO:0006979(response to oxidative stress);GO:0009611(response to wounding)
miR8175_1	TRINITY_DN21147_c1_g2	TRINITY_DN21147_c1_g2	-	4	311-328	1
miR8175_1	TRINITY_DN31320_c0_g1	TRINITY_DN31320_c0_g1	-	4	70-87	1
miR8175_1	TRINITY_DN50470_c0_g1	TRINITY_DN50470_c0_g1	-	4	97-114	1
miR827_2	TRINITY_DN16373_c0_g3	TRINITY_DN16373_c0_g3	-	1.5	372-392	1
miR827_2	TRINITY_DN20863_c0_g2	TRINITY_DN20863_c0_g2	sp|Q9MA98|ERCC1_ARATH DNA excision repair protein ERCC-1 OS=Arabidopsis thaliana GN=ERCC1 PE=2 SV=1	4	103-123	1	GO:0005634(nucleus);GO:0017108(5'-flap endonuclease activity);GO:0003684(damaged DNA binding);GO:0000724(double-strand break repair via homologous recombination);GO:0010213(non-photoreactive DNA repair);GO:0006294(nucleotide-excision repair, preincision complex assembly);GO:0010332(response to gamma radiation);GO:0010224(response to UV-B)	ko03420(Nucleotide excision repair)
miR827_1	TRINITY_DN16373_c0_g3	TRINITY_DN16373_c0_g3	-	1	372-393	1
miR827_1	TRINITY_DN28822_c0_g2	TRINITY_DN28822_c0_g2	sp|Q9FH83|WRK52_ARATH Probable WRKY transcription factor 52 OS=Arabidopsis thaliana GN=WRKY52 PE=2 SV=3	4	79-99	1	GO:0005634(nucleus);GO:0005524(ATP binding);GO:0043565(sequence-specific DNA binding);GO:0003700(sequence-specific DNA binding transcription factor activity);GO:0006915(apoptosis);GO:0009816(defense response to bacterium, incompatible interaction)
miR827_1	TRINITY_DN31904_c0_g5	TRINITY_DN31904_c0_g5	sp|Q9SZ67|WRK19_ARATH Probable WRKY transcription factor 19 OS=Arabidopsis thaliana GN=WRKY19 PE=2 SV=1	4	178-198	1	GO:0009941(chloroplast envelope);GO:0031224(intrinsic to membrane);GO:0005634(nucleus);GO:0005524(ATP binding);GO:0017111(nucleoside-triphosphatase activity);GO:0005515(protein binding);GO:0004674(protein serine/threonine kinase activity);GO:0043565(sequence-specific DNA binding);GO:0003700(sequence-specific DNA binding transcription factor activity);GO:0004888(transmembrane signaling receptor ac…
miR827_1	TRINITY_DN28822_c0_g1	TRINITY_DN28822_c0_g1	sp|Q40392|TMVRN_NICGU TMV resistance protein N OS=Nicotiana glutinosa GN=N PE=1 SV=1	4	94-114	1	GO:0005737(cytoplasm);GO:0031224(intrinsic to membrane);GO:0005524(ATP binding);GO:0005515(protein binding);GO:0004888(transmembrane signaling receptor activity);GO:0006915(apoptosis);GO:0009626(plant-type hypersensitive response)
miR827_1	TRINITY_DN28822_c0_g3	TRINITY_DN28822_c0_g3	sp|Q40392|TMVRN_NICGU TMV resistance protein N OS=Nicotiana glutinosa GN=N PE=1 SV=1	4	5-25	1	GO:0005737(cytoplasm);GO:0031224(intrinsic to membrane);GO:0005524(ATP binding);GO:0005515(protein binding);GO:0004888(transmembrane signaling receptor activity);GO:0006915(apoptosis);GO:0009626(plant-type hypersensitive response)
miR827_1	TRINITY_DN28822_c0_g4	TRINITY_DN28822_c0_g4	sp|Q40392|TMVRN_NICGU TMV resistance protein N OS=Nicotiana glutinosa GN=N PE=1 SV=1	4	5-25	1	GO:0005737(cytoplasm);GO:0031224(intrinsic to membrane);GO:0005524(ATP binding);GO:0005515(protein binding);GO:0004888(transmembrane signaling receptor activity);GO:0006915(apoptosis);GO:0009626(plant-type hypersensitive response)
miR845a-p3_1	TRINITY_DN32493_c0_g2	TRINITY_DN32493_c0_g2	-	1.5	169-188	1
miR845a-p3_1	TRINITY_DN32493_c0_g1	TRINITY_DN32493_c0_g1	-	1.5	216-235	1
miR845a-p3_1	TRINITY_DN33051_c1_g4	TRINITY_DN33051_c1_g4	-	2	210-229	1
miR845a-p3_1	TRINITY_DN33051_c1_g3	TRINITY_DN33051_c1_g3	-	2	210-229	1
miR845a-p3_1	TRINITY_DN39666_c0_g1	TRINITY_DN39666_c0_g1	-	3	376-395	1
miR845a-p3_1	TRINITY_DN33156_c6_g25	TRINITY_DN33156_c6_g25	-	3	38-57	1
miR845a-p3_1	TRINITY_DN28064_c0_g1	TRINITY_DN28064_c0_g1	-	3	143-163	1
miR845a-p3_1	TRINITY_DN33096_c1_g6	TRINITY_DN33096_c1_g6	-	3	493-511	1
miR845a-p3_1	TRINITY_DN33083_c0_g5	TRINITY_DN33083_c0_g5	-	3	198-216	1
miR845a-p3_1	TRINITY_DN24675_c0_g1	TRINITY_DN24675_c0_g1	sp|Q1JPL4|NDB1_ARATH NAD(P)H dehydrogenase B1, mitochondrial OS=Arabidopsis thaliana GN=NDB1 PE=1 SV=1	3	915-934	1		ko00190(Oxidative phosphorylation)
miR845a-p3_1	TRINITY_DN16759_c0_g1	TRINITY_DN16759_c0_g1	-	3	985-1003	1
miR845a-p3_1	TRINITY_DN25308_c0_g3	TRINITY_DN25308_c0_g3	-	3.5	130-148	1
miR845a-p3_1	TRINITY_DN17102_c0_g1	TRINITY_DN17102_c0_g1	sp|Q9SXU1|PSA7_CICAR Proteasome subunit alpha type-7 OS=Cicer arietinum GN=PAD1 PE=1 SV=1	3.5	831-849	1	GO:0005737(cytoplasm);GO:0005634(nucleus);GO:0019773(proteasome core complex, alpha-subunit complex);GO:0004298(threonine-type endopeptidase activity);GO:0006511(ubiquitin-dependent protein catabolic process)	ko03050(Proteasome)
miR845a-p3_1	TRINITY_DN31672_c0_g3	TRINITY_DN31672_c0_g3	sp|P51104|DFRA_DIACA Dihydroflavonol-4-reductase OS=Dianthus caryophyllus GN=A PE=2 SV=1	3.5	1376-1395	1	GO:0050662(coenzyme binding);GO:0045552(dihydrokaempferol 4-reductase activity);GO:0009813(flavonoid biosynthetic process)	ko00940(Phenylpropanoid biosynthesis)
miR845a-p3_1	TRINITY_DN38972_c0_g1	TRINITY_DN38972_c0_g1	-	4	228-247	1
miR845a-p3_1	TRINITY_DN10436_c0_g2	TRINITY_DN10436_c0_g2	-	4	418-436	1
miR845a-p3_1	TRINITY_DN8200_c0_g1	TRINITY_DN8200_c0_g1	-	4	60-78	1
miR845a-p3_1	TRINITY_DN19183_c0_g1	TRINITY_DN19183_c0_g1	sp|Q56W08|PLCD3_ARATH Phosphoinositide phospholipase C 3 OS=Arabidopsis thaliana GN=PLC3 PE=2 SV=1	4	1-21	1	GO:0005886(plasma membrane);GO:0005509(calcium ion binding);GO:0004435(phosphatidylinositol phospholipase C activity);GO:0004871(signal transducer activity);GO:0035556(intracellular signal transduction);GO:0016042(lipid catabolic process)	ko00562(Inositol phosphate metabolism);ko04020(Calcium signaling pathway);ko04070(Phosphatidylinositol signaling system)
miR845a-p3_1	TRINITY_DN33096_c1_g2	TRINITY_DN33096_c1_g2	-	4	1980-1999	1
miR845a-p3_1	TRINITY_DN33000_c5_g11	TRINITY_DN33000_c5_g11	-	4	128-147	1
miR845a-p3_1	TRINITY_DN12895_c0_g1	TRINITY_DN12895_c0_g1	sp|P10566|MRS3_YEAST Mitochondrial RNA-splicing protein MRS3 OS=Saccharomyces cerevisiae (strain ATCC 204508 / S288c) GN=MRS3 PE=1 SV=4	4	598-616	1	GO:0016021(integral to membrane);GO:0005743(mitochondrial inner membrane);GO:0005381(iron ion transmembrane transporter activity);GO:0048250(mitochondrial iron ion transport);GO:0006397(mRNA processing);GO:0008380(RNA splicing)
miR845a-p3_1	TRINITY_DN28031_c0_g1	TRINITY_DN28031_c0_g1	sp|O22799|Y2349_ARATH Uncharacterized protein At2g33490 OS=Arabidopsis thaliana GN=At2g33490 PE=1 SV=2	4	1333-1351	1	GO:0005886(plasma membrane)
miR7760-p3_2	TRINITY_DN19742_c0_g1	TRINITY_DN19742_c0_g1	-	0	444-461	1
miR7760-p3_2	TRINITY_DN19742_c0_g2	TRINITY_DN19742_c0_g2	-	0	450-467	1
miR7760-p3_2	TRINITY_DN20945_c0_g1	TRINITY_DN20945_c0_g1	-	0.5	227-244	1
miR7760-p3_2	TRINITY_DN20945_c0_g2	TRINITY_DN20945_c0_g2	-	0.5	504-521	1
miR7760-p3_2	TRINITY_DN18872_c0_g1	TRINITY_DN18872_c0_g1	sp|Q9FDW1|MYB44_ARATH Transcription factor MYB44 OS=Arabidopsis thaliana GN=MYB44 PE=2 SV=1	1	638-655	1	GO:0005634(nucleus);GO:0003677(DNA binding);GO:0009738(abscisic acid mediated signaling pathway);GO:0006355(regulation of transcription, DNA-dependent);GO:0009733(response to auxin stimulus);GO:0046686(response to cadmium ion);GO:0010200(response to chitin);GO:0009723(response to ethylene stimulus);GO:0009739(response to gibberellin stimulus);GO:0009753(response to jasmonic acid stimulus);GO:0009…
miR7760-p3_2	TRINITY_DN13031_c0_g1	TRINITY_DN13031_c0_g1	sp|Q8GZ38|UNE10_ARATH Transcription factor UNE10 OS=Arabidopsis thaliana GN=UNE10 PE=2 SV=1	1	1299-1316	1	GO:0005634(nucleus);GO:0009506(plasmodesma);GO:0003677(DNA binding);GO:0009567(double fertilization forming a zygote and endosperm);GO:0006355(regulation of transcription, DNA-dependent);GO:0006351(transcription, DNA-dependent)	ko04712(Circadian rhythm - plant)
miR7760-p3_2	TRINITY_DN12363_c0_g1	TRINITY_DN12363_c0_g1	sp|Q9C660|PEK10_ARATH Proline-rich receptor-like protein kinase PERK10 OS=Arabidopsis thaliana GN=PERK10 PE=1 SV=2	1.5	172-189	1	GO:0016021(integral to membrane);GO:0005886(plasma membrane);GO:0005524(ATP binding);GO:0004674(protein serine/threonine kinase activity)
miR7760-p3_2	TRINITY_DN28158_c0_g3	TRINITY_DN28158_c0_g3	sp|Q9SK87|ADHL2_ARATH Alcohol dehydrogenase-like 2 OS=Arabidopsis thaliana GN=At1g22440 PE=2 SV=1	1.5	447-464	1	GO:0005829(cytosol);GO:0004022(alcohol dehydrogenase );GO:0008270(zinc ion binding)	ko00010(Glycolysis / Gluconeogenesis);ko00071(Fatty acid metabolism);ko00350(Tyrosine metabolism);ko00624(1- and 2-Methylnaphthalene degradation);ko00641(3-Chloroacrylic acid degradation);ko00680(Methane metabolism);ko00830(Retinol metabolism);ko00980(Metabolism of xenobiotics by cytochrome P450);ko00982(Drug metabolism - cytochrome P450)
miR7760-p3_2	TRINITY_DN12363_c0_g1	TRINITY_DN12363_c0_g1	sp|Q9C660|PEK10_ARATH Proline-rich receptor-like protein kinase PERK10 OS=Arabidopsis thaliana GN=PERK10 PE=1 SV=2	1.5	52-69	1	GO:0016021(integral to membrane);GO:0005886(plasma membrane);GO:0005524(ATP binding);GO:0004674(protein serine/threonine kinase activity)
miR7760-p3_2	TRINITY_DN13031_c0_g1	TRINITY_DN13031_c0_g1	sp|Q8GZ38|UNE10_ARATH Transcription factor UNE10 OS=Arabidopsis thaliana GN=UNE10 PE=2 SV=1	1.5	483-500	1	GO:0005634(nucleus);GO:0009506(plasmodesma);GO:0003677(DNA binding);GO:0009567(double fertilization forming a zygote and endosperm);GO:0006355(regulation of transcription, DNA-dependent);GO:0006351(transcription, DNA-dependent)	ko04712(Circadian rhythm - plant)
miR7760-p3_2	TRINITY_DN32236_c2_g13	TRINITY_DN32236_c2_g13	sp|Q03250|RBG7_ARATH Glycine-rich RNA-binding protein 7 OS=Arabidopsis thaliana GN=RBG7 PE=1 SV=1	2	31-48	1	GO:0009507(chloroplast);GO:0005829(cytosol);GO:0005634(nucleus);GO:0005777(peroxisome);GO:0009506(plasmodesma);GO:0003690(double-stranded DNA binding);GO:0000166(nucleotide binding);GO:0003723(RNA binding);GO:0003697(single-stranded DNA binding);GO:0007623(circadian rhythm);GO:0032508(DNA duplex unwinding);GO:0045087(innate immune response);GO:0006406(mRNA export from nucleus);GO:0010119(regulati…
miR7760-p3_2	TRINITY_DN32236_c2_g3	TRINITY_DN32236_c2_g3	sp|Q03250|RBG7_ARATH Glycine-rich RNA-binding protein 7 OS=Arabidopsis thaliana GN=RBG7 PE=1 SV=1	2	31-48	1	GO:0009507(chloroplast);GO:0005829(cytosol);GO:0005634(nucleus);GO:0005777(peroxisome);GO:0009506(plasmodesma);GO:0003690(double-stranded DNA binding);GO:0000166(nucleotide binding);GO:0003723(RNA binding);GO:0003697(single-stranded DNA binding);GO:0007623(circadian rhythm);GO:0032508(DNA duplex unwinding);GO:0045087(innate immune response);GO:0006406(mRNA export from nucleus);GO:0010119(regulati…
miR7760-p3_2	TRINITY_DN32236_c2_g21	TRINITY_DN32236_c2_g21	sp|Q03250|RBG7_ARATH Glycine-rich RNA-binding protein 7 OS=Arabidopsis thaliana GN=RBG7 PE=1 SV=1	2	31-48	1	GO:0009507(chloroplast);GO:0005829(cytosol);GO:0005634(nucleus);GO:0005777(peroxisome);GO:0009506(plasmodesma);GO:0003690(double-stranded DNA binding);GO:0000166(nucleotide binding);GO:0003723(RNA binding);GO:0003697(single-stranded DNA binding);GO:0007623(circadian rhythm);GO:0032508(DNA duplex unwinding);GO:0045087(innate immune response);GO:0006406(mRNA export from nucleus);GO:0010119(regulati…
miR7760-p3_2	TRINITY_DN32236_c2_g20	TRINITY_DN32236_c2_g20	-	2	171-188	1
miR7760-p3_2	TRINITY_DN4083_c0_g5	TRINITY_DN4083_c0_g5	-	2	51-68	1
miR7760-p3_2	TRINITY_DN4083_c0_g6	TRINITY_DN4083_c0_g6	-	2	51-68	1
miR7760-p3_2	TRINITY_DN4083_c0_g3	TRINITY_DN4083_c0_g3	sp|A4QSS5|DBP2_MAGO7 ATP-dependent RNA helicase DBP2 OS=Magnaporthe oryzae (strain 70-15 / ATCC MYA-4617 / FGSC 8958) GN=DBP2 PE=3 SV=1	2	51-68	1	GO:0005737(cytoplasm);GO:0005634(nucleus);GO:0005524(ATP binding);GO:0008026(ATP-dependent helicase activity);GO:0003723(RNA binding);GO:0000184(nuclear-transcribed mRNA catabolic process, nonsense-mediated decay);GO:0006364(rRNA processing)
miR7760-p3_2	TRINITY_DN4083_c0_g1	TRINITY_DN4083_c0_g1	-	2	51-68	1
miR7760-p3_2	TRINITY_DN4083_c0_g10	TRINITY_DN4083_c0_g10	-	2	51-68	1
miR7760-p3_2	TRINITY_DN30737_c1_g4	TRINITY_DN30737_c1_g4	sp|Q9FUL4|RL24_PRUAV 60S ribosomal protein L24 OS=Prunus avium GN=RPL24 PE=2 SV=1	2	280-297	1	GO:0005840(ribosome);GO:0003735(structural constituent of ribosome);GO:0006412(translation)	ko03010(Ribosome)
miR7760-p3_2	TRINITY_DN30737_c1_g27	TRINITY_DN30737_c1_g27	sp|O65743|RL24_CICAR 60S ribosomal protein L24 OS=Cicer arietinum GN=RPL24 PE=2 SV=1	2	280-297	1	GO:0005840(ribosome);GO:0003735(structural constituent of ribosome);GO:0006412(translation)	ko03010(Ribosome)
miR7760-p3_2	TRINITY_DN30737_c1_g45	TRINITY_DN30737_c1_g45	sp|O65743|RL24_CICAR 60S ribosomal protein L24 OS=Cicer arietinum GN=RPL24 PE=2 SV=1	2	280-297	1	GO:0005840(ribosome);GO:0003735(structural constituent of ribosome);GO:0006412(translation)	ko03010(Ribosome)
miR7760-p3_2	TRINITY_DN11403_c0_g1	TRINITY_DN11403_c0_g1	sp|Q41188|CSP2_ARATH Cold shock protein 2 OS=Arabidopsis thaliana GN=CSP2 PE=1 SV=1	2	809-826	1
miR7760-p3_2	TRINITY_DN25077_c1_g1	TRINITY_DN25077_c1_g1	-	2	306-323	1
miR7760-p3_2	TRINITY_DN23293_c0_g1	TRINITY_DN23293_c0_g1	-	2	200-217	1
miR7760-p3_2	TRINITY_DN23085_c4_g1	TRINITY_DN23085_c4_g1	sp|Q9LK03|PERK2_ARATH Proline-rich receptor-like protein kinase PERK2 OS=Arabidopsis thaliana GN=PERK2 PE=2 SV=3	2	592-609	1	GO:0016021(integral to membrane);GO:0005886(plasma membrane);GO:0005524(ATP binding);GO:0004674(protein serine/threonine kinase activity);GO:0004872(receptor activity)	ko04622(RIG-I-like receptor signaling pathway)
miR7760-p3_2	TRINITY_DN3971_c0_g2	TRINITY_DN3971_c0_g2	-	2	921-938	1
miR7760-p3_2	TRINITY_DN13190_c0_g1	TRINITY_DN13190_c0_g1	sp|P47226|TES_MOUSE Testin OS=Mus musculus GN=Tes PE=1 SV=1	2	493-510	1	GO:0005737(cytoplasm);GO:0005925(focal adhesion);GO:0008270(zinc ion binding);GO:0008285(negative regulation of cell proliferation)
miR7760-p3_2	TRINITY_DN45645_c0_g1	TRINITY_DN45645_c0_g1	sp|P34913|HYES_HUMAN Bifunctional epoxide hydrolase 2 OS=Homo sapiens GN=EPHX2 PE=1 SV=2	2	810-827	1	GO:0005829(cytosol);GO:0005925(focal adhesion);GO:0005794(Golgi apparatus);GO:0005730(nucleolus);GO:0005777(peroxisome);GO:0005625(soluble fraction);GO:0004301(epoxide hydrolase activity);GO:0046872(metal ion binding);GO:0042803(protein homodimerization activity);GO:0019439(aromatic compound catabolic process);GO:0006874(cellular calcium ion homeostasis);GO:0017144(drug metabolic process);GO:0006…
miR7760-p3_2	TRINITY_DN13190_c0_g2	TRINITY_DN13190_c0_g2	sp|P47226|TES_MOUSE Testin OS=Mus musculus GN=Tes PE=1 SV=1	2	505-522	1	GO:0005737(cytoplasm);GO:0005925(focal adhesion);GO:0008270(zinc ion binding);GO:0008285(negative regulation of cell proliferation)
miR7760-p3_2	TRINITY_DN22924_c0_g1	TRINITY_DN22924_c0_g1	sp|Q9M1S8|GCP2_ARATH Probable glutamate carboxypeptidase 2 OS=Arabidopsis thaliana GN=AMP1 PE=1 SV=3	2	78-95	1	GO:0016021(integral to membrane);GO:0046872(metal ion binding);GO:0004181(metallocarboxypeptidase activity);GO:0009790(embryo development);GO:0009908(flower development);GO:0010305(leaf vascular tissue pattern formation);GO:0009640(photomorphogenesis);GO:0006508(proteolysis);GO:0010080(regulation of floral meristem growth);GO:0010081(regulation of inflorescence meristem growth);GO:0010082(regulat…
miR7760-p3_2	TRINITY_DN30664_c1_g1	TRINITY_DN30664_c1_g1	sp|Q9XIK3|ISCAP_ARATH Iron-sulfur assembly protein IscA, chloroplastic OS=Arabidopsis thaliana GN=ISCA PE=2 SV=2	2	471-488	1	GO:0009570(chloroplast stroma);GO:0051536(iron-sulfur cluster binding);GO:0046872(metal ion binding);GO:0005198(structural molecule activity);GO:0016226(iron-sulfur cluster assembly)
miR7760-p3_2	TRINITY_DN28267_c0_g9	TRINITY_DN28267_c0_g9	-	2	769-786	1
miR7760-p3_2	TRINITY_DN26545_c0_g1	TRINITY_DN26545_c0_g1	sp|Q6PKG0|LARP1_HUMAN La-related protein 1 OS=Homo sapiens GN=LARP1 PE=1 SV=2	2	2047-2064	1	GO:0003723(RNA binding)
miR7760-p3_2	TRINITY_DN30664_c0_g1	TRINITY_DN30664_c0_g1	-	2	2151-2168	1
miR7760-p3_2	TRINITY_DN24705_c1_g1	TRINITY_DN24705_c1_g1	sp|Q94C69|CSP3_ARATH Cold shock domain-containing protein 3 OS=Arabidopsis thaliana GN=CSP3 PE=2 SV=1	2	671-688	1
miR7760-p3_2	TRINITY_DN14409_c0_g1	TRINITY_DN14409_c0_g1	-	2	91-108	1
miR7760-p3_2	TRINITY_DN17779_c0_g1	TRINITY_DN17779_c0_g1	sp|Q8LPR5|TCP4_ARATH Transcription factor TCP4 OS=Arabidopsis thaliana GN=TCP4 PE=2 SV=1	2	819-836	1	GO:0005634(nucleus);GO:0003677(DNA binding);GO:0009793(embryo development ending in seed dormancy);GO:0048366(leaf development);GO:0006355(regulation of transcription, DNA-dependent);GO:0006351(transcription, DNA-dependent)
miR7760-p3_2	TRINITY_DN23813_c0_g1	TRINITY_DN23813_c0_g1	sp|Q43848|TKTC_SOLTU Transketolase, chloroplastic OS=Solanum tuberosum PE=2 SV=1	2	2422-2439	1	GO:0009535(chloroplast thylakoid membrane);GO:0046872(metal ion binding);GO:0004802(transketolase activity)	ko00030(Pentose phosphate pathway);ko00710(Carbon fixation in photosynthetic organisms);ko01051(Biosynthesis of ansamycins)
miR7760-p3_2	TRINITY_DN32358_c1_g1	TRINITY_DN32358_c1_g1	sp|Q9STW6|HSP7F_ARATH Heat shock 70 kDa protein 6, chloroplastic OS=Arabidopsis thaliana GN=HSP70-6 PE=1 SV=1	2	2365-2382	1		ko03040(Spliceosome);ko04010(MAPK signaling pathway);ko04144(Endocytosis);ko04612(Antigen processing and presentation)
miR7760-p3_2	TRINITY_DN23119_c0_g1	TRINITY_DN23119_c0_g1	-	2	341-358	1
miR7760-p3_2	TRINITY_DN29563_c1_g1	TRINITY_DN29563_c1_g1	sp|Q8GXL7|GAT24_ARATH GATA transcription factor 24 OS=Arabidopsis thaliana GN=GATA24 PE=2 SV=2	2	1333-1350	1	GO:0005634(nucleus);GO:0043565(sequence-specific DNA binding);GO:0003700(sequence-specific DNA binding transcription factor activity);GO:0008270(zinc ion binding)	ko04712(Circadian rhythm - plant)
miR7760-p3_2	TRINITY_DN28310_c0_g1	TRINITY_DN28310_c0_g1	sp|O65020|ETO1_ARATH Ethylene-overproduction protein 1 OS=Arabidopsis thaliana GN=ETO1 PE=1 SV=2	2	3456-3473	1	GO:0030674(protein binding, bridging);GO:0009873(ethylene mediated signaling pathway);GO:0043161(proteasomal ubiquitin-dependent protein catabolic process);GO:0010364(regulation of ethylene biosynthetic process);GO:2000069(regulation of post-embryonic root development);GO:0017145(stem cell division);GO:0010182(sugar mediated signaling pathway)
miR7760-p3_2	TRINITY_DN21054_c0_g2	TRINITY_DN21054_c0_g2	sp|Q9SEU4|SR33_ARATH Serine/arginine-rich splicing factor 33 OS=Arabidopsis thaliana GN=SR33 PE=1 SV=1	2	2464-2481	1
miR7760-p3_2	TRINITY_DN28190_c1_g1	TRINITY_DN28190_c1_g1	-	2.5	40-57	1
miR7760-p3_2	TRINITY_DN25017_c0_g2	TRINITY_DN25017_c0_g2	-	2.5	772-789	1
miR7760-p3_2	TRINITY_DN27946_c0_g1	TRINITY_DN27946_c0_g1	sp|P0CH30|RING1_GOSHI E3 ubiquitin-protein ligase RING1 OS=Gossypium hirsutum GN=RING1 PE=2 SV=1	2.5	1407-1424	1	GO:0016874(ligase activity);GO:0008270(zinc ion binding)
miR7760-p3_2	TRINITY_DN29914_c1_g1	TRINITY_DN29914_c1_g1	-	2.5	337-354	1
miR7760-p3_2	TRINITY_DN22827_c0_g1	TRINITY_DN22827_c0_g1	sp|Q6AWY4|GRF5_ORYSJ Growth-regulating factor 5 OS=Oryza sativa subsp. japonica GN=GRF5 PE=2 SV=1	2.5	1239-1256	1
miR7760-p3_2	TRINITY_DN15009_c0_g1	TRINITY_DN15009_c0_g1	sp|Q9SS80|U503A_ARATH UPF0503 protein At3g09070, chloroplastic OS=Arabidopsis thaliana GN=At3g09070 PE=1 SV=1	2.5	310-327	1	GO:0009507(chloroplast);GO:0005886(plasma membrane)
miR7760-p3_2	TRINITY_DN14879_c0_g1	TRINITY_DN14879_c0_g1	sp|Q9LDE4|ERF83_ARATH Ethylene-responsive transcription factor 7 OS=Arabidopsis thaliana GN=ERF7 PE=1 SV=1	2.5	1021-1038	1	GO:0005634(nucleus);GO:0005515(protein binding);GO:0043565(sequence-specific DNA binding);GO:0003700(sequence-specific DNA binding transcription factor activity);GO:0006952(defense response);GO:0009873(ethylene mediated signaling pathway);GO:0045892(negative regulation of transcription, DNA-dependent);GO:0009737(response to abscisic acid stimulus);GO:0009414(response to water deprivation)
miR7760-p3_2	TRINITY_DN20418_c0_g1	TRINITY_DN20418_c0_g1	-	2.5	913-930	1
miR7760-p3_2	TRINITY_DN25388_c0_g1	TRINITY_DN25388_c0_g1	sp|Q9FT81|TT8_ARATH Transcription factor TT8 OS=Arabidopsis thaliana GN=TT8 PE=1 SV=2	2.5	562-580	1	GO:0005634(nucleus);GO:0003677(DNA binding);GO:0005515(protein binding);GO:0009813(flavonoid biosynthetic process);GO:2000029(regulation of proanthocyanidin biosynthetic process);GO:0006355(regulation of transcription, DNA-dependent);GO:0006351(transcription, DNA-dependent);GO:0010026(trichome differentiation)
miR7760-p3_2	TRINITY_DN19783_c0_g1	TRINITY_DN19783_c0_g1	sp|P27322|HSP72_SOLLC Heat shock cognate 70 kDa protein 2 OS=Solanum lycopersicum GN=HSC-2 PE=1 SV=1	2.5	272-289	1	GO:0005524(ATP binding);GO:0006950(response to stress)	ko03040(Spliceosome);ko04010(MAPK signaling pathway);ko04144(Endocytosis);ko04612(Antigen processing and presentation)
miR7760-p3_2	TRINITY_DN28143_c2_g1	TRINITY_DN28143_c2_g1	sp|Q9SW80|BLH2_ARATH BEL1-like homeodomain protein 2 OS=Arabidopsis thaliana GN=BLH2 PE=1 SV=3	2.5	1496-1513	1	GO:0005634(nucleus);GO:0043565(sequence-specific DNA binding);GO:0003700(sequence-specific DNA binding transcription factor activity);GO:0009965(leaf morphogenesis)
miR7760-p3_2	TRINITY_DN29769_c1_g1	TRINITY_DN29769_c1_g1	sp|P59278|Y1745_ARATH Uncharacterized protein At1g51745 OS=Arabidopsis thaliana GN=At1g51745 PE=2 SV=2	2.5	653-670	1
miR7760-p3_2	TRINITY_DN33089_c0_g1	TRINITY_DN33089_c0_g1	sp|Q38953|DHX8_ARATH Probable pre-mRNA-splicing factor ATP-dependent RNA helicase OS=Arabidopsis thaliana GN=At3g26560 PE=1 SV=2	2.5	3561-3578	1	GO:0005829(cytosol);GO:0005739(mitochondrion);GO:0005634(nucleus);GO:0009506(plasmodesma);GO:0005524(ATP binding);GO:0008026(ATP-dependent helicase activity);GO:0003723(RNA binding);GO:0006397(mRNA processing);GO:0008380(RNA splicing)	ko00230(Purine metabolism)
miR7760-p3_2	TRINITY_DN24705_c1_g1	TRINITY_DN24705_c1_g1	sp|Q94C69|CSP3_ARATH Cold shock domain-containing protein 3 OS=Arabidopsis thaliana GN=CSP3 PE=2 SV=1	2.5	500-517	1
miR7760-p3_2	TRINITY_DN48124_c0_g1	TRINITY_DN48124_c0_g1	-	3	194-211	1
miR7760-p3_2	TRINITY_DN17355_c0_g1	TRINITY_DN17355_c0_g1	-	3	228-245	1
miR7760-p3_2	TRINITY_DN12113_c0_g1	TRINITY_DN12113_c0_g1	-	3	106-123	1
miR7760-p3_2	TRINITY_DN32236_c2_g30	TRINITY_DN32236_c2_g30	sp|Q03878|GRP1_DAUCA Glycine-rich RNA-binding protein OS=Daucus carota PE=2 SV=1	3	186-203	1	GO:0000166(nucleotide binding);GO:0003723(RNA binding)
miR7760-p3_2	TRINITY_DN32236_c2_g8	TRINITY_DN32236_c2_g8	sp|Q9LK03|PERK2_ARATH Proline-rich receptor-like protein kinase PERK2 OS=Arabidopsis thaliana GN=PERK2 PE=2 SV=3	3	186-203	1	GO:0016021(integral to membrane);GO:0005886(plasma membrane);GO:0005524(ATP binding);GO:0004674(protein serine/threonine kinase activity);GO:0004872(receptor activity)
miR7760-p3_2	TRINITY_DN32236_c2_g23	TRINITY_DN32236_c2_g23	sp|Q03878|GRP1_DAUCA Glycine-rich RNA-binding protein OS=Daucus carota PE=2 SV=1	3	186-203	1	GO:0000166(nucleotide binding);GO:0003723(RNA binding)
miR7760-p3_2	TRINITY_DN21228_c0_g2	TRINITY_DN21228_c0_g2	-	3	49-66	1
miR7760-p3_2	TRINITY_DN40655_c0_g1	TRINITY_DN40655_c0_g1	-	3	290-307	1
miR7760-p3_2	TRINITY_DN21228_c0_g4	TRINITY_DN21228_c0_g4	-	3	49-66	1
miR7760-p3_2	TRINITY_DN21228_c0_g1	TRINITY_DN21228_c0_g1	sp|O15047|SET1A_HUMAN Histone-lysine N-methyltransferase SETD1A OS=Homo sapiens GN=SETD1A PE=1 SV=3	3	49-66	1	GO:0005694(chromosome);GO:0016607(nuclear speck);GO:0048188(Set1C/COMPASS complex);GO:0042800(histone methyltransferase activity );GO:0000166(nucleotide binding);GO:0005515(protein binding);GO:0003723(RNA binding);GO:0006355(regulation of transcription, DNA-dependent);GO:0006351(transcription, DNA-dependent)
miR7760-p3_2	TRINITY_DN21228_c0_g3	TRINITY_DN21228_c0_g3	-	3	49-66	1
miR7760-p3_2	TRINITY_DN4083_c0_g7	TRINITY_DN4083_c0_g7	-	3	5-22	1
miR7760-p3_2	TRINITY_DN4083_c0_g2	TRINITY_DN4083_c0_g2	-	3	5-22	1
miR7760-p3_2	TRINITY_DN4083_c0_g11	TRINITY_DN4083_c0_g11	-	3	5-22	1
miR7760-p3_2	TRINITY_DN4083_c0_g4	TRINITY_DN4083_c0_g4	-	3	5-22	1
miR7760-p3_2	TRINITY_DN4083_c0_g9	TRINITY_DN4083_c0_g9	-	3	5-22	1
miR7760-p3_2	TRINITY_DN4083_c0_g8	TRINITY_DN4083_c0_g8	-	3	5-22	1
miR7760-p3_2	TRINITY_DN12013_c0_g2	TRINITY_DN12013_c0_g2	-	3	348-365	1
miR7760-p3_2	TRINITY_DN12013_c0_g3	TRINITY_DN12013_c0_g3	-	3	348-365	1
miR7760-p3_2	TRINITY_DN12013_c0_g1	TRINITY_DN12013_c0_g1	-	3	349-366	1
miR7760-p3_2	TRINITY_DN44351_c0_g1	TRINITY_DN44351_c0_g1	-	3	77-94	1
miR7760-p3_2	TRINITY_DN3069_c78_g1	TRINITY_DN3069_c78_g1	-	3	150-167	1
miR7760-p3_2	TRINITY_DN33899_c0_g1	TRINITY_DN33899_c0_g1	-	3	300-317	1
miR7760-p3_2	TRINITY_DN37993_c0_g1	TRINITY_DN37993_c0_g1	-	3	229-246	1
miR7760-p3_2	TRINITY_DN44948_c0_g1	TRINITY_DN44948_c0_g1	-	3	55-72	1
miR7760-p3_2	TRINITY_DN3034_c0_g1	TRINITY_DN3034_c0_g1	sp|Q9S7C9|ESCA_ARATH Putative DNA-binding protein ESCAROLA OS=Arabidopsis thaliana GN=ESC PE=2 SV=1	3	307-324	1	GO:0005634(nucleus);GO:0003680(AT DNA binding);GO:0003690(double-stranded DNA binding);GO:0006325(chromatin organization);GO:0010150(leaf senescence);GO:0009640(photomorphogenesis)
miR7760-p3_2	TRINITY_DN36238_c0_g1	TRINITY_DN36238_c0_g1	-	3	85-102	1
miR7760-p3_2	TRINITY_DN31940_c92_g1	TRINITY_DN31940_c92_g1	sp|Q9LK03|PERK2_ARATH Proline-rich receptor-like protein kinase PERK2 OS=Arabidopsis thaliana GN=PERK2 PE=2 SV=3	3	291-308	1	GO:0016021(integral to membrane);GO:0005886(plasma membrane);GO:0005524(ATP binding);GO:0004674(protein serine/threonine kinase activity);GO:0004872(receptor activity)
miR7760-p3_2	TRINITY_DN30028_c0_g1	TRINITY_DN30028_c0_g1	sp|Q9SS80|U503A_ARATH UPF0503 protein At3g09070, chloroplastic OS=Arabidopsis thaliana GN=At3g09070 PE=1 SV=1	3	510-527	1	GO:0009507(chloroplast);GO:0005886(plasma membrane)
miR7760-p3_2	TRINITY_DN18002_c1_g1	TRINITY_DN18002_c1_g1	-	3	207-224	1
miR7760-p3_2	TRINITY_DN10108_c0_g1	TRINITY_DN10108_c0_g1	sp|Q9M0R0|BH081_ARATH Transcription factor bHLH81 OS=Arabidopsis thaliana GN=BHLH81 PE=2 SV=1	3	960-977	1	GO:0005634(nucleus);GO:0003677(DNA binding);GO:0006355(regulation of transcription, DNA-dependent);GO:0006351(transcription, DNA-dependent)
miR7760-p3_2	TRINITY_DN23938_c1_g1	TRINITY_DN23938_c1_g1	-	3	403-420	1
miR7760-p3_2	TRINITY_DN21272_c0_g1	TRINITY_DN21272_c0_g1	sp|Q69RG7|4CLL7_ORYSJ 4-coumarate--CoA ligase-like 7 OS=Oryza sativa subsp. japonica GN=4CLL7 PE=2 SV=1	3	332-350	1	GO:0005524(ATP binding);GO:0016874(ligase activity)	ko00130(Ubiquinone and other terpenoid-quinone biosynthesis);ko00360(Phenylalanine metabolism);ko00940(Phenylpropanoid biosynthesis)
miR7760-p3_2	TRINITY_DN24446_c0_g1	TRINITY_DN24446_c0_g1	sp|Q9FGT7|ARR18_ARATH Two-component response regulator ARR18 OS=Arabidopsis thaliana GN=ARR18 PE=2 SV=2	3	801-818	1	GO:0005634(nucleus);GO:0003677(DNA binding);GO:0000156(two-component response regulator activity);GO:0009736(cytokinin mediated signaling pathway);GO:0006355(regulation of transcription, DNA-dependent);GO:0006351(transcription, DNA-dependent)
miR7760-p3_2	TRINITY_DN11883_c0_g1	TRINITY_DN11883_c0_g1	-	3	7-24	1
miR7760-p3_2	TRINITY_DN20890_c0_g1	TRINITY_DN20890_c0_g1	sp|Q9SR33|ORP3B_ARATH Oxysterol-binding protein-related protein 3B OS=Arabidopsis thaliana GN=ORP3B PE=2 SV=1	3	1470-1487	1	GO:0005829(cytosol);GO:0008289(lipid binding);GO:0006869(lipid transport)
miR7760-p3_2	TRINITY_DN10956_c0_g1	TRINITY_DN10956_c0_g1	sp|P46604|HAT22_ARATH Homeobox-leucine zipper protein HAT22 OS=Arabidopsis thaliana GN=HAT22 PE=1 SV=1	3	820-837	1	GO:0005634(nucleus);GO:0043565(sequence-specific DNA binding);GO:0003700(sequence-specific DNA binding transcription factor activity);GO:0009735(response to cytokinin stimulus)
miR7760-p3_2	TRINITY_DN32225_c2_g1	TRINITY_DN32225_c2_g1	sp|Q69UP6|AGO18_ORYSJ Protein argonaute 18 OS=Oryza sativa subsp. japonica GN=AGO18 PE=2 SV=1	3	161-178	1	GO:0003676(nucleic acid binding);GO:0031047(gene silencing by RNA)
miR7760-p3_2	TRINITY_DN27995_c0_g1	TRINITY_DN27995_c0_g1	sp|B9GXD6|CSPLO_POPTR CASP-like protein POPTRDRAFT_553757 OS=Populus trichocarpa GN=POPTRDRAFT_553757 PE=3 SV=1	3	756-773	1	GO:0016021(integral to membrane);GO:0005886(plasma membrane)
miR7760-p3_2	TRINITY_DN31868_c1_g1	TRINITY_DN31868_c1_g1	sp|Q8DM63|PYRH_THEEB Uridylate kinase OS=Thermosynechococcus elongatus (strain BP-1) GN=pyrH PE=3 SV=1	3	1417-1434	1	GO:0005737(cytoplasm);GO:0005524(ATP binding);GO:0033862(UMP kinase activity);GO:0008652(cellular amino acid biosynthetic process);GO:0006221(pyrimidine nucleotide biosynthetic process)	ko00240(Pyrimidine metabolism)
miR7760-p3_2	TRINITY_DN18225_c0_g1	TRINITY_DN18225_c0_g1	-	3	357-374	1
miR7760-p3_2	TRINITY_DN10956_c0_g2	TRINITY_DN10956_c0_g2	sp|P46604|HAT22_ARATH Homeobox-leucine zipper protein HAT22 OS=Arabidopsis thaliana GN=HAT22 PE=1 SV=1	3	820-837	1	GO:0005634(nucleus);GO:0043565(sequence-specific DNA binding);GO:0003700(sequence-specific DNA binding transcription factor activity);GO:0009735(response to cytokinin stimulus)
miR7760-p3_2	TRINITY_DN3966_c0_g1	TRINITY_DN3966_c0_g1	sp|Q9LK03|PERK2_ARATH Proline-rich receptor-like protein kinase PERK2 OS=Arabidopsis thaliana GN=PERK2 PE=2 SV=3	3	462-479	1	GO:0016021(integral to membrane);GO:0005886(plasma membrane);GO:0005524(ATP binding);GO:0004674(protein serine/threonine kinase activity);GO:0004872(receptor activity)
miR7760-p3_2	TRINITY_DN10851_c0_g1	TRINITY_DN10851_c0_g1	sp|Q5EAE9|ATL43_ARATH RING-H2 finger protein ATL43 OS=Arabidopsis thaliana GN=ATL43 PE=2 SV=2	3	502-519	1	GO:0016021(integral to membrane);GO:0008270(zinc ion binding)
miR7760-p3_2	TRINITY_DN2826_c0_g1	TRINITY_DN2826_c0_g1	sp|Q9C660|PEK10_ARATH Proline-rich receptor-like protein kinase PERK10 OS=Arabidopsis thaliana GN=PERK10 PE=1 SV=2	3	189-206	1	GO:0016021(integral to membrane);GO:0005886(plasma membrane);GO:0005524(ATP binding);GO:0004674(protein serine/threonine kinase activity)
miR7760-p3_2	TRINITY_DN2826_c0_g2	TRINITY_DN2826_c0_g2	-	3	189-206	1
miR7760-p3_2	TRINITY_DN2826_c0_g3	TRINITY_DN2826_c0_g3	sp|Q9C660|PEK10_ARATH Proline-rich receptor-like protein kinase PERK10 OS=Arabidopsis thaliana GN=PERK10 PE=1 SV=2	3	189-206	1	GO:0016021(integral to membrane);GO:0005886(plasma membrane);GO:0005524(ATP binding);GO:0004674(protein serine/threonine kinase activity)
miR7760-p3_2	TRINITY_DN18449_c0_g1	TRINITY_DN18449_c0_g1	sp|Q9LK03|PERK2_ARATH Proline-rich receptor-like protein kinase PERK2 OS=Arabidopsis thaliana GN=PERK2 PE=2 SV=3	3	75-92	1	GO:0016021(integral to membrane);GO:0005886(plasma membrane);GO:0005524(ATP binding);GO:0004674(protein serine/threonine kinase activity);GO:0004872(receptor activity)
miR7760-p3_2	TRINITY_DN12615_c0_g1	TRINITY_DN12615_c0_g1	-	3	2016-2033	1
miR7760-p3_2	TRINITY_DN30026_c0_g1	TRINITY_DN30026_c0_g1	-	3	425-442	1
miR7760-p3_2	TRINITY_DN26371_c1_g1	TRINITY_DN26371_c1_g1	sp|Q8LPN7|RNG1L_ARATH E3 ubiquitin-protein ligase RING1-like OS=Arabidopsis thaliana GN=At3g19950 PE=2 SV=1	3	1876-1893	1	GO:0016874(ligase activity);GO:0008270(zinc ion binding)
miR7760-p3_2	TRINITY_DN2826_c0_g4	TRINITY_DN2826_c0_g4	sp|Q9C660|PEK10_ARATH Proline-rich receptor-like protein kinase PERK10 OS=Arabidopsis thaliana GN=PERK10 PE=1 SV=2	3	189-206	1	GO:0016021(integral to membrane);GO:0005886(plasma membrane);GO:0005524(ATP binding);GO:0004674(protein serine/threonine kinase activity)
miR7760-p3_2	TRINITY_DN45677_c1_g1	TRINITY_DN45677_c1_g1	sp|Q8VZF1|AEE7_ARATH Acetate/butyrate--CoA ligase AAE7, peroxisomal OS=Arabidopsis thaliana GN=AAE7 PE=1 SV=1	3	1887-1904	1		ko00071(Fatty acid metabolism);ko03320(PPAR signaling pathway);ko04146(Peroxisome);ko04920(Adipocytokine signaling pathway)
miR7760-p3_2	TRINITY_DN26104_c1_g1	TRINITY_DN26104_c1_g1	sp|Q9FPR3|EDR1_ARATH Serine/threonine-protein kinase EDR1 OS=Arabidopsis thaliana GN=EDR1 PE=1 SV=1	3	2237-2254	1		ko04010(MAPK signaling pathway);ko04530(Tight junction)
miR7760-p3_2	TRINITY_DN28221_c2_g2	TRINITY_DN28221_c2_g2	sp|O22315|SRSF1_ARATH Pre-mRNA-splicing factor SF2 OS=Arabidopsis thaliana GN=SF2 PE=1 SV=1	3	834-851	1	GO:0035061(interchromatin granule);GO:0016607(nuclear speck);GO:0000166(nucleotide binding);GO:0005515(protein binding);GO:0003723(RNA binding);GO:0006397(mRNA processing);GO:0008380(RNA splicing)
miR7760-p3_2	TRINITY_DN26488_c0_g2	TRINITY_DN26488_c0_g2	sp|Q2VZE7|APAG_MAGSA Protein ApaG OS=Magnetospirillum magneticum (strain AMB-1 / ATCC 700264) GN=apaG PE=3 SV=1	3	994-1011	1
miR7760-p3_2	TRINITY_DN17057_c0_g2	TRINITY_DN17057_c0_g2	-	3	232-249	1
miR7760-p3_2	TRINITY_DN6298_c0_g2	TRINITY_DN6298_c0_g2	sp|Q9SX31|PERK9_ARATH Proline-rich receptor-like protein kinase PERK9 OS=Arabidopsis thaliana GN=PERK9 PE=2 SV=1	3	479-496	1	GO:0016021(integral to membrane);GO:0005886(plasma membrane);GO:0005524(ATP binding);GO:0004674(protein serine/threonine kinase activity)
miR7760-p3_2	TRINITY_DN23538_c0_g1	TRINITY_DN23538_c0_g1	sp|Q7XA87|FOLT1_ARATH Folate transporter 1, chloroplastic OS=Arabidopsis thaliana GN=FOLT1 PE=2 SV=1	3	1543-1560	1
miR7760-p3_2	TRINITY_DN27862_c0_g1	TRINITY_DN27862_c0_g1	sp|Q944H5|MTM1_ARATH Mitochondrial carrier protein MTM1 OS=Arabidopsis thaliana GN=MTM1 PE=2 SV=1	3	1811-1828	1
miR7760-p3_2	TRINITY_DN28995_c0_g1	TRINITY_DN28995_c0_g1	sp|Q2MHE4|HT1_ARATH Serine/threonine-protein kinase HT1 OS=Arabidopsis thaliana GN=HT1 PE=1 SV=1	3	1880-1897	1	GO:0005524(ATP binding);GO:0004674(protein serine/threonine kinase activity);GO:0010119(regulation of stomatal movement)
miR7760-p3_2	TRINITY_DN30883_c1_g5	TRINITY_DN30883_c1_g5	sp|Q9LK03|PERK2_ARATH Proline-rich receptor-like protein kinase PERK2 OS=Arabidopsis thaliana GN=PERK2 PE=2 SV=3	3	248-265	1	GO:0016021(integral to membrane);GO:0005886(plasma membrane);GO:0005524(ATP binding);GO:0004674(protein serine/threonine kinase activity);GO:0004872(receptor activity)
miR7760-p3_2	TRINITY_DN24375_c0_g1	TRINITY_DN24375_c0_g1	-	3	318-335	1
miR7760-p3_2	TRINITY_DN24454_c1_g1	TRINITY_DN24454_c1_g1	sp|P09444|LEA34_GOSHI Late embryogenesis abundant protein D-34 OS=Gossypium hirsutum PE=4 SV=1	3	1885-1902	1
miR7760-p3_2	TRINITY_DN21074_c0_g1	TRINITY_DN21074_c0_g1	sp|P56724|RLA3_ORYSJ 60S acidic ribosomal protein P3 OS=Oryza sativa subsp. japonica GN=Os06g0701400 PE=2 SV=3	3	385-402	1	GO:0003735(structural constituent of ribosome);GO:0006414(translational elongation)	ko03010(Ribosome)
miR7760-p3_2	TRINITY_DN29388_c0_g1	TRINITY_DN29388_c0_g1	sp|Q944A7|Y4523_ARATH Probable serine/threonine-protein kinase At4g35230 OS=Arabidopsis thaliana GN=At4g35230 PE=1 SV=1	3	1475-1492	1	GO:0005886(plasma membrane);GO:0009506(plasmodesma);GO:0005773(vacuole);GO:0005524(ATP binding);GO:0005515(protein binding);GO:0004674(protein serine/threonine kinase activity);GO:0009742(brassinosteroid mediated signaling pathway);GO:0009737(response to abscisic acid stimulus)
miR7760-p3_2	TRINITY_DN11381_c0_g1	TRINITY_DN11381_c0_g1	-	3	2279-2296	1
miR7760-p3_2	TRINITY_DN30092_c1_g1	TRINITY_DN30092_c1_g1	sp|Q9FKK6|EXO5_ARATH Exonuclease V, chloroplastic OS=Arabidopsis thaliana GN=At5g60370 PE=2 SV=1	3	1211-1228	1
miR7760-p3_2	TRINITY_DN7167_c0_g2	TRINITY_DN7167_c0_g2	sp|Q6S004|KIF6_DICDI Kinesin-related protein 6 OS=Dictyostelium discoideum GN=kif6 PE=2 SV=1	3	1185-1202	1	GO:0005813(centrosome);GO:0005874(microtubule);GO:0005524(ATP binding);GO:0003777(microtubule motor activity);GO:0007018(microtubule-based movement);GO:0006810(transport)
miR7760-p3_2	TRINITY_DN31294_c2_g1	TRINITY_DN31294_c2_g1	sp|Q9P0P0|RN181_HUMAN E3 ubiquitin-protein ligase RNF181 OS=Homo sapiens GN=RNF181 PE=1 SV=1	3	476-493	1	GO:0016874(ligase activity);GO:0008270(zinc ion binding)
miR7760-p3_2	TRINITY_DN29668_c1_g3	TRINITY_DN29668_c1_g3	-	3	953-970	1
miR7760-p3_2	TRINITY_DN2172_c0_g1	TRINITY_DN2172_c0_g1	-	3	1116-1133	1
miR7760-p3_2	TRINITY_DN15411_c0_g1	TRINITY_DN15411_c0_g1	sp|Q9LUG9|MD33A_ARATH Mediator of RNA polymerase II transcription subunit 33A OS=Arabidopsis thaliana GN=MED33A PE=1 SV=1	3	1460-1477	1
miR7760-p3_2	TRINITY_DN21704_c0_g1	TRINITY_DN21704_c0_g1	sp|Q56X72|RTNLS_ARATH Reticulon-like protein B21 OS=Arabidopsis thaliana GN=RTNLB21 PE=2 SV=2	3	1841-1858	1	GO:0005789(endoplasmic reticulum membrane);GO:0016021(integral to membrane)
miR7760-p3_2	TRINITY_DN28895_c2_g1	TRINITY_DN28895_c2_g1	sp|Q9J579|DCK2_FOWPN Probable deoxycytidine kinase FPV151 OS=Fowlpox virus (strain NVSL) GN=FPV151 PE=3 SV=1	3	1594-1611	1	GO:0005524(ATP binding);GO:0004137(deoxycytidine kinase activity);GO:0016773(phosphotransferase activity, alcohol group as acceptor)	ko00230(Purine metabolism);ko00240(Pyrimidine metabolism)
miR7760-p3_2	TRINITY_DN32417_c0_g1	TRINITY_DN32417_c0_g1	-	3	3841-3858	1
miR7760-p3_2	TRINITY_DN24109_c1_g1	TRINITY_DN24109_c1_g1	-	3	1375-1392	1
miR7760-p3_2	TRINITY_DN19312_c1_g1	TRINITY_DN19312_c1_g1	sp|O81126|RZP22_ARATH Serine/arginine-rich splicing factor RSZ22 OS=Arabidopsis thaliana GN=RSZ22 PE=1 SV=1	3	1884-1901	1
miR7760-p3_2	TRINITY_DN24728_c0_g1	TRINITY_DN24728_c0_g1	sp|Q9M2U1|DOF36_ARATH Dof zinc finger protein DOF3.6 OS=Arabidopsis thaliana GN=DOF3.6 PE=1 SV=2	3	1213-1230	1	GO:0005634(nucleus);GO:0003677(DNA binding);GO:0003700(sequence-specific DNA binding transcription factor activity);GO:0008270(zinc ion binding);GO:0009640(photomorphogenesis);GO:0045893(positive regulation of transcription, DNA-dependent)
miR7760-p3_2	TRINITY_DN5366_c2_g1	TRINITY_DN5366_c2_g1	sp|P43644|DNJH_ATRNU DnaJ protein homolog ANJ1 OS=Atriplex nummularia PE=2 SV=1	3	974-991	1	GO:0016020(membrane);GO:0005524(ATP binding);GO:0031072(heat shock protein binding);GO:0046872(metal ion binding);GO:0051082(unfolded protein binding);GO:0006457(protein folding);GO:0009408(response to heat)
miR7760-p3_2	TRINITY_DN29334_c1_g1	TRINITY_DN29334_c1_g1	-	3	2615-2632	1
miR7760-p3_2	TRINITY_DN26386_c0_g1	TRINITY_DN26386_c0_g1	-	3	3113-3130	1
miR7760-p3_2	TRINITY_DN4083_c0_g10	TRINITY_DN4083_c0_g10	-	3	78-95	1
miR7760-p3_2	TRINITY_DN4083_c0_g3	TRINITY_DN4083_c0_g3	sp|A4QSS5|DBP2_MAGO7 ATP-dependent RNA helicase DBP2 OS=Magnaporthe oryzae (strain 70-15 / ATCC MYA-4617 / FGSC 8958) GN=DBP2 PE=3 SV=1	3	69-86	1	GO:0005737(cytoplasm);GO:0005634(nucleus);GO:0005524(ATP binding);GO:0008026(ATP-dependent helicase activity);GO:0003723(RNA binding);GO:0000184(nuclear-transcribed mRNA catabolic process, nonsense-mediated decay);GO:0006364(rRNA processing)
miR7760-p3_2	TRINITY_DN4083_c0_g1	TRINITY_DN4083_c0_g1	-	3	75-92	1
miR7760-p3_2	TRINITY_DN10956_c0_g1	TRINITY_DN10956_c0_g1	sp|P46604|HAT22_ARATH Homeobox-leucine zipper protein HAT22 OS=Arabidopsis thaliana GN=HAT22 PE=1 SV=1	3	174-191	1	GO:0005634(nucleus);GO:0043565(sequence-specific DNA binding);GO:0003700(sequence-specific DNA binding transcription factor activity);GO:0009735(response to cytokinin stimulus)
miR7760-p3_2	TRINITY_DN13190_c0_g2	TRINITY_DN13190_c0_g2	sp|P47226|TES_MOUSE Testin OS=Mus musculus GN=Tes PE=1 SV=1	3	523-540	1	GO:0005737(cytoplasm);GO:0005925(focal adhesion);GO:0008270(zinc ion binding);GO:0008285(negative regulation of cell proliferation)
miR7760-p3_2	TRINITY_DN26545_c0_g1	TRINITY_DN26545_c0_g1	sp|Q6PKG0|LARP1_HUMAN La-related protein 1 OS=Homo sapiens GN=LARP1 PE=1 SV=2	3	2065-2082	1	GO:0003723(RNA binding)
miR7760-p3_2	TRINITY_DN32225_c2_g1	TRINITY_DN32225_c2_g1	sp|Q69UP6|AGO18_ORYSJ Protein argonaute 18 OS=Oryza sativa subsp. japonica GN=AGO18 PE=2 SV=1	3	293-310	1	GO:0003676(nucleic acid binding);GO:0031047(gene silencing by RNA)
miR7760-p3_2	TRINITY_DN10956_c0_g2	TRINITY_DN10956_c0_g2	sp|P46604|HAT22_ARATH Homeobox-leucine zipper protein HAT22 OS=Arabidopsis thaliana GN=HAT22 PE=1 SV=1	3	174-191	1	GO:0005634(nucleus);GO:0043565(sequence-specific DNA binding);GO:0003700(sequence-specific DNA binding transcription factor activity);GO:0009735(response to cytokinin stimulus)
miR7760-p3_2	TRINITY_DN19742_c0_g1	TRINITY_DN19742_c0_g1	-	3	501-518	1
miR7760-p3_2	TRINITY_DN19742_c0_g2	TRINITY_DN19742_c0_g2	-	3	507-524	1
miR7760-p3_2	TRINITY_DN48124_c0_g1	TRINITY_DN48124_c0_g1	-	3	71-88	1
miR7760-p3_2	TRINITY_DN30338_c2_g1	TRINITY_DN30338_c2_g1	-	3	1037-1054	1
miR7760-p3_2	TRINITY_DN6298_c0_g2	TRINITY_DN6298_c0_g2	sp|Q9SX31|PERK9_ARATH Proline-rich receptor-like protein kinase PERK9 OS=Arabidopsis thaliana GN=PERK9 PE=2 SV=1	3	368-385	1	GO:0016021(integral to membrane);GO:0005886(plasma membrane);GO:0005524(ATP binding);GO:0004674(protein serine/threonine kinase activity)
miR7760-p3_2	TRINITY_DN48124_c0_g1	TRINITY_DN48124_c0_g1	-	3	44-61	1
miR7760-p3_2	TRINITY_DN25179_c0_g2	TRINITY_DN25179_c0_g2	-	3.5	165-182	1
miR7760-p3_2	TRINITY_DN32507_c2_g6	TRINITY_DN32507_c2_g6	-	3.5	72-90	1
miR7760-p3_2	TRINITY_DN32236_c2_g2	TRINITY_DN32236_c2_g2	-	3.5	114-131	1
miR7760-p3_2	TRINITY_DN32236_c2_g11	TRINITY_DN32236_c2_g11	sp|Q66KL9|RBM42_XENTR RNA-binding protein 42 OS=Xenopus tropicalis GN=rbm42 PE=2 SV=1	3.5	114-131	1	GO:0005737(cytoplasm);GO:0005634(nucleus);GO:0000166(nucleotide binding);GO:0003723(RNA binding)
miR7760-p3_2	TRINITY_DN42976_c0_g1	TRINITY_DN42976_c0_g1	-	3.5	192-209	1
miR7760-p3_2	TRINITY_DN32236_c2_g27	TRINITY_DN32236_c2_g27	sp|O65530|PEK14_ARATH Proline-rich receptor-like protein kinase PERK14 OS=Arabidopsis thaliana GN=PERK14 PE=2 SV=1	3.5	186-203	1	GO:0016021(integral to membrane);GO:0005886(plasma membrane);GO:0005524(ATP binding);GO:0004674(protein serine/threonine kinase activity)
miR7760-p3_2	TRINITY_DN32236_c2_g26	TRINITY_DN32236_c2_g26	-	3.5	186-203	1
miR7760-p3_2	TRINITY_DN33474_c0_g1	TRINITY_DN33474_c0_g1	-	3.5	217-234	1
miR7760-p3_2	TRINITY_DN32236_c2_g24	TRINITY_DN32236_c2_g24	sp|Q9C660|PEK10_ARATH Proline-rich receptor-like protein kinase PERK10 OS=Arabidopsis thaliana GN=PERK10 PE=1 SV=2	3.5	326-343	1	GO:0016021(integral to membrane);GO:0005886(plasma membrane);GO:0005524(ATP binding);GO:0004674(protein serine/threonine kinase activity)
miR7760-p3_2	TRINITY_DN32236_c2_g6	TRINITY_DN32236_c2_g6	-	3.5	325-342	1
miR7760-p3_2	TRINITY_DN20897_c0_g1	TRINITY_DN20897_c0_g1	-	3.5	116-133	1
miR7760-p3_2	TRINITY_DN33620_c0_g1	TRINITY_DN33620_c0_g1	-	3.5	23-40	1
miR7760-p3_2	TRINITY_DN32236_c2_g7	TRINITY_DN32236_c2_g7	sp|Q03878|GRP1_DAUCA Glycine-rich RNA-binding protein OS=Daucus carota PE=2 SV=1	3.5	398-415	1	GO:0000166(nucleotide binding);GO:0003723(RNA binding)
miR7760-p3_2	TRINITY_DN11523_c0_g1	TRINITY_DN11523_c0_g1	-	3.5	114-131	1
miR7760-p3_2	TRINITY_DN36702_c0_g1	TRINITY_DN36702_c0_g1	sp|Q9SEZ1|HB29_ARATH Transcription factor HB29 OS=Arabidopsis thaliana GN=HB29 PE=1 SV=1	3.5	193-210	1
miR7760-p3_2	TRINITY_DN40961_c0_g1	TRINITY_DN40961_c0_g1	-	3.5	158-175	1
miR7760-p3_2	TRINITY_DN25179_c0_g3	TRINITY_DN25179_c0_g3	sp|O75762|TRPA1_HUMAN Transient receptor potential cation channel subfamily A member 1 OS=Homo sapiens GN=TRPA1 PE=2 SV=3	3.5	925-942	1	GO:0005887(integral to plasma membrane)
miR7760-p3_2	TRINITY_DN30883_c0_g1	TRINITY_DN30883_c0_g1	-	3.5	517-534	1
miR7760-p3_2	TRINITY_DN20650_c0_g15	TRINITY_DN20650_c0_g15	sp|Q9LV48|PERK1_ARATH Proline-rich receptor-like protein kinase PERK1 OS=Arabidopsis thaliana GN=PERK1 PE=1 SV=1	3.5	484-501	1	GO:0016021(integral to membrane);GO:0005886(plasma membrane);GO:0005524(ATP binding);GO:0004674(protein serine/threonine kinase activity);GO:0046777(protein autophosphorylation)
miR7760-p3_2	TRINITY_DN6920_c0_g1	TRINITY_DN6920_c0_g1	sp|O64847|U136_ARATH UPF0136 membrane protein At2g26240 OS=Arabidopsis thaliana GN=At2g26240 PE=3 SV=1	3.5	725-742	1	GO:0016021(integral to membrane);GO:0005739(mitochondrion)
miR7760-p3_2	TRINITY_DN25503_c0_g1	TRINITY_DN25503_c0_g1	sp|Q9FDW1|MYB44_ARATH Transcription factor MYB44 OS=Arabidopsis thaliana GN=MYB44 PE=2 SV=1	3.5	790-807	1	GO:0005634(nucleus);GO:0003677(DNA binding);GO:0009738(abscisic acid mediated signaling pathway);GO:0006355(regulation of transcription, DNA-dependent);GO:0009733(response to auxin stimulus);GO:0046686(response to cadmium ion);GO:0010200(response to chitin);GO:0009723(response to ethylene stimulus);GO:0009739(response to gibberellin stimulus);GO:0009753(response to jasmonic acid stimulus);GO:0009…
miR7760-p3_2	TRINITY_DN22463_c1_g1	TRINITY_DN22463_c1_g1	sp|Q56Z59|PATL3_ARATH Patellin-3 OS=Arabidopsis thaliana GN=PATL3 PE=1 SV=2	3.5	1853-1870	1	GO:0005737(cytoplasm);GO:0016021(integral to membrane);GO:0005886(plasma membrane);GO:0008289(lipid binding);GO:0007049(cell cycle);GO:0051301(cell division);GO:0006810(transport)
miR7760-p3_2	TRINITY_DN26208_c1_g1	TRINITY_DN26208_c1_g1	sp|Q9ZQP1|DSP8_ARATH Putative dual specificity protein phosphatase DSP8 OS=Arabidopsis thaliana GN=DSP8 PE=2 SV=2	3.5	1339-1356	1
miR7760-p3_2	TRINITY_DN24900_c0_g1	TRINITY_DN24900_c0_g1	sp|Q94BZ5|HSFA5_ARATH Heat stress transcription factor A-5 OS=Arabidopsis thaliana GN=HSFA5 PE=2 SV=1	3.5	1754-1771	1	GO:0005737(cytoplasm);GO:0005634(nucleus);GO:0043565(sequence-specific DNA binding);GO:0003700(sequence-specific DNA binding transcription factor activity);GO:0006950(response to stress)
miR7760-p3_2	TRINITY_DN31691_c0_g1	TRINITY_DN31691_c0_g1	sp|Q9ZU40|QSOX2_ARATH Sulfhydryl oxidase 2 OS=Arabidopsis thaliana GN=QSOX2 PE=2 SV=2	3.5	1925-1942	1	GO:0005576(extracellular region);GO:0005794(Golgi apparatus);GO:0016972(thiol oxidase activity);GO:0045454(cell redox homeostasis)
miR7760-p3_2	TRINITY_DN28733_c0_g5	TRINITY_DN28733_c0_g5	-	3.5	1724-1741	1
miR7760-p3_2	TRINITY_DN5477_c0_g1	TRINITY_DN5477_c0_g1	sp|O75351|VPS4B_HUMAN Vacuolar protein sorting-associated protein 4B OS=Homo sapiens GN=VPS4B PE=1 SV=2	3.5	1689-1706	1	GO:0005829(cytosol);GO:0005769(early endosome);GO:0031902(late endosome membrane);GO:0005764(lysosome);GO:0005634(nucleus);GO:0005774(vacuolar membrane);GO:0005524(ATP binding);GO:0042623(ATPase activity, coupled);GO:0008022(protein C-terminus binding);GO:0007049(cell cycle);GO:0051301(cell division);GO:0016044(cellular membrane organization);GO:0032510(endosome to lysosome transport via multives…	ko04144(Endocytosis)
miR7760-p3_2	TRINITY_DN24426_c0_g1	TRINITY_DN24426_c0_g1	-	3.5	676-693	1
miR7760-p3_2	TRINITY_DN30352_c5_g3	TRINITY_DN30352_c5_g3	sp|P42158|KC1D_ARATH Casein kinase I isoform delta-like OS=Arabidopsis thaliana GN=At4g26100 PE=2 SV=2	3.5	2322-2339	1	GO:0005737(cytoplasm);GO:0009506(plasmodesma);GO:0005524(ATP binding);GO:0004674(protein serine/threonine kinase activity)	ko04340(Hedgehog signaling pathway)
miR7760-p3_2	TRINITY_DN19931_c0_g1	TRINITY_DN19931_c0_g1	sp|O65023|EAAC_ARATH Probable envelope ADP,ATP carrier protein, chloroplastic OS=Arabidopsis thaliana GN=EAAC PE=2 SV=2	3.5	1478-1495	1	GO:0031969(chloroplast membrane);GO:0016021(integral to membrane);GO:0005743(mitochondrial inner membrane);GO:0005488(binding);GO:0009624(response to nematode);GO:0055085(transmembrane transport)
miR7760-p3_2	TRINITY_DN4282_c0_g1	TRINITY_DN4282_c0_g1	sp|Q9ZT49|ATL45_ARATH RING-H2 finger protein ATL45 OS=Arabidopsis thaliana GN=ATL45 PE=2 SV=1	3.5	396-412	1	GO:0016021(integral to membrane);GO:0008270(zinc ion binding);GO:0006952(defense response);GO:0010200(response to chitin)
miR7760-p3_2	TRINITY_DN23533_c1_g1	TRINITY_DN23533_c1_g1	sp|B5YHE5|LEUD_THEYD 3-isopropylmalate dehydratase small subunit OS=Thermodesulfovibrio yellowstonii (strain ATCC 51303 / DSM 11347 / YP87) GN=leuD PE=3 SV=1	3.5	607-624	1	GO:0009316(3-isopropylmalate dehydratase complex);GO:0003861(3-isopropylmalate dehydratase activity);GO:0009098(leucine biosynthetic process)	ko00290(Valine,ko leucine and isoleucine biosynthesis);ko00660(C5-Branched dibasic acid metabolism)
miR7760-p3_2	TRINITY_DN32360_c1_g1	TRINITY_DN32360_c1_g1	sp|Q8VYZ0|ORTH2_ARATH E3 ubiquitin-protein ligase ORTHRUS 2 OS=Arabidopsis thaliana GN=ORTH2 PE=1 SV=1	3.5	3188-3205	1	GO:0010369(chromocenter);GO:0005634(nucleus);GO:0003682(chromatin binding);GO:0010385(double-stranded methylated DNA binding);GO:0042393(histone binding);GO:0008327(methyl-CpG binding);GO:0010428(methyl-CpNpG binding);GO:0010429(methyl-CpNpN binding);GO:0004842(ubiquitin-protein ligase activity);GO:0008270(zinc ion binding);GO:0051301(cell division);GO:0031508(centromeric heterochromatin formatio…
miR7760-p3_2	TRINITY_DN19415_c0_g1	TRINITY_DN19415_c0_g1	sp|Q84M24|AB1A_ARATH ABC transporter A family member 1 OS=Arabidopsis thaliana GN=ABCA1 PE=2 SV=2	3.5	3079-3096	1	GO:0016021(integral to membrane);GO:0005774(vacuolar membrane);GO:0005524(ATP binding);GO:0016887(ATPase activity);GO:0006810(transport)	ko02010(ABC transporters)
miR7760-p3_2	TRINITY_DN26450_c0_g1	TRINITY_DN26450_c0_g1	sp|Q7Y1B6|GAI_SOLLC DELLA protein GAI OS=Solanum lycopersicum GN=GAI PE=2 SV=1	3.5	1940-1958	1	GO:0005634(nucleus);GO:0009740(gibberellic acid mediated signaling pathway);GO:0006355(regulation of transcription, DNA-dependent);GO:0006351(transcription, DNA-dependent)
miR7760-p3_2	TRINITY_DN19453_c0_g1	TRINITY_DN19453_c0_g1	sp|P25873|RK15_ARATH 50S ribosomal protein L15, chloroplastic OS=Arabidopsis thaliana GN=RPL15 PE=2 SV=2	3.5	883-899	1	GO:0009570(chloroplast stroma);GO:0000311(plastid large ribosomal subunit);GO:0003735(structural constituent of ribosome);GO:0006412(translation)	ko03010(Ribosome)
miR7760-p3_2	TRINITY_DN25628_c0_g1	TRINITY_DN25628_c0_g1	sp|P42731|PABP2_ARATH Polyadenylate-binding protein 2 OS=Arabidopsis thaliana GN=PAB2 PE=2 SV=1	3.5	1973-1990	1	GO:0005829(cytosol);GO:0000166(nucleotide binding);GO:0003723(RNA binding);GO:0009651(response to salt stress)
miR7760-p3_2	TRINITY_DN18225_c0_g1	TRINITY_DN18225_c0_g1	-	3.5	1008-1025	1
miR7760-p3_2	TRINITY_DN33474_c0_g1	TRINITY_DN33474_c0_g1	-	3.5	271-288	1
miR7760-p3_2	TRINITY_DN28383_c0_g1	TRINITY_DN28383_c0_g1	sp|Q9ZVM9|Y1461_ARATH Probable serine/threonine-protein kinase At1g54610 OS=Arabidopsis thaliana GN=At1g54610 PE=1 SV=1	3.5	1655-1672	1	GO:0005886(plasma membrane);GO:0005524(ATP binding);GO:0005515(protein binding);GO:0004674(protein serine/threonine kinase activity)
miR7760-p3_2	TRINITY_DN37108_c0_g1	TRINITY_DN37108_c0_g1	-	4	216-233	1
miR7760-p3_2	TRINITY_DN34434_c0_g1	TRINITY_DN34434_c0_g1	-	4	28-45	1
miR7760-p3_2	TRINITY_DN34376_c0_g1	TRINITY_DN34376_c0_g1	-	4	182-199	1
miR7760-p3_2	TRINITY_DN21846_c0_g1	TRINITY_DN21846_c0_g1	-	4	72-89	1
miR7760-p3_2	TRINITY_DN21846_c0_g2	TRINITY_DN21846_c0_g2	-	4	118-135	1
miR7760-p3_2	TRINITY_DN18132_c0_g12	TRINITY_DN18132_c0_g12	sp|Q9ZNU9|SAP3_ARATH Zinc finger A20 and AN1 domain-containing stress-associated protein 3 OS=Arabidopsis thaliana GN=SAP3 PE=2 SV=1	4	433-450	1	GO:0003677(DNA binding);GO:0008270(zinc ion binding)
miR7760-p3_2	TRINITY_DN9033_c0_g1	TRINITY_DN9033_c0_g1	-	4	197-214	1
miR7760-p3_2	TRINITY_DN14407_c0_g2	TRINITY_DN14407_c0_g2	sp|O65530|PEK14_ARATH Proline-rich receptor-like protein kinase PERK14 OS=Arabidopsis thaliana GN=PERK14 PE=2 SV=1	4	327-344	1	GO:0016021(integral to membrane);GO:0005886(plasma membrane);GO:0005524(ATP binding);GO:0004674(protein serine/threonine kinase activity)
miR7760-p3_2	TRINITY_DN14407_c0_g1	TRINITY_DN14407_c0_g1	sp|O65530|PEK14_ARATH Proline-rich receptor-like protein kinase PERK14 OS=Arabidopsis thaliana GN=PERK14 PE=2 SV=1	4	329-346	1	GO:0016021(integral to membrane);GO:0005886(plasma membrane);GO:0005524(ATP binding);GO:0004674(protein serine/threonine kinase activity)
miR7760-p3_2	TRINITY_DN34658_c0_g1	TRINITY_DN34658_c0_g1	-	4	10-27	1
miR7760-p3_2	TRINITY_DN37035_c0_g1	TRINITY_DN37035_c0_g1	sp|P10979|GRPA_MAIZE Glycine-rich RNA-binding, abscisic acid-inducible protein OS=Zea mays GN=RAB15 PE=1 SV=1	4	194-211	1	GO:0000166(nucleotide binding);GO:0003723(RNA binding);GO:0006950(response to stress)
miR7760-p3_2	TRINITY_DN15859_c2_g1	TRINITY_DN15859_c2_g1	-	4	93-110	1
miR7760-p3_2	TRINITY_DN34435_c0_g1	TRINITY_DN34435_c0_g1	-	4	49-66	1
miR7760-p3_2	TRINITY_DN493_c0_g1	TRINITY_DN493_c0_g1	-	4	236-253	1
miR7760-p3_2	TRINITY_DN37797_c0_g1	TRINITY_DN37797_c0_g1	-	4	74-91	1
miR7760-p3_2	TRINITY_DN43207_c0_g1	TRINITY_DN43207_c0_g1	-	4	10-27	1
miR7760-p3_2	TRINITY_DN19027_c0_g25	TRINITY_DN19027_c0_g25	-	4	34-51	1
miR7760-p3_2	TRINITY_DN19027_c0_g8	TRINITY_DN19027_c0_g8	-	4	34-51	1
miR7760-p3_2	TRINITY_DN19027_c0_g17	TRINITY_DN19027_c0_g17	-	4	34-51	1
miR7760-p3_2	TRINITY_DN49289_c0_g1	TRINITY_DN49289_c0_g1	-	4	177-194	1
miR7760-p3_2	TRINITY_DN19027_c0_g11	TRINITY_DN19027_c0_g11	-	4	34-51	1
miR7760-p3_2	TRINITY_DN28580_c0_g1	TRINITY_DN28580_c0_g1	-	4	92-109	1
miR7760-p3_2	TRINITY_DN28580_c0_g8	TRINITY_DN28580_c0_g8	-	4	92-109	1
miR7760-p3_2	TRINITY_DN28580_c0_g2	TRINITY_DN28580_c0_g2	-	4	92-109	1
miR7760-p3_2	TRINITY_DN19027_c0_g29	TRINITY_DN19027_c0_g29	-	4	34-51	1
miR7760-p3_2	TRINITY_DN28580_c0_g7	TRINITY_DN28580_c0_g7	-	4	92-109	1
miR7760-p3_2	TRINITY_DN19027_c0_g3	TRINITY_DN19027_c0_g3	-	4	34-51	1
miR7760-p3_2	TRINITY_DN19027_c0_g26	TRINITY_DN19027_c0_g26	-	4	34-51	1
miR7760-p3_2	TRINITY_DN19027_c0_g21	TRINITY_DN19027_c0_g21	-	4	34-51	1
miR7760-p3_2	TRINITY_DN19027_c0_g13	TRINITY_DN19027_c0_g13	sp|Q7G6K7|FH3_ORYSJ Formin-like protein 3 OS=Oryza sativa subsp. japonica GN=FH3 PE=2 SV=2	4	34-51	1	GO:0003779(actin binding);GO:0004721(phosphoprotein phosphatase activity);GO:0030036(actin cytoskeleton organization)
miR7760-p3_2	TRINITY_DN19027_c0_g15	TRINITY_DN19027_c0_g15	-	4	34-51	1
miR7760-p3_2	TRINITY_DN19027_c0_g18	TRINITY_DN19027_c0_g18	-	4	34-51	1
miR7760-p3_2	TRINITY_DN19027_c0_g12	TRINITY_DN19027_c0_g12	-	4	34-51	1
miR7760-p3_2	TRINITY_DN19027_c0_g6	TRINITY_DN19027_c0_g6	-	4	34-51	1
miR7760-p3_2	TRINITY_DN19027_c0_g23	TRINITY_DN19027_c0_g23	-	4	34-51	1
miR7760-p3_2	TRINITY_DN49850_c1_g1	TRINITY_DN49850_c1_g1	-	4	375-392	1
miR7760-p3_2	TRINITY_DN19027_c0_g9	TRINITY_DN19027_c0_g9	-	4	34-51	1
miR7760-p3_2	TRINITY_DN19027_c0_g10	TRINITY_DN19027_c0_g10	-	4	34-51	1
miR7760-p3_2	TRINITY_DN19027_c0_g2	TRINITY_DN19027_c0_g2	-	4	34-51	1
miR7760-p3_2	TRINITY_DN36344_c0_g1	TRINITY_DN36344_c0_g1	-	4	47-64	1
miR7760-p3_2	TRINITY_DN19027_c0_g1	TRINITY_DN19027_c0_g1	-	4	34-51	1
miR7760-p3_2	TRINITY_DN22558_c0_g1	TRINITY_DN22558_c0_g1	sp|Q84J78|SSBP_ARATH Single-stranded DNA-binding protein, mitochondrial OS=Arabidopsis thaliana GN=At4g11060 PE=2 SV=1	4	287-304	1	GO:0005739(mitochondrion);GO:0003697(single-stranded DNA binding);GO:0006260(DNA replication)	ko03030(DNA replication);ko03430(Mismatch repair);ko03440(Homologous recombination)
miR7760-p3_2	TRINITY_DN27477_c0_g1	TRINITY_DN27477_c0_g1	-	4	77-94	1
miR7760-p3_2	TRINITY_DN34750_c0_g1	TRINITY_DN34750_c0_g1	-	4	245-262	1
miR7760-p3_2	TRINITY_DN45898_c0_g1	TRINITY_DN45898_c0_g1	sp|Q9T041|MAPT_ARATH Microtubule-associated protein TORTIFOLIA1 OS=Arabidopsis thaliana GN=TOR1 PE=1 SV=2	4	432-449	1	GO:0010005(cortical microtubule, transverse to long axis);GO:0008017(microtubule binding);GO:0010031(circumnutation);GO:0007275(multicellular organismal development);GO:0009826(unidimensional cell growth)
miR7760-p3_2	TRINITY_DN3389_c0_g1	TRINITY_DN3389_c0_g1	-	4	136-153	1
miR7760-p3_2	TRINITY_DN29343_c0_g1	TRINITY_DN29343_c0_g1	-	4	414-431	1
miR7760-p3_2	TRINITY_DN37676_c0_g1	TRINITY_DN37676_c0_g1	sp|O81323|LBD30_ARATH LOB domain-containing protein 30 OS=Arabidopsis thaliana GN=LBD30 PE=2 SV=1	4	69-86	1	GO:0010199(organ boundary specification between lateral organs and the meristem);GO:0010089(xylem development)
miR7760-p3_2	TRINITY_DN41519_c0_g1	TRINITY_DN41519_c0_g1	-	4	439-456	1
miR7760-p3_2	TRINITY_DN20087_c0_g1	TRINITY_DN20087_c0_g1	-	4	172-189	1
miR7760-p3_2	TRINITY_DN19666_c0_g1	TRINITY_DN19666_c0_g1	sp|Q9FJ93|DRE1D_ARATH Dehydration-responsive element-binding protein 1D OS=Arabidopsis thaliana GN=DREB1D PE=2 SV=1	4	486-503	1	GO:0005634(nucleus);GO:0003677(DNA binding);GO:0003700(sequence-specific DNA binding transcription factor activity);GO:0009738(abscisic acid mediated signaling pathway);GO:0006950(response to stress)
miR7760-p3_2	TRINITY_DN18016_c0_g1	TRINITY_DN18016_c0_g1	sp|Q9LY00|WRK70_ARATH Probable WRKY transcription factor 70 OS=Arabidopsis thaliana GN=WRKY70 PE=2 SV=1	4	503-520	1	GO:0005634(nucleus);GO:0043565(sequence-specific DNA binding);GO:0003700(sequence-specific DNA binding transcription factor activity);GO:0050832(defense response to fungus);GO:0009864(induced systemic resistance, jasmonic acid mediated signaling pathway);GO:0045892(negative regulation of transcription, DNA-dependent);GO:0010200(response to chitin);GO:0009862(systemic acquired resistance, salicyli…
miR7760-p3_2	TRINITY_DN493_c0_g2	TRINITY_DN493_c0_g2	-	4	558-575	1
miR7760-p3_2	TRINITY_DN27185_c0_g1	TRINITY_DN27185_c0_g1	sp|O23403|PPD1_ARATH PsbP domain-containing protein 1, chloroplastic OS=Arabidopsis thaliana GN=PPD1 PE=1 SV=1	4	985-1002	1	GO:0009570(chloroplast stroma);GO:0009543(chloroplast thylakoid lumen);GO:0009535(chloroplast thylakoid membrane);GO:0019898(extrinsic to membrane);GO:0009654(oxygen evolving complex);GO:0005509(calcium ion binding);GO:0015979(photosynthesis)
miR7760-p3_2	TRINITY_DN43329_c0_g1	TRINITY_DN43329_c0_g1	sp|Q5XF59|HIBC4_ARATH 3-hydroxyisobutyryl-CoA hydrolase-like protein 1, mitochondrial OS=Arabidopsis thaliana GN=At3g60510 PE=2 SV=1	4	141-159	1	GO:0005739(mitochondrion);GO:0016787(hydrolase activity)
miR7760-p3_2	TRINITY_DN32778_c1_g1	TRINITY_DN32778_c1_g1	-	4	744-761	1
miR7760-p3_2	TRINITY_DN38633_c0_g1	TRINITY_DN38633_c0_g1	-	4	83-100	1
miR7760-p3_2	TRINITY_DN40568_c0_g1	TRINITY_DN40568_c0_g1	sp|Q9LM66|XCP2_ARATH Xylem cysteine proteinase 2 OS=Arabidopsis thaliana GN=XCP2 PE=2 SV=2	4	521-538	1	GO:0005618(cell wall);GO:0005886(plasma membrane);GO:0005773(vacuole);GO:0004197(cysteine-type endopeptidase activity);GO:0010623(developmental programmed cell death);GO:0006508(proteolysis)
miR7760-p3_2	TRINITY_DN17424_c2_g1	TRINITY_DN17424_c2_g1	sp|Q8S9H7|DIV_ANTMA Transcription factor DIVARICATA OS=Antirrhinum majus GN=DIVARICATA PE=2 SV=1	4	370-387	1
miR7760-p3_2	TRINITY_DN19027_c0_g5	TRINITY_DN19027_c0_g5	-	4	34-51	1
miR7760-p3_2	TRINITY_DN30338_c2_g1	TRINITY_DN30338_c2_g1	-	4	1800-1817	1
miR7760-p3_2	TRINITY_DN19027_c0_g14	TRINITY_DN19027_c0_g14	-	4	34-51	1
miR7760-p3_2	TRINITY_DN19027_c0_g24	TRINITY_DN19027_c0_g24	-	4	34-51	1
miR7760-p3_2	TRINITY_DN19027_c0_g7	TRINITY_DN19027_c0_g7	-	4	34-51	1
miR7760-p3_2	TRINITY_DN1218_c0_g8	TRINITY_DN1218_c0_g8	-	4	87-104	1
miR7760-p3_2	TRINITY_DN19027_c0_g16	TRINITY_DN19027_c0_g16	-	4	34-51	1
miR7760-p3_2	TRINITY_DN26461_c0_g3	TRINITY_DN26461_c0_g3	-	4	597-614	1
miR7760-p3_2	TRINITY_DN29071_c0_g1	TRINITY_DN29071_c0_g1	sp|P21226|CHI2_PEA Endochitinase A2 OS=Pisum sativum GN=CHI2 PE=1 SV=2	4	1059-1076	1	GO:0008061(chitin binding);GO:0004568(chitinase activity);GO:0016998(cell wall macromolecule catabolic process);GO:0006032(chitin catabolic process);GO:0006952(defense response)	ko00520(Amino sugar and nucleotide sugar metabolism)
miR7760-p3_2	TRINITY_DN49581_c0_g1	TRINITY_DN49581_c0_g1	-	4	135-152	1
miR7760-p3_2	TRINITY_DN28463_c2_g1	TRINITY_DN28463_c2_g1	sp|Q8VYE2|TIM50_ARATH Mitochondrial import inner membrane translocase subunit TIM50 OS=Arabidopsis thaliana GN=TIM50 PE=1 SV=1	4	1356-1373	1	GO:0016021(integral to membrane);GO:0005743(mitochondrial inner membrane);GO:0015031(protein transport);GO:0055085(transmembrane transport)
miR7760-p3_2	TRINITY_DN15381_c0_g1	TRINITY_DN15381_c0_g1	-	4	71-88	1
miR7760-p3_2	TRINITY_DN30083_c0_g1	TRINITY_DN30083_c0_g1	sp|Q9SFZ3|BH110_ARATH Transcription factor bHLH110 OS=Arabidopsis thaliana GN=BHLH110 PE=2 SV=2	4	317-334	1	GO:0005634(nucleus);GO:0003677(DNA binding);GO:0006355(regulation of transcription, DNA-dependent);GO:0006351(transcription, DNA-dependent)
miR7760-p3_2	TRINITY_DN15871_c0_g1	TRINITY_DN15871_c0_g1	sp|Q94G17|TATC_PEA Sec-independent protein translocase protein TATC, chloroplastic OS=Pisum sativum GN=TATC PE=1 SV=1	4	1043-1060	1		ko03060(Protein export);ko03070(Bacterial secretion system)
miR7760-p3_2	TRINITY_DN16046_c1_g1	TRINITY_DN16046_c1_g1	sp|Q8W034|RNP1_ARATH Heterogeneous nuclear ribonucleoprotein 1 OS=Arabidopsis thaliana GN=RNP1 PE=1 SV=1	4	1015-1032	1
miR7760-p3_2	TRINITY_DN1534_c0_g1	TRINITY_DN1534_c0_g1	-	4	340-357	1
miR7760-p3_2	TRINITY_DN8244_c0_g1	TRINITY_DN8244_c0_g1	-	4	212-229	1
miR7760-p3_2	TRINITY_DN30020_c0_g9	TRINITY_DN30020_c0_g9	-	4	1262-1279	1
miR7760-p3_2	TRINITY_DN1218_c0_g2	TRINITY_DN1218_c0_g2	-	4	87-104	1
miR7760-p3_2	TRINITY_DN1218_c0_g7	TRINITY_DN1218_c0_g7	-	4	87-104	1
miR7760-p3_2	TRINITY_DN1218_c0_g5	TRINITY_DN1218_c0_g5	-	4	87-104	1
miR7760-p3_2	TRINITY_DN1218_c0_g9	TRINITY_DN1218_c0_g9	-	4	87-104	1
miR7760-p3_2	TRINITY_DN1218_c0_g1	TRINITY_DN1218_c0_g1	-	4	87-104	1
miR7760-p3_2	TRINITY_DN1218_c0_g10	TRINITY_DN1218_c0_g10	-	4	87-104	1
miR7760-p3_2	TRINITY_DN1218_c0_g6	TRINITY_DN1218_c0_g6	-	4	87-104	1
miR7760-p3_2	TRINITY_DN20826_c0_g1	TRINITY_DN20826_c0_g1	sp|Q84W04|CNIH4_ARATH Protein cornichon homolog 4 OS=Arabidopsis thaliana GN=At1g12390 PE=1 SV=1	4	763-780	1	GO:0016021(integral to membrane);GO:0035556(intracellular signal transduction)
miR7760-p3_2	TRINITY_DN30589_c0_g1	TRINITY_DN30589_c0_g1	-	4	1390-1407	1
miR7760-p3_2	TRINITY_DN1218_c0_g4	TRINITY_DN1218_c0_g4	-	4	87-104	1
miR7760-p3_2	TRINITY_DN1407_c0_g2	TRINITY_DN1407_c0_g2	sp|Q84XV2|GTE1_ARATH Transcription factor GTE1 OS=Arabidopsis thaliana GN=GTE1 PE=2 SV=1	4	549-566	1	GO:0005634(nucleus);GO:0010030(positive regulation of seed germination);GO:0045893(positive regulation of transcription, DNA-dependent);GO:0006351(transcription, DNA-dependent)
miR7760-p3_2	TRINITY_DN1407_c0_g1	TRINITY_DN1407_c0_g1	sp|Q9FT54|GTE6_ARATH Transcription factor GTE6 OS=Arabidopsis thaliana GN=GTE6 PE=2 SV=1	4	549-566	1	GO:0005634(nucleus);GO:0004402(histone acetyltransferase activity);GO:0006338(chromatin remodeling);GO:0007275(multicellular organismal development);GO:0006355(regulation of transcription, DNA-dependent);GO:0006351(transcription, DNA-dependent)
miR7760-p3_2	TRINITY_DN24631_c1_g1	TRINITY_DN24631_c1_g1	sp|O65554|CIPK6_ARATH CBL-interacting serine/threonine-protein kinase 6 OS=Arabidopsis thaliana GN=CIPK6 PE=1 SV=1	4	1590-1607	1	GO:0005524(ATP binding);GO:0005515(protein binding);GO:0004674(protein serine/threonine kinase activity);GO:0010540(basipetal auxin transport);GO:0042538(hyperosmotic salinity response);GO:0007275(multicellular organismal development);GO:0009414(response to water deprivation);GO:0007165(signal transduction)
miR7760-p3_2	TRINITY_DN2042_c0_g1	TRINITY_DN2042_c0_g1	-	4	311-328	1
miR7760-p3_2	TRINITY_DN2042_c0_g2	TRINITY_DN2042_c0_g2	-	4	312-329	1
miR7760-p3_2	TRINITY_DN24549_c0_g1	TRINITY_DN24549_c0_g1	sp|Q7XTT4|NUCL2_ORYSJ Nucleolin 2 OS=Oryza sativa subsp. japonica GN=Os04g0620700 PE=2 SV=2	4	144-161	1
miR7760-p3_2	TRINITY_DN20062_c0_g1	TRINITY_DN20062_c0_g1	sp|Q9SJU8|RT31_ARATH 30S ribosomal protein S31, mitochondrial OS=Arabidopsis thaliana GN=At2g21290 PE=3 SV=1	4	481-498	1	GO:0005739(mitochondrion);GO:0005840(ribosome)
miR7760-p3_2	TRINITY_DN48991_c0_g1	TRINITY_DN48991_c0_g1	sp|Q9SB61|Y4466_ARATH ZF-HD homeobox protein At4g24660 OS=Arabidopsis thaliana GN=At4g24660 PE=1 SV=1	4	436-453	1	GO:0005634(nucleus);GO:0003677(DNA binding);GO:0046872(metal ion binding);GO:0005515(protein binding);GO:0009793(embryo development ending in seed dormancy);GO:0006355(regulation of transcription, DNA-dependent);GO:0006351(transcription, DNA-dependent)
miR7760-p3_2	TRINITY_DN10938_c1_g1	TRINITY_DN10938_c1_g1	sp|Q9FYF7|Y1736_ARATH REF/SRPP-like protein At1g67360 OS=Arabidopsis thaliana GN=At1g67360 PE=2 SV=1	4	795-812	1	GO:0005773(vacuole)
miR7760-p3_2	TRINITY_DN22868_c0_g15	TRINITY_DN22868_c0_g15	sp|Q9SH58|MAKR2_ARATH Probable membrane-associated kinase regulator 2 OS=Arabidopsis thaliana GN=MAKR2 PE=2 SV=1	4	750-767	1	GO:0005886(plasma membrane)
miR7760-p3_2	TRINITY_DN23543_c0_g1	TRINITY_DN23543_c0_g1	-	4	318-335	1
miR7760-p3_2	TRINITY_DN29826_c0_g1	TRINITY_DN29826_c0_g1	sp|P93471|COP1_PEA E3 ubiquitin-protein ligase COP1 OS=Pisum sativum GN=COP1 PE=2 SV=1	4	852-869	1	GO:0005737(cytoplasm);GO:0005634(nucleus);GO:0016874(ligase activity);GO:0008270(zinc ion binding);GO:0009585(red, far-red light phototransduction)	ko04115(p53 signaling pathway);ko04120(Ubiquitin mediated proteolysis)
miR7760-p3_2	TRINITY_DN10010_c0_g3	TRINITY_DN10010_c0_g3	-	4	248-265	1
miR7760-p3_2	TRINITY_DN27649_c0_g1	TRINITY_DN27649_c0_g1	sp|O80831|BAM7_ARATH Beta-amylase 7 OS=Arabidopsis thaliana GN=BAM7 PE=2 SV=2	4	656-673	1	GO:0005737(cytoplasm);GO:0016161(beta-amylase activity);GO:0043169(cation binding);GO:0000272(polysaccharide catabolic process)
miR7760-p3_2	TRINITY_DN28383_c0_g1	TRINITY_DN28383_c0_g1	sp|Q9ZVM9|Y1461_ARATH Probable serine/threonine-protein kinase At1g54610 OS=Arabidopsis thaliana GN=At1g54610 PE=1 SV=1	4	1673-1690	1	GO:0005886(plasma membrane);GO:0005524(ATP binding);GO:0005515(protein binding);GO:0004674(protein serine/threonine kinase activity)
miR7760-p3_2	TRINITY_DN27226_c1_g1	TRINITY_DN27226_c1_g1	-	4	1952-1969	1
miR7760-p3_2	TRINITY_DN19372_c1_g1	TRINITY_DN19372_c1_g1	-	4	575-592	1
miR7760-p3_2	TRINITY_DN46448_c0_g1	TRINITY_DN46448_c0_g1	-	4	92-108	1
miR7760-p3_2	TRINITY_DN101_c0_g1	TRINITY_DN101_c0_g1	sp|Q5EAE9|ATL43_ARATH RING-H2 finger protein ATL43 OS=Arabidopsis thaliana GN=ATL43 PE=2 SV=2	4	426-443	1	GO:0016021(integral to membrane);GO:0008270(zinc ion binding)
miR7760-p3_2	TRINITY_DN30745_c2_g4	TRINITY_DN30745_c2_g4	sp|Q6ZPY7|KDM3B_MOUSE Lysine-specific demethylase 3B OS=Mus musculus GN=Kdm3b PE=1 SV=2	4	2046-2063	1	GO:0005634(nucleus);GO:0046872(metal ion binding);GO:0016702(oxidoreductase activity, acting on single donors with incorporation of molecular oxygen, incorporation of two atoms of oxygen);GO:0016568(chromatin modification);GO:0006355(regulation of transcription, DNA-dependent);GO:0006351(transcription, DNA-dependent)
miR7760-p3_2	TRINITY_DN46624_c0_g1	TRINITY_DN46624_c0_g1	-	4	58-75	1
miR7760-p3_2	TRINITY_DN33463_c0_g1	TRINITY_DN33463_c0_g1	sp|Q9M0I2|EXPB3_ARATH Expansin-B3 OS=Arabidopsis thaliana GN=EXPB3 PE=2 SV=2	4	1041-1058	1	GO:0005618(cell wall);GO:0005576(extracellular region);GO:0016020(membrane);GO:0009506(plasmodesma);GO:0007047(cellular cell wall organization);GO:0019953(sexual reproduction);GO:0006949(syncytium formation)
miR7760-p3_2	TRINITY_DN28870_c1_g1	TRINITY_DN28870_c1_g1	-	4	1764-1781	1
miR7760-p3_2	TRINITY_DN21648_c1_g1	TRINITY_DN21648_c1_g1	sp|Q41916|CYT5_ARATH Cysteine proteinase inhibitor 5 OS=Arabidopsis thaliana GN=CYS5 PE=2 SV=2	4	348-366	1	GO:0005618(cell wall);GO:0005576(extracellular region);GO:0004869(cysteine-type endopeptidase inhibitor activity);GO:0006952(defense response)
miR7760-p3_2	TRINITY_DN29396_c1_g1	TRINITY_DN29396_c1_g1	sp|Q43644|NDUS1_SOLTU NADH dehydrogenase [ubiquinone] iron-sulfur protein 1, mitochondrial OS=Solanum tuberosum PE=1 SV=1	4	2353-2370	1	GO:0005743(mitochondrial inner membrane);GO:0070469(respiratory chain);GO:0051537(2 iron, 2 sulfur cluster binding);GO:0051539(4 iron, 4 sulfur cluster binding);GO:0009055(electron carrier activity);GO:0046872(metal ion binding);GO:0008137(NADH dehydrogenase );GO:0042773(ATP synthesis coupled electron transport);GO:0006810(transport)	ko00190(Oxidative phosphorylation)
miR7760-p3_2	TRINITY_DN23381_c0_g1	TRINITY_DN23381_c0_g1	-	4	1497-1514	1
miR7760-p3_2	TRINITY_DN30317_c5_g1	TRINITY_DN30317_c5_g1	sp|Q8H1E4|RAP24_ARATH Ethylene-responsive transcription factor RAP2-4 OS=Arabidopsis thaliana GN=RAP2-4 PE=1 SV=1	4	477-494	1	GO:0005634(nucleus);GO:0005515(protein binding);GO:0043565(sequence-specific DNA binding);GO:0003700(sequence-specific DNA binding transcription factor activity);GO:0071472(cellular response to salt stress);GO:0009736(cytokinin mediated signaling pathway);GO:0009873(ethylene mediated signaling pathway);GO:0010017(red or far-red light signaling pathway);GO:0045595(regulation of cell differentiatio…
miR7760-p3_2	TRINITY_DN22890_c0_g1	TRINITY_DN22890_c0_g1	sp|Q9LDH0|XYLT_ARATH Beta-(1,2)-xylosyltransferase OS=Arabidopsis thaliana GN=XYLT PE=1 SV=1	4	1056-1073	1	GO:0032580(Golgi cisterna membrane);GO:0005797(Golgi medial cisterna);GO:0016021(integral to membrane);GO:0050513(glycoprotein 2-beta-D-xylosyltransferase activity);GO:0031204(posttranslational protein targeting to membrane, translocation);GO:0006487(protein N-linked glycosylation)	ko00510(N-Glycan biosynthesis)
miR7760-p3_2	TRINITY_DN13926_c0_g1	TRINITY_DN13926_c0_g1	-	4	747-764	1
miR7760-p3_2	TRINITY_DN10010_c0_g1	TRINITY_DN10010_c0_g1	sp|O65530|PEK14_ARATH Proline-rich receptor-like protein kinase PERK14 OS=Arabidopsis thaliana GN=PERK14 PE=2 SV=1	4	248-265	1	GO:0016021(integral to membrane);GO:0005886(plasma membrane);GO:0005524(ATP binding);GO:0004674(protein serine/threonine kinase activity)	ko00270(Cysteine and methionine metabolism)
miR7760-p3_2	TRINITY_DN38439_c0_g1	TRINITY_DN38439_c0_g1	-	4	358-374	1
miR7760-p3_2	TRINITY_DN30025_c0_g1	TRINITY_DN30025_c0_g1	sp|Q15751|HERC1_HUMAN Probable E3 ubiquitin-protein ligase HERC1 OS=Homo sapiens GN=HERC1 PE=1 SV=2	4	1969-1986	1	GO:0005829(cytosol);GO:0005794(Golgi apparatus);GO:0016020(membrane);GO:0016881(acid-amino acid ligase activity);GO:0005086(ARF guanyl-nucleotide exchange factor activity);GO:0006464(protein modification process);GO:0006810(transport)
miR7760-p3_2	TRINITY_DN11165_c0_g1	TRINITY_DN11165_c0_g1	sp|Q99070|GRP2_SORBI Glycine-rich RNA-binding protein 2 OS=Sorghum bicolor GN=GRP2 PE=2 SV=1	4	40-57	1	GO:0000166(nucleotide binding);GO:0003723(RNA binding)
miR7760-p3_2	TRINITY_DN23615_c0_g4	TRINITY_DN23615_c0_g4	-	4	44-61	1
miR7760-p3_2	TRINITY_DN30245_c0_g1	TRINITY_DN30245_c0_g1	-	4	869-886	1
miR7760-p3_2	TRINITY_DN507_c1_g2	TRINITY_DN507_c1_g2	sp|Q9SX31|PERK9_ARATH Proline-rich receptor-like protein kinase PERK9 OS=Arabidopsis thaliana GN=PERK9 PE=2 SV=1	4	46-63	1	GO:0016021(integral to membrane);GO:0005886(plasma membrane);GO:0005524(ATP binding);GO:0004674(protein serine/threonine kinase activity)
miR7760-p3_2	TRINITY_DN8713_c0_g1	TRINITY_DN8713_c0_g1	-	4	283-300	1
miR7760-p3_2	TRINITY_DN29390_c1_g1	TRINITY_DN29390_c1_g1	sp|Q6EU30|Y2835_ORYSJ B3 domain-containing protein Os02g0683500 OS=Oryza sativa subsp. japonica GN=Os02g0683500 PE=2 SV=1	4	1162-1179	1	GO:0005634(nucleus);GO:0003677(DNA binding);GO:0006355(regulation of transcription, DNA-dependent);GO:0006351(transcription, DNA-dependent)
miR7760-p3_2	TRINITY_DN26455_c0_g1	TRINITY_DN26455_c0_g1	sp|Q9LMX5|AFP2_ARATH Ninja-family protein AFP2 OS=Arabidopsis thaliana GN=AFP2 PE=1 SV=1	4	766-783	1	GO:0005634(nucleus);GO:0005515(protein binding);GO:0009737(response to abscisic acid stimulus);GO:0006950(response to stress)
miR7760-p3_2	TRINITY_DN23615_c0_g5	TRINITY_DN23615_c0_g5	sp|Q9SX31|PERK9_ARATH Proline-rich receptor-like protein kinase PERK9 OS=Arabidopsis thaliana GN=PERK9 PE=2 SV=1	4	44-61	1	GO:0016021(integral to membrane);GO:0005886(plasma membrane);GO:0005524(ATP binding);GO:0004674(protein serine/threonine kinase activity)
miR7760-p3_2	TRINITY_DN10010_c0_g2	TRINITY_DN10010_c0_g2	-	4	248-265	1
miR7760-p3_2	TRINITY_DN29065_c0_g1	TRINITY_DN29065_c0_g1	sp|Q9FPS4|UBP23_ARATH Ubiquitin carboxyl-terminal hydrolase 23 OS=Arabidopsis thaliana GN=UBP23 PE=2 SV=2	4	3152-3169	1	GO:0008234(cysteine-type peptidase activity);GO:0004221(ubiquitin thiolesterase activity);GO:0006511(ubiquitin-dependent protein catabolic process)
miR7760-p3_2	TRINITY_DN25856_c0_g2	TRINITY_DN25856_c0_g2	sp|O49204|KAPS_CATRO Adenylyl-sulfate kinase, chloroplastic OS=Catharanthus roseus GN=AKN PE=2 SV=1	4	1045-1062	1	GO:0009507(chloroplast);GO:0004020(adenylylsulfate kinase activity);GO:0005524(ATP binding);GO:0019344(cysteine biosynthetic process);GO:0000103(sulfate assimilation)	ko00230(Purine metabolism);ko00450(Selenoamino acid metabolism);ko00920(Sulfur metabolism)
miR7760-p3_2	TRINITY_DN27448_c0_g1	TRINITY_DN27448_c0_g1	sp|Q9C660|PEK10_ARATH Proline-rich receptor-like protein kinase PERK10 OS=Arabidopsis thaliana GN=PERK10 PE=1 SV=2	4	1490-1507	1	GO:0016021(integral to membrane);GO:0005886(plasma membrane);GO:0005524(ATP binding);GO:0004674(protein serine/threonine kinase activity)
miR7760-p3_2	TRINITY_DN24798_c0_g1	TRINITY_DN24798_c0_g1	sp|Q9LH89|Y3885_ARATH Uncharacterized protein At3g28850 OS=Arabidopsis thaliana GN=At3g28850 PE=1 SV=1	4	335-352	1	GO:0005886(plasma membrane);GO:0009055(electron carrier activity);GO:0015035(protein disulfide oxidoreductase activity);GO:0045454(cell redox homeostasis)
miR7760-p3_2	TRINITY_DN31753_c2_g1	TRINITY_DN31753_c2_g1	sp|Q9LQS1|AAE8_ARATH Probable acyl-activating enzyme 8 OS=Arabidopsis thaliana GN=AAE8 PE=2 SV=1	4	450-467	1		ko00130(Ubiquinone and other terpenoid-quinone biosynthesis);ko00360(Phenylalanine metabolism);ko00940(Phenylpropanoid biosynthesis)
miR7760-p3_2	TRINITY_DN16436_c1_g1	TRINITY_DN16436_c1_g1	-	4	839-856	1
miR7760-p3_2	TRINITY_DN20386_c0_g1	TRINITY_DN20386_c0_g1	sp|Q9ZVN4|Y1500_ARATH Probable tyrosine-protein phosphatase At1g05000 OS=Arabidopsis thaliana GN=At1g05000 PE=1 SV=1	4	1616-1633	1	GO:0004725(protein tyrosine phosphatase activity)
miR7760-p3_2	TRINITY_DN7137_c0_g1	TRINITY_DN7137_c0_g1	sp|O50061|RK4_ARATH 50S ribosomal protein L4, chloroplastic OS=Arabidopsis thaliana GN=RPL4 PE=1 SV=2	4	602-619	1	GO:0009570(chloroplast stroma);GO:0009535(chloroplast thylakoid membrane);GO:0022626(cytosolic ribosome);GO:0005634(nucleus);GO:0000311(plastid large ribosomal subunit);GO:0008266(poly);GO:0019843(rRNA binding);GO:0003735(structural constituent of ribosome);GO:0006412(translation)	ko03010(Ribosome)
miR7760-p3_2	TRINITY_DN49425_c0_g1	TRINITY_DN49425_c0_g1	sp|Q3E936|MAKR1_ARATH Probable membrane-associated kinase regulator 1 OS=Arabidopsis thaliana GN=MAKR1 PE=1 SV=1	4	125-142	1	GO:0005886(plasma membrane);GO:0019210(kinase inhibitor activity);GO:0009742(brassinosteroid mediated signaling pathway)
miR7760-p3_2	TRINITY_DN25856_c0_g3	TRINITY_DN25856_c0_g3	sp|O49204|KAPS_CATRO Adenylyl-sulfate kinase, chloroplastic OS=Catharanthus roseus GN=AKN PE=2 SV=1	4	1249-1266	1	GO:0009507(chloroplast);GO:0004020(adenylylsulfate kinase activity);GO:0005524(ATP binding);GO:0019344(cysteine biosynthetic process);GO:0000103(sulfate assimilation)	ko00230(Purine metabolism);ko00450(Selenoamino acid metabolism);ko00920(Sulfur metabolism)
miR7760-p3_2	TRINITY_DN28025_c1_g2	TRINITY_DN28025_c1_g2	sp|Q9SY02|PP301_ARATH Pentatricopeptide repeat-containing protein At4g02750 OS=Arabidopsis thaliana GN=PCMP-H24 PE=3 SV=1	4	846-863	1	GO:0005488(binding)
miR7760-p3_2	TRINITY_DN25667_c1_g1	TRINITY_DN25667_c1_g1	sp|Q27GI3|NAT6_ARATH Nucleobase-ascorbate transporter 6 OS=Arabidopsis thaliana GN=NAT6 PE=2 SV=2	4	1892-1909	1	GO:0005618(cell wall);GO:0016021(integral to membrane);GO:0009506(plasmodesma);GO:0005773(vacuole);GO:0005215(transporter activity);GO:0055085(transmembrane transport)
miR7760-p3_2	TRINITY_DN24662_c0_g1	TRINITY_DN24662_c0_g1	-	4	507-524	1
miR7760-p3_2	TRINITY_DN24251_c1_g2	TRINITY_DN24251_c1_g2	sp|Q9LK03|PERK2_ARATH Proline-rich receptor-like protein kinase PERK2 OS=Arabidopsis thaliana GN=PERK2 PE=2 SV=3	4	444-461	1	GO:0016021(integral to membrane);GO:0005886(plasma membrane);GO:0005524(ATP binding);GO:0004674(protein serine/threonine kinase activity);GO:0004872(receptor activity)
miR7760-p3_2	TRINITY_DN13621_c0_g1	TRINITY_DN13621_c0_g1	sp|O24407|IAA16_ARATH Auxin-responsive protein IAA16 OS=Arabidopsis thaliana GN=IAA16 PE=1 SV=1	4	781-798	1	GO:0005634(nucleus);GO:0046983(protein dimerization activity);GO:0009734(auxin mediated signaling pathway);GO:0006355(regulation of transcription, DNA-dependent);GO:0006351(transcription, DNA-dependent)
miR7760-p3_2	TRINITY_DN24467_c1_g1	TRINITY_DN24467_c1_g1	sp|Q9ZUE0|PEK12_ARATH Proline-rich receptor-like protein kinase PERK12 OS=Arabidopsis thaliana GN=PERK12 PE=2 SV=2	4	2690-2707	1	GO:0016021(integral to membrane);GO:0005886(plasma membrane);GO:0005524(ATP binding);GO:0004674(protein serine/threonine kinase activity);GO:0032502(developmental process)
miR7760-p3_2	TRINITY_DN27992_c0_g1	TRINITY_DN27992_c0_g1	sp|Q9LV48|PERK1_ARATH Proline-rich receptor-like protein kinase PERK1 OS=Arabidopsis thaliana GN=PERK1 PE=1 SV=1	4	2136-2153	1	GO:0016021(integral to membrane);GO:0005886(plasma membrane);GO:0005524(ATP binding);GO:0004674(protein serine/threonine kinase activity);GO:0046777(protein autophosphorylation)	ko00270(Cysteine and methionine metabolism)
miR7760-p3_2	TRINITY_DN26748_c0_g1	TRINITY_DN26748_c0_g1	sp|Q9SZC9|HMA6_ARATH Copper-transporting ATPase PAA1, chloroplastic OS=Arabidopsis thaliana GN=PAA1 PE=2 SV=1	4	2717-2734	1	GO:0009941(chloroplast envelope);GO:0009570(chloroplast stroma);GO:0016021(integral to membrane);GO:0005524(ATP binding);GO:0004008(copper-exporting ATPase activity);GO:0046872(metal ion binding);GO:0006754(ATP biosynthetic process);GO:0009767(photosynthetic electron transport chain)
miR7760-p3_2	TRINITY_DN29678_c1_g1	TRINITY_DN29678_c1_g1	-	4	1734-1751	1
miR7760-p3_2	TRINITY_DN19020_c0_g1	TRINITY_DN19020_c0_g1	-	4	1294-1311	1
miR7760-p3_2	TRINITY_DN27927_c1_g1	TRINITY_DN27927_c1_g1	sp|Q4V8K2|CTBL1_RAT Beta-catenin-like protein 1 OS=Rattus norvegicus GN=Ctnnbl1 PE=2 SV=1	4	1745-1763	1	GO:0005634(nucleus);GO:0006915(apoptosis)
miR7760-p3_2	TRINITY_DN32797_c1_g4	TRINITY_DN32797_c1_g4	-	4	2747-2764	1
miR7760-p3_2	TRINITY_DN31514_c1_g1	TRINITY_DN31514_c1_g1	sp|O23372|ATXR3_ARATH Probable histone-lysine N-methyltransferase ATXR3 OS=Arabidopsis thaliana GN=ATXR3 PE=2 SV=2	4	7227-7244	1	GO:0005634(nucleus);GO:0042800(histone methyltransferase activity );GO:0048440(carpel development);GO:0048443(stamen development);GO:0010228(vegetative to reproductive phase transition of meristem)
miR7760-p3_2	TRINITY_DN32686_c2_g4	TRINITY_DN32686_c2_g4	sp|Q8CGC7|SYEP_MOUSE Bifunctional glutamate/proline--tRNA ligase OS=Mus musculus GN=Eprs PE=1 SV=4	4	5651-5668	1	GO:0005737(cytoplasm);GO:0005524(ATP binding);GO:0004818(glutamate-tRNA ligase activity);GO:0004827(proline-tRNA ligase activity);GO:0003723(RNA binding);GO:0006424(glutamyl-tRNA aminoacylation);GO:0006433(prolyl-tRNA aminoacylation)	ko00970(Aminoacyl-tRNA biosynthesis)
miR7760-p3_2	TRINITY_DN22452_c0_g1	TRINITY_DN22452_c0_g1	sp|Q9M3H5|HMA1_ARATH Probable cadmium/zinc-transporting ATPase HMA1, chloroplastic OS=Arabidopsis thaliana GN=HMA1 PE=1 SV=2	4	3083-3100	1	GO:0009706(chloroplast inner membrane);GO:0016021(integral to membrane);GO:0005524(ATP binding);GO:0008551(cadmium-exporting ATPase activity);GO:0015434(cadmium-transporting ATPase activity);GO:0005388(calcium-transporting ATPase activity);GO:0046872(metal ion binding);GO:0015633(zinc transporting ATPase activity);GO:0016463(zinc-exporting ATPase activity);GO:0006754(ATP biosynthetic process);GO:…
miR7760-p3_2	TRINITY_DN18810_c1_g1	TRINITY_DN18810_c1_g1	sp|Q8LFV3|CDF3_ARATH Cyclic dof factor 3 OS=Arabidopsis thaliana GN=CDF3 PE=1 SV=2	4	1857-1874	1	GO:0005634(nucleus);GO:0003677(DNA binding);GO:0005515(protein binding);GO:0008270(zinc ion binding);GO:0006355(regulation of transcription, DNA-dependent);GO:0006351(transcription, DNA-dependent)
miR7760-p3_2	TRINITY_DN23109_c0_g1	TRINITY_DN23109_c0_g1	sp|Q9C9Z7|Y3857_ARATH BTB/POZ domain-containing protein At3g08570 OS=Arabidopsis thaliana GN=At3g08570 PE=2 SV=2	4	2132-2149	1	GO:0004871(signal transducer activity);GO:0009416(response to light stimulus)
miR7760-p3_2	TRINITY_DN19520_c0_g1	TRINITY_DN19520_c0_g1	sp|Q3V1N1|MFHA1_MOUSE Malignant fibrous histiocytoma-amplified sequence 1 homolog OS=Mus musculus GN=Mfhas1 PE=2 SV=2	4	2250-2267	1
miR7760-p3_2	TRINITY_DN26068_c1_g1	TRINITY_DN26068_c1_g1	sp|Q9M5A9|GPT1_ARATH Glucose-6-phosphate/phosphate translocator 1, chloroplastic OS=Arabidopsis thaliana GN=GPT1 PE=2 SV=1	4	1266-1283	1	GO:0031969(chloroplast membrane);GO:0016021(integral to membrane);GO:0015152(glucose-6-phosphate transmembrane transporter activity);GO:0005315(inorganic phosphate transmembrane transporter activity);GO:0015120(phosphoglycerate transmembrane transporter activity);GO:0071917(triose-phosphate transmembrane transporter activity);GO:0009790(embryo development);GO:0009553(embryo sac development);GO:00…
miR7760-p3_2	TRINITY_DN32349_c0_g1	TRINITY_DN32349_c0_g1	-	4	518-535	1
miR7760-p3_2	TRINITY_DN19880_c0_g1	TRINITY_DN19880_c0_g1	sp|P60838|DRL1_ARATH Probable disease resistance protein At1g12280 OS=Arabidopsis thaliana GN=At1g12280 PE=3 SV=1	4	2296-2313	1	GO:0005524(ATP binding);GO:0006915(apoptosis);GO:0006952(defense response)
miR7760-p3_2	TRINITY_DN32592_c5_g2	TRINITY_DN32592_c5_g2	sp|P23881|TCEA3_MOUSE Transcription elongation factor A protein 3 OS=Mus musculus GN=Tcea3 PE=1 SV=3	4	1791-1808	1	GO:0005634(nucleus);GO:0003677(DNA binding);GO:0003746(translation elongation factor activity);GO:0008270(zinc ion binding);GO:0032784(regulation of transcription elongation, DNA-dependent);GO:0006357(regulation of transcription from RNA polymerase II promoter);GO:0006354(transcription elongation, DNA-dependent)
miR7760-p3_2	TRINITY_DN24747_c0_g1	TRINITY_DN24747_c0_g1	sp|O23066|C86A2_ARATH Cytochrome P450 86A2 OS=Arabidopsis thaliana GN=CYP86A2 PE=2 SV=1	4	455-472	1	GO:0016021(integral to membrane);GO:0018685(alkane 1-monooxygenase activity);GO:0009055(electron carrier activity);GO:0020037(heme binding);GO:0005515(protein binding);GO:0006631(fatty acid metabolic process)	ko00361(gamma-Hexachlorocyclohexane degradation);ko00626(Naphthalene and anthracene degradation);ko00903(Limonene and pinene degradation);ko00945(Stilbenoid,ko diarylheptanoid and gingerol biosynthesis)
miR7760-p3_2	TRINITY_DN11403_c0_g1	TRINITY_DN11403_c0_g1	sp|Q41188|CSP2_ARATH Cold shock protein 2 OS=Arabidopsis thaliana GN=CSP2 PE=1 SV=1	4	527-544	1
miR7760-p3_2	TRINITY_DN6920_c0_g1	TRINITY_DN6920_c0_g1	sp|O64847|U136_ARATH UPF0136 membrane protein At2g26240 OS=Arabidopsis thaliana GN=At2g26240 PE=3 SV=1	4	767-784	1	GO:0016021(integral to membrane);GO:0005739(mitochondrion)
miR7760-p3_2	TRINITY_DN23293_c0_g1	TRINITY_DN23293_c0_g1	-	4	173-190	1
miR7760-p3_2	TRINITY_DN10108_c0_g1	TRINITY_DN10108_c0_g1	sp|Q9M0R0|BH081_ARATH Transcription factor bHLH81 OS=Arabidopsis thaliana GN=BHLH81 PE=2 SV=1	4	1119-1136	1	GO:0005634(nucleus);GO:0003677(DNA binding);GO:0006355(regulation of transcription, DNA-dependent);GO:0006351(transcription, DNA-dependent)
miR7760-p3_2	TRINITY_DN17057_c0_g2	TRINITY_DN17057_c0_g2	-	4	211-228	1
miR7760-p3_2	TRINITY_DN31940_c92_g1	TRINITY_DN31940_c92_g1	sp|Q9LK03|PERK2_ARATH Proline-rich receptor-like protein kinase PERK2 OS=Arabidopsis thaliana GN=PERK2 PE=2 SV=3	4	258-275	1	GO:0016021(integral to membrane);GO:0005886(plasma membrane);GO:0005524(ATP binding);GO:0004674(protein serine/threonine kinase activity);GO:0004872(receptor activity)
miR7760-p3_2	TRINITY_DN3069_c78_g1	TRINITY_DN3069_c78_g1	-	4	117-134	1
miR7760-p3_2	TRINITY_DN11165_c0_g1	TRINITY_DN11165_c0_g1	sp|Q99070|GRP2_SORBI Glycine-rich RNA-binding protein 2 OS=Sorghum bicolor GN=GRP2 PE=2 SV=1	4	10-27	1	GO:0000166(nucleotide binding);GO:0003723(RNA binding)
miR7760-p3_2	TRINITY_DN14409_c0_g1	TRINITY_DN14409_c0_g1	-	4	535-552	1
miR7760-p3_2	TRINITY_DN32360_c1_g1	TRINITY_DN32360_c1_g1	sp|Q8VYZ0|ORTH2_ARATH E3 ubiquitin-protein ligase ORTHRUS 2 OS=Arabidopsis thaliana GN=ORTH2 PE=1 SV=1	4	3134-3151	1	GO:0010369(chromocenter);GO:0005634(nucleus);GO:0003682(chromatin binding);GO:0010385(double-stranded methylated DNA binding);GO:0042393(histone binding);GO:0008327(methyl-CpG binding);GO:0010428(methyl-CpNpG binding);GO:0010429(methyl-CpNpN binding);GO:0004842(ubiquitin-protein ligase activity);GO:0008270(zinc ion binding);GO:0051301(cell division);GO:0031508(centromeric heterochromatin formatio…
miR7760-p3_2	TRINITY_DN19931_c0_g1	TRINITY_DN19931_c0_g1	sp|O65023|EAAC_ARATH Probable envelope ADP,ATP carrier protein, chloroplastic OS=Arabidopsis thaliana GN=EAAC PE=2 SV=2	4	1457-1474	1	GO:0031969(chloroplast membrane);GO:0016021(integral to membrane);GO:0005743(mitochondrial inner membrane);GO:0005488(binding);GO:0009624(response to nematode);GO:0055085(transmembrane transport)
miR7760-p3_2	TRINITY_DN18225_c0_g1	TRINITY_DN18225_c0_g1	-	4	270-287	1
miR7760-p3_2	TRINITY_DN32360_c1_g1	TRINITY_DN32360_c1_g1	sp|Q8VYZ0|ORTH2_ARATH E3 ubiquitin-protein ligase ORTHRUS 2 OS=Arabidopsis thaliana GN=ORTH2 PE=1 SV=1	4	3267-3284	1	GO:0010369(chromocenter);GO:0005634(nucleus);GO:0003682(chromatin binding);GO:0010385(double-stranded methylated DNA binding);GO:0042393(histone binding);GO:0008327(methyl-CpG binding);GO:0010428(methyl-CpNpG binding);GO:0010429(methyl-CpNpN binding);GO:0004842(ubiquitin-protein ligase activity);GO:0008270(zinc ion binding);GO:0051301(cell division);GO:0031508(centromeric heterochromatin formatio…
miR7760-p3_1	TRINITY_DN48124_c0_g1	TRINITY_DN48124_c0_g1	-	0	68-85	1
miR7760-p3_1	TRINITY_DN19742_c2_g1	TRINITY_DN19742_c2_g1	sp|Q9SX31|PERK9_ARATH Proline-rich receptor-like protein kinase PERK9 OS=Arabidopsis thaliana GN=PERK9 PE=2 SV=1	0	221-238	1	GO:0016021(integral to membrane);GO:0005886(plasma membrane);GO:0005524(ATP binding);GO:0004674(protein serine/threonine kinase activity)
miR7760-p3_1	TRINITY_DN19742_c2_g2	TRINITY_DN19742_c2_g2	-	0	74-91	1
miR7760-p3_1	TRINITY_DN31452_c0_g1	TRINITY_DN31452_c0_g1	sp|P45726|PALY_CAMSI Phenylalanine ammonia-lyase OS=Camellia sinensis GN=PAL PE=2 SV=1	0	2127-2144	1	GO:0005737(cytoplasm);GO:0016841(ammonia-lyase activity);GO:0009058(biosynthetic process);GO:0006559(L-phenylalanine catabolic process);GO:0009698(phenylpropanoid metabolic process)	ko00360(Phenylalanine metabolism);ko00910(Nitrogen metabolism);ko00940(Phenylpropanoid biosynthesis)
miR7760-p3_1	TRINITY_DN19742_c2_g1	TRINITY_DN19742_c2_g1	sp|Q9SX31|PERK9_ARATH Proline-rich receptor-like protein kinase PERK9 OS=Arabidopsis thaliana GN=PERK9 PE=2 SV=1	0	74-91	1	GO:0016021(integral to membrane);GO:0005886(plasma membrane);GO:0005524(ATP binding);GO:0004674(protein serine/threonine kinase activity)
miR7760-p3_1	TRINITY_DN1655_c0_g1	TRINITY_DN1655_c0_g1	-	2	270-287	1
miR7760-p3_1	TRINITY_DN1655_c0_g2	TRINITY_DN1655_c0_g2	-	2	270-287	1
miR7760-p3_1	TRINITY_DN33230_c0_g1	TRINITY_DN33230_c0_g1	sp|Q7PC88|AB31G_ARATH ABC transporter G family member 31 OS=Arabidopsis thaliana GN=ABCG31 PE=2 SV=1	2	54-71	1	GO:0016021(integral to membrane);GO:0009506(plasmodesma);GO:0005524(ATP binding);GO:0016887(ATPase activity);GO:0006810(transport)
miR7760-p3_1	TRINITY_DN50220_c0_g1	TRINITY_DN50220_c0_g1	-	2	72-89	1
miR7760-p3_1	TRINITY_DN22873_c0_g3	TRINITY_DN22873_c0_g3	-	2	379-396	1		ko03022(Basal transcription factors)
miR7760-p3_1	TRINITY_DN20249_c0_g1	TRINITY_DN20249_c0_g1	sp|Q9C518|TCP8_ARATH Transcription factor TCP8 OS=Arabidopsis thaliana GN=TCP8 PE=2 SV=1	2	687-704	1	GO:0005634(nucleus);GO:0001047(core promoter binding);GO:0006355(regulation of transcription, DNA-dependent);GO:0006351(transcription, DNA-dependent)
miR7760-p3_1	TRINITY_DN6920_c0_g1	TRINITY_DN6920_c0_g1	sp|O64847|U136_ARATH UPF0136 membrane protein At2g26240 OS=Arabidopsis thaliana GN=At2g26240 PE=3 SV=1	2	722-739	1	GO:0016021(integral to membrane);GO:0005739(mitochondrion)
miR7760-p3_1	TRINITY_DN23063_c0_g1	TRINITY_DN23063_c0_g1	-	2	270-287	1
miR7760-p3_1	TRINITY_DN32225_c2_g1	TRINITY_DN32225_c2_g1	sp|Q69UP6|AGO18_ORYSJ Protein argonaute 18 OS=Oryza sativa subsp. japonica GN=AGO18 PE=2 SV=1	2	149-166	1	GO:0003676(nucleic acid binding);GO:0031047(gene silencing by RNA)
miR7760-p3_1	TRINITY_DN29057_c0_g1	TRINITY_DN29057_c0_g1	sp|Q8GYL9|BRXL2_ARATH Protein Brevis radix-like 2 OS=Arabidopsis thaliana GN=BRXL2 PE=2 SV=1	2	1240-1257	1	GO:0005634(nucleus)
miR7760-p3_1	TRINITY_DN30890_c0_g1	TRINITY_DN30890_c0_g1	sp|Q9SCS2|CAMK5_ARATH CDPK-related kinase 5 OS=Arabidopsis thaliana GN=CRK5 PE=1 SV=1	2	1943-1960	1
miR7760-p3_1	TRINITY_DN31782_c1_g1	TRINITY_DN31782_c1_g1	-	2	457-473	1
miR7760-p3_1	TRINITY_DN27761_c2_g3	TRINITY_DN27761_c2_g3	sp|O81316|SCL6_ARATH Scarecrow-like protein 6 OS=Arabidopsis thaliana GN=SCL6 PE=1 SV=1	2	2318-2335	1	GO:0005634(nucleus);GO:0005515(protein binding);GO:0051301(cell division);GO:0007623(circadian rhythm);GO:0006355(regulation of transcription, DNA-dependent);GO:0048768(root hair cell tip growth);GO:0006351(transcription, DNA-dependent)
miR7760-p3_1	TRINITY_DN49214_c0_g1	TRINITY_DN49214_c0_g1	sp|Q9LY50|ACCR3_ARATH Putative serine/threonine-protein kinase-like protein CCR3 OS=Arabidopsis thaliana GN=CCR3 PE=2 SV=1	2	194-211	1	GO:0016021(integral to membrane);GO:0005524(ATP binding);GO:0042803(protein homodimerization activity);GO:0004674(protein serine/threonine kinase activity);GO:0004872(receptor activity)
miR7760-p3_1	TRINITY_DN42205_c0_g1	TRINITY_DN42205_c0_g1	-	2.5	198-215	1
miR7760-p3_1	TRINITY_DN8437_c0_g1	TRINITY_DN8437_c0_g1	sp|Q8VZT0|NLAL1_ARATH Putative H/ACA ribonucleoprotein complex subunit 1-like protein 1 OS=Arabidopsis thaliana GN=At3g03920 PE=2 SV=1	2.5	239-256	1	GO:0031429(box H/ACA snoRNP complex);GO:0009535(chloroplast thylakoid membrane);GO:0009982(pseudouridine synthase activity);GO:0030515(snoRNA binding);GO:0006364(rRNA processing);GO:0031120(snRNA pseudouridine synthesis)
miR7760-p3_1	TRINITY_DN38629_c0_g1	TRINITY_DN38629_c0_g1	-	2.5	46-63	1
miR7760-p3_1	TRINITY_DN28305_c0_g2	TRINITY_DN28305_c0_g2	-	2.5	130-147	1
miR7760-p3_1	TRINITY_DN25855_c0_g3	TRINITY_DN25855_c0_g3	-	2.5	101-118	1
miR7760-p3_1	TRINITY_DN28091_c0_g3	TRINITY_DN28091_c0_g3	sp|Q9M0R2|PATL5_ARATH Patellin-5 OS=Arabidopsis thaliana GN=PATL5 PE=1 SV=2	2.5	2126-2143	1	GO:0009507(chloroplast);GO:0016021(integral to membrane);GO:0008289(lipid binding);GO:0007049(cell cycle);GO:0051301(cell division);GO:0006810(transport)
miR7760-p3_1	TRINITY_DN25855_c0_g4	TRINITY_DN25855_c0_g4	-	2.5	134-151	1
miR7760-p3_1	TRINITY_DN32207_c1_g1	TRINITY_DN32207_c1_g1	sp|Q869E1|DNLI1_DICDI DNA ligase 1 OS=Dictyostelium discoideum GN=lig1 PE=3 SV=1	2.5	343-360	1	GO:0005634(nucleus);GO:0005524(ATP binding);GO:0003677(DNA binding);GO:0003910(DNA ligase );GO:0046872(metal ion binding);GO:0007049(cell cycle);GO:0051301(cell division);GO:0051103(DNA ligation involved in DNA repair);GO:0006310(DNA recombination);GO:0006260(DNA replication)
miR7760-p3_1	TRINITY_DN23753_c0_g6	TRINITY_DN23753_c0_g6	-	2.5	379-396	1
miR7760-p3_1	TRINITY_DN23753_c0_g5	TRINITY_DN23753_c0_g5	sp|Q8H0U8|RH42_ARATH DEAD-box ATP-dependent RNA helicase 42 OS=Arabidopsis thaliana GN=RH42 PE=1 SV=2	2.5	379-396	1	GO:0005524(ATP binding);GO:0008026(ATP-dependent helicase activity);GO:0003723(RNA binding)
miR7760-p3_1	TRINITY_DN23753_c0_g1	TRINITY_DN23753_c0_g1	-	2.5	379-396	1
miR7760-p3_1	TRINITY_DN28305_c0_g3	TRINITY_DN28305_c0_g3	-	2.5	331-348	1
miR7760-p3_1	TRINITY_DN28305_c0_g1	TRINITY_DN28305_c0_g1	-	2.5	343-360	1
miR7760-p3_1	TRINITY_DN27213_c0_g2	TRINITY_DN27213_c0_g2	-	2.5	591-608	1
miR7760-p3_1	TRINITY_DN31035_c0_g1	TRINITY_DN31035_c0_g1	sp|Q8GZA4|CBSX6_ARATH CBS domain-containing protein CBSX6 OS=Arabidopsis thaliana GN=CBSX6 PE=1 SV=1	2.5	1381-1398	1	GO:0016021(integral to membrane);GO:0005774(vacuolar membrane)
miR7760-p3_1	TRINITY_DN30629_c0_g1	TRINITY_DN30629_c0_g1	sp|Q08641|AB140_YEAST Uncharacterized methyltransferase ABP140 OS=Saccharomyces cerevisiae (strain ATCC 204508 / S288c) GN=ABP140 PE=1 SV=3	2.5	1261-1278	1	GO:0030479(actin cortical patch);GO:0005884(actin filament);GO:0032432(actin filament bundle);GO:0043332(mating projection tip);GO:0051015(actin filament binding);GO:0030674(protein binding, bridging);GO:0016427(tRNA );GO:0051017(actin filament bundle assembly)	ko00340(Histidine metabolism);ko00350(Tyrosine metabolism);ko00450(Selenoamino acid metabolism);ko00626(Naphthalene and anthracene degradation)
miR7760-p3_1	TRINITY_DN22873_c0_g6	TRINITY_DN22873_c0_g6	-	2.5	275-291	1
miR7760-p3_1	TRINITY_DN22873_c0_g5	TRINITY_DN22873_c0_g5	-	2.5	275-291	1
miR7760-p3_1	TRINITY_DN22873_c0_g2	TRINITY_DN22873_c0_g2	sp|P09406|RU17_XENLA U1 small nuclear ribonucleoprotein 70 kDa OS=Xenopus laevis GN=snrnp70 PE=2 SV=1	2.5	291-307	1	GO:0005681(spliceosomal complex);GO:0000166(nucleotide binding);GO:0003723(RNA binding);GO:0000398(nuclear mRNA splicing, via spliceosome);GO:0043484(regulation of RNA splicing)	ko03040(Spliceosome)
miR7760-p3_1	TRINITY_DN17529_c0_g2	TRINITY_DN17529_c0_g2	sp|Q8R317|UBQL1_MOUSE Ubiquilin-1 OS=Mus musculus GN=Ubqln1 PE=1 SV=1	2.5	1985-2002	1	GO:0005783(endoplasmic reticulum);GO:0005634(nucleus);GO:0048471(perinuclear region of cytoplasm);GO:0000502(proteasome complex);GO:0019215(intermediate filament binding);GO:0019900(kinase binding);GO:0005102(receptor binding);GO:0006915(apoptosis);GO:0031396(regulation of protein ubiquitination);GO:0001666(response to hypoxia)
miR7760-p3_1	TRINITY_DN27213_c0_g1	TRINITY_DN27213_c0_g1	-	2.5	591-608	1
miR7760-p3_1	TRINITY_DN28426_c1_g2	TRINITY_DN28426_c1_g2	-	2.5	1536-1553	1
miR7760-p3_1	TRINITY_DN25967_c0_g1	TRINITY_DN25967_c0_g1	-	2.5	2338-2355	1
miR7760-p3_1	TRINITY_DN25855_c0_g5	TRINITY_DN25855_c0_g5	-	2.5	148-165	1
miR7760-p3_1	TRINITY_DN25855_c0_g7	TRINITY_DN25855_c0_g7	-	2.5	150-167	1
miR7760-p3_1	TRINITY_DN25855_c0_g6	TRINITY_DN25855_c0_g6	-	2.5	152-169	1
miR7760-p3_1	TRINITY_DN25855_c0_g2	TRINITY_DN25855_c0_g2	-	2.5	154-171	1
miR7760-p3_1	TRINITY_DN25855_c0_g1	TRINITY_DN25855_c0_g1	-	2.5	156-173	1
miR7760-p3_1	TRINITY_DN42300_c0_g1	TRINITY_DN42300_c0_g1	sp|Q9LV48|PERK1_ARATH Proline-rich receptor-like protein kinase PERK1 OS=Arabidopsis thaliana GN=PERK1 PE=1 SV=1	3	142-159	1	GO:0016021(integral to membrane);GO:0005886(plasma membrane);GO:0005524(ATP binding);GO:0004674(protein serine/threonine kinase activity);GO:0046777(protein autophosphorylation)	ko00270(Cysteine and methionine metabolism)
miR7760-p3_1	TRINITY_DN5321_c0_g1	TRINITY_DN5321_c0_g1	sp|O22808|LYK5_ARATH Protein LYK5 OS=Arabidopsis thaliana GN=LYK5 PE=1 SV=1	3	29-46	1
miR7760-p3_1	TRINITY_DN49850_c1_g1	TRINITY_DN49850_c1_g1	-	3	360-377	1
miR7760-p3_1	TRINITY_DN18039_c1_g1	TRINITY_DN18039_c1_g1	-	3	497-514	1
miR7760-p3_1	TRINITY_DN30020_c0_g9	TRINITY_DN30020_c0_g9	-	3	186-203	1
miR7760-p3_1	TRINITY_DN28583_c0_g1	TRINITY_DN28583_c0_g1	-	3	468-485	1
miR7760-p3_1	TRINITY_DN23773_c0_g1	TRINITY_DN23773_c0_g1	sp|Q10LG8|TLP6_ORYSJ Tubby-like F-box protein 6 OS=Oryza sativa subsp. japonica GN=TULP6 PE=2 SV=1	3	2096-2113	1
miR7760-p3_1	TRINITY_DN26189_c1_g2	TRINITY_DN26189_c1_g2	sp|D7MMW4|CSPLJ_ARALL CASP-like protein ARALYDRAFT_919556 OS=Arabidopsis lyrata subsp. lyrata GN=ARALYDRAFT_919556 PE=3 SV=1	3	723-740	1
miR7760-p3_1	TRINITY_DN29914_c1_g1	TRINITY_DN29914_c1_g1	-	3	334-351	1
miR7760-p3_1	TRINITY_DN27736_c0_g1	TRINITY_DN27736_c0_g1	sp|Q4PSU4|AGL61_ARATH Agamous-like MADS-box protein AGL61 OS=Arabidopsis thaliana GN=AGL61 PE=1 SV=1	3	267-284	1	GO:0005634(nucleus);GO:0005515(protein binding);GO:0043565(sequence-specific DNA binding);GO:0003700(sequence-specific DNA binding transcription factor activity);GO:0009559(embryo sac central cell differentiation)
miR7760-p3_1	TRINITY_DN25635_c0_g1	TRINITY_DN25635_c0_g1	sp|Q9SYM2|STHY_ARATH Probable salt tolerance-like protein At1g78600 OS=Arabidopsis thaliana GN=At1g78600 PE=1 SV=2	3	1170-1187	1	GO:0016607(nuclear speck);GO:0005515(protein binding);GO:0008270(zinc ion binding);GO:0009718(anthocyanin biosynthetic process);GO:0015995(chlorophyll biosynthetic process);GO:0009658(chloroplast organization);GO:0010099(regulation of photomorphogenesis);GO:0006355(regulation of transcription, DNA-dependent);GO:0009641(shade avoidance)
miR7760-p3_1	TRINITY_DN6682_c0_g1	TRINITY_DN6682_c0_g1	sp|Q9C660|PEK10_ARATH Proline-rich receptor-like protein kinase PERK10 OS=Arabidopsis thaliana GN=PERK10 PE=1 SV=2	3	490-507	1	GO:0016021(integral to membrane);GO:0005886(plasma membrane);GO:0005524(ATP binding);GO:0004674(protein serine/threonine kinase activity)
miR7760-p3_1	TRINITY_DN28768_c0_g1	TRINITY_DN28768_c0_g1	sp|Q22037|ROA1_CAEEL Heterogeneous nuclear ribonucleoprotein A1 OS=Caenorhabditis elegans GN=hrp-1 PE=1 SV=1	3	5058-5075	1	GO:0000781(chromosome, telomeric region);GO:0005634(nucleus);GO:0030529(ribonucleoprotein complex);GO:0000166(nucleotide binding);GO:0003723(RNA binding);GO:0008340(determination of adult lifespan);GO:0009792(embryo development ending in birth or egg hatching);GO:0040007(growth);GO:0031581(hemidesmosome assembly);GO:0040035(hermaphrodite genitalia development);GO:0002009(morphogenesis of an epith…
miR7760-p3_1	TRINITY_DN18611_c0_g2	TRINITY_DN18611_c0_g2	-	3	144-161	1
miR7760-p3_1	TRINITY_DN4083_c0_g5	TRINITY_DN4083_c0_g5	-	3	48-65	1
miR7760-p3_1	TRINITY_DN4083_c0_g6	TRINITY_DN4083_c0_g6	-	3	48-65	1
miR7760-p3_1	TRINITY_DN4083_c0_g3	TRINITY_DN4083_c0_g3	sp|A4QSS5|DBP2_MAGO7 ATP-dependent RNA helicase DBP2 OS=Magnaporthe oryzae (strain 70-15 / ATCC MYA-4617 / FGSC 8958) GN=DBP2 PE=3 SV=1	3	48-65	1	GO:0005737(cytoplasm);GO:0005634(nucleus);GO:0005524(ATP binding);GO:0008026(ATP-dependent helicase activity);GO:0003723(RNA binding);GO:0000184(nuclear-transcribed mRNA catabolic process, nonsense-mediated decay);GO:0006364(rRNA processing)
miR7760-p3_1	TRINITY_DN4083_c0_g1	TRINITY_DN4083_c0_g1	-	3	48-65	1
miR7760-p3_1	TRINITY_DN4083_c0_g10	TRINITY_DN4083_c0_g10	-	3	48-65	1
miR7760-p3_1	TRINITY_DN48413_c0_g1	TRINITY_DN48413_c0_g1	-	3	205-222	1
miR7760-p3_1	TRINITY_DN3174_c0_g1	TRINITY_DN3174_c0_g1	sp|P49730|RIR2_TOBAC Ribonucleoside-diphosphate reductase small chain OS=Nicotiana tabacum PE=2 SV=1	3	416-433	1	GO:0005737(cytoplasm);GO:0004748(ribonucleoside-diphosphate reductase activity);GO:0046914(transition metal ion binding);GO:0009186(deoxyribonucleoside diphosphate metabolic process);GO:0006260(DNA replication)	ko00230(Purine metabolism);ko00240(Pyrimidine metabolism);ko00480(Glutathione metabolism);ko04115(p53 signaling pathway)
miR7760-p3_1	TRINITY_DN3174_c0_g2	TRINITY_DN3174_c0_g2	sp|P49730|RIR2_TOBAC Ribonucleoside-diphosphate reductase small chain OS=Nicotiana tabacum PE=2 SV=1	3	416-433	1	GO:0005737(cytoplasm);GO:0004748(ribonucleoside-diphosphate reductase activity);GO:0046914(transition metal ion binding);GO:0009186(deoxyribonucleoside diphosphate metabolic process);GO:0006260(DNA replication)	ko00230(Purine metabolism);ko00240(Pyrimidine metabolism);ko00480(Glutathione metabolism);ko04115(p53 signaling pathway)
miR7760-p3_1	TRINITY_DN27309_c1_g2	TRINITY_DN27309_c1_g2	sp|Q8N7N5|DCAF8_MOUSE DDB1- and CUL4-associated factor 8 OS=Mus musculus GN=Dcaf8 PE=1 SV=1	3	690-707	1	GO:0080008(CUL4 RING ubiquitin ligase complex)
miR7760-p3_1	TRINITY_DN24990_c1_g3	TRINITY_DN24990_c1_g3	sp|Q9H0Z9|RBM38_HUMAN RNA-binding protein 38 OS=Homo sapiens GN=RBM38 PE=1 SV=2	3	150-167	1	GO:0005829(cytosol);GO:0005634(nucleus);GO:0003730(mRNA 3'-UTR binding);GO:0003729(mRNA binding);GO:0000166(nucleotide binding);GO:0070935(3'-UTR-mediated mRNA stabilization);GO:0007049(cell cycle);GO:0007050(cell cycle arrest);GO:0030154(cell differentiation);GO:0006977(DNA damage response, signal transduction by p53 class mediator resulting in cell cycle arrest);GO:0006978(DNA damage response, …
miR7760-p3_1	TRINITY_DN24990_c1_g6	TRINITY_DN24990_c1_g6	sp|Q9H0Z9|RBM38_HUMAN RNA-binding protein 38 OS=Homo sapiens GN=RBM38 PE=1 SV=2	3	150-167	1	GO:0005829(cytosol);GO:0005634(nucleus);GO:0003730(mRNA 3'-UTR binding);GO:0003729(mRNA binding);GO:0000166(nucleotide binding);GO:0070935(3'-UTR-mediated mRNA stabilization);GO:0007049(cell cycle);GO:0007050(cell cycle arrest);GO:0030154(cell differentiation);GO:0006977(DNA damage response, signal transduction by p53 class mediator resulting in cell cycle arrest);GO:0006978(DNA damage response, …
miR7760-p3_1	TRINITY_DN26455_c0_g1	TRINITY_DN26455_c0_g1	sp|Q9LMX5|AFP2_ARATH Ninja-family protein AFP2 OS=Arabidopsis thaliana GN=AFP2 PE=1 SV=1	3	769-786	1	GO:0005634(nucleus);GO:0005515(protein binding);GO:0009737(response to abscisic acid stimulus);GO:0006950(response to stress)
miR7760-p3_1	TRINITY_DN18611_c0_g1	TRINITY_DN18611_c0_g1	sp|Q84UQ1|RH42_ORYSJ DEAD-box ATP-dependent RNA helicase 42 OS=Oryza sativa subsp. japonica GN=Os08g0159900 PE=2 SV=1	3	303-320	1	GO:0005524(ATP binding);GO:0008026(ATP-dependent helicase activity);GO:0003723(RNA binding)
miR7760-p3_1	TRINITY_DN24990_c1_g8	TRINITY_DN24990_c1_g8	sp|Q9H0Z9|RBM38_HUMAN RNA-binding protein 38 OS=Homo sapiens GN=RBM38 PE=1 SV=2	3	150-167	1	GO:0005829(cytosol);GO:0005634(nucleus);GO:0003730(mRNA 3'-UTR binding);GO:0003729(mRNA binding);GO:0000166(nucleotide binding);GO:0070935(3'-UTR-mediated mRNA stabilization);GO:0007049(cell cycle);GO:0007050(cell cycle arrest);GO:0030154(cell differentiation);GO:0006977(DNA damage response, signal transduction by p53 class mediator resulting in cell cycle arrest);GO:0006978(DNA damage response, …
miR7760-p3_1	TRINITY_DN24990_c1_g12	TRINITY_DN24990_c1_g12	sp|Q9H0Z9|RBM38_HUMAN RNA-binding protein 38 OS=Homo sapiens GN=RBM38 PE=1 SV=2	3	150-167	1	GO:0005829(cytosol);GO:0005634(nucleus);GO:0003730(mRNA 3'-UTR binding);GO:0003729(mRNA binding);GO:0000166(nucleotide binding);GO:0070935(3'-UTR-mediated mRNA stabilization);GO:0007049(cell cycle);GO:0007050(cell cycle arrest);GO:0030154(cell differentiation);GO:0006977(DNA damage response, signal transduction by p53 class mediator resulting in cell cycle arrest);GO:0006978(DNA damage response, …
miR7760-p3_1	TRINITY_DN24990_c1_g5	TRINITY_DN24990_c1_g5	sp|Q9H0Z9|RBM38_HUMAN RNA-binding protein 38 OS=Homo sapiens GN=RBM38 PE=1 SV=2	3	150-167	1	GO:0005829(cytosol);GO:0005634(nucleus);GO:0003730(mRNA 3'-UTR binding);GO:0003729(mRNA binding);GO:0000166(nucleotide binding);GO:0070935(3'-UTR-mediated mRNA stabilization);GO:0007049(cell cycle);GO:0007050(cell cycle arrest);GO:0030154(cell differentiation);GO:0006977(DNA damage response, signal transduction by p53 class mediator resulting in cell cycle arrest);GO:0006978(DNA damage response, …
miR7760-p3_1	TRINITY_DN24990_c1_g7	TRINITY_DN24990_c1_g7	sp|Q9H0Z9|RBM38_HUMAN RNA-binding protein 38 OS=Homo sapiens GN=RBM38 PE=1 SV=2	3	150-167	1	GO:0005829(cytosol);GO:0005634(nucleus);GO:0003730(mRNA 3'-UTR binding);GO:0003729(mRNA binding);GO:0000166(nucleotide binding);GO:0070935(3'-UTR-mediated mRNA stabilization);GO:0007049(cell cycle);GO:0007050(cell cycle arrest);GO:0030154(cell differentiation);GO:0006977(DNA damage response, signal transduction by p53 class mediator resulting in cell cycle arrest);GO:0006978(DNA damage response, …
miR7760-p3_1	TRINITY_DN24990_c1_g4	TRINITY_DN24990_c1_g4	sp|Q9H0Z9|RBM38_HUMAN RNA-binding protein 38 OS=Homo sapiens GN=RBM38 PE=1 SV=2	3	150-167	1	GO:0005829(cytosol);GO:0005634(nucleus);GO:0003730(mRNA 3'-UTR binding);GO:0003729(mRNA binding);GO:0000166(nucleotide binding);GO:0070935(3'-UTR-mediated mRNA stabilization);GO:0007049(cell cycle);GO:0007050(cell cycle arrest);GO:0030154(cell differentiation);GO:0006977(DNA damage response, signal transduction by p53 class mediator resulting in cell cycle arrest);GO:0006978(DNA damage response, …
miR7760-p3_1	TRINITY_DN24990_c1_g2	TRINITY_DN24990_c1_g2	sp|Q9H0Z9|RBM38_HUMAN RNA-binding protein 38 OS=Homo sapiens GN=RBM38 PE=1 SV=2	3	150-167	1	GO:0005829(cytosol);GO:0005634(nucleus);GO:0003730(mRNA 3'-UTR binding);GO:0003729(mRNA binding);GO:0000166(nucleotide binding);GO:0070935(3'-UTR-mediated mRNA stabilization);GO:0007049(cell cycle);GO:0007050(cell cycle arrest);GO:0030154(cell differentiation);GO:0006977(DNA damage response, signal transduction by p53 class mediator resulting in cell cycle arrest);GO:0006978(DNA damage response, …
miR7760-p3_1	TRINITY_DN24990_c1_g10	TRINITY_DN24990_c1_g10	sp|Q9H0Z9|RBM38_HUMAN RNA-binding protein 38 OS=Homo sapiens GN=RBM38 PE=1 SV=2	3	150-167	1	GO:0005829(cytosol);GO:0005634(nucleus);GO:0003730(mRNA 3'-UTR binding);GO:0003729(mRNA binding);GO:0000166(nucleotide binding);GO:0070935(3'-UTR-mediated mRNA stabilization);GO:0007049(cell cycle);GO:0007050(cell cycle arrest);GO:0030154(cell differentiation);GO:0006977(DNA damage response, signal transduction by p53 class mediator resulting in cell cycle arrest);GO:0006978(DNA damage response, …
miR7760-p3_1	TRINITY_DN24990_c1_g9	TRINITY_DN24990_c1_g9	sp|Q9H0Z9|RBM38_HUMAN RNA-binding protein 38 OS=Homo sapiens GN=RBM38 PE=1 SV=2	3	150-167	1	GO:0005829(cytosol);GO:0005634(nucleus);GO:0003730(mRNA 3'-UTR binding);GO:0003729(mRNA binding);GO:0000166(nucleotide binding);GO:0070935(3'-UTR-mediated mRNA stabilization);GO:0007049(cell cycle);GO:0007050(cell cycle arrest);GO:0030154(cell differentiation);GO:0006977(DNA damage response, signal transduction by p53 class mediator resulting in cell cycle arrest);GO:0006978(DNA damage response, …
miR7760-p3_1	TRINITY_DN24990_c1_g1	TRINITY_DN24990_c1_g1	sp|Q9H0Z9|RBM38_HUMAN RNA-binding protein 38 OS=Homo sapiens GN=RBM38 PE=1 SV=2	3	150-167	1	GO:0005829(cytosol);GO:0005634(nucleus);GO:0003730(mRNA 3'-UTR binding);GO:0003729(mRNA binding);GO:0000166(nucleotide binding);GO:0070935(3'-UTR-mediated mRNA stabilization);GO:0007049(cell cycle);GO:0007050(cell cycle arrest);GO:0030154(cell differentiation);GO:0006977(DNA damage response, signal transduction by p53 class mediator resulting in cell cycle arrest);GO:0006978(DNA damage response, …
miR7760-p3_1	TRINITY_DN14940_c0_g1	TRINITY_DN14940_c0_g1	-	3	377-394	1
miR7760-p3_1	TRINITY_DN26371_c1_g1	TRINITY_DN26371_c1_g1	sp|Q8LPN7|RNG1L_ARATH E3 ubiquitin-protein ligase RING1-like OS=Arabidopsis thaliana GN=At3g19950 PE=2 SV=1	3	1873-1890	1	GO:0016874(ligase activity);GO:0008270(zinc ion binding)
miR7760-p3_1	TRINITY_DN36609_c0_g1	TRINITY_DN36609_c0_g1	-	3	111-128	1
miR7760-p3_1	TRINITY_DN36665_c0_g1	TRINITY_DN36665_c0_g1	-	3	19-36	1
miR7760-p3_1	TRINITY_DN24990_c1_g11	TRINITY_DN24990_c1_g11	sp|Q5ZJX4|RBM38_CHICK RNA-binding protein 38 OS=Gallus gallus GN=RBM38 PE=2 SV=1	3	712-729	1	GO:0005829(cytosol);GO:0005634(nucleus);GO:0000166(nucleotide binding);GO:0030154(cell differentiation);GO:0006397(mRNA processing);GO:0008380(RNA splicing)
miR7760-p3_1	TRINITY_DN25177_c0_g1	TRINITY_DN25177_c0_g1	-	3	2353-2370	1
miR7760-p3_1	TRINITY_DN20134_c0_g1	TRINITY_DN20134_c0_g1	sp|Q9S7Y1|BH030_ARATH Transcription factor bHLH30 OS=Arabidopsis thaliana GN=BHLH30 PE=1 SV=1	3	524-541	1	GO:0005634(nucleus);GO:0003677(DNA binding);GO:0006355(regulation of transcription, DNA-dependent);GO:0006351(transcription, DNA-dependent)
miR7760-p3_1	TRINITY_DN28310_c0_g1	TRINITY_DN28310_c0_g1	sp|O65020|ETO1_ARATH Ethylene-overproduction protein 1 OS=Arabidopsis thaliana GN=ETO1 PE=1 SV=2	3	3459-3476	1	GO:0030674(protein binding, bridging);GO:0009873(ethylene mediated signaling pathway);GO:0043161(proteasomal ubiquitin-dependent protein catabolic process);GO:0010364(regulation of ethylene biosynthetic process);GO:2000069(regulation of post-embryonic root development);GO:0017145(stem cell division);GO:0010182(sugar mediated signaling pathway)
miR7760-p3_1	TRINITY_DN11165_c0_g1	TRINITY_DN11165_c0_g1	sp|Q99070|GRP2_SORBI Glycine-rich RNA-binding protein 2 OS=Sorghum bicolor GN=GRP2 PE=2 SV=1	3	36-54	1	GO:0000166(nucleotide binding);GO:0003723(RNA binding)
miR7760-p3_1	TRINITY_DN11403_c0_g1	TRINITY_DN11403_c0_g1	sp|Q41188|CSP2_ARATH Cold shock protein 2 OS=Arabidopsis thaliana GN=CSP2 PE=1 SV=1	3	767-784	1
miR7760-p3_1	TRINITY_DN530_c0_g1	TRINITY_DN530_c0_g1	-	3	491-508	1
miR7760-p3_1	TRINITY_DN15629_c0_g2	TRINITY_DN15629_c0_g2	-	3	1118-1135	1
miR7760-p3_1	TRINITY_DN15629_c0_g1	TRINITY_DN15629_c0_g1	-	3	1118-1135	1
miR7760-p3_1	TRINITY_DN26545_c0_g1	TRINITY_DN26545_c0_g1	sp|Q6PKG0|LARP1_HUMAN La-related protein 1 OS=Homo sapiens GN=LARP1 PE=1 SV=2	3	2044-2061	1	GO:0003723(RNA binding)
miR7760-p3_1	TRINITY_DN30664_c0_g1	TRINITY_DN30664_c0_g1	-	3	2148-2165	1
miR7760-p3_1	TRINITY_DN15629_c0_g3	TRINITY_DN15629_c0_g3	-	3	1118-1135	1
miR7760-p3_1	TRINITY_DN20134_c0_g2	TRINITY_DN20134_c0_g2	sp|Q9S7Y1|BH030_ARATH Transcription factor bHLH30 OS=Arabidopsis thaliana GN=BHLH30 PE=1 SV=1	3	1630-1647	1	GO:0005634(nucleus);GO:0003677(DNA binding);GO:0006355(regulation of transcription, DNA-dependent);GO:0006351(transcription, DNA-dependent)
miR7760-p3_1	TRINITY_DN23813_c0_g1	TRINITY_DN23813_c0_g1	sp|Q43848|TKTC_SOLTU Transketolase, chloroplastic OS=Solanum tuberosum PE=2 SV=1	3	2419-2436	1	GO:0009535(chloroplast thylakoid membrane);GO:0046872(metal ion binding);GO:0004802(transketolase activity)	ko00030(Pentose phosphate pathway);ko00710(Carbon fixation in photosynthetic organisms);ko01051(Biosynthesis of ansamycins)
miR7760-p3_1	TRINITY_DN18460_c0_g1	TRINITY_DN18460_c0_g1	-	3	1-18	1
miR7760-p3_1	TRINITY_DN18467_c0_g1	TRINITY_DN18467_c0_g1	sp|Q681X4|ZAT5_ARATH Zinc finger protein ZAT5 OS=Arabidopsis thaliana GN=ZAT5 PE=2 SV=1	3	912-929	1	GO:0005634(nucleus);GO:0003676(nucleic acid binding);GO:0008270(zinc ion binding);GO:0006355(regulation of transcription, DNA-dependent);GO:0006351(transcription, DNA-dependent)
miR7760-p3_1	TRINITY_DN23942_c0_g1	TRINITY_DN23942_c0_g1	sp|Q6XBF8|CDR1_ARATH Aspartic proteinase CDR1 OS=Arabidopsis thaliana GN=CDR1 PE=1 SV=1	3	96-113	1
miR7760-p3_1	TRINITY_DN621_c0_g1	TRINITY_DN621_c0_g1	-	3	764-781	1		ko00290(Valine,ko leucine and isoleucine biosynthesis);ko00970(Aminoacyl-tRNA biosynthesis)
miR7760-p3_1	TRINITY_DN30654_c0_g2	TRINITY_DN30654_c0_g2	sp|Q6DEL2|CLPT1_DANRE Cleft lip and palate transmembrane protein 1 homolog OS=Danio rerio GN=clptm1 PE=2 SV=1	3	2090-2107	1	GO:0016021(integral to membrane);GO:0030154(cell differentiation);GO:0007275(multicellular organismal development)
miR7760-p3_1	TRINITY_DN21396_c0_g1	TRINITY_DN21396_c0_g1	-	3	1983-2000	1
miR7760-p3_1	TRINITY_DN27735_c0_g1	TRINITY_DN27735_c0_g1	sp|Q84W89|RH37_ARATH DEAD-box ATP-dependent RNA helicase 37 OS=Arabidopsis thaliana GN=RH37 PE=2 SV=2	3	828-845	1	GO:0005777(peroxisome);GO:0005524(ATP binding);GO:0008026(ATP-dependent helicase activity);GO:0003723(RNA binding)	ko04622(RIG-I-like receptor signaling pathway)
miR7760-p3_1	TRINITY_DN32461_c0_g1	TRINITY_DN32461_c0_g1	-	3	2647-2664	1
miR7760-p3_1	TRINITY_DN27133_c2_g1	TRINITY_DN27133_c2_g1	sp|Q8W4I7|CDPKD_ARATH Calcium-dependent protein kinase 13 OS=Arabidopsis thaliana GN=CPK13 PE=1 SV=2	3	1848-1866	1	GO:0005886(plasma membrane);GO:0005524(ATP binding);GO:0005509(calcium ion binding);GO:0004674(protein serine/threonine kinase activity);GO:0046777(protein autophosphorylation)
miR7760-p3_1	TRINITY_DN25543_c0_g2	TRINITY_DN25543_c0_g2	-	3	918-935	1
miR7760-p3_1	TRINITY_DN26231_c0_g2	TRINITY_DN26231_c0_g2	-	3	1302-1319	1
miR7760-p3_1	TRINITY_DN8437_c0_g1	TRINITY_DN8437_c0_g1	sp|Q8VZT0|NLAL1_ARATH Putative H/ACA ribonucleoprotein complex subunit 1-like protein 1 OS=Arabidopsis thaliana GN=At3g03920 PE=2 SV=1	3	725-742	1	GO:0031429(box H/ACA snoRNP complex);GO:0009535(chloroplast thylakoid membrane);GO:0009982(pseudouridine synthase activity);GO:0030515(snoRNA binding);GO:0006364(rRNA processing);GO:0031120(snRNA pseudouridine synthesis)
miR7760-p3_1	TRINITY_DN29914_c1_g1	TRINITY_DN29914_c1_g1	-	3	352-369	1
miR7760-p3_1	TRINITY_DN23543_c0_g1	TRINITY_DN23543_c0_g1	-	3	324-341	1
miR7760-p3_1	TRINITY_DN18611_c0_g1	TRINITY_DN18611_c0_g1	sp|Q84UQ1|RH42_ORYSJ DEAD-box ATP-dependent RNA helicase 42 OS=Oryza sativa subsp. japonica GN=Os08g0159900 PE=2 SV=1	3	119-136	1	GO:0005524(ATP binding);GO:0008026(ATP-dependent helicase activity);GO:0003723(RNA binding)
miR7760-p3_1	TRINITY_DN3971_c0_g2	TRINITY_DN3971_c0_g2	-	3	918-935	1
miR7760-p3_1	TRINITY_DN11165_c0_g1	TRINITY_DN11165_c0_g1	sp|Q99070|GRP2_SORBI Glycine-rich RNA-binding protein 2 OS=Sorghum bicolor GN=GRP2 PE=2 SV=1	3	6-24	1	GO:0000166(nucleotide binding);GO:0003723(RNA binding)
miR7760-p3_1	TRINITY_DN19088_c0_g2	TRINITY_DN19088_c0_g2	-	3.5	193-210	1
miR7760-p3_1	TRINITY_DN19088_c0_g1	TRINITY_DN19088_c0_g1	-	3.5	193-210	1
miR7760-p3_1	TRINITY_DN19104_c0_g2	TRINITY_DN19104_c0_g2	-	3.5	96-113	1
miR7760-p3_1	TRINITY_DN33546_c0_g1	TRINITY_DN33546_c0_g1	-	3.5	202-219	1
miR7760-p3_1	TRINITY_DN24550_c0_g1	TRINITY_DN24550_c0_g1	sp|Q9SB52|PUMP4_ARATH Mitochondrial uncoupling protein 4 OS=Arabidopsis thaliana GN=PUMP4 PE=2 SV=1	3.5	262-279	1
miR7760-p3_1	TRINITY_DN24095_c1_g3	TRINITY_DN24095_c1_g3	-	3.5	136-153	1
miR7760-p3_1	TRINITY_DN24095_c1_g1	TRINITY_DN24095_c1_g1	-	3.5	136-153	1
miR7760-p3_1	TRINITY_DN24095_c1_g2	TRINITY_DN24095_c1_g2	-	3.5	136-153	1
miR7760-p3_1	TRINITY_DN22889_c3_g1	TRINITY_DN22889_c3_g1	-	3.5	242-259	1
miR7760-p3_1	TRINITY_DN12614_c0_g2	TRINITY_DN12614_c0_g2	-	3.5	77-94	1
miR7760-p3_1	TRINITY_DN12614_c0_g3	TRINITY_DN12614_c0_g3	-	3.5	77-94	1
miR7760-p3_1	TRINITY_DN12614_c0_g1	TRINITY_DN12614_c0_g1	-	3.5	77-94	1
miR7760-p3_1	TRINITY_DN23543_c0_g1	TRINITY_DN23543_c0_g1	-	3.5	306-323	1
miR7760-p3_1	TRINITY_DN23362_c0_g1	TRINITY_DN23362_c0_g1	-	3.5	763-780	1
miR7760-p3_1	TRINITY_DN20978_c0_g3	TRINITY_DN20978_c0_g3	-	3.5	38-55	1
miR7760-p3_1	TRINITY_DN19742_c0_g1	TRINITY_DN19742_c0_g1	-	3.5	441-458	1
miR7760-p3_1	TRINITY_DN19742_c0_g2	TRINITY_DN19742_c0_g2	-	3.5	447-464	1
miR7760-p3_1	TRINITY_DN34714_c0_g1	TRINITY_DN34714_c0_g1	-	3.5	70-87	1
miR7760-p3_1	TRINITY_DN31902_c1_g5	TRINITY_DN31902_c1_g5	-	3.5	2-18	1
miR7760-p3_1	TRINITY_DN15432_c0_g1	TRINITY_DN15432_c0_g1	sp|Q9SZN7|HIP26_ARATH Heavy metal-associated isoprenylated plant protein 26 OS=Arabidopsis thaliana GN=HIPP26 PE=1 SV=1	3.5	577-594	1
miR7760-p3_1	TRINITY_DN31902_c1_g1	TRINITY_DN31902_c1_g1	-	3.5	102-118	1
miR7760-p3_1	TRINITY_DN31902_c1_g6	TRINITY_DN31902_c1_g6	-	3.5	2-18	1
miR7760-p3_1	TRINITY_DN29274_c0_g1	TRINITY_DN29274_c0_g1	sp|Q8GY91|APX6_ARATH Putative L-ascorbate peroxidase 6 OS=Arabidopsis thaliana GN=APX6 PE=2 SV=1	3.5	1128-1145	1	GO:0005829(cytosol);GO:0020037(heme binding);GO:0016688(L-ascorbate peroxidase activity);GO:0042744(hydrogen peroxide catabolic process)	ko00053(Ascorbate and aldarate metabolism);ko00480(Glutathione metabolism)
miR7760-p3_1	TRINITY_DN14080_c0_g1	TRINITY_DN14080_c0_g1	-	3.5	782-799	1
miR7760-p3_1	TRINITY_DN15859_c2_g1	TRINITY_DN15859_c2_g1	-	3.5	90-107	1
miR7760-p3_1	TRINITY_DN41790_c0_g1	TRINITY_DN41790_c0_g1	-	3.5	274-291	1
miR7760-p3_1	TRINITY_DN31902_c1_g4	TRINITY_DN31902_c1_g4	-	3.5	102-118	1
miR7760-p3_1	TRINITY_DN27008_c0_g1	TRINITY_DN27008_c0_g1	-	3.5	654-671	1
miR7760-p3_1	TRINITY_DN22224_c0_g1	TRINITY_DN22224_c0_g1	sp|Q93XX5|Y5713_ARATH PI-PLC X domain-containing protein At5g67130 OS=Arabidopsis thaliana GN=At5g67130 PE=1 SV=1	3.5	1645-1662	1	GO:0046658(anchored to plasma membrane);GO:0004629(phospholipase C activity);GO:0035556(intracellular signal transduction);GO:0006629(lipid metabolic process)
miR7760-p3_1	TRINITY_DN27117_c1_g1	TRINITY_DN27117_c1_g1	sp|P42698|DR111_ARATH DNA-damage-repair/toleration protein DRT111, chloroplastic OS=Arabidopsis thaliana GN=DRT111 PE=2 SV=2	3.5	1118-1135	1	GO:0009507(chloroplast);GO:0005634(nucleus);GO:0000166(nucleotide binding);GO:0003723(RNA binding);GO:0006281(DNA repair)
miR7760-p3_1	TRINITY_DN28402_c0_g1	TRINITY_DN28402_c0_g1	-	3.5	1343-1360	1
miR7760-p3_1	TRINITY_DN28491_c0_g1	TRINITY_DN28491_c0_g1	sp|Q8RXH2|NUP85_ARATH Nuclear pore complex protein Nup85 OS=Arabidopsis thaliana GN=NUP85 PE=2 SV=1	3.5	2177-2194	1	GO:0005635(nuclear envelope);GO:0005515(protein binding)
miR7760-p3_1	TRINITY_DN25914_c0_g1	TRINITY_DN25914_c0_g1	sp|Q43870|APS2_ARATH ATP sulfurylase 2 OS=Arabidopsis thaliana GN=APS2 PE=1 SV=1	3.5	1442-1459	1	GO:0009570(chloroplast stroma);GO:0005829(cytosol);GO:0005524(ATP binding);GO:0004781(sulfate adenylyltransferase );GO:0009970(cellular response to sulfate starvation);GO:0000103(sulfate assimilation)	ko00230(Purine metabolism);ko00450(Selenoamino acid metabolism);ko00920(Sulfur metabolism)
miR7760-p3_1	TRINITY_DN22541_c0_g6	TRINITY_DN22541_c0_g6	sp|Q55FI4|NOP58_DICDI Nucleolar protein 58 OS=Dictyostelium discoideum GN=nop58 PE=3 SV=1	3.5	269-286	1	GO:0005730(nucleolus);GO:0042254(ribosome biogenesis)
miR7760-p3_1	TRINITY_DN22541_c0_g1	TRINITY_DN22541_c0_g1	sp|O14967|CLGN_HUMAN Calmegin OS=Homo sapiens GN=CLGN PE=1 SV=1	3.5	275-292	1	GO:0005789(endoplasmic reticulum membrane);GO:0016021(integral to membrane);GO:0051082(unfolded protein binding);GO:0006457(protein folding)
miR7760-p3_1	TRINITY_DN22541_c0_g4	TRINITY_DN22541_c0_g4	sp|A2A4P0|DHX8_MOUSE ATP-dependent RNA helicase DHX8 OS=Mus musculus GN=Dhx8 PE=2 SV=1	3.5	277-294	1	GO:0005524(ATP binding);GO:0008026(ATP-dependent helicase activity);GO:0003723(RNA binding);GO:0006397(mRNA processing);GO:0008380(RNA splicing)
miR7760-p3_1	TRINITY_DN22541_c0_g3	TRINITY_DN22541_c0_g3	sp|Q15696|U2AFM_HUMAN U2 small nuclear ribonucleoprotein auxiliary factor 35 kDa subunit-related protein 2 OS=Homo sapiens GN=ZRSR2 PE=1 SV=2	3.5	279-296	1	GO:0005689(U12-type spliceosomal complex);GO:0000166(nucleotide binding);GO:0030628(pre-mRNA 3'-splice site binding);GO:0005515(protein binding);GO:0008270(zinc ion binding);GO:0000245(spliceosome assembly)
miR7760-p3_1	TRINITY_DN11654_c0_g1	TRINITY_DN11654_c0_g1	-	3.5	926-943	1
miR7760-p3_1	TRINITY_DN22541_c0_g2	TRINITY_DN22541_c0_g2	sp|Q8T6B4|ABCF4_DICDI ABC transporter F family member 4 OS=Dictyostelium discoideum GN=abcF4 PE=3 SV=1	3.5	281-298	1	GO:0005829(cytosol);GO:0005524(ATP binding);GO:0016887(ATPase activity);GO:0006448(regulation of translational elongation);GO:0006810(transport)
miR7760-p3_1	TRINITY_DN31685_c0_g1	TRINITY_DN31685_c0_g1	sp|Q67YI6|ATL65_ARATH RING-H2 finger protein ATL65 OS=Arabidopsis thaliana GN=ATL65 PE=2 SV=2	3.5	1073-1090	1	GO:0016021(integral to membrane);GO:0008270(zinc ion binding)
miR7760-p3_1	TRINITY_DN3971_c0_g2	TRINITY_DN3971_c0_g2	-	3.5	897-914	1
miR7760-p3_1	TRINITY_DN14884_c0_g1	TRINITY_DN14884_c0_g1	sp|Q8VWJ2|WRK28_ARATH Probable WRKY transcription factor 28 OS=Arabidopsis thaliana GN=WRKY28 PE=2 SV=1	3.5	16-33	1	GO:0005634(nucleus);GO:0043565(sequence-specific DNA binding);GO:0003700(sequence-specific DNA binding transcription factor activity)
miR7760-p3_1	TRINITY_DN23828_c0_g1	TRINITY_DN23828_c0_g1	-	3.5	2117-2134	1
miR7760-p3_1	TRINITY_DN22541_c0_g5	TRINITY_DN22541_c0_g5	sp|Q5VTL8|PR38B_HUMAN Pre-mRNA-splicing factor 38B OS=Homo sapiens GN=PRPF38B PE=1 SV=1	3.5	306-323	1
miR7760-p3_1	TRINITY_DN6894_c0_g1	TRINITY_DN6894_c0_g1	sp|Q9LZ56|DOF51_ARATH Dof zinc finger protein DOF5.1 OS=Arabidopsis thaliana GN=DOF5.1 PE=2 SV=1	3.5	622-639	1	GO:0005634(nucleus);GO:0003677(DNA binding);GO:0008270(zinc ion binding);GO:0006355(regulation of transcription, DNA-dependent);GO:0006351(transcription, DNA-dependent)
miR7760-p3_1	TRINITY_DN32163_c3_g1	TRINITY_DN32163_c3_g1	-	3.5	1510-1527	1
miR7760-p3_1	TRINITY_DN22001_c0_g1	TRINITY_DN22001_c0_g1	sp|Q981G1|Y9388_RHILO UPF0261 protein mll9388 OS=Rhizobium loti (strain MAFF303099) GN=mll9388 PE=3 SV=2	3.5	2248-2265	1
miR7760-p3_1	TRINITY_DN10624_c0_g1	TRINITY_DN10624_c0_g1	-	3.5	1113-1130	1
miR7760-p3_1	TRINITY_DN12631_c0_g1	TRINITY_DN12631_c0_g1	sp|Q9ZWA6|MGP_ARATH Zinc finger protein MAGPIE OS=Arabidopsis thaliana GN=MGP PE=1 SV=1	3.5	339-356	1	GO:0005634(nucleus);GO:0003677(DNA binding);GO:0005515(protein binding);GO:0008270(zinc ion binding);GO:0006355(regulation of transcription, DNA-dependent);GO:0006351(transcription, DNA-dependent)
miR7760-p3_1	TRINITY_DN32789_c0_g1	TRINITY_DN32789_c0_g1	sp|P10978|POLX_TOBAC Retrovirus-related Pol polyprotein from transposon TNT 1-94 OS=Nicotiana tabacum PE=2 SV=1	3.5	801-818	1	GO:0004190(aspartic-type endopeptidase activity);GO:0003677(DNA binding);GO:0004519(endonuclease activity);GO:0003964(RNA-directed DNA polymerase activity);GO:0008270(zinc ion binding);GO:0015074(DNA integration)
miR7760-p3_1	TRINITY_DN27051_c0_g1	TRINITY_DN27051_c0_g1	sp|F4JN00|CSTR4_ARATH CMP-sialic acid transporter 4 OS=Arabidopsis thaliana GN=At4g35335 PE=2 SV=1	3.5	1959-1976	1
miR7760-p3_1	TRINITY_DN21920_c1_g15	TRINITY_DN21920_c1_g15	sp|Q9C554|EXPA1_ARATH Expansin-A1 OS=Arabidopsis thaliana GN=EXPA1 PE=2 SV=1	3.5	519-536	1	GO:0005576(extracellular region);GO:0016020(membrane);GO:0009505(plant-type cell wall);GO:0009664(plant-type cell wall organization);GO:0010119(regulation of stomatal movement);GO:0009739(response to gibberellin stimulus);GO:0010114(response to red light);GO:0006949(syncytium formation)
miR7760-p3_1	TRINITY_DN31176_c1_g1	TRINITY_DN31176_c1_g1	-	3.5	612-629	1
miR7760-p3_1	TRINITY_DN24145_c0_g1	TRINITY_DN24145_c0_g1	sp|Q7Y1B6|GAI_SOLLC DELLA protein GAI OS=Solanum lycopersicum GN=GAI PE=2 SV=1	3.5	1437-1454	1	GO:0005634(nucleus);GO:0009740(gibberellic acid mediated signaling pathway);GO:0006355(regulation of transcription, DNA-dependent);GO:0006351(transcription, DNA-dependent)
miR7760-p3_1	TRINITY_DN32657_c1_g3	TRINITY_DN32657_c1_g3	sp|Q9SVH0|PP329_ARATH Pentatricopeptide repeat-containing protein At4g20770 OS=Arabidopsis thaliana GN=PCMP-E35 PE=3 SV=2	3.5	2394-2411	1	GO:0005488(binding)
miR7760-p3_1	TRINITY_DN28426_c1_g2	TRINITY_DN28426_c1_g2	-	3.5	1485-1502	1
miR7760-p3_1	TRINITY_DN11165_c0_g1	TRINITY_DN11165_c0_g1	sp|Q99070|GRP2_SORBI Glycine-rich RNA-binding protein 2 OS=Sorghum bicolor GN=GRP2 PE=2 SV=1	3.5	66-84	1	GO:0000166(nucleotide binding);GO:0003723(RNA binding)
miR7760-p3_1	TRINITY_DN39635_c0_g1	TRINITY_DN39635_c0_g1	-	4	204-221	1
miR7760-p3_1	TRINITY_DN43776_c0_g1	TRINITY_DN43776_c0_g1	-	4	233-250	1
miR7760-p3_1	TRINITY_DN45004_c0_g1	TRINITY_DN45004_c0_g1	-	4	210-227	1
miR7760-p3_1	TRINITY_DN33474_c0_g1	TRINITY_DN33474_c0_g1	-	4	220-237	1
miR7760-p3_1	TRINITY_DN20945_c0_g1	TRINITY_DN20945_c0_g1	-	4	224-241	1
miR7760-p3_1	TRINITY_DN19653_c0_g3	TRINITY_DN19653_c0_g3	-	4	109-126	1
miR7760-p3_1	TRINITY_DN19653_c0_g4	TRINITY_DN19653_c0_g4	-	4	109-126	1
miR7760-p3_1	TRINITY_DN19027_c0_g25	TRINITY_DN19027_c0_g25	-	4	22-39	1
miR7760-p3_1	TRINITY_DN19027_c0_g8	TRINITY_DN19027_c0_g8	-	4	22-39	1
miR7760-p3_1	TRINITY_DN20945_c0_g2	TRINITY_DN20945_c0_g2	-	4	501-518	1
miR7760-p3_1	TRINITY_DN19027_c0_g17	TRINITY_DN19027_c0_g17	-	4	22-39	1
miR7760-p3_1	TRINITY_DN8651_c0_g2	TRINITY_DN8651_c0_g2	-	4	139-156	1
miR7760-p3_1	TRINITY_DN24705_c1_g1	TRINITY_DN24705_c1_g1	sp|Q94C69|CSP3_ARATH Cold shock domain-containing protein 3 OS=Arabidopsis thaliana GN=CSP3 PE=2 SV=1	4	398-415	1
miR7760-p3_1	TRINITY_DN24951_c0_g1	TRINITY_DN24951_c0_g1	sp|Q7VRP3|RL11_BLOFL 50S ribosomal protein L11 OS=Blochmannia floridanus GN=rplK PE=3 SV=1	4	422-439	1	GO:0005840(ribosome);GO:0019843(rRNA binding);GO:0003735(structural constituent of ribosome);GO:0006412(translation)
miR7760-p3_1	TRINITY_DN19027_c0_g11	TRINITY_DN19027_c0_g11	-	4	22-39	1
miR7760-p3_1	TRINITY_DN24851_c2_g1	TRINITY_DN24851_c2_g1	sp|Q42896|SCRK2_SOLLC Fructokinase-2 OS=Solanum lycopersicum GN=FRK2 PE=1 SV=2	4	669-686	1	GO:0005524(ATP binding);GO:0008865(fructokinase activity);GO:0004747(ribokinase activity);GO:0006014(D-ribose metabolic process)	ko00051(Fructose and mannose metabolism);ko00500(Starch and sucrose metabolism);ko00520(Amino sugar and nucleotide sugar metabolism)
miR7760-p3_1	TRINITY_DN19027_c0_g29	TRINITY_DN19027_c0_g29	-	4	22-39	1
miR7760-p3_1	TRINITY_DN19027_c0_g3	TRINITY_DN19027_c0_g3	-	4	22-39	1
miR7760-p3_1	TRINITY_DN19027_c0_g26	TRINITY_DN19027_c0_g26	-	4	22-39	1
miR7760-p3_1	TRINITY_DN19027_c0_g21	TRINITY_DN19027_c0_g21	-	4	22-39	1
miR7760-p3_1	TRINITY_DN19027_c0_g13	TRINITY_DN19027_c0_g13	sp|Q7G6K7|FH3_ORYSJ Formin-like protein 3 OS=Oryza sativa subsp. japonica GN=FH3 PE=2 SV=2	4	22-39	1	GO:0003779(actin binding);GO:0004721(phosphoprotein phosphatase activity);GO:0030036(actin cytoskeleton organization)
miR7760-p3_1	TRINITY_DN19027_c0_g15	TRINITY_DN19027_c0_g15	-	4	22-39	1
miR7760-p3_1	TRINITY_DN20087_c0_g1	TRINITY_DN20087_c0_g1	-	4	169-186	1
miR7760-p3_1	TRINITY_DN19027_c0_g18	TRINITY_DN19027_c0_g18	-	4	22-39	1
miR7760-p3_1	TRINITY_DN19027_c0_g6	TRINITY_DN19027_c0_g6	-	4	22-39	1
miR7760-p3_1	TRINITY_DN19027_c0_g12	TRINITY_DN19027_c0_g12	-	4	22-39	1
miR7760-p3_1	TRINITY_DN19027_c0_g23	TRINITY_DN19027_c0_g23	-	4	22-39	1
miR7760-p3_1	TRINITY_DN19027_c0_g9	TRINITY_DN19027_c0_g9	-	4	22-39	1
miR7760-p3_1	TRINITY_DN19027_c0_g10	TRINITY_DN19027_c0_g10	-	4	22-39	1
miR7760-p3_1	TRINITY_DN19027_c0_g2	TRINITY_DN19027_c0_g2	-	4	22-39	1
miR7760-p3_1	TRINITY_DN19027_c0_g1	TRINITY_DN19027_c0_g1	-	4	22-39	1
miR7760-p3_1	TRINITY_DN4815_c0_g1	TRINITY_DN4815_c0_g1	-	4	156-173	1
miR7760-p3_1	TRINITY_DN6797_c0_g1	TRINITY_DN6797_c0_g1	-	4	196-213	1
miR7760-p3_1	TRINITY_DN12139_c0_g3	TRINITY_DN12139_c0_g3	-	4	120-137	1
miR7760-p3_1	TRINITY_DN31958_c0_g1	TRINITY_DN31958_c0_g1	-	4	317-335	1
miR7760-p3_1	TRINITY_DN1316_c0_g1	TRINITY_DN1316_c0_g1	-	4	71-88	1
miR7760-p3_1	TRINITY_DN22868_c0_g4	TRINITY_DN22868_c0_g4	-	4	149-166	1
miR7760-p3_1	TRINITY_DN22868_c0_g14	TRINITY_DN22868_c0_g14	-	4	149-166	1
miR7760-p3_1	TRINITY_DN22868_c0_g6	TRINITY_DN22868_c0_g6	-	4	149-166	1
miR7760-p3_1	TRINITY_DN4815_c0_g2	TRINITY_DN4815_c0_g2	-	4	156-173	1
miR7760-p3_1	TRINITY_DN22868_c0_g1	TRINITY_DN22868_c0_g1	-	4	149-166	1
miR7760-p3_1	TRINITY_DN22868_c0_g5	TRINITY_DN22868_c0_g5	-	4	149-166	1
miR7760-p3_1	TRINITY_DN22868_c0_g3	TRINITY_DN22868_c0_g3	-	4	149-166	1
miR7760-p3_1	TRINITY_DN22868_c0_g11	TRINITY_DN22868_c0_g11	-	4	149-166	1
miR7760-p3_1	TRINITY_DN22868_c0_g10	TRINITY_DN22868_c0_g10	-	4	149-166	1
miR7760-p3_1	TRINITY_DN22868_c0_g9	TRINITY_DN22868_c0_g9	-	4	149-166	1
miR7760-p3_1	TRINITY_DN22868_c0_g12	TRINITY_DN22868_c0_g12	-	4	149-166	1
miR7760-p3_1	TRINITY_DN22868_c0_g13	TRINITY_DN22868_c0_g13	-	4	149-166	1
miR7760-p3_1	TRINITY_DN22868_c0_g7	TRINITY_DN22868_c0_g7	-	4	149-166	1
miR7760-p3_1	TRINITY_DN22868_c0_g8	TRINITY_DN22868_c0_g8	-	4	149-166	1
miR7760-p3_1	TRINITY_DN22868_c0_g2	TRINITY_DN22868_c0_g2	-	4	149-166	1
miR7760-p3_1	TRINITY_DN26021_c1_g1	TRINITY_DN26021_c1_g1	sp|P59226|H32_ARATH Histone H3.2 OS=Arabidopsis thaliana GN=HTR2 PE=1 SV=2	4	301-318	1	GO:0000786(nucleosome);GO:0005634(nucleus);GO:0003677(DNA binding);GO:0005515(protein binding);GO:0006334(nucleosome assembly)
miR7760-p3_1	TRINITY_DN3389_c0_g1	TRINITY_DN3389_c0_g1	-	4	133-150	1
miR7760-p3_1	TRINITY_DN23594_c0_g1	TRINITY_DN23594_c0_g1	-	4	1052-1069	1
miR7760-p3_1	TRINITY_DN44988_c0_g1	TRINITY_DN44988_c0_g1	-	4	42-59	1
miR7760-p3_1	TRINITY_DN42160_c0_g1	TRINITY_DN42160_c0_g1	-	4	137-154	1
miR7760-p3_1	TRINITY_DN8244_c0_g1	TRINITY_DN8244_c0_g1	-	4	212-229	1
miR7760-p3_1	TRINITY_DN856_c0_g1	TRINITY_DN856_c0_g1	-	4	424-441	1
miR7760-p3_1	TRINITY_DN44988_c0_g2	TRINITY_DN44988_c0_g2	-	4	63-80	1
miR7760-p3_1	TRINITY_DN19027_c0_g5	TRINITY_DN19027_c0_g5	-	4	22-39	1
miR7760-p3_1	TRINITY_DN19027_c0_g14	TRINITY_DN19027_c0_g14	-	4	22-39	1
miR7760-p3_1	TRINITY_DN19027_c0_g24	TRINITY_DN19027_c0_g24	-	4	22-39	1
miR7760-p3_1	TRINITY_DN19027_c0_g7	TRINITY_DN19027_c0_g7	-	4	22-39	1
miR7760-p3_1	TRINITY_DN19027_c0_g16	TRINITY_DN19027_c0_g16	-	4	22-39	1
miR7760-p3_1	TRINITY_DN36177_c0_g1	TRINITY_DN36177_c0_g1	-	4	74-91	1
miR7760-p3_1	TRINITY_DN19151_c0_g3	TRINITY_DN19151_c0_g3	-	4	176-192	1
miR7760-p3_1	TRINITY_DN12363_c0_g1	TRINITY_DN12363_c0_g1	sp|Q9C660|PEK10_ARATH Proline-rich receptor-like protein kinase PERK10 OS=Arabidopsis thaliana GN=PERK10 PE=1 SV=2	4	169-186	1	GO:0016021(integral to membrane);GO:0005886(plasma membrane);GO:0005524(ATP binding);GO:0004674(protein serine/threonine kinase activity)
miR7760-p3_1	TRINITY_DN19151_c0_g1	TRINITY_DN19151_c0_g1	-	4	176-192	1
miR7760-p3_1	TRINITY_DN19151_c0_g2	TRINITY_DN19151_c0_g2	-	4	176-192	1
miR7760-p3_1	TRINITY_DN493_c0_g1	TRINITY_DN493_c0_g1	-	4	239-256	1
miR7760-p3_1	TRINITY_DN38543_c0_g1	TRINITY_DN38543_c0_g1	-	4	163-180	1
miR7760-p3_1	TRINITY_DN19839_c0_g1	TRINITY_DN19839_c0_g1	sp|Q94JU2|WTR18_ARATH WAT1-related protein At3g28050 OS=Arabidopsis thaliana GN=At3g28050 PE=2 SV=1	4	1138-1156	1
miR7760-p3_1	TRINITY_DN34483_c0_g1	TRINITY_DN34483_c0_g1	sp|Q9STF3|PP265_ARATH Pentatricopeptide repeat-containing protein At3g46790, chloroplastic OS=Arabidopsis thaliana GN=CRR2 PE=2 SV=1	4	34-51	1	GO:0009507(chloroplast);GO:0005488(binding);GO:0031425(chloroplast RNA processing);GO:0031426(polycistronic mRNA processing)
miR7760-p3_1	TRINITY_DN16722_c1_g1	TRINITY_DN16722_c1_g1	sp|Q9LV09|BOB1_ARATH Protein BOBBER 1 OS=Arabidopsis thaliana GN=BOB1 PE=1 SV=1	4	1029-1046	1
miR7760-p3_1	TRINITY_DN36892_c0_g1	TRINITY_DN36892_c0_g1	sp|Q9VSH4|CPSF6_DROME Cleavage and polyadenylation specificity factor subunit CG7185 OS=Drosophila melanogaster GN=CG7185 PE=1 SV=2	4	165-182	1	GO:0005634(nucleus);GO:0000166(nucleotide binding);GO:0003723(RNA binding);GO:0006397(mRNA processing);GO:0000381(regulation of alternative nuclear mRNA splicing, via spliceosome)
miR7760-p3_1	TRINITY_DN20855_c0_g1	TRINITY_DN20855_c0_g1	sp|P10978|POLX_TOBAC Retrovirus-related Pol polyprotein from transposon TNT 1-94 OS=Nicotiana tabacum PE=2 SV=1	4	105-121	1	GO:0004190(aspartic-type endopeptidase activity);GO:0003677(DNA binding);GO:0004519(endonuclease activity);GO:0003964(RNA-directed DNA polymerase activity);GO:0008270(zinc ion binding);GO:0015074(DNA integration)
miR7760-p3_1	TRINITY_DN26496_c0_g1	TRINITY_DN26496_c0_g1	sp|Q9LK03|PERK2_ARATH Proline-rich receptor-like protein kinase PERK2 OS=Arabidopsis thaliana GN=PERK2 PE=2 SV=3	4	354-371	1	GO:0016021(integral to membrane);GO:0005886(plasma membrane);GO:0005524(ATP binding);GO:0004674(protein serine/threonine kinase activity);GO:0004872(receptor activity)
miR7760-p3_1	TRINITY_DN27522_c0_g1	TRINITY_DN27522_c0_g1	-	4	640-657	1
miR7760-p3_1	TRINITY_DN27914_c2_g1	TRINITY_DN27914_c2_g1	sp|Q9S7R7|Y3903_ARATH BTB/POZ domain-containing protein At3g09030 OS=Arabidopsis thaliana GN=At3g09030 PE=2 SV=1	4	177-194	1	GO:0008076(voltage-gated potassium channel complex);GO:0005249(voltage-gated potassium channel activity)
miR7760-p3_1	TRINITY_DN31987_c1_g7	TRINITY_DN31987_c1_g7	-	4	91-108	1
miR7760-p3_1	TRINITY_DN39580_c0_g1	TRINITY_DN39580_c0_g1	-	4	538-555	1
miR7760-p3_1	TRINITY_DN15381_c0_g1	TRINITY_DN15381_c0_g1	-	4	68-85	1
miR7760-p3_1	TRINITY_DN31987_c1_g9	TRINITY_DN31987_c1_g9	-	4	98-115	1
miR7760-p3_1	TRINITY_DN36344_c0_g1	TRINITY_DN36344_c0_g1	-	4	50-67	1
miR7760-p3_1	TRINITY_DN21846_c0_g1	TRINITY_DN21846_c0_g1	-	4	202-219	1
miR7760-p3_1	TRINITY_DN6298_c0_g2	TRINITY_DN6298_c0_g2	sp|Q9SX31|PERK9_ARATH Proline-rich receptor-like protein kinase PERK9 OS=Arabidopsis thaliana GN=PERK9 PE=2 SV=1	4	167-184	1	GO:0016021(integral to membrane);GO:0005886(plasma membrane);GO:0005524(ATP binding);GO:0004674(protein serine/threonine kinase activity)
miR7760-p3_1	TRINITY_DN31987_c1_g1	TRINITY_DN31987_c1_g1	-	4	153-170	1
miR7760-p3_1	TRINITY_DN31987_c1_g6	TRINITY_DN31987_c1_g6	-	4	153-170	1
miR7760-p3_1	TRINITY_DN31987_c1_g12	TRINITY_DN31987_c1_g12	-	4	136-153	1
miR7760-p3_1	TRINITY_DN31987_c1_g3	TRINITY_DN31987_c1_g3	-	4	136-153	1
miR7760-p3_1	TRINITY_DN31249_c0_g1	TRINITY_DN31249_c0_g1	sp|Q9SUP7|HMGB6_ARATH High mobility group B protein 6 OS=Arabidopsis thaliana GN=HMGB6 PE=2 SV=1	4	1598-1615	1	GO:0005634(nucleus);GO:0003677(DNA binding)
miR7760-p3_1	TRINITY_DN1534_c0_g1	TRINITY_DN1534_c0_g1	-	4	337-354	1
miR7760-p3_1	TRINITY_DN17578_c0_g1	TRINITY_DN17578_c0_g1	sp|Q6K9C3|RZP23_ORYSJ Serine/arginine-rich splicing factor RSZ23 OS=Oryza sativa subsp. japonica GN=RSZ23 PE=2 SV=1	4	113-130	1
miR7760-p3_1	TRINITY_DN23615_c0_g4	TRINITY_DN23615_c0_g4	-	4	44-61	1
miR7760-p3_1	TRINITY_DN24165_c0_g1	TRINITY_DN24165_c0_g1	-	4	1432-1449	1
miR7760-p3_1	TRINITY_DN23615_c0_g5	TRINITY_DN23615_c0_g5	sp|Q9SX31|PERK9_ARATH Proline-rich receptor-like protein kinase PERK9 OS=Arabidopsis thaliana GN=PERK9 PE=2 SV=1	4	44-61	1	GO:0016021(integral to membrane);GO:0005886(plasma membrane);GO:0005524(ATP binding);GO:0004674(protein serine/threonine kinase activity)
miR7760-p3_1	TRINITY_DN16351_c0_g1	TRINITY_DN16351_c0_g1	-	4	292-309	1
miR7760-p3_1	TRINITY_DN25017_c0_g2	TRINITY_DN25017_c0_g2	-	4	775-792	1
miR7760-p3_1	TRINITY_DN17905_c0_g1	TRINITY_DN17905_c0_g1	-	4	52-69	1
miR7760-p3_1	TRINITY_DN493_c0_g2	TRINITY_DN493_c0_g2	-	4	561-578	1
miR7760-p3_1	TRINITY_DN29826_c0_g1	TRINITY_DN29826_c0_g1	sp|P93471|COP1_PEA E3 ubiquitin-protein ligase COP1 OS=Pisum sativum GN=COP1 PE=2 SV=1	4	855-872	1	GO:0005737(cytoplasm);GO:0005634(nucleus);GO:0016874(ligase activity);GO:0008270(zinc ion binding);GO:0009585(red, far-red light phototransduction)	ko04115(p53 signaling pathway);ko04120(Ubiquitin mediated proteolysis)
miR7760-p3_1	TRINITY_DN26840_c0_g2	TRINITY_DN26840_c0_g2	sp|O75037|KI21B_HUMAN Kinesin-like protein KIF21B OS=Homo sapiens GN=KIF21B PE=1 SV=2	4	702-719	1	GO:0005737(cytoplasm);GO:0005874(microtubule);GO:0005524(ATP binding);GO:0003777(microtubule motor activity);GO:0007018(microtubule-based movement)
miR7760-p3_1	TRINITY_DN23085_c4_g1	TRINITY_DN23085_c4_g1	sp|Q9LK03|PERK2_ARATH Proline-rich receptor-like protein kinase PERK2 OS=Arabidopsis thaliana GN=PERK2 PE=2 SV=3	4	580-597	1	GO:0016021(integral to membrane);GO:0005886(plasma membrane);GO:0005524(ATP binding);GO:0004674(protein serine/threonine kinase activity);GO:0004872(receptor activity)	ko04622(RIG-I-like receptor signaling pathway)
miR7760-p3_1	TRINITY_DN26075_c0_g1	TRINITY_DN26075_c0_g1	sp|Q8W034|RNP1_ARATH Heterogeneous nuclear ribonucleoprotein 1 OS=Arabidopsis thaliana GN=RNP1 PE=1 SV=1	4	594-611	1
miR7760-p3_1	TRINITY_DN29906_c0_g1	TRINITY_DN29906_c0_g1	-	4	979-996	1
miR7760-p3_1	TRINITY_DN34912_c0_g1	TRINITY_DN34912_c0_g1	-	4	429-446	1
miR7760-p3_1	TRINITY_DN24728_c0_g1	TRINITY_DN24728_c0_g1	sp|Q9M2U1|DOF36_ARATH Dof zinc finger protein DOF3.6 OS=Arabidopsis thaliana GN=DOF3.6 PE=1 SV=2	4	1213-1230	1	GO:0005634(nucleus);GO:0003677(DNA binding);GO:0003700(sequence-specific DNA binding transcription factor activity);GO:0008270(zinc ion binding);GO:0009640(photomorphogenesis);GO:0045893(positive regulation of transcription, DNA-dependent)
miR7760-p3_1	TRINITY_DN31987_c1_g11	TRINITY_DN31987_c1_g11	-	4	243-260	1
miR7760-p3_1	TRINITY_DN30835_c0_g1	TRINITY_DN30835_c0_g1	-	4	3302-3319	1
miR7760-p3_1	TRINITY_DN6946_c0_g1	TRINITY_DN6946_c0_g1	sp|Q84UQ3|C3H56_ORYSJ Zinc finger CCCH domain-containing protein 56 OS=Oryza sativa subsp. japonica GN=Os08g0159800 PE=2 SV=1	4	802-819	1	GO:0003677(DNA binding);GO:0008270(zinc ion binding)
miR7760-p3_1	TRINITY_DN23819_c0_g2	TRINITY_DN23819_c0_g2	sp|Q9FGF8|ABR1_ARATH Ethylene-responsive transcription factor ABR1 OS=Arabidopsis thaliana GN=ABR1 PE=2 SV=1	4	1013-1030	1	GO:0005634(nucleus);GO:0003677(DNA binding);GO:0003700(sequence-specific DNA binding transcription factor activity);GO:0009738(abscisic acid mediated signaling pathway);GO:0050832(defense response to fungus);GO:0009873(ethylene mediated signaling pathway);GO:0009788(negative regulation of abscisic acid mediated signaling pathway);GO:0009749(response to glucose stimulus);GO:0006970(response to osm…
miR7760-p3_1	TRINITY_DN31009_c0_g1	TRINITY_DN31009_c0_g1	sp|Q8L7Y8|KN12B_ARATH Kinesin-like protein KIN12B OS=Arabidopsis thaliana GN=KIN12B PE=1 SV=1	4	823-840	1
miR7760-p3_1	TRINITY_DN25966_c1_g1	TRINITY_DN25966_c1_g1	sp|Q9FY48|KEG_ARATH E3 ubiquitin-protein ligase KEG OS=Arabidopsis thaliana GN=KEG PE=1 SV=2	4	4927-4944	1	GO:0005769(early endosome);GO:0005802(trans-Golgi network);GO:0005524(ATP binding);GO:0043621(protein self-association);GO:0004674(protein serine/threonine kinase activity);GO:0004842(ubiquitin-protein ligase activity);GO:0008270(zinc ion binding);GO:0009738(abscisic acid mediated signaling pathway);GO:0006952(defense response);GO:0048589(developmental growth);GO:0009788(negative regulation of ab…
miR7760-p3_1	TRINITY_DN49581_c0_g1	TRINITY_DN49581_c0_g1	-	4	132-149	1
miR7760-p3_1	TRINITY_DN26075_c0_g2	TRINITY_DN26075_c0_g2	sp|Q8W034|RNP1_ARATH Heterogeneous nuclear ribonucleoprotein 1 OS=Arabidopsis thaliana GN=RNP1 PE=1 SV=1	4	594-611	1
miR7760-p3_1	TRINITY_DN3728_c0_g1	TRINITY_DN3728_c0_g1	sp|P93031|GMD2_ARATH GDP-mannose 4,6 dehydratase 2 OS=Arabidopsis thaliana GN=MUR1 PE=1 SV=3	4	555-572	1	GO:0005829(cytosol);GO:0050662(coenzyme binding);GO:0008446(GDP-mannose 4,6-dehydratase activity);GO:0005525(GTP binding);GO:0042351('de novo' GDP-L-fucose biosynthetic process);GO:0019673(GDP-mannose metabolic process);GO:0009826(unidimensional cell growth)	ko00051(Fructose and mannose metabolism);ko00520(Amino sugar and nucleotide sugar metabolism)
miR7760-p3_1	TRINITY_DN28556_c0_g1	TRINITY_DN28556_c0_g1	sp|Q8BTI8|SRRM2_MOUSE Serine/arginine repetitive matrix protein 2 OS=Mus musculus GN=Srrm2 PE=1 SV=3	4	4426-4443	1	GO:0016607(nuclear speck);GO:0005681(spliceosomal complex);GO:0006397(mRNA processing);GO:0008380(RNA splicing)
miR7760-p3_1	TRINITY_DN26465_c0_g1	TRINITY_DN26465_c0_g1	-	4	571-589	1
miR7760-p3_1	TRINITY_DN22868_c0_g15	TRINITY_DN22868_c0_g15	sp|Q9SH58|MAKR2_ARATH Probable membrane-associated kinase regulator 2 OS=Arabidopsis thaliana GN=MAKR2 PE=2 SV=1	4	1739-1756	1	GO:0005886(plasma membrane)
miR7760-p3_1	TRINITY_DN26867_c0_g1	TRINITY_DN26867_c0_g1	sp|Q944C1|PLCD4_ARATH Phosphoinositide phospholipase C 4 OS=Arabidopsis thaliana GN=PLC4 PE=2 SV=2	4	1670-1687	1	GO:0005829(cytosol);GO:0005886(plasma membrane);GO:0005509(calcium ion binding);GO:0004435(phosphatidylinositol phospholipase C activity);GO:0004871(signal transducer activity);GO:0035556(intracellular signal transduction);GO:0016042(lipid catabolic process)	ko00562(Inositol phosphate metabolism);ko04020(Calcium signaling pathway);ko04070(Phosphatidylinositol signaling system)
miR7760-p3_1	TRINITY_DN24435_c0_g1	TRINITY_DN24435_c0_g1	sp|Q9LY84|GDL76_ARATH GDSL esterase/lipase At5g14450 OS=Arabidopsis thaliana GN=At5g14450 PE=2 SV=1	4	642-659	1	GO:0005576(extracellular region);GO:0009505(plant-type cell wall);GO:0009506(plasmodesma);GO:0016788(hydrolase activity, acting on ester bonds);GO:0016042(lipid catabolic process)
miR7760-p3_1	TRINITY_DN17439_c0_g1	TRINITY_DN17439_c0_g1	sp|Q8IZQ5|SELH_HUMAN Selenoprotein H OS=Homo sapiens GN=SELH PE=1 SV=2	4	662-679	1	GO:0008430(selenium binding);GO:0045454(cell redox homeostasis)
miR7760-p3_1	TRINITY_DN25334_c1_g1	TRINITY_DN25334_c1_g1	-	4	751-768	1
miR7760-p3_1	TRINITY_DN32592_c5_g2	TRINITY_DN32592_c5_g2	sp|P23881|TCEA3_MOUSE Transcription elongation factor A protein 3 OS=Mus musculus GN=Tcea3 PE=1 SV=3	4	1794-1811	1	GO:0005634(nucleus);GO:0003677(DNA binding);GO:0003746(translation elongation factor activity);GO:0008270(zinc ion binding);GO:0032784(regulation of transcription elongation, DNA-dependent);GO:0006357(regulation of transcription from RNA polymerase II promoter);GO:0006354(transcription elongation, DNA-dependent)
miR7760-p3_1	TRINITY_DN19383_c0_g1	TRINITY_DN19383_c0_g1	sp|Q9SX31|PERK9_ARATH Proline-rich receptor-like protein kinase PERK9 OS=Arabidopsis thaliana GN=PERK9 PE=2 SV=1	4	346-364	1	GO:0016021(integral to membrane);GO:0005886(plasma membrane);GO:0005524(ATP binding);GO:0004674(protein serine/threonine kinase activity)
miR7760-p3_1	TRINITY_DN32784_c1_g2	TRINITY_DN32784_c1_g2	-	4	824-840	1
miR7760-p3_1	TRINITY_DN39564_c0_g1	TRINITY_DN39564_c0_g1	sp|Q9FNR1|RBG3_ARATH Glycine-rich RNA-binding protein 3, mitochondrial OS=Arabidopsis thaliana GN=RBG3 PE=2 SV=1	4	756-773	1
miR7760-p3_1	TRINITY_DN49778_c1_g1	TRINITY_DN49778_c1_g1	sp|Q54GQ1|MTMR_DICDI Myotubularin-related protein DDB_G0290005 OS=Dictyostelium discoideum GN=DDB_G0290005 PE=3 SV=2	4	493-510	1	GO:0005737(cytoplasm);GO:0016791(phosphatase activity)
miR7760-p3_1	TRINITY_DN19778_c1_g1	TRINITY_DN19778_c1_g1	sp|Q07100|PP2A4_ARATH Serine/threonine-protein phosphatase PP2A-4 catalytic subunit OS=Arabidopsis thaliana GN=PP2A4 PE=2 SV=2	4	390-407	1	GO:0005737(cytoplasm);GO:0005634(nucleus);GO:0005886(plasma membrane);GO:0046872(metal ion binding);GO:0004721(phosphoprotein phosphatase activity)	ko04114(Oocyte meiosis);ko04310(Wnt signaling pathway);ko04350(TGF-beta signaling pathway);ko04530(Tight junction);ko04730(Long-term depression)
miR7760-p3_1	TRINITY_DN32312_c0_g1	TRINITY_DN32312_c0_g1	sp|Q8H0T4|UPL2_ARATH E3 ubiquitin-protein ligase UPL2 OS=Arabidopsis thaliana GN=UPL2 PE=1 SV=3	4	13015-13032	1	GO:0005829(cytosol);GO:0005739(mitochondrion);GO:0005634(nucleus);GO:0016881(acid-amino acid ligase activity);GO:0005488(binding);GO:0006464(protein modification process)	ko04120(Ubiquitin mediated proteolysis)
miR7760-p3_1	TRINITY_DN19248_c0_g1	TRINITY_DN19248_c0_g1	sp|O80982|HSFA2_ARATH Heat stress transcription factor A-2 OS=Arabidopsis thaliana GN=HSFA2 PE=1 SV=1	4	2307-2324	1	GO:0005737(cytoplasm);GO:0005634(nucleus);GO:0005515(protein binding);GO:0043565(sequence-specific DNA binding);GO:0003700(sequence-specific DNA binding transcription factor activity);GO:0034605(cellular response to heat);GO:0071456(cellular response to hypoxia);GO:0034620(cellular response to unfolded protein);GO:0010286(heat acclimation);GO:0045893(positive regulation of transcription, DNA-depe…
miR7760-p3_1	TRINITY_DN26104_c1_g1	TRINITY_DN26104_c1_g1	sp|Q9FPR3|EDR1_ARATH Serine/threonine-protein kinase EDR1 OS=Arabidopsis thaliana GN=EDR1 PE=1 SV=1	4	2234-2251	1		ko04010(MAPK signaling pathway);ko04530(Tight junction)
miR7760-p3_1	TRINITY_DN23766_c1_g1	TRINITY_DN23766_c1_g1	sp|Q9FKJ0|FK132_ARATH F-box/kelch-repeat protein At5g60570 OS=Arabidopsis thaliana GN=At5g60570 PE=2 SV=1	4	9-26	1	GO:0005634(nucleus)
miR7760-p3_1	TRINITY_DN2369_c0_g1	TRINITY_DN2369_c0_g1	-	4	105-122	1
miR7760-p3_1	TRINITY_DN25986_c1_g1	TRINITY_DN25986_c1_g1	sp|O65685|BLH6_ARATH BEL1-like homeodomain protein 6 OS=Arabidopsis thaliana GN=BLH6 PE=2 SV=1	4	549-566	1	GO:0005634(nucleus);GO:0043565(sequence-specific DNA binding);GO:0003700(sequence-specific DNA binding transcription factor activity)
miR7760-p3_1	TRINITY_DN19488_c0_g2	TRINITY_DN19488_c0_g2	sp|Q8W4R3|RH30_ARATH DEAD-box ATP-dependent RNA helicase 30 OS=Arabidopsis thaliana GN=RH30 PE=2 SV=2	4	2728-2745	1	GO:0005634(nucleus);GO:0005524(ATP binding);GO:0008026(ATP-dependent helicase activity);GO:0003723(RNA binding);GO:0000184(nuclear-transcribed mRNA catabolic process, nonsense-mediated decay);GO:0006364(rRNA processing)
miR7760-p3_1	TRINITY_DN26325_c0_g1	TRINITY_DN26325_c0_g1	sp|P12470|CB25_NICPL Chlorophyll a-b binding protein E, chloroplastic OS=Nicotiana plumbaginifolia GN=CABE PE=3 SV=1	4	1268-1285	1	GO:0009535(chloroplast thylakoid membrane);GO:0016021(integral to membrane);GO:0009522(photosystem I);GO:0009523(photosystem II);GO:0016168(chlorophyll binding);GO:0046872(metal ion binding);GO:0009765(photosynthesis, light harvesting);GO:0018298(protein-chromophore linkage)	ko00196(Photosynthesis - antenna proteins)
miR7760-p3_1	TRINITY_DN26946_c7_g1	TRINITY_DN26946_c7_g1	sp|Q9SPL4|AMP22_MACIN Vicilin-like antimicrobial peptides 2-2 OS=Macadamia integrifolia GN=AMP2-2 PE=2 SV=1	4	1800-1817	1	GO:0005576(extracellular region);GO:0045735(nutrient reservoir activity);GO:0042742(defense response to bacterium);GO:0050832(defense response to fungus);GO:0031640(killing of cells of other organism)
miR7760-p3_1	TRINITY_DN50490_c0_g1	TRINITY_DN50490_c0_g1	sp|Q9FHW7|SKP1B_ARATH SKP1-like protein 1B OS=Arabidopsis thaliana GN=SKP1B PE=1 SV=1	4	276-293	1	GO:0005634(nucleus);GO:0005515(protein binding);GO:0009734(auxin mediated signaling pathway);GO:0007059(chromosome segregation);GO:0009793(embryo development ending in seed dormancy);GO:0009873(ethylene mediated signaling pathway);GO:0044419(interspecies interaction between organisms);GO:0006511(ubiquitin-dependent protein catabolic process)	ko04110(Cell cycle);ko04114(Oocyte meiosis);ko04120(Ubiquitin mediated proteolysis);ko04310(Wnt signaling pathway);ko04350(TGF-beta signaling pathway)
miR7760-p3_1	TRINITY_DN24621_c1_g1	TRINITY_DN24621_c1_g1	sp|Q92804|RBP56_HUMAN TATA-binding protein-associated factor 2N OS=Homo sapiens GN=TAF15 PE=1 SV=1	4	2482-2499	1	GO:0005737(cytoplasm);GO:0005634(nucleus);GO:0003677(DNA binding);GO:0000166(nucleotide binding);GO:0005515(protein binding);GO:0003723(RNA binding);GO:0008270(zinc ion binding);GO:0045893(positive regulation of transcription, DNA-dependent)
miR7760-p3_1	TRINITY_DN29925_c0_g1	TRINITY_DN29925_c0_g1	-	4	947-964	1
miR7760-p3_1	TRINITY_DN31134_c0_g1	TRINITY_DN31134_c0_g1	sp|Q10LN5|SWT16_ORYSJ Bidirectional sugar transporter SWEET16 OS=Oryza sativa subsp. japonica GN=SWEET16 PE=2 SV=1	4	373-390	1	GO:0005887(integral to plasma membrane);GO:0051119(sugar transmembrane transporter activity)
miR7760-p3_1	TRINITY_DN25725_c0_g1	TRINITY_DN25725_c0_g1	-	4	682-699	1
miR7760-p3_1	TRINITY_DN10003_c0_g1	TRINITY_DN10003_c0_g1	-	4	260-277	1
miR7760-p3_1	TRINITY_DN27325_c1_g1	TRINITY_DN27325_c1_g1	sp|Q40477|ERF4_TOBAC Ethylene-responsive transcription factor 4 OS=Nicotiana tabacum GN=ERF4 PE=1 SV=1	4	636-653	1	GO:0005634(nucleus);GO:0003677(DNA binding);GO:0003700(sequence-specific DNA binding transcription factor activity);GO:0006952(defense response);GO:0009873(ethylene mediated signaling pathway)
miR7760-p3_1	TRINITY_DN31987_c1_g2	TRINITY_DN31987_c1_g2	-	4	48-65	1
miR7760-p3_1	TRINITY_DN3966_c0_g1	TRINITY_DN3966_c0_g1	sp|Q9LK03|PERK2_ARATH Proline-rich receptor-like protein kinase PERK2 OS=Arabidopsis thaliana GN=PERK2 PE=2 SV=3	4	529-546	1	GO:0016021(integral to membrane);GO:0005886(plasma membrane);GO:0005524(ATP binding);GO:0004674(protein serine/threonine kinase activity);GO:0004872(receptor activity)
miR7760-p3_1	TRINITY_DN25459_c0_g1	TRINITY_DN25459_c0_g1	sp|P43299|PROL_ARATH Protein PROLIFERA OS=Arabidopsis thaliana GN=PRL PE=1 SV=2	4	1360-1377	1	GO:0005737(cytoplasm);GO:0005634(nucleus);GO:0005524(ATP binding);GO:0003677(DNA binding);GO:0017111(nucleoside-triphosphatase activity);GO:0005515(protein binding);GO:0007049(cell cycle);GO:0006268(DNA unwinding involved in replication);GO:0006270(DNA-dependent DNA replication initiation);GO:0006355(regulation of transcription, DNA-dependent);GO:0010182(sugar mediated signaling pathway);GO:00063…	ko03030(DNA replication);ko04110(Cell cycle)
miR7760-p3_1	TRINITY_DN32019_c2_g1	TRINITY_DN32019_c2_g1	sp|O81127|RZP21_ARATH Serine/arginine-rich splicing factor RSZ21 OS=Arabidopsis thaliana GN=RSZ21 PE=1 SV=1	4	1704-1721	1
miR7760-p3_1	TRINITY_DN19931_c0_g1	TRINITY_DN19931_c0_g1	sp|O65023|EAAC_ARATH Probable envelope ADP,ATP carrier protein, chloroplastic OS=Arabidopsis thaliana GN=EAAC PE=2 SV=2	4	1469-1486	1	GO:0031969(chloroplast membrane);GO:0016021(integral to membrane);GO:0005743(mitochondrial inner membrane);GO:0005488(binding);GO:0009624(response to nematode);GO:0055085(transmembrane transport)
miR7760-p3_1	TRINITY_DN49425_c0_g1	TRINITY_DN49425_c0_g1	sp|Q3E936|MAKR1_ARATH Probable membrane-associated kinase regulator 1 OS=Arabidopsis thaliana GN=MAKR1 PE=1 SV=1	4	342-359	1	GO:0005886(plasma membrane);GO:0019210(kinase inhibitor activity);GO:0009742(brassinosteroid mediated signaling pathway)
miR7760-p3_1	TRINITY_DN10108_c0_g1	TRINITY_DN10108_c0_g1	sp|Q9M0R0|BH081_ARATH Transcription factor bHLH81 OS=Arabidopsis thaliana GN=BHLH81 PE=2 SV=1	4	957-974	1	GO:0005634(nucleus);GO:0003677(DNA binding);GO:0006355(regulation of transcription, DNA-dependent);GO:0006351(transcription, DNA-dependent)
miR7760-p3_1	TRINITY_DN10780_c0_g1	TRINITY_DN10780_c0_g1	sp|Q9SZ83|Y4967_ARATH Uncharacterized oxidoreductase At4g09670 OS=Arabidopsis thaliana GN=At4g09670 PE=1 SV=1	4	871-888	1	GO:0005829(cytosol);GO:0005488(binding);GO:0016491(oxidoreductase activity)
miR7760-p3_1	TRINITY_DN20386_c0_g1	TRINITY_DN20386_c0_g1	sp|Q9ZVN4|Y1500_ARATH Probable tyrosine-protein phosphatase At1g05000 OS=Arabidopsis thaliana GN=At1g05000 PE=1 SV=1	4	1592-1609	1	GO:0004725(protein tyrosine phosphatase activity)
miR7760-p3_1	TRINITY_DN30073_c0_g1	TRINITY_DN30073_c0_g1	-	4	411-428	1
miR7760-p3_1	TRINITY_DN26129_c1_g1	TRINITY_DN26129_c1_g1	sp|Q9LYJ9|RH46_ARATH DEAD-box ATP-dependent RNA helicase 46 OS=Arabidopsis thaliana GN=RH46 PE=2 SV=2	4	904-921	1	GO:0005524(ATP binding);GO:0008026(ATP-dependent helicase activity);GO:0003723(RNA binding)
miR7760-p3_1	TRINITY_DN21505_c1_g1	TRINITY_DN21505_c1_g1	sp|F4I3B3|RB47A_ARATH Polyadenylate-binding protein RBP47A OS=Arabidopsis thaliana GN=RBP47A PE=2 SV=1	4	1326-1343	1
miR7760-p3_1	TRINITY_DN7223_c0_g1	TRINITY_DN7223_c0_g1	sp|Q9M9V8|CDPKA_ARATH Calcium-dependent protein kinase 10 OS=Arabidopsis thaliana GN=CPK10 PE=1 SV=1	4	312-330	1	GO:0016020(membrane);GO:0005524(ATP binding);GO:0005509(calcium ion binding);GO:0004674(protein serine/threonine kinase activity);GO:0009738(abscisic acid mediated signaling pathway);GO:0046777(protein autophosphorylation)
miR7760-p3_1	TRINITY_DN32249_c0_g1	TRINITY_DN32249_c0_g1	-	4	3159-3176	1
miR7760-p3_1	TRINITY_DN22827_c0_g1	TRINITY_DN22827_c0_g1	sp|Q6AWY4|GRF5_ORYSJ Growth-regulating factor 5 OS=Oryza sativa subsp. japonica GN=GRF5 PE=2 SV=1	4	1236-1253	1
miR7760-p3_1	TRINITY_DN19312_c1_g1	TRINITY_DN19312_c1_g1	sp|O81126|RZP22_ARATH Serine/arginine-rich splicing factor RSZ22 OS=Arabidopsis thaliana GN=RSZ22 PE=1 SV=1	4	1881-1898	1
miR7760-p3_1	TRINITY_DN30305_c0_g1	TRINITY_DN30305_c0_g1	sp|O48809|LRX2_ARATH Leucine-rich repeat extensin-like protein 2 OS=Arabidopsis thaliana GN=LRX2 PE=1 SV=1	4	366-383	1	GO:0005576(extracellular region);GO:0009505(plant-type cell wall);GO:0007047(cellular cell wall organization);GO:0007275(multicellular organismal development)
miR7760-p3_1	TRINITY_DN19566_c1_g1	TRINITY_DN19566_c1_g1	sp|P51831|FABG_BACSU 3-oxoacyl-[acyl-carrier-protein] reductase FabG OS=Bacillus subtilis (strain 168) GN=fabG PE=3 SV=3	4	318-335	1	GO:0004316(3-oxoacyl-[acyl-carrier-protein] reductase );GO:0051287(NAD binding);GO:0006633(fatty acid biosynthetic process)	ko00061(Fatty acid biosynthesis);ko01040(Biosynthesis of unsaturated fatty acids)
miR7760-p3_1	TRINITY_DN13912_c0_g2	TRINITY_DN13912_c0_g2	-	4	384-401	1
miR7760-p3_1	TRINITY_DN32230_c0_g1	TRINITY_DN32230_c0_g1	sp|Q9LF24|LNG1_ARATH Protein LONGIFOLIA 1 OS=Arabidopsis thaliana GN=LNG1 PE=1 SV=1	4	3321-3338	1
miR7760-p3_1	TRINITY_DN26213_c0_g1	TRINITY_DN26213_c0_g1	sp|Q8GYB1|NUD15_ARATH Nudix hydrolase 15, mitochondrial OS=Arabidopsis thaliana GN=NUDT15 PE=1 SV=2	4	1284-1301	1	GO:0005739(mitochondrion);GO:0010945(CoA pyrophosphatase activity);GO:0046872(metal ion binding)
miR7760-p3_1	TRINITY_DN31754_c1_g1	TRINITY_DN31754_c1_g1	-	4	281-298	1
miR7760-p3_1	TRINITY_DN31152_c2_g3	TRINITY_DN31152_c2_g3	sp|P93147|C81E1_GLYEC Isoflavone 2'-hydroxylase OS=Glycyrrhiza echinata GN=CYP81E1 PE=1 SV=2	4	4838-4855	1	GO:0016020(membrane);GO:0009055(electron carrier activity);GO:0020037(heme binding);GO:0033773(isoflavone 2'-hydroxylase activity)	ko00361(gamma-Hexachlorocyclohexane degradation);ko00626(Naphthalene and anthracene degradation);ko00903(Limonene and pinene degradation);ko00945(Stilbenoid,ko diarylheptanoid and gingerol biosynthesis)
miR7760-p3_1	TRINITY_DN27877_c0_g1	TRINITY_DN27877_c0_g1	sp|Q9ZVM9|Y1461_ARATH Probable serine/threonine-protein kinase At1g54610 OS=Arabidopsis thaliana GN=At1g54610 PE=1 SV=1	4	1948-1965	1	GO:0005886(plasma membrane);GO:0005524(ATP binding);GO:0005515(protein binding);GO:0004674(protein serine/threonine kinase activity)
miR7760-p3_1	TRINITY_DN12615_c0_g1	TRINITY_DN12615_c0_g1	-	4	2013-2030	1
miR7760-p3_1	TRINITY_DN29207_c0_g2	TRINITY_DN29207_c0_g2	-	4	1436-1453	1
miR7760-p3_1	TRINITY_DN8527_c0_g1	TRINITY_DN8527_c0_g1	sp|Q9LSK8|PP240_ARATH Pentatricopeptide repeat-containing protein At3g18020 OS=Arabidopsis thaliana GN=At3g18020 PE=2 SV=1	4	1813-1830	1
miR7760-p3_1	TRINITY_DN28796_c0_g1	TRINITY_DN28796_c0_g1	sp|A7HNE8|DDL_FERNB D-alanine--D-alanine ligase OS=Fervidobacterium nodosum (strain ATCC 35602 / DSM 5306 / Rt17-B1) GN=ddl PE=3 SV=1	4	2978-2995	1	GO:0005618(cell wall);GO:0005737(cytoplasm);GO:0005524(ATP binding);GO:0008716(D-alanine-D-alanine ligase activity);GO:0046872(metal ion binding);GO:0007047(cellular cell wall organization);GO:0009252(peptidoglycan biosynthetic process);GO:0008360(regulation of cell shape)
miR7760-p3_1	TRINITY_DN17167_c0_g1	TRINITY_DN17167_c0_g1	-	4	418-436	1
miR7760-p3_1	TRINITY_DN33084_c2_g2	TRINITY_DN33084_c2_g2	sp|Q8GXG6|B3GTH_ARATH Probable beta-1,3-galactosyltransferase 17 OS=Arabidopsis thaliana GN=B3GALT17 PE=2 SV=2	4	1454-1471	1	GO:0000139(Golgi membrane);GO:0016021(integral to membrane);GO:0008378(galactosyltransferase activity);GO:0005529(sugar binding);GO:0006486(protein glycosylation)
miR7760-p3_1	TRINITY_DN13912_c0_g1	TRINITY_DN13912_c0_g1	-	4	584-601	1
miR7760-p3_1	TRINITY_DN28990_c1_g2	TRINITY_DN28990_c1_g2	-	4	4896-4913	1
miR7760-p3_1	TRINITY_DN22374_c1_g1	TRINITY_DN22374_c1_g1	-	4	2264-2281	1
miR7760-p3_1	TRINITY_DN22825_c0_g1	TRINITY_DN22825_c0_g1	-	4	1584-1601	1
miR7760-p3_1	TRINITY_DN26748_c0_g1	TRINITY_DN26748_c0_g1	sp|Q9SZC9|HMA6_ARATH Copper-transporting ATPase PAA1, chloroplastic OS=Arabidopsis thaliana GN=PAA1 PE=2 SV=1	4	2717-2734	1	GO:0009941(chloroplast envelope);GO:0009570(chloroplast stroma);GO:0016021(integral to membrane);GO:0005524(ATP binding);GO:0004008(copper-exporting ATPase activity);GO:0046872(metal ion binding);GO:0006754(ATP biosynthetic process);GO:0009767(photosynthetic electron transport chain)
miR7760-p3_1	TRINITY_DN32970_c0_g4	TRINITY_DN32970_c0_g4	sp|Q9FGI1|LTN1_ARATH E3 ubiquitin-protein ligase listerin OS=Arabidopsis thaliana GN=At5g58410 PE=3 SV=1	4	5999-6016	1	GO:0005829(cytosol);GO:0016874(ligase activity);GO:0008270(zinc ion binding)
miR7760-p3_1	TRINITY_DN19786_c2_g1	TRINITY_DN19786_c2_g1	sp|O49523|DSEL_ARATH Phospholipase A1-IIgamma OS=Arabidopsis thaliana GN=DSEL PE=1 SV=1	4	2644-2660	1	GO:0005737(cytoplasm);GO:0047372(acylglycerol lipase activity);GO:0008970(phospholipase A1 activity);GO:0004806(triglyceride lipase activity);GO:0046340(diacylglycerol catabolic process);GO:0019915(lipid storage);GO:0052651(monoacylglycerol catabolic process);GO:0010187(negative regulation of seed germination)
miR7760-p3_1	TRINITY_DN20106_c0_g1	TRINITY_DN20106_c0_g1	sp|Q96282|CLCC_ARATH Chloride channel protein CLC-c OS=Arabidopsis thaliana GN=CLC-C PE=1 SV=1	4	2799-2816	1	GO:0034707(chloride channel complex);GO:0009705(plant-type vacuole membrane);GO:0005247(voltage-gated chloride channel activity)
miR7760-p3_1	TRINITY_DN32782_c0_g1	TRINITY_DN32782_c0_g1	-	4	3477-3494	1
miR7760-p3_1	TRINITY_DN19518_c0_g1	TRINITY_DN19518_c0_g1	sp|P92961|PROT1_ARATH Proline transporter 1 OS=Arabidopsis thaliana GN=PROT1 PE=1 SV=1	4	2359-2376	1
miR7760-p3_1	TRINITY_DN18016_c0_g1	TRINITY_DN18016_c0_g1	sp|Q9LY00|WRK70_ARATH Probable WRKY transcription factor 70 OS=Arabidopsis thaliana GN=WRKY70 PE=2 SV=1	4	501-517	1	GO:0005634(nucleus);GO:0043565(sequence-specific DNA binding);GO:0003700(sequence-specific DNA binding transcription factor activity);GO:0050832(defense response to fungus);GO:0009864(induced systemic resistance, jasmonic acid mediated signaling pathway);GO:0045892(negative regulation of transcription, DNA-dependent);GO:0010200(response to chitin);GO:0009862(systemic acquired resistance, salicyli…
miR7760-p3_1	TRINITY_DN30444_c1_g1	TRINITY_DN30444_c1_g1	sp|Q9SX31|PERK9_ARATH Proline-rich receptor-like protein kinase PERK9 OS=Arabidopsis thaliana GN=PERK9 PE=2 SV=1	4	1898-1915	1	GO:0016021(integral to membrane);GO:0005886(plasma membrane);GO:0005524(ATP binding);GO:0004674(protein serine/threonine kinase activity)	ko00270(Cysteine and methionine metabolism)
miR7760-p3_1	TRINITY_DN48867_c0_g1	TRINITY_DN48867_c0_g1	sp|Q9LR64|Y1360_ARATH Thylakoid lumenal protein At1g03610, chloroplastic OS=Arabidopsis thaliana GN=At1g03600 PE=1 SV=1	4	215-231	1	GO:0009543(chloroplast thylakoid lumen);GO:0009535(chloroplast thylakoid membrane);GO:0010206(photosystem II repair)	ko00195(Photosynthesis)
miR7760-p3_1	TRINITY_DN31820_c0_g1	TRINITY_DN31820_c0_g1	sp|Q9ZT82|CALSC_ARATH Callose synthase 12 OS=Arabidopsis thaliana GN=CALS12 PE=1 SV=1	4	424-442	1	GO:0000148(1,3-beta-D-glucan synthase complex);GO:0016021(integral to membrane);GO:0009506(plasmodesma);GO:0003843(1,3-beta-D-glucan synthase activity);GO:0006075(1,3-beta-D-glucan biosynthetic process);GO:0007047(cellular cell wall organization);GO:0052544(defense response by callose deposition in cell wall);GO:0009870(defense response signaling pathway, resistance gene-dependent);GO:0042742(def…
miR7760-p3_1	TRINITY_DN27834_c0_g1	TRINITY_DN27834_c0_g1	-	4	5219-5235	1		ko03050(Proteasome)
miR7760-p3_1	TRINITY_DN50220_c0_g1	TRINITY_DN50220_c0_g1	-	4	192-209	1
miR7760-p3_1	TRINITY_DN8651_c0_g2	TRINITY_DN8651_c0_g2	-	4	66-83	1
miR7760-p3_1	TRINITY_DN24621_c1_g1	TRINITY_DN24621_c1_g1	sp|Q92804|RBP56_HUMAN TATA-binding protein-associated factor 2N OS=Homo sapiens GN=TAF15 PE=1 SV=1	4	2602-2619	1	GO:0005737(cytoplasm);GO:0005634(nucleus);GO:0003677(DNA binding);GO:0000166(nucleotide binding);GO:0005515(protein binding);GO:0003723(RNA binding);GO:0008270(zinc ion binding);GO:0045893(positive regulation of transcription, DNA-dependent)
miR7760-p3_1	TRINITY_DN12363_c0_g1	TRINITY_DN12363_c0_g1	sp|Q9C660|PEK10_ARATH Proline-rich receptor-like protein kinase PERK10 OS=Arabidopsis thaliana GN=PERK10 PE=1 SV=2	4	49-66	1	GO:0016021(integral to membrane);GO:0005886(plasma membrane);GO:0005524(ATP binding);GO:0004674(protein serine/threonine kinase activity)
miR7760-p3_1	TRINITY_DN33474_c0_g1	TRINITY_DN33474_c0_g1	-	4	247-264	1
miR7760-p3_1	TRINITY_DN31452_c0_g1	TRINITY_DN31452_c0_g1	sp|P45726|PALY_CAMSI Phenylalanine ammonia-lyase OS=Camellia sinensis GN=PAL PE=2 SV=1	4	2102-2120	1	GO:0005737(cytoplasm);GO:0016841(ammonia-lyase activity);GO:0009058(biosynthetic process);GO:0006559(L-phenylalanine catabolic process);GO:0009698(phenylpropanoid metabolic process)	ko00360(Phenylalanine metabolism);ko00910(Nitrogen metabolism);ko00940(Phenylpropanoid biosynthesis)
miR7760-p3_1	TRINITY_DN27117_c1_g1	TRINITY_DN27117_c1_g1	sp|P42698|DR111_ARATH DNA-damage-repair/toleration protein DRT111, chloroplastic OS=Arabidopsis thaliana GN=DRT111 PE=2 SV=2	4	1079-1097	1	GO:0009507(chloroplast);GO:0005634(nucleus);GO:0000166(nucleotide binding);GO:0003723(RNA binding);GO:0006281(DNA repair)
miR7760-p3_1	TRINITY_DN24621_c1_g1	TRINITY_DN24621_c1_g1	sp|Q92804|RBP56_HUMAN TATA-binding protein-associated factor 2N OS=Homo sapiens GN=TAF15 PE=1 SV=1	4	1504-1521	1	GO:0005737(cytoplasm);GO:0005634(nucleus);GO:0003677(DNA binding);GO:0000166(nucleotide binding);GO:0005515(protein binding);GO:0003723(RNA binding);GO:0008270(zinc ion binding);GO:0045893(positive regulation of transcription, DNA-dependent)
miR7760-p3_1	TRINITY_DN24621_c1_g1	TRINITY_DN24621_c1_g1	sp|Q92804|RBP56_HUMAN TATA-binding protein-associated factor 2N OS=Homo sapiens GN=TAF15 PE=1 SV=1	4	2518-2535	1	GO:0005737(cytoplasm);GO:0005634(nucleus);GO:0003677(DNA binding);GO:0000166(nucleotide binding);GO:0005515(protein binding);GO:0003723(RNA binding);GO:0008270(zinc ion binding);GO:0045893(positive regulation of transcription, DNA-dependent)
miR7760-p5_1	TRINITY_DN19742_c2_g1	TRINITY_DN19742_c2_g1	sp|Q9SX31|PERK9_ARATH Proline-rich receptor-like protein kinase PERK9 OS=Arabidopsis thaliana GN=PERK9 PE=2 SV=1	0	242-259	1	GO:0016021(integral to membrane);GO:0005886(plasma membrane);GO:0005524(ATP binding);GO:0004674(protein serine/threonine kinase activity)
miR7760-p5_1	TRINITY_DN19742_c2_g2	TRINITY_DN19742_c2_g2	-	0	95-112	1
miR7760-p5_1	TRINITY_DN19742_c2_g1	TRINITY_DN19742_c2_g1	sp|Q9SX31|PERK9_ARATH Proline-rich receptor-like protein kinase PERK9 OS=Arabidopsis thaliana GN=PERK9 PE=2 SV=1	0	95-112	1	GO:0016021(integral to membrane);GO:0005886(plasma membrane);GO:0005524(ATP binding);GO:0004674(protein serine/threonine kinase activity)
miR7760-p5_1	TRINITY_DN6920_c0_g1	TRINITY_DN6920_c0_g1	sp|O64847|U136_ARATH UPF0136 membrane protein At2g26240 OS=Arabidopsis thaliana GN=At2g26240 PE=3 SV=1	1.5	761-778	1	GO:0016021(integral to membrane);GO:0005739(mitochondrion)
miR7760-p5_1	TRINITY_DN19666_c0_g1	TRINITY_DN19666_c0_g1	sp|Q9FJ93|DRE1D_ARATH Dehydration-responsive element-binding protein 1D OS=Arabidopsis thaliana GN=DREB1D PE=2 SV=1	2	480-497	1	GO:0005634(nucleus);GO:0003677(DNA binding);GO:0003700(sequence-specific DNA binding transcription factor activity);GO:0009738(abscisic acid mediated signaling pathway);GO:0006950(response to stress)
miR7760-p5_1	TRINITY_DN12363_c0_g1	TRINITY_DN12363_c0_g1	sp|Q9C660|PEK10_ARATH Proline-rich receptor-like protein kinase PERK10 OS=Arabidopsis thaliana GN=PERK10 PE=1 SV=2	2	175-192	1	GO:0016021(integral to membrane);GO:0005886(plasma membrane);GO:0005524(ATP binding);GO:0004674(protein serine/threonine kinase activity)
miR7760-p5_1	TRINITY_DN29914_c1_g1	TRINITY_DN29914_c1_g1	-	2	340-357	1
miR7760-p5_1	TRINITY_DN3966_c0_g1	TRINITY_DN3966_c0_g1	sp|Q9LK03|PERK2_ARATH Proline-rich receptor-like protein kinase PERK2 OS=Arabidopsis thaliana GN=PERK2 PE=2 SV=3	2	456-473	1	GO:0016021(integral to membrane);GO:0005886(plasma membrane);GO:0005524(ATP binding);GO:0004674(protein serine/threonine kinase activity);GO:0004872(receptor activity)
miR7760-p5_1	TRINITY_DN28463_c2_g1	TRINITY_DN28463_c2_g1	sp|Q8VYE2|TIM50_ARATH Mitochondrial import inner membrane translocase subunit TIM50 OS=Arabidopsis thaliana GN=TIM50 PE=1 SV=1	2	1350-1367	1	GO:0016021(integral to membrane);GO:0005743(mitochondrial inner membrane);GO:0015031(protein transport);GO:0055085(transmembrane transport)
miR7760-p5_1	TRINITY_DN12363_c0_g1	TRINITY_DN12363_c0_g1	sp|Q9C660|PEK10_ARATH Proline-rich receptor-like protein kinase PERK10 OS=Arabidopsis thaliana GN=PERK10 PE=1 SV=2	2	55-72	1	GO:0016021(integral to membrane);GO:0005886(plasma membrane);GO:0005524(ATP binding);GO:0004674(protein serine/threonine kinase activity)
miR7760-p5_1	TRINITY_DN41461_c0_g1	TRINITY_DN41461_c0_g1	-	2.5	54-71	1
miR7760-p5_1	TRINITY_DN21033_c0_g1	TRINITY_DN21033_c0_g1	sp|Q9LZZ7|SKA1_ARATH Spindle and kinetochore-associated protein 1 homolog OS=Arabidopsis thaliana GN=At3g60660 PE=2 SV=1	2.5	993-1010	1
miR7760-p5_1	TRINITY_DN20945_c0_g1	TRINITY_DN20945_c0_g1	-	2.5	221-238	1
miR7760-p5_1	TRINITY_DN17059_c1_g1	TRINITY_DN17059_c1_g1	-	2.5	298-315	1
miR7760-p5_1	TRINITY_DN17059_c1_g2	TRINITY_DN17059_c1_g2	-	2.5	298-315	1
miR7760-p5_1	TRINITY_DN4181_c0_g1	TRINITY_DN4181_c0_g1	sp|Q93Z00|TCP14_ARATH Transcription factor TCP14 OS=Arabidopsis thaliana GN=TCP14 PE=1 SV=1	2.5	209-226	1	GO:0005634(nucleus);GO:0003677(DNA binding);GO:0031347(regulation of defense response);GO:0010029(regulation of seed germination);GO:0006355(regulation of transcription, DNA-dependent);GO:0009737(response to abscisic acid stimulus);GO:0009739(response to gibberellin stimulus);GO:0006351(transcription, DNA-dependent)
miR7760-p5_1	TRINITY_DN20945_c0_g2	TRINITY_DN20945_c0_g2	-	2.5	498-515	1
miR7760-p5_1	TRINITY_DN19988_c0_g1	TRINITY_DN19988_c0_g1	sp|Q84MB3|ACCH1_ARATH 1-aminocyclopropane-1-carboxylate oxidase homolog 1 OS=Arabidopsis thaliana GN=At1g06620 PE=2 SV=1	2.5	1182-1199	1	GO:0046872(metal ion binding);GO:0016706(oxidoreductase activity, acting on paired donors, with incorporation or reduction of molecular oxygen, 2-oxoglutarate as one donor, and incorporation of one atom each of oxygen into both donors)
miR7760-p5_1	TRINITY_DN20422_c0_g1	TRINITY_DN20422_c0_g1	sp|Q9LHN7|PHSC_ARATH Probable polyamine transporter At3g13620 OS=Arabidopsis thaliana GN=At3g13620 PE=2 SV=1	2.5	1329-1346	1
miR7760-p5_1	TRINITY_DN28759_c0_g1	TRINITY_DN28759_c0_g1	sp|Q9LK03|PERK2_ARATH Proline-rich receptor-like protein kinase PERK2 OS=Arabidopsis thaliana GN=PERK2 PE=2 SV=3	2.5	504-521	1	GO:0016021(integral to membrane);GO:0005886(plasma membrane);GO:0005524(ATP binding);GO:0004674(protein serine/threonine kinase activity);GO:0004872(receptor activity)
miR7760-p5_1	TRINITY_DN18132_c0_g12	TRINITY_DN18132_c0_g12	sp|Q9ZNU9|SAP3_ARATH Zinc finger A20 and AN1 domain-containing stress-associated protein 3 OS=Arabidopsis thaliana GN=SAP3 PE=2 SV=1	2.5	427-444	1	GO:0003677(DNA binding);GO:0008270(zinc ion binding)
miR7760-p5_1	TRINITY_DN24649_c0_g3	TRINITY_DN24649_c0_g3	-	2.5	347-364	1
miR7760-p5_1	TRINITY_DN24900_c0_g1	TRINITY_DN24900_c0_g1	sp|Q94BZ5|HSFA5_ARATH Heat stress transcription factor A-5 OS=Arabidopsis thaliana GN=HSFA5 PE=2 SV=1	2.5	1748-1765	1	GO:0005737(cytoplasm);GO:0005634(nucleus);GO:0043565(sequence-specific DNA binding);GO:0003700(sequence-specific DNA binding transcription factor activity);GO:0006950(response to stress)
miR7760-p5_1	TRINITY_DN28310_c0_g1	TRINITY_DN28310_c0_g1	sp|O65020|ETO1_ARATH Ethylene-overproduction protein 1 OS=Arabidopsis thaliana GN=ETO1 PE=1 SV=2	2.5	3465-3482	1	GO:0030674(protein binding, bridging);GO:0009873(ethylene mediated signaling pathway);GO:0043161(proteasomal ubiquitin-dependent protein catabolic process);GO:0010364(regulation of ethylene biosynthetic process);GO:2000069(regulation of post-embryonic root development);GO:0017145(stem cell division);GO:0010182(sugar mediated signaling pathway)
miR7760-p5_1	TRINITY_DN32358_c1_g1	TRINITY_DN32358_c1_g1	sp|Q9STW6|HSP7F_ARATH Heat shock 70 kDa protein 6, chloroplastic OS=Arabidopsis thaliana GN=HSP70-6 PE=1 SV=1	2.5	2368-2385	1		ko03040(Spliceosome);ko04010(MAPK signaling pathway);ko04144(Endocytosis);ko04612(Antigen processing and presentation)
miR7760-p5_1	TRINITY_DN27761_c2_g3	TRINITY_DN27761_c2_g3	sp|O81316|SCL6_ARATH Scarecrow-like protein 6 OS=Arabidopsis thaliana GN=SCL6 PE=1 SV=1	2.5	2324-2341	1	GO:0005634(nucleus);GO:0005515(protein binding);GO:0051301(cell division);GO:0007623(circadian rhythm);GO:0006355(regulation of transcription, DNA-dependent);GO:0048768(root hair cell tip growth);GO:0006351(transcription, DNA-dependent)
miR7760-p5_1	TRINITY_DN23773_c0_g1	TRINITY_DN23773_c0_g1	sp|Q10LG8|TLP6_ORYSJ Tubby-like F-box protein 6 OS=Oryza sativa subsp. japonica GN=TULP6 PE=2 SV=1	2.5	2102-2120	1
miR7760-p5_1	TRINITY_DN6920_c0_g1	TRINITY_DN6920_c0_g1	sp|O64847|U136_ARATH UPF0136 membrane protein At2g26240 OS=Arabidopsis thaliana GN=At2g26240 PE=3 SV=1	2.5	719-736	1	GO:0016021(integral to membrane);GO:0005739(mitochondrion)
miR7760-p5_1	TRINITY_DN23718_c0_g3	TRINITY_DN23718_c0_g3	-	3	42-59	1
miR7760-p5_1	TRINITY_DN23718_c0_g1	TRINITY_DN23718_c0_g1	-	3	42-59	1
miR7760-p5_1	TRINITY_DN31987_c1_g7	TRINITY_DN31987_c1_g7	-	3	97-114	1
miR7760-p5_1	TRINITY_DN31987_c1_g9	TRINITY_DN31987_c1_g9	-	3	104-121	1
miR7760-p5_1	TRINITY_DN23718_c0_g4	TRINITY_DN23718_c0_g4	-	3	42-59	1
miR7760-p5_1	TRINITY_DN31987_c1_g6	TRINITY_DN31987_c1_g6	-	3	159-176	1
miR7760-p5_1	TRINITY_DN31987_c1_g1	TRINITY_DN31987_c1_g1	-	3	159-176	1
miR7760-p5_1	TRINITY_DN31987_c1_g12	TRINITY_DN31987_c1_g12	-	3	142-159	1
miR7760-p5_1	TRINITY_DN32507_c2_g6	TRINITY_DN32507_c2_g6	-	3	66-83	1
miR7760-p5_1	TRINITY_DN17905_c0_g1	TRINITY_DN17905_c0_g1	-	3	58-75	1
miR7760-p5_1	TRINITY_DN10542_c0_g2	TRINITY_DN10542_c0_g2	-	3	190-207	1
miR7760-p5_1	TRINITY_DN10542_c0_g1	TRINITY_DN10542_c0_g1	-	3	203-220	1
miR7760-p5_1	TRINITY_DN10542_c0_g3	TRINITY_DN10542_c0_g3	-	3	203-220	1
miR7760-p5_1	TRINITY_DN10668_c0_g1	TRINITY_DN10668_c0_g1	sp|Q9T0K5|LRX3_ARATH Leucine-rich repeat extensin-like protein 3 OS=Arabidopsis thaliana GN=LRX3 PE=1 SV=1	3	3-20	1	GO:0005576(extracellular region);GO:0009505(plant-type cell wall);GO:0009506(plasmodesma);GO:0005515(protein binding);GO:0007047(cellular cell wall organization)
miR7760-p5_1	TRINITY_DN31987_c1_g11	TRINITY_DN31987_c1_g11	-	3	249-266	1
miR7760-p5_1	TRINITY_DN3069_c78_g1	TRINITY_DN3069_c78_g1	-	3	114-131	1
miR7760-p5_1	TRINITY_DN6787_c0_g1	TRINITY_DN6787_c0_g1	sp|Q9LK03|PERK2_ARATH Proline-rich receptor-like protein kinase PERK2 OS=Arabidopsis thaliana GN=PERK2 PE=2 SV=3	3	243-260	1	GO:0016021(integral to membrane);GO:0005886(plasma membrane);GO:0005524(ATP binding);GO:0004674(protein serine/threonine kinase activity);GO:0004872(receptor activity)
miR7760-p5_1	TRINITY_DN31940_c92_g1	TRINITY_DN31940_c92_g1	sp|Q9LK03|PERK2_ARATH Proline-rich receptor-like protein kinase PERK2 OS=Arabidopsis thaliana GN=PERK2 PE=2 SV=3	3	255-272	1	GO:0016021(integral to membrane);GO:0005886(plasma membrane);GO:0005524(ATP binding);GO:0004674(protein serine/threonine kinase activity);GO:0004872(receptor activity)
miR7760-p5_1	TRINITY_DN4083_c0_g5	TRINITY_DN4083_c0_g5	-	3	54-71	1
miR7760-p5_1	TRINITY_DN4083_c0_g6	TRINITY_DN4083_c0_g6	-	3	54-71	1
miR7760-p5_1	TRINITY_DN4083_c0_g3	TRINITY_DN4083_c0_g3	sp|A4QSS5|DBP2_MAGO7 ATP-dependent RNA helicase DBP2 OS=Magnaporthe oryzae (strain 70-15 / ATCC MYA-4617 / FGSC 8958) GN=DBP2 PE=3 SV=1	3	54-71	1	GO:0005737(cytoplasm);GO:0005634(nucleus);GO:0005524(ATP binding);GO:0008026(ATP-dependent helicase activity);GO:0003723(RNA binding);GO:0000184(nuclear-transcribed mRNA catabolic process, nonsense-mediated decay);GO:0006364(rRNA processing)
miR7760-p5_1	TRINITY_DN4083_c0_g1	TRINITY_DN4083_c0_g1	-	3	54-71	1
miR7760-p5_1	TRINITY_DN4083_c0_g10	TRINITY_DN4083_c0_g10	-	3	54-71	1
miR7760-p5_1	TRINITY_DN1534_c0_g1	TRINITY_DN1534_c0_g1	-	3	337-354	1
miR7760-p5_1	TRINITY_DN49289_c0_g1	TRINITY_DN49289_c0_g1	-	3	183-200	1
miR7760-p5_1	TRINITY_DN4824_c0_g1	TRINITY_DN4824_c0_g1	-	3	68-85	1
miR7760-p5_1	TRINITY_DN23085_c4_g1	TRINITY_DN23085_c4_g1	sp|Q9LK03|PERK2_ARATH Proline-rich receptor-like protein kinase PERK2 OS=Arabidopsis thaliana GN=PERK2 PE=2 SV=3	3	580-597	1	GO:0016021(integral to membrane);GO:0005886(plasma membrane);GO:0005524(ATP binding);GO:0004674(protein serine/threonine kinase activity);GO:0004872(receptor activity)	ko04622(RIG-I-like receptor signaling pathway)
miR7760-p5_1	TRINITY_DN32628_c1_g2	TRINITY_DN32628_c1_g2	sp|Q67SC6|OBG_SYMTH GTPase obg OS=Symbiobacterium thermophilum (strain T / IAM 14863) GN=obg PE=3 SV=1	3	1244-1261	1	GO:0005737(cytoplasm);GO:0005525(GTP binding);GO:0003924(GTPase activity);GO:0000287(magnesium ion binding)
miR7760-p5_1	TRINITY_DN42646_c0_g1	TRINITY_DN42646_c0_g1	sp|Q99070|GRP2_SORBI Glycine-rich RNA-binding protein 2 OS=Sorghum bicolor GN=GRP2 PE=2 SV=1	3	245-262	1	GO:0000166(nucleotide binding);GO:0003723(RNA binding)
miR7760-p5_1	TRINITY_DN30664_c1_g1	TRINITY_DN30664_c1_g1	sp|Q9XIK3|ISCAP_ARATH Iron-sulfur assembly protein IscA, chloroplastic OS=Arabidopsis thaliana GN=ISCA PE=2 SV=2	3	474-491	1	GO:0009570(chloroplast stroma);GO:0051536(iron-sulfur cluster binding);GO:0046872(metal ion binding);GO:0005198(structural molecule activity);GO:0016226(iron-sulfur cluster assembly)
miR7760-p5_1	TRINITY_DN7134_c0_g1	TRINITY_DN7134_c0_g1	-	3	39-56	1
miR7760-p5_1	TRINITY_DN18002_c1_g1	TRINITY_DN18002_c1_g1	-	3	210-227	1
miR7760-p5_1	TRINITY_DN10956_c0_g1	TRINITY_DN10956_c0_g1	sp|P46604|HAT22_ARATH Homeobox-leucine zipper protein HAT22 OS=Arabidopsis thaliana GN=HAT22 PE=1 SV=1	3	168-185	1	GO:0005634(nucleus);GO:0043565(sequence-specific DNA binding);GO:0003700(sequence-specific DNA binding transcription factor activity);GO:0009735(response to cytokinin stimulus)
miR7760-p5_1	TRINITY_DN10956_c0_g2	TRINITY_DN10956_c0_g2	sp|P46604|HAT22_ARATH Homeobox-leucine zipper protein HAT22 OS=Arabidopsis thaliana GN=HAT22 PE=1 SV=1	3	168-185	1	GO:0005634(nucleus);GO:0043565(sequence-specific DNA binding);GO:0003700(sequence-specific DNA binding transcription factor activity);GO:0009735(response to cytokinin stimulus)
miR7760-p5_1	TRINITY_DN26317_c0_g1	TRINITY_DN26317_c0_g1	sp|P43254|COP1_ARATH E3 ubiquitin-protein ligase COP1 OS=Arabidopsis thaliana GN=COP1 PE=1 SV=2	3	2322-2339	1	GO:0005737(cytoplasm);GO:0000152(nuclear ubiquitin ligase complex);GO:0042802(identical protein binding);GO:0004842(ubiquitin-protein ligase activity);GO:0008270(zinc ion binding);GO:0046283(anthocyanin metabolic process);GO:0006281(DNA repair);GO:0009649(entrainment of circadian clock);GO:0009640(photomorphogenesis);GO:0048573(photoperiodism, flowering);GO:0009585(red, far-red light phototransdu…	ko04115(p53 signaling pathway);ko04120(Ubiquitin mediated proteolysis)
miR7760-p5_1	TRINITY_DN10010_c0_g3	TRINITY_DN10010_c0_g3	-	3	242-259	1
miR7760-p5_1	TRINITY_DN31035_c0_g1	TRINITY_DN31035_c0_g1	sp|Q8GZA4|CBSX6_ARATH CBS domain-containing protein CBSX6 OS=Arabidopsis thaliana GN=CBSX6 PE=1 SV=1	3	1378-1395	1	GO:0016021(integral to membrane);GO:0005774(vacuolar membrane)
miR7760-p5_1	TRINITY_DN21635_c0_g1	TRINITY_DN21635_c0_g1	sp|Q8H156|RAN3_ARATH GTP-binding nuclear protein Ran-3 OS=Arabidopsis thaliana GN=RAN3 PE=1 SV=2	3	862-879	1	GO:0005634(nucleus);GO:0009506(plasmodesma);GO:0005525(GTP binding);GO:0003924(GTPase activity);GO:0005515(protein binding);GO:0006606(protein import into nucleus);GO:0007264(small GTPase mediated signal transduction)
miR7760-p5_1	TRINITY_DN32592_c5_g2	TRINITY_DN32592_c5_g2	sp|P23881|TCEA3_MOUSE Transcription elongation factor A protein 3 OS=Mus musculus GN=Tcea3 PE=1 SV=3	3	1800-1817	1	GO:0005634(nucleus);GO:0003677(DNA binding);GO:0003746(translation elongation factor activity);GO:0008270(zinc ion binding);GO:0032784(regulation of transcription elongation, DNA-dependent);GO:0006357(regulation of transcription from RNA polymerase II promoter);GO:0006354(transcription elongation, DNA-dependent)
miR7760-p5_1	TRINITY_DN10010_c0_g1	TRINITY_DN10010_c0_g1	sp|O65530|PEK14_ARATH Proline-rich receptor-like protein kinase PERK14 OS=Arabidopsis thaliana GN=PERK14 PE=2 SV=1	3	242-259	1	GO:0016021(integral to membrane);GO:0005886(plasma membrane);GO:0005524(ATP binding);GO:0004674(protein serine/threonine kinase activity)	ko00270(Cysteine and methionine metabolism)
miR7760-p5_1	TRINITY_DN26545_c0_g1	TRINITY_DN26545_c0_g1	sp|Q6PKG0|LARP1_HUMAN La-related protein 1 OS=Homo sapiens GN=LARP1 PE=1 SV=2	3	2050-2067	1	GO:0003723(RNA binding)
miR7760-p5_1	TRINITY_DN30664_c0_g1	TRINITY_DN30664_c0_g1	-	3	2154-2171	1
miR7760-p5_1	TRINITY_DN10010_c0_g2	TRINITY_DN10010_c0_g2	-	3	242-259	1
miR7760-p5_1	TRINITY_DN28267_c0_g9	TRINITY_DN28267_c0_g9	-	3	763-780	1
miR7760-p5_1	TRINITY_DN17779_c0_g1	TRINITY_DN17779_c0_g1	sp|Q8LPR5|TCP4_ARATH Transcription factor TCP4 OS=Arabidopsis thaliana GN=TCP4 PE=2 SV=1	3	822-839	1	GO:0005634(nucleus);GO:0003677(DNA binding);GO:0009793(embryo development ending in seed dormancy);GO:0048366(leaf development);GO:0006355(regulation of transcription, DNA-dependent);GO:0006351(transcription, DNA-dependent)
miR7760-p5_1	TRINITY_DN24865_c1_g1	TRINITY_DN24865_c1_g1	-	3	1403-1420	1
miR7760-p5_1	TRINITY_DN28215_c1_g1	TRINITY_DN28215_c1_g1	-	3	7776-7793	1
miR7760-p5_1	TRINITY_DN19931_c0_g1	TRINITY_DN19931_c0_g1	sp|O65023|EAAC_ARATH Probable envelope ADP,ATP carrier protein, chloroplastic OS=Arabidopsis thaliana GN=EAAC PE=2 SV=2	3	1460-1477	1	GO:0031969(chloroplast membrane);GO:0016021(integral to membrane);GO:0005743(mitochondrial inner membrane);GO:0005488(binding);GO:0009624(response to nematode);GO:0055085(transmembrane transport)
miR7760-p5_1	TRINITY_DN19248_c0_g1	TRINITY_DN19248_c0_g1	sp|O80982|HSFA2_ARATH Heat stress transcription factor A-2 OS=Arabidopsis thaliana GN=HSFA2 PE=1 SV=1	3	2313-2330	1	GO:0005737(cytoplasm);GO:0005634(nucleus);GO:0005515(protein binding);GO:0043565(sequence-specific DNA binding);GO:0003700(sequence-specific DNA binding transcription factor activity);GO:0034605(cellular response to heat);GO:0071456(cellular response to hypoxia);GO:0034620(cellular response to unfolded protein);GO:0010286(heat acclimation);GO:0045893(positive regulation of transcription, DNA-depe…
miR7760-p5_1	TRINITY_DN27213_c0_g2	TRINITY_DN27213_c0_g2	-	3	588-605	1
miR7760-p5_1	TRINITY_DN26386_c0_g1	TRINITY_DN26386_c0_g1	-	3	3137-3154	1
miR7760-p5_1	TRINITY_DN23828_c0_g1	TRINITY_DN23828_c0_g1	-	3	2114-2131	1
miR7760-p5_1	TRINITY_DN29762_c0_g1	TRINITY_DN29762_c0_g1	-	3	2109-2126	1
miR7760-p5_1	TRINITY_DN24798_c0_g1	TRINITY_DN24798_c0_g1	sp|Q9LH89|Y3885_ARATH Uncharacterized protein At3g28850 OS=Arabidopsis thaliana GN=At3g28850 PE=1 SV=1	3	329-346	1	GO:0005886(plasma membrane);GO:0009055(electron carrier activity);GO:0015035(protein disulfide oxidoreductase activity);GO:0045454(cell redox homeostasis)
miR7760-p5_1	TRINITY_DN2405_c0_g1	TRINITY_DN2405_c0_g1	-	3	846-864	1
miR7760-p5_1	TRINITY_DN2405_c0_g2	TRINITY_DN2405_c0_g2	-	3	846-864	1
miR7760-p5_1	TRINITY_DN30542_c1_g1	TRINITY_DN30542_c1_g1	sp|Q8W4P1|CDKC2_ARATH Cyclin-dependent kinase C-2 OS=Arabidopsis thaliana GN=CDKC-2 PE=1 SV=2	3	461-478	1	GO:0005829(cytosol);GO:0016604(nuclear body);GO:0005524(ATP binding);GO:0004693(cyclin-dependent protein kinase activity);GO:0005515(protein binding);GO:0008353(RNA polymerase II carboxy-terminal domain kinase activity);GO:0048440(carpel development);GO:0048366(leaf development);GO:0006397(mRNA processing);GO:0050792(regulation of viral reproduction);GO:0009615(response to virus)
miR7760-p5_1	TRINITY_DN20945_c0_g1	TRINITY_DN20945_c0_g1	-	3	52-69	1
miR7760-p5_1	TRINITY_DN20945_c0_g2	TRINITY_DN20945_c0_g2	-	3	329-346	1
miR7760-p5_1	TRINITY_DN32904_c2_g8	TRINITY_DN32904_c2_g8	-	3.5	33-50	1
miR7760-p5_1	TRINITY_DN12139_c0_g3	TRINITY_DN12139_c0_g3	-	3.5	126-143	1
miR7760-p5_1	TRINITY_DN23718_c0_g2	TRINITY_DN23718_c0_g2	-	3.5	50-67	1
miR7760-p5_1	TRINITY_DN27692_c1_g6	TRINITY_DN27692_c1_g6	-	3.5	122-139	1
miR7760-p5_1	TRINITY_DN27692_c1_g4	TRINITY_DN27692_c1_g4	-	3.5	122-139	1
miR7760-p5_1	TRINITY_DN27692_c1_g1	TRINITY_DN27692_c1_g1	-	3.5	122-139	1
miR7760-p5_1	TRINITY_DN2248_c0_g1	TRINITY_DN2248_c0_g1	-	3.5	60-77	1
miR7760-p5_1	TRINITY_DN17236_c0_g1	TRINITY_DN17236_c0_g1	-	3.5	1230-1247	1
miR7760-p5_1	TRINITY_DN18039_c1_g1	TRINITY_DN18039_c1_g1	-	3.5	494-511	1
miR7760-p5_1	TRINITY_DN15859_c1_g1	TRINITY_DN15859_c1_g1	-	3.5	29-46	1
miR7760-p5_1	TRINITY_DN32236_c2_g13	TRINITY_DN32236_c2_g13	sp|Q03250|RBG7_ARATH Glycine-rich RNA-binding protein 7 OS=Arabidopsis thaliana GN=RBG7 PE=1 SV=1	3.5	25-42	1	GO:0009507(chloroplast);GO:0005829(cytosol);GO:0005634(nucleus);GO:0005777(peroxisome);GO:0009506(plasmodesma);GO:0003690(double-stranded DNA binding);GO:0000166(nucleotide binding);GO:0003723(RNA binding);GO:0003697(single-stranded DNA binding);GO:0007623(circadian rhythm);GO:0032508(DNA duplex unwinding);GO:0045087(innate immune response);GO:0006406(mRNA export from nucleus);GO:0010119(regulati…
miR7760-p5_1	TRINITY_DN32236_c2_g3	TRINITY_DN32236_c2_g3	sp|Q03250|RBG7_ARATH Glycine-rich RNA-binding protein 7 OS=Arabidopsis thaliana GN=RBG7 PE=1 SV=1	3.5	25-42	1	GO:0009507(chloroplast);GO:0005829(cytosol);GO:0005634(nucleus);GO:0005777(peroxisome);GO:0009506(plasmodesma);GO:0003690(double-stranded DNA binding);GO:0000166(nucleotide binding);GO:0003723(RNA binding);GO:0003697(single-stranded DNA binding);GO:0007623(circadian rhythm);GO:0032508(DNA duplex unwinding);GO:0045087(innate immune response);GO:0006406(mRNA export from nucleus);GO:0010119(regulati…
miR7760-p5_1	TRINITY_DN32236_c2_g21	TRINITY_DN32236_c2_g21	sp|Q03250|RBG7_ARATH Glycine-rich RNA-binding protein 7 OS=Arabidopsis thaliana GN=RBG7 PE=1 SV=1	3.5	25-42	1	GO:0009507(chloroplast);GO:0005829(cytosol);GO:0005634(nucleus);GO:0005777(peroxisome);GO:0009506(plasmodesma);GO:0003690(double-stranded DNA binding);GO:0000166(nucleotide binding);GO:0003723(RNA binding);GO:0003697(single-stranded DNA binding);GO:0007623(circadian rhythm);GO:0032508(DNA duplex unwinding);GO:0045087(innate immune response);GO:0006406(mRNA export from nucleus);GO:0010119(regulati…
miR7760-p5_1	TRINITY_DN32236_c2_g20	TRINITY_DN32236_c2_g20	-	3.5	165-182	1
miR7760-p5_1	TRINITY_DN32236_c2_g30	TRINITY_DN32236_c2_g30	sp|Q03878|GRP1_DAUCA Glycine-rich RNA-binding protein OS=Daucus carota PE=2 SV=1	3.5	165-182	1	GO:0000166(nucleotide binding);GO:0003723(RNA binding)
miR7760-p5_1	TRINITY_DN32236_c2_g23	TRINITY_DN32236_c2_g23	sp|Q03878|GRP1_DAUCA Glycine-rich RNA-binding protein OS=Daucus carota PE=2 SV=1	3.5	165-182	1	GO:0000166(nucleotide binding);GO:0003723(RNA binding)
miR7760-p5_1	TRINITY_DN32236_c2_g8	TRINITY_DN32236_c2_g8	sp|Q9LK03|PERK2_ARATH Proline-rich receptor-like protein kinase PERK2 OS=Arabidopsis thaliana GN=PERK2 PE=2 SV=3	3.5	165-182	1	GO:0016021(integral to membrane);GO:0005886(plasma membrane);GO:0005524(ATP binding);GO:0004674(protein serine/threonine kinase activity);GO:0004872(receptor activity)
miR7760-p5_1	TRINITY_DN32236_c2_g27	TRINITY_DN32236_c2_g27	sp|O65530|PEK14_ARATH Proline-rich receptor-like protein kinase PERK14 OS=Arabidopsis thaliana GN=PERK14 PE=2 SV=1	3.5	165-182	1	GO:0016021(integral to membrane);GO:0005886(plasma membrane);GO:0005524(ATP binding);GO:0004674(protein serine/threonine kinase activity)
miR7760-p5_1	TRINITY_DN32236_c2_g26	TRINITY_DN32236_c2_g26	-	3.5	165-182	1
miR7760-p5_1	TRINITY_DN6797_c0_g1	TRINITY_DN6797_c0_g1	-	3.5	193-210	1
miR7760-p5_1	TRINITY_DN22292_c0_g1	TRINITY_DN22292_c0_g1	sp|P40267|H1_SOLPN Histone H1 OS=Solanum pennellii PE=2 SV=1	3.5	801-818	1	GO:0000786(nucleosome);GO:0005634(nucleus);GO:0003677(DNA binding);GO:0006334(nucleosome assembly);GO:0006950(response to stress)
miR7760-p5_1	TRINITY_DN23063_c0_g1	TRINITY_DN23063_c0_g1	-	3.5	276-293	1
miR7760-p5_1	TRINITY_DN45908_c2_g1	TRINITY_DN45908_c2_g1	sp|Q9LK03|PERK2_ARATH Proline-rich receptor-like protein kinase PERK2 OS=Arabidopsis thaliana GN=PERK2 PE=2 SV=3	3.5	239-257	1	GO:0016021(integral to membrane);GO:0005886(plasma membrane);GO:0005524(ATP binding);GO:0004674(protein serine/threonine kinase activity);GO:0004872(receptor activity)
miR7760-p5_1	TRINITY_DN20087_c0_g1	TRINITY_DN20087_c0_g1	-	3.5	166-183	1
miR7760-p5_1	TRINITY_DN11403_c0_g1	TRINITY_DN11403_c0_g1	sp|Q41188|CSP2_ARATH Cold shock protein 2 OS=Arabidopsis thaliana GN=CSP2 PE=1 SV=1	3.5	521-538	1
miR7760-p5_1	TRINITY_DN18093_c0_g1	TRINITY_DN18093_c0_g1	-	3.5	220-237	1
miR7760-p5_1	TRINITY_DN32236_c2_g7	TRINITY_DN32236_c2_g7	sp|Q03878|GRP1_DAUCA Glycine-rich RNA-binding protein OS=Daucus carota PE=2 SV=1	3.5	377-394	1	GO:0000166(nucleotide binding);GO:0003723(RNA binding)
miR7760-p5_1	TRINITY_DN20418_c0_g1	TRINITY_DN20418_c0_g1	-	3.5	910-927	1
miR7760-p5_1	TRINITY_DN20890_c0_g1	TRINITY_DN20890_c0_g1	sp|Q9SR33|ORP3B_ARATH Oxysterol-binding protein-related protein 3B OS=Arabidopsis thaliana GN=ORP3B PE=2 SV=1	3.5	1473-1490	1	GO:0005829(cytosol);GO:0008289(lipid binding);GO:0006869(lipid transport)
miR7760-p5_1	TRINITY_DN30542_c1_g1	TRINITY_DN30542_c1_g1	sp|Q8W4P1|CDKC2_ARATH Cyclin-dependent kinase C-2 OS=Arabidopsis thaliana GN=CDKC-2 PE=1 SV=2	3.5	2104-2121	1	GO:0005829(cytosol);GO:0016604(nuclear body);GO:0005524(ATP binding);GO:0004693(cyclin-dependent protein kinase activity);GO:0005515(protein binding);GO:0008353(RNA polymerase II carboxy-terminal domain kinase activity);GO:0048440(carpel development);GO:0048366(leaf development);GO:0006397(mRNA processing);GO:0050792(regulation of viral reproduction);GO:0009615(response to virus)
miR7760-p5_1	TRINITY_DN18429_c0_g1	TRINITY_DN18429_c0_g1	-	3.5	457-474	1
miR7760-p5_1	TRINITY_DN13190_c0_g2	TRINITY_DN13190_c0_g2	sp|P47226|TES_MOUSE Testin OS=Mus musculus GN=Tes PE=1 SV=1	3.5	508-525	1	GO:0005737(cytoplasm);GO:0005925(focal adhesion);GO:0008270(zinc ion binding);GO:0008285(negative regulation of cell proliferation)
miR7760-p5_1	TRINITY_DN22924_c0_g1	TRINITY_DN22924_c0_g1	sp|Q9M1S8|GCP2_ARATH Probable glutamate carboxypeptidase 2 OS=Arabidopsis thaliana GN=AMP1 PE=1 SV=3	3.5	84-101	1	GO:0016021(integral to membrane);GO:0046872(metal ion binding);GO:0004181(metallocarboxypeptidase activity);GO:0009790(embryo development);GO:0009908(flower development);GO:0010305(leaf vascular tissue pattern formation);GO:0009640(photomorphogenesis);GO:0006508(proteolysis);GO:0010080(regulation of floral meristem growth);GO:0010081(regulation of inflorescence meristem growth);GO:0010082(regulat…
miR7760-p5_1	TRINITY_DN32436_c5_g2	TRINITY_DN32436_c5_g2	sp|F4I171|MD15A_ARATH Mediator of RNA polymerase II transcription subunit 15a OS=Arabidopsis thaliana GN=MED15A PE=1 SV=1	3.5	3338-3355	1
miR7760-p5_1	TRINITY_DN48413_c0_g1	TRINITY_DN48413_c0_g1	-	3.5	201-219	1
miR7760-p5_1	TRINITY_DN26371_c1_g1	TRINITY_DN26371_c1_g1	sp|Q8LPN7|RNG1L_ARATH E3 ubiquitin-protein ligase RING1-like OS=Arabidopsis thaliana GN=At3g19950 PE=2 SV=1	3.5	1879-1896	1	GO:0016874(ligase activity);GO:0008270(zinc ion binding)
miR7760-p5_1	TRINITY_DN22527_c0_g1	TRINITY_DN22527_c0_g1	-	3.5	864-881	1
miR7760-p5_1	TRINITY_DN34067_c0_g1	TRINITY_DN34067_c0_g1	-	3.5	980-997	1
miR7760-p5_1	TRINITY_DN3971_c0_g2	TRINITY_DN3971_c0_g2	-	3.5	927-944	1
miR7760-p5_1	TRINITY_DN3389_c0_g1	TRINITY_DN3389_c0_g1	-	3.5	130-147	1
miR7760-p5_1	TRINITY_DN24705_c1_g1	TRINITY_DN24705_c1_g1	sp|Q94C69|CSP3_ARATH Cold shock domain-containing protein 3 OS=Arabidopsis thaliana GN=CSP3 PE=2 SV=1	3.5	494-511	1
miR7760-p5_1	TRINITY_DN30471_c0_g1	TRINITY_DN30471_c0_g1	-	3.5	3741-3758	1
miR7760-p5_1	TRINITY_DN25635_c0_g1	TRINITY_DN25635_c0_g1	sp|Q9SYM2|STHY_ARATH Probable salt tolerance-like protein At1g78600 OS=Arabidopsis thaliana GN=At1g78600 PE=1 SV=2	3.5	1167-1184	1	GO:0016607(nuclear speck);GO:0005515(protein binding);GO:0008270(zinc ion binding);GO:0009718(anthocyanin biosynthetic process);GO:0015995(chlorophyll biosynthetic process);GO:0009658(chloroplast organization);GO:0010099(regulation of photomorphogenesis);GO:0006355(regulation of transcription, DNA-dependent);GO:0009641(shade avoidance)
miR7760-p5_1	TRINITY_DN19020_c0_g1	TRINITY_DN19020_c0_g1	-	3.5	1297-1314	1
miR7760-p5_1	TRINITY_DN19312_c1_g1	TRINITY_DN19312_c1_g1	sp|O81126|RZP22_ARATH Serine/arginine-rich splicing factor RSZ22 OS=Arabidopsis thaliana GN=RSZ22 PE=1 SV=1	3.5	1890-1907	1
miR7760-p5_1	TRINITY_DN32435_c2_g1	TRINITY_DN32435_c2_g1	sp|Q9LK03|PERK2_ARATH Proline-rich receptor-like protein kinase PERK2 OS=Arabidopsis thaliana GN=PERK2 PE=2 SV=3	3.5	187-205	1	GO:0016021(integral to membrane);GO:0005886(plasma membrane);GO:0005524(ATP binding);GO:0004674(protein serine/threonine kinase activity);GO:0004872(receptor activity)
miR7760-p5_1	TRINITY_DN22827_c0_g1	TRINITY_DN22827_c0_g1	sp|Q6AWY4|GRF5_ORYSJ Growth-regulating factor 5 OS=Oryza sativa subsp. japonica GN=GRF5 PE=2 SV=1	3.5	1233-1250	1
miR7760-p5_1	TRINITY_DN30656_c0_g1	TRINITY_DN30656_c0_g1	sp|Q9SX31|PERK9_ARATH Proline-rich receptor-like protein kinase PERK9 OS=Arabidopsis thaliana GN=PERK9 PE=2 SV=1	3.5	1484-1501	1	GO:0016021(integral to membrane);GO:0005886(plasma membrane);GO:0005524(ATP binding);GO:0004674(protein serine/threonine kinase activity)
miR7760-p5_1	TRINITY_DN17529_c0_g2	TRINITY_DN17529_c0_g2	sp|Q8R317|UBQL1_MOUSE Ubiquilin-1 OS=Mus musculus GN=Ubqln1 PE=1 SV=1	3.5	2003-2020	1	GO:0005783(endoplasmic reticulum);GO:0005634(nucleus);GO:0048471(perinuclear region of cytoplasm);GO:0000502(proteasome complex);GO:0019215(intermediate filament binding);GO:0019900(kinase binding);GO:0005102(receptor binding);GO:0006915(apoptosis);GO:0031396(regulation of protein ubiquitination);GO:0001666(response to hypoxia)
miR7760-p5_1	TRINITY_DN30361_c1_g1	TRINITY_DN30361_c1_g1	sp|O22478|IMA_SOLLC Importin subunit alpha OS=Solanum lycopersicum PE=2 SV=2	3.5	2207-2224	1	GO:0005737(cytoplasm);GO:0005643(nuclear pore);GO:0005488(binding);GO:0008565(protein transporter activity);GO:0006606(protein import into nucleus)
miR7760-p5_1	TRINITY_DN30361_c1_g2	TRINITY_DN30361_c1_g2	sp|O22478|IMA_SOLLC Importin subunit alpha OS=Solanum lycopersicum PE=2 SV=2	3.5	2207-2224	1	GO:0005737(cytoplasm);GO:0005643(nuclear pore);GO:0005488(binding);GO:0008565(protein transporter activity);GO:0006606(protein import into nucleus)
miR7760-p5_1	TRINITY_DN21301_c0_g2	TRINITY_DN21301_c0_g2	sp|P34066|PSA1A_ARATH Proteasome subunit alpha type-1-A OS=Arabidopsis thaliana GN=PAF1 PE=1 SV=3	3.5	1251-1268	1	GO:0005829(cytosol);GO:0005634(nucleus);GO:0005886(plasma membrane);GO:0019773(proteasome core complex, alpha-subunit complex);GO:0004298(threonine-type endopeptidase activity);GO:0046685(response to arsenic-containing substance);GO:0006511(ubiquitin-dependent protein catabolic process)	ko03050(Proteasome)
miR7760-p5_1	TRINITY_DN21301_c0_g4	TRINITY_DN21301_c0_g4	sp|P34066|PSA1A_ARATH Proteasome subunit alpha type-1-A OS=Arabidopsis thaliana GN=PAF1 PE=1 SV=3	3.5	1251-1268	1	GO:0005829(cytosol);GO:0005634(nucleus);GO:0005886(plasma membrane);GO:0019773(proteasome core complex, alpha-subunit complex);GO:0004298(threonine-type endopeptidase activity);GO:0046685(response to arsenic-containing substance);GO:0006511(ubiquitin-dependent protein catabolic process)	ko03050(Proteasome)
miR7760-p5_1	TRINITY_DN21301_c0_g3	TRINITY_DN21301_c0_g3	sp|P34066|PSA1A_ARATH Proteasome subunit alpha type-1-A OS=Arabidopsis thaliana GN=PAF1 PE=1 SV=3	3.5	1251-1268	1	GO:0005829(cytosol);GO:0005634(nucleus);GO:0005886(plasma membrane);GO:0019773(proteasome core complex, alpha-subunit complex);GO:0004298(threonine-type endopeptidase activity);GO:0046685(response to arsenic-containing substance);GO:0006511(ubiquitin-dependent protein catabolic process)	ko03050(Proteasome)
miR7760-p5_1	TRINITY_DN21301_c0_g1	TRINITY_DN21301_c0_g1	sp|P34066|PSA1A_ARATH Proteasome subunit alpha type-1-A OS=Arabidopsis thaliana GN=PAF1 PE=1 SV=3	3.5	1251-1268	1	GO:0005829(cytosol);GO:0005634(nucleus);GO:0005886(plasma membrane);GO:0019773(proteasome core complex, alpha-subunit complex);GO:0004298(threonine-type endopeptidase activity);GO:0046685(response to arsenic-containing substance);GO:0006511(ubiquitin-dependent protein catabolic process)	ko03050(Proteasome)
miR7760-p5_1	TRINITY_DN3069_c78_g1	TRINITY_DN3069_c78_g1	-	3.5	147-164	1
miR7760-p5_1	TRINITY_DN31940_c92_g1	TRINITY_DN31940_c92_g1	sp|Q9LK03|PERK2_ARATH Proline-rich receptor-like protein kinase PERK2 OS=Arabidopsis thaliana GN=PERK2 PE=2 SV=3	3.5	288-305	1	GO:0016021(integral to membrane);GO:0005886(plasma membrane);GO:0005524(ATP binding);GO:0004674(protein serine/threonine kinase activity);GO:0004872(receptor activity)
miR7760-p5_1	TRINITY_DN11403_c0_g1	TRINITY_DN11403_c0_g1	sp|Q41188|CSP2_ARATH Cold shock protein 2 OS=Arabidopsis thaliana GN=CSP2 PE=1 SV=1	3.5	812-829	1
miR7760-p5_1	TRINITY_DN32236_c2_g20	TRINITY_DN32236_c2_g20	-	3.5	138-155	1
miR7760-p5_1	TRINITY_DN18467_c0_g1	TRINITY_DN18467_c0_g1	sp|Q681X4|ZAT5_ARATH Zinc finger protein ZAT5 OS=Arabidopsis thaliana GN=ZAT5 PE=2 SV=1	3.5	909-926	1	GO:0005634(nucleus);GO:0003676(nucleic acid binding);GO:0008270(zinc ion binding);GO:0006355(regulation of transcription, DNA-dependent);GO:0006351(transcription, DNA-dependent)
miR7760-p5_1	TRINITY_DN19742_c0_g2	TRINITY_DN19742_c0_g2	-	3.5	444-461	1
miR7760-p5_1	TRINITY_DN19742_c0_g1	TRINITY_DN19742_c0_g1	-	3.5	438-455	1
miR7760-p5_1	TRINITY_DN11403_c0_g1	TRINITY_DN11403_c0_g1	sp|Q41188|CSP2_ARATH Cold shock protein 2 OS=Arabidopsis thaliana GN=CSP2 PE=1 SV=1	3.5	674-691	1
miR7760-p5_1	TRINITY_DN31987_c1_g3	TRINITY_DN31987_c1_g3	-	4	142-159	1
miR7760-p5_1	TRINITY_DN41553_c0_g2	TRINITY_DN41553_c0_g2	-	4	110-127	1
miR7760-p5_1	TRINITY_DN41553_c0_g1	TRINITY_DN41553_c0_g1	-	4	110-127	1
miR7760-p5_1	TRINITY_DN31987_c1_g16	TRINITY_DN31987_c1_g16	-	4	145-162	1
miR7760-p5_1	TRINITY_DN4617_c0_g1	TRINITY_DN4617_c0_g1	sp|Q42434|BIP_SPIOL Luminal-binding protein OS=Spinacia oleracea GN=HSC70 PE=2 SV=1	4	185-202	1	GO:0005788(endoplasmic reticulum lumen);GO:0005524(ATP binding)
miR7760-p5_1	TRINITY_DN31987_c1_g2	TRINITY_DN31987_c1_g2	-	4	54-71	1
miR7760-p5_1	TRINITY_DN32541_c0_g3	TRINITY_DN32541_c0_g3	-	4	77-94	1
miR7760-p5_1	TRINITY_DN17355_c0_g1	TRINITY_DN17355_c0_g1	-	4	231-248	1
miR7760-p5_1	TRINITY_DN40350_c0_g1	TRINITY_DN40350_c0_g1	sp|Q9LV52|HSFC1_ARATH Heat stress transcription factor C-1 OS=Arabidopsis thaliana GN=HSFC1 PE=2 SV=1	4	114-132	1	GO:0005634(nucleus);GO:0043565(sequence-specific DNA binding);GO:0003700(sequence-specific DNA binding transcription factor activity);GO:0006950(response to stress)
miR7760-p5_1	TRINITY_DN48124_c0_g1	TRINITY_DN48124_c0_g1	-	4	74-91	1
miR7760-p5_1	TRINITY_DN19027_c0_g25	TRINITY_DN19027_c0_g25	-	4	28-45	1
miR7760-p5_1	TRINITY_DN19027_c0_g8	TRINITY_DN19027_c0_g8	-	4	28-45	1
miR7760-p5_1	TRINITY_DN19027_c0_g17	TRINITY_DN19027_c0_g17	-	4	28-45	1
miR7760-p5_1	TRINITY_DN31987_c1_g4	TRINITY_DN31987_c1_g4	-	4	54-71	1
miR7760-p5_1	TRINITY_DN19027_c0_g11	TRINITY_DN19027_c0_g11	-	4	28-45	1
miR7760-p5_1	TRINITY_DN31987_c1_g14	TRINITY_DN31987_c1_g14	-	4	88-105	1
miR7760-p5_1	TRINITY_DN49581_c0_g1	TRINITY_DN49581_c0_g1	-	4	138-155	1
miR7760-p5_1	TRINITY_DN19027_c0_g29	TRINITY_DN19027_c0_g29	-	4	28-45	1
miR7760-p5_1	TRINITY_DN37133_c0_g1	TRINITY_DN37133_c0_g1	-	4	38-55	1
miR7760-p5_1	TRINITY_DN19027_c0_g3	TRINITY_DN19027_c0_g3	-	4	28-45	1
miR7760-p5_1	TRINITY_DN19027_c0_g26	TRINITY_DN19027_c0_g26	-	4	28-45	1
miR7760-p5_1	TRINITY_DN19027_c0_g21	TRINITY_DN19027_c0_g21	-	4	28-45	1
miR7760-p5_1	TRINITY_DN19027_c0_g13	TRINITY_DN19027_c0_g13	sp|Q7G6K7|FH3_ORYSJ Formin-like protein 3 OS=Oryza sativa subsp. japonica GN=FH3 PE=2 SV=2	4	28-45	1	GO:0003779(actin binding);GO:0004721(phosphoprotein phosphatase activity);GO:0030036(actin cytoskeleton organization)
miR7760-p5_1	TRINITY_DN19027_c0_g15	TRINITY_DN19027_c0_g15	-	4	28-45	1
miR7760-p5_1	TRINITY_DN19027_c0_g18	TRINITY_DN19027_c0_g18	-	4	28-45	1
miR7760-p5_1	TRINITY_DN19027_c0_g12	TRINITY_DN19027_c0_g12	-	4	28-45	1
miR7760-p5_1	TRINITY_DN19027_c0_g6	TRINITY_DN19027_c0_g6	-	4	28-45	1
miR7760-p5_1	TRINITY_DN32904_c2_g7	TRINITY_DN32904_c2_g7	-	4	58-75	1
miR7760-p5_1	TRINITY_DN19027_c0_g23	TRINITY_DN19027_c0_g23	-	4	28-45	1
miR7760-p5_1	TRINITY_DN19027_c0_g9	TRINITY_DN19027_c0_g9	-	4	28-45	1
miR7760-p5_1	TRINITY_DN19027_c0_g10	TRINITY_DN19027_c0_g10	-	4	28-45	1
miR7760-p5_1	TRINITY_DN19027_c0_g2	TRINITY_DN19027_c0_g2	-	4	28-45	1
miR7760-p5_1	TRINITY_DN19027_c0_g1	TRINITY_DN19027_c0_g1	-	4	28-45	1
miR7760-p5_1	TRINITY_DN19742_c0_g1	TRINITY_DN19742_c0_g1	-	4	498-515	1
miR7760-p5_1	TRINITY_DN19742_c0_g2	TRINITY_DN19742_c0_g2	-	4	504-521	1
miR7760-p5_1	TRINITY_DN32904_c2_g39	TRINITY_DN32904_c2_g39	-	4	58-75	1
miR7760-p5_1	TRINITY_DN15344_c0_g1	TRINITY_DN15344_c0_g1	sp|Q08632|SDR1_PICAB Short-chain type dehydrogenase/reductase OS=Picea abies PE=2 SV=1	4	427-444	1	GO:0005488(binding);GO:0016491(oxidoreductase activity)	ko00061(Fatty acid biosynthesis);ko01040(Biosynthesis of unsaturated fatty acids)
miR7760-p5_1	TRINITY_DN21228_c0_g2	TRINITY_DN21228_c0_g2	-	4	52-69	1
miR7760-p5_1	TRINITY_DN6298_c0_g2	TRINITY_DN6298_c0_g2	sp|Q9SX31|PERK9_ARATH Proline-rich receptor-like protein kinase PERK9 OS=Arabidopsis thaliana GN=PERK9 PE=2 SV=1	4	476-493	1	GO:0016021(integral to membrane);GO:0005886(plasma membrane);GO:0005524(ATP binding);GO:0004674(protein serine/threonine kinase activity)
miR7760-p5_1	TRINITY_DN23293_c0_g1	TRINITY_DN23293_c0_g1	-	4	203-220	1
miR7760-p5_1	TRINITY_DN32904_c2_g4	TRINITY_DN32904_c2_g4	-	4	58-75	1
miR7760-p5_1	TRINITY_DN5785_c0_g1	TRINITY_DN5785_c0_g1	sp|Q2H720|DBP2_CHAGB ATP-dependent RNA helicase DBP2 OS=Chaetomium globosum (strain ATCC 6205 / CBS 148.51 / DSM 1962 / NBRC 6347 / NRRL 1970) GN=DBP2 PE=3 SV=1	4	219-236	1	GO:0005737(cytoplasm);GO:0005634(nucleus);GO:0005524(ATP binding);GO:0008026(ATP-dependent helicase activity);GO:0003723(RNA binding);GO:0000184(nuclear-transcribed mRNA catabolic process, nonsense-mediated decay);GO:0006364(rRNA processing)
miR7760-p5_1	TRINITY_DN42257_c0_g1	TRINITY_DN42257_c0_g1	-	4	156-172	1
miR7760-p5_1	TRINITY_DN21228_c0_g4	TRINITY_DN21228_c0_g4	-	4	52-69	1
miR7760-p5_1	TRINITY_DN12113_c0_g1	TRINITY_DN12113_c0_g1	-	4	100-117	1
miR7760-p5_1	TRINITY_DN15859_c2_g1	TRINITY_DN15859_c2_g1	-	4	87-104	1
miR7760-p5_1	TRINITY_DN21228_c0_g1	TRINITY_DN21228_c0_g1	sp|O15047|SET1A_HUMAN Histone-lysine N-methyltransferase SETD1A OS=Homo sapiens GN=SETD1A PE=1 SV=3	4	52-69	1	GO:0005694(chromosome);GO:0016607(nuclear speck);GO:0048188(Set1C/COMPASS complex);GO:0042800(histone methyltransferase activity );GO:0000166(nucleotide binding);GO:0005515(protein binding);GO:0003723(RNA binding);GO:0006355(regulation of transcription, DNA-dependent);GO:0006351(transcription, DNA-dependent)
miR7760-p5_1	TRINITY_DN21228_c0_g3	TRINITY_DN21228_c0_g3	-	4	52-69	1
miR7760-p5_1	TRINITY_DN32904_c2_g2	TRINITY_DN32904_c2_g2	-	4	58-75	1
miR7760-p5_1	TRINITY_DN31987_c1_g10	TRINITY_DN31987_c1_g10	-	4	257-274	1
miR7760-p5_1	TRINITY_DN32904_c2_g37	TRINITY_DN32904_c2_g37	-	4	58-75	1
miR7760-p5_1	TRINITY_DN28367_c0_g1	TRINITY_DN28367_c0_g1	sp|Q9S7R7|Y3903_ARATH BTB/POZ domain-containing protein At3g09030 OS=Arabidopsis thaliana GN=At3g09030 PE=2 SV=1	4	452-469	1	GO:0008076(voltage-gated potassium channel complex);GO:0005249(voltage-gated potassium channel activity)
miR7760-p5_1	TRINITY_DN10938_c1_g1	TRINITY_DN10938_c1_g1	sp|Q9FYF7|Y1736_ARATH REF/SRPP-like protein At1g67360 OS=Arabidopsis thaliana GN=At1g67360 PE=2 SV=1	4	798-815	1	GO:0005773(vacuole)
miR7760-p5_1	TRINITY_DN41519_c0_g1	TRINITY_DN41519_c0_g1	-	4	439-456	1
miR7760-p5_1	TRINITY_DN7344_c0_g1	TRINITY_DN7344_c0_g1	sp|Q9SX31|PERK9_ARATH Proline-rich receptor-like protein kinase PERK9 OS=Arabidopsis thaliana GN=PERK9 PE=2 SV=1	4	48-65	1	GO:0016021(integral to membrane);GO:0005886(plasma membrane);GO:0005524(ATP binding);GO:0004674(protein serine/threonine kinase activity)
miR7760-p5_1	TRINITY_DN19027_c0_g5	TRINITY_DN19027_c0_g5	-	4	28-45	1
miR7760-p5_1	TRINITY_DN19027_c0_g14	TRINITY_DN19027_c0_g14	-	4	28-45	1
miR7760-p5_1	TRINITY_DN27995_c0_g1	TRINITY_DN27995_c0_g1	sp|B9GXD6|CSPLO_POPTR CASP-like protein POPTRDRAFT_553757 OS=Populus trichocarpa GN=POPTRDRAFT_553757 PE=3 SV=1	4	753-770	1	GO:0016021(integral to membrane);GO:0005886(plasma membrane)
miR7760-p5_1	TRINITY_DN19027_c0_g24	TRINITY_DN19027_c0_g24	-	4	28-45	1
miR7760-p5_1	TRINITY_DN19027_c0_g7	TRINITY_DN19027_c0_g7	-	4	28-45	1
miR7760-p5_1	TRINITY_DN19027_c0_g16	TRINITY_DN19027_c0_g16	-	4	28-45	1
miR7760-p5_1	TRINITY_DN32645_c0_g1	TRINITY_DN32645_c0_g1	sp|Q9FDW1|MYB44_ARATH Transcription factor MYB44 OS=Arabidopsis thaliana GN=MYB44 PE=2 SV=1	4	1614-1631	1	GO:0005634(nucleus);GO:0003677(DNA binding);GO:0009738(abscisic acid mediated signaling pathway);GO:0006355(regulation of transcription, DNA-dependent);GO:0009733(response to auxin stimulus);GO:0046686(response to cadmium ion);GO:0010200(response to chitin);GO:0009723(response to ethylene stimulus);GO:0009739(response to gibberellin stimulus);GO:0009753(response to jasmonic acid stimulus);GO:0009…
miR7760-p5_1	TRINITY_DN101_c0_g1	TRINITY_DN101_c0_g1	sp|Q5EAE9|ATL43_ARATH RING-H2 finger protein ATL43 OS=Arabidopsis thaliana GN=ATL43 PE=2 SV=2	4	420-437	1	GO:0016021(integral to membrane);GO:0008270(zinc ion binding)
miR7760-p5_1	TRINITY_DN26488_c0_g2	TRINITY_DN26488_c0_g2	sp|Q2VZE7|APAG_MAGSA Protein ApaG OS=Magnetospirillum magneticum (strain AMB-1 / ATCC 700264) GN=apaG PE=3 SV=1	4	988-1005	1
miR7760-p5_1	TRINITY_DN15381_c0_g1	TRINITY_DN15381_c0_g1	-	4	68-85	1
miR7760-p5_1	TRINITY_DN25871_c1_g1	TRINITY_DN25871_c1_g1	sp|Q9LK03|PERK2_ARATH Proline-rich receptor-like protein kinase PERK2 OS=Arabidopsis thaliana GN=PERK2 PE=2 SV=3	4	715-732	1	GO:0016021(integral to membrane);GO:0005886(plasma membrane);GO:0005524(ATP binding);GO:0004674(protein serine/threonine kinase activity);GO:0004872(receptor activity)	ko04622(RIG-I-like receptor signaling pathway)
miR7760-p5_1	TRINITY_DN30589_c0_g1	TRINITY_DN30589_c0_g1	-	4	1393-1410	1
miR7760-p5_1	TRINITY_DN11103_c0_g1	TRINITY_DN11103_c0_g1	-	4	244-261	1
miR7760-p5_1	TRINITY_DN25108_c0_g1	TRINITY_DN25108_c0_g1	sp|Q6DR24|Y3795_ARATH Uncharacterized protein At3g17950 OS=Arabidopsis thaliana GN=Y-3 PE=1 SV=1	4	282-299	1
miR7760-p5_1	TRINITY_DN29390_c1_g1	TRINITY_DN29390_c1_g1	sp|Q6EU30|Y2835_ORYSJ B3 domain-containing protein Os02g0683500 OS=Oryza sativa subsp. japonica GN=Os02g0683500 PE=2 SV=1	4	1156-1173	1	GO:0005634(nucleus);GO:0003677(DNA binding);GO:0006355(regulation of transcription, DNA-dependent);GO:0006351(transcription, DNA-dependent)
miR7760-p5_1	TRINITY_DN40128_c0_g1	TRINITY_DN40128_c0_g1	-	4	281-298	1
miR7760-p5_1	TRINITY_DN30238_c0_g1	TRINITY_DN30238_c0_g1	sp|Q9SKU6|PP166_ARATH Pentatricopeptide repeat-containing protein At2g20710, mitochondrial OS=Arabidopsis thaliana GN=At2g20710 PE=2 SV=1	4	820-837	1	GO:0005739(mitochondrion);GO:0005488(binding)
miR7760-p5_1	TRINITY_DN30963_c0_g1	TRINITY_DN30963_c0_g1	sp|O94631|MRM1_SCHPO rRNA methyltransferase, mitochondrial OS=Schizosaccharomyces pombe (strain 972 / ATCC 24843) GN=mrm1 PE=3 SV=1	4	548-565	1	GO:0005783(endoplasmic reticulum);GO:0005739(mitochondrion);GO:0003723(RNA binding);GO:0008989(rRNA )
miR7760-p5_1	TRINITY_DN2826_c0_g1	TRINITY_DN2826_c0_g1	sp|Q9C660|PEK10_ARATH Proline-rich receptor-like protein kinase PERK10 OS=Arabidopsis thaliana GN=PERK10 PE=1 SV=2	4	701-718	1	GO:0016021(integral to membrane);GO:0005886(plasma membrane);GO:0005524(ATP binding);GO:0004674(protein serine/threonine kinase activity)
miR7760-p5_1	TRINITY_DN2826_c0_g2	TRINITY_DN2826_c0_g2	-	4	701-718	1
miR7760-p5_1	TRINITY_DN2826_c0_g3	TRINITY_DN2826_c0_g3	sp|Q9C660|PEK10_ARATH Proline-rich receptor-like protein kinase PERK10 OS=Arabidopsis thaliana GN=PERK10 PE=1 SV=2	4	701-718	1	GO:0016021(integral to membrane);GO:0005886(plasma membrane);GO:0005524(ATP binding);GO:0004674(protein serine/threonine kinase activity)
miR7760-p5_1	TRINITY_DN27226_c1_g1	TRINITY_DN27226_c1_g1	-	4	1895-1912	1
miR7760-p5_1	TRINITY_DN23546_c0_g1	TRINITY_DN23546_c0_g1	sp|Q03685|BIP5_TOBAC Luminal-binding protein 5 OS=Nicotiana tabacum GN=BIP5 PE=2 SV=1	4	838-855	1	GO:0005788(endoplasmic reticulum lumen);GO:0005524(ATP binding)	ko03060(Protein export)
miR7760-p5_1	TRINITY_DN23813_c0_g1	TRINITY_DN23813_c0_g1	sp|Q43848|TKTC_SOLTU Transketolase, chloroplastic OS=Solanum tuberosum PE=2 SV=1	4	2344-2361	1	GO:0009535(chloroplast thylakoid membrane);GO:0046872(metal ion binding);GO:0004802(transketolase activity)	ko00030(Pentose phosphate pathway);ko00710(Carbon fixation in photosynthetic organisms);ko01051(Biosynthesis of ansamycins)
miR7760-p5_1	TRINITY_DN17133_c0_g1	TRINITY_DN17133_c0_g1	-	4	391-408	1
miR7760-p5_1	TRINITY_DN23119_c0_g1	TRINITY_DN23119_c0_g1	-	4	344-361	1
miR7760-p5_1	TRINITY_DN30745_c2_g4	TRINITY_DN30745_c2_g4	sp|Q6ZPY7|KDM3B_MOUSE Lysine-specific demethylase 3B OS=Mus musculus GN=Kdm3b PE=1 SV=2	4	2043-2060	1	GO:0005634(nucleus);GO:0046872(metal ion binding);GO:0016702(oxidoreductase activity, acting on single donors with incorporation of molecular oxygen, incorporation of two atoms of oxygen);GO:0016568(chromatin modification);GO:0006355(regulation of transcription, DNA-dependent);GO:0006351(transcription, DNA-dependent)
miR7760-p5_1	TRINITY_DN11381_c0_g1	TRINITY_DN11381_c0_g1	-	4	2276-2293	1
miR7760-p5_1	TRINITY_DN16212_c0_g2	TRINITY_DN16212_c0_g2	sp|Q9LSS5|ICR3_ARATH Interactor of constitutive active ROPs 3 OS=Arabidopsis thaliana GN=ICR3 PE=2 SV=1	4	716-733	1	GO:0005886(plasma membrane)
miR7760-p5_1	TRINITY_DN16212_c0_g3	TRINITY_DN16212_c0_g3	sp|Q9LSS5|ICR3_ARATH Interactor of constitutive active ROPs 3 OS=Arabidopsis thaliana GN=ICR3 PE=2 SV=1	4	716-733	1	GO:0005886(plasma membrane)
miR7760-p5_1	TRINITY_DN20249_c0_g1	TRINITY_DN20249_c0_g1	sp|Q9C518|TCP8_ARATH Transcription factor TCP8 OS=Arabidopsis thaliana GN=TCP8 PE=2 SV=1	4	672-689	1	GO:0005634(nucleus);GO:0001047(core promoter binding);GO:0006355(regulation of transcription, DNA-dependent);GO:0006351(transcription, DNA-dependent)
miR7760-p5_1	TRINITY_DN16212_c0_g1	TRINITY_DN16212_c0_g1	sp|Q9LSS5|ICR3_ARATH Interactor of constitutive active ROPs 3 OS=Arabidopsis thaliana GN=ICR3 PE=2 SV=1	4	716-733	1	GO:0005886(plasma membrane)
miR7760-p5_1	TRINITY_DN13926_c0_g1	TRINITY_DN13926_c0_g1	-	4	771-788	1
miR7760-p5_1	TRINITY_DN2826_c0_g4	TRINITY_DN2826_c0_g4	sp|Q9C660|PEK10_ARATH Proline-rich receptor-like protein kinase PERK10 OS=Arabidopsis thaliana GN=PERK10 PE=1 SV=2	4	701-718	1	GO:0016021(integral to membrane);GO:0005886(plasma membrane);GO:0005524(ATP binding);GO:0004674(protein serine/threonine kinase activity)
miR7760-p5_1	TRINITY_DN19491_c0_g1	TRINITY_DN19491_c0_g1	sp|Q9SZE8|LBD39_ARATH LOB domain-containing protein 39 OS=Arabidopsis thaliana GN=LBD39 PE=2 SV=1	4	498-515	1
miR7760-p5_1	TRINITY_DN22158_c0_g1	TRINITY_DN22158_c0_g1	sp|E1U332|ALL12_OLEEU Isoflavone reductase-like protein OS=Olea europaea PE=1 SV=1	4	762-779	1		ko00351(1,ko1,ko1-Trichloro-2,ko2-bis);ko00364(Fluorobenzoate degradation);ko00628(Fluorene degradation);ko00640(Propanoate metabolism)
miR7760-p5_1	TRINITY_DN31209_c1_g2	TRINITY_DN31209_c1_g2	sp|Q9SB63|MOS1_ARATH Protein MODIFIER OF SNC1 1 OS=Arabidopsis thaliana GN=MOS1 PE=1 SV=2	4	3658-3675	1	GO:0016568(chromatin modification);GO:0040029(regulation of gene expression, epigenetic)
miR7760-p5_1	TRINITY_DN18467_c0_g1	TRINITY_DN18467_c0_g1	sp|Q681X4|ZAT5_ARATH Zinc finger protein ZAT5 OS=Arabidopsis thaliana GN=ZAT5 PE=2 SV=1	4	831-848	1	GO:0005634(nucleus);GO:0003676(nucleic acid binding);GO:0008270(zinc ion binding);GO:0006355(regulation of transcription, DNA-dependent);GO:0006351(transcription, DNA-dependent)
miR7760-p5_1	TRINITY_DN31452_c0_g1	TRINITY_DN31452_c0_g1	sp|P45726|PALY_CAMSI Phenylalanine ammonia-lyase OS=Camellia sinensis GN=PAL PE=2 SV=1	4	2256-2273	1	GO:0005737(cytoplasm);GO:0016841(ammonia-lyase activity);GO:0009058(biosynthetic process);GO:0006559(L-phenylalanine catabolic process);GO:0009698(phenylpropanoid metabolic process)	ko00360(Phenylalanine metabolism);ko00910(Nitrogen metabolism);ko00940(Phenylpropanoid biosynthesis)
miR7760-p5_1	TRINITY_DN6894_c0_g1	TRINITY_DN6894_c0_g1	sp|Q9LZ56|DOF51_ARATH Dof zinc finger protein DOF5.1 OS=Arabidopsis thaliana GN=DOF5.1 PE=2 SV=1	4	619-636	1	GO:0005634(nucleus);GO:0003677(DNA binding);GO:0008270(zinc ion binding);GO:0006355(regulation of transcription, DNA-dependent);GO:0006351(transcription, DNA-dependent)
miR7760-p5_1	TRINITY_DN12631_c0_g1	TRINITY_DN12631_c0_g1	sp|Q9ZWA6|MGP_ARATH Zinc finger protein MAGPIE OS=Arabidopsis thaliana GN=MGP PE=1 SV=1	4	357-374	1	GO:0005634(nucleus);GO:0003677(DNA binding);GO:0005515(protein binding);GO:0008270(zinc ion binding);GO:0006355(regulation of transcription, DNA-dependent);GO:0006351(transcription, DNA-dependent)
miR7760-p5_1	TRINITY_DN15411_c0_g1	TRINITY_DN15411_c0_g1	sp|Q9LUG9|MD33A_ARATH Mediator of RNA polymerase II transcription subunit 33A OS=Arabidopsis thaliana GN=MED33A PE=1 SV=1	4	1457-1474	1
miR7760-p5_1	TRINITY_DN23538_c0_g1	TRINITY_DN23538_c0_g1	sp|Q7XA87|FOLT1_ARATH Folate transporter 1, chloroplastic OS=Arabidopsis thaliana GN=FOLT1 PE=2 SV=1	4	1543-1560	1
miR7760-p5_1	TRINITY_DN28797_c0_g1	TRINITY_DN28797_c0_g1	sp|Q39219|AOX1A_ARATH Ubiquinol oxidase 1a, mitochondrial OS=Arabidopsis thaliana GN=AOX1A PE=1 SV=2	4	1139-1156	1	GO:0016021(integral to membrane);GO:0005743(mitochondrial inner membrane);GO:0070469(respiratory chain);GO:0009916(alternative oxidase activity);GO:0046872(metal ion binding);GO:0045333(cellular respiration);GO:0022900(electron transport chain);GO:0031930(mitochondria-nucleus signaling pathway);GO:0007585(respiratory gaseous exchange);GO:0009409(response to cold);GO:0006810(transport)
miR7760-p5_1	TRINITY_DN31923_c2_g1	TRINITY_DN31923_c2_g1	-	4	5228-5245	1
miR7760-p5_1	TRINITY_DN24165_c0_g1	TRINITY_DN24165_c0_g1	-	4	1423-1440	1
miR7760-p5_1	TRINITY_DN23724_c0_g1	TRINITY_DN23724_c0_g1	sp|Q9CAC1|GUN8_ARATH Endoglucanase 8 OS=Arabidopsis thaliana GN=CEL1 PE=2 SV=1	4	1643-1660	1	GO:0009507(chloroplast);GO:0005576(extracellular region);GO:0008810(cellulase activity);GO:0042547(cell wall modification involved in multidimensional cell growth);GO:0007047(cellular cell wall organization);GO:0030245(cellulose catabolic process)	ko00500(Starch and sucrose metabolism)
miR7760-p5_1	TRINITY_DN12750_c0_g1	TRINITY_DN12750_c0_g1	-	4	393-410	1
miR7760-p5_1	TRINITY_DN27095_c0_g1	TRINITY_DN27095_c0_g1	sp|Q8H1D7|GTE5_ARATH Transcription factor GTE5, chloroplastic OS=Arabidopsis thaliana GN=GTE5 PE=1 SV=1	4	856-873	1	GO:0009507(chloroplast);GO:0005515(protein binding);GO:0006355(regulation of transcription, DNA-dependent);GO:0006351(transcription, DNA-dependent)
miR7760-p5_1	TRINITY_DN17057_c0_g2	TRINITY_DN17057_c0_g2	-	4	205-222	1
miR7760-p5_1	TRINITY_DN32014_c0_g1	TRINITY_DN32014_c0_g1	sp|F4I114|Y1960_ARATH Probable serine/threonine-protein kinase At1g09600 OS=Arabidopsis thaliana GN=At1g09600 PE=2 SV=1	4	2187-2204	1
miR7760-p5_1	TRINITY_DN32400_c2_g1	TRINITY_DN32400_c2_g1	sp|Q9SKZ1|PUR_ARATH Transcription factor Pur-alpha 1 OS=Arabidopsis thaliana GN=PURA1 PE=1 SV=2	4	1185-1202	1	GO:0005737(cytoplasm);GO:0005634(nucleus);GO:0003677(DNA binding);GO:0006355(regulation of transcription, DNA-dependent);GO:0046686(response to cadmium ion);GO:0006351(transcription, DNA-dependent)
miR7760-p5_1	TRINITY_DN32824_c0_g2	TRINITY_DN32824_c0_g2	-	4	2479-2496	1
miR7760-p5_1	TRINITY_DN1655_c0_g2	TRINITY_DN1655_c0_g2	-	4	267-284	1
miR7760-p5_1	TRINITY_DN1655_c0_g1	TRINITY_DN1655_c0_g1	-	4	267-284	1
miR7760-p5_1	TRINITY_DN10108_c0_g1	TRINITY_DN10108_c0_g1	sp|Q9M0R0|BH081_ARATH Transcription factor bHLH81 OS=Arabidopsis thaliana GN=BHLH81 PE=2 SV=1	4	954-971	1	GO:0005634(nucleus);GO:0003677(DNA binding);GO:0006355(regulation of transcription, DNA-dependent);GO:0006351(transcription, DNA-dependent)
miR7760-p5_1	TRINITY_DN20632_c0_g1	TRINITY_DN20632_c0_g1	sp|Q94G86|ALL9_OLEEU Glucan endo-1,3-beta-D-glucosidase OS=Olea europaea GN=OLE9 PE=1 SV=1	4	592-609	1
miR7760-p5_1	TRINITY_DN11430_c0_g1	TRINITY_DN11430_c0_g1	-	4	352-369	1
miR7760-p5_1	TRINITY_DN32435_c2_g9	TRINITY_DN32435_c2_g9	sp|Q9LK03|PERK2_ARATH Proline-rich receptor-like protein kinase PERK2 OS=Arabidopsis thaliana GN=PERK2 PE=2 SV=3	4	187-205	1	GO:0016021(integral to membrane);GO:0005886(plasma membrane);GO:0005524(ATP binding);GO:0004674(protein serine/threonine kinase activity);GO:0004872(receptor activity)	ko00270(Cysteine and methionine metabolism)
miR7760-p5_1	TRINITY_DN22480_c0_g1	TRINITY_DN22480_c0_g1	sp|Q9STN3|SPT51_ARATH Putative transcription elongation factor SPT5 homolog 1 OS=Arabidopsis thaliana GN=At4g08350 PE=1 SV=2	4	3021-3038	1	GO:0005634(nucleus);GO:0005840(ribosome);GO:0003735(structural constituent of ribosome);GO:0032968(positive regulation of transcription elongation from RNA polymerase II promoter);GO:0006351(transcription, DNA-dependent);GO:0006412(translation)
miR7760-p5_1	TRINITY_DN21704_c0_g1	TRINITY_DN21704_c0_g1	sp|Q56X72|RTNLS_ARATH Reticulon-like protein B21 OS=Arabidopsis thaliana GN=RTNLB21 PE=2 SV=2	4	1844-1861	1	GO:0005789(endoplasmic reticulum membrane);GO:0016021(integral to membrane)
miR7760-p5_1	TRINITY_DN12484_c0_g1	TRINITY_DN12484_c0_g1	sp|Q9FKP8|Y5541_ARATH ZF-HD homeobox protein At5g65410 OS=Arabidopsis thaliana GN=At5g65410 PE=1 SV=1	4	1163-1180	1	GO:0005634(nucleus);GO:0003677(DNA binding);GO:0008270(zinc ion binding);GO:0006355(regulation of transcription, DNA-dependent);GO:0006351(transcription, DNA-dependent)
miR7760-p5_1	TRINITY_DN29057_c0_g1	TRINITY_DN29057_c0_g1	sp|Q8GYL9|BRXL2_ARATH Protein Brevis radix-like 2 OS=Arabidopsis thaliana GN=BRXL2 PE=2 SV=1	4	1237-1254	1	GO:0005634(nucleus)
miR7760-p5_1	TRINITY_DN12615_c0_g1	TRINITY_DN12615_c0_g1	-	4	2010-2027	1
miR7760-p5_1	TRINITY_DN48585_c0_g1	TRINITY_DN48585_c0_g1	-	4	100-116	1
miR7760-p5_1	TRINITY_DN19178_c0_g1	TRINITY_DN19178_c0_g1	sp|Q9FWA4|GAUT9_ARATH Probable galacturonosyltransferase 9 OS=Arabidopsis thaliana GN=GAUT9 PE=2 SV=1	4	1019-1036	1	GO:0000139(Golgi membrane);GO:0016021(integral to membrane);GO:0016757(transferase activity, transferring glycosyl groups)	ko00051(Fructose and mannose metabolism)
miR7760-p5_1	TRINITY_DN30654_c0_g2	TRINITY_DN30654_c0_g2	sp|Q6DEL2|CLPT1_DANRE Cleft lip and palate transmembrane protein 1 homolog OS=Danio rerio GN=clptm1 PE=2 SV=1	4	2096-2113	1	GO:0016021(integral to membrane);GO:0030154(cell differentiation);GO:0007275(multicellular organismal development)
miR7760-p5_1	TRINITY_DN32624_c0_g1	TRINITY_DN32624_c0_g1	sp|Q84ZL0|FH5_ORYSJ Formin-like protein 5 OS=Oryza sativa subsp. japonica GN=FH5 PE=2 SV=2	4	4449-4466	1	GO:0003779(actin binding);GO:0004721(phosphoprotein phosphatase activity);GO:0030036(actin cytoskeleton organization)
miR7760-p5_1	TRINITY_DN25675_c0_g1	TRINITY_DN25675_c0_g1	sp|Q9LN22|PPR54_ARATH Pentatricopeptide repeat-containing protein At1g20300, mitochondrial OS=Arabidopsis thaliana GN=At1g20300 PE=2 SV=1	4	1826-1843	1	GO:0005739(mitochondrion);GO:0005488(binding)
miR7760-p5_1	TRINITY_DN20479_c0_g1	TRINITY_DN20479_c0_g1	sp|Q9LW32|PP258_ARATH Pentatricopeptide repeat-containing protein At3g26782, mitochondrial OS=Arabidopsis thaliana GN=PCMP-H34 PE=2 SV=1	4	2183-2200	1	GO:0005739(mitochondrion);GO:0005488(binding)
miR7760-p5_1	TRINITY_DN28990_c1_g2	TRINITY_DN28990_c1_g2	-	4	4896-4913	1
miR7760-p5_1	TRINITY_DN11654_c0_g1	TRINITY_DN11654_c0_g1	-	4	923-940	1
miR7760-p5_1	TRINITY_DN30317_c6_g1	TRINITY_DN30317_c6_g1	sp|Q9C757|INT2_ARATH Probable inositol transporter 2 OS=Arabidopsis thaliana GN=INT2 PE=1 SV=1	4	2036-2053	1	GO:0016021(integral to membrane);GO:0005886(plasma membrane);GO:0090406(pollen tube);GO:0005366(myo-inositol:hydrogen symporter activity);GO:0023052(signaling)
miR7760-p5_1	TRINITY_DN29334_c1_g1	TRINITY_DN29334_c1_g1	-	4	3452-3469	1
miR7760-p5_1	TRINITY_DN23819_c0_g2	TRINITY_DN23819_c0_g2	sp|Q9FGF8|ABR1_ARATH Ethylene-responsive transcription factor ABR1 OS=Arabidopsis thaliana GN=ABR1 PE=2 SV=1	4	1010-1027	1	GO:0005634(nucleus);GO:0003677(DNA binding);GO:0003700(sequence-specific DNA binding transcription factor activity);GO:0009738(abscisic acid mediated signaling pathway);GO:0050832(defense response to fungus);GO:0009873(ethylene mediated signaling pathway);GO:0009788(negative regulation of abscisic acid mediated signaling pathway);GO:0009749(response to glucose stimulus);GO:0006970(response to osm…
miR7760-p5_1	TRINITY_DN32435_c2_g4	TRINITY_DN32435_c2_g4	sp|Q9SX31|PERK9_ARATH Proline-rich receptor-like protein kinase PERK9 OS=Arabidopsis thaliana GN=PERK9 PE=2 SV=1	4	187-205	1	GO:0016021(integral to membrane);GO:0005886(plasma membrane);GO:0005524(ATP binding);GO:0004674(protein serine/threonine kinase activity)	ko00270(Cysteine and methionine metabolism)
miR7760-p5_1	TRINITY_DN19415_c0_g1	TRINITY_DN19415_c0_g1	sp|Q84M24|AB1A_ARATH ABC transporter A family member 1 OS=Arabidopsis thaliana GN=ABCA1 PE=2 SV=2	4	3073-3090	1	GO:0016021(integral to membrane);GO:0005774(vacuolar membrane);GO:0005524(ATP binding);GO:0016887(ATPase activity);GO:0006810(transport)	ko02010(ABC transporters)
miR7760-p5_1	TRINITY_DN21388_c0_g1	TRINITY_DN21388_c0_g1	sp|Q55467|CHLM_SYNY3 Magnesium-protoporphyrin O-methyltransferase OS=Synechocystis sp. (strain PCC 6803 / Kazusa) GN=chlM PE=3 SV=1	4	883-900	1	GO:0046406(magnesium protoporphyrin IX methyltransferase activity);GO:0015995(chlorophyll biosynthetic process);GO:0015979(photosynthesis)	ko00860(Porphyrin and chlorophyll metabolism)
miR7760-p5_1	TRINITY_DN27095_c0_g1	TRINITY_DN27095_c0_g1	sp|Q8H1D7|GTE5_ARATH Transcription factor GTE5, chloroplastic OS=Arabidopsis thaliana GN=GTE5 PE=1 SV=1	4	2211-2228	1	GO:0009507(chloroplast);GO:0005515(protein binding);GO:0006355(regulation of transcription, DNA-dependent);GO:0006351(transcription, DNA-dependent)
miR7760-p5_1	TRINITY_DN3971_c0_g2	TRINITY_DN3971_c0_g2	-	4	894-911	1
miR7782-3p_3	TRINITY_DN32823_c0_g8	TRINITY_DN32823_c0_g8	-	3	63-81	1
miR7782-3p_3	TRINITY_DN19183_c0_g1	TRINITY_DN19183_c0_g1	sp|Q56W08|PLCD3_ARATH Phosphoinositide phospholipase C 3 OS=Arabidopsis thaliana GN=PLC3 PE=2 SV=1	3	4-23	1	GO:0005886(plasma membrane);GO:0005509(calcium ion binding);GO:0004435(phosphatidylinositol phospholipase C activity);GO:0004871(signal transducer activity);GO:0035556(intracellular signal transduction);GO:0016042(lipid catabolic process)	ko00562(Inositol phosphate metabolism);ko04020(Calcium signaling pathway);ko04070(Phosphatidylinositol signaling system)
miR7782-3p_3	TRINITY_DN16714_c0_g1	TRINITY_DN16714_c0_g1	sp|Q8RWL0|E2FF_ARATH E2F transcription factor-like E2FF OS=Arabidopsis thaliana GN=E2FF PE=2 SV=1	3	1489-1507	1	GO:0005737(cytoplasm);GO:0005667(transcription factor complex);GO:0003677(DNA binding);GO:0003700(sequence-specific DNA binding transcription factor activity);GO:0007049(cell cycle)
miR7782-3p_3	TRINITY_DN31097_c0_g3	TRINITY_DN31097_c0_g3	-	3.5	260-278	1
miR7782-3p_3	TRINITY_DN32346_c0_g1	TRINITY_DN32346_c0_g1	sp|Q94FB9|AB1D_ARATH ABC transporter D family member 1 OS=Arabidopsis thaliana GN=ABCC1 PE=1 SV=1	3.5	561-579	1	GO:0046861(glyoxysomal membrane);GO:0009514(glyoxysome);GO:0016021(integral to membrane);GO:0005524(ATP binding);GO:0042626(ATPase activity, coupled to transmembrane movement of substances);GO:0005325(peroxisomal fatty-acyl-CoA transporter activity);GO:0010030(positive regulation of seed germination)	ko02010(ABC transporters);ko04146(Peroxisome)
miR7782-3p_3	TRINITY_DN31097_c0_g3	TRINITY_DN31097_c0_g3	-	3.5	206-224	1
miR7782-3p_3	TRINITY_DN31097_c0_g3	TRINITY_DN31097_c0_g3	-	3.5	152-170	1
miR7782-3p_3	TRINITY_DN32823_c0_g7	TRINITY_DN32823_c0_g7	-	4	7-25	1
miR7782-3p_3	TRINITY_DN14084_c0_g3	TRINITY_DN14084_c0_g3	-	4	44-63	1
miR7782-3p_3	TRINITY_DN44474_c0_g1	TRINITY_DN44474_c0_g1	-	4	118-137	1
miR7782-3p_3	TRINITY_DN32823_c0_g5	TRINITY_DN32823_c0_g5	-	4	7-25	1
miR7782-3p_3	TRINITY_DN14084_c0_g2	TRINITY_DN14084_c0_g2	-	4	44-63	1
miR7782-3p_3	TRINITY_DN2908_c0_g1	TRINITY_DN2908_c0_g1	-	4	146-164	1
miR7782-3p_3	TRINITY_DN22005_c0_g3	TRINITY_DN22005_c0_g3	-	4	185-203	1
miR7782-3p_3	TRINITY_DN32823_c0_g4	TRINITY_DN32823_c0_g4	-	4	241-259	1
miR7782-3p_3	TRINITY_DN14084_c0_g1	TRINITY_DN14084_c0_g1	-	4	44-63	1
miR7782-3p_3	TRINITY_DN32823_c0_g6	TRINITY_DN32823_c0_g6	-	4	243-261	1
miR7782-3p_3	TRINITY_DN32823_c0_g2	TRINITY_DN32823_c0_g2	-	4	7-25	1
miR7782-3p_3	TRINITY_DN19437_c0_g2	TRINITY_DN19437_c0_g2	sp|Q9SDZ9|PPAF2_IPOBA Purple acid phosphatase 2 OS=Ipomoea batatas GN=PAP2 PE=1 SV=1	4	758-776	1	GO:0005576(extracellular region);GO:0003993(acid phosphatase activity);GO:0046872(metal ion binding)
miR7782-3p_3	TRINITY_DN44147_c0_g1	TRINITY_DN44147_c0_g1	sp|Q9C996|GLIP6_ARATH GDSL esterase/lipase 6 OS=Arabidopsis thaliana GN=GLIP6 PE=2 SV=1	4	301-318	1	GO:0005576(extracellular region);GO:0016788(hydrolase activity, acting on ester bonds);GO:0016042(lipid catabolic process)
miR7782-3p_3	TRINITY_DN19007_c0_g2	TRINITY_DN19007_c0_g2	-	4	21-39	1
miR7782-3p_3	TRINITY_DN27632_c0_g1	TRINITY_DN27632_c0_g1	sp|Q2MY56|PATD2_SOLTU Patatin group D-2 OS=Solanum tuberosum PE=2 SV=1	4	1654-1672	1	GO:0005773(vacuole);GO:0016787(hydrolase activity);GO:0045735(nutrient reservoir activity);GO:0006952(defense response);GO:0016042(lipid catabolic process)
miR7782-3p_3	TRINITY_DN21552_c1_g3	TRINITY_DN21552_c1_g3	-	4	177-194	1
miR9410-p5_1	TRINITY_DN29344_c3_g1	TRINITY_DN29344_c3_g1	sp|Q8TGM7|ART2_YEAST Putative uncharacterized protein ART2 OS=Saccharomyces cerevisiae (strain ATCC 204508 / S288c) GN=ART2 PE=5 SV=1	0	239-258	1
miR9410-p5_1	TRINITY_DN26343_c0_g1	TRINITY_DN26343_c0_g1	sp|P92990|JP650_ARATH Probable polygalacturonase non-catalytic subunit JP650 OS=Arabidopsis thaliana GN=JP650 PE=2 SV=2	3	1256-1275	1	GO:0048046(apoplast);GO:0005618(cell wall)
miR9410-p5_1	TRINITY_DN5281_c0_g1	TRINITY_DN5281_c0_g1	-	3	62-81	1
miR9410-p5_1	TRINITY_DN21924_c0_g1	TRINITY_DN21924_c0_g1	-	3.5	321-341	1
miR9410-p5_1	TRINITY_DN40231_c0_g1	TRINITY_DN40231_c0_g1	sp|O48927|C78A3_SOYBN Cytochrome P450 78A3 OS=Glycine max GN=CYP78A3 PE=2 SV=1	4	129-148	1	GO:0009055(electron carrier activity);GO:0020037(heme binding);GO:0004497(monooxygenase activity);GO:0016705(oxidoreductase activity, acting on paired donors, with incorporation or reduction of molecular oxygen)
miR9410-p5_1	TRINITY_DN30072_c2_g1	TRINITY_DN30072_c2_g1	sp|O07051|LTAA_AERJA L-allo-threonine aldolase OS=Aeromonas jandaei GN=ltaA PE=1 SV=1	4	413-432	1	GO:0016829(lyase activity);GO:0030170(pyridoxal phosphate binding);GO:0006520(cellular amino acid metabolic process)	ko00260(Glycine,ko serine and threonine metabolism)
miR9410-p5_1	TRINITY_DN58_c0_g2	TRINITY_DN58_c0_g2	sp|Q28BZ1|RBM8A_XENTR RNA-binding protein 8A OS=Xenopus tropicalis GN=rbm8a PE=2 SV=1	4	919-937	1	GO:0005737(cytoplasm);GO:0016607(nuclear speck);GO:0000166(nucleotide binding);GO:0003723(RNA binding);GO:0006397(mRNA processing);GO:0051028(mRNA transport);GO:0000184(nuclear-transcribed mRNA catabolic process, nonsense-mediated decay);GO:0006417(regulation of translation);GO:0008380(RNA splicing)
miR9410-p5_1	TRINITY_DN58_c0_g1	TRINITY_DN58_c0_g1	sp|Q28BZ1|RBM8A_XENTR RNA-binding protein 8A OS=Xenopus tropicalis GN=rbm8a PE=2 SV=1	4	920-938	1	GO:0005737(cytoplasm);GO:0016607(nuclear speck);GO:0000166(nucleotide binding);GO:0003723(RNA binding);GO:0006397(mRNA processing);GO:0051028(mRNA transport);GO:0000184(nuclear-transcribed mRNA catabolic process, nonsense-mediated decay);GO:0006417(regulation of translation);GO:0008380(RNA splicing)
miR9560a-3p_1	TRINITY_DN45909_c0_g1	TRINITY_DN45909_c0_g1	-	3	887-907	1
miR9560a-3p_1	TRINITY_DN31177_c0_g1	TRINITY_DN31177_c0_g1	sp|Q8GW57|PP134_ARATH Pentatricopeptide repeat-containing protein At1g80150, mitochondrial OS=Arabidopsis thaliana GN=At1g80150 PE=2 SV=2	4	496-516	1	GO:0005739(mitochondrion)
miR9560a-3p_1	TRINITY_DN20977_c1_g1	TRINITY_DN20977_c1_g1	sp|Q7X996|CIPK2_ORYSJ CBL-interacting protein kinase 2 OS=Oryza sativa subsp. japonica GN=CIPK2 PE=2 SV=1	4	912-932	1	GO:0005524(ATP binding);GO:0004674(protein serine/threonine kinase activity);GO:0007165(signal transduction)
miR160c-p3_1	TRINITY_DN29344_c3_g1	TRINITY_DN29344_c3_g1	sp|Q8TGM7|ART2_YEAST Putative uncharacterized protein ART2 OS=Saccharomyces cerevisiae (strain ATCC 204508 / S288c) GN=ART2 PE=5 SV=1	0	5919-5936	1
miR160c-p3_1	TRINITY_DN49046_c0_g1	TRINITY_DN49046_c0_g1	-	2	341-358	1
miR160c-p3_1	TRINITY_DN35496_c0_g1	TRINITY_DN35496_c0_g1	-	2.5	362-379	1
miR160c-p3_1	TRINITY_DN48877_c0_g1	TRINITY_DN48877_c0_g1	-	3.5	204-221	1
miR160c-p3_1	TRINITY_DN32729_c1_g23	TRINITY_DN32729_c1_g23	-	3.5	642-658	1
miR160c-p3_1	TRINITY_DN20281_c0_g1	TRINITY_DN20281_c0_g1	-	3.5	3-19	1
miR160c-p3_1	TRINITY_DN41490_c0_g1	TRINITY_DN41490_c0_g1	-	4	182-199	1
miR160c-p3_1	TRINITY_DN505_c0_g1	TRINITY_DN505_c0_g1	-	4	30-47	1
miR160c-p3_1	TRINITY_DN12237_c0_g1	TRINITY_DN12237_c0_g1	-	4	232-249	1
miR160c-p3_1	TRINITY_DN50501_c0_g1	TRINITY_DN50501_c0_g1	-	4	79-96	1
miR160c-p3_1	TRINITY_DN39077_c0_g1	TRINITY_DN39077_c0_g1	-	4	36-53	1
miR160c-p3_1	TRINITY_DN7158_c0_g1	TRINITY_DN7158_c0_g1	-	4	171-188	1
miR160c-p3_1	TRINITY_DN7158_c0_g2	TRINITY_DN7158_c0_g2	-	4	171-188	1
miR160c-p3_1	TRINITY_DN7158_c0_g4	TRINITY_DN7158_c0_g4	-	4	171-188	1
miR160c-p3_1	TRINITY_DN7158_c0_g5	TRINITY_DN7158_c0_g5	-	4	171-188	1
miR160c-p3_1	TRINITY_DN7158_c0_g3	TRINITY_DN7158_c0_g3	-	4	171-188	1
miR160c-p3_1	TRINITY_DN7158_c0_g6	TRINITY_DN7158_c0_g6	-	4	171-188	1
miR160c-p3_1	TRINITY_DN38470_c0_g1	TRINITY_DN38470_c0_g1	-	4	195-212	1
miR160c-p3_1	TRINITY_DN9184_c0_g1	TRINITY_DN9184_c0_g1	-	4	38-55	1
miR160c-p3_1	TRINITY_DN3115_c0_g1	TRINITY_DN3115_c0_g1	-	4	374-391	1
miR160c-p3_1	TRINITY_DN16516_c0_g1	TRINITY_DN16516_c0_g1	-	4	388-404	1
miR160c-p3_1	TRINITY_DN15645_c0_g1	TRINITY_DN15645_c0_g1	sp|Q9LRB0|LCBK1_ARATH Sphingoid long-chain bases kinase 1 OS=Arabidopsis thaliana GN=LCBK1 PE=1 SV=1	4	728-745	1	GO:0005886(plasma membrane);GO:0017050(D-erythro-sphingosine kinase activity);GO:0004143(diacylglycerol kinase activity);GO:0007205(activation of protein kinase C activity by G-protein coupled receptor protein signaling pathway);GO:0030148(sphingolipid biosynthetic process)
miR160c-p3_1	TRINITY_DN22409_c0_g1	TRINITY_DN22409_c0_g1	-	4	1531-1547	1
miR160c-p3_1	TRINITY_DN31513_c1_g1	TRINITY_DN31513_c1_g1	sp|Q8VXV7|LDL1_ARATH Lysine-specific histone demethylase 1 homolog 1 OS=Arabidopsis thaliana GN=LDL1 PE=1 SV=1	4	1148-1164	1	GO:0005634(nucleus);GO:0016491(oxidoreductase activity);GO:0016575(histone deacetylation);GO:0051568(histone H3-K4 methylation);GO:0006355(regulation of transcription, DNA-dependent);GO:0048364(root development);GO:0006351(transcription, DNA-dependent)
miR160c-p3_1	TRINITY_DN22093_c0_g1	TRINITY_DN22093_c0_g1	-	4	566-583	1
miR160c-p3_1	TRINITY_DN12625_c0_g1	TRINITY_DN12625_c0_g1	sp|Q9FNL2|PP418_ARATH Pentatricopeptide repeat-containing protein At5g46100 OS=Arabidopsis thaliana GN=At5g46100 PE=2 SV=1	4	282-299	1	GO:0005488(binding)
miR164c	TRINITY_DN31397_c0_g1	TRINITY_DN31397_c0_g1	-	3.5	806-827	1
miR164c	TRINITY_DN49094_c0_g1	TRINITY_DN49094_c0_g1	-	4	1854-1874	1
miR164c	TRINITY_DN10157_c0_g1	TRINITY_DN10157_c0_g1	sp|Q9LK03|PERK2_ARATH Proline-rich receptor-like protein kinase PERK2 OS=Arabidopsis thaliana GN=PERK2 PE=2 SV=3	4	244-263	1	GO:0016021(integral to membrane);GO:0005886(plasma membrane);GO:0005524(ATP binding);GO:0004674(protein serine/threonine kinase activity);GO:0004872(receptor activity)
miR164c	TRINITY_DN23129_c0_g7	TRINITY_DN23129_c0_g7	sp|P59326|YTHD1_MOUSE YTH domain family protein 1 OS=Mus musculus GN=Ythdf1 PE=2 SV=1	4	968-988	1
miR166i_1	TRINITY_DN34807_c0_g1	TRINITY_DN34807_c0_g1	-	1	342-360	1
miR166i_1	TRINITY_DN17740_c1_g1	TRINITY_DN17740_c1_g1	-	1	526-544	1
miR166i_1	TRINITY_DN17740_c1_g2	TRINITY_DN17740_c1_g2	-	1	526-544	1
miR166i_1	TRINITY_DN14432_c0_g2	TRINITY_DN14432_c0_g2	-	1	356-374	1
miR166i_1	TRINITY_DN14432_c0_g3	TRINITY_DN14432_c0_g3	-	1	405-423	1
miR166i_1	TRINITY_DN27662_c0_g2	TRINITY_DN27662_c0_g2	sp|Q7XJ98|KATAM_ARATH Xyloglucan galactosyltransferase KATAMARI1 OS=Arabidopsis thaliana GN=KAM1 PE=1 SV=1	3	1404-1421	1	GO:0032580(Golgi cisterna membrane);GO:0030173(integral to Golgi membrane);GO:0016757(transferase activity, transferring glycosyl groups);GO:0010256(endomembrane system organization);GO:0042353(fucose biosynthetic process);GO:0009863(salicylic acid mediated signaling pathway);GO:0009826(unidimensional cell growth);GO:0009969(xyloglucan biosynthetic process)
miR166i_1	TRINITY_DN30156_c0_g1	TRINITY_DN30156_c0_g1	-	3	1197-1214	1
miR166i_1	TRINITY_DN11971_c0_g1	TRINITY_DN11971_c0_g1	-	3.5	242-261	1
miR166i_1	TRINITY_DN5685_c1_g1	TRINITY_DN5685_c1_g1	-	4	146-164	1
miR166i_1	TRINITY_DN27624_c0_g1	TRINITY_DN27624_c0_g1	sp|Q9LHK1|NUD16_ARATH Nudix hydrolase 16, mitochondrial OS=Arabidopsis thaliana GN=NUDT16 PE=2 SV=1	4	735-754	1	GO:0005739(mitochondrion);GO:0016787(hydrolase activity);GO:0046872(metal ion binding)
miR159a_5	TRINITY_DN14791_c0_g1	TRINITY_DN14791_c0_g1	-	2.5	439-461	1
miR159a_5	TRINITY_DN19342_c0_g1	TRINITY_DN19342_c0_g1	-	3	510-532	1
miR160_1	TRINITY_DN25969_c0_g1	TRINITY_DN25969_c0_g1	-	2	1042-1063	1
miR160_1	TRINITY_DN29251_c0_g1	TRINITY_DN29251_c0_g1	sp|Q8W486|Y1491_ARATH Uncharacterized protein At1g04910 OS=Arabidopsis thaliana GN=At1g04910 PE=1 SV=1	3.5	1571-1592	1	GO:0000139(Golgi membrane);GO:0016021(integral to membrane)
miR3954_1	TRINITY_DN21831_c0_g1	TRINITY_DN21831_c0_g1	-	0	366-387	1
miR3954_1	TRINITY_DN33087_c0_g1	TRINITY_DN33087_c0_g1	-	3.5	184-204	1
miR3954_1	TRINITY_DN33087_c0_g3	TRINITY_DN33087_c0_g3	-	3.5	295-315	1
miR3954_1	TRINITY_DN32806_c0_g1	TRINITY_DN32806_c0_g1	-	3.5	1184-1205	1
miR3954_1	TRINITY_DN17952_c0_g1	TRINITY_DN17952_c0_g1	-	4	2214-2235	1
miR7499-p3_1	TRINITY_DN29344_c3_g1	TRINITY_DN29344_c3_g1	sp|Q8TGM7|ART2_YEAST Putative uncharacterized protein ART2 OS=Saccharomyces cerevisiae (strain ATCC 204508 / S288c) GN=ART2 PE=5 SV=1	0	4652-4671	1
miR7499-p3_1	TRINITY_DN33203_c2_g1	TRINITY_DN33203_c2_g1	sp|Q9LQY3|P24D9_ARATH Transmembrane emp24 domain-containing protein p24delta9 OS=Arabidopsis thaliana GN=At1g26690 PE=2 SV=1	4	405-424	1
miR7499-p3_1	TRINITY_DN20825_c0_g1	TRINITY_DN20825_c0_g1	-	4	889-908	1
miR7499-p3_1	TRINITY_DN10083_c0_g1	TRINITY_DN10083_c0_g1	-	4	22-41	1
miR1511_1	TRINITY_DN14084_c0_g3	TRINITY_DN14084_c0_g3	-	2	44-64	1
miR1511_1	TRINITY_DN14084_c0_g2	TRINITY_DN14084_c0_g2	-	2	44-64	1
miR1511_1	TRINITY_DN14084_c0_g1	TRINITY_DN14084_c0_g1	-	2	44-64	1
miR1511_1	TRINITY_DN14880_c0_g2	TRINITY_DN14880_c0_g2	-	3	275-296	1
miR1511_1	TRINITY_DN27680_c0_g1	TRINITY_DN27680_c0_g1	-	3	522-542	1
miR1511_1	TRINITY_DN31502_c0_g2	TRINITY_DN31502_c0_g2	-	3	919-939	1
miR1511_1	TRINITY_DN35831_c0_g1	TRINITY_DN35831_c0_g1	-	3.5	116-136	1
miR1511_1	TRINITY_DN25329_c1_g4	TRINITY_DN25329_c1_g4	-	3.5	37-57	1
miR1511_1	TRINITY_DN25329_c1_g1	TRINITY_DN25329_c1_g1	-	3.5	228-248	1
miR1511_1	TRINITY_DN19681_c0_g3	TRINITY_DN19681_c0_g3	-	3.5	591-611	1
miR1511_1	TRINITY_DN32507_c2_g9	TRINITY_DN32507_c2_g9	-	4	122-142	1
miR1511_1	TRINITY_DN27252_c0_g1	TRINITY_DN27252_c0_g1	-	4	160-180	1
miR1511_1	TRINITY_DN18406_c0_g1	TRINITY_DN18406_c0_g1	-	4	87-107	1
miR1511_1	TRINITY_DN32507_c2_g4	TRINITY_DN32507_c2_g4	-	4	121-141	1
miR1511_1	TRINITY_DN32507_c2_g10	TRINITY_DN32507_c2_g10	-	4	121-141	1
miR1511_1	TRINITY_DN39386_c0_g1	TRINITY_DN39386_c0_g1	-	4	101-121	1
miR1511_1	TRINITY_DN28926_c0_g1	TRINITY_DN28926_c0_g1	sp|O81154|CYSK_SOLTU Cysteine synthase OS=Solanum tuberosum PE=2 SV=1	4	202-222	1	GO:0005737(cytoplasm);GO:0004124(cysteine synthase activity);GO:0030170(pyridoxal phosphate binding);GO:0016740(transferase activity);GO:0006535(cysteine biosynthetic process from serine)	ko00270(Cysteine and methionine metabolism);ko00450(Selenoamino acid metabolism);ko00920(Sulfur metabolism)
miR1511_1	TRINITY_DN23641_c1_g2	TRINITY_DN23641_c1_g2	-	4	158-179	1
miR1511_1	TRINITY_DN30267_c1_g1	TRINITY_DN30267_c1_g1	-	4	99-119	1
miR1536-p5_1	TRINITY_DN32829_c1_g8	TRINITY_DN32829_c1_g8	-	0	546-566	1
miR1536-p5_1	TRINITY_DN33082_c0_g4	TRINITY_DN33082_c0_g4	sp|Q9LRR4|R13L1_ARATH Putative disease resistance RPP13-like protein 1 OS=Arabidopsis thaliana GN=RPPL1 PE=3 SV=1	1	99-119	1	GO:0005524(ATP binding);GO:0005515(protein binding);GO:0006915(apoptosis);GO:0006952(defense response)
miR1536-p5_1	TRINITY_DN33149_c1_g2	TRINITY_DN33149_c1_g2	sp|Q9LRR4|R13L1_ARATH Putative disease resistance RPP13-like protein 1 OS=Arabidopsis thaliana GN=RPPL1 PE=3 SV=1	1	2352-2372	1	GO:0005524(ATP binding);GO:0005515(protein binding);GO:0006915(apoptosis);GO:0006952(defense response)
miR1536-p5_1	TRINITY_DN32861_c0_g2	TRINITY_DN32861_c0_g2	sp|Q9LRR4|R13L1_ARATH Putative disease resistance RPP13-like protein 1 OS=Arabidopsis thaliana GN=RPPL1 PE=3 SV=1	2	677-697	1	GO:0005524(ATP binding);GO:0005515(protein binding);GO:0006915(apoptosis);GO:0006952(defense response)
miR1536-p5_1	TRINITY_DN33082_c0_g3	TRINITY_DN33082_c0_g3	sp|Q9LRR4|R13L1_ARATH Putative disease resistance RPP13-like protein 1 OS=Arabidopsis thaliana GN=RPPL1 PE=3 SV=1	3	2708-2728	1	GO:0005524(ATP binding);GO:0005515(protein binding);GO:0006915(apoptosis);GO:0006952(defense response)
miR1536-p5_1	TRINITY_DN32829_c1_g1	TRINITY_DN32829_c1_g1	sp|Q9LRR4|R13L1_ARATH Putative disease resistance RPP13-like protein 1 OS=Arabidopsis thaliana GN=RPPL1 PE=3 SV=1	4	181-201	1	GO:0005524(ATP binding);GO:0005515(protein binding);GO:0006915(apoptosis);GO:0006952(defense response)
miR1536-p5_1	TRINITY_DN32587_c1_g4	TRINITY_DN32587_c1_g4	sp|Q8W4J9|RPP8_ARATH Disease resistance protein RPP8 OS=Arabidopsis thaliana GN=RPP8 PE=1 SV=2	4	1170-1190	1	GO:0005886(plasma membrane);GO:0005524(ATP binding);GO:0006915(apoptosis);GO:0051607(defense response to virus);GO:0009626(plant-type hypersensitive response);GO:0009416(response to light stimulus)
miR1536-p5_1	TRINITY_DN30887_c0_g1	TRINITY_DN30887_c0_g1	-	4	260-279	1
miR1536-p5_1	TRINITY_DN46800_c0_g1	TRINITY_DN46800_c0_g1	sp|Q9LRR4|R13L1_ARATH Putative disease resistance RPP13-like protein 1 OS=Arabidopsis thaliana GN=RPPL1 PE=3 SV=1	4	83-103	1	GO:0005524(ATP binding);GO:0005515(protein binding);GO:0006915(apoptosis);GO:0006952(defense response)
miR1536-p5_1	TRINITY_DN11547_c0_g1	TRINITY_DN11547_c0_g1	sp|Q9LRR4|R13L1_ARATH Putative disease resistance RPP13-like protein 1 OS=Arabidopsis thaliana GN=RPPL1 PE=3 SV=1	4	287-307	1	GO:0005524(ATP binding);GO:0005515(protein binding);GO:0006915(apoptosis);GO:0006952(defense response)
miR1536-p5_1	TRINITY_DN22199_c0_g1	TRINITY_DN22199_c0_g1	sp|Q9LRR4|R13L1_ARATH Putative disease resistance RPP13-like protein 1 OS=Arabidopsis thaliana GN=RPPL1 PE=3 SV=1	4	1206-1226	1	GO:0005524(ATP binding);GO:0005515(protein binding);GO:0006915(apoptosis);GO:0006952(defense response)
miR1536-p5_1	TRINITY_DN30391_c0_g1	TRINITY_DN30391_c0_g1	-	4	782-802	1
miR1536-p5_1	TRINITY_DN38861_c0_g1	TRINITY_DN38861_c0_g1	-	4	68-87	1
miR1536-p5_1	TRINITY_DN20555_c0_g1	TRINITY_DN20555_c0_g1	-	4	92-111	1
miR1536-p5_1	TRINITY_DN20769_c0_g1	TRINITY_DN20769_c0_g1	sp|O80983|FTSH4_ARATH ATP-dependent zinc metalloprotease FTSH 4, mitochondrial OS=Arabidopsis thaliana GN=FTSH4 PE=1 SV=2	4	1801-1820	1	GO:0016021(integral to membrane);GO:0005743(mitochondrial inner membrane);GO:0009536(plastid);GO:0005524(ATP binding);GO:0046872(metal ion binding);GO:0004222(metalloendopeptidase activity);GO:0017111(nucleoside-triphosphatase activity);GO:0030163(protein catabolic process);GO:0006508(proteolysis)
miR1536-p5_2	TRINITY_DN32829_c1_g8	TRINITY_DN32829_c1_g8	-	0	543-563	1
miR1536-p5_2	TRINITY_DN33149_c1_g2	TRINITY_DN33149_c1_g2	sp|Q9LRR4|R13L1_ARATH Putative disease resistance RPP13-like protein 1 OS=Arabidopsis thaliana GN=RPPL1 PE=3 SV=1	1	2349-2369	1	GO:0005524(ATP binding);GO:0005515(protein binding);GO:0006915(apoptosis);GO:0006952(defense response)
miR1536-p5_2	TRINITY_DN33082_c0_g4	TRINITY_DN33082_c0_g4	sp|Q9LRR4|R13L1_ARATH Putative disease resistance RPP13-like protein 1 OS=Arabidopsis thaliana GN=RPPL1 PE=3 SV=1	3	96-116	1	GO:0005524(ATP binding);GO:0005515(protein binding);GO:0006915(apoptosis);GO:0006952(defense response)
miR1536-p5_2	TRINITY_DN32861_c0_g2	TRINITY_DN32861_c0_g2	sp|Q9LRR4|R13L1_ARATH Putative disease resistance RPP13-like protein 1 OS=Arabidopsis thaliana GN=RPPL1 PE=3 SV=1	3	674-694	1	GO:0005524(ATP binding);GO:0005515(protein binding);GO:0006915(apoptosis);GO:0006952(defense response)
miR1536-p5_2	TRINITY_DN37151_c0_g1	TRINITY_DN37151_c0_g1	-	3	273-292	1
miR1536-p5_2	TRINITY_DN25952_c0_g1	TRINITY_DN25952_c0_g1	sp|Q9LHN4|LPAT5_ARATH Probable 1-acyl-sn-glycerol-3-phosphate acyltransferase 5 OS=Arabidopsis thaliana GN=LPAT5 PE=2 SV=1	3.5	1067-1086	1	GO:0016021(integral to membrane);GO:0003841(1-acylglycerol-3-phosphate O-acyltransferase activity);GO:0008654(phospholipid biosynthetic process)
miR1536-p5_2	TRINITY_DN19472_c0_g1	TRINITY_DN19472_c0_g1	sp|O22254|RL181_ARATH Putative 60S ribosomal protein L18-1 OS=Arabidopsis thaliana GN=RPL18A PE=2 SV=3	4	1180-1200	1	GO:0022625(cytosolic large ribosomal subunit);GO:0003735(structural constituent of ribosome);GO:0006412(translation)	ko03010(Ribosome)
miR1536-p5_2	TRINITY_DN13754_c0_g1	TRINITY_DN13754_c0_g1	-	4	194-214	1
miR1536-p5_2	TRINITY_DN38861_c0_g1	TRINITY_DN38861_c0_g1	-	4	65-85	1
miR1536-p5_2	TRINITY_DN1098_c0_g1	TRINITY_DN1098_c0_g1	sp|Q9LRR4|R13L1_ARATH Putative disease resistance RPP13-like protein 1 OS=Arabidopsis thaliana GN=RPPL1 PE=3 SV=1	4	39-59	1	GO:0005524(ATP binding);GO:0005515(protein binding);GO:0006915(apoptosis);GO:0006952(defense response)
miR1536-p5_2	TRINITY_DN46800_c0_g1	TRINITY_DN46800_c0_g1	sp|Q9LRR4|R13L1_ARATH Putative disease resistance RPP13-like protein 1 OS=Arabidopsis thaliana GN=RPPL1 PE=3 SV=1	4	80-100	1	GO:0005524(ATP binding);GO:0005515(protein binding);GO:0006915(apoptosis);GO:0006952(defense response)
miR1536-p5_2	TRINITY_DN32636_c1_g1	TRINITY_DN32636_c1_g1	-	4	48-68	1
miR1536-p5_2	TRINITY_DN49139_c0_g1	TRINITY_DN49139_c0_g1	-	4	283-302	1
miR1536-p5_2	TRINITY_DN32297_c0_g1	TRINITY_DN32297_c0_g1	-	4	455-474	1
miR1536-p5_2	TRINITY_DN21726_c0_g1	TRINITY_DN21726_c0_g1	sp|Q9LY77|ACA12_ARATH Calcium-transporting ATPase 12, plasma membrane-type OS=Arabidopsis thaliana GN=ACA12 PE=2 SV=1	4	3700-3720	1	GO:0016021(integral to membrane);GO:0005524(ATP binding);GO:0005388(calcium-transporting ATPase activity);GO:0005516(calmodulin binding);GO:0046872(metal ion binding);GO:0006754(ATP biosynthetic process)
miR1536-p5_2	TRINITY_DN20848_c0_g1	TRINITY_DN20848_c0_g1	sp|Q641W2|MYG1_RAT UPF0160 protein MYG1, mitochondrial OS=Rattus norvegicus GN=Myg1 PE=1 SV=1	4	52-72	1	GO:0005739(mitochondrion);GO:0005634(nucleus)
miR1536-p5_2	TRINITY_DN27561_c1_g3	TRINITY_DN27561_c1_g3	sp|Q9LK03|PERK2_ARATH Proline-rich receptor-like protein kinase PERK2 OS=Arabidopsis thaliana GN=PERK2 PE=2 SV=3	4	804-823	1	GO:0016021(integral to membrane);GO:0005886(plasma membrane);GO:0005524(ATP binding);GO:0004674(protein serine/threonine kinase activity);GO:0004872(receptor activity)
miR156a_1	TRINITY_DN30139_c2_g2	TRINITY_DN30139_c2_g2	-	1	1311-1331	1
miR156a_1	TRINITY_DN23154_c0_g1	TRINITY_DN23154_c0_g1	-	1	1583-1603	1
miR156a_1	TRINITY_DN28246_c1_g2	TRINITY_DN28246_c1_g2	sp|Q9LDA7|P2C39_ARATH Probable protein phosphatase 2C 39 OS=Arabidopsis thaliana GN=At3g15260 PE=2 SV=1	3	1151-1171	1	GO:0046872(metal ion binding);GO:0004721(phosphoprotein phosphatase activity)
miR156a_1	TRINITY_DN39776_c0_g1	TRINITY_DN39776_c0_g1	-	3.5	64-84	1
miR156a_1	TRINITY_DN31628_c0_g3	TRINITY_DN31628_c0_g3	-	4	104-124	1
miR156a_1	TRINITY_DN26961_c0_g2	TRINITY_DN26961_c0_g2	-	4	48-68	1
miR156a_1	TRINITY_DN31628_c0_g1	TRINITY_DN31628_c0_g1	-	4	317-337	1
miR156a_1	TRINITY_DN31628_c0_g4	TRINITY_DN31628_c0_g4	-	4	317-337	1
miR156a_1	TRINITY_DN31628_c0_g2	TRINITY_DN31628_c0_g2	-	4	298-318	1
miR159a-5p	TRINITY_DN32989_c1_g1	TRINITY_DN32989_c1_g1	sp|P14614|GLUB4_ORYSJ Glutelin type-B 4 OS=Oryza sativa subsp. japonica GN=GLUB4 PE=1 SV=1	4	164-184	1	GO:0009279(cell outer membrane);GO:0045735(nutrient reservoir activity);GO:0006952(defense response)
miR159a-5p	TRINITY_DN30849_c1_g33	TRINITY_DN30849_c1_g33	sp|P09800|LEGB_GOSHI Legumin B OS=Gossypium hirsutum GN=LEGB PE=2 SV=1	4	114-134	1	GO:0045735(nutrient reservoir activity)
miR159a-5p	TRINITY_DN30849_c1_g36	TRINITY_DN30849_c1_g36	sp|P09800|LEGB_GOSHI Legumin B OS=Gossypium hirsutum GN=LEGB PE=2 SV=1	4	114-134	1	GO:0045735(nutrient reservoir activity)
miR159a-5p	TRINITY_DN30849_c1_g3	TRINITY_DN30849_c1_g3	sp|P09800|LEGB_GOSHI Legumin B OS=Gossypium hirsutum GN=LEGB PE=2 SV=1	4	114-134	1	GO:0045735(nutrient reservoir activity)
miR159a-5p	TRINITY_DN30849_c1_g20	TRINITY_DN30849_c1_g20	sp|P09800|LEGB_GOSHI Legumin B OS=Gossypium hirsutum GN=LEGB PE=2 SV=1	4	114-134	1	GO:0045735(nutrient reservoir activity)
miR159a-5p	TRINITY_DN30849_c1_g31	TRINITY_DN30849_c1_g31	sp|P09800|LEGB_GOSHI Legumin B OS=Gossypium hirsutum GN=LEGB PE=2 SV=1	4	114-134	1	GO:0045735(nutrient reservoir activity)
miR159a-5p	TRINITY_DN30849_c1_g7	TRINITY_DN30849_c1_g7	sp|P09800|LEGB_GOSHI Legumin B OS=Gossypium hirsutum GN=LEGB PE=2 SV=1	4	114-134	1	GO:0045735(nutrient reservoir activity)
miR159a-5p	TRINITY_DN30849_c1_g21	TRINITY_DN30849_c1_g21	sp|P09800|LEGB_GOSHI Legumin B OS=Gossypium hirsutum GN=LEGB PE=2 SV=1	4	114-134	1	GO:0045735(nutrient reservoir activity)
miR159a-5p	TRINITY_DN30849_c1_g28	TRINITY_DN30849_c1_g28	sp|P09800|LEGB_GOSHI Legumin B OS=Gossypium hirsutum GN=LEGB PE=2 SV=1	4	114-134	1	GO:0045735(nutrient reservoir activity)
miR159a-5p	TRINITY_DN30849_c1_g22	TRINITY_DN30849_c1_g22	sp|P09800|LEGB_GOSHI Legumin B OS=Gossypium hirsutum GN=LEGB PE=2 SV=1	4	114-134	1	GO:0045735(nutrient reservoir activity)
miR159a-5p	TRINITY_DN30849_c1_g29	TRINITY_DN30849_c1_g29	sp|P09800|LEGB_GOSHI Legumin B OS=Gossypium hirsutum GN=LEGB PE=2 SV=1	4	114-134	1	GO:0045735(nutrient reservoir activity)
miR159a-5p	TRINITY_DN30849_c1_g6	TRINITY_DN30849_c1_g6	sp|P09800|LEGB_GOSHI Legumin B OS=Gossypium hirsutum GN=LEGB PE=2 SV=1	4	114-134	1	GO:0045735(nutrient reservoir activity)
miR159a-5p	TRINITY_DN30849_c1_g35	TRINITY_DN30849_c1_g35	sp|P09800|LEGB_GOSHI Legumin B OS=Gossypium hirsutum GN=LEGB PE=2 SV=1	4	114-134	1	GO:0045735(nutrient reservoir activity)
miR159a-5p	TRINITY_DN30849_c1_g23	TRINITY_DN30849_c1_g23	sp|P09800|LEGB_GOSHI Legumin B OS=Gossypium hirsutum GN=LEGB PE=2 SV=1	4	114-134	1	GO:0045735(nutrient reservoir activity)
miR159a-5p	TRINITY_DN30849_c1_g2	TRINITY_DN30849_c1_g2	sp|P09800|LEGB_GOSHI Legumin B OS=Gossypium hirsutum GN=LEGB PE=2 SV=1	4	114-134	1	GO:0045735(nutrient reservoir activity)
miR159a-5p	TRINITY_DN30849_c1_g13	TRINITY_DN30849_c1_g13	sp|P09800|LEGB_GOSHI Legumin B OS=Gossypium hirsutum GN=LEGB PE=2 SV=1	4	114-134	1	GO:0045735(nutrient reservoir activity)
miR159a-5p	TRINITY_DN30849_c1_g25	TRINITY_DN30849_c1_g25	sp|P09800|LEGB_GOSHI Legumin B OS=Gossypium hirsutum GN=LEGB PE=2 SV=1	4	114-134	1	GO:0045735(nutrient reservoir activity)
miR159a-5p	TRINITY_DN30849_c1_g14	TRINITY_DN30849_c1_g14	sp|P09800|LEGB_GOSHI Legumin B OS=Gossypium hirsutum GN=LEGB PE=2 SV=1	4	114-134	1	GO:0045735(nutrient reservoir activity)
miR159a-5p	TRINITY_DN22315_c0_g1	TRINITY_DN22315_c0_g1	sp|O24543|AX22E_VIGRR Auxin-induced protein 22E OS=Vigna radiata var. radiata GN=AUX22E PE=2 SV=1	4	712-732	1	GO:0005634(nucleus);GO:0046983(protein dimerization activity);GO:0009734(auxin mediated signaling pathway);GO:0006355(regulation of transcription, DNA-dependent);GO:0006351(transcription, DNA-dependent)
miR159a-5p	TRINITY_DN22315_c0_g2	TRINITY_DN22315_c0_g2	sp|O24543|AX22E_VIGRR Auxin-induced protein 22E OS=Vigna radiata var. radiata GN=AUX22E PE=2 SV=1	4	824-844	1	GO:0005634(nucleus);GO:0046983(protein dimerization activity);GO:0009734(auxin mediated signaling pathway);GO:0006355(regulation of transcription, DNA-dependent);GO:0006351(transcription, DNA-dependent)
miR160a-3p_1`	TRINITY_DN25969_c0_g1	TRINITY_DN25969_c0_g1	-	4	981-1001	1
miR162a_1	TRINITY_DN14706_c0_g1	TRINITY_DN14706_c0_g1	-	0	558-578	1
miR162a_1	TRINITY_DN34000_c0_g1	TRINITY_DN34000_c0_g1	-	4	34-53	1
miR162b-p5	TRINITY_DN14706_c0_g1	TRINITY_DN14706_c0_g1	-	0	627-647	1
miR162b-p5	TRINITY_DN3069_c78_g1	TRINITY_DN3069_c78_g1	-	3.5	208-228	1
miR162b-p5	TRINITY_DN2248_c0_g1	TRINITY_DN2248_c0_g1	-	3.5	51-71	1
miR162b-p5	TRINITY_DN19742_c2_g2	TRINITY_DN19742_c2_g2	-	3.5	156-176	1
miR162b-p5	TRINITY_DN11060_c0_g1	TRINITY_DN11060_c0_g1	sp|Q9FIJ0|RBOHD_ARATH Respiratory burst oxidase homolog protein D OS=Arabidopsis thaliana GN=RBOHD PE=1 SV=1	4	462-481	1	GO:0016021(integral to membrane);GO:0005886(plasma membrane);GO:0005509(calcium ion binding);GO:0009055(electron carrier activity);GO:0050660(flavin adenine dinucleotide binding);GO:0005506(iron ion binding);GO:0016174(NAD);GO:0004601(peroxidase activity);GO:0050832(defense response to fungus);GO:0043069(negative regulation of programmed cell death);GO:0072593(reactive oxygen species metabolic pr…
miR162b-p5	TRINITY_DN31343_c0_g1	TRINITY_DN31343_c0_g1	sp|Q6NQJ6|RNR1_ARATH Ribonuclease II, chloroplastic/mitochondrial OS=Arabidopsis thaliana GN=RNR1 PE=1 SV=1	4	1266-1286	1
miR162b-p5	TRINITY_DN27213_c0_g2	TRINITY_DN27213_c0_g2	-	4	191-212	1
miR169a_2	TRINITY_DN19121_c0_g1	TRINITY_DN19121_c0_g1	-	1.5	224-244	1
miR169a_2	TRINITY_DN19121_c0_g2	TRINITY_DN19121_c0_g2	-	1.5	372-392	1
miR171c-3p_1	TRINITY_DN18665_c0_g2	TRINITY_DN18665_c0_g2	-	4	231-251	1
miR171c-3p_1	TRINITY_DN18665_c0_g1	TRINITY_DN18665_c0_g1	-	4	322-342	1
miR171j-5p	TRINITY_DN18665_c0_g2	TRINITY_DN18665_c0_g2	-	0	295-315	1
miR171j-5p	TRINITY_DN18665_c0_g1	TRINITY_DN18665_c0_g1	-	0	386-406	1
miR171j-5p	TRINITY_DN31490_c2_g1	TRINITY_DN31490_c2_g1	sp|Q8VHK9|DHX36_MOUSE Probable ATP-dependent RNA helicase DHX36 OS=Mus musculus GN=Dhx36 PE=2 SV=2	3.5	443-463	1	GO:0005634(nucleus);GO:0005524(ATP binding);GO:0008026(ATP-dependent helicase activity);GO:0003676(nucleic acid binding)
miR171j-5p	TRINITY_DN14581_c0_g1	TRINITY_DN14581_c0_g1	-	4	232-252	1
miR171j-5p_1	TRINITY_DN18665_c0_g2	TRINITY_DN18665_c0_g2	-	4	295-315	1
miR171j-5p_1	TRINITY_DN18665_c0_g1	TRINITY_DN18665_c0_g1	-	4	386-406	1
miR171k-3p	TRINITY_DN18665_c0_g2	TRINITY_DN18665_c0_g2	-	4	231-251	1
miR171k-3p	TRINITY_DN18665_c0_g1	TRINITY_DN18665_c0_g1	-	4	322-342	1
miR171k-5p_1	TRINITY_DN49287_c0_g1	TRINITY_DN49287_c0_g1	-	3.5	341-360	1
miR171k-5p_1	TRINITY_DN8531_c0_g2	TRINITY_DN8531_c0_g2	-	4	37-57	1
miR171k-5p_1	TRINITY_DN8531_c0_g1	TRINITY_DN8531_c0_g1	sp|Q9SXS8|ERF3_TOBAC Ethylene-responsive transcription factor 3 OS=Nicotiana tabacum GN=ERF3 PE=2 SV=1	4	37-57	1	GO:0005634(nucleus);GO:0003677(DNA binding);GO:0003700(sequence-specific DNA binding transcription factor activity);GO:0006952(defense response);GO:0009873(ethylene mediated signaling pathway)
miR171k-5p_1	TRINITY_DN42886_c0_g1	TRINITY_DN42886_c0_g1	sp|O49399|PP321_ARATH Pentatricopeptide repeat-containing protein At4g18840 OS=Arabidopsis thaliana GN=PCMP-E101 PE=3 SV=2	4	33-54	1	GO:0005488(binding)
miR172b-5p_1	TRINITY_DN28308_c1_g2	TRINITY_DN28308_c1_g2	sp|F4K2A1|FPGS1_ARATH Folylpolyglutamate synthase OS=Arabidopsis thaliana GN=FPGS1 PE=1 SV=1	3	87-106	1		ko00790(Folate biosynthesis)
miR172b-5p_1	TRINITY_DN32029_c0_g1	TRINITY_DN32029_c0_g1	-	3.5	1157-1178	1
miR172b-5p_1	TRINITY_DN24622_c1_g1	TRINITY_DN24622_c1_g1	sp|Q9FRL3|ERDL6_ARATH Sugar transporter ERD6-like 6 OS=Arabidopsis thaliana GN=At1g75220 PE=2 SV=1	3.5	1400-1419	1	GO:0016021(integral to membrane);GO:0005774(vacuolar membrane);GO:0022891(substrate-specific transmembrane transporter activity);GO:0008643(carbohydrate transport)
miR172b-5p_1	TRINITY_DN45554_c0_g1	TRINITY_DN45554_c0_g1	-	4	159-179	1
miR172b-5p_1	TRINITY_DN45780_c0_g1	TRINITY_DN45780_c0_g1	-	4	219-240	1
miR172b-5p_1	TRINITY_DN31532_c0_g1	TRINITY_DN31532_c0_g1	sp|Q9SK03|RAP27_ARATH Ethylene-responsive transcription factor RAP2-7 OS=Arabidopsis thaliana GN=RAP2-7 PE=2 SV=2	4	463-483	1	GO:0005634(nucleus);GO:0003677(DNA binding);GO:0003700(sequence-specific DNA binding transcription factor activity);GO:0009873(ethylene mediated signaling pathway);GO:0010228(vegetative to reproductive phase transition of meristem)
miR172b-5p_1	TRINITY_DN26813_c0_g1	TRINITY_DN26813_c0_g1	-	4	314-334	1
miR2118b-p3_1	TRINITY_DN20747_c0_g1	TRINITY_DN20747_c0_g1	-	0	310-328	1
miR2118b-p3_1	TRINITY_DN20426_c0_g1	TRINITY_DN20426_c0_g1	sp|Q9LXE8|PP386_ARATH Pentatricopeptide repeat-containing protein At5g15340, mitochondrial OS=Arabidopsis thaliana GN=PCMP-H91 PE=2 SV=1	3	835-854	1	GO:0005739(mitochondrion)
miR2118b-p3_1	TRINITY_DN20151_c0_g1	TRINITY_DN20151_c0_g1	sp|A2XNT2|CESA5_ORYSI Probable cellulose synthase A catalytic subunit 5 [UDP-forming] OS=Oryza sativa subsp. indica GN=CESA5 PE=2 SV=1	3	2924-2941	1	GO:0016021(integral to membrane);GO:0005886(plasma membrane);GO:0016760(cellulose synthase );GO:0008270(zinc ion binding);GO:0007047(cellular cell wall organization);GO:0030244(cellulose biosynthetic process)
miR2118b-p3_1	TRINITY_DN31172_c0_g1	TRINITY_DN31172_c0_g1	-	3.5	960-978	1
miR2118b-p3_1	TRINITY_DN5818_c0_g1	TRINITY_DN5818_c0_g1	-	4	218-236	1
miR2118b-p3_1	TRINITY_DN50313_c0_g1	TRINITY_DN50313_c0_g1	sp|Q9SHZ8|PP168_ARATH Pentatricopeptide repeat-containing protein At2g22070 OS=Arabidopsis thaliana GN=PCMP-H41 PE=3 SV=1	4	93-112	1	GO:0005488(binding)
miR2118b-p3_1	TRINITY_DN1072_c0_g2	TRINITY_DN1072_c0_g2	-	4	251-269	1
miR2118b-p3_1	TRINITY_DN40965_c0_g1	TRINITY_DN40965_c0_g1	-	4	28-47	1
miR2118b-p3_1	TRINITY_DN1072_c0_g1	TRINITY_DN1072_c0_g1	-	4	323-341	1
miR2118b-p3_1	TRINITY_DN20233_c0_g1	TRINITY_DN20233_c0_g1	-	4	474-492	1
miR2118b-p3_1	TRINITY_DN26344_c0_g4	TRINITY_DN26344_c0_g4	-	4	766-785	1
miR2118b-p3_1	TRINITY_DN26344_c0_g3	TRINITY_DN26344_c0_g3	-	4	766-785	1
miR2118b-p3_1	TRINITY_DN26344_c0_g7	TRINITY_DN26344_c0_g7	-	4	766-785	1
miR2118b-p3_1	TRINITY_DN26344_c0_g6	TRINITY_DN26344_c0_g6	-	4	766-785	1
miR2118b-p3_1	TRINITY_DN26344_c0_g10	TRINITY_DN26344_c0_g10	-	4	766-785	1
miR2118b-p3_1	TRINITY_DN26344_c0_g9	TRINITY_DN26344_c0_g9	-	4	766-785	1
miR2118b-p3_1	TRINITY_DN26344_c0_g12	TRINITY_DN26344_c0_g12	-	4	766-785	1
miR2118b-p3_1	TRINITY_DN26344_c0_g5	TRINITY_DN26344_c0_g5	-	4	766-785	1
miR2118b-p3_1	TRINITY_DN26344_c0_g2	TRINITY_DN26344_c0_g2	-	4	766-785	1
miR2118b-p3_1	TRINITY_DN26344_c0_g11	TRINITY_DN26344_c0_g11	-	4	766-785	1
miR2118b-p3_1	TRINITY_DN26344_c0_g8	TRINITY_DN26344_c0_g8	-	4	766-785	1
miR2118b-p3_1	TRINITY_DN26344_c0_g1	TRINITY_DN26344_c0_g1	-	4	2084-2103	1
miR2118b-p5_1	TRINITY_DN20747_c0_g1	TRINITY_DN20747_c0_g1	-	0	310-328	1
miR2118b-p5_1	TRINITY_DN20426_c0_g1	TRINITY_DN20426_c0_g1	sp|Q9LXE8|PP386_ARATH Pentatricopeptide repeat-containing protein At5g15340, mitochondrial OS=Arabidopsis thaliana GN=PCMP-H91 PE=2 SV=1	3	835-854	1	GO:0005739(mitochondrion)
miR2118b-p5_1	TRINITY_DN20151_c0_g1	TRINITY_DN20151_c0_g1	sp|A2XNT2|CESA5_ORYSI Probable cellulose synthase A catalytic subunit 5 [UDP-forming] OS=Oryza sativa subsp. indica GN=CESA5 PE=2 SV=1	3	2924-2941	1	GO:0016021(integral to membrane);GO:0005886(plasma membrane);GO:0016760(cellulose synthase );GO:0008270(zinc ion binding);GO:0007047(cellular cell wall organization);GO:0030244(cellulose biosynthetic process)
miR2118b-p5_1	TRINITY_DN31172_c0_g1	TRINITY_DN31172_c0_g1	-	3.5	960-978	1
miR2118b-p5_1	TRINITY_DN5818_c0_g1	TRINITY_DN5818_c0_g1	-	4	218-236	1
miR2118b-p5_1	TRINITY_DN50313_c0_g1	TRINITY_DN50313_c0_g1	sp|Q9SHZ8|PP168_ARATH Pentatricopeptide repeat-containing protein At2g22070 OS=Arabidopsis thaliana GN=PCMP-H41 PE=3 SV=1	4	93-112	1	GO:0005488(binding)
miR2118b-p5_1	TRINITY_DN1072_c0_g2	TRINITY_DN1072_c0_g2	-	4	251-269	1
miR2118b-p5_1	TRINITY_DN40965_c0_g1	TRINITY_DN40965_c0_g1	-	4	28-47	1
miR2118b-p5_1	TRINITY_DN1072_c0_g1	TRINITY_DN1072_c0_g1	-	4	323-341	1
miR2118b-p5_1	TRINITY_DN20233_c0_g1	TRINITY_DN20233_c0_g1	-	4	474-492	1
miR2118b-p5_1	TRINITY_DN26344_c0_g4	TRINITY_DN26344_c0_g4	-	4	766-785	1
miR2118b-p5_1	TRINITY_DN26344_c0_g3	TRINITY_DN26344_c0_g3	-	4	766-785	1
[truncated: 2,434 more rows]
