# Supplementary material for: Small RNA proﬁling for identification of microRNAs involved in regulation of seed development and lipid biosynthesis in yellowhorn
Source: Research Square preprint supplement (doi:10.21203/rs.3.rs-139285/v1), 2021-01-07
Supplement: Supplementary file 10 [file 9d17da1137f7a03eed0a1299.docx]

**Table S1** Distribution of small RNAs among different categories in HO yellowhorn.

| Category | HO40_1 | HO40_2 | HO54_1 | HO54_2 | HO68_1 | HO68_2 | HO81_1 | HO81_2 | Average |
| --- | --- | --- | --- | --- | --- | --- | --- | --- | --- |
| Total | 15,102,556 | 14,058,247 | 13,892,050 | 16,610,901 | 11,314,611 | 8,812,929 | 11,275,850 | 8,572,830 | 12,454,997 |
| rRNA | 142,700 | 194,450 | 339,861 | 458,695 | 270,764 | 205,887 | 769,177 | 386,119 | 345,957 |
| tRNA | 47,450 | 36,431 | 31,141 | 39,088 | 24,539 | 17,451 | 44,915 | 25,979 | 3,374 |
| snoRNA | 8,868 | 11,366 | 8,403 | 13,980 | 5,739 | 3,447 | 4,551 | 8,736 | 8,136 |
| snRNA | 1,003 | 898 | 976 | 899 | 532 | 295 | 908 | 1,613 | 891 |
| Other Rfam RNA | 969 | 1,844 | 4,218 | 10,219 | 3,281 | 2,267 | 29,258 | 8,543 | 7,575 |
| Repeat | 1,610 | 2,436 | 2,782 | 8,058 | 1,835 | 2,253 | 5,719 | 2,903 | 3,450 |
| Unannotated | 14,900,527 | 13,811,766 | 13,505,144 | 16,081,237 | 11,008,359 | 8,581,896 | 10,422,160 | 8,139,425 | 12,056,314 |
| Unique reads | 7,855,937 | 6,309,713 | 5,887,512 | 5,037,736 | 3,451,084 | 1,158,052 | 1,319,935 | 2,261,906 | 4,160,234 |
