# Supplementary material for: Small RNA proﬁling for identification of microRNAs involved in regulation of seed development and lipid biosynthesis in yellowhorn
Source: Research Square preprint supplement (doi:10.21203/rs.3.rs-139285/v1), 2021-01-07
Supplement: Supplementary file 11 [file d3d18fcd84d0a99cd6cfb84b.xlsx]

## Sheet: Sheet1
Table S3 The known miRNAs identified in yellow horn.
miR_name	Reference Sequence	miR_sequence	Length	Family	HO40_norm	HO54_norm	HO68_norm	HO81_norm	LO40_norm	LO54_norm	LO68_norm	LO81_norm
miR156b-5p	mtr-miR156b-5p	TGACAGAAGAGAGTGAGCAC	20	MIR156	3565.89	2731.2	5236.41	4535.39	7096.39	9155.87	3579.57	8437.17
miR156b-3p_1	mtr-miR156b-3p	GCTCACTCTCTCTCTGTCACC	21	MIR156	48.3055	22.283	29.6548	7.64762	102.972	61.2026	16.0904	66.8177
miR156a	gma-miR156a	TGACAGAAGAGAGTGAGCAC	20	MIR156	3565.89	2731.2	5236.41	4535.39	7096.39	9155.87	3579.57	8437.17
miR156e-p3_1	mes-miR156e-p3	GCTCACATCTCTTTCTGTCAGC	22	MIR156	204.64	312.948	506.857	1332.05	125.51	385.597	588.316	1155.1
miR156a_1	gma-miR156a	TGACAGAAGAGAGTGAGCACC	21	MIR156	63.4477	43.7228	45.5974	28.3335	103.276	58.6987	38.3866	61.9845
miR156e-3p_1	aly-miR156e-3p	GCTCACCCTCTCTCTGTCACC	21	MIR156	25855.6	17709.5	21540	17659.7	47734.6	40302.4	10888.5	33941
miR156e_1	mtr-miR156e	TTGACAGAAGAGAGAGAGCAC	21	MIR156	3.25589	21.7241	145.024	24.0513	0	77.7743	104.896	19.3993
miR156c-p5_1	mdm-miR156c-p5	ACCTCTCTCTCTGTCTACT	19	MIR156	0	0	0	0	0	0	0	11.4034
miR156a_2	mtr-miR156a	TGACAGAAGAGAGAGAGCAC	20	MIR156	0	0.94772	13.3497	0	1.59415	6.06641	1.92744	3.20719
miR156j-p3_1	mtr-miR156j-p3	TATATTATGTTTATACAAT	19	MIR156	0	0.94772	0	0	0	0	0	0
miR156b_1	tcc-miR156b	TCTGACAGAAGAGAGTGAGCAC	22	MIR156	35.0007	24.0671	26.4382	8.41177	29.7881	54.7059	44.8704	34.2101
miR156i-3p_1	mtr-miR156i-3p	TGCTCACTTCTCCTCTGTCAGC	22	MIR156	8980.65	16185.2	15476.9	63333.3	8160.34	20716.6	18884.3	40623.8
miR159d-p5_1	mes-miR159d-p5	TTTGCATGACCTTGGAGACGT	21	MIR159	11.2849	0.94772	0	0	9.4722	1.65124	0	0
miR159a_1	mtr-miR159a	TTTGGATTGAAGGGAGCTCC	20	MIR159	14072.3	20084.9	24344.7	6812.82	38292.7	30788.3	18342.1	18682
miR159b_1	hbr-miR159b	CTTGCATATCTCTGGAGCTTC	21	MIR159	48.7281	10.1791	0	0	32.3285	2.93554	0	7.8398
miR159a	mtr-miR159a	TTTGGATTGAAGGGAGCTCTA	21	MIR159	32.6613	20.2096	12.0862	12.2741	15.0944	2.38512	1.77917	3.20719
miR159d-p3	mes-miR159d-p3	TTTGCATGACCTTGGAGACGT	21	MIR159	11.2849	0.94772	0	0	9.4722	1.65124	0	0
miR159b	mtr-miR159b	ATTGGAGTGAAGGGAGCTCCA	21	MIR159	13.5774	1.13726	0	0	20.6174	10.3192	7.41322	44.8804
miR159a_2	mtr-miR159a	TTTGGATTGAAGGGGGCTCTA	21	MIR159	4.34118	4.7386	0	0	15.0944	2.38512	1.77917	3.20719
miR159a_3	mtr-miR159a	CTTTGGATTGAAGGGAGCTCT	21	MIR159	32.6613	20.2096	12.0862	12.2741	52.3449	25.8839	20.2844	17.5064
miR159a_4	mtr-miR159a	TTTGGATTGAAGGGAGCTCTG	21	MIR159	64.4631	295.762	23.5005	12.2741	73.4216	36.4407	29.298	17.5064
miR159a-5p	gma-miR159a-5p	GAGCTCCTTGAAGTCCAATAG	21	MIR159	1964.72	518.203	147.023	39.4221	2213.84	652.325	78.2503	63.8112
miR159_1	ppe-miR159	TTTGGATTGAAGGGAGCTCTACCA	24	MIR159	510.475	176.984	5.48873	4.20588	275.794	62.8724	47.2556	48.5987
miR159c_1	ath-miR159c	TTTGGATTGAAGGGAGCTCTTTT	23	MIR159	2757.12	444.819	65.2752	47.1059	1193.3	111.149	132.847	141.029
miR159a_5	cpa-miR159a	GGTTTGGATTGAAGGGAGCTCTA	23	MIR159	75.7091	19.661	0	4.20588	28.379	3.11901	1.48264	0
miR319h-p5	ptc-miR319h-p5	AGGTGCATGGTGTGGGAGCAACT	23	MIR159	381.199	16.516	11.2031	220.393	200.343	50.5402	12.4839	197.828
miR319a-p5_1	lus-miR319a-p5	TGGCAATGAGGATTTATT	18	MIR159	13.4836	13.3744	7.67077	0	95.8665	27.2434	0	38.0415
miR319d-p3_1	rco-miR319d-p3	TGCATTAAGGCAAAACTTGACATG	24	MIR159	0	1.51635	3.79989	0	0	3.30248	10.8622	0
miR319b-p5	mes-miR319b-p5	AGCTGCCGACTCATTCATCCA	21	MIR159	3.41093	0	0	0	0	0	0	0
miR319a_1	mes-miR319a	TTGGACTGAAGGGAGCTCCC	20	MIR159	1609.73	459.454	59.2932	0	101.352	27.8083	9.79103	7.1271
miR319a-3p_1	mtr-miR319a-3p	TTTGGACTGAAGGGAGCTCC	20	MIR319	34.2918	4.07519	3.45185	0	16.453	7.00489	4.67775	0
miR319p_1	gma-miR319p	TTGGATTGAAGGGAGCTCC	19	MIR319	195.832	256.143	328.561	104.559	677.198	451.149	193.166	337.565
miR162b-p5	gma-miR162b-p5	GGAGGCAGCGGTTCATCGATC	21	MIR162_1	34.3156	51.3871	53.1021	21.0687	111.642	94.8583	56.2479	41.2047
miR162a_1	gma-miR162a	TCGATAAACCTCTGCATCCAG	21	MIR162_1	199.753	63.9189	70.1097	39.8419	212.824	117.638	74.705	76.0394
miR162-p5_1	cme-miR162-p5	GTGGAGGCAGCGGATCAAC	19	MIR162_1	0	0	0	0	0	0	0	33.4761
miR162-p3_1	cme-miR162-p3	AGTGGAGGCAGCGGATCAAC	20	MIR162_1	0	0	0	0	0	0	0	16.0142
miR164c	cme-miR164c	TGGAGAAGCAGGGCACGTGCA	21	MIR164	357.913	225.069	322.176	217.148	100.936	262.504	186.358	198.783
miR164a-3p_1	aly-miR164a-3p	CACGTGCTCCCCTTCTCCAAC	21	MIR164	61.3853	46.4809	187.24	105.227	91.2225	158.566	116.156	148.381
miR164a-5p	aly-miR164a-5p	TGGAGAAGCAGGGCACGTGCA	21	MIR164	357.913	225.069	322.176	217.148	100.936	262.504	186.358	198.783
miR164d	cpa-miR164d	TGGAGAAGGGGAGCACGTGCA	21	MIR164_3	0	3.79088	3.37768	0	0	0	4.01797	0
miR168d	nta-miR168d	TCGCTTGGTGCAGGTCGGGAA	21	MIR168	5865.34	4271.92	3956.71	2762.83	10672.8	7131.69	2414.19	2990.88
miR168c-3p	mtr-miR168c-3p	CCCGCCTTGCATCAACTGAAT	21	MIR168	934.391	722.474	234.902	91.3077	1424.99	671.93	283.691	197.023
miR528-5p	ata-miR528-5p	TGGAAGGGGCATGCAGAGGAG	21	MIR528	4.0311	0	0	0	0	0	0	0
miR530_1	ppe-miR530	TGCATTTGCACCTGCACCTCT	21	MIR530	77.6222	610.549	591.91	871.668	86.0331	734.013	852.364	251.704
miR167b_1	vvi-miR167b	TGAAGCTGCCAGCATGATCTT	21	MIR167_1	18049.9	21841.1	27785	39220	16918.8	18356.4	20419.1	26718.1
miR167e-p3	vvi-miR167e-p3	GATCATGTGGCAGTTTCACC	20	MIR167_1	1192.95	1695.76	845.046	52.7284	1017.06	2663.16	1229.92	92.8766
miR167b-5p_1	mtr-miR167b-5p	TGAAGCTGCCAGCATGATCTGA	22	MIR167_1	2430.89	2590.24	4890	5309.32	1635.59	1766.93	2899.19	3512.33
miR167b-5p_2	mtr-miR167b-5p	TGAAGCTGCCAGCATGATCTGG	22	MIR167_1	2430.89	2590.24	4890	5309.32	1635.59	1766.93	2899.19	3512.33
miR167a-5p_1	aly-miR167a-5p	TGAAGCTGCCAGCATGATCTTTT	23	MIR167_1	98.1413	49.7214	16.044	39.7271	15.6069	6.23802	23.5463	30.6475
miR167b-3p	aly-miR167b-3p	GGTCATGCTCTGACAGCCTCACT	23	MIR167_1	101.094	103.82	178.331	26.2683	44.5041	9.17356	74.6327	41.2936
miR167c-3p_1	ath-miR167c-3p	AGATCATGCGGCAGTTTCACC	21	MIR167_2	108.827	231.901	779.919	61.7895	239.419	353.074	558.976	142.1
miR827-p5_1	mes-miR827-p5	TTTGTTGATTGTCATCTACTC	21	MIR827_4	19.2339	8.98802	13.9266	0	12.9813	19.3634	10.953	6.41439
miR827	mes-miR827	TTAGATGACCATCAACAAACA	21	MIR827_4	2744.72	1698.81	563.706	259.588	12.9813	19.3634	10.953	6.41439
miR166e-5p	mtr-miR166e-5p	GGAATGTTGTCTGGCTCGAGG	21	MIR166	1344.59	629.35	683.019	49.4973	1908.91	1049.15	433.677	188.537
miR166a	mtr-miR166a	TCGGACCAGGCTTCATTCCCC	21	MIR166	53296.2	66783.8	76075.7	70874.6	67096.2	61623.7	65451.4	58879.5
miR166i_1	cme-miR166i	TCGGACCAGGCTTCATTTT	19	MIR166	14.574	45.6445	24.9395	8.60357	70.0873	13.9675	6.22711	13.5415
miR166a_1	mtr-miR166a	TCTCGGACCAGGCTTCATTCC	21	MIR166	7554.87	12863.8	9325.01	13267.3	4598.55	3736.34	5006.79	7422.17
miR166a_2	mtr-miR166a	TCGGACCAGGCTTCATTCCCG	21	MIR166	1211.03	1208.48	1227.44	1143.09	1279.41	707.76	857.474	926.301
miR166a-p5_1	zma-miR166a-p5	TCTCTTCTTCTTCTTCTTTTTCTT	24	MIR166	2.55568	1.62395	0	0	0	0	0	0
miR166f-p5_1	mtr-miR166f-p5	TGTTTCTTCCTCCCTTTCT	19	MIR166	0	0.94772	0	0	0	0	0	3.56355
miR166c-p5_1	sbi-miR166c-p5	GCGTGCATGGTGGTGGCT	18	MIR166	0	0	0	0	0	0	0	3.56355
miR166n-p3	ptc-miR166n-p3	AATGAAGTTTGATCCAAGATC	21	MIR166	28.0007	11.9529	14.2182	0	6.45227	4.18814	4.54153	6.77074
miR166g-5p_1	mtr-miR166g-5p	GAATGTTGTTTGGCTCGAGGT	21	MIR166	0.826892	0.50545	0	0	8.04393	0	0	0
miR169l-p5_1	cme-miR169l-p5	ATGGAAGTGATGAATATT	18	MIR169_1	1.24034	1.23204	0	0	9.39441	2.5686	0	2.85084
miR169a	mtr-miR169a	CAGCCAAGGATGACTTGCCGA	21	MIR169_2	20.0654	66.0792	54.3478	238.561	3.58471	43.2858	89.0496	381.572
miR169l-3p_1	mtr-miR169l-3p	GGCAAGTTGTCTTTGGCTATA	21	MIR169_2	26.112	105.883	80.5216	364.725	10.1936	143.664	169.395	2224.42
miR169a_1	mtr-miR169a	CAGCCAAGGATGACTTGCCG	20	MIR169_2	10.5191	45.1646	30.8086	167.345	2.39123	29.4041	58.9139	311.66
miR169a_2	gma-miR169a	CAGCCAAGGATGACTTGCCAG	21	MIR169_2	0	5.68632	33.7222	33.8782	0	0	38.0447	45.3475
miR169a-3p_1	zma-miR169a-3p	CAAGTTGTTCTTGGCTACATGTT	23	MIR169_2	5.75029	4.7386	10.2814	7.57059	0	0	44.181	0
miR171j-5p	gma-miR171j-5p	TATTGGCCTGGTTCACTCAGA	21	MIR171_1	77.3915	17.353	2.53326	0	95.6363	12.0022	1.18612	0
miR171d	mtr-miR171d	TGATTGAGCCGTGCCAATATC	21	MIR171_1	6489.74	3877.11	3644.36	1645.05	3305.83	2938.35	3437.52	3631.01
miR171h-p3_1	mes-miR171h-p3	GATGGTCTTTGATTGAGCCGTGCC	24	MIR171_1	5.11136	0	0	0	0	0	0	0
miR171c-3p_1	gma-miR171c-3p	TTGAGCCGCGCCAATATCACT	21	MIR171_1	215.427	481.308	480.989	64.9647	94.8627	232.242	85.6293	26.1923
miR171k-3p	gma-miR171k-3p	TTGAGCCGCGCCAATATCACT	21	MIR171_1	215.427	481.308	480.989	64.9647	94.8627	232.242	85.6293	26.1923
miR171k-3p_1	gma-miR171k-3p	TTGAGCCGCGCCAATATCACTT	22	MIR171_1	37.627	84.1914	108.771	13.4211	17.1648	41.3192	22.1146	3.20719
miR171i-p5_1	ptc-miR171i-p5	CTTTTCCTTCTTCTTCTTGC	20	MIR171_1	36.2035	247.634	184.317	493.523	193.408	139.066	42.9226	604.117
miR171j-5p_1	gma-miR171j-5p	TATTGGCCCGGGTCACTCAGA	21	MIR171_1	750.461	233.484	308.667	149.468	810.584	447.13	122.298	210.61
miR171b_1	lus-miR171b	TGATTGAGCCGTGCCAATATCCA	23	MIR171_1	11.82	7.34938	0	0	0	0	0	0
miR171k-5p_1	gma-miR171k-5p	CGATATTGGTGAGGTTCAATC	21	MIR171_1	37.2275	96.732	56.7955	0	16.9624	33.1382	13.2586	0
miR171b_2	ssl-miR171b	CTTGAGCCGCGCCAATATCACT	22	MIR171_1	0	10.936	4.2221	0	0	0	0	0
miR171c-5p	aly-miR171c-5p	AGATATTGGTGCGGTTCAATC	21	MIR171_1	95.8884	26.7758	14.0039	0	52.9416	17.2911	10.7473	0
miR171b-3p_1	aly-miR171b-3p	TGATTGAGCCGTGCCAATATCCCA	24	MIR171_1	3.51406	1.82695	0	0	0	0	0	0
miR171e	sly-miR171e	TTGAGCCGCGTCAATATCTCT	21	MIR171_1	0	0.852948	0	0	0	0	0	8.28561
miR390	mtr-miR390	AAGCTCAGGAGGGATAGCGCC	21	MIR390	2470.34	5333.83	14453.2	1972.63	5323.35	27332.6	14797.3	7902.78
miR390a-3p_1	gma-miR390a-3p	CGCTATCCATCCTGAGTTTCA	21	MIR390	144.57	568.708	1073.71	176.196	318.69	1596.83	1522.13	850.551
miR390_1	mtr-miR390	CTCAGGAGGGATAGCGCC	18	MIR390	0	0	5.755	0	0	6.325	0	0
miR390a-p5_1	hex-miR390a-p5	TAAGAAGAATAAGCTCAGGAT	21	MIR390	14.7427	1.89544	0	0	8.68259	3.30248	3.85488	0
miR390a-5p_1	aly-miR390a-5p	ATCAAGCTCAGGAGGGATAGCGCC	24	MIR390	0	0	11.8219	0	2.86436	22.2145	30.6315	0
miR397-5p	mtr-miR397-5p	TCATTGAGTGCAGCGTTGATG	21	MIR397	799.84	197.89	390.286	321.68	2265.38	781.894	633.6	896.089
miR397a-p3_1	ptc-miR397a-p3	CTAGCGCTGCATTCAATCGTG	21	MIR397	44.2282	1.89544	0	0	317.11	24.4161	12.4542	51.0946
miR397a-5p_1	aly-miR397a-5p	TCATTGAGTGCAGCGTTGATTT	22	MIR397	10.0915	0	0	0	34.8497	0	0	0
miR398a-3p	mtr-miR398a-3p	TGTGTTCTCAGGTCACCCCTT	21	MIR398	2.48068	17.0565	449.798	270.568	127.809	55.4083	102.358	557.227
miR398c-5p_1	ptc-miR398c-5p	GGAGCGACCTGAGATCACATG	21	MIR398	3.41093	0	0	11.4714	105.992	6.64981	0	19.9559
miR398b	ptc-miR398b	TGTGTTCTCAGGTCGCCCCTG	21	MIR398	75.9655	5.93904	2.55692	87.5997	437.142	37.2608	32.992	154.499
miR398b_1	rco-miR398b	TGTGTTCTCAGGTCGCCCCTG	21	MIR398	75.9655	5.93904	2.55692	87.5997	437.142	37.2608	32.992	154.499
miR399b-5p_1	aly-miR399b-5p	GGGCTTCTTTCCTTTGGCAGG	21	MIR399	0	454.225	0	68.4072	148.23	3643.39	150.659	145.572
miR399l	mtr-miR399l	TGCCAAAGGAGAGTTGCCCTG	21	MIR399	479.575	635.629	414.928	31.5464	186.29	678.463	97.1744	32.0719
miR399c_1	mtr-miR399c	TGCCAAAGGAGATTTGCC	18	MIR399	0	0	0	0	1.43218	1.83471	0	0
miR399c	cme-miR399c	TGCCAAAGGAGATTTGCCCGG	21	MIR399	63.8861	16.4328	15.306	0	68.5208	51.0709	58.8203	24.3665
miR393-5p_1	ata-miR393-5p	TTCCAAAGGGATCGCATTGATC	22	MIR393	0	2.93554	0	0	11.9455	2.93554	0	0
miR403a-p5	tcc-miR403a-p5	GGTTTGTGCGTGAATTTAATA	21	MIR403	572.394	192.013	86.3083	60.2219	282.892	60.8542	121.694	61.6508
miR403a	ptc-miR403a	TTAGATTCACGCACAAACTCG	21	MIR403	326.572	242.123	403.744	378.771	156.159	395.948	735.38	298.81
miR403a_1	gma-miR403a	TTAGATTCACGCACAAAC	18	MIR403	0	0	0	0	3.74455	0	0	7.8398
miR403-5p_1	sly-miR403-5p	TTTGTGCGTGAATCTAACACC	21	MIR403	2.79076	1.7059	0	0	0	0	2.37223	0
miR535b_1	mdm-miR535b	ACAAGGAGAGAGAGCACGCTT	21	MIR535	1963.84	2079.83	3990.67	4680.63	2414.59	3723.42	4117.97	6069.67
miR535-p3_1	tcc-miR535-p3	GCGTGCTCTATCTCGTTGTCA	21	MIR535	109.089	89.5318	130.306	226.209	147.436	107.656	126.342	364.513
miR535a	mdm-miR535a	TGACAACGAGAGAGAGCACGC	21	MIR535	2.01555	0	0	0	0	48.3622	0	0
miR535b	ppe-miR535b	TGACGACGAGAGAGAGCACGC	21	MIR535	0	0	0	0	0	145.087	0	0
miR827_1	ath-miR827	CTTAGATGACCATCAACAAACA	22	MIR827_3	45.9849	26.0958	4.64431	0	41.4842	57.3405	29.6344	0
miR827_2	ath-miR827	TTAGATGACCATCAACAAATT	21	MIR827_3	3.10084	7.25523	0	0	2.14827	0	2.66876	0
miR1448-p5_2	ptc-miR1448-p5	TGTGGGAGGATTGGACAGAAC	21	MIR482	1290.61	651.833	1504.54	544.362	2556.04	2444.95	1347.64	779.584
miR482c-3p_1	ptc-miR482c-3p	TCTTTCCGATGCCTCCCATACC	22	MIR482	25325.3	13503.5	6333.67	10669.8	14787.4	6659.69	12988.1	6996.45
miR482b-3p_1	gma-miR482b-3p	TCTTTCCAACACCTCCCATACC	22	MIR482	262586	155306	60387.8	63359.1	53425.2	54132.4	103764	57028.4
miR482a-3p_1	gma-miR482a-3p	TTCCCAATTCCACCCATTCCTA	22	MIR482	7.90213	18.3858	0	0	47.2257	39.9148	0	0
miR482b-3p_2	gma-miR482b-3p	TCTTCCCAACACCTCCCATACC	22	MIR482	2368.99	1185.79	397.33	578.828	1115.72	683.889	461.841	1037.63
miR482e-p3_1	gma-miR482e-p3	TTCCCAACACCTCCCATACCGC	22	MIR482	1680.99	1321.88	1512.02	1654.39	1063.74	1317.46	2363.96	2977.99
miR482a-5p_1	mdm-miR482a-5p	TAGGAATGGACTGTTTGGGAAGA	23	MIR482	84.7354	22.4394	11.8219	0	18.4052	34.086	9.04044	6.41439
miR482b-p3_1	ppe-miR482b-p3	TTGCAGTAGGGAGATAGT	18	MIR482	0	1.51635	0	0	0	0	0	9.26522
miR2118a-3p_1	gma-miR2118a-3p	TTGCCGATTCCACCCATGCCTA	22	MIR482	5.75029	5.49677	0	0	0	9.67245	0	0
miR2118b-p5_1	gma-miR2118b-p5	TTGCCAATTCCACCCATGC	19	MIR482	109.006	209.786	121.349	122.817	208.997	67.05	61.8458	239.03
miR2118b-p3_1	gma-miR2118b-p3	TTGCCAATTCCACCCATGC	19	MIR482	109.006	209.786	121.349	122.817	208.997	67.05	61.8458	239.03
miR2118b-p3_2	gma-miR2118b-p3	TTGCCAATTCCACCCATTT	19	MIR482	4.96135	21.9424	5.48873	0	12.3526	4.83622	2.66876	11.047
miR2948-p3_1	ghr-miR2948-p3	TTACCAACACCTCCCATACCGT	22	MIR482	1.39538	3.19411	0	0	0	0	1.63091	0
miR1448-p5_1	ptc-miR1448-p5	TCTTTCCAACACCTCCCA	18	MIR482	17.1715	17.4906	9.35961	12.4274	38.5943	13.2865	8.44181	155.84
miR160a	mtr-miR160a	TGCCTGGCTCCCTGTATGCCA	21	MIR160	3619.12	2491.06	2765.08	2739.93	2598.8	1621.73	903.332	807.564
miR160e-3p_1	osa-miR160e-3p	GCGTGCGAGGAGCCATGCATG	21	MIR160	87.2248	12.9684	4.64431	0	26.05	0	0	0
miR160c_1	mtr-miR160c	TGCCTGGCTCCCTGGATGCCA	21	MIR160	16.777	4.1828	0	0	27.4757	2.93554	1.18612	0
miR160c_2	mtr-miR160c	GTGCCTGGCTCCCTGTATGCC	21	MIR160	117.289	28.0488	11.78	0	246.561	17.3888	7.57632	0
miR160a_1	mtr-miR160a	TGCCTGGCTCCCTGTATGCCG	21	MIR160	944.847	597.955	470.484	558.185	429.73	264.305	147.422	200.764
miR160c-p3_1	cme-miR160c-p3	AGCCATGCATGTGTAAGT	18	MIR160	0	3.98042	13.3497	0	20.3084	13.0172	0	25.1237
miR160a_2	mtr-miR160a	TGCCTGGCTCCCTGTATGCC	20	MIR160	97.9083	72.4509	62.8871	103.565	178.474	46.6517	17.2042	107.576
miR160_1	csi-miR160	CTGCCTGGCTCCCTGTATGCCA	22	MIR160	110.198	86.5632	69.3185	58.9428	57.1092	20.0326	16.9346	11.1809
miR160a-3p_1`	gma-miR160a-3p	GCGTATGAGGAGCCATGCATA	21	MIR160	1395.53	420.274	146.082	18.6977	1221.27	136.893	82.2016	26.6381
miR172b	mtr-miR172b	AGAATCTTGATGATGCTGCAT	21	MIR172	83.1324	109.95	32.1317	25.9436	270.748	239.869	80.8644	63.4321
miR172a-p3_1	ath-miR172a-p3	ATGGACGGTGGAGATTCAATC	21	MIR172	0	4.64259	0	0	2.19196	0	0	0
miR172d-p5_1	mes-miR172d-p5	TCTTTGTCTTTGTCTCCCT	19	MIR172	0	0.758176	0	0	5.38027	0	0	0
miR172d-p3_1	mes-miR172d-p3	TCTTTGTCTTTGTCTCCCT	19	MIR172	0	0.758176	0	0	5.38027	0	0	0
miR172b-5p_1	gma-miR172b-5p	GTAGCATCATCAAGATTCACA	21	MIR172	22.0716	11.5328	0	0	42.845	33.6015	1.48264	4.27626
miR172a_1	gma-miR172a	GGAATCTTGATGATGCTGCAG	21	MIR172	1.24034	0	0	0	0	0	0	0
miR172c-5p_1	mtr-miR172c-5p	GTAGCATCATCAAGATTCAC	20	MIR172	14.3339	1.23204	0	0	52.039	10.8261	1.48264	4.27626
miR394a-5p	gma-miR394a-5p	TTGGCATTCTGTCCACCTCC	20	MIR394	200.038	144.015	89.6897	140.101	285.656	75.5556	43.8974	226.736
miR396e-5p	osa-miR396e-5p	TCCACAGGCTTTCTTGAACTG	21	MIR396	19.2252	0	2.11105	0	0	2.72038	0	0
miR396c-p5_1	mes-miR396c-p5	CTTCAACTTCTTCTTCCTCATC	22	MIR396	5.35582	9.36525	7.0793	18.3534	2.86436	10.3192	7.26774	15.8808
miR396c-p5_2	csi-miR396c-p5	CTTCGTCTTCTTCTTCTTCCC	21	MIR396	0	3.41179	0	0	0	0	0	0
miR396c_1	sbi-miR396c	TTCCACAGCTTTCTTGAACTG	21	MIR396	50.3304	14.1986	1.68884	0	26.084	101.128	5.07714	31.071
miR396a-5p	gma-miR396a-5p	TTCCACAGCTTTCTTGAACTG	21	MIR396	50.3304	14.1986	1.68884	0	26.084	101.128	5.07714	31.071
miR408-3p_1	mtr-miR408-3p	TGCACTGCCTCTTCCCTT	18	MIR408	0	0	0	0	22.8786	0	0	0
miR408-3p_2	mtr-miR408-3p	TGCACTGCCTCTTCCCTGG	19	MIR408	0	0	0	10.3622	26.9759	0	0	24.4555
miR408-3p_3	mtr-miR408-3p	TGCACTGCCTCTTCCCTCT	19	MIR408	0	0	0	0	1.90957	0	0	0
miR408-5p_1	ptc-miR408-5p	ACGGGGAACAGGCAGAGCATG	21	MIR408	24.7967	0	6.13661	72.5738	443.432	18.7826	17.8881	190.967
miR408-3p_4	ptc-miR408-3p	TGCACTGCCTCTTCCCTGGCT	21	MIR408	199.141	11.7181	40.4477	793.356	1837.21	165.866	55.5382	934.939
miR408a_1	zma-miR408a	TGCACTGCCTCTTCCCTGGCT	21	MIR408	199.141	11.7181	40.4477	793.356	1837.21	165.866	55.5382	934.939
miR408a_2	mdm-miR408a	TGCACTGCCTCTTCCCTGGCT	21	MIR408	199.141	11.7181	40.4477	793.356	1837.21	165.866	55.5382	934.939
miR2118e-p3_1	osa-miR2118e-p3	GAAAAGAGAGTCAAAGAGT	19	MIR2118	1.24034	12.6169	65.3867	69.6879	2.50631	50.8847	28.0665	102.366
miR2118-p3_2	hbr-miR2118-p3	TTTCCCATGCCACCCATTTTTA	22	MIR2118	475.236	156.78	0	0	1893.6	1190.36	2457.68	2059.6
miR828-p3_1	aly-miR828-p3	ATCATGTGATGAATTTTG	18	MIR828	0	1.51635	0	0	18.3136	0	0	0
miR845d_1	vvi-miR845d	TGGCTCTGATACCAATTGT	19	MIR845_2	0	1.04249	0	0	0	0	0	0
miR845a-p3_1	ath-miR845a-p3	GTGGCTCTGATACCAATTGT	20	MIR845_1	0	4.38579	1.68884	11.7961	3.38544	0	0	0
miR845a_1	vvi-miR845a	AGCTCTGATACCAATTGT	18	MIR845_3	0	1.7059	0	0	31.4589	0	0	5.70168
miR1536-p5_2	gma-miR1536-p5	TGTTTTGCTTATTGTGCCATC	21	MIR1536	43.3492	96.2538	111.045	106.585	31.7371	105.996	136.587	202.233
miR5234-p3_1	mtr-miR5234-p3	TTGTGGATGGCGGAAGGCTTG	21	MIR1536	17.2797	35.573	68.8239	10.5155	17.2885	53.6684	41.0767	14.9669
miR1536-p5_1	gma-miR1536-p5	AGATGTTTTGCTTATTGTGCC	21	MIR1536	10.5847	19.9791	16.9981	7.66649	5.8161	29.6404	26.8924	17.8177
miR5234-p5_1	mtr-miR5234-p5	TCGAAAAGATGTTTTGCTTAT	21	MIR1536	346.323	483.699	581.254	434.752	183.083	516.049	894.728	851.831
miR7122a	mdm-miR7122a	TTATACAGAGAAATCACGGTCG	22	MIR1509	0	0	0	0	0	4.83622	0	0
miR1863c-p3_1	osa-miR1863c-p3	ACTAGCTCTGATACCATGT	19	MIR1863	6.04665	8.37966	0	0	64.0016	5.13719	0	5.34532
miR1863c-p3_2	osa-miR1863c-p3	ACTAGCTCTGATACCATGTT	20	MIR1863	6.04665	8.37966	0	0	64.0016	5.13719	0	5.34532
miR2592bj-p5_1	mtr-miR2592bj-p5	ATTCCCACTGTCCCTGTC	18	MIR2592	0	0	0	256.711	0	0	0	667.21
miR2592bj-p5_2	mtr-miR2592bj-p5	ATTCCCACTGTCCCTGTCTA	20	MIR2592	0	0	0	406.03	1.43218	0	0	1673.79
miR2592bj-p5_3	mtr-miR2592bj-p5	ATTCCCACTGTCCCTGTCT	19	MIR2592	0	0	0	406.03	1.43218	0	0	1673.79
mtr-miR2659e-p5	mtr-miR2659e-p5	AAATATAGATATAGATAC	18	MIR2659	0	3	0	0	6	0	0	0
miR2873c-p3_1	osa-miR2873c-p3	TTTGTTATTTTTATTTGTA	19	MIR2873	0	1	0	0	0	0	0	0
miR3630-3p_1	vvi-miR3630-3p	TGGGAATCTCTTTGATGCA	19	MIR3630	0	1	0	0	0	0	0	0
miR3630-3p_2	vvi-miR3630-3p	ATGGGAATCTCTCTGATGCAT	21	MIR3630	112.679	101.536	100.371	224.6	347.623	141.682	30.2571	265.223
miR3630-3p_3	vvi-miR3630-3p	TGGGAATCTCTTTGATGCAC	20	MIR3630	37.4814	23.9314	12.2377	27.7588	126.518	36.2031	0	58.4876
miR4415a-p3_1	gma-miR4415a-p3	AAGCTGTGATGAGAATCT	18	MIR4415	0	3	0	0	27	0	0	0
miR5225-5p_1	ppe-miR5225-5p	TCTGTCGCAGGAGAGATGGC	20	MIR5225	0	1.99021	0	0	0	0	0	0
miR5303j-p3_1	stu-miR5303j-p3	ATTCAAATTTCTGCCCTA	18	MIR5303	0	0	0	0	0	0	0	12.6286
miR5303j-p5_1	stu-miR5303j-p5	ATTCAAATTTCTGCCCTA	18	MIR5303	0	0	0	0	0	0	0	12.6286
miR9560a-5p_1	bra-miR9560a-5p	ACAGGCGGTGGAACAAATATGAGT	24	MIR9560	0	0	2.53326	56.7794	0	2.93554	120.076	85.794
miR9560a-3p_1	bra-miR9560a-3p	TCATATTTGTTCTACCACCTG	21	MIR9560	0	0	0	0	0	0	2.22397	36.6605
miR5368-p5_1	gma-miR5368-p5	AGTGAGATACCACTCTGGAAGAGC	24	undefined	0	0	0	342.329	2.62566	0	0	1375.31
miR5368-p3_1	gma-miR5368-p3	CCAAGGGACAGTCTCAGG	18	undefined	11.952	14.4811	62.2132	3251.95	0	9.90744	89.0032	12808.9
miR5368-p3_2	gma-miR5368-p3	CTGTTCCCTGGGATTGGCT	19	undefined	0	0	0	226.561	0	0	0	632.821
miR5368_1	gma-miR5368	GGACAGTCTCAGGTAGACAGT	21	undefined	0	0	0	0	0	0	0	14.4998
miR845-p5_1	cme-miR845-p5	TCTCAATTCTTCATCATC	18	undefined	0	3.31702	0	7.66649	10.8341	2.75207	0	4.98897
miR845-p3_1	cme-miR845-p3	TCTCAATTCTTCATCATC	18	undefined	0	3.31702	0	7.66649	10.8341	2.75207	0	4.98897
miR3954_1	csi-miR3954	TTGGACAGAGAAATCACGGTCA	22	undefined	6684.87	8131.66	8783.44	7020.29	7931.51	12433.9	12727.9	8256.91
miR3954_2	csi-miR3954	TTGGACAGAGAAATCATGGTCA	22	undefined	0	0	0	0	0.954785	1.83471	3.2646	0
miR6423-p3_2	ptc-miR6423-p3	GGCGGTGGCGGTGGCGGTGGA	21	undefined	0	0	0	0	0	0	0	66.9947
miR6423-p5_1	ptc-miR6423-p5	TGGCGGCGGTGGCGGCGGA	19	undefined	0	0	0	0	0	0	0	23.8758
miR6423-p5_2	ptc-miR6423-p5	GGCGGTGGCGGTGGCGGTGGC	21	undefined	0	0	0	0	0	0	0	9.97793
miR6423-p3_3	ptc-miR6423-p3	GGCGGTGGCGGTGGCGGA	18	undefined	0	0	0	54.4681	0	0	0	177.445
miR6423-p3_4	ptc-miR6423-p3	GGCGGCGGTGGCGGCGGA	18	undefined	0	0	0	0	0	0	0	18.8868
miR6423-p5_3	ptc-miR6423-p5	GGCGGTGGCGGTGGCGGA	18	undefined	0	0	0	54.4681	0	0	0	177.445
miR6423-p5_4	ptc-miR6423-p5	GGCGGTGGCGGTGGCGGT	18	undefined	0	0	0	0	0	0	0	66.9947
miR6423-p3_1	ptc-miR6423-p3	GGCGGTGGCGGTGGCGGT	18	undefined	0	0	0	0	0	0	0	66.9947
miR6424-p3_1	ptc-miR6424-p3	GGTGCCACGCTGCGTGCGTC	20	undefined	0	0	0	93.6834	0	0	0	73.9458
miR2613-p3_1	mtr-miR2613-p3	TGGCGGCGGTGGCGGTGGA	19	undefined	0	0	0	0	0	0	0	182.81
miR2613-p3_2	mtr-miR2613-p3	GGCGGCGGTGGCGGTGGA	18	undefined	0	0	0	0	0	0	0	66.282
miR2603-p3_1	mtr-miR2603-p3	GTCCCTGCCCTTTGTACA	18	undefined	0	0	0	16.2512	0	0	0	86.0846
miR2645-p3_1	mtr-miR2645-p3	TAACTCTCTTCAATTATTCC	20	undefined	2.79076	60.3433	32.3846	80.9478	29.3938	24.9547	4.44793	46.9508
miR2916-p5_1	peu-miR2916-p5	TACCGTCCTAGTCTCAACCATA	22	undefined	173.701	159.197	114.113	3798.33	236.497	86.2707	96.8001	21235.9
miR2916-p3_1	peu-miR2916-p3	CGATGCCGACCAGGGATCAGCGG	23	undefined	92.2625	101.963	207.152	5467.53	148.601	72.6464	366.312	15482
miR5243-p5_1	mtr-miR5243-p5	GGTTGTTTGAGAATGCAG	18	undefined	0	0	0	0	2	0	0	0
miR5257-p3_1	mtr-miR5257-p3	GAAGAGAAAGAAGTTGTCCTT	21	undefined	0	0	8.43784	0	0	0	0	0
miR4995-p3	gma-miR4995-p3	CTCATAGGCAGTGGCTTGGTT	21	undefined	0	0	0	0	0	0	0	32
miR5083_1	osa-miR5083	AATCAGACTACAATTATCTGATCT	24	undefined	52.0265	41.4996	28.0529	63.3948	58.2952	17.27	8.9802	7.59514
miR5144-p5_1	osa-miR5144-p5	GTGCGATGATGATGAGAA	18	undefined	0	0	0	0	7.64468	0	0	0
miR5153-p3_1	osa-miR5153-p3	TAATTTTTATATATATTT	18	undefined	0	2	0	0	0	0	0	0
miR5153-p5_1	osa-miR5153-p5	TAATTTTTATATATATTT	18	undefined	0	2	0	0	0	0	0	0
miR5162_1	osa-miR5162	AAATGACCAAAATACCCCTCTAAC	24	undefined	21	7.79572	2.95547	0	0	0	3	0
miR3634-p5_1	vvi-miR3634-p5	TGGAGTTTTGTGAAGCGAA	19	undefined	0	6.64687	4.96825	21.2023	11.8709	1.65124	0	0
miR3634-p3_1	vvi-miR3634-p3	GGAGTTTTGTGAAGCGAA	18	undefined	0	1.32681	3.06831	3.82381	4.18252	0	0	0
miR3634-p3_2	vvi-miR3634-p3	TGGAGTTTTGTGAAGCGAA	19	undefined	0	6.64687	4.96825	21.2023	11.8709	1.65124	0	0
miR5532_1	osa-miR5532	TGGAATATATGACAAAGG	18	undefined	0	2.84316	0	0	1.79342	0	0	0
miR1134-p5_1	tae-miR1134-p5	GGTGGCGGCGGAGGAGGT	18	undefined	0	0	0	65.0606	0	0	0	272.686
miR1511_1	gma-miR1511	AACCAGGCTCTGATACCATGA	21	undefined	0	4.35951	5.14069	0	16.8835	40.9218	0	3.56355
miR1511_2	gma-miR1511	AACCAGGCTCTGATACCA	18	undefined	0	1.51635	5.14069	0	9.11522	17.109	0	3.56355
miR5633-p5_1	ath-miR5633-p5	TGTTTATATTATTTTCCT	18	undefined	0	2.46407	0	0	5.97807	0	0	0
miR5647-p3_1	ath-miR5647-p3	TTAAGTTGTCCTATTTTA	18	undefined	0	4.0336	0	11.9109	5.93545	0	0	0
miR5655-p3	ath-miR5655-p3	TGGTGGTGGTGGAGGAGGA	19	undefined	0	0	0	0	0	0	0	19.2659
miR6029-p5_1	bna-miR6029-p5	ATTTCTGGCTTGGCTTCTGTATCT	24	undefined	4.7919	1.62395	0	0	0	0	0	0
miR6029-p3_1	bna-miR6029-p3	ATTTCTGGCTTGGCTTCTGTATCT	24	undefined	4.7919	1.62395	0	0	0	0	0	0
miR6173-p3_1	hbr-miR6173-p3	TACCCCAGTAGTCCTAGCC	19	undefined	0	0	0	94.6393	0	0	0	178.362
miR6300_1	gma-miR6300	GTCGTTGTAGTATAGTGGTGAGT	23	undefined	6718.86	11139.3	10366.6	14977	11447.4	14067.6	11643	46064
miR6478_1	ptc-miR6478	CCGACCTTAGCTCAGTTGGTAGA	23	undefined	39.4169	33.8634	51.6744	16.0594	59.7231	158.526	97.8491	71.8957
miR6483-p3_1	hbr-miR6483-p3	ACCCAATTTTATTGTAGAAA	20	undefined	0	0.852948	0	0	12.0638	0	0	0
miR6483-p5_1	hbr-miR6483-p5	ACCCAATTTTATTGTAGAAA	20	undefined	0	0.852948	0	0	12.0638	0	0	0
miR7499-p3_1	ghr-miR7499-p3	GGTTAATTCCGTTAACGAAC	20	undefined	0	0.94772	8.99699	7.64762	0	7.28603	4.00314	3.56355
miR7539-p5_1	lja-miR7539-p5	AATGAGGTATTTCAAAATACCTTT	24	undefined	0	0	4.64431	0	0	0	16.0663	0
miR7694-p5_1	osa-miR7694-p5	TTATGAATCTGAACAGAA	18	undefined	0	3.60133	0	0	0	0	0	9.26522
miR7760-p5_1	bdi-miR7760-p5	GGCGGTGGAGGCGGTGGA	18	undefined	0	0	0	28.2761	0	0	0	88.5331
miR7760-p3_1	bdi-miR7760-p3	GGAGGCGGTGGAGGTGGA	18	undefined	0	0	0	86.8172	0	0	0	397.5
miR7760-p3_2	bdi-miR7760-p3	GGTGGCGGCGGTGGAGGC	18	undefined	0	0	0	119.528	0	0	0	242.681
miR7782-3p_1	bdi-miR7782-3p	ACTTGCTCTGATACCATGT	19	undefined	0	0	0	0	6.08676	0	0	0
miR7782-3p_2	bdi-miR7782-3p	CCTGCTCTGATACCATGT	18	undefined	0	1.7059	0	0	37.9549	0	0	0
miR7782-3p_3	bdi-miR7782-3p	ACCTGCTCTGATACCATGT	19	undefined	1621.19	308.566	43.7843	26.0765	2027.51	244.13	102.017	143.835
miR8175_1	ath-miR8175	TCCCCGGCAACGGCGCCA	18	undefined	3.72101	35.4563	104.864	80.2419	95.3998	79.7899	12.5265	216.199
miR8175_2	ath-miR8175	CGATCCCCGGCAACGGCGCCA	21	undefined	0	48.6747	66.136	79.3803	33.7542	90.8456	89.2998	148.335
miR9410-p5_1	bol-miR9410-p5	CTTTGCAGACGACTTAAATA	20	undefined	0	0	23.2088	65.1935	1.90957	4.83622	12.6173	222.773
miR9492-p5_1	bdi-miR9492-p5	AGGGCTCTGATACCATGTT	19	undefined	0	2.3693	0	0	11.9018	0	0	0
miR9492-p3_1	bdi-miR9492-p3	TTAAGGCTCTGATACCATG	19	undefined	0	1.13726	0	0	4.18252	0	0	0
miR9492-p5_2	bdi-miR9492-p5	TTAAGGCTCTGATACCATG	19	undefined	0	1.13726	0	0	4.18252	0	0	0
miR1425-5p	osa-miR1425-5p	TAGGATTCAATCCTTGCTGCT	21	undefined	5.89161	0	0	0	0	0	0	0
miR1432-5p_1	osa-miR1432-5p	ATCAGGAGAGATGACACCGACA	22	undefined	3.10084	0	0	0	0	0	0	0
miR5072_1	osa-miR5072	TCCCCAGTGGAGTCGCCA	18	undefined	0	4.92814	27.6148	15.2952	19.9844	28.4102	2.66876	12.1161
miR5077_1	osa-miR5077	TTCACGTCGGGTTCACCA	18	undefined	33.7141	89.4304	137.713	79.8787	194.634	188.159	46.6144	280.946
miR7805-5p_1	rgl-miR7805-5p	AAATTTGGTGTGGTGAATAGT	21	undefined	10.7116	2.08498	9.51429	0	8.28192	2.93554	5.02247	8.55251
miR8155_1	cpa-miR8155	AACCTGGCTCTGATACCA	18	undefined	0	0	0	0	25.7963	22.7979	0	6.41439
