# Supplementary material for: Small RNA proﬁling for identification of microRNAs involved in regulation of seed development and lipid biosynthesis in yellowhorn
Source: Research Square preprint supplement (doi:10.21203/rs.3.rs-139285/v1), 2021-01-07
Supplement: Supplementary file 12 [file f76236e55e000996dc62d84a.docx]

**Table S9** Primers for qRT-PCR analysis of differentially expressed miRNAs.

| miRNA | Primer Sequences (5'-3') |
| --- | --- |
| miR172b | AGAATCTTGATGATGCTGCAT |
| miR171i-p5_1 | CTTTTCCTTCTTCTTCTTGC |
| miR7760-p3_1 | GGAGGCGGTGGAGGTGGA |
| miR319p_1 | TTGGATTGAAGGGAGCTCC |
| Xso-miRn80 | TTGGTGTTCTTGGTGGAGATC |
| 5.8S rRNA | GTCTGCCTGGGTGTCACGCAA |
